# Supplementary material for: Large-scale analysis of branchpoint usage across species and cell lines
Source: PubMed Central journal article supplement — Genome Res. 2017 Apr;27(4):639–49. doi: 10.1101/gr.202820.115 (PMC5378181; doi:10.1101/gr.202820.115), 2017-04
Supplement: supp_gr.202820.115_Supplemental_Fig_S1.pdf [file supp_gr.202820.115_Supplemental_Fig_S1.pdf]

**A**

| RNAseq dataset               | Lariat Reads | Unique BPs | Unique Introns |
|------------------------------|--------------|------------|----------------|
| ENCODE                       | 161,749      | 46,732     | 31,691         |
| Mattick                      | 108,927      | 30,686     | 21,913         |
| In-house SF3B1 mut/wt RNAseq | 1,008,741    | 2,712      | 2,308          |
| TOTAL                        | 1,279,417    | 71,272     | 44,332         |

**B**

| Species | Lariat Reads | Unique BPs | Unique Introns |
|---------|--------------|------------|----------------|
| Human   | 4,775,962    | 73,075     | 42,417         |
| Mouse   | 17,213       | 11,226     | 9,340          |
| S Pombe | 58,832       | 3,556      | 1,428          |

**Supplementary Figure 1 - Total raw lariat read counts from all RNAseq sources.**

(A) Total raw lariat read counts in human from different RNAseq sources. (B) Total raw lariat read counts in different species (human, mouse, fission yeast).

1. An integrated encyclopedia of DNA elements in the human genome. *Nature* 489, 57-74, doi:10.1038/nature11247 (2012).
2. Mercer, T. R. et al. Genome-wide discovery of human splicing branchpoints. *Genome research* 25, 290-303, doi:10.1101/gr.182899.114 (2015).
3. Bitton, D. A. et al. LaSSO, a strategy for genome-wide mapping of intronic lariats and branch points using RNA-seq. *Genome research* 24, 1169-1179, doi:10.1101/gr.166819.113 (2014).
4. Yue, F. et al. A comparative encyclopedia of DNA elements in the mouse genome. *Nature* 515, 355-364, doi:10.1038/nature13992 (2014).
