# Supplementary material for: Large-scale analysis of branchpoint usage across species and cell lines
Source: PubMed Central journal article supplement — Genome Res. 2017 Apr;27(4):639–49. doi: 10.1101/gr.202820.115 (PMC5378181; doi:10.1101/gr.202820.115), 2017-04
Supplement: supp_gr.202820.115_Supplemental_Fig_S2.pdf [file supp_gr.202820.115_Supplemental_Fig_S2.pdf]

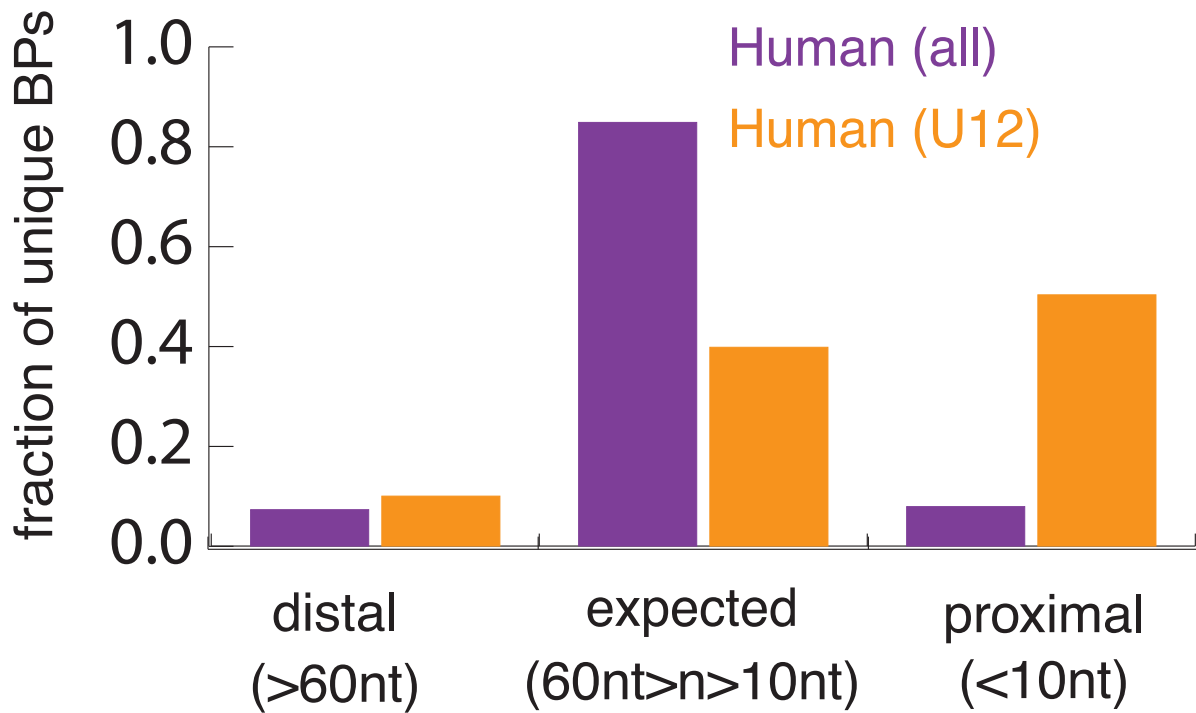

**Supplementary Figure 2 - Distribution of branchpoints discovered in U12 introns compared to all recovered branchpoints.** Branchpoint were stratified into three categories: distal - greater than 60 nucleotides upstream of the 3'ss, expected - within 10 to 60 nucleotides upstream of the 3'ss, and proximal - less than 10 nucleotides upstream of the 3'ss. Purple bars are all human introns. Orange bars are introns derived from U12 introns (as defined by U12DB; Alioto TS. 2007, *Nucleic Acids Research* 35: D110-115.)
