# Supplementary material for: Large-scale analysis of branchpoint usage across species and cell lines
Source: PubMed Central journal article supplement — Genome Res. 2017 Apr;27(4):639–49. doi: 10.1101/gr.202820.115 (PMC5378181; doi:10.1101/gr.202820.115), 2017-04
Supplement: supp_gr.202820.115_Supplemental_Fig_S3.pdf [file supp_gr.202820.115_Supplemental_Fig_S3.pdf]

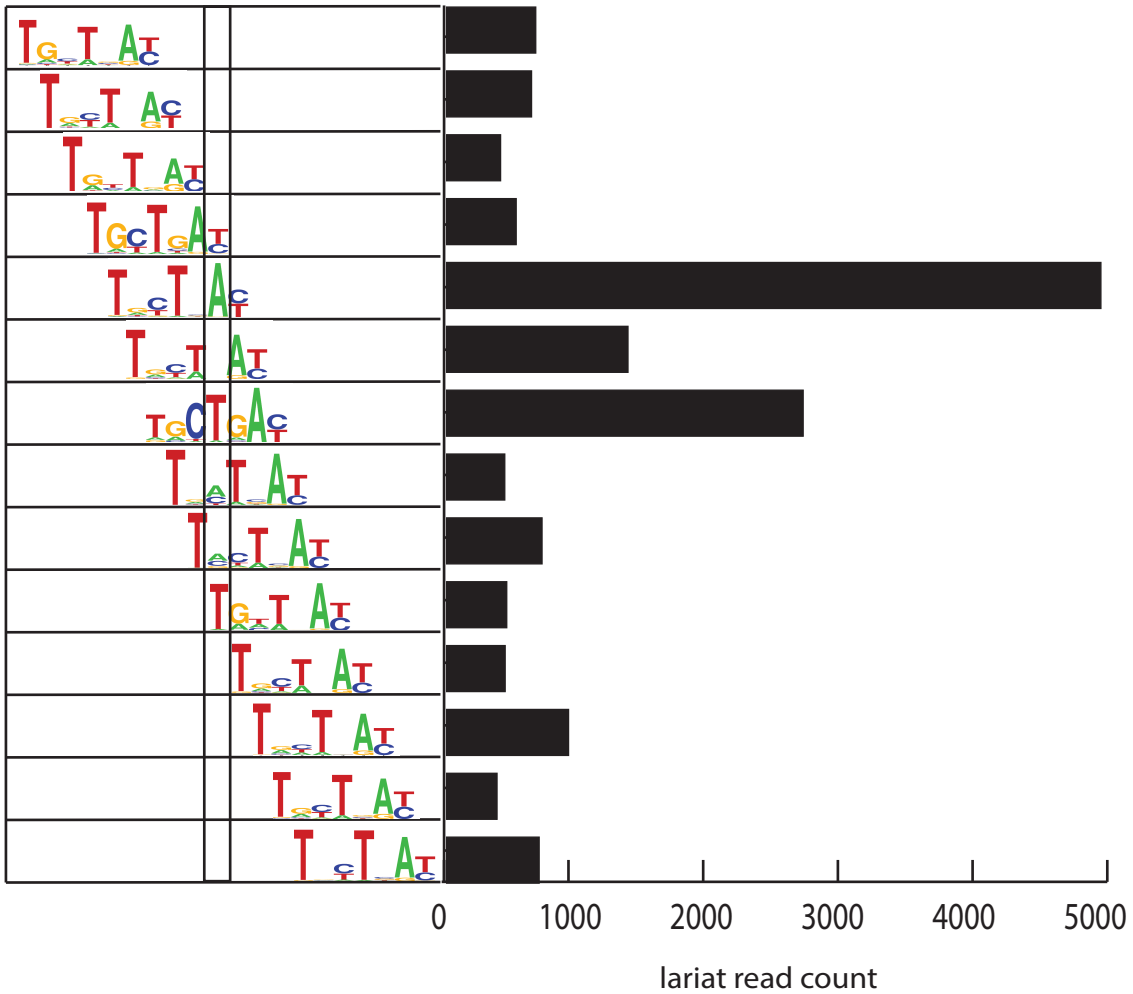

**Supplementary Figure 3 - Read counts across canonical motif at different registers.** All reads map significantly to canonical motif ( $p < 0.01$ ). Boxed nucleotide is last sequenced nucleotide by RT. Pictured motif is the motif from the reads that aligned to canonical motif at each register
