# Supplementary material for: Large-scale analysis of branchpoint usage across species and cell lines
Source: PubMed Central journal article supplement — Genome Res. 2017 Apr;27(4):639–49. doi: 10.1101/gr.202820.115 (PMC5378181; doi:10.1101/gr.202820.115), 2017-04
Supplement: supp_gr.202820.115_Supplemental_Fig_S4.pdf [file supp_gr.202820.115_Supplemental_Fig_S4.pdf]

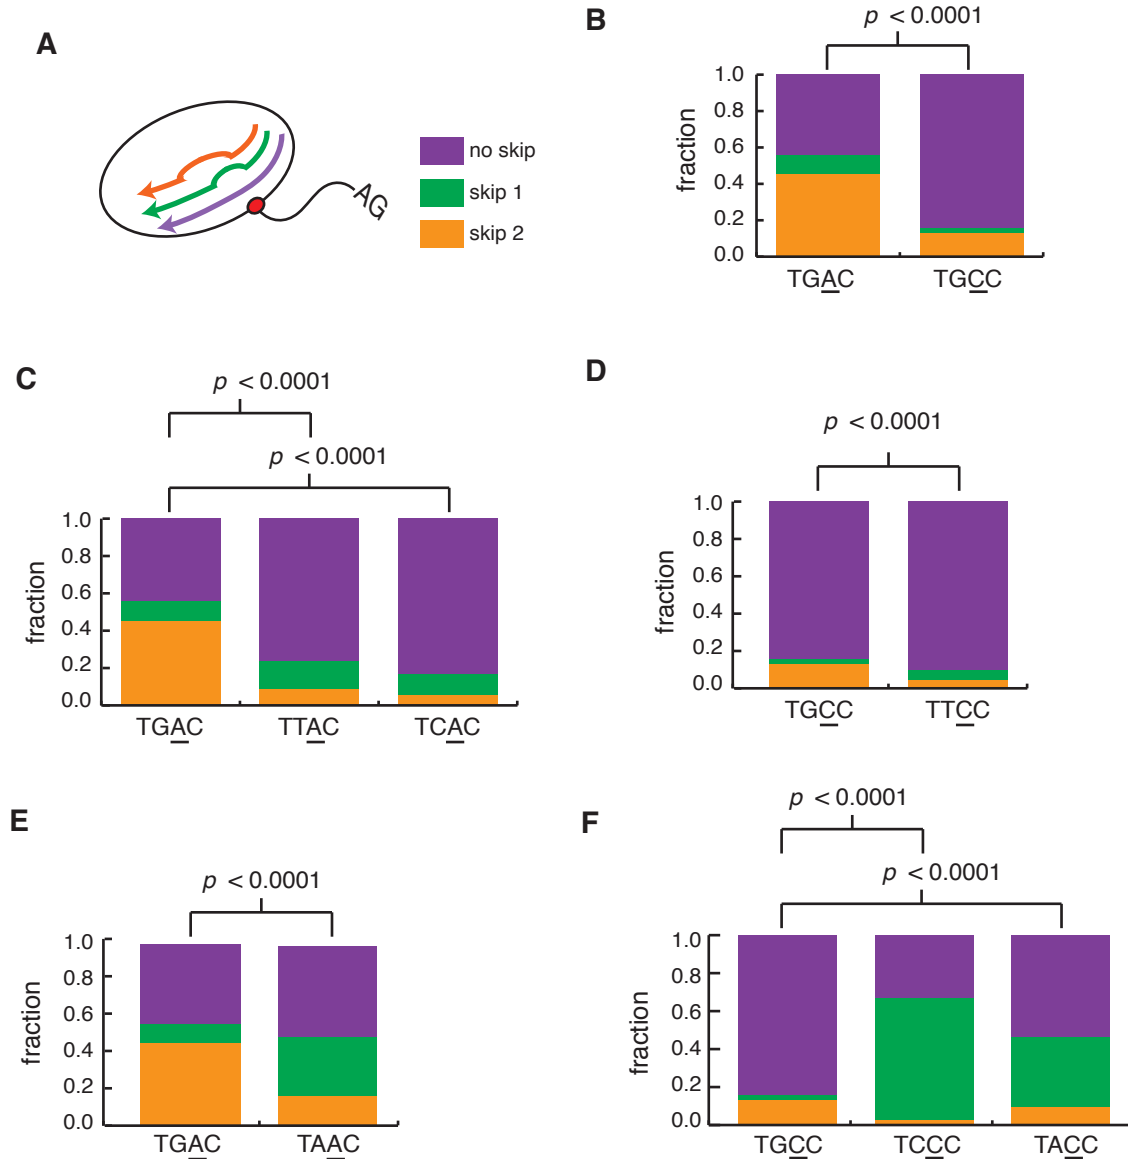

**Supplementary Figure 4 - RT behavior over 2-5' junction is sequence dependent.** (A) Schematic demonstrating RT behavior over 2-5' junction. RT will either sequence the BP nucleotide, skip 1, or skip 2 nucleotides. (B) RT is more likely to skip over 'A' branchpoints than 'C' branchpoints (branchpoint underlined). (C) and (D) - A pyrimidine in the -1 position decreases skipping in both 'A' branchpoint C and 'C' branchpoint D lariats. (E) and (F) - There is ambiguity in branchpoint usage in the case of TAAC, TCCC, and TACC. In this case the enrichment at the -1 position could occur either from skipping or from the -1 position being used as true branchpoint (see Supplementary Fig 4). *p*-values determined using chi-square test.
