# Supplementary material for: Large-scale analysis of branchpoint usage across species and cell lines
Source: PubMed Central journal article supplement — Genome Res. 2017 Apr;27(4):639–49. doi: 10.1101/gr.202820.115 (PMC5378181; doi:10.1101/gr.202820.115), 2017-04
Supplement: supp_gr.202820.115_Supplemental_Fig_S5.pdf [file supp_gr.202820.115_Supplemental_Fig_S5.pdf]

| gene    | BP sequence         | BP position |
|---------|---------------------|-------------|
| HACE1   | TGCTAAC<br>••       | -28         |
| MDM2    | •<br>TGCTAAT<br>••• | -17         |
| BTBD7   | ••<br>TGCTAAT       | -36         |
| MAST4   | ••<br>TACTAAC       | -20         |
| PSMA6   | ••<br>TTCTAAC       | -31         |
| TCERG1  | •<br>••<br>TACTAAT  | -24         |
| COX7B   | ••<br>TGATAAT       | -35         |
| UBR4    | •<br>•••<br>TGCTAAT | -30         |
| ERRFI1  | ••<br>TATTAAT       | -19         |
| DCBLD2  | ••<br>TGTTAAT       | -40         |
| DDX42   | ••<br>TGTTAAT       | -22         |
| TNFAIP3 | •<br>•••<br>TACTAAC | -21         |

**Supplementary Figure 5 - Evidence for usage of either A in TRYTAAY motif.**

Twelve instances of the TRYTAAY motif, in which read evidence exists for usage of either A nucleotide as the nucleophile. Each dot is representative of read validation of the usage of that nucleotide as the branchpoint. Red dots represent an A->T mutation at that position and black dots represent no mutation
