# Supplementary material for: Large-scale analysis of branchpoint usage across species and cell lines
Source: PubMed Central journal article supplement — Genome Res. 2017 Apr;27(4):639–49. doi: 10.1101/gr.202820.115 (PMC5378181; doi:10.1101/gr.202820.115), 2017-04
Supplement: supp_gr.202820.115_Supplemental_Fig_S7.pdf [file supp_gr.202820.115_Supplemental_Fig_S7.pdf]

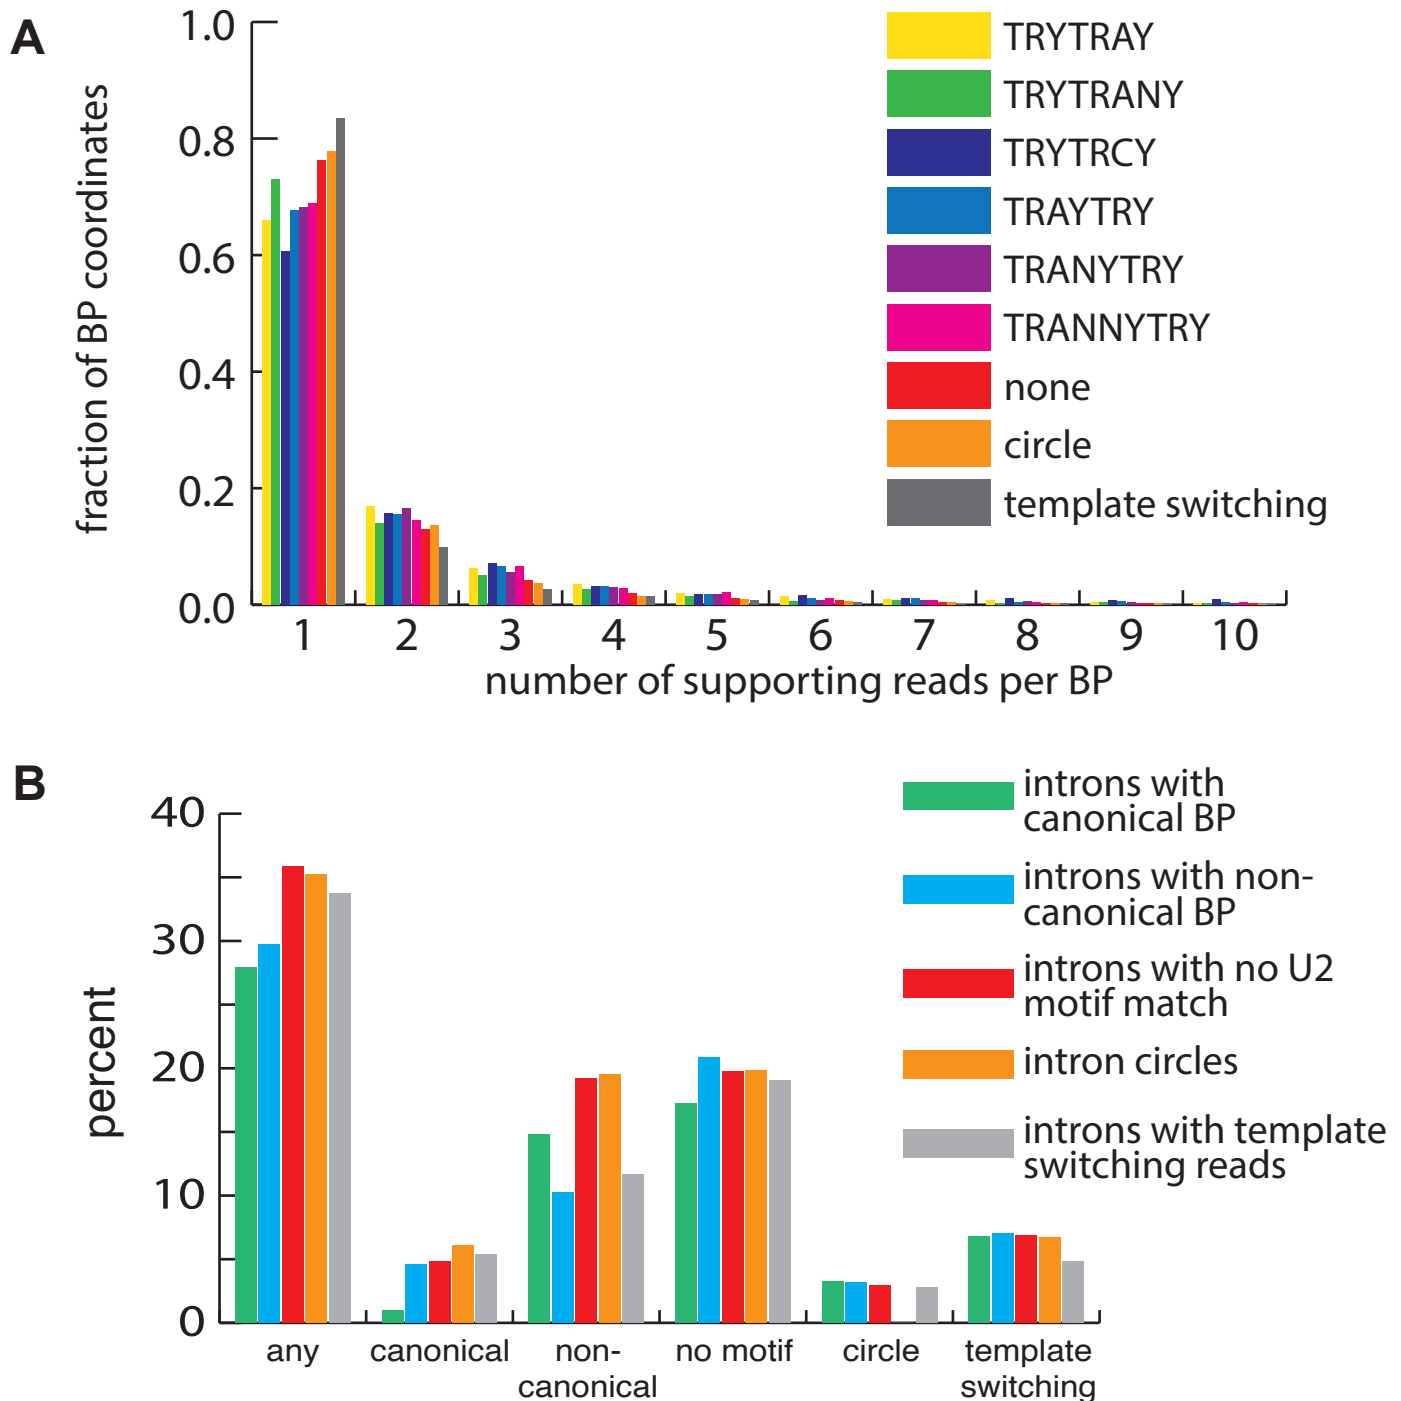

**Supplementary Figure 7 - Branchpoint motif supporting read evidence and co-occurrence with additional branchpoints in same intron.** (A) Histogram depicting the number of supporting reads per mapped branchpoint, stratified by the matched premRNA-U2 alignment motif. Y-axis is the fraction of branchpoints that fall into each bin. X-axis is the number of supporting reads per unique branchpoint. (B) Co-occurrence of different branchpoint motif classes with an additional branchpoint in the same intron. Y-axis is the percent of introns in each motif class that has an additional branchpoint as described on the x-axis. The 'any' x-axis bin includes canonical branchpoints, non-canonical branchpoints, and no motif branchpoints (excludes circles and template switching events). Canonical BP introns fit the TRYTRAY motif. Non-canonical BP introns fit TRYTRANY, TRYTRCY, TRAYTRY, TRANYTRY, and TRANNYTRY motifs.
