# Supplementary material for: Large-scale analysis of branchpoint usage across species and cell lines
Source: PubMed Central journal article supplement — Genome Res. 2017 Apr;27(4):639–49. doi: 10.1101/gr.202820.115 (PMC5378181; doi:10.1101/gr.202820.115), 2017-04
Supplement: supp_gr.202820.115_Supplemental_Fig_S9.pdf [file supp_gr.202820.115_Supplemental_Fig_S9.pdf]

A)

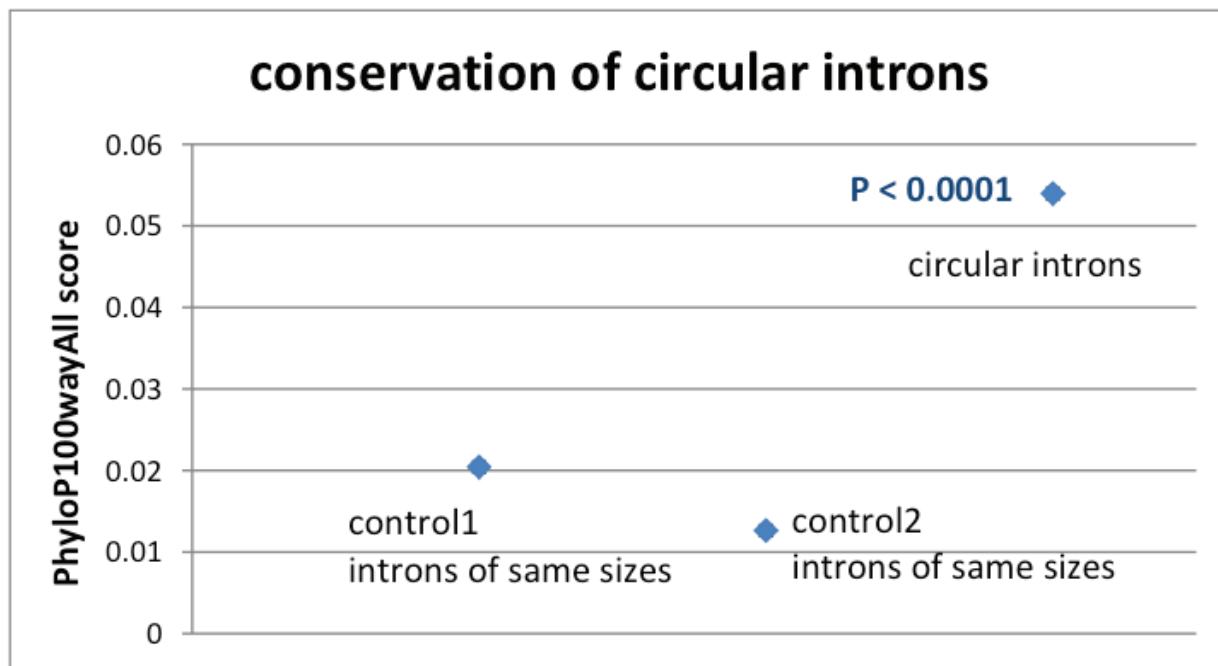

B)

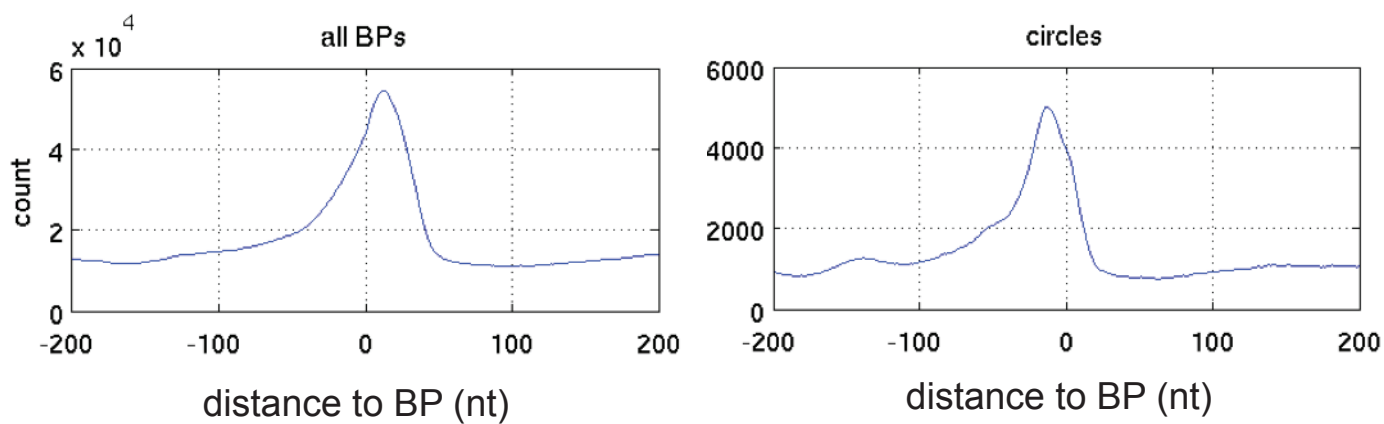

**Supplementary Figure 9 - Conservation and U2AF2 binding of circularized introns.**

(A) The conservation of introns observed to circularize compared to conservation of introns not observed to circularize, controlled by intron length. Conservation scores were determined using PhyloP100wayAll. (B) U2AF2 CLIP binding peaks around all branchpoints (left) and apparent branchpoint junctions for fully circularized introns (right). (Shao et al 2014)
