# Supplementary material for: Large-scale analysis of branchpoint usage across species and cell lines
Source: PubMed Central journal article supplement — Genome Res. 2017 Apr;27(4):639–49. doi: 10.1101/gr.202820.115 (PMC5378181; doi:10.1101/gr.202820.115), 2017-04
Supplement: supp_gr.202820.115_Supplemental_Fig_S10.pdf [file supp_gr.202820.115_Supplemental_Fig_S10.pdf]

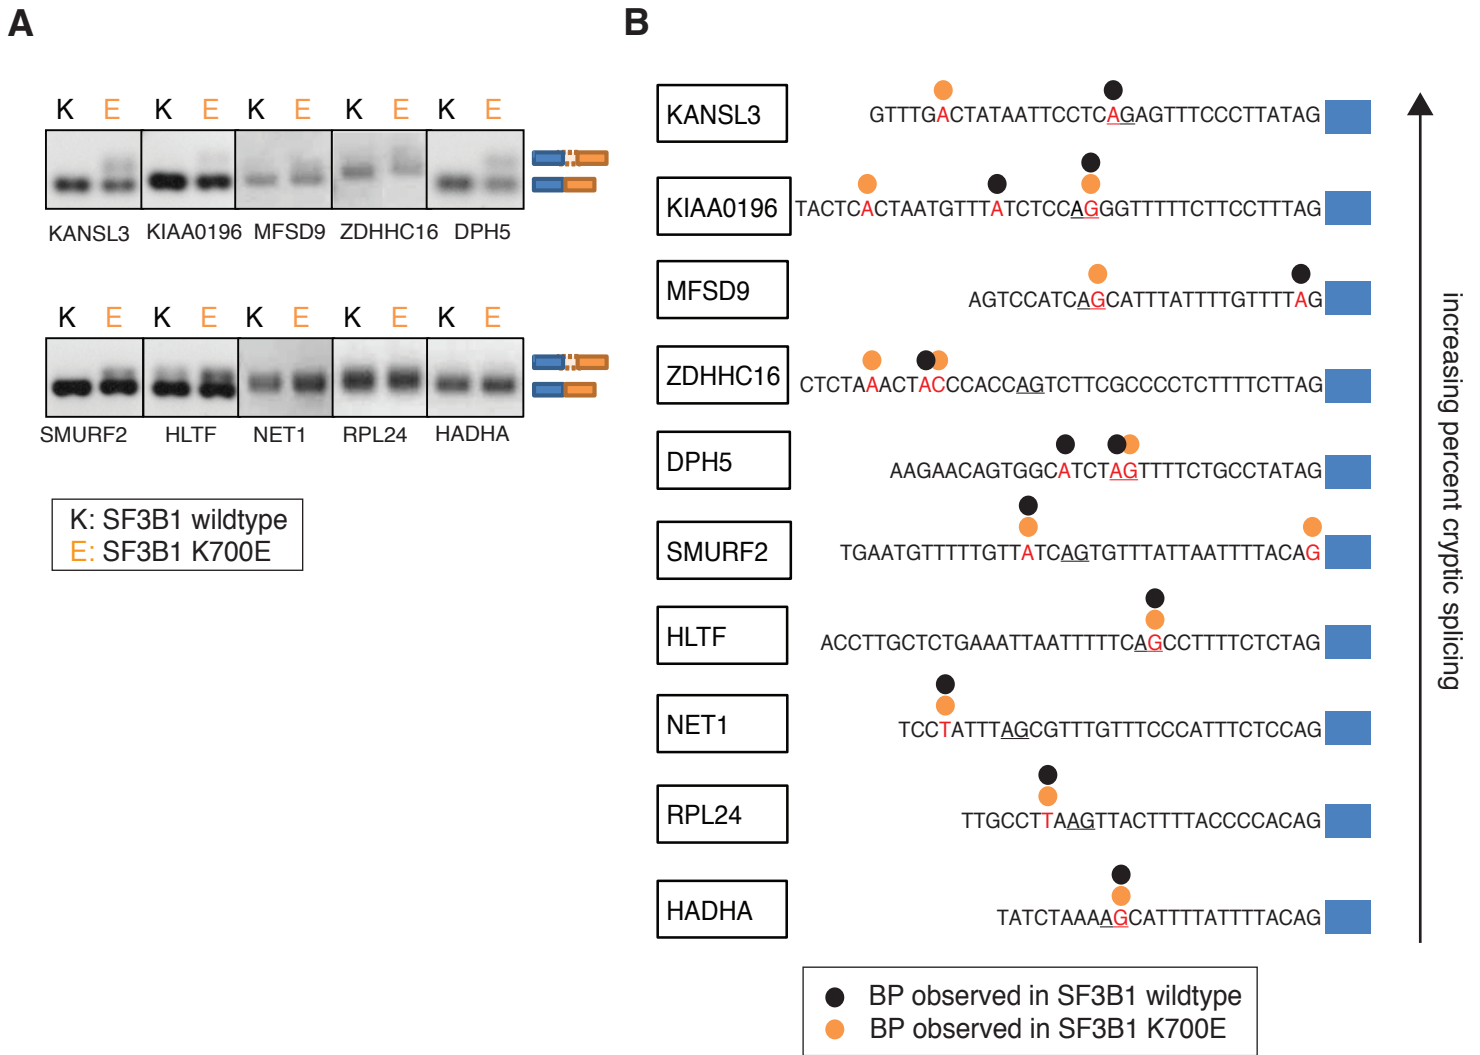

**Supplementary Figure 10 - Measuring branch site usage in SF3B1 mutant background using Sanger sequencing.** (A) The extent of cryptic upstream 3'ss usage in SF3B1 wildtype (black) and SF3B1 mutant (orange) backgrounds. (B) Lariats validated using RT-PCR and Sanger sequencing. Each dot represents a validated branchpoint (mutant - orange, black-wildtype).
