# Supplementary material for: Large-scale analysis of branchpoint usage across species and cell lines
Source: PubMed Central journal article supplement — Genome Res. 2017 Apr;27(4):639–49. doi: 10.1101/gr.202820.115 (PMC5378181; doi:10.1101/gr.202820.115), 2017-04
Supplement: supp_gr.202820.115_Supplemental_Fig_S12.pdf [file supp_gr.202820.115_Supplemental_Fig_S12.pdf]

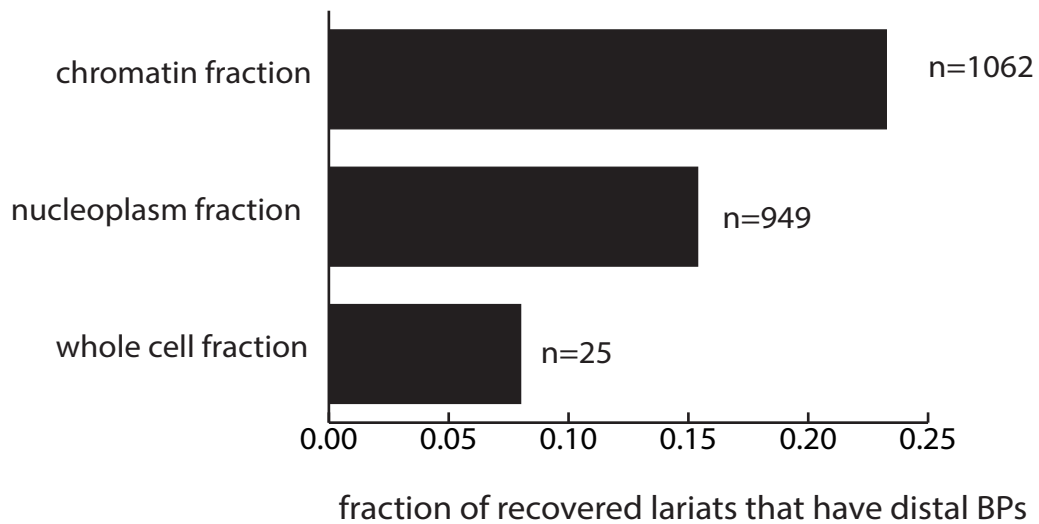

**Supplementary Figure 12 - Distal branch point lariats are enriched in chromatin fraction.** Fraction of recovered lariats that have distal branchpoints in the chromatin, nucleoplasm, and whole cell fraction in K562 cells.
