# Supplementary material for: Large-scale analysis of branchpoint usage across species and cell lines
Source: PubMed Central journal article supplement — Genome Res. 2017 Apr;27(4):639–49. doi: 10.1101/gr.202820.115 (PMC5378181; doi:10.1101/gr.202820.115), 2017-04
Supplement: supp_gr.202820.115_Supplemental_scripts.pdf [file supp_gr.202820.115_Supplemental_scripts.pdf]

## 1 - Lariat Read Aligner Scripts:

README.txt

Make sure to have bowtie and bedtools in path.

usage:

```
perl find_lariats.pl -f file.fastq -i bowtieindex -o outputdirectory
```

optional flags:

-h this help message

-m minimum fragment length

-l read lengths

Results are in file "lariat\_data\_table.txt"

columns are

1-directory

2-inverted alignment type

3-read ID

4-raw read sequence

5-chromosome

6-5'ss

7-3'ss

8-BP

9-raw branch site sequence

indexes included (these can be downloaded from

[http://fairbrother.biomed.brown.edu/data/Lariat2016/lariat\\_scripts.tar.gz](http://fairbrother.biomed.brown.edu/data/Lariat2016/lariat_scripts.tar.gz))

human (hg19): -i ./hg19/hg19

mouse (mm9): -i ./mm9/mm9

s. pombe (EF2): -i ./EF2/genome

```

#find_lariats.pl

#use warnings;
use Getopt::Std;

use lib ('.');
use aligner; use splicemap; use filter; use analyzer;

my %options=();
getopts("hf:i:m:l:o:",\%options);

if (defined $options{h}){
    &displayHelp();
}

elsif ((defined $options{f})&&(defined $options{i})&&(defined $options{o}))){

    $file = $options{f};
    $index = $options{i};
    $outdir = $options{o};

    if (defined $options{m}){$minfraglen = $options{m};}
    else {$minfraglen = 8;}

    if (defined $options{l}){$readlen = $options{l};}
    else {$readlen = 76;}

    ##Align fragments to index

    $aligner = aligner->new($file,$index,$readlen,$minfraglen,$outdir);
    $aligner->align();

    ##Filter reads

    $filter = filter->new($file,$outdir);
    $filter->outOfOrder();

    ##Map alignments to splicemap

    $splicemap = splicemap->new($outdir,$index);

    #outoforder, both map
    $splicemap->mapSS("outoforder.txt");
    $splicemap->sameTranscript("outoforder_ss.txt");
    $splicemap->findLariats("outoforder_ss_filter.txt");

```

```
$splicemap->resolveGaps("outoforder_ss_filter_lariats_gap.txt");
```

```
##Format data into bed files of bp/read alignments, and fasta files of bpseq
```

```
$analyzer = analyzer-  
>new($outdir,$index,"outoforder_ss_filter_lariats.txt","outoforder_ss_filter_lariats_overlap.txt","outoforder_ss_filter_lariats_gap_truelariats.txt");  
$analyzer->exact();  
$analyzer->overlap();  
$analyzer->gap();  
  
}  
  
else {  
  &displayHelp();  
}  
  
sub displayHelp {  
  print "\n\nusage:\nperl find_lariats.pl -f file.fastq -i bowtieindex -o outputdirectory\n\n";  
  print "optional flags:\n-h this help message\n-m minimum fragment length\n-l read lengths\n\n";  
}
```

```

#aligner.pm

package aligner;

use warnings;

sub new
{
    my $class = shift;
    my $self = {
        _rawfile => shift,
        _index => shift,
        _readlen => shift,
        _minfraglen => shift,
        _outdir => shift,
    };

    print "\n\n*****\nparsing fastq files\n\n";

    $self->{_rawfile} =~ /(.+).fa?s?t?q/;
    $self->{_base} = $1;
    $self->{_file}=$self->{_outdir}."/seq.fastq";

    $mkdir = "mkdir ".$self->{_outdir};
    $cp = "cp ".$self->{_rawfile}." ".$self->{_file};

    system($mkdir);
    system($cp);

    bless $self, $class;
    return $self;
}

sub forwardAlign {

    my $self = shift;
    my $file = $self->{_file};
    my $index = $self->{_index};

    print "\n\n*****\nconducting forward alignment: \n";

    $command = "bowtie -v3 -p8 -k1 ".$index." ".$file." --un ".$self->{_outdir}."/unaligned.fastq >
".$self->{_outdir}."/aligned.txt";
    print $command,"\n\n";
    system($command);
}

```

```

$cp1 = "cp "$self->{_outdir}."/unaligned.fastq "$self->{_outdir}."/unaligned_left.fastq";
$cp2 = "cp "$self->{_outdir}."/unaligned.fastq "$self->{_outdir}."/unaligned_right.fastq";

system($cp1);
system($cp2);

}

sub fragmentAlignLeft {

    my $self = shift;

    print "\n\n*****\nprocessing left side: \n";

    my $file = $self->{_outdir}."/unaligned_left.fastq";
    my $index = $self->{_index};

    for (my $j = $self->{_minfraglen}; $j<= ($self->{_readlen}-$self->{_minfraglen}); $j++){
        $file =~ /(.*left)/;
        $remainderfile = $1."_".$j.".fastq";
        $maxfile = $1."_multalignments_".$j.".fastq";
        $outfile = $1."_".$j.".txt";
        $alignedfq = $self->{_outdir}."/left_aligned_".$j.".fastq";
        $command = "bowtie -v0 -p8 -a -m1 --trim3 ".$j." ".$index." ".$file." --un ".$remainderfile." --max
".$maxfile." --al ".$alignedfq." > ".$outfile;
        print "\n\n*****\nexecuting: ",$command,"\n";
        system($command);

        $prevrem = $file;

        $rmmax = "rm ".$maxfile;
        $rmprevrem = "rm ".$prevrem;

        system($rmmax);
        system($rmprevrem);

        $file = $remainderfile;
    }
}

sub fragmentAlignRight {

    my $self = shift;

```

```

print "\n\n*****\nprocessing right side: \n";

my $file = $self->{_outdir}."/unaligned_right.fastq";
my $index = $self->{_index};

for (my $j = $self->{_minfraglen}; $j<= ($self->{_readlen}-$self->{_minfraglen}); $j++){
    $file =~ /(.*/right)/;
    $remainderfile = $1."_".$j.".fastq";
    $maxfile = $1."_multalignments_".$j.".fastq";
    $outfile = $1."_".$j.".txt";
    $alignedfq = $self->{_outdir}."/right_aligned_".$j.".fastq";
    $command = "bowtie -v0 -p8 -a -m1 --trim5 ".$j." ".$index." ".$file." --un ".$remainderfile." --max
".$maxfile." --al ".$alignedfq." > ".$outfile;
    print "\n\n*****\nexecuting: ",$command,"\n";
    system($command);

    $prevrem = $file;

    $rmmax = "rm ".$maxfile;
    $rmprevrem = "rm ".$prevrem;

    system($rmmax);
    system($rmprevrem);

    $file = $remainderfile;

}

}

sub align {

    my $self = shift;

    &forwardAlign($self);
    &fragmentAlignLeft($self);
    &fragmentAlignRight($self);
    &mergeSides($self);
    &rmTempFiles($self);

}

sub mergeSides {

```

```

my $self = shift;

print "\n\n*****\ncompiling left and right sides: \n";

$alldatafile = $self->{_outdir}."/new_alignments.txt";
open (FHout, ">$alldatafile") or die $!;

my %lefthits;

for (my $j = $self->{_minfraglen}; $j<= ($self->{_readlen}-$self->{_minfraglen}); $j++){
    $leftsam = $self->{_outdir}."/unaligned_left_".$j.".txt";
    open (FH, "$leftsam");
    while (<FH>){
        $data = $_;
        chomp $data;
        $id = (split /\t/, $data)[0];
        if ($id =~ /^@/){}
        else {
            $id = (split /\t/, $data)[0];
            $lefthits{$id}[0] = 0;
            $lefthits{$id}[1] = $data;
            $lefthits{$id}[2] = "0\t0\t0\t0\t0\t0\t0\t0";
        }
    }
    close FH;
}

for (my $j = $self->{_minfraglen}; $j<= ($self->{_readlen}-$self->{_minfraglen}); $j++){
    $leftfq = $self->{_outdir}."/left_aligned_".$j.".fastq";
    if (-e $leftfq){
        open (FH, "$leftfq");
        $line = 1;
        while (<FH>){
            chomp $_;
            if ($line == 1){
                $id = $_;
                $id =~ s/^@//g;
            }
            elsif (($line == 2) && ($_ =~ /[ACGTNacgtn+]/)){
                $seq = $1;
                $lefthits{$id}[0] = $seq;
            }
            $line++;
            if ($line == 5){
                $line = 1;
            }
        }
    }
}

```

```

    }}
}

for (my $j = $self->{_minfraglen}; $j<= ($self->{_readlen}-$self->{_minfraglen}); $j++){
    $rightsam = $self->{_outdir}."/unaligned_right_".$j.".txt";
    open (FH, "$rightsam");
    while (<FH>){
        $data = $_;
        chomp $data;
        $id = (split /\t/, $data)[0];
        if ($id =~ /^@/){}
        else {
            $id = (split /\t/, $data)[0];
            if (exists $lefthits{$id}[0]){
                $lefthits{$id}[2] = $data;
            }
            else {
                $lefthits{$id}[0] = 0;
                $lefthits{$id}[2] = $data;
                $lefthits{$id}[1] = "0\t0\t0\t0\t0\t0\t0\t0";
            }
        }
    }
}
close FH;
}

```

```

for (my $j = $self->{_minfraglen}; $j<= ($self->{_readlen}-$self->{_minfraglen}); $j++){
    $rightfq = $self->{_outdir}."/right_aligned_".$j.".fastq";
    if (-e $rightfq){
        open (FH, "$rightfq");
        $line = 1;
        while (<FH>){
            chomp $_;
            if ($line == 1){
                $id = $_;
                $id =~ s/^@//g;
            }
            elsif (($line == 2) && ($_ =~ /[ACGTNacgtn+]/)){
                $seq = $_;
                $lefthits{$id}[0] = $seq;
            }
            $line++;
            if ($line == 5){
                $line = 1;
            }
        }
    }
}
}
}

```



```
}

foreach my $key (keys %lefthits){
    print FHout $key, "\t";
    print FHout $lefthits{$key}[0], "\t";
    print FHout $lefthits{$key}[1], "\t";
    print FHout $lefthits{$key}[2], "\n";
}
close FHout;
}

sub rmTempFiles {

    my $self = shift;

    $rm = "rm ".$self->{_outdir}."/*.*fastq ".$self->{_outdir}."/unaligned*.txt";
    print "\n", $rm, "\n\n";
    system($rm);

}

1;
```

```
#analyzer.pm
```

```
package analyzer;  
#use warnings;
```

```
sub new
```

```
{  
  my $class = shift;  
  my $self = {  
    _outdir => shift,  
    _index => shift,  
    _exact => shift,  
    _overlap => shift,  
    _gap => shift,  
  };  
  
  $rm = "rm ".$self->{_outdir}."/lariat_data_table.txt";  
  system($rm);  
  
  bless $self, $class;  
  return $self;  
}
```

```
sub exact
```

```
{  
  my $self = shift;  
  $file = $self->{_outdir}."/".$self->{_exact};  
  $fileout = $self->{_outdir}."/lariat_data_table.txt";  
  open (FH, $file) or die $!;  
  open (FHout, ">>$fileout") or die $!;  
  while (<FH>){  
    $line = $_;  
    $id = (split /\t/, $line)[0];  
    $seq = (split /\t/, $line)[1];  
    $readstrand = (split /\t/, $line)[3];  
    $chrom = (split /\t/, $line)[4];  
    $headseq = (split /\t/, $line)[6];  
    $tailseq = (split /\t/, $line)[14];  
    $headcoord1 = (split /\t/, $line)[5];  
    $headcoord2 = length($headseq)+$headcoord1;  
    $tailcoord1 = (split /\t/, $line)[13];  
    $tailcoord2 = length($tailseq)+$tailcoord1;  
    my @ss;  
    for (my $j = 18; $j<=25; $j++){
```

```

        push(@ss,((split /\t/, $line)[ $j]));
    }
    for (my $j = 0; $j<=8; $j++){
        if ($ss[$j] =~ /\w+:(\d+)_([+-])/){
            $coord = $1;
            $strand = $2;
            $ss_coord[$j][0] = $coord;
            $ss_coord[$j][1] = $strand;
        }
        else {
            $ss_coord[$j][0] = undef;
            $ss_coord[$j][1] = undef;
        }
    }
    #sense, positive strand
    if (($ss_coord[2][0]==$tailcoord1)&&($ss_coord[2][1] eq $readstrand)&&($readstrand eq
">+_")&&($ss_coord[2][1] ne undef)){
        $threeprss = $ss_coord[5][0];
        print FHout $self-
> {_outdir}, "\texact\t", $id, "\t", $seq, "\t", $chrom, "\t+\t", $tailcoord1, "\t", $threeprss, "\t", $headcoord2, "\t";
        $bpseq1 = $headcoord2-5;
        $bpseq2 = $headcoord2+5;
        $fhbed = $self->{_outdir}."/tempcoord.bed";
        $fhfasta = $self->{_outdir}."/tempseq.fasta";
        open (FHbed, ">$fhbed") or die $!;
        print FHbed $chrom, "\t", $bpseq1, "\t", $bpseq2, "\t", $id, "\t0\t+\n";
        close FHbed;
        $command = "bedtools getfasta -s -fi ".$self->{_index}.".fa -bed ".$fhbed." -fo ".$fhfasta;
        system($command);
        open (FHfasta, $fhfasta) or die $!;
        while (<FHfasta>){
            $_ =~ s/^s//g;
            if ($_ =~ /chr/){}
            elsif ($_ =~ /^[ACGTUNacgtun]+$/){
                $seq = $1;
                $seq =~ tr/a-z/A-Z/;
                print FHout $seq;
            }
        }
        print FHout "\n";
        close FHfasta;
        $command1 = "rm ".$self->{_outdir}."/tempcoord.bed";
        $command2 = "rm ".$self->{_outdir}."/tempseq.fasta";
        system($command1);
        system($command2);
    }
}

```

```

#sense, negative strand
if (($ss_coord[3][0]==$stailcoord2)&&($ss_coord[3][1] eq $readstrand)&&($readstrand eq "-"
)&&($ss_coord[3][1] ne undef)){
    $threeprss = $ss_coord[4][0];
    print FHout $self->{_outdir},"\\texact\\t",$id,"\\t",$seq,"\\t",$chrom,"\\t-
\\t",$stailcoord2,"\\t",$threeprss,"\\t",$headcoord1,"\\t";
    $bpseq1 = $headcoord1-5;
    $bpseq2 = $headcoord1+5;
    $fhbed = $self->{_outdir}."/tempcoord.bed";
    $fhfasta = $self->{_outdir}."/tempseq.fasta";
    open (FHbed, ">$fhbed") or die $!;
    print FHbed $chrom,"\\t",$bpseq1,"\\t",$bpseq2,"\\t",$id,"\\t0\\t\\n";
    close FHbed;
    $command = "bedtools getfasta -s -fi ".$self->{_index}.".fa -bed ".$fhbed." -fo ".$fhfasta;
    system($command);
    open (FHfasta, $fhfasta) or die $!;
    while (<FHfasta){
        $_ =~ s/^s//g;
        if ($_ =~ /chr/){}
        elsif ($_ =~ /^[ACGTUNacgtun]+$/){
            $seq = $_;
            $seq =~ tr/a-z/A-Z/;
            print FHout $seq;
        }
    }
    print FHout "\\n";
    close FHfasta;
    $command1 = "rm ".$self->{_outdir}."/tempcoord.bed";
    $command2 = "rm ".$self->{_outdir}."/tempseq.fasta";
    system($command1);
    system($command2);
}

#antisense, positive strand
if (($ss_coord[0][0]==$headcoord1)&&($ss_coord[0][1] ne $readstrand)&&($readstrand eq "-"
)&&($ss_coord[0][1] ne undef)){
    $threeprss = $ss_coord[7][0];
    print FHout $self-
>{_outdir},"\\texact\\t",$id,"\\t",$seq,"\\t",$chrom,"\\t+\\t",$headcoord1,"\\t",$threeprss,"\\t",$stailcoord2,"\\t";
    $bpseq1 = $stailcoord2-5;
    $bpseq2 = $stailcoord2+5;
    $fhbed = $self->{_outdir}."/tempcoord.bed";
    $fhfasta = $self->{_outdir}."/tempseq.fasta";
    open (FHbed, ">$fhbed") or die $!;
    print FHbed $chrom,"\\t",$bpseq1,"\\t",$bpseq2,"\\t",$id,"\\t0\\t+\\n";
    close FHbed;
    $command = "bedtools getfasta -s -fi ".$self->{_index}.".fa -bed ".$fhbed." -fo ".$fhfasta;

```

```

system($command);
open (FHfasta, $fhfasta) or die $!;
while (<FHfasta>){
    $_ =~ s/^s//g;
    if ($_ =~ /chr/){}
    elsif ($_ =~ /^[ACGTUNacgtun]+$/){
        $seq = $1;
        $seq =~ tr/a-z/A-Z/;
        print FHout $seq;
    }
}
print FHout "\n";
close FHfasta;
$command1 = "rm ".$self->{_outdir}."/tempcoord.bed";
$command2 = "rm ".$self->{_outdir}."/tempseq.fasta";
system($command1);
system($command2);
}
#antisense, negative strand
if (($ss_coord[1][0]==$headcoord2)&&($ss_coord[1][1] ne $readstrand)&&($readstrand eq
"+")&&($ss_coord[1][1] ne undef)){
    $threeprss = $ss_coord[6][0];
    print FHout $self->{_outdir},"\textact\t",$id,"\t",$seq,"\t",$chrom,"\t-
\t",$headcoord2,"\t",$threeprss,"\t",$tailcoord1,"\t";
    $bpseq1 = $tailcoord1-5;
    $bpseq2 = $tailcoord1+5;
    $fhbed = $self->{_outdir}."/tempcoord.bed";
    $fhfasta = $self->{_outdir}."/tempseq.fasta";
    open (FHbed, ">$fhbed") or die $!;
    print FHbed $chrom,"\t",$bpseq1,"\t",$bpseq2,"\t",$id,"\t0\t\n";
    close FHbed;
    $command = "bedtools getfasta -s -fi ".$self->{_index}.".fa -bed ".$fhbed." -fo ".$fhfasta;
    system($command);
    open (FHfasta, $fhfasta) or die $!;
    while (<FHfasta>){
        $_ =~ s/^s//g;
        if ($_ =~ /chr/){}
        elsif ($_ =~ /^[ACGTUNacgtun]+$/){
            $seq = $1;
            $seq =~ tr/a-z/A-Z/;
            print FHout $seq;
        }
    }
}
print FHout "\n";
close FHfasta;
$command1 = "rm ".$self->{_outdir}."/tempcoord.bed";

```

```

        $command2 = "rm ".$self->{_outdir}."/tempseq.fasta";
        system($command1);
        system($command2);
    }
}
close FHout; close FH;
}

```

```

sub overlap {
    $self = shift;
    $file = $self->{_outdir}."/".$self->{_overlap};
    $fileout = $self->{_outdir}."/lariat_data_table.txt";
    open (FH, $file) or die $!;
    open (FHout, ">>$fileout") or die $!;
    while (<FH>){
        $line = $_;
        $id = (split /\t/,$line)[0];
        $seq = (split /\t/,$line)[1];
        $readstrand = (split /\t/,$line)[3];
        $chrom = (split /\t/,$line)[4];
        $headseq = (split /\t/,$line)[6];
        $tailseq = (split /\t/,$line)[14];
        $headcoord1 = (split /\t/,$line)[5];
        $headcoord2 = length($headseq)+$headcoord1;
        $tailcoord1 = (split /\t/,$line)[13];
        $tailcoord2 = length($tailseq)+$tailcoord1;
        $overlap = (length($headseq)+length($tailseq))-length($seq);
    }
}

```

```

my @ss;
for (my $j = 18; $j<=25; $j++){
    push(@ss,((split /\t/,$line)[$j]));
}
for (my $j = 0; $j<=8; $j++){
    if ($ss[$j] =~ /\w+:(\d+)_([+-])/){
        $coord = $1;
        $strand = $2;
        $ss_coord[$j][0] = $coord;
        $ss_coord[$j][1] = $strand;
    }
    else {
        $ss_coord[$j][0] = undef;
        $ss_coord[$j][1] = undef;
    }
}

```

```

}
#sense, positive strand
#if ((abs($ss_coord[2][0]-$tailcoord1)<=$overlap)&&($ss_coord[2][1] eq
$readstrand)&&($readstrand eq "+")&&($ss_coord[2][1] ne undef)){
  if ((abs($ss_coord[2][0]-
$tailcoord1)<=$overlap)&&($ss_coord[2][0]>=$tailcoord1)&&($ss_coord[2][1] eq
$readstrand)&&($readstrand eq "+")&&($ss_coord[2][1] ne undef)){
    $threeprss = $ss_coord[5][0];
    $excess = $ss_coord[2][0] - $tailcoord1;

    $tailcoord1 = $ss_coord[2][0];
    $headcoord2 = $headcoord2-($overlap-$excess);
    print FHout $self->{_outdir},"\toverlap
",$overlap,"\t",$id,"\t",$seq,"\t",$chrom,"\t+\t",$tailcoord1,"\t",$threeprss,"\t",$headcoord2,"\t";
    $bpseq1 = $headcoord2-5;
    $bpseq2 = $headcoord2+5;
    $fhbed = $self->{_outdir}."/tempcoord.bed";
    $fhfasta = $self->{_outdir}."/tempseq.fasta";
    open (FHbed, ">$fhbed") or die $!;
    print FHbed $chrom,"\t",$bpseq1,"\t",$bpseq2,"\t",$id,"\t0\t+\n";
    close FHbed;
    $command = "bedtools getfasta -s -fi ".$self->{_index}.".fa -bed ".$fhbed." -fo ".$fhfasta;
    system($command);
    open (FHfasta, $fhfasta) or die $!;
    while (<FHfasta>){
      $_ =~ s/^s//g;
      if ($_ =~ /chr/){}
      elsif ($_ =~ /^[ACGTUNacgtun]+$/){
        $seq = $1;
        $seq =~ tr/a-z/A-Z/;
        print FHout $seq;
      }
    }
  }
  print FHout "\n";
  close FHfasta;
  $command1 = "rm ".$self->{_outdir}."/tempcoord.bed";
  $command2 = "rm ".$self->{_outdir}."/tempseq.fasta";
  system($command1);
  system($command2);
}
#sense, negative strand
if (((-1)*($ss_coord[3][0]-
$tailcoord2)<=$overlap)&&($tailcoord2>=$ss_coord[3][0])&&($ss_coord[3][1] eq
$readstrand)&&($readstrand eq "-")&&($ss_coord[3][1] ne undef)){

  $threeprss = $ss_coord[4][0];

```

```

$excess = $stailcoord2-$ss_coord[3][0];
$stailcoord2 = $ss_coord[3][0];
$headcoord1 = $headcoord1+($overlap-$excess);
print FHout $self->{_outdir}, "\toverlap ", $overlap, "\t", $id, "\t", $seq, "\t", $chrom, "\t-
\t", $stailcoord2, "\t", $threeprss, "\t", $headcoord1, "\t";
$bpseq1 = $headcoord1-5;
$bpseq2 = $headcoord1+5;
$fhbed = $self->{_outdir}."/tempcoord.bed";
$fhfasta = $self->{_outdir}."/tempseq.fasta";
open (FHbed, ">$fhbed") or die $!;
print FHbed $chrom, "\t", $bpseq1, "\t", $bpseq2, "\t", $id, "\t0\t\n";
close FHbed;
$command = "bedtools getfasta -s -fi ".$self->{_index}.".fa -bed ".$fhbed." -fo ".$fhfasta;
system($command);
open (FHfasta, $fhfasta) or die $!;
while (<FHfasta){
    $_ =~ s/^s//g;
    if ($_ =~ /chr/){}
    elsif ($_ =~ /^[ACGTUNacgtun]+$/){
        $seq = $_;
        $seq =~ tr/a-z/A-Z/;
        print FHout $seq;
    }
}
print FHout "\n";
close FHfasta;
$command1 = "rm ".$self->{_outdir}."/tempcoord.bed";
$command2 = "rm ".$self->{_outdir}."/tempseq.fasta";
system($command1);
system($command2);
}
#antisense, positive strand
if (((($ss_coord[0][0]-$headcoord1)<=$overlap)&&($ss_coord[0][0]
>=$headcoord1)&&($ss_coord[0][1] ne $readstrand)&&($readstrand eq "-"&&($ss_coord[0][1] ne
undef)){
    $threeprss = $ss_coord[7][0];
    $excess = $ss_coord[0][0]-$headcoord1;
    $headcoord1 = $ss_coord[0][0];
    $stailcoord2 = $stailcoord2-($overlap-$excess);
    print FHout $self->{_outdir}, "\toverlap
", $overlap, "\t", $id, "\t", $seq, "\t", $chrom, "\t+\t", $headcoord1, "\t", $threeprss, "\t", $stailcoord2, "\t";
    $bpseq1 = $stailcoord2-5;
    $bpseq2 = $stailcoord2+5;
    $fhbed = $self->{_outdir}."/tempcoord.bed";
    $fhfasta = $self->{_outdir}."/tempseq.fasta";
    open (FHbed, ">$fhbed") or die $!;

```



```

print FHbed $chrom,"t",$bpseq1,"t",$bpseq2,"t",$id,"t0\t+\n";
close FHbed;
$command = "bedtools getfasta -s -fi ".$self->{_index}.".fa -bed ".$fhbed." -fo ".$fhfasta;
system($command);
open (FHfasta, $fhfasta) or die $!;
while (<FHfasta>){
    $_ =~ s/^s//g;
    if ($_ =~ /chr/){}
    elsif ($_ =~ /^[ACGTUNacgtun]+$/){
        $seq = $1;
        $seq =~ tr/a-z/A-Z/;
        print FHout $seq;
    }
}
print FHout "\n";
close FHfasta;
$command1 = "rm ".$self->{_outdir}."/tempcoord.bed";
$command2 = "rm ".$self->{_outdir}."/tempseq.fasta";
system($command1);
system($command2);
}
#antisense, negative strand
if (((-1)*($ss_coord[1][0]-
$headcoord2)<=$overlap)&&($headcoord2>=$ss_coord[1][0])&&($ss_coord[1][1] ne
$readstrand)&&($readstrand eq "+")&&($ss_coord[1][1] ne undef)){
    $threeprss = $ss_coord[6][0];
    $excess = $headcoord2-$ss_coord[1][0];
    $headcoord2 = $ss_coord[1][0];
    $tailcoord1 = $tailcoord1+($overlap-$excess);
    print FHout $self->{_outdir},"\toverlap ",$overlap,"t",$id,"t",$seq,"t",$chrom,"t-
\t",$headcoord2,"t",$threeprss,"t",$tailcoord1,"t";
    $bpseq1 = $tailcoord1-5;
    $bpseq2 = $tailcoord1+5;
    $fhbed = $self->{_outdir}."/tempcoord.bed";
    $fhfasta = $self->{_outdir}."/tempseq.fasta";
    open (FHbed, ">$fhbed") or die $!;
    print FHbed $chrom,"t",$bpseq1,"t",$bpseq2,"t",$id,"t0\t+\n";
    close FHbed;
    $command = "bedtools getfasta -s -fi ".$self->{_index}.".fa -bed ".$fhbed." -fo ".$fhfasta;
    system($command);
    open (FHfasta, $fhfasta) or die $!;
    while (<FHfasta>){
        $_ =~ s/^s//g;
        if ($_ =~ /chr/){}
        elsif ($_ =~ /^[ACGTUNacgtun]+$/){
            $seq = $1;

```

```

        $seq =~ tr/a-z/A-Z/;
        print FHout $seq;
    }
}
print FHout "\n";
close FHfasta;
$command1 = "rm ".$self->{_outdir}."/tempcoord.bed";
$command2 = "rm ".$self->{_outdir}."/tempseq.fasta";
system($command1);
system($command2);
}
}
close FHout; close FH;

}

```

```

sub gap {
    $self = shift;
    $file = $self->{_outdir}."/".$self->{_gap};
    $fileout = $self->{_outdir}."/lariat_data_table.txt";
    open (FH, $file) or die $!;
    open (FHout, ">>$fileout") or die $!;
    while (<FH>){
        $line = $_;
        $id = (split /\t/, $line)[0];
        $seq = (split /\t/, $line)[1];
        $readstrand = (split /\t/, $line)[3];
        $chrom = (split /\t/, $line)[4];
        $headseq = (split /\t/, $line)[6];
        $tailseq = (split /\t/, $line)[14];
        $headcoord1 = (split /\t/, $line)[5];
        $headcoord2 = length($headseq)+$headcoord1;
        $tailcoord1 = (split /\t/, $line)[13];
        $tailcoord2 = length($tailseq)+$tailcoord1;
        $gap = length($seq)-(length($headseq)+length($tailseq));
        my @ss;
        for (my $j = 18; $j<=25; $j++){
            push(@ss,((split /\t/, $line)[$j]));
        }
        for (my $j = 0; $j<=8; $j++){
            if ($ss[$j] =~ /\w+:(\d+)_([+-])/){
                $coord = $1;
                $strand = $2;
                $ss_coord[$j][0] = $coord;
            }
        }
    }
}

```

```

        $ss_coord[$j][1] = $strand;
    }
    else {
        $ss_coord[$j][0] = undef;
        $ss_coord[$j][1] = undef;
    }
}
#sense, positive strand
if ((abs($ss_coord[2][0]-$tailcoord1)<=$gap)&&($ss_coord[2][1] eq $readstrand)&&($readstrand
eq "+")&&($ss_coord[2][1] ne undef)){
    $threeprss = $ss_coord[5][0];
    $remainder = $tailcoord1-$ss_coord[2][0];
    $tailcoord1 = $ss_coord[2][0];
    $headcoord2 = $headcoord2+($gap-$remainder);
    print FHout $self->{_outdir},"\tgap
",$gap,"\t",$id,"\t",$seq,"\t",$chrom,"\t+\t",$tailcoord1,"\t",$threeprss,"\t",$headcoord2,"\t";
    $bpseq1 = $headcoord2-5;
    $bpseq2 = $headcoord2+5;
    $fhbed = $self->{_outdir}."/tempcoord.bed";
    $fhfasta = $self->{_outdir}."/tempseq.fasta";
    open (FHbed, ">$fhbed") or die $!;
    print FHbed $chrom,"\t",$bpseq1,"\t",$bpseq2,"\t",$id,"\t0\t+\n";
    close FHbed;
    $command = "bedtools getfasta -s -fi ".$self->{_index}.".fa -bed ".$fhbed." -fo ".$fhfasta;
    system($command);
    open (FHfasta, $fhfasta) or die $!;
    while (<FHfasta){
        $_ =~ s/^s//g;
        if ($_ =~ /chr/){}
        elsif ($_ =~ /^[ACGTUNacgtun]+$/){
            $seq = $_;
            $seq =~ tr/a-z/A-Z/;
            print FHout $seq;
        }
    }
}
print FHout "\n";
close FHfasta;
$command1 = "rm ".$self->{_outdir}."/tempcoord.bed";
$command2 = "rm ".$self->{_outdir}."/tempseq.fasta";
system($command1);
system($command2);
}
#sense, negative strand
if ((abs($ss_coord[3][0]-$tailcoord2)<=$gap)&&($ss_coord[3][1] eq $readstrand)&&($readstrand
eq "-")&&($ss_coord[3][1] ne undef)){
    $threeprss = $ss_coord[4][0];

```

```

$remainder = $ss_coord[3][0]-$tailcoord2;
$tailcoord2 = $ss_coord[3][0];
$headcoord1 = $headcoord1-($gap-$remainder);
print FHout $self->{_outdir}, "\tgap ", $gap, "\t", $id, "\t", $seq, "\t", $chrom, "\t-
\t", $tailcoord2, "\t", $threeprss, "\t", $headcoord1, "\t";
$bpseq1 = $headcoord1-5;
$bpseq2 = $headcoord1+5;
$fhbed = $self->{_outdir}."/tempcoord.bed";
$fhfasta = $self->{_outdir}."/tempseq.fasta";
open (FHbed, ">$fhbed") or die $!;
print FHbed $chrom, "\t", $bpseq1, "\t", $bpseq2, "\t", $id, "\t0\t-\n";
close FHbed;
$command = "bedtools getfasta -s -fi ".$self->{_index}.".fa -bed ".$fhbed." -fo ".$fhfasta;
system($command);
open (FHfasta, $fhfasta) or die $!;
while (<FHfasta){
    $_ =~ s/^s//g;
    if ($_ =~ /chr/){}
    elsif ($_ =~ /^[ACGTUNacgtun]+$/){
        $seq = $_;
        $seq =~ tr/a-z/A-Z/;
        print FHout $seq;
    }
}
print FHout "\n";
close FHfasta;
$command1 = "rm ".$self->{_outdir}."/tempcoord.bed";
$command2 = "rm ".$self->{_outdir}."/tempseq.fasta";
system($command1);
system($command2);
}
#antisense, positive strand
if ((abs($ss_coord[0][0]-$headcoord1)<=$gap)&&($ss_coord[0][1] ne
$readstrand)&&($readstrand eq "-")&&($ss_coord[0][1] ne undef)){
    $threeprss = $ss_coord[7][0];
    $remainder = $headcoord1-$ss_coord[0][0];
    $headcoord1 = $ss_coord[0][0];
    $tailcoord2 = $tailcoord2+($gap-$remainder);
    print FHout $self->{_outdir}, "\tgap
\t", $gap, "\t", $id, "\t", $seq, "\t", $chrom, "\t+\t", $headcoord1, "\t", $threeprss, "\t", $tailcoord2, "\t";
    $bpseq1 = $tailcoord2-5;
    $bpseq2 = $tailcoord2+5;
    $fhbed = $self->{_outdir}."/tempcoord.bed";
    $fhfasta = $self->{_outdir}."/tempseq.fasta";
    open (FHbed, ">$fhbed") or die $!;
    print FHbed $chrom, "\t", $bpseq1, "\t", $bpseq2, "\t", $id, "\t0\t+\n";
}

```

```

close FHbed;
$command = "bedtools getfasta -s -fi ".$self->{_index}.".fa -bed ".$fhbed." -fo ".$fhfasta;
system($command);
open (FHfasta, $fhfasta) or die $!;
while (<FHfasta>){
    $_ =~ s/^s//g;
    if ($_ =~ /chr/){}
    elsif ($_ =~ /^[ACGTUNacgtun]+$/){
        $seq = $1;
        $seq =~ tr/a-z/A-Z/;
        print FHout $seq;
    }
}
print FHout "\n";
close FHfasta;
$command1 = "rm ".$self->{_outdir}."/tempcoord.bed";
$command2 = "rm ".$self->{_outdir}."/tempseq.fasta";
system($command1);
system($command2);
}
#antisense, negative strand
if ((abs($ss_coord[1][0]-$headcoord2)<=$gap)&&($ss_coord[1][1] ne
$readstrand)&&($readstrand eq "+")&&($ss_coord[1][1] ne undef)){
    $threeprss = $ss_coord[6][0];
    $remainder = $ss_coord[1][0]-$headcoord2;
    $headcoord2 = $ss_coord[1][0];
    $tailcoord1 = $tailcoord1-($gap-$remainder);
    print FHout $self->{_outdir},"\tgap ","$gap","\t",$id,"\t",$seq,"\t",$chrom,"\t-
\t",$headcoord2,"\t",$threeprss,"\t",$tailcoord1,"\t";
    $bpseq1 = $tailcoord1-5;
    $bpseq2 = $tailcoord1+5;
    $fhbed = $self->{_outdir}."/tempcoord.bed";
    $fhfasta = $self->{_outdir}."/tempseq.fasta";
    open (FHbed, ">$fhbed") or die $!;
    print FHbed $chrom,"\t",$bpseq1,"\t",$bpseq2,"\t",$id,"\t0\t\n";
    close FHbed;
    $command = "bedtools getfasta -s -fi ".$self->{_index}.".fa -bed ".$fhbed." -fo ".$fhfasta;
    system($command);
    open (FHfasta, $fhfasta) or die $!;
    while (<FHfasta>){
        $_ =~ s/^s//g;
        if ($_ =~ /chr/){}
        elsif ($_ =~ /^[ACGTUNacgtun]+$/){
            $seq = $1;
            $seq =~ tr/a-z/A-Z/;
            print FHout $seq;
        }
    }
}

```

```
    }  
  }  
  print FHout "\n";  
  close FHfasta;  
  $command1 = "rm ".$self->{_outdir}."/tempcoord.bed";  
  $command2 = "rm ".$self->{_outdir}."/tempseq.fasta";  
  system($command1);  
  system($command2);  
}  
}  
close FHout; close FH;  
}  
1;
```

```

#filter.pm

package filter;

use warnings;

sub new
{
    my $class = shift;
    my $self = {
        _rawfile => shift,
        _outdir => shift,
    };

    $self->{_rawfile} =~ /(.(+).fa?s?t?q/;
    $self->{_file}=$self->{_outdir}."/new_alignments.txt";

    bless $self, $class;
    return $self;
}

sub outOfOrder
{
    my $self = shift;
    print "\n\n*****\n\nfiltering out of order reads\n\nopening file: ";
    print $self->{_file}, "\n\n";

    open (FH, $self->{_file});

    $halffile = $self->{_outdir}."/halfmap.txt";
    $outoforderfile = $self->{_outdir}."/outoforder.txt";

    open (FHhalf, ">$halffile") or die $!;
    open (FHoutoforder, ">$outoforderfile") or die $!;

    while (<FH>){

        $line = $_;
        $readid = (split /\t/, $_)[0];
        $readseq = (split /\t/, $_)[1];
        $headstrand = (split /\t/, $_)[3];
        $headchrom = (split /\t/, $_)[4];
        $headcoord = (split /\t/, $_)[5];
        $tailstrand = (split /\t/, $_)[11];
    }
}

```

```
$tailchrom = (split /\t,$_)[12];  
$tailcoord = (split /\t,$_)[13];
```

```
if (($headchrom ne 0)&&($tailchrom ne 0)) {  
  if (($headchrom eq $tailchrom)&&($headstrand eq $tailstrand)) {  
    if (($headstrand eq "+")&&($headcoord > $tailcoord)) {  
      print FHoutoforder $line;  
    }  
    elsif (($headstrand eq "-")&&($headcoord < $tailcoord)) {  
      print FHoutoforder $line;  
    }  
  }  
}  
else {  
  print FHhalf $line;  
}  
}  
close FH;  
close FHhalf;  
closeFHoutoforder;  
}
```

```
sub setFile  
{  
  my $self = shift;  
  $self->{_file} = shift;  
}
```

```
sub getFile  
{  
  my $self = shift;  
  return $self->{_file};  
}
```

```
1;
```



```

#splicemap.pm

package splicemap;

#use warnings;

sub new
{
    my $class = shift;
    my $self = {
        _outdir => shift,
        _index => shift,
    };

    my $fh = $self->{_index}."_ss_table.txt";

    print "\n\n*****\nbuilding splice site hash map\n\n";

    my %splice5pr=();
    my %splice3pr=();

    open (FH,"$fh") or die $!;
    while (<FH>){

        $chr = (split /\t/,$_)[1];
        $id = (split /\t/,$_)[0];
        $strand = (split /\t/,$_)[2];
        $exoncount = (split /\t/,$_)[5];

        if ($exoncount =~ /\d+){
            $exonstarts = (split /\t/,$_)[6];
            $exonstops = (split /\t/,$_)[7];
            @starts = (split /\./,$exonstarts);
            @stops = (split /\./,$exonstops);
            chomp $exonstops;

            for (my $j = 1; $j<$exoncount; $j++){
                if ($strand eq "+"){
                    $fiveprid = $chr." ".$stops[$j-1]."_ ".$strand;
                    $threeprid = $chr." ".$starts[$j]."_ ".$strand;
                }
                else {

```



```
open (FH, $fh) or die $!;  
open (FHout, ">$fhout") or die $!;
```

```
while (<FH>){  
    #loop through and lookup splice hash as you go  
    $data = $_;  
    chomp $data;
```

```
    $seq = (split /\t/, $data)[1];  
    $length = length($seq);
```

```
    $headchrom = (split /\t/, $data)[4];  
    $headstrand = (split /\t/, $data)[3];  
    $headcoord1 = (split /\t/, $data)[5];  
    $headseq = (split /\t/, $data)[6];  
    $headlen = length($headseq);  
    $headcoord2 = $headcoord1+$headlen;
```

```
    $tailstrand = (split /\t/, $data)[11];  
    $tailchrom = (split /\t/, $data)[12];  
    $tailcoord1 = (split /\t/, $data)[13];  
    $tailseq = (split /\t/, $data)[14];  
    $taillen = length($tailseq);  
    $tailcoord2 = $tailcoord1+$taillen;
```

```
    my @lookup;
```

```
    print FHout $data, "\t";
```

```
    $lookupkey[0] = $headchrom." ".$headcoord1."_"."$headstrand;  
    $lookupkey[1] = $headchrom." ".$headcoord2."_"."$headstrand;  
    $lookupkey[2] = $tailchrom." ".$tailcoord1."_"."$tailstrand;  
    $lookupkey[3] = $tailchrom." ".$tailcoord2."_"."$tailstrand;
```

```
    for (my $j = 0; $j<=3; $j++){  
        $foundflag = 0;  
        $dist = 0;  
        if ($lookupkey[$j] =~ /\(w+):(\d+)_(\+|-)/){  
            $chrom = $1; $coord = $2; $strand = $3;  
            while (($dist<=1000)&&($foundflag==0)){
```

```

$newcoord = $coord+$dist;
$lookup = $chrom." ".$newcoord."_+";
if ((exists $ss5{$lookup})&&($foundflag==0)){
    print FHout ($lookup." ".$ss5{$lookup}),"\t";
    $foundflag = 1;
}
$newcoord = $coord-$dist;
$lookup = $chrom." ".$newcoord."_+";
if ((exists $ss5{$lookup})&&($foundflag==0)){
    print FHout ($lookup." ".$ss5{$lookup}),"\t";
    $foundflag = 1;
}
$newcoord = $coord+$dist;
$lookup = $chrom." ".$newcoord."_-";
if ((exists $ss5{$lookup})&&($foundflag==0)){
    print FHout ($lookup." ".$ss5{$lookup}),"\t";
    $foundflag = 1;
}
$newcoord = $coord-$dist;
$lookup = $chrom." ".$newcoord."_-";
if ((exists $ss5{$lookup})&&($foundflag==0)){
    print FHout ($lookup." ".$ss5{$lookup}),"\t";
    $foundflag = 1;
}
}
$dist++;
}}
else {print "error: $lookupkey[$j]\n";}
if ($foundflag ==0){print FHout "null\t";}
}

```

```

for (my $j = 0; $j<=3; $j++){
    $foundflag = 0;
    $dist = 0;
    if ($lookupkey[$j] =~ /(\w+):(\d+)_(\+|\-)/){
        $chrom = $1; $coord = $2; $strand = $3;
        while (($dist<=1000)&&($foundflag ==0)){
            $newcoord = $coord+$dist;
            $lookup = $chrom." ".$newcoord."_+";
            if ((exists $ss3{$lookup})&&($foundflag==0)){
                print FHout ($lookup." ".$ss3{$lookup}),"\t";
                $foundflag = 1;
            }
            $newcoord = $coord-$dist;
            $lookup = $chrom." ".$newcoord."_+";
            if ((exists $ss3{$lookup})&&($foundflag==0)){
                print FHout ($lookup." ".$ss3{$lookup}),"\t";
            }
        }
    }
}

```

```

        $foundflag = 1;
    }
    $newcoord = $coord+$dist;
    $lookup = $chrom." ".$newcoord."_-";
    if ((exists $ss3 {$lookup})&&($foundflag==0)){
        print FHout ($lookup." ".$ss3 {$lookup}),"\t";
        $foundflag = 1;
    }
    $newcoord = $coord-$dist;
    $lookup = $chrom." ".$newcoord."_-";
    if ((exists $ss3 {$lookup})&&($foundflag==0)){
        print FHout ($lookup." ".$ss3 {$lookup}),"\t";
        $foundflag = 1;
    }
    $dist++;
}}
else {print "error: $lookupkey[$j]\n";}
if ($foundflag ==0){print FHout "null\t";}
}
print FHout "\n";
}
}

```

```

sub sameTranscript {
    $self = shift;
    $group = shift;

    $group =~ /(.)\.txt/;
    $fhout = $self->{_outdir}."/".$1."_filter.txt";
    $fh = $self->{_outdir}."/".$group;
    open (FH, $fh) or die $!;
    open (FHout, ">$fhout") or die $!;

```

```

while (<FH>){
    $line = $_;
    my @ss;
    my @genes;
    if ($_ =~ /chr/){
        for (my $j = 18; $j<=25; $j++){
            push(@ss,((split /\t/, $line)[$j]));
        }
        for (my $j = 0; $j<8; $j++){
            if ($ss[$j] =~ /chr\w+:\d+.\+(.)/){
                $genelist = $1;
            }
        }
    }
}

```

```

        $genes[$j] = $genelist;
    }
    elsif ($ss[$j] =~ /null/) {
        $genes[$j] = "";
    }
}
$headgenes = $genes[0].",".$genes[1].",".$genes[4].",".$genes[5];
$tailgenes = $genes[2].",".$genes[3].",".$genes[6].",".$genes[7];

@headgenes = (split /\,/,$headgenes);
@tailgenes = (split /\,/,$tailgenes);

$numheadgenes = @headgenes;
$numtailgenes = @tailgenes;

$flag = 0;

for (my $j = 0; $j<$numheadgenes; $j++){
    for (my $k = 0; $k<$numtailgenes; $k++){
        if ($headgenes[$j] eq $tailgenes[$k]){
            $flag = 1;
        }
    }
}

if ($flag==1){
    print FHout $line;
}
}
}
close FH;

}

```

```

sub findLariats {
    $self = shift;
    $group = shift;

    $group =~ /(.)\.txt/;
    $fhout = $self->{_outdir}."/".$1."_lariats.txt";
    $fhoutoverlap = $self->{_outdir}."/".$1."_lariats_overlap.txt";
    $fhoutgap = $self->{_outdir}."/".$1."_lariats_gap.txt";
}

```

```

$fh = $self->{_outdir}."/".$group;

open (FH, $fh) or die $!;
open (FHout,">$fhout") or die $!;
open (FHoutoverlap,">$fhoutoverlap") or die $!;
open (FHoutgap, ">$fhoutgap") or die $!;

print "opening: $fh\n\n";

while (<FH>){
    $line = $_;
    chomp $line;
    $seq = (split /\t/, $line)[1];
    $headseq = (split /\t/, $line)[6];
    $tailseq = (split /\t/, $line)[14];
    $readstrand = (split /\t/, $line)[3];
    #exact alignment
    if ((length($seq) == ((length($headseq)+(length($tailseq))))){
        my @ss; my @ss_coord;
        $headcoord1 = (split /\t/, $_)[5];
        $headcoord2 = length($headseq)+$headcoord1;
        $tailcoord1 = (split /\t/, $line)[13];
        $tailcoord2 = length($tailseq)+$tailcoord1;
        for (my $j = 18; $j<=25; $j++){
            push(@ss,((split /\t/, $line)[$j]));
        }
        for (my $j = 0; $j<8; $j++){
            if ($ss[$j] =~ /chr\w+:(\d+)_([+-])/){
                $coord = $1;
                $strand = $2;
                $ss_coord[$j][0] = $coord;
                $ss_coord[$j][1] = $strand;
            }
            else {
                $ss_coord[$j][0] = undef;
                $ss_coord[$j][1] = undef;
            }
        }
        $lariatflag = 0;
        #sense, positive strand
        if (($ss_coord[2][0]==$tailcoord1)&&($ss_coord[2][1] eq $readstrand)&&($readstrand eq
"+")&&($ss_coord[2][1] ne undef)){
            $lariatflag = 1;
        }
        #sense, negative strand

```

```

        if (($ss_coord[3][0]==$tailcoord2)&&($ss_coord[3][1] eq $readstrand)&&($readstrand eq "-"
)&&($ss_coord[3][1] ne undef)){
            $lariatflag = 1;
        }
        #antisense, positive strand
        if (($ss_coord[0][0]==$headcoord1)&&($ss_coord[0][1] ne $readstrand)&&($readstrand eq "-"
)&&($ss_coord[0][1] ne undef)){
            $lariatflag = 1;
        }
        #antisense, negative strand
        if (($ss_coord[1][0]==$headcoord2)&&($ss_coord[1][1] ne $readstrand)&&($readstrand eq
"+")&&($ss_coord[1][1] ne undef)){
            $lariatflag = 1;
        }

        if ($lariatflag==1){
            print FHout $line, "\n";
        }
    }
#overlapped alignment
elsif ((length($seq) < ((length($headseq)+(length($tailseq))))){
    my @ss; my @ss_coord;
    $headcoord1 = (split /\t/, $line)[5];
    $headcoord2 = length($headseq)+$headcoord1;
    $tailcoord1 = (split /\t/, $line)[13];
    $tailcoord2 = length($tailseq)+$tailcoord1;
    $overlap = (length($headseq)+(length($tailseq))-length($seq);
    for (my $j = 18; $j<=25; $j++){
        push(@ss, ((split /\t/, $line)[$j]));
    }
    for (my $j = 0; $j<8; $j++){
        if ($ss[$j] =~ /chr\w+:(\d+)_([+-])/){
            $coord = $1;
            $strand = $2;
            $ss_coord[$j][0] = $coord;
            $ss_coord[$j][1] = $strand;
        }
        else {
            $ss_coord[$j][0] = undef;
            $ss_coord[$j][1] = undef;
        }
    }
    $lariatflag = 0;
    #sense, positive strand
    #if ((abs($ss_coord[2][0]-$tailcoord1)<=$overlap)&&($ss_coord[2][1] eq
$readstrand)&&($readstrand eq "+")&&($ss_coord[2][1] ne undef)){

```



```

        if ((abs($ss_coord[2][0]-
$stailcoord1)<=$overlap)&&($ss_coord[2][0]>=$stailcoord1)&&($ss_coord[2][1] eq
$readstrand)&&($readstrand eq "+")&&($ss_coord[2][1] ne undef)){
            $lariatflag = 1;
        }
        #sense, negative strand
        #if ((abs($ss_coord[3][0]-$stailcoord2)<=$overlap)&&($ss_coord[3][1] eq
$readstrand)&&($readstrand eq "-")&&($ss_coord[3][1] ne undef)){
            if (((-1)*($ss_coord[3][0]-
$stailcoord2)<=$overlap)&&($stailcoord2>=$ss_coord[3][0])&&($ss_coord[3][1] eq
$readstrand)&&($readstrand eq "-")&&($ss_coord[3][1] ne undef)){
                $lariatflag = 1;
            }
        }
        #antisense, positive strand
        #if ((abs($ss_coord[0][0]-$headcoord1)<=$overlap)&&($ss_coord[0][1] ne
$readstrand)&&($readstrand eq "-")&&($ss_coord[0][1] ne undef)){
            if (((($ss_coord[0][0]-$headcoord1)<=$overlap)&&($ss_coord[0][0]
>=$headcoord1)&&($ss_coord[0][1] ne $readstrand)&&($readstrand eq "-")&&($ss_coord[0][1] ne
undef)){
                $lariatflag = 1;
            }
        }
        #antisense, negative strand
        #if ((abs($ss_coord[1][0]-$headcoord2)<=$overlap)&&($ss_coord[1][1] ne
$readstrand)&&($readstrand eq "+")&&($ss_coord[1][1] ne undef)){
            if (((-1)*($ss_coord[1][0]-
$headcoord2)<=$overlap)&&($headcoord2>=$ss_coord[1][0])&&($ss_coord[1][1] ne
$readstrand)&&($readstrand eq "+")&&($ss_coord[1][1] ne undef)){
                $lariatflag = 1;
            }
        }

        if ($lariatflag==1){
            print FHoutoverlap $line,"\\n";
        }
    }
}
#gapped alignment
elsif ((length($seq) > ((length($headseq)+(length($tailseq))))){
    my @ss; my @ss_coord;
    $headcoord1 = (split /\t,$_)[5];
    $headcoord2 = length($headseq)+$headcoord1;
    $stailcoord1 = (split /\t,$line)[13];
    $stailcoord2 = length($tailseq)+$stailcoord1;
    $gap = length($seq)-(length($headseq)+(length($tailseq)));
    for (my $j = 18; $j<=25; $j++){
        push(@ss,((split /\t,$line)[$j]));
    }
    for (my $j = 0; $j<8; $j++){

```

```

    if ($ss[$j] =~ /chr\w+:(\d+)_([+-])/){
        $coord = $1;
        $strand = $2;
        $ss_coord[$j][0] = $coord;
        $ss_coord[$j][1] = $strand;
    }
    else {
        $ss_coord[$j][0] = undef;
        $ss_coord[$j][1] = undef;
    }
}
}
$lariatflag = 0;
#sense, positive strand
if ((abs($ss_coord[2][0]-$tailcoord1)<=$gap)&&($ss_coord[2][1] eq
$readstrand)&&($readstrand eq "+")&&($ss_coord[2][1] ne undef)){
    $lariatflag = 1;
}
#sense, negative strand
if ((abs($ss_coord[3][0]-$tailcoord2)<=$gap)&&($ss_coord[3][1] eq
$readstrand)&&($readstrand eq "-")&&($ss_coord[3][1] ne undef)){
    $lariatflag = 1;
}
#antisense, positive strand
if ((abs($ss_coord[0][0]-$headcoord1)<=$gap)&&($ss_coord[0][1] ne
$readstrand)&&($readstrand eq "-")&&($ss_coord[0][1] ne undef)){
    $lariatflag = 1;
}
#antisense, negative strand
if ((abs($ss_coord[1][0]-$headcoord2)<=$gap)&&($ss_coord[1][1] ne
$readstrand)&&($readstrand eq "+")&&($ss_coord[1][1] ne undef)){
    $lariatflag = 1;
}
}

if ($lariatflag==1){
    print FHoutgap $line, "\n";
}
}

}
close FH; close FHoutoverlap; close FHout; close FHoutgap;

}

sub resolveGaps {
    $self = shift;

```

```

$group = shift;

$group =~ /(.(+).txt/;
$base = $1;
$fhhead = $self->{_outdir}."/".$base."_heads.bed";
$fh tail = $self->{_outdir}."/".$base."_tails.bed";
$fh = $self->{_outdir}."/".$group;

open (FH, $fh) or die $!;
open (FHhead,">$fhhead") or die $!;
open (FHtail,">$fh tail") or die $!;

while (<FH>){
    $line = $_;
    chomp $line;
    $id = (split /\t/, $line)[0];
    $chrom = (split /\t/, $line)[4];
    $seq = (split /\t/, $line)[1];
    $headseq = (split /\t/, $line)[6];
    $tailseq = (split /\t/, $line)[14];
    $readstrand = (split /\t/, $line)[3];

    my @ss; my @ss_coord;
    $headcoord1 = (split /\t/, $_)[5];
    $headcoord2 = length($headseq)+$headcoord1;
    $tailcoord1 = (split /\t/, $line)[13];
    $tailcoord2 = length($tailseq)+$tailcoord1;
    $gap = length($seq)-(length($headseq)+(length($tailseq)));

    for (my $j = 18; $j<=25; $j++){
        push(@ss,((split /\t/, $line)[$j]));
    }
    for (my $j = 0; $j<8; $j++){
        if ($ss[$j] =~ /chr\w+:(\d+)_([+-])/){
            $coord = $1;
            $strand = $2;
            $ss_coord[$j][0] = $coord;
            $ss_coord[$j][1] = $strand;
        }
        else {
            $ss_coord[$j][0] = undef;
            $ss_coord[$j][1] = undef;
        }
    }
}

```

```

#sense, positive strand
if ((abs($ss_coord[2][0]-$tailcoord1)<=$gap)&&($ss_coord[2][1] eq $readstrand)&&($readstrand
eq "+")&&($ss_coord[2][1] ne undef)){
    $dist5ss = $tailcoord1-$ss_coord[2][0];
    if ($dist5ss >= 0){
        $tailcoord1 = $ss_coord[2][0];
        $headcoord2 = $headcoord2+($gap-$dist5ss);
        print FHhead $chrom,"\t",$headcoord1,"\t",$headcoord2,"\t",$id,"\t0\t",$readstrand,"\n";
        print FHtail $chrom,"\t",$tailcoord1,"\t",$tailcoord2,"\t",$id,"\t0\t",$readstrand,"\n";
    }
}

#sense, negative strand
elsif ((abs($ss_coord[3][0]-$tailcoord2)<=$gap)&&($ss_coord[3][1] eq
$readstrand)&&($readstrand eq "-")&&($ss_coord[3][1] ne undef)){
    $dist5ss = $ss_coord[3][0] - $tailcoord2;
    if ($dist5ss >= 0){
        $tailcoord2 = $ss_coord[3][0];
        $headcoord1 = $headcoord1 - ($gap-$dist5ss);
        print FHhead $chrom,"\t",$headcoord1,"\t",$headcoord2,"\t",$id,"\t0\t",$readstrand,"\n";
        print FHtail $chrom,"\t",$tailcoord1,"\t",$tailcoord2,"\t",$id,"\t0\t",$readstrand,"\n";
    }
}

#antisense, positive strand
elsif ((abs($ss_coord[0][0]-$headcoord1)<=$gap)&&($ss_coord[0][1] ne
$readstrand)&&($readstrand eq "-")&&($ss_coord[0][1] ne undef)){
    $dist5ss = $headcoord1-$ss_coord[0][0];
    if ($dist5ss >= 0){
        $headcoord1 = $ss_coord[0][0];
        $tailcoord2 = $tailcoord2+($gap-$dist5ss);
        print FHhead $chrom,"\t",$headcoord1,"\t",$headcoord2,"\t",$id,"\t0\t",$readstrand,"\n";
        print FHtail $chrom,"\t",$tailcoord1,"\t",$tailcoord2,"\t",$id,"\t0\t",$readstrand,"\n";
    }
}

#antisense, negative strand
elsif ((abs($ss_coord[1][0]-$headcoord2)<=$gap)&&($ss_coord[1][1] ne
$readstrand)&&($readstrand eq "+")&&($ss_coord[1][1] ne undef)){
    $dist5ss = $ss_coord[1][0] - $headcoord2;
    if ($dist5ss >= 0){
        $headcoord2 = $ss_coord[1][0];
        $tailcoord1 = $tailcoord1 - ($gap-$dist5ss);
        print FHhead $chrom,"\t",$headcoord1,"\t",$headcoord2,"\t",$id,"\t0\t",$readstrand,"\n";
        print FHtail $chrom,"\t",$tailcoord1,"\t",$tailcoord2,"\t",$id,"\t0\t",$readstrand,"\n";
    }
}
}
}

```

```

close FH; close FHhead; close FHtail;

$command1 = "bedtools getfasta -fi ".$self->{_index}.".fa -bed ".$fhhead." -fo ".$self->{_outdir}."/".$base."_heads.fasta -name -tab -s";
$command2 = "bedtools getfasta -fi ".$self->{_index}.".fa -bed ".$fhtail." -fo ".$self->{_outdir}."/".$base."_tails.fasta -name -tab -s";

print "\n\n$command1\n\n$command2\n\n";

system($command1);
system($command2);

my %gappedreads;
$fhhead =~ s/bed/fasta/;
$fhtail =~ s/bed/fasta/;

print "opening:\t$fhhead\n";
print "opening:\t$fhtail\n";

open (FHhead, $fhhead) or die $!;
open (FHtail, $fhtail) or die $!;
while (<FHhead>){
    ($id,$seq) = (split /\t/,$_);
    chomp $seq;
    $gappedreads{$id}[0] = $seq;
}
while (<FHtail>){
    ($id,$seq) = (split /\t/,$_);
    chomp $seq;
    $gappedreads{$id}[1] = $seq;
}
close FHhead; close FHtail;

open (FH, $fh) or die $!;
$fhout = $self->{_outdir}."/".$base."_truelariats.txt";
open (FHout, ">$fhout") or die $!;

while (<FH>){
    $line = $_;
    chomp $line;

    $id = (split /\t/, $line)[0];
    $seq = (split /\t/, $line)[1];
    $headseq = (split /\t/, $line)[6];
    $tailseq = (split /\t/, $line)[14];
    $headcoord1 = (split /\t/, $_)[5];

```

```
$headcoord2 = length($headseq)+$headcoord1;
$tailcoord1 = (split /\t/, $line)[13];
$tailcoord2 = length($tailseq)+$tailcoord1;
```

```
#####print output file
```

```
if (exists $gappedreads {$Sid}[0]){
    $genomic = $gappedreads {$Sid}[0].$gappedreads {$Sid}[1];
    $stringdist = &levenshtein($seq,$genomic);
    if ($stringdist<=3){
        print FHout $line, "\t", $genomic, "\t", $stringdist, "\n";
    }
}
}
```

```
sub levenshtein
```

```
{
    my ($s1, $s2) = @_ ;
    my ($len1, $len2) = (length $s1, length $s2);

    return $len2 if ($len1 == 0);
    return $len1 if ($len2 == 0);

    my %mat;

    for (my $i = 0; $i <= $len1; ++$i)
    {
        for (my $j = 0; $j <= $len2; ++$j)
        {
            $mat{$i}{$j} = 0;
            $mat{0}{$j} = $j;
        }

        $mat{$i}{0} = $i;
    }

    my @ar1 = split(/,/, $s1);
    my @ar2 = split(/,/, $s2);

    for (my $i = 1; $i <= $len1; ++$i)
```

```

{
  for (my $j = 1; $j <= $len2; ++$j)
  {
    my $cost = ($ar1[$i-1] eq $ar2[$j-1]) ? 0 : 1;

    $mat{$i}{$j} = min([$mat{$i-1}{$j} + 1,
                      $mat{$i}{$j-1} + 1,
                      $mat{$i-1}{$j-1} + $cost]);
  }
}

return $mat{$len1}{$len2};
}

```

```

sub min
{
  my @list = @{$_[0]};
  my $min = $list[0];

  foreach my $i (@list)
  {
    $min = $i if ($i < $min);
  }

  return $min;
}

```

1;

## 2- U2-premRNA alignment motif discovery script:

Run iteratively, after removing sequences that map to discovered motif from each iteration.

```
#Bootstrap_U2snRNA_Aligner.pl
#!/usr/bin/perl

$| = 1;

$trial = 1000;

#bash-3.2$ Bootstrap_u2snRNA_Aligner.pl Foreground(INPUT) Background(INPUT) # of trials
run_num
if ($ARGV[2])
{
    $trial = $ARGV[2];
}

$run_num = $ARGV[3];
my $file = join "_",@ARGV ;
$file =~ tr/\//_/;
my $name = "Bootstrap_run".$file."_output";
open (OUT, ">$name");

my $out1 = "Bootstrap_run".$file."_summary";
open (OUT1, ">$out1");
my $out2 = "Bootstrap_run".$file."_Enrichment_Per_run.distribution";
open (OUT2,>$out2");

# count how many lines of input foreground data lead to how many alignments. How many lines of
background input lead to how many alignments. these will be different #s
foreach my $a (0..1)
{
    open (COM,"wc -l $ARGV[$a]");
    while (<COM>)
    {
        $_ =~ m/(d*)\s*$ARGV[$a]/;
        $filelength[$a] = $1;
    }
}

# loads foreground
open (DATA,"$ARGV[0]");
@fore = (<DATA>);
```



```

#loads background
open (BACK, "$ARGV[1]");
@back = (<BACK>);

#START TRIAL:
foreach my $t (1..$trial)
{
    print "run\t", $run_num, "\ttrial\t", $t, "\n";
    # create two hash tables for each trial which track the number of each type of alignment from
foreground and background
    %back = 0;
    %fore = 0;

# FOREGROUND IS SAMPLED
foreach my $sampled (1 .. $filelength[0])
{
    $sample = $fore[int(rand($filelength[0]))];
    chomp $sample;
    $input = uc $sample;

    %local = ""; # this hash ensures can't report same alignment twice

    foreach my $b (1..3)
    {
        foreach my $a (1..(19 -$b))
        {
            $input =~ m/^(^w{$a})(\w{$b})(\w*)/;
            my $string = $1.$3;
            my $align = $1.(lc $2).$3;

                foreach my $length (0..(14 -$b))
                {
                    if ($string =~ m/^\w{$length}T[G|A][C|T]T[G|A][C|T]/)
                    {

                        my $tag = "";
                        if ($a <= $length)
                        {
                            $length = $length + $b;
                            $tag = "._.$length";
                        }
                    }
                }
            }
        }
    }

```





```

    $enrich[$t][$key] = $fore{$key}/($back{$key}+1);
  }
  %back = 0;
# end of bootstrap, repeat $trial number of times
}

```

### #SUMMARY

```

my @compare = keys %keychain;
foreach my $key (@compare)
{
    my $pval = (int (100000*$exceed{$key}/$trial))/100000;
    unless ($forever{$key})
    {
        $forever{$key} = 0;
    }
    print OUT1 "$key\t$forever{$key}\t$backever{$key}\t$exceed{$key}\t$trial\n";
    #print OUT1 "$key\t$forever{$key}\t$backever{$key}\t". ( (int(100*
($forever{$key}/($backever{$key}+1))))/100) . "\t$pval\n";

    print OUT2 "$key\t";
    foreach my $i (1..$trial)
    {
        print OUT2      "$enrich[$i][$key]\t";

    }

    print OUT2 "\n";

    $y++;
}

print OUT1 " there were $y different types of alignments\n";

```

### 3- U2-premRNA alignment motif matching pipeline:

- 1.) write\_bed.pl
- 2.) sort bed files | uniq (all three bed files)
- 3.) bedtools getfasta -fi /home/annotations/bowtie/hg19/hg19.fa -bed bp\_ds\_TS\_window\_coords\_uniq.bed -fo bp\_ds\_TS\_window\_coords\_uniq\_seq.txt -name -tab -s (all three files: bp\_ds\_TS\_window\_coords, bp\_window\_coords, fivepr\_window\_coords)
- 4.) make\_sequences.pl (format fasta files for patser)
- 5.) make\_pwm\_list.txt and seq\_list.txt for all patser scoring runs
- 6.) run\_patser.pl
- 7.) parse\_patser.pl \*\_scores.txt > all\_scores.txt
- 8.) perl take\_most\_sig\_motif.pl
- 9.) mkdir TS. Copy bp\_ds\_TS\_window\_seq & fivepr\_window\_coords\_seq. mkdir TS/fivepr\_matrices
- 10.) make\_matrices.pl
- 11.) score\_ts.pl

```

#write_bed.pl

use warnings;

$numargs = $#ARGV;
#open (FHout, ">lariats.bed") or die $!;
for (my $j = 0; $j<=$numargs;$j++){

    $file = $ARGV[$j];
    $file =~ /(SRR\d+)/;
    $srr = $1; print $srr,"\n";
    open (FH, $file) or die $!;

    while (<FH>){
        $chrom = (split /\t,$_)[4];
        $strand = (split /\t,$_)[5];
        $fivepr = (split /\t,$_)[6];
        $bp = (split /\t,$_)[8];
        if ($strand eq "+"){
            print $chrom,"\t",$fivepr,"\t",$bp,"\t",$srr,"\t0\t",$strand,"\n";
        }
        elsif ($strand eq "-"){
            print $chrom,"\t",$bp,"\t",$fivepr,"\t",$srr,"\t0\t",$strand,"\n";
        }
    }
    close FH;
}

```

```

#make_sequences.pl

use warnings;

open (FH, $ARGV[0]) or die $!;
$ARGV[0] =~ /(.)\.txt/;
$fhout = $1."_patser.txt";
open (FHout, ">$fhout") or die $!;

while (<FH>){
    ($id,$seq)=(split /\t,$_);
    chomp $seq;
    $seq =~ tr/[a-z]/[A-Z]/;
    print FHout $id,"\t\\",$seq,"\\n";
}

close FH;

```

```
#run_patser.pl
```

```
use warnings;
```

```
open (FH, "pwm_list.txt") or die $!;
```

```
while (<FH>){
```

```
    $pwm = $_; chomp $pwm;
```

```
    open (FH2, "seq_list.txt") or die $!;
```

```
    while (<FH2>){
```

```
        $seq = $_; chomp $seq;
```

```
        $seq =~ /(.)_patser/;
```

```
        $id1 = $1;
```

```
        $pwm =~ /files.(.)_pwm/;
```

```
        $id2 = $1;
```

```
        $outfile = $id1."_"$id2."_scores.txt";
```

```
        $cmd = "patser -m ".$pwm." -f".$seq." -A a:t 1 c:g 1 -s -t -M -100 >".$outfile;
```

```
        print $cmd,"\n";
```

```
        system($cmd);
```

```
    }
```

```
close FH2;
```

```
}
```

```

#parse_patser.pl

use warnings;

my %data;

$numargs = $#ARGV;

for (my $j = 0; $j<=$numargs;$j++){
    $ARGV[$j] =~ /uniq_(.+)_scores.txt/;
    $motif = $1;
    $pos_low = 0; $pos_high = 0;
    if (($motif eq "canonical")||($motif eq "canonicalCbp")){
        $pos_low = 5; $pos_high = 7;
    }
    elsif ($motif eq "2ntbulge"){
        $pos_low = 4; $pos_high = 7;
    }
    elsif ($motif eq "firstTRY_1bulge"){
        $pos_low = 8; $pos_high = 10;
    }
    elsif ($motif eq "firstTRY_2bulge"){
        $pos_low = 7; $pos_high = 10;
    }
    elsif ($motif eq "firstTRY_3bulge"){
        $pos_low = 6; $pos_high = 10;
    }
    #print $category,"\\t",$motif,"\\n";
    open (FH,$ARGV[$j]) or die $!;
    while (<FH>){
        if ($_ =~ /position/){
            if ($_ =~ /^(.+)\s+position\s+=\s+(\d+).\s+score\s+=\s+(-?\d+\.\?\d*)\s+.*value\s+=\s+(-\?\d+\.\?\d*)\s+sequence\s+=\s+([ACGT]+)/){
                $locus = $1;
                $position = $2;
                $score = $3;$lnp = $4;
                $seq = $5;
                if (($position >=$pos_low)&&($position <=$pos_high)){
                    if ((exists $data{$locus} {$motif})&&($data{$locus} {$motif} =~ /\d+/)){
                        $score2 = (split /\t/, $data{$locus} {$motif})[2];
                        if ($score > $score2){
                            $data{$locus} {$motif} =
$position."\\t".$seq."\\t".$score."\\t".$lnp;
                        }
                    }
                }
            }
        }
    }
}
else {

```





```
#take_most_sig_motif.pl
```

```
use warnings;
```

```
open (FH, "all_scores.txt") or die $!;
```

```
while (<FH>){
```

```
  if ($_ =~ /chr\w+/){
```

```
    $loci = (split /\t/, $_)[0];
```

```
    $canonical_startpos = (split /\t/, $_)[1];
```

```
    $canonical_seq = (split /\t/, $_)[2];
```

```
    $canonical_lnp = (split /\t/, $_)[4];
```

```
    unless ($canonical_lnp =~ /\d/){$canonical_lnp = 10;}
```

```
    $canonicalC_startpos = (split /\t/, $_)[5];
```

```
    $canonicalC_seq = (split /\t/, $_)[6];
```

```
    $canonicalC_lnp = (split /\t/, $_)[8];
```

```
    unless ($canonicalC_lnp =~ /\d/){$canonicalC_lnp = 10;}
```

```
    $canonical2nt_startpos = (split /\t/, $_)[9];
```

```
    $canonical2nt_seq = (split /\t/, $_)[10];
```

```
    $canonical2nt_lnp = (split /\t/, $_)[12];
```

```
    unless ($canonical2nt_lnp =~ /\d/){$canonical2nt_lnp = 10;}
```

```
    $STRAYTRY_startpos = (split /\t/, $_)[13];
```

```
    $STRAYTRY_seq = (split /\t/, $_)[14];
```

```
    $STRAYTRY_lnp = (split /\t/, $_)[16];
```

```
    unless ($STRAYTRY_lnp =~ /\d/){$STRAYTRY_lnp = 10;}
```

```
    $STRANYTRY_startpos = (split /\t/, $_)[17];
```

```
    $STRANYTRY_seq = (split /\t/, $_)[18];
```

```
    $STRANYTRY_lnp = (split /\t/, $_)[20];
```

```
    unless ($STRANYTRY_lnp =~ /\d/){$STRANYTRY_lnp = 10;}
```

```
    $STRANNYTRY_startpos = (split /\t/, $_)[21];
```

```
    $STRANNYTRY_seq = (split /\t/, $_)[22];
```

```
    $STRANNYTRY_lnp = (split /\t/, $_)[24]; chomp $STRANNYTRY_lnp;
```

```
    unless ($STRANNYTRY_lnp =~ /\d/){$STRANNYTRY_lnp = 10;}
```

```
$min_lnp = -3.912; #p-val < .02
```

```
print $loci;
```

```
if (($canonical_lnp < $min_lnp)||($canonicalC_lnp < $min_lnp)||($canonical2nt_lnp < $min_lnp)||($STRAYTRY_lnp < $min_lnp)||($STRANYTRY_lnp < $min_lnp)||($STRANNYTRY_lnp < $min_lnp)){
```

```
  my $flag = 0;
```



```

#make_matrices.pl

use warnings;
open (FH, "fivepr_window_coords_seq_uniq.txt") or die $!;
while (<FH>){
    ($id,$seq)=(split /\t,$_); chomp $seq;
    $seq =~ tr/[a-z]/[A-Z]/;
    $fhout = "./fivepr_matrices/" . $id . ".txt";
    open (FHout, ">$fhout") or die $!;
    my @s;
    $seq =~ /(\w)(\w)(\w)(\w)(\w)(\w)/;
    $s[0] = $1; $s[1] = $2; $s[2] = $3;
    $s[3] = $4; $s[4] = $5; $s[5] = $6;
    #A
    print FHout "A";
    for (my $j = 0;$j<6;$j++){
        if ($s[$j] eq "A"){print FHout "\t1";}
        else {print FHout "\t0";}
    }
    print FHout "\n";
    #C
    print FHout "C";
    for (my $j = 0;$j<6;$j++){
        if ($s[$j] eq "C"){print FHout "\t1";}
        else {print FHout "\t0";}
    }
    print FHout "\n";
    #G
    print FHout "G";
    for (my $j = 0;$j<6;$j++){
        if ($s[$j] eq "G"){print FHout "\t1";}
        else {print FHout "\t0";}
    }
    print FHout "\n";
    #T
    print FHout "T";
    for (my $j = 0;$j<6;$j++){
        if ($s[$j] eq "T"){print FHout "\t1";}
        else {print FHout "\t0";}
    }
    print FHout "\n";
    print FHout "N";
    for (my $j = 0;$j<6;$j++){
        if ($s[$j] eq "N"){print FHout "\t1";}
        else {print FHout "\t0";}
    }
}

```

```

    }
    print FHout "\n";
    close FHout;
}

```

#score\_ts.pl

use warnings;

```

open (FH,"bp_ds_TS_window_coords_seq_uniq.txt") or die $!;
open (FHscores,">TS_scores_all.txt") or die $!;
while (<FH>){
    ($id,$seq)=(split /\t,$_); chomp $seq; $seq =~ tr/[a-z]/[A-Z]/;
    $matrix = "/fivepr_matrices/" . $id . ".txt";
    open (FHout,">temp_seq.txt") or die $!;
    print FHout "seq \\\", $seq, "\\\";
    close FHout;
    $cmd = "patser -m ".$matrix." -A a 2612 c 2268 t 2577 g 2543 n 0.03 -s -M -1000 <
temp_seq.txt";
    $output = ` $cmd `;
    if ($output =~ /score\=\s+(\-?\d+[[[:punct:]]?\d*).\+value\)\=\s+(\-
?\d+\.\d*)\s+sequence\=\s*([ACGTNacgtn]+)/){
        print FHscores $id, "\t", $1, "\t", $2, "\t", $3, "\n";
    }
    else {
        print "error: $id, \n";
        print $output, "\n\n\n\n";
    }
}
}

```

Branchpoint Motif Matrices- derived from discovered motifs, formatted for patser scoring:

canonical\_pwm.txt

|   |     |     |     |     |     |     |     |  |  |
|---|-----|-----|-----|-----|-----|-----|-----|--|--|
| A | 0   | 195 | 1   | 1   | 131 | 562 | 0   |  |  |
| C | 0   | 0   | 575 | 0   | 141 | 0   | 399 |  |  |
| G | 0   | 492 | 0   | 0   | 341 | 21  | 0   |  |  |
| T | 774 | 0   | 199 | 774 | 136 | 0   | 375 |  |  |

canonicalCbp\_pwm.txt

|   |     |    |    |     |    |     |     |  |  |
|---|-----|----|----|-----|----|-----|-----|--|--|
| A | 0   | 30 | 0  | 0   | 25 | 0   | 3   |  |  |
| C | 0   | 0  | 95 | 0   | 0  | 107 | 107 |  |  |
| G | 0   | 85 | 0  | 0   | 90 | 0   | 1   |  |  |
| T | 115 | 0  | 20 | 115 | 0  | 8   | 4   |  |  |

2ntbulge\_pwm.txt

|   |    |    |    |    |    |    |    |    |  |
|---|----|----|----|----|----|----|----|----|--|
| A | 0  | 34 | 0  | 0  | 15 | 72 | 42 | 0  |  |
| C | 0  | 0  | 86 | 0  | 25 | 2  | 0  | 46 |  |
| G | 0  | 65 | 0  | 0  | 53 | 2  | 57 | 0  |  |
| T | 99 | 0  | 13 | 99 | 6  | 23 | 0  | 53 |  |

firstTRY\_1bulge\_pwm.txt

|   |     |     |     |     |     |     |     |  |  |
|---|-----|-----|-----|-----|-----|-----|-----|--|--|
| A | 0   | 65  | 128 | 0   | 0   | 54  | 0   |  |  |
| C | 0   | 0   | 27  | 117 | 0   | 0   | 52  |  |  |
| G | 0   | 113 | 2   | 0   | 0   | 124 | 0   |  |  |
| T | 178 | 0   | 21  | 61  | 178 | 0   | 126 |  |  |

firstTRY\_2bulge\_pwm.txt

|   |     |    |     |    |    |     |     |     |  |
|---|-----|----|-----|----|----|-----|-----|-----|--|
| A | 0   | 51 | 104 | 24 | 0  | 0   | 42  | 0   |  |
| C | 0   | 0  | 18  | 51 | 80 | 0   | 0   | 42  |  |
| G | 0   | 92 | 5   | 31 | 0  | 0   | 101 | 0   |  |
| T | 143 | 0  | 16  | 37 | 63 | 143 | 0   | 101 |  |

firstTRY\_3bulge\_pwm.txt

|   |     |     |     |    |    |     |     |     |     |
|---|-----|-----|-----|----|----|-----|-----|-----|-----|
| A | 0   | 70  | 160 | 31 | 43 | 0   | 0   | 63  | 0   |
| C | 0   | 0   | 23  | 83 | 49 | 83  | 0   | 0   | 64  |
| G | 0   | 131 | 5   | 25 | 34 | 0   | 0   | 138 | 0   |
| T | 201 | 0   | 13  | 62 | 75 | 118 | 201 | 0   | 137 |

#### 4- Formatting lariat excel tables:

- 1.) copy TS\_scores\_all.txt and most\_sig\_motif.txt to lariat\_table directory. cp hg19\_introns or mm9\_introns to lariat\_table\_directory.
- 2.) cat SR\*/lariat\_data\_table.txt > StudyID\_lariat\_data\_table.txt
- 3.) ~/read\_seq/map\_mutation.pl Study\_lariat\_data\_table.txt
- 4.) make\_bed\_files.pl lariat\_data\_table\_wReadSeq.txt
- 5.) cut -f5-9 \*\_lariat\_data\_table\_wReadSeq.txt | sort | uniq > all\_coords\_uniq.txt
- 6.) perl ../make\_circle\_bed.pl all\_coords\_uniq.txt > circle.bed
- 7.) perl ../make\_TS.bed > TS.bed
- 8.) perl get\_human\_table1.pl > BPs\_apparent\_real\_wFoundFiles\_final.txt
- 9.) perl make\_table\_1.pl > BP\_table\_1\_final.txt
- 10.) perl make\_BP\_table2.pl > BP\_table\_2\_final.txt
- 11.) perl assign\_3ss\_and\_category.pl BP\_table\_2\_final.txt > BP\_table\_3\_final.txt
- 12.) perl make\_table\_4.pl > BP\_table\_4\_final.txt
- 13.) perl make\_table\_5.pl

```

#map_mutation.pl

use warnings;

$ARGV[0] =~ /(.)\.txt/;
$fileout = $1."_wReadSeq.txt";
$base = $1;

open (FHout,">$fileout") or die $!;
open (FH, "$ARGV[0]") or die $!;

while (<FH>){
    $line = $_; chomp $line;
    $seq = (split /\t/,$_)[3];
    $chr = (split /\t/,$_)[4];
    $strand = (split /\t/,$_)[5];
    $fivepr = (split /\t/,$_)[6];
    $bp = (split /\t/,$_)[8];
    $bpseq = (split /\t/,$_)[9]; chomp $bpseq;
    $refstart = ""; $refend = "";
    $genomic = "";
    if ($strand eq "+"){

        $refstart = $bp-100;
        $refend = $fivepr+100;
        $fhbed = $base."_temp.bed";
        open (FHbed,">$fhbed") or die $!;
        print FHbed $chr,"\t",$refstart,"\t",$bp,"\thead\t0\t+\n";
        print FHbed $chr,"\t",$fivepr,"\t",$refend,"\ttail\t0\t+\n";
        close FHbed;

        $cmd = "bedtools getfasta -fi /home/annotations/bowtie/hg19/hg19.fa -tab -s -name -bed
.$fhbed." -fo ".$base."_tempseq.txt";
        system($cmd);
        $fhseq = $base."_tempseq.txt";
        open (FHseq,"$fhseq") or die $!;
        while (<FHseq>){
            if ($_ =~ /head/){
                $headseq = (split /\t/,$_)[1]; chomp $headseq;
            }
            if ($_ =~ /tail/){
                $tailseq = (split /\t/,$_)[1]; chomp $tailseq;
            }
        }
        close FHseq;
        $cmd = "rm ".$fhbed." ".$fhseq;
    }
}

```



```

system($cmd);

$genomic = $headseq.$tailseq;

}

if ($strand eq "-"){

    $refstart = $bp+100;
    $refend = $fivepr-100;
    $fhbed = $base."_temp.bed";
    open (FHbed,">$fhbed") or die $!;
    print FHbed $chr,"\t",$bp,"\t",$refstart,"\thead\t0\t-\n";
    print FHbed $chr,"\t",$refend,"\t",$fivepr,"\ttail\t0\t-\n";
    close FHbed;

    $cmd = "bedtools getfasta -fi /home/annotations/bowtie/hg19/hg19.fa -tab -s -name -bed
    ".$fhbed." -fo ".$base."_tempseq.txt";
    system($cmd);
    $fhseq = $base."_tempseq.txt";
    open (FHseq,"$fhseq") or die $!;
    while (<FHseq>){
        if ($_ =~ /head/){
            $headseq = (split /\t,$_)[1]; chomp $headseq;
        }
        if ($_ =~ /tail/){
            $tailseq = (split /\t,$_)[1]; chomp $tailseq;
        }
    }
    close FHseq;
    $cmd = "rm ".$fhbed." ".$fhseq;
    system($cmd);

    $genomic = $headseq.$tailseq;
}

$seq =~ tr/[a-z]/[A-Z]/;
$genomic =~ tr/[a-z]/[A-Z]/;

$seq_forward = $seq;

$len = length($seq_forward);
$flag = 0;
my %levdist; $mini = 100;
for (my $j = 0; $j<=(200-$len);$j++){

```

```

$gen_substr = substr($genomic,$j,$len);
$stringdist = &levenshtein($seq_forward,$gen_substr);
if ($stringdist <=3){
    $levdist{$stringdist}=$j;
    $flag = 1;
    if ($stringdist<$mini){$mini = $stringdist;}
}
}
if ($flag==1){
    $j = $levdist{$mini};
    $i = 100-$j-5;
    $seqsubstr = substr($seq_forward,$i,10);
    print FHout $line,"\t",$seq_forward,"\t",$seqsubstr,"\t",$bpseq,"\n";
}

if ($flag==0){
    $seq_forward = reverse $seq; $seq_forward =~ tr/ACGT/TGCA/;
    for (my $j = 0; $j<=(200-$len);$j++){
        $gen_substr = substr($genomic,$j,$len);
        $stringdist = &levenshtein($seq_forward,$gen_substr);
        if ($stringdist <=3){
            $levdist{$stringdist}=$j;
            if ($stringdist<$mini){$mini=$stringdist;}
            $flag = 1;
        }
    }
    if ($flag==1){
        $j = $levdist{$mini};
        $i = 100-$j-5;
        $seqsubstr = substr($seq_forward,$i,10);
        print FHout $line,"\t",$seq_forward,"\t",$seqsubstr,"\t",$bpseq,"\n";
    }
}

if ($flag==0){
    print FHout "error\t: $line\n";
}
}

```

```

sub levenshtein

```

```

{
    my ($s1, $s2) = @_;
    my ($len1, $len2) = (length $s1, length $s2);

```

```
return $len2 if ($len1 == 0);
return $len1 if ($len2 == 0);
```

```
my %mat;
```

```
for (my $i = 0; $i <= $len1; ++$i)
{
    for (my $j = 0; $j <= $len2; ++$j)
    {
        $mat{$i}{$j} = 0;
        $mat{0}{$j} = $j;
    }

    $mat{$i}{0} = $i;
}
```

```
my @ar1 = split(/, $s1);
my @ar2 = split(/, $s2);
```

```
for (my $i = 1; $i <= $len1; ++$i)
{
    for (my $j = 1; $j <= $len2; ++$j)
    {
        my $cost = ($ar1[$i-1] eq $ar2[$j-1]) ? 0 : 1;

        $mat{$i}{$j} = min([$mat{$i-1}{$j} + 1,
            $mat{$i}{$j-1} + 1,
            $mat{$i-1}{$j-1} + $cost]);
    }
}
```

```
return $mat{$len1}{$len2};
}
```

```
sub min
```

```
{
    my @list = @{$_[0]};
    my $min = $list[0];

    foreach my $i (@list)
    {
        $min = $i if ($i < $min);
    }

    return $min;
}
```

```

#make_bed_files.pl

#output:
###bed file for all reads
###bed file for uniq reads
###bed file for mismatch at BP all reads
###bed file for mismatch at BP uniq reads

use warnings;

my %read;
my %read_BPmismatch;

open (FHallreads,">all_reads.bed") or die $!;
open (FHallreadsmut,">all_reads_BPmismatch.bed") or die $!;
#read in lariat_data_table_wReadseq.txt
open (FH, "$ARGV[0]") or die $!;
while (<FH>){
    $readid = (split /\t/,$_)[2];
    $readid =~ /(SRR\d+)/;
    $srr = $1;
    $read = (split /\t/,$_)[3];
    $chrom = (split /\t/,$_)[4];
    $strand = (split /\t/,$_)[5];
    $fivepr = (split /\t/,$_)[6];
    $bp = (split /\t/,$_)[8];
    $readseq = (split /\t/,$_)[11]; $genseq = (split /\t/,$_)[12]; chomp $genseq;
    $readseq =~ /^....(.) /;
    $readBP = $1;
    $genseq =~ /^....(.) /;
    $genBP = $1;
    $mut = 0;
    if ($readBP ne $genBP){$mut = 1;}
    $bedline = "";
    if ($strand eq "+"){
        $bedline = $chrom."\t".$fivepr."\t".$bp."\t".$srr."\t0\t+\n";
    }
    elsif ($strand eq "-"){
        $bedline = $chrom."\t".$bp."\t".$fivepr."\t".$srr."\t0\t-\n";
    }
    }
print FHallreads $bedline;
if ($mut ==1){
    print FHallreadsmut $bedline;
}
}
$id = $srr."\t".$read;
$read{$id}=$bedline;

```

```
    if ($mut==1){
        $read_BPmismatch{$Sid}=$bedline;
    }
}
close FH;
```

```
open (FHuniqreads,">uniq_reads.bed") or die $!;
open (FHuniqreadsmut,">uniq_reads_BPmismatch.bed") or die $!;
```

```
foreach my $r (keys %read){
    print FHuniqreads $read{$r};
}
foreach my $r (keys %read_BPmismatch){
    print FHuniqreadsmut $read_BPmismatch{$r};
}
```

```

#make_circle_bed.pl

use warnings;
#read in uniq coords, chrom strand fivepr threepr bp
open (FH, $ARGV[0]) or die $!;

my %circle;

while (<FH>){
    ($chrom,$strand,$fivepr,$threepr,$bp)=(split /\t/,$_); chomp $bp;
    if ($threepr =~ /\d/){
        if ($threepr == $bp){
            if ($strand eq "+"){
                print $chrom,"\t",$fivepr,"\t",$threepr,"\tcircle\t0\t+\n";
            }
            elsif ($strand eq "-"){
                print $chrom,"\t",$threepr,"\t",$fivepr,"\tcircle\t0\t-\n";
            }
        }
    }
}
close FH;

```

```

#make_TS_bed.pl

use warnings;

open (FH, "TS_scores_all.txt") or die $!;

while (<FH>){
    ($event,$score,$lnp,$seq)=(split /\t/,$_);
    chomp $seq;
    $event =~ /(chr\w+)\:(\d+)\_(\d+)\_([+-])/;
    $chrom = $1; $fivepr = $2; $threepr = $3; $strand = $4;
    $min_lnp = -3.912; #pval<.02
    if ($lnp<=$min_lnp){
        if ($strand eq "+"){
            print $chrom,"\t",$fivepr,"\t",$threepr,"\tTS\t0\t+\n";
        }
        elsif ($strand eq "-"){
            print $chrom,"\t",$threepr,"\t",$fivepr,"\tTS\t0\t-\n";
        }
    }
}
close FH;

```

```

#get_human_table1.pl

use warnings;

my %lariats;
my %lariat_file;

my %lariat_file_uniq;
open (FH, "all_reads.bed") or die $!;
while (<FH>){
    $file = "";
    if ($_ =~ /(Mattick\(\SRR\d+\))/){
        $file = $1;
    }
    elsif ($_ =~ /(SRR\d+)/){
        $file = $1;
    }
    elsif ($_ =~ /(fairbrother_wt)/){
        $file = $1;
    }
    elsif ($_ =~ /(fairbrother_K700E)/){
        $file = $1;
    }
    else {print "error: $_\n";}

    ($chrom,$start,$end,$id,$score,$strand)=(split /\t,$_); chomp $strand;
    $bp = "";
    if ($strand eq "+"){ $bp = $end;}
    if ($strand eq "-"){ $bp = $start;}
    $idnew = $chrom.".".$bp."_".$strand; $idnew =~ s/\s//g;
    #print $idnew,"\n";
    if (exists $lariat_file{$idnew} {$file}){$lariat_file{$idnew} {$file}++;}
    else {$lariat_file{$idnew} {$file}=1;}
}
close FH;

open (FH, "uniq_reads.bed") or die $!;

while (<FH>){
    $file = "";
    if ($_ =~ /(Mattick\(\SRR\d+\))/){
        $file = $1;
    }
    elsif ($_ =~ /(SRR\d+)/){

```

```

        $file = $1;
    }
    elsif ($_ =~ /(fairbrother_wt)/){
        $file = $1;
    }
    elsif ($_ =~ /(fairbrother_K700E)/){
        $file = $1;
    }
    else {print "error: $_\n";}

    ($chrom,$start,$end,$id,$score,$strand)=(split /\t,$_); chomp $strand;
    $bp = "";
    if ($strand eq "+"){ $bp = $end;}
    if ($strand eq "-"){ $bp = $start;}
    $idnew = $chrom.".".$bp."_".$strand; $idnew =~ s/\s//g;
    #print $idnew,"\n";
    if (exists $lariat_file_uniq{$idnew} {$file}){$lariat_file_uniq{$idnew} {$file}++;}
    else {$lariat_file_uniq{$idnew} {$file}=1;}
}
close FH;

my %lariat_file_mut;
open (FH, "all_reads_BPmismatch.bed") or die $!;
while (<FH>){
    $file = "";
    if ($_ =~ /(Mattick\(\SRR\d+\))/){
        $file = $1;
    }
    elsif ($_ =~ /(SRR\d+)/){
        $file = $1;
    }
    }
    elsif ($_ =~ /(fairbrother_wt)/){
        $file = $1;
    }
    }
    elsif ($_ =~ /(fairbrother_K700E)/){
        $file = $1;
    }
    }
    else {print "error: $_\n";}

    ($chrom,$start,$end,$id,$score,$strand)=(split /\t,$_); chomp $strand;
    $bp = "";
    if ($strand eq "+"){ $bp = $end;}
    if ($strand eq "-"){ $bp = $start;}
    $idnew = $chrom.".".$bp."_".$strand; $idnew =~ s/\s//g;
    #print $idnew,"\n";
    if (exists $lariat_file_mut{$idnew} {$file}){$lariat_file_mut{$idnew} {$file}++;}

```



```

        else {$lariat_file_mut{$Sidnew} {$file}=1;}
    }
close FH;

my %lariat_file_mut_uniq;
open (FH, "uniq_reads_BPmismatch.bed") or die $!;
while (<FH>){
    $file = "";
    if ($_ =~ /(Mattick\(\SRR\d+\))/){
        $file = $1;
    }
    elsif ($_ =~ /(SRR\d+)/){
        $file = $1;
    }
    elsif ($_ =~ /(fairbrother_wt)/){
        $file = $1;
    }
    elsif ($_ =~ /(fairbrother_K700E)/){
        $file = $1;
    }
    else {print "error: $_\n";}

    ($chrom,$start,$end,$id,$score,$strand)=(split /\t,$_); chomp $strand;
    $bp = "";
    if ($strand eq "+"){ $bp = $end;}
    if ($strand eq "-"){ $bp = $start;}
    $idnew = $chrom.".".$bp."_".$strand; $idnew =~ s/\s//g;
    #print $idnew,"\n";
    if (exists $lariat_file_mut_uniq{$idnew} {$file}){$lariat_file_mut_uniq{$idnew} {$file}++;}
    else {$lariat_file_mut_uniq{$idnew} {$file}=1;}
}
close FH;

```

```

open (FH,"most_sig_motif.txt") or die $!;
while (<FH>){
    $line = $_; $line =~ s/^\s+//;
    $id = (split /\t,$line)[0]; $motif = (split /\t,$line)[1]; chomp $motif;
    $id =~ s/\s//g;
    $id =~ /(\w+):(\d+)_([+-])/;
    $chrom = $1; $bp_apparent = $2; $strand = $3;
    $id2 = $chrom.".".$bp_apparent."_".$strand;
    if ($motif eq "none"){

```

```

    $lariats{$id2} {"motif"} = "none";
    $lariats{$id2} {"bp_real"} = "null";
    $lariats{$id2} {"bp_seq"} = "null";
}
else {
    $pos = (split /\t/, $line)[2]; $seq = (split /\t/, $_)[3];
    $lariats{$id2} {"motif"} = $motif;
    if (($strand eq "+") && (($motif eq "canonical") || ($motif eq "canonicalC"))){
        $real_bp = ($pos-5) + $bp_apparent;
        $lariats{$id2} {"bp_real"} = $real_bp;
        $lariats{$id2} {"bp_seq"} = $seq;
    }
    elseif (($strand eq "-") && (($motif eq "canonical") || ($motif eq "canonicalC"))){
        $real_bp = $bp_apparent - ($pos-5);
        $lariats{$id2} {"bp_real"} = $real_bp;
        $lariats{$id2} {"bp_seq"} = $seq;
    }
    elseif (($strand eq "+") && (($motif eq "canonical2nt"))){
        $real_bp = ($pos-4) + $bp_apparent;
        $lariats{$id2} {"bp_real"} = $real_bp;
        $lariats{$id2} {"bp_seq"} = $seq;
    }
    elseif (($strand eq "-") && (($motif eq "canonical2nt"))){
        $real_bp = $bp_apparent - ($pos-4);
        $lariats{$id2} {"bp_real"} = $real_bp;
        $lariats{$id2} {"bp_seq"} = $seq;
    }
    elseif (($strand eq "+") && (($motif eq "TRAYTRY"))){
        $real_bp = ($pos-8) + $bp_apparent;
        $lariats{$id2} {"bp_real"} = $real_bp;
        $lariats{$id2} {"bp_seq"} = $seq;
    }
    elseif (($strand eq "-") && (($motif eq "TRAYTRY"))){
        $real_bp = $bp_apparent - ($pos-8);
        $lariats{$id2} {"bp_real"} = $real_bp;
        $lariats{$id2} {"bp_seq"} = $seq;
    }
    elseif (($strand eq "+") && (($motif eq "TRANYTRY"))){
        $real_bp = ($pos-7) + $bp_apparent;
        $lariats{$id2} {"bp_real"} = $real_bp;
        $lariats{$id2} {"bp_seq"} = $seq;
    }
    elseif (($strand eq "-") && (($motif eq "TRANYTRY"))){
        $real_bp = $bp_apparent - ($pos-7);
        $lariats{$id2} {"bp_real"} = $real_bp;
        $lariats{$id2} {"bp_seq"} = $seq;
    }
}

```

```

    }
    elsif (($strand eq "+")&&(($motif eq "TRANNYTRY"))){
        $real_bp = ($pos-6)+$bp_apparent;
        $lariats{$id2}{"bp_real"} = $real_bp;
        $lariats{$id2}{"bp_seq"} = $seq;
    }
    elsif (($strand eq "-")&&(($motif eq "TRANNYTRY"))){
        $real_bp = $bp_apparent - ($pos-6);
        $lariats{$id2}{"bp_real"} = $real_bp;
        $lariats{$id2}{"bp_seq"} = $seq;
    }
}
}
}

```

```

open (FH, "circle.bed") or die $!;
while (<FH>){
    ($chrom,$c1,$c2,$circ,$score,$strand)=(split /\t/,$_); chomp $strand;
    $bp = "";
    if ($strand eq "+"){ $bp = $c2;}
    elsif ($strand eq "-"){ $bp = $c1;}
    $id = $chrom.".".$bp."_"."$strand;
    if (exists $lariats{$id}{"motif"}){
        $lariats{$id}{"motif"}="circle";
        $lariats{$id}{"bp_real"} = "null";
        $lariats{$id}{"bp_seq"} = "null";
    }
    else {print "error: $id\n";}
}
}

```

```

open (FH, "TS.bed") or die $!;
while (<FH>){
    ($chrom,$c1,$c2,$TTS,$score,$strand)=(split /\t/,$_); chomp $strand;
    $bp = "";
    if ($strand eq "+"){ $bp = $c2;}
    elsif ($strand eq "-"){ $bp = $c1;}
    $id = $chrom.".".$bp."_"."$strand;
    if (exists $lariats{$id}{"motif"}){
        $lariats{$id}{"motif"}="template_switching";
        $lariats{$id}{"bp_real"} = "null";
        $lariats{$id}{"bp_seq"} = "null";
    }
    else {print "error: $id\n";}
}
}

```

```

foreach my $key (keys %lariats){
    $found = ""; $total_reads = 0; $uniq_reads = 0; $mismatch_reads = 0; $mismatch_uniq_reads = 0;
    foreach my $key2 (keys %{$lariat_file{$key}}){
        $total_reads = $total_reads + $lariat_file{$key}{$key2};
        if (exists $lariat_file_uniq{$key}{$key2}){$uniq_reads =
$uniq_reads+$lariat_file_uniq{$key}{$key2};}
        else {$lariat_file_uniq{$key}{$key2}=0;}
        if (exists $lariat_file_mut{$key}{$key2}){$mismatch_reads =
$mismatch_reads+$lariat_file_mut{$key}{$key2};}
        else {$lariat_file_mut{$key}{$key2}=0;}
        if (exists $lariat_file_mut_uniq{$key}{$key2}){$mismatch_uniq_reads =
$mismatch_uniq_reads+$lariat_file_mut_uniq{$key}{$key2};}
        else {$lariat_file_mut_uniq{$key}{$key2}=0;}
        $nextkey = $key2."("$lariat_file{$key}{$key2}.";".lariat_file_uniq{$key}{$key2}.);";
        $found = $found.$nextkey."";
    }
    if ($found =~ /SRR/){
        print
$key, "\t", $lariats{$key} {"motif"}, "\t", $lariats{$key} {"bp_real"}, "\t", $lariats{$key} {"bp_seq"}, "\t", $found, "\t", $total_reads, "\t", $uniq_reads, "\t", $mismatch_reads, "\t", $mismatch_uniq_reads, "\n";
    }
}

```

```

#make_table_1.pl

use warnings;

open (FH,"BPs_apparent_real_wFoundFiles_final.txt") or die $!;

my %branchpoint;

while (<FH>){
    ($app,$motif,$real,$seq,$found,$numreads,$uniqreads,$mutreads,$mutuniqreads)=(split /\t/,$_);
    chomp $mutuniqreads;
    $app =~ /(\w+):(\d+)_([+-])/;
    $chrom = $1; $appnt = $2; $strand = $3;
    unless ($real eq "null"){
        $dist = abs($appnt-$real);}
    else {
        $dist = 0; $real = $appnt;
    }
    $id = $chrom."\t".$real."\t".$strand."\t".$motif;
    @list = (split /\./,$found);

    if (exists $branchpoint{$id} {"read"} {$dist}){
        $branchpoint{$id} {"read"} {$dist}=$branchpoint{$id} {"read"} {$dist}+$numreads;
    }
    else {$branchpoint{$id} {"read"} {$dist}=$numreads;}

    if (exists $branchpoint{$id} {"readuniq"} {$dist}){
        $branchpoint{$id} {"readuniq"} {$dist}=$branchpoint{$id} {"readuniq"} {$dist}+$uniqreads;
    }
    else {$branchpoint{$id} {"readuniq"} {$dist}=$uniqreads;}

    if (exists $branchpoint{$id} {"mutread"} {$dist}){
        $branchpoint{$id} {"mutread"} {$dist}=$branchpoint{$id} {"mutread"} {$dist}+$mutreads;
    }
    else {$branchpoint{$id} {"mutread"} {$dist}=$mutreads;}

    if (exists $branchpoint{$id} {"mutreaduniq"} {$dist}){
        $branchpoint{$id} {"mutreaduniq"} {$dist}=$branchpoint{$id} {"mutreaduniq"} {$dist}+$mutuniqreads;
    }
    else {$branchpoint{$id} {"mutreaduniq"} {$dist}=$mutuniqreads;}

    foreach $a (@list){
        if ($a =~ /\w+/){
            $a =~ /(.)\((\d+)\);(\d+)\)/;
            $one = $1; $two = $2; $three = $3;
            $anew = $one."(".$appnt.";".$two.";".$three.)";
        }
    }
}

```

```

        $branchpoint{$id} {"found"} {$anew}=1;
    }
}
$branchpoint{$id} {"seq"}=$seq;
}

foreach my $bp (keys %branchpoint){
    print $bp,"\t",$branchpoint{$bp} {"seq"},"\t";
    if (exists $branchpoint{$bp} {"read"} {5}) {print $branchpoint{$bp} {"read"} {5},",,";}
    else {print "0,";}
    if (exists $branchpoint{$bp} {"read"} {4}) {print $branchpoint{$bp} {"read"} {4},",,";}
    else {print "0,";}
    if (exists $branchpoint{$bp} {"read"} {3}) {print $branchpoint{$bp} {"read"} {3},",,";}
    else {print "0,";}
    if (exists $branchpoint{$bp} {"read"} {2}) {print $branchpoint{$bp} {"read"} {2},",,";}
    else {print "0,";}
    if (exists $branchpoint{$bp} {"read"} {1}) {print $branchpoint{$bp} {"read"} {1},",,";}
    else {print "0,";}
    if (exists $branchpoint{$bp} {"read"} {0}) {print $branchpoint{$bp} {"read"} {0},"\t";}
    else {print "0\t";}

    if (exists $branchpoint{$bp} {"readuniq"} {5}) {print $branchpoint{$bp} {"readuniq"} {5},",,";}
    else {print "0,";}
    if (exists $branchpoint{$bp} {"readuniq"} {4}) {print $branchpoint{$bp} {"readuniq"} {4},",,";}
    else {print "0,";}
    if (exists $branchpoint{$bp} {"readuniq"} {3}) {print $branchpoint{$bp} {"readuniq"} {3},",,";}
    else {print "0,";}
    if (exists $branchpoint{$bp} {"readuniq"} {2}) {print $branchpoint{$bp} {"readuniq"} {2},",,";}
    else {print "0,";}
    if (exists $branchpoint{$bp} {"readuniq"} {1}) {print $branchpoint{$bp} {"readuniq"} {1},",,";}
    else {print "0,";}
    if (exists $branchpoint{$bp} {"readuniq"} {0}) {print $branchpoint{$bp} {"readuniq"} {0},"\t";}
    else {print "0\t";}

    if (exists $branchpoint{$bp} {"mutread"} {5}) {print $branchpoint{$bp} {"mutread"} {5},",,";}
    else {print "0,";}
    if (exists $branchpoint{$bp} {"mutread"} {4}) {print $branchpoint{$bp} {"mutread"} {4},",,";}
    else {print "0,";}
    if (exists $branchpoint{$bp} {"mutread"} {3}) {print $branchpoint{$bp} {"mutread"} {3},",,";}
    else {print "0,";}
    if (exists $branchpoint{$bp} {"mutread"} {2}) {print $branchpoint{$bp} {"mutread"} {2},",,";}
    else {print "0,";}
    if (exists $branchpoint{$bp} {"mutread"} {1}) {print $branchpoint{$bp} {"mutread"} {1},",,";}
    else {print "0,";}
    if (exists $branchpoint{$bp} {"mutread"} {0}) {print $branchpoint{$bp} {"mutread"} {0},"\t";}
    else {print "0\t";}
}

```

```
    if (exists $branchpoint{$bp} {"mutreaduniq"} {5}) {print
$branchpoint{$bp} {"mutreaduniq"} {5}, ",";}
    else {print "0,";}
    if (exists $branchpoint{$bp} {"mutreaduniq"} {4}) {print
$branchpoint{$bp} {"mutreaduniq"} {4}, ",";}
    else {print "0,";}
    if (exists $branchpoint{$bp} {"mutreaduniq"} {3}) {print
$branchpoint{$bp} {"mutreaduniq"} {3}, ",";}
    else {print "0,";}
    if (exists $branchpoint{$bp} {"mutreaduniq"} {2}) {print
$branchpoint{$bp} {"mutreaduniq"} {2}, ",";}
    else {print "0,";}
    if (exists $branchpoint{$bp} {"mutreaduniq"} {1}) {print
$branchpoint{$bp} {"mutreaduniq"} {1}, ",";}
    else {print "0,";}
    if (exists $branchpoint{$bp} {"mutreaduniq"} {0}) {print
$branchpoint{$bp} {"mutreaduniq"} {0}, "\t";}
    else {print "0\t";}

```

```
    foreach my $source (keys %{$branchpoint{$bp} {"found"}}) {
        print $source, ",";
    }
    print "\n";
}
```





```

    if ($pos1 =~ /0\,0\,0\,0\,0\,0\,(\d+)/){
        $pos1new = $1;
    }
    else {print "error: $line";}
}

```

```

if (($motif eq "canonical")||($motif eq "canonicalC")||($motif eq "TRAYTRY")){
    if ($pos2 =~ /0\,0\,0\,(\d+)\,(\d+)\,(\d+)/){
        $pos2new = $1.", ".$2."(".$3.)";
    }
    else {print "error: $line";}
}
elseif (($motif eq "canonical2nt")||($motif eq "TRANYTRY")){
    if ($pos2 =~ /0\,0\,(\d+)\,(\d+)\,(\d+)\,(\d+)/){
        $pos2new = $1.", ".$2."(".$3.", ".$4.)";
    }
    else {print "error: $line";}
}
elseif (($motif eq "TRANNYTRY")){
    if ($pos2 =~ /0\,(\d+)\,(\d+)\,(\d+)\,(\d+)\,(\d+)/){
        $pos2new = $1.", ".$2."(".$3.", ".$4.", ".$5.)";
    }
    else {print "error: $line";}
}
elseif ($motif eq "none"){
    if ($pos2 =~ /0\,0\,0\,0\,0\,0\,(\d+)/){
        $pos2new = $1;
    }
    else {print "error: $line";}
}
elseif ($motif eq "template_switching"){
    if ($pos2 =~ /0\,0\,0\,0\,0\,0\,(\d+)/){
        $pos2new = $1;
    }
    else {print "error: $line";}
}
elseif ($motif eq "circle"){
    if ($pos2 =~ /0\,0\,0\,0\,0\,0\,(\d+)/){
        $pos2new = $1;
    }
    else {print "error: $line";}
}
}

```

```

if (($motif eq "canonical")||($motif eq "canonicalC")||($motif eq "TRAYTRY")){
    if ($pos3 =~ /0\,0\,0\,(d+)\,(d+)\,(d+)/){
        $pos3new = $1.", ".$2."(".$3.)";
    }
    else {print "error: $line";}
}
elseif (($motif eq "canonical2nt")||($motif eq "TRANYTRY")){
    if ($pos3 =~ /0\,0\,(d+)\,(d+)\,(d+)\,(d+)/){
        $pos3new = $1.", ".$2."(".$3.", ".$4.)";
    }
    else {print "error: $line";}
}
elseif (($motif eq "TRANNYTRY")){
    if ($pos3 =~ /0\,(d+)\,(d+)\,(d+)\,(d+)\,(d+)/){
        $pos3new = $1.", ".$2."(".$3.", ".$4.", ".$5.)";
    }
    else {print "error: $line";}
}
elseif ($motif eq "none"){
    if ($pos3 =~ /0\,0\,0\,0\,0\,0\,(d+)/){
        $pos3new = $1;
    }
    else {print "error: $line";}
}
elseif ($motif eq "template_switching"){
    if ($pos3 =~ /0\,0\,0\,0\,0\,0\,(d+)/){
        $pos3new = $1;
    }
    else {print "error: $line";}
}
elseif ($motif eq "circle"){
    if ($pos3 =~ /0\,0\,0\,0\,0\,0\,(d+)/){
        $pos3new = $1;
    }
    else {print "error: $line";}
}
}

```

```

if (($motif eq "canonical")||($motif eq "canonicalC")||($motif eq "TRAYTRY")){

```

```

        if ($pos4 =~ /0\,0\,0\,(\d+)\,(\d+)\,(\d+)/){
            $pos4new = $1.".".$2."(".$3.)";
        }
        else {print "error: $line";}
    }
    elsif (($motif eq "canonical2nt")||($motif eq "TRANYTRY")){
        if ($pos4 =~ /0\,0\,(\d+)\,(\d+)\,(\d+)\,(\d+)/){
            $pos4new = $1.".".$2."(".$3.".".$4.)";
        }
        else {print "error: $line";}
    }
    elsif (($motif eq "TRANNYTRY")){
        if ($pos4 =~ /0\,(\d+)\,(\d+)\,(\d+)\,(\d+)\,(\d+)/){
            $pos4new = $1.".".$2."(".$3.".".$4.".".$5.)";
        }
        else {print "error: $line";}
    }
    elsif ($motif eq "none"){
        if ($pos4 =~ /0\,0\,0\,0\,0\,0\,(\d+)/){
            $pos4new = $1;
        }
        else {print "error: $line";}
    }
    elsif ($motif eq "template_switching"){
        if ($pos4 =~ /0\,0\,0\,0\,0\,0\,(\d+)/){
            $pos4new = $1;
        }
        else {print "error: $line";}
    }
    elsif ($motif eq "circle"){
        if ($pos4 =~ /0\,0\,0\,0\,0\,0\,(\d+)/){
            $pos4new = $1;
        }
        else {print "error: $line";}
    }
}

    print
    $chrom,"t",$bp,"t",$strand,"t",$motif,"t",$seq,"t",$pos1new,"t",$pos2new,"t",$pos3new,"t",$pos4
    new,"t",$source,"n";
}

    else {print $_;}
}

```

```

#assign_3ss_and_category.pl

use warnings;

my %ss;

open (FH, "hg19_introns.bed") or die $!;
while (<FH>){
    $chrom = (split /\t/,$_)[0];
    $coord1 = (split /\t/,$_)[1];
    $coord2 = (split /\t/,$_)[2];
    $strand = (split /\t/,$_)[5]; chomp $strand;
    if ($strand eq "+"){
        $threess = $chrom."_"$strand."_"$coord2;
        $ss{$threess}=1;
    }
    if ($strand eq "-"){
        $threess = $chrom."_"$strand."_"$coord1;
        $ss{$threess}=1;
    }
} close FH;
open (FH, $ARGV[0]) or die $!;
while (<FH>){
    $line = $_;

    ($chrom,$bp,$strand,$motif,$seq,$pos1,$pos2,$pos3,$pos4,$source)=(split /\t/,$_);chomp
    $source;

    $flag = 0;
    my $j= 0;
    $category = "";
    $true3ss = "";
    $dist = "";
    while ($flag==0){
        $threess = "";
        if ($strand eq "+"){
            $threess = $chrom."_"$strand."_"($bp+$j);
        }
        elsif ($strand eq "-"){
            $threess = $chrom."_"$strand."_"($bp-$j);
        }
        }

    if (exists $ss{$threess}){

        if ($strand eq "+"){
            $threess = $bp+$j;

```

```

        $flag = 1;
        $true3ss = $threess;

    }
    if ($strand eq "-"){
        $threess = $bp-$j;
        $flag = 1;
        $true3ss = $threess;

    }
}
$j++;
if ($j > 1000000){$flag = 2;}
}
if ($flag ==2){$dist = "null"; $true3ss = "null"; $category = "null";}
else {
    if ($strand eq "+"){
        $dist = $bp - $true3ss;
    }
    elseif ($strand eq "-"){
        $dist = $true3ss - $bp;
    }
    if ($dist > 0){
        $category = "inside 3ss";
    }
    elseif ($dist ==0){
        $category = "circle";
    }
    elseif ($dist >=-10){
        $category = "proximal";
    }
    elseif ($dist >= -60){
        $category = "expected";
    }
    else {
        $category = "distal";
    }
}}

    print
    $chrom,"\t",$bp,"\t",$strand,"\t",$motif,"\t",$seq,"\t",$pos1,"\t",$pos2,"\t",$pos3,"\t",$pos4,"\t",$true3ss,
    "\t",$dist,"\t",$category,"\t",$source,"\n";

}

```

```

#make_table_4.pl

use warnings;

open (FH, "BP_table_3_final.txt") or die $!;

while (<FH>){
    ($chrom,$bp,$strand,$motif,$seq,$readtot,$readuniq,$misread,$misuniq,$threeprss,$bpdist,$category,$sources)=(split /\t/,$_);
    $line = $_;
    chomp $sources;
    $seq2 = "";$bpnt = "";
    if ($line =~ /circle/){
        $motif = "circle";
        $c1 = $bp - 5; $c2 = $bp+5;
        open (FHout, ">temp.bed") or die $!;
        print FHout $chrom,"\t",$c1,"\t",$c2,"\tbed\t0\t",$strand,"\n";
        close FHout;
        $cmd = "bedtools getfasta -fi /home/annotations/bowtie/hg19/hg19.fa -bed temp.bed -s -tab -fo temp.fa";
        system($cmd);
        open (FH2, "temp.fa") or die $!;
        $seqcirc = "";
        while (<FH2>){
            ($id,$seqcirc)=(split /\t/,$_); chomp $seqcirc;
        }
        close FH2;
        $seqcirc =~ tr/[a-z]/[A-Z]/;
        $seqcirc =~ /^^(.....)(.)(.....)/;
        $seq2 = $1.$2."*".$3;
        $bpnt = $2;
    }

    elsif ($motif eq "none"){
        $c1 = $bp - 5; $c2 = $bp+5;
        open (FHout, ">temp.bed") or die $!;
        print FHout $chrom,"\t",$c1,"\t",$c2,"\tbed\t0\t",$strand,"\n";
        close FHout;
        $cmd = "bedtools getfasta -fi /home/annotations/bowtie/hg19/hg19.fa -bed temp.bed -s -tab -fo temp.fa";
        system($cmd);
        open (FH2, "temp.fa") or die $!;
        $seqcirc = "";
        while (<FH2>){
            ($id,$seqcirc)=(split /\t/,$_); chomp $seqcirc;
        }
    }
}

```

```

        close FH2;
        $seqcirc =~ tr/[a-z]/[A-Z]/;
        $seqcirc =~ /^^(.....)(.)(.....)/;
        $seq2 = $1.$2."*".$3;
        $bpnt = $2;
    }
    elsif ($motif eq "template_switching"){
        $c1 = $bp - 5; $c2 = $bp+5;
        open (FHout, ">temp.bed") or die $!;
        print FHout $chrom,"\t",$c1,"\t",$c2,"\tbed\t0\t",$strand,"\n";
        close FHout;
        $cmd = "bedtools getfasta -fi /home/annotations/bowtie/hg19/hg19.fa -bed temp.bed -s -tab -
fo temp.fa";
        system($cmd);
        open (FH2,"temp.fa") or die $!;
        $seqcirc = "";
        while (<FH2>){
            ($id,$seqcirc)=(split /\t,$_); chomp $seqcirc;
        }
        close FH2;
        $seqcirc =~ tr/[a-z]/[A-Z]/;
        $seqcirc =~ /^^(.....)(.)(.....)/;
        $seq2 = $1.$2."*".$3;
        $bpnt = $2;
    }
    elsif ($motif eq "canonical"){
        if ($seq =~ /^^(.....)(.)(.)$/){
            $us = $1; $bulge = $2; $ds = $3;
            $bpnt = $bulge;
            $seq2 = $us."("$bulge.*").$ds;
        }
        else {print "error: $line";}
        $readtot =~ s/^(^,\/);
        $readuniq =~ s/^(^,\/);
        $misread =~ s/^(^,\/);
        $misuniq =~ s/^(^,\/);
    }
    elsif ($motif eq "canonicalC"){
        if ($seq =~ /^^(.....)(.)(.)$/){
            $us = $1; $bulge = $2; $ds = $3;
            $bpnt = $bulge;
            $seq2 = $us."("$bulge.*").$ds;
        }
        else {print "error: $line";}
        $readtot =~ s/^(^,\/);
        $readuniq =~ s/^(^,\/);
    }

```

```

$misread =~ s/^(^,\(/;
$misuniq =~ s/^(^,\(/;
}
elsif ($motif eq "canonical2nt"){
  if ($seq =~ /^(.....)(.)(.)/){
    $us = $1; $bulge = $2; $ds = $3;
    $bpnts = $bulge;
    if ($readuniq =~ /(\d+)\,(\d+)\((\d+)\,(\d+)\)/){
      $min2 = $1; $min1 = $2; $b1 = $3; $b2 = $4;
      $pos1score = $min2+$min1+$b1;
      $pos2score = $min1+$b1+$b2;
      if ($pos2score == $pos1score){
        if ($b1>$b2){
          $bulge =~ /(.)()/;
          $b1nt = $1; $b2nt = $2;
          $seq2 = $us."($b1nt.*$b2nt)".$ds;
          $bpnt = $b1nt;
          if ($strand eq "+"){
            $bp = $bp-1; $bpdist = $bpdist+1;
          }
          elsif ($strand eq "-"){
            $bp = $bp+1; $bpdist = $bpdist+1;
          }
        }
        else {
          $bulge =~ /(.)()/;
          $b1nt = $1; $b2nt = $2;
          $seq2 = $us."($b1nt.$b2nt.*)".$ds;
          $bpnt = $b2nt;
        }
      }
    }
    elsif ($pos2score>$pos1score){
      $bulge =~ /(.)()/;
      $b1nt = $1; $b2nt = $2;
      $seq2 = $us."($b1nt.$b2nt.*)".$ds;
      $bpnt = $b2nt;
    }
    else {
      $bulge =~ /(.)()/;
      $b1nt = $1; $b2nt = $2;
      $seq2 = $us."($b1nt.*$b2nt)".$ds;
      $bpnt = $b1nt;
      if ($strand eq "+"){
        $bp = $bp-1; $bpdist = $bpdist+1;
      }
    }
  }
}

```



```

        elif ($strand eq "-"){
            $bp = $bp+1; $bpdist = $bpdist+1;
        }
    }
}
else {print "error: $line";}
}
else {print "error: $line";}
$readtot =~ s/^(^,\/);
$readuniq =~ s/^(^,\/);
$misread =~ s/^(^,\/);
$misuniq =~ s/^(^,\/);
}
elif ($motif eq "TRAYTRY"){
    if ($seq =~ /^(..)(...)$/){
        $us = $1; $bulge = $2; $ds = $3;
        $bpnt = $bulge;
        $seq2 = $us."("$bulge.*")".$ds;
    }
    else {print "error: $line";}
    $readtot =~ s/^(^,\/);
    $readuniq =~ s/^(^,\/);
    $misread =~ s/^(^,\/);
    $misuniq =~ s/^(^,\/);
}
elif ($motif eq "TRANYTRY"){
    if ($seq =~ /^(..)(...)$/){
        $us = $1; $bulge = $2; $ds = $3;
        $bpnts = $bulge;
        if ($readuniq =~ /(\d+)\,(\d+)\((\d+)\,(\d+)\)/){
            $min2 = $1; $min1 = $2; $b1 = $3; $b2 = $4;
            $pos1score = $min2+$min1+$b1;
            $pos2score = $min1+$b1+$b2;
            if ($pos2score == $pos1score){
                if ($b1>$b2){
                    $bulge =~ /(.)\/;
                    $b1nt = $1; $b2nt = $2;
                    $seq2 = $us."("$b1nt.*"$b2nt.)".$ds;
                    $bpnt = $b1nt;
                    if ($strand eq "+"){
                        $bp = $bp-1; $bpdist = $bpdist+1;
                    }
                }
                elif ($strand eq "-"){
                    $bp = $bp+1; $bpdist = $bpdist+1;
                }
            }
        }
    }
}

```



```

#allscoresequal
if (($pos1score==$pos2score)&&($pos2score==$pos3score)){

    if (($b1 ==$b2)&&($b2==$b3)){
        $bulge =~ /(.)().(.)/;
        $b1nt = $1; $b2nt = $2;$b3nt = $3;
        $seq2 = $us."("$b1nt.$b2nt.$b3nt.*").$ds;
        $bpnt = $b3nt;
    }
    elsif (($b1>$b2)&&($b1>$b3)){
        if ($strand eq "+"){
            $bp = $bp-2;
            $bpdist = $bpdist+2;
        }
        elsif ($strand eq "-"){
            $bp = $bp+2;
            $bpdist = $bpdist+2;
        }
        }
        $bulge =~ /(.)().(.)/;
        $b1nt = $1; $b2nt = $2;$b3nt = $3;
        $seq2 = $us."("$b1nt.*"$b2nt.$b3nt.)".$ds;
        $bpnt = $b1nt;
    }
    elsif (($b2 > $b3)&&($b2>$b1)){
        if ($strand eq "+"){
            $bp = $bp-1;
            $bpdist = $bpdist+1;
        }
        }
        elsif ($strand eq "-"){
            $bp = $bp+1;
            $bpdist = $bpdist+1;
        }
        }
        $bulge =~ /(.)().(.)/;
        $b1nt = $1; $b2nt = $2;$b3nt = $3;
        $seq2 = $us."("$b1nt.$b2nt.*"$b3nt.)".$ds;
        $bpnt = $b2nt;
    }
    elsif (($b3>$b2)&&($b3>$b1)){
        $bulge =~ /(.)().(.)/;
        $b1nt = $1; $b2nt = $2;$b3nt = $3;
        $seq2 = $us."("$b1nt.$b2nt.$b3nt.*").$ds;
        $bpnt = $b3nt;
    }
    }
    elsif (($b1==$b2)&&($b1>$b3)){
        if ($strand eq "+"){
            $bp = $bp-1;

```

```

        $bpdist = $bpdist+1;
    }
    elseif ($strand eq "-"){
        $bp = $bp+1;
        $bpdist = $bpdist+1;
    }
    $bulge =~ /(.)().(.)/;
    $b1nt = $1; $b2nt = $2;$b3nt = $3;
    $seq2 = $us."("$b1nt.$b2nt.*"$b3nt.)".$ds;
    $bpnt = $b2nt;
}
else {
    $bulge =~ /(.)().(.)/;
    $b1nt = $1; $b2nt = $2;$b3nt = $3;
    $seq2 = $us."("$b1nt.$b2nt.$b3nt.*")".$ds;
    $bpnt = $b3nt;
}
}
#pos3&2 > pos1, but are equal
elseif (($pos3score>$pos1score)&&($pos3score==$pos2score)){
    if ($b2>$b3){
        if ($strand eq "+"){
            $bp = $bp-1;
            $bpdist = $bpdist+1;
        }
        elseif ($strand eq "-"){
            $bp = $bp+1;
            $bpdist = $bpdist+1;
        }
        $bulge =~ /(.)().(.)/;
        $b1nt = $1; $b2nt = $2;$b3nt = $3;
        $seq2 = $us."("$b1nt.$b2nt.*"$b3nt.)".$ds;
        $bpnt = $b2nt;
    }
    else {
        $bulge =~ /(.)().(.)/;
        $b1nt = $1; $b2nt = $2;$b3nt = $3;
        $seq2 = $us."("$b1nt.$b2nt.$b3nt.*")".$ds;
        $bpnt = $b3nt;
    }
}
elseif (($pos3score == $pos1score)&&($pos1score>$pos2score)){
    if ($b1>$b3){
        if ($strand eq "+"){
            $bp = $bp-2;
            $bpdist = $bpdist+2;

```

```

    }
    elseif ($strand eq "-"){
        $bp = $bp+2;
        $bpdist = $bpdist+2;
    }
    $bulge =~ /(.)().(.)\/;
    $b1nt = $1; $b2nt = $2;$b3nt = $3;
    $seq2 = $us."("$b1nt."*"$b2nt.$b3nt.)".$ds;
    $bpnt = $b1nt;
}
else {
    $bulge =~ /(.)().(.)\/;
    $b1nt = $1; $b2nt = $2;$b3nt = $3;
    $seq2 = $us."("$b1nt.$b2nt.$b3nt.*")".$ds;
    $bpnt = $b3nt;
}
}
#pos1 >2/3
elseif (($pos1score>$pos2score)&&($pos1score>$pos3score)){
    if ($strand eq "+"){
        $bp = $bp-2; $bpdist = $bpdist+2;
    }
    elseif ($strand eq "-"){
        $bp = $bp+2; $bpdist = $bpdist+2;
    }
    }
    $bulge =~ /(.)().(.)\/;
    $b1nt = $1; $b2nt = $2;$b3nt = $3;
    $seq2 = $us."("$b1nt.*"$b2nt.$b3nt.)".$ds;
    $bpnt = $b1nt;
}
#pos2 > 1/3
elseif (($pos2score>$pos1score)&&($pos2score>$pos3score)){
    if ($strand eq "+"){
        $bp = $bp-1; $bpdist = $bpdist+1;
    }
    elseif ($strand eq "-"){
        $bp = $bp+1; $bpdist = $bpdist+1;
    }
    }
    $bulge =~ /(.)().(.)\/;
    $b1nt = $1; $b2nt = $2;$b3nt = $3;
    $seq2 = $us."("$b1nt.$b2nt.*"$b3nt.)".$ds;
    $bpnt = $b2nt;
}
#pos3 > 1/2
elseif (($pos3score>$pos1score)&&($pos3score>$pos2score)){
    $bulge =~ /(.)().(.)\/;

```

```

        $b1nt = $1; $b2nt = $2;$b3nt = $3;
        $seq2 = $us."("$b1nt.$b2nt.$b3nt.*").$ds;
        $bpnt = $b3nt;
    }
    #pos1=2, > 3
    elsif (($pos1score==$pos2score)&&($pos1score>$pos3score)){

        if ($b1>$b3){
            if ($strand eq "+"){
                $bp = $bp-2;
                $bpdist = $bpdist+2;
            }
            elsif ($strand eq "-"){
                $bp = $bp+2;
                $bpdist = $bpdist+2;
            }
            $bulge =~ /(.)().(.)\;/;
            $b1nt = $1; $b2nt = $2;$b3nt = $3;
            $seq2 = $us."("$b1nt.*"$b2nt.$b3nt.)".$ds;
            $bpnt = $b1nt;
        }
        else {
            $bulge =~ /(.)().(.)\;/;
            $b1nt = $1; $b2nt = $2;$b3nt = $3;
            $seq2 = $us."("$b1nt.$b2nt.*"$b3nt.)".$ds;
            $bpnt = $b2nt;
        }
    }
    else {print "logic bpfnd error: $line";}

}
else {print "error: $line";}
}
else {print "error: $line";}
$readtot =~ s/^(^,)\;/;
$readuniq =~ s/^(^,)\;/;
$misread =~ s/^(^,)\;/;
$misuniq =~ s/^(^,)\;/;
}

$mutation = "no"; $bias = "no";
$multiple = "no";
$totalreadevidence = 0; $totaluniqreadevidence = 0;
$t = $readtot; $u = $readuniq; $m = $misread;
$t =~ s/[[:punct:]]/t/g;
$u =~ s/[[:punct:]]/t/g;

```

```

$m = ~ s/[[:punct:]]^t/g;
@tl = (split ^t/$t); @ul = (split ^t/$u); @ml = (split ^t/$m);
foreach (@tl){
    if ($_ =~ /\d+)/{
        $totalreadevidence = $totalreadevidence+$1;
    }
}
foreach (@ul){
    if ($_ =~ /\d+)/{
        $totaluniquereadevidence = $totaluniquereadevidence+$1;
    }
}
foreach (@ml){
    if ($_ =~ /\d+)/{
        if ($_ > 0){ $mutation = "yes"; }
    }
}
@sourcelist = (split ^/,,$sources);
$num = 0;
foreach (@sourcelist){
    if ($_ =~ ^w+){
        $num++;
    }
    if ($_ =~ /fairbrother/){}
    elsif ($_ =~ /Mattick/){}
    else { $bias = "yes"; }
}
if ($num > 1){ $multiple = "yes"; }

```

print

```

$chrom,"^t",$bp,"^t",$strand,"^t",$motif,"^t",$seq2,"^t",$bpnt,"^t",$threepress,"^t",$bpdist,"^t",$category,"^t",
"$totalreadevidence,"^t",$totaluniquereadevidence,"^t",$mutation,"^t",$multiple,"^t",$bias,"^t",$readtot,"^t",
,$readuniq,"^t",$misread,"^t",$misuniq,"^t",$sources,"^n";

```

```

}
#make_table_5.pl

```

```

open (FH, "BP_table_4_final.txt") or die $!;

```

```

open (FHout, ">BP_table_5_final.txt") or die $!;

```

```

while (<FH>){

```

```

    ($chrom,$bp,$strand,$motif,$seq,$bpnt,$threess,$bpdist,$pos,$count,$countuniq,$q1,$q2,$q3,$c1,
    $c2,$m1,$m2,$files)=(split ^t,$_); chomp $files;

```

```

    my %fs;

```

```

    @f = (split ^/,,$files);

```

```

foreach $a (@f){
    $a =~ /(.)\(\d+\);(\d+)\;(\d+)\)/;
    $file = $1; $read = $2; $uniq = $3;
    if (exists $fs{$file}){
        $fs{$file}[0] = $fs{$file}[0]+$read;
        $fs{$file}[1] = $fs{$file}[1]+$uniq;
    }
    else {
        $fs{$file}[0] = $read;
        $fs{$file}[1] = $uniq;
    }
}
$filestring = "";
foreach my $key (keys %fs){
    $filestring = $filestring.$key."(".$fs{$key}[0].";".$fs{$key}[1].").";
}
print FHout
$chrom,"\t",$bp,"\t",$strand,"\t",$motif,"\t",$seq,"\t",$bpnt,"\t",$threess,"\t",$bpdist,"\t",$pos,"\t",$count
,"\t",$countuniq,"\t",$q1,"\t",$q2,"\t",$q3,"\t",$c1,"\t",$c2,"\t",$m1,"\t",$m2,"\t",$filestring,"\n";
}

```
