# Supplementary material for: TechCrunch Interview With Mark Zuckerberg On $100 Million Education Donation
Source: HighWire-hosted journal article supplement (doi:10.1101/gr.202820.115), 2010-01-01
Supplement: Supplemental_Methods.docx [file Supplemental_Methods.docx]

Supplemental Methods:

# Methods:

**Lariat read identification**

Human RNA-seq data was obtained from the ENCODE project (GSE30567) ([The ENCODE Project Consortium 2012](#_ENREF_50)). Additional human RNA-seq data was analyzed from GSE53328 ([Mercer et al. 2015](#_ENREF_34)). Mouse RNA-seq data was obtained from accession GSE39619 ([Yue et al. 2014](#_ENREF_57)). Fission yeast RNA-seq data was obtained from accession GSE50246. In-house perl scripts were used to identify lariat reads ([Taggart et al. 2012](#_ENREF_48)). The scripts called on the Bowtie aligner ([Langmead et al. 2009](#_ENREF_31)) to align reads and read fragments to the genome. First, reads were aligned in a canonical fashion to the reference genome, allowing up to three mismatches. Reads that aligned canonically were discarded. The remaining reads were subjected to a split read alignment, searching for fragments that aligned in an inverted fashion. At least 8nt were required on either end of the split junction, and up to three mismatches were allowed. If the tail portion of the read aligned directly to the 5’ss, and the head portion aligned downstream, the mapped coordinate of the last nucleotide of the head portion was determined to be the branchpoint. In the case of endpoint ambiguity (either overlapping portions of the read aligning, or mismatches in the split junction), the junction was forced at the 5’ss. For each branchpoint, the assigned 3’ss was chosen to be the closest annotated 3’ss. Annotations used were hg19 UCSC genes, mm9 UCSC genes, and ensemble EF2 for human, mouse and fission yeast, respectively. U12 introns were determined using the U12DB ([Alioto 2007](#_ENREF_1)). All branchpoint location data and all scripts used in identifying lariat reads are available at <http://fairbrother.biomed.brown.edu/data/Lariat2016/> .

Branchpoint counts and motif statistics stratified by sample can be found in Supplemental Table S10.

**Mapping modes of U2snRNA:pre-mRNA interactions**

A custom perl script was used to align mapped branchpoint sequences to the U2 sequence. Modes of U2snRNA:branch site interaction were first discovered using the set of expected branchpoints 18-35 nucleotides upstream of the 3’ splice site. Background sets of data were created by randomly selecting sequences from windows 18-35 nucleotides upstream of annotated 3’ splice sites. Both the real and background sequences were aligned to the compliment of the U2 sequence. This alignment was allowed within a 20 nt window centered around the branchpoint, and allowed for wobble base-pairing, a bulge anywhere within the aligned sequence, and a bulge of size 0-3 nucleotides. The real and background set were both sampled 1000 times, and the most statistically significant alignment from real vs background was identified. The sequences that fit that alignment were then removed, and the sampling was repeated (in order to avoid redundant alignments) until there were no more statistically significant U2 alignment modes (p < 0.02).

After the novel modes were identified from perfect matches to the U2 sequence, the remaining reads were aligned to these modes allowing for mismatches. Position weight matrices were created using the perfect match sequences. The remaining reads were then scored to these position weight matrices using the patser package ([Hertz and Stormo 1999](#_ENREF_24)), allowing a sliding window to account for reverse transcriptase skipping behavior. Each branchpoint was assigned to the model that it scored most strongly to the position weight matrix with a P-value < .01.

**Mapping template switching reads**

In the lariat read data, we discovered a set of lariat reads that appeared to have arisen due to template switching because of both the sequence complementarity to the 5’ss and the atypical positional distribution. To account for RT template switching, the branchpoint sequence was scored against its own 5’ splice site using the patser package ([Hertz and Stormo 1999](#_ENREF_24)). If a 6nt window directly downstream of the branchpoint sequence scored significantly (p < 0.01) to its 5’ splice site, it was determined to have arisen from template switching. Template switching reads were discarded from all subsequent analysis.

**Minigene splicing reporter**

To test the effect of branchpoints mutation on splicing, genomic fragment spanning 3 exons and 2 introns from *SHMT2* (Chr12:57624589-57625696;-), *APRT* (Chr16:88876478-88878064;-), and *LONP1* (Chr19:5693309-5694563;-) were cloned into pcDNA3.1/zeo(+) vector (Invitrogen) between the EcoR1 and Nhe1 sites. Subsequently, ±3 nt (total 7 nt) around the distal branchpoints in the upstream intron (*SHMT2*: Chr12:57625198, *APRT*: Chr16:88877077 and *LONP1*: Chr19: 5694216) and/or ±3 nt around the expected branchpoints (*SHMT2*: Chr12:57625240, *APRT*: Chr16:88876987 and *LONP1*: Chr19:5693500) were deleted by PCR-based mutagenesis or by GeneArt® Strings™ DNA Fragments synthesis service (Invitrogen).

To test branchpoint motifs generated from U2 alignment experiment, various motifs were inserted at the expected branchpoint position into the double branchpoint mutants of *SHMT2* or *APRT* backbone at positions -22nt and -24 nt, respectively (Supplementary Table 9). Alternatively, 10 nt of the distal branch site (±5 nt around the branchpoint) is inserted at the expected branchpoint position of *APRT* to test the functionality of distal branch site sequence. For the composite splice site experiment, the aligned U2 motifs were swapped into *SHMT2* or *APRT* backbone at the 3’ss. These constructs were transfected into HEK293T or HeLa cells by Lipofectamine® 3000 transfection reagent (Invitrogen, Cat#L3000). After 20hr, the RNA was harvested by TRIzol, reverse transcribed with SuperScript II (Invitrogen, Cat#18064) or SuperScript III Reverse Transcriptase (Invitrogen, Cat# 18080), and subject to PCR using primers on pcDNA3.1/zeo vector and GoTaq Green Master Mix (Promega, Cat#M7122) to assay the exon inclusion. Following the agarose electrophoresis, the DNA bands were quantified by the Image J software (imagej.nih.gov).

**Alternative splicing maps**

Alternative splicing for 16 cell lines was determined using MISO software package ([Katz et al. 2010](#_ENREF_29)) and alternative splicing events index. For both exon skipping and alternate 3’splice site usage, events were binned into > 95% inclusion or exclusion, and the remaining events were discarded. If branchpoint information from a particular cell line was mapped for a 95% inclusion or exclusion alternative splicing event from that cell line, it was included in the distribution. For exon skipping, branchpoints were mapped to the closest downstream 3’ splice site. For alternate 3’ splice site, branchpoints were mapped with the more proximal 3’ splice site as position 0.

**Determining order of intron removal in a transcript**

ENCODE RNA-seq paired-end sequencing reads covering partially spliced transcripts were used to infer splicing order. An informative read contained one end mapping across an intronic or exon-intron pre-mRNA region, and the other end maps across a spliced exon-exon junction. Reads across intron pairs were counted and interpreted to infer the fraction of time one intron spliced before the other. Intron pairs that had at least 10 informative reads and at least 90% unidirectional order, were determined to have a clear order preference, and were included in this analysis.

**Lariat enrichment and library preparation**

10 μg of total RNA from SF3B1 K700K or SF3B1 K700E knocked-in NALM-6 cell lines (gift from H3 Biomedicine Inc.) were treated with RibominusTM Eukaryotic Kit (Life Technologies, Cat#K15020) to remove the ribosomal RNA. The resulted RNA was homogenized by 0.25 U RNase III (Ambion, Cat#2290)/μg RNA/10 ul reaction at 37 °C for 10 min, followed by phenol/chloroform extraction and ethanol precipitation to remove the RNase. Reverse transcribe 250 ng of the homogenized RNA with SuperScript II Reverse Transcriptase (Invitrogen, Cat#18064) to make the cDNA. To generate Illumina-compatible cDNA library, the cDNA is subject to second strand cDNA synthesis using NEBNext® mRNA Second Strand Synthesis Module (New England BioLabs Inc.), end-repair with NEBNext® End Repair Module, dA-tailing with NEBNext® dA-Tailing Module, ligation with Illumina universal and barcoded adaptors with NEBNext® Quick Ligation Module, and finally amplified by NEBNext® High-Fidelity 2X PCR Master Mix and the outer primers (5'AATGATACGGCGACCACCGAGATCTACAC and 5'CAAGCAGAAGACGGCATACGAGAT).

To enrich the cDNA that crosses the 5’ss- branchpoint junction, 250 ng of cDNA library of SF3B1 K700K and K700E NALM-6 cells are combined and hybridized with 500 ng of biotinylated RNA probes targeting 5’ end of introns at 65.2 °C for Low-Tm probes or 78 °C for high-Tm probes. In short, heat the library mix (500 ng cDNA library, 2.5 μg human Cot1 DNA, 2.5 µg salmon sperm DNA and 0.6 μM blocking primers that recognize the common sequence) at 95 °C for 5 min, and warm the 2X hybridization buffer (25 μl 20X SSPE, 1 μl 0.5 M EDTA, 10 μl 50X Denhardt’s solution and 1% SDS) at the hybridization temperature for 3 min. Then warm the oligo bait mix (500 ng biotinylated RNA, 1 μl RNaseOUT [Life Technologies, Cat#10777-019], and ddH2O to 6 μl) for 2 min. Mix 3 components and hybridize for 24 hr. Then capture the hybridized cDNA with 150 µl Dynabeads® MyOne™ Streptavidin T1 (Life Technologies, Cat#65601) in 200 μl binding buffer (1M NaCl, 10 mM Tris PH 7.5 and 1 mM EDTA), rotating at R. T. for 30 min. To wash out the nonspecific binding, resuspend beads in wash buffer (1X SSC and 0,1% SDS) at 65 °C for 10 min 3 times. Then elute the bound cDNA by 50 μl 0.1 M NaOH and neutralize the eluent with 70 μl 1M Tris PH 7.5. Finally, purify the eluent cDNA with Ampure XP beads (Beckman Coulter). Re-amplify the library with NEBNext® High-Fidelity 2X PCR Master Mix.

Alternatively, the cDNA library was treated by duplex-specific nuclease (DSN, Evrogen, Cat#EA001) to enrich the rare species following the Illumina DSN normalization protocol (http://supportres.illumina.com/documents/myillumina/7836bd3e-3358-4834-b2f7-80f80acb4e3f/dsn_normalization_sampleprep_application_note_15014673_c.pdf).

Part of the probe-captured cDNA library was further treated by DSN. In details, 100 ng high-Tm cDNA was denatured at 95 °C for 2 min and kept at 80 °C and 100 ng low-Tm cDNA was denatured and kept at 68 °C. After 5 hr incubation, digest the hybridized cDNA with 4U DSN at 72 °C for the high-Tm cDNA and 68 °C for the low-Tm cDNA for 10 min. Stop the reaction by the stop solution, purify the remaining cDNA by Ampure XD beads and re-amplify the cDNA by PCR. Part of the probe-captured cDNA was subject to a second-round of probe capture. cDNAs across the branchpoint junction was enriched by various rounds of treatments: DSN only, capture only, capture+DSN, capture+capture, capture+DSN+capture, and capture+DSN+capture+DSN. The enriched cDNA library was sequenced using HiSeq paired-end 100 bp protocol at BGI Hong Kong.

**Branchpoint validation by Nested RT-PCR**

To extract RNA from cell lines, HEK293T cells or HeLa cells of SF3B1 wildtype or K700E background (gift from H3 Biomedicine Inc.) were grown to 80-90% confluence in DMEM+10% FBS supplemented with 1000 U/ml of each penicillin and streptomycin (Gibco, Cat#15140-122) at 37 °C in 5% CO2. To extract RNA from multiple vertebrate tissues, total brains of mouse or rat, or 24 hr zebrafish whole embryos were homogenized in TRIzol reagent (Invitrogen, Cat#15596). Total RNA was isolated using TRIzol reagent according to the manufacturer’s instructions and suspended in DEPC water. 1 μg of the samples were digested with Amplification grade DNase I (Invitrogen, Cat#18068) according to the manufacturer’s instructions to remove any DNA contamination. cDNA was synthesized using random 9-mer primers (Integrated DNA Technologies) and SuperScript III Reverse Transcriptase (Invitrogen, Cat#18080) according to the manufacturer’s instructions. PCR was then performed on 1μl of cDNA using the outer primer pair (Supplemental Table S11) with GoTaq Green Master Mix (Promega, Cat#M7122) in a total volume of 20μl according to the manufacturer’s instructions. A second PCR using “nested” primers (Supplemental Table S11) was then performed with 0.5μl of the initial PCR product used as the template. PCR was performed using Bio-Rad PCR machine programmed for 5 min at 95 °C for initial denaturation, followed by 35 cycles of 20 s at 95 °C for denaturation, 25 s at 55 °C for annealing and 25 s at 72 °C for extension. The final extension was set for 5 min at 72 °C. The product of the second PCR was then examined by electrophoresis at 150 V for 30 min in a 2% agarose gel in 1 x TAE buffer. The appropriate bands, if required, were excised and purified using a Qiagen gel extraction kit (Qiagen, Cat#28704). PCR products were then cloned into pCR2.1 using a TOPO TA Cloning Kit (Invitrogen, Cat#K4500) and transformed into TOP10 *E. coli* cells. Individual colonies were grown in LB+ampicillin media, and plasmid DNA was isolated using a Qiagen Miniprep Kit (Qiagen, Cat#27106), and was subsequently sequenced.
