# Supplementary material for: TechCrunch Interview With Mark Zuckerberg On $100 Million Education Donation
Source: HighWire-hosted journal article supplement (doi:10.1101/gr.202820.115), 2010-01-01
Supplement: Supplemental_Table_S2.xlsx [file Supplemental_Table_S2.xlsx]

## Sheet: BP_table_5_human_encode.txt
Branchpoint coordinate			Motif Model	Branchpoint Sequence - ( ) around bulge, * - BP nucleotide	BP nucleotide	3'ss	BP-3'ss distance	BP position	Total Read Evidence	Unique Read Evidence	Mutation in at Least 1 Read	Discovered in Multiple RNAseq Sources	Discovered in unbiased RNAseq source	Total Read Count (by position)	Unique Read Count (by position)	Read Count with Mutation (by position)	Unique Read Count with Mutation (by position)	RNAseq Source
chr1	881941	-	canonical	GGCTG(A*)C	A	881925	-16	expected	4	4	yes	yes	yes	1,0,(3)	1,0,(3)	0,0,(3)	0,0,(3)	SRR315306(1;1),SRR545717(1;1),SRR545694(1;1),SRR317043(1;1),
chr1	1154326	-	canonical	TACCC(A*)C	A	1154323	-3	proximal	4	2	no	yes	yes	0,4,(0)	0,2,(0)	0,0,(0)	0,0,(0)	SRR315309(1;1),SRR545692(3;1),
chr1	1238682	-	canonical	TGCTC(A*)C	A	1238661	-21	expected	1	1	no	no	yes	0,1,(0)	0,1,(0)	0,0,(0)	0,0,(0)	SRR545692(1;1),
chr1	1239553	-	canonical	TGCAG(G*)T	G	1239523	-30	expected	10	1	no	no	yes	0,10,(0)	0,1,(0)	0,0,(0)	0,0,(0)	SRR545685(10;1),
chr1	1250364	-	canonical	GGCTC(A*)C	A	1250342	-22	expected	1	1	yes	no	yes	0,0,(1)	0,0,(1)	0,0,(1)	0,0,(1)	SRR317066(1;1),
chr1	1322992	-	canonical	TGGTC(A*)C	A	1322962	-30	expected	1	1	no	no	yes	1,0,(0)	1,0,(0)	0,0,(0)	0,0,(0)	SRR317042(1;1),
chr1	1601616	-	canonical	TATTG(A*)T	A	1601590	-26	expected	1	1	yes	no	yes	0,0,(1)	0,0,(1)	0,0,(1)	0,0,(1)	SRR545692(1;1),
chr1	1718519	-	canonical	TTTTC(A*)C	A	1718492	-27	expected	44	16	yes	yes	yes	0,1,(43)	0,1,(15)	0,0,(18)	0,0,(7)	SRR545704(1;1),SRR317067(4;1),SRR307930(1;1),SRR545715(5;1),SRR317051(1;1),SRR545711(13;1),SRR307921(3;1),SRR545718(6;2),SRR534333(1;1),SRR317042(1;1),SRR545717(1;1),SRR307923(1;1),SRR545709(1;1),SRR545713(3;1),SRR307922(2;1),
chr1	1738004	-	canonical	TACTG(A*)T	A	1737977	-27	expected	3	3	yes	yes	yes	2,0,(1)	2,0,(1)	0,0,(1)	0,0,(1)	SRR545691(1;1),SRR545718(1;1),SRR545717(1;1),
chr1	1749338	-	canonical	TGCTA(A*)T	A	1749314	-24	expected	3	3	yes	yes	yes	1,0,(2)	1,0,(2)	0,0,(2)	0,0,(2)	SRR545705(1;1),SRR317043(1;1),SRR307931(1;1),
chr1	2338360	-	canonical	TCCTG(A*)T	A	2338334	-26	expected	1	1	no	no	yes	0,0,(1)	0,0,(1)	0,0,(0)	0,0,(0)	SRR307924(1;1),
chr1	3551878	-	canonical	TATTA(A*)C	A	3551858	-20	expected	2	1	no	no	yes	0,2,(0)	0,1,(0)	0,0,(0)	0,0,(0)	SRR317044(2;1),
chr1	3563386	-	canonical	TGCTG(A*)T	A	3563346	-40	expected	9	8	yes	yes	yes	0,0,(9)	0,0,(8)	0,0,(9)	0,0,(8)	SRR534332(1;1),SRR317043(1;1),SRR317048(1;1),SRR534333(1;1),SRR545718(2;1),SRR534317(1;1),SRR317042(2;2),
chr1	3701787	-	canonical	TGCTC(A*)T	A	3701767	-20	expected	2	1	no	no	yes	2,0,(0)	1,0,(0)	0,0,(0)	0,0,(0)	SRR545690(2;1),
chr1	8074475	-	canonical	TATTA(A*)T	A	8074456	-19	expected	5	3	yes	yes	yes	0,4,(1)	0,2,(1)	0,4,(1)	0,2,(1)	SRR317062(1;1),SRR315320(2;1),SRR545694(2;1),
chr1	9804081	-	canonical	TACCC(A*)T	A	9804063	-18	expected	2	1	yes	no	yes	0,0,(2)	0,0,(1)	0,0,(2)	0,0,(1)	SRR534326(2;1),
chr1	11140684	-	canonical	TACTG(G*)C	G	11140606	-78	distal	1	1	no	no	yes	0,0,(1)	0,0,(1)	0,0,(0)	0,0,(0)	SRR545723(1;1),
chr1	11158240	-	canonical	TGTAA(A*)C	A	11158213	-27	expected	2	2	yes	no	yes	0,2,(0)	0,2,(0)	0,2,(0)	0,2,(0)	SRR545718(2;2),
chr1	11169805	-	canonical	TGTTA(A*)T	A	11169786	-19	expected	2	1	yes	no	yes	0,0,(2)	0,0,(1)	0,0,(2)	0,0,(1)	SRR307931(2;1),
chr1	11181424	-	canonical	TGCAG(A*)T	A	11177143	-4281	distal	1	1	no	no	yes	1,0,(0)	1,0,(0)	0,0,(0)	0,0,(0)	SRR317065(1;1),
chr1	11734900	-	canonical	TGCTG(A*)C	A	11734873	-27	expected	2	1	yes	no	yes	0,0,(2)	0,0,(1)	0,0,(2)	0,0,(1)	SRR315321(2;1),
chr1	11980412	-	canonical	TAATC(A*)C	A	11980389	-23	expected	1	1	no	no	yes	0,0,(1)	0,0,(1)	0,0,(0)	0,0,(0)	SRR307914(1;1),
chr1	15819558	-	canonical	AACTC(A*)C	A	15819530	-28	expected	1	1	yes	no	yes	0,0,(1)	0,0,(1)	0,0,(1)	0,0,(1)	SRR317050(1;1),
chr1	16621441	-	canonical	TTTTC(A*)C	A	16621412	-29	expected	1	1	no	no	yes	0,0,(1)	0,0,(1)	0,0,(0)	0,0,(0)	SRR307931(1;1),
chr1	19419434	-	canonical	TGCTA(A*)T	A	19419412	-22	expected	3	2	no	yes	yes	3,0,(0)	2,0,(0)	0,0,(0)	0,0,(0)	SRR317036(1;1),SRR545720(2;1),
chr1	19420651	-	canonical	TGTTC(A*)C	A	19420633	-18	expected	1	1	yes	no	yes	0,0,(1)	0,0,(1)	0,0,(1)	0,0,(1)	SRR545716(1;1),
chr1	19439391	-	canonical	TGCTA(A*)T	A	19439361	-30	expected	9	8	yes	yes	yes	1,3,(5)	1,3,(4)	0,1,(5)	0,1,(4)	SRR545709(1;1),SRR315318(1;1),SRR315309(1;1),SRR317062(2;1),SRR315305(2;2),SRR317039(1;1),SRR317042(1;1),
chr1	19441465	-	canonical	TACTG(A*)C	A	19441443	-22	expected	1	1	no	no	yes	1,0,(0)	1,0,(0)	0,0,(0)	0,0,(0)	SRR317062(1;1),
chr1	19467405	-	canonical	TGCTC(A*)C	A	19467386	-19	expected	1	1	no	no	yes	1,0,(0)	1,0,(0)	0,0,(0)	0,0,(0)	SRR317044(1;1),
chr1	19481590	-	canonical	TGCAA(A*)T	A	19481572	-18	expected	1	1	yes	no	yes	1,0,(0)	1,0,(0)	1,0,(0)	1,0,(0)	SRR545706(1;1),
chr1	19482944	-	canonical	TTTTC(A*)C	A	19482917	-27	expected	1	1	no	no	yes	0,0,(1)	0,0,(1)	0,0,(0)	0,0,(0)	SRR307930(1;1),
chr1	19486802	-	canonical	TTTTC(A*)C	A	19486775	-27	expected	2	2	yes	yes	yes	0,1,(1)	0,1,(1)	0,1,(1)	0,1,(1)	SRR534327(2;2),
chr1	19490961	-	canonical	TATTC(A*)C	A	19490935	-26	expected	2	2	yes	yes	yes	0,0,(2)	0,0,(2)	0,0,(2)	0,0,(2)	SRR317049(1;1),SRR317064(1;1),
chr1	19491516	-	canonical	TACTG(A*)C	A	19491491	-25	expected	4	4	yes	yes	yes	4,0,(0)	4,0,(0)	1,0,(0)	1,0,(0)	SRR315311(1;1),SRR317043(1;1),SRR307931(1;1),SRR317049(1;1),
chr1	19566957	-	canonical	TGTTA(A*)C	A	19566940	-17	expected	3	1	no	no	yes	0,3,(0)	0,1,(0)	0,0,(0)	0,0,(0)	SRR545719(3;1),
chr1	19570532	-	canonical	TAGTA(A*)T	A	19570509	-23	expected	1	1	no	no	yes	0,1,(0)	0,1,(0)	0,0,(0)	0,0,(0)	SRR317049(1;1),
chr1	19670944	-	canonical	CGCTG(A*)C	A	19670928	-16	expected	5	2	yes	yes	yes	4,0,(1)	1,0,(1)	0,0,(1)	0,0,(1)	SRR534289(1;1),SRR545720(4;1),
chr1	21050247	-	canonical	TTCTG(A*)C	A	21050227	-20	expected	3	1	no	no	yes	3,0,(0)	1,0,(0)	0,0,(0)	0,0,(0)	SRR534317(3;1),
chr1	21058103	-	canonical	TCCTC(A*)C	A	21054579	-3524	distal	1	1	yes	no	yes	0,0,(1)	0,0,(1)	0,0,(1)	0,0,(1)	SRR545708(1;1),
chr1	21103270	-	canonical	TGCTT(A*)T	A	21103243	-27	expected	4	1	no	no	yes	0,4,(0)	0,1,(0)	0,0,(0)	0,0,(0)	SRR534318(4;1),
chr1	22047688	-	canonical	TACTT(A*)T	A	22047659	-29	expected	1	1	no	no	yes	0,1,(0)	0,1,(0)	0,0,(0)	0,0,(0)	SRR307921(1;1),
chr1	22160446	-	canonical	TGTTG(A*)T	A	22160418	-28	expected	3	2	yes	yes	yes	0,0,(3)	0,0,(2)	0,0,(3)	0,0,(2)	SRR317067(2;1),SRR545718(1;1),
chr1	22169961	-	canonical	AGCTC(A*)C	A	22169931	-30	expected	23	9	yes	yes	yes	0,0,(23)	0,0,(9)	0,0,(18)	0,0,(6)	SRR315317(1;1),SRR545702(4;1),SRR545718(2;1),SRR545707(1;1),SRR545717(5;3),SRR545708(3;1),SRR545685(7;1),
chr1	22181495	-	canonical	AGCTG(A*)C	A	22181476	-19	expected	1	1	yes	no	yes	0,0,(1)	0,0,(1)	0,0,(1)	0,0,(1)	SRR545708(1;1),
chr1	22198895	-	canonical	GGCTG(A*)C	A	22198870	-25	expected	1	1	no	no	yes	1,0,(0)	1,0,(0)	0,0,(0)	0,0,(0)	SRR545718(1;1),
chr1	22200528	-	canonical	TCCTG(A*)C	A	22200504	-24	expected	13	8	no	yes	yes	11,0,(2)	7,0,(1)	0,0,(0)	0,0,(0)	SRR317068(1;1),SRR545718(2;1),SRR307931(1;1),SRR545713(3;1),SRR317067(3;2),SRR317062(3;2),
chr1	22222482	-	canonical	TGCTG(A*)T	A	22222459	-23	expected	2	2	no	yes	yes	2,0,(0)	2,0,(0)	0,0,(0)	0,0,(0)	SRR317050(1;1),SRR317065(1;1),
chr1	23645205	-	canonical	GGCTT(A*)T	A	23645190	-15	expected	5	2	yes	yes	yes	0,0,(5)	0,0,(2)	0,0,(4)	0,0,(1)	SRR317049(1;1),SRR545694(4;1),
chr1	23767991	-	canonical	TGGTG(A*)T	A	23767966	-25	expected	4	2	yes	yes	yes	0,3,(1)	0,1,(1)	0,3,(1)	0,1,(1)	SRR545686(3;1),SRR315317(1;1),
chr1	24432596	-	canonical	GGCTC(A*)C	A	24432567	-29	expected	2	1	yes	no	yes	0,0,(2)	0,0,(1)	0,0,(2)	0,0,(1)	SRR317048(2;1),
chr1	24706336	-	canonical	TGCTG(A*)T	A	24706313	-23	expected	1	1	no	no	yes	1,0,(0)	1,0,(0)	0,0,(0)	0,0,(0)	SRR317055(1;1),
chr1	25570863	-	canonical	TGTTG(G*)T	G	25570715	-148	distal	1	1	no	no	yes	0,1,(0)	0,1,(0)	0,0,(0)	0,0,(0)	SRR315306(1;1),
chr1	27734863	-	canonical	TCCTC(A*)C	A	27734840	-23	expected	3	1	no	no	yes	0,3,(0)	0,1,(0)	0,0,(0)	0,0,(0)	SRR545718(3;1),
chr1	28555561	-	canonical	TATTA(A*)T	A	28555534	-27	expected	1	1	yes	no	yes	0,0,(1)	0,0,(1)	0,0,(1)	0,0,(1)	SRR317059(1;1),
chr1	28906515	-	canonical	TTTTC(A*)C	A	28906493	-22	expected	3	2	no	yes	yes	0,0,(3)	0,0,(2)	0,0,(0)	0,0,(0)	SRR545716(2;1),SRR545702(1;1),
chr1	28907186	-	canonical	TGTTC(A*)T	A	28907158	-28	expected	10	8	yes	yes	yes	1,1,(8)	1,1,(6)	0,1,(8)	0,1,(6)	SRR545720(2;1),SRR317043(2;1),SRR315311(1;1),SRR315312(1;1),SRR317042(1;1),SRR534289(1;1),SRR317054(2;2),
chr1	29487055	-	canonical	TACCA(A*)C	A	29487029	-26	expected	2	1	no	no	yes	0,2,(0)	0,1,(0)	0,0,(0)	0,0,(0)	SRR545717(2;1),
chr1	31418366	-	canonical	TGCTT(G*)C	G	31418330	-36	expected	6	1	yes	no	yes	0,0,(6)	0,0,(1)	0,0,(6)	0,0,(1)	SRR545685(6;1),
chr1	31423126	-	canonical	TGTTT(A*)C	A	31423108	-18	expected	1	1	yes	no	yes	0,0,(1)	0,0,(1)	0,0,(1)	0,0,(1)	SRR545687(1;1),
chr1	31754368	-	canonical	TGCTG(A*)T	A	31754343	-25	expected	7	4	no	yes	yes	5,2,(0)	2,2,(0)	0,0,(0)	0,0,(0)	SRR545701(3;1),SRR534335(2;1),SRR545718(2;2),
chr1	32096487	-	canonical	TGCTC(A*)T	A	32096443	-44	expected	6	2	yes	yes	yes	0,0,(6)	0,0,(2)	0,0,(6)	0,0,(2)	SRR534318(5;1),SRR534317(1;1),
chr1	33252051	-	canonical	TCCTT(A*)T	A	33252048	-3	proximal	2	1	no	no	yes	0,2,(0)	0,1,(0)	0,0,(0)	0,0,(0)	SRR534311(2;1),
chr1	35470903	-	canonical	TGCTT(A*)T	A	35470873	-30	expected	1	1	yes	no	yes	0,0,(1)	0,0,(1)	0,0,(1)	0,0,(1)	SRR545714(1;1),
chr1	35642089	-	canonical	TAATC(A*)T	A	35642075	-14	expected	3	2	yes	yes	yes	0,0,(3)	0,0,(2)	0,0,(2)	0,0,(1)	SRR534326(2;1),SRR317045(1;1),
chr1	36069001	-	canonical	TGTTG(A*)C	A	36068975	-26	expected	3	2	no	yes	yes	3,0,(0)	2,0,(0)	0,0,(0)	0,0,(0)	SRR317059(1;1),SRR545707(2;1),
chr1	37962375	-	canonical	TATTA(A*)T	A	37962337	-38	expected	1	1	yes	no	yes	0,0,(1)	0,0,(1)	0,0,(1)	0,0,(1)	SRR307930(1;1),
chr1	38453530	-	canonical	TTCTG(A*)T	A	38453508	-22	expected	1	1	yes	no	yes	0,0,(1)	0,0,(1)	0,0,(1)	0,0,(1)	SRR545720(1;1),
chr1	40027480	-	canonical	CACTG(A*)C	A	40027459	-21	expected	3	2	yes	yes	yes	2,0,(1)	1,0,(1)	0,0,(1)	0,0,(1)	SRR317038(1;1),SRR307931(2;1),
chr1	40035383	-	canonical	TACTA(A*)T	A	40035361	-22	expected	5	4	no	yes	yes	0,5,(0)	0,4,(0)	0,0,(0)	0,0,(0)	SRR534289(2;1),SRR317062(1;1),SRR307914(2;2),
chr1	40313002	-	canonical	TGCTT(A*)C	A	40312969	-33	expected	2	1	yes	no	yes	0,0,(2)	0,0,(1)	0,0,(2)	0,0,(1)	SRR317044(2;1),
chr1	40313349	-	canonical	TGCTG(A*)T	A	40313332	-17	expected	11	3	no	yes	yes	11,0,(0)	3,0,(0)	0,0,(0)	0,0,(0)	SRR545702(4;1),SRR534334(6;1),SRR545704(1;1),
chr1	42654624	-	canonical	TGCTA(A*)C	A	42654599	-25	expected	6	2	yes	yes	yes	6,0,(0)	2,0,(0)	6,0,(0)	2,0,(0)	SRR545715(4;1),SRR545716(2;1),
chr1	43214009	-	canonical	TGCTA(A*)C	A	43213988	-21	expected	1	1	yes	no	yes	0,0,(1)	0,0,(1)	0,0,(1)	0,0,(1)	SRR317047(1;1),
chr1	43396083	-	canonical	TTCTC(A*)C	A	43395706	-377	distal	2	1	yes	no	yes	0,0,(2)	0,0,(1)	0,0,(2)	0,0,(1)	SRR307913(2;1),
chr1	43396901	-	canonical	TGCTC(A*)C	A	43396877	-24	expected	1	1	yes	no	yes	0,0,(1)	0,0,(1)	0,0,(1)	0,0,(1)	SRR545717(1;1),
chr1	43630499	-	canonical	TAGTG(A*)T	A	43630476	-23	expected	1	1	yes	no	yes	0,1,(0)	0,1,(0)	0,1,(0)	0,1,(0)	SRR317042(1;1),
chr1	43831069	-	canonical	TCCTG(A*)T	A	43831047	-22	expected	1	1	no	no	yes	1,0,(0)	1,0,(0)	0,0,(0)	0,0,(0)	SRR317050(1;1),
chr1	45960873	-	canonical	TGCTG(A*)T	A	45960838	-35	expected	1	1	no	no	yes	1,0,(0)	1,0,(0)	0,0,(0)	0,0,(0)	SRR317043(1;1),
chr1	46656480	-	canonical	TGCTG(A*)T	A	46656456	-24	expected	4	1	no	no	yes	4,0,(0)	1,0,(0)	0,0,(0)	0,0,(0)	SRR545706(4;1),
chr1	51822549	-	canonical	TATTT(A*)T	A	51822518	-31	expected	1	1	no	no	yes	0,1,(0)	0,1,(0)	0,0,(0)	0,0,(0)	SRR545687(1;1),
chr1	52257358	-	canonical	AGCTC(A*)T	A	52257333	-25	expected	8	2	yes	yes	yes	0,0,(8)	0,0,(2)	0,0,(8)	0,0,(2)	SRR534318(6;1),SRR534289(2;1),
chr1	52275102	-	canonical	TGTTT(A*)T	A	52275073	-29	expected	6	2	no	yes	yes	1,5,(0)	1,1,(0)	0,0,(0)	0,0,(0)	SRR545719(5;1),SRR534289(1;1),
chr1	52282081	-	canonical	TTCTG(A*)C	A	52282061	-20	expected	10	2	yes	yes	yes	0,0,(10)	0,0,(2)	0,0,(10)	0,0,(2)	SRR545685(9;1),SRR545709(1;1),
chr1	52507288	-	canonical	TGCTT(A*)T	A	52507269	-19	expected	3	1	yes	no	yes	0,0,(3)	0,0,(1)	0,0,(3)	0,0,(1)	SRR534318(3;1),
chr1	52821122	-	canonical	TGCTT(A*)G	A	52821121	-1	proximal	2	1	no	no	yes	2,0,(0)	1,0,(0)	0,0,(0)	0,0,(0)	SRR317049(2;1),
chr1	52849632	-	canonical	TCCTC(A*)C	A	52849609	-23	expected	2	2	yes	yes	yes	0,0,(2)	0,0,(2)	0,0,(1)	0,0,(1)	SRR317043(1;1),SRR317040(1;1),
chr1	52862070	-	canonical	GGCTC(A*)T	A	52862036	-34	expected	2	1	yes	no	yes	0,0,(2)	0,0,(1)	0,0,(2)	0,0,(1)	SRR317042(2;1),
chr1	55549587	-	canonical	TCTTC(A*)T	A	55549561	-26	expected	1	1	yes	no	yes	0,0,(1)	0,0,(1)	0,0,(1)	0,0,(1)	SRR317042(1;1),
chr1	56962374	-	canonical	TACTG(A*)C	A	56962348	-26	expected	1	1	no	no	yes	1,0,(0)	1,0,(0)	0,0,(0)	0,0,(0)	SRR317055(1;1),
chr1	62953115	-	canonical	TTTTT(A*)T	A	62953083	-32	expected	1	1	no	no	yes	1,0,(0)	1,0,(0)	0,0,(0)	0,0,(0)	SRR545721(1;1),
chr1	70761969	-	canonical	TTTTT(A*)T	A	70761944	-25	expected	2	2	yes	yes	yes	0,0,(2)	0,0,(2)	0,0,(2)	0,0,(2)	SRR317054(1;1),SRR545717(1;1),
chr1	70781270	-	canonical	TAGTT(A*)T	A	70781249	-21	expected	1	1	no	no	yes	0,0,(1)	0,0,(1)	0,0,(0)	0,0,(0)	SRR534326(1;1),
chr1	78046753	-	canonical	TGCAG(A*)T	A	78045313	-1440	distal	2	1	no	no	yes	2,0,(0)	1,0,(0)	0,0,(0)	0,0,(0)	SRR545705(2;1),
chr1	78422408	-	canonical	TGCAA(A*)C	A	78422385	-23	expected	1	1	yes	no	yes	1,0,(0)	1,0,(0)	1,0,(0)	1,0,(0)	SRR534312(1;1),
chr1	78429430	-	canonical	TGCTG(A*)C	A	78429400	-30	expected	1	1	no	no	yes	1,0,(0)	1,0,(0)	0,0,(0)	0,0,(0)	SRR545690(1;1),
chr1	85817287	-	canonical	TGCTC(A*)C	A	85817262	-25	expected	3	1	yes	no	yes	0,0,(3)	0,0,(1)	0,0,(3)	0,0,(1)	SRR545701(3;1),
chr1	89586006	-	canonical	TGCTA(G*)T	G	89585971	-35	expected	3	1	no	no	yes	3,0,(0)	1,0,(0)	0,0,(0)	0,0,(0)	SRR545690(3;1),
chr1	92185811	-	canonical	TGCTG(A*)T	A	92185787	-24	expected	16	4	yes	yes	yes	15,0,(1)	3,0,(1)	0,0,(1)	0,0,(1)	SRR317051(1;1),SRR545712(14;2),SRR545717(1;1),
chr1	92732328	-	canonical	TGTTT(A*)C	A	92732298	-30	expected	1	1	yes	no	yes	0,0,(1)	0,0,(1)	0,0,(1)	0,0,(1)	SRR545688(1;1),
chr1	94049710	-	canonical	TAGTA(A*)C	A	94049678	-32	expected	5	1	no	no	yes	0,5,(0)	0,1,(0)	0,0,(0)	0,0,(0)	SRR534326(5;1),
chr1	94057970	-	canonical	AGCTC(A*)T	A	94057950	-20	expected	7	4	yes	yes	yes	0,0,(7)	0,0,(4)	0,0,(7)	0,0,(4)	SRR534318(3;1),SRR317055(1;1),SRR545723(1;1),SRR317059(2;1),
chr1	103354210	-	canonical	TATTT(A*)T	A	103354186	-24	expected	3	1	yes	no	yes	0,0,(3)	0,0,(1)	0,0,(3)	0,0,(1)	SRR545714(3;1),
chr1	109486724	-	canonical	TAGTA(A*)T	A	109486679	-45	expected	1	1	no	no	yes	0,1,(0)	0,1,(0)	0,0,(0)	0,0,(0)	SRR317054(1;1),
chr1	109823139	-	canonical	TGCTA(A*)C	A	109823111	-28	expected	1	1	no	no	yes	1,0,(0)	1,0,(0)	0,0,(0)	0,0,(0)	SRR315310(1;1),
chr1	110949057	-	canonical	TACTT(A*)T	A	110949001	-56	expected	12	5	yes	yes	yes	0,0,(12)	0,0,(5)	0,0,(12)	0,0,(5)	SRR317036(4;2),SRR545691(1;1),SRR315309(1;1),SRR545712(6;1),
chr1	111990224	-	canonical	AGCTC(A*)T	A	111990198	-26	expected	1	1	yes	no	yes	0,0,(1)	0,0,(1)	0,0,(1)	0,0,(1)	SRR545692(1;1),
chr1	114951383	-	canonical	TATTC(A*)T	A	114951362	-21	expected	4	2	yes	yes	yes	0,0,(4)	0,0,(2)	0,0,(4)	0,0,(2)	SRR545690(1;1),SRR545718(3;1),
chr1	114968368	-	canonical	TGCAA(A*)T	A	114968345	-23	expected	3	2	yes	yes	yes	0,0,(3)	0,0,(2)	0,0,(3)	0,0,(2)	SRR545690(2;1),SRR545689(1;1),
chr1	115261385	-	canonical	TTCTC(A*)T	A	115261366	-19	expected	1	1	yes	no	yes	0,0,(1)	0,0,(1)	0,0,(1)	0,0,(1)	SRR317064(1;1),
chr1	115263365	-	canonical	TACTA(G*)C	G	115263338	-27	expected	2	1	yes	no	yes	0,2,(0)	0,1,(0)	0,2,(0)	0,1,(0)	SRR545714(2;1),
chr1	120166768	-	canonical	TAGTA(A*)T	A	120166739	-29	expected	8	5	no	yes	yes	0,8,(0)	0,5,(0)	0,0,(0)	0,0,(0)	SRR534317(2;1),SRR315320(2;1),SRR534289(1;1),SRR317045(3;2),
chr1	120464457	-	canonical	TTCTT(A*)T	A	120464432	-25	expected	3	2	yes	yes	yes	0,0,(3)	0,0,(2)	0,0,(3)	0,0,(2)	SRR545694(2;1),SRR317051(1;1),
chr1	144881646	-	canonical	TCCTG(A*)T	A	144881622	-24	expected	1	1	yes	no	yes	0,0,(1)	0,0,(1)	0,0,(1)	0,0,(1)	SRR545718(1;1),
chr1	144903237	-	canonical	GGCTA(A*)T	A	144903204	-33	expected	1	1	yes	no	yes	0,1,(0)	0,1,(0)	0,1,(0)	0,1,(0)	SRR545701(1;1),
chr1	149882278	-	canonical	TGCTG(A*)T	A	149882255	-23	expected	1	1	no	no	yes	1,0,(0)	1,0,(0)	0,0,(0)	0,0,(0)	SRR534326(1;1),
chr1	149895620	-	canonical	TGCAG(G*)T	G	149885739	-9881	distal	1	1	yes	no	yes	0,0,(1)	0,0,(1)	0,0,(1)	0,0,(1)	SRR317049(1;1),
chr1	150785836	-	canonical	TGTTT(A*)T	A	150785814	-22	expected	2	1	yes	no	yes	0,0,(2)	0,0,(1)	0,0,(2)	0,0,(1)	SRR545706(2;1),
chr1	150808993	-	canonical	TATTA(A*)C	A	150808969	-24	expected	2	1	yes	no	yes	0,0,(2)	0,0,(1)	0,0,(2)	0,0,(1)	SRR545716(2;1),
chr1	150939137	-	canonical	TGCTC(T*)T	T	150939105	-32	expected	2	2	yes	yes	yes	0,0,(2)	0,0,(2)	0,0,(1)	0,0,(1)	SRR317065(1;1),SRR317064(1;1),
chr1	151026827	-	canonical	GACTT(A*)C	A	151026797	-30	expected	1	1	yes	no	yes	0,0,(1)	0,0,(1)	0,0,(1)	0,0,(1)	SRR545720(1;1),
chr1	153580185	-	canonical	TGCTG(A*)C	A	153580168	-17	expected	2	1	no	no	yes	2,0,(0)	1,0,(0)	0,0,(0)	0,0,(0)	SRR534318(2;1),
chr1	153603630	-	canonical	TACTG(A*)C	A	153603587	-43	expected	2	1	no	no	yes	2,0,(0)	1,0,(0)	0,0,(0)	0,0,(0)	SRR545701(2;1),
chr1	153635293	-	canonical	TGCTT(A*)C	A	153635271	-22	expected	28	13	yes	yes	yes	3,1,(24)	1,1,(11)	0,0,(24)	0,0,(11)	SRR545713(3;1),SRR545719(12;2),SRR317042(3;2),SRR534317(1;1),SRR545714(2;1),SRR317050(2;2),SRR317055(1;1),SRR545720(2;1),SRR307930(2;2),
chr1	153924950	-	canonical	TCCTC(A*)T	A	153924922	-28	expected	1	1	yes	no	yes	0,0,(1)	0,0,(1)	0,0,(1)	0,0,(1)	SRR317038(1;1),
chr1	153925863	-	canonical	AGCTC(A*)T	A	153925845	-18	expected	11	4	yes	yes	yes	0,0,(11)	0,0,(4)	0,0,(11)	0,0,(4)	SRR545694(3;1),SRR317063(1;1),SRR545693(6;1),SRR534289(1;1),
chr1	153926793	-	canonical	TGTTC(A*)C	A	153926792	-1	proximal	4	1	no	no	yes	0,0,(4)	0,0,(1)	0,0,(0)	0,0,(0)	SRR315303(4;1),
chr1	154148780	-	canonical	TAGTT(A*)T	A	154148724	-56	expected	1	1	yes	no	yes	0,0,(1)	0,0,(1)	0,0,(1)	0,0,(1)	SRR317054(1;1),
chr1	154558363	-	canonical	TATAT(A*)T	A	154558341	-22	expected	4	2	yes	yes	yes	0,0,(4)	0,0,(2)	0,0,(4)	0,0,(2)	SRR545704(3;1),SRR317043(1;1),
chr1	154558375	-	canonical	TGCAA(A*)C	A	154558341	-34	expected	5	1	no	no	yes	5,0,(0)	1,0,(0)	0,0,(0)	0,0,(0)	SRR545713(5;1),
chr1	154571085	-	canonical	TGTTC(A*)C	A	154571061	-24	expected	5	4	yes	yes	yes	0,0,(5)	0,0,(4)	0,0,(5)	0,0,(4)	SRR315318(1;1),SRR307922(1;1),SRR315310(1;1),SRR534317(2;1),
chr1	155223549	-	canonical	TCCTG(A*)C	A	155223523	-26	expected	1	1	no	no	yes	1,0,(0)	1,0,(0)	0,0,(0)	0,0,(0)	SRR307931(1;1),
chr1	155233857	-	canonical	TTCTG(A*)T	A	155233831	-26	expected	10	4	yes	yes	yes	9,0,(1)	3,0,(1)	0,0,(1)	0,0,(1)	SRR534289(1;1),SRR317046(1;1),SRR317057(8;2),
chr1	155730455	-	canonical	TGTTG(A*)T	A	155730432	-23	expected	1	1	yes	no	yes	0,0,(1)	0,0,(1)	0,0,(1)	0,0,(1)	SRR315305(1;1),
chr1	155884381	-	canonical	TGCTA(A*)C	A	155884111	-270	distal	1	1	yes	no	yes	0,0,(1)	0,0,(1)	0,0,(1)	0,0,(1)	SRR545707(1;1),
chr1	155886553	-	canonical	TGCTA(A*)T	A	155886528	-25	expected	2	1	no	no	yes	2,0,(0)	1,0,(0)	0,0,(0)	0,0,(0)	SRR545721(2;1),
chr1	155887498	-	canonical	TTCTC(A*)C	A	155887463	-35	expected	8	5	yes	yes	yes	0,0,(8)	0,0,(5)	0,0,(8)	0,0,(5)	SRR317043(1;1),SRR545718(6;3),SRR317042(1;1),
chr1	155922047	-	canonical	TTCTC(A*)C	A	155922026	-21	expected	6	3	yes	yes	yes	0,0,(6)	0,0,(3)	0,0,(6)	0,0,(3)	SRR307914(2;1),SRR545718(4;2),
chr1	156220830	-	canonical	TGCTA(A*)T	A	156220787	-43	expected	5	2	yes	yes	yes	0,0,(5)	0,0,(2)	0,0,(5)	0,0,(2)	SRR307913(4;1),SRR317049(1;1),
chr1	156222888	-	canonical	TACCC(A*)C	A	156222869	-19	expected	3	2	yes	yes	yes	0,3,(0)	0,2,(0)	0,3,(0)	0,2,(0)	SRR317062(2;1),SRR317064(1;1),
chr1	156223321	-	canonical	TCCTT(A*)C	A	156223299	-22	expected	1	1	yes	no	yes	0,0,(1)	0,0,(1)	0,0,(1)	0,0,(1)	SRR317036(1;1),
chr1	156233398	-	canonical	TGTTT(A*)T	A	156233361	-37	expected	1	1	yes	no	yes	0,0,(1)	0,0,(1)	0,0,(1)	0,0,(1)	SRR315310(1;1),
chr1	156449161	-	canonical	AGCTC(A*)T	A	156449138	-23	expected	3	3	yes	yes	yes	0,0,(3)	0,0,(3)	0,0,(2)	0,0,(2)	SRR317052(1;1),SRR307922(2;2),
chr1	156643345	-	canonical	GGCTG(A*)C	A	156643319	-26	expected	1	1	no	no	yes	0,0,(1)	0,0,(1)	0,0,(0)	0,0,(0)	SRR545717(1;1),
chr1	156707946	-	canonical	TTCTG(A*)C	A	156707926	-20	expected	1	1	yes	no	yes	0,0,(1)	0,0,(1)	0,0,(1)	0,0,(1)	SRR317063(1;1),
chr1	156917291	-	canonical	TGCTG(A*)T	A	156917242	-49	expected	1	1	no	no	yes	1,0,(0)	1,0,(0)	0,0,(0)	0,0,(0)	SRR317050(1;1),
chr1	156928688	-	canonical	TGTAT(A*)T	A	156928656	-32	expected	6	5	yes	yes	yes	0,0,(6)	0,0,(5)	0,0,(6)	0,0,(5)	SRR317067(1;1),SRR317062(2;1),SRR317050(2;2),SRR317054(1;1),
chr1	156939871	-	canonical	GGCTC(A*)C	A	156939835	-36	expected	2	1	yes	no	yes	0,0,(2)	0,0,(1)	0,0,(2)	0,0,(1)	SRR545705(2;1),
chr1	158596830	-	canonical	TGCAC(A*)T	A	158596797	-33	expected	1	1	yes	no	yes	1,0,(0)	1,0,(0)	1,0,(0)	1,0,(0)	SRR317052(1;1),
chr1	158624562	-	canonical	GACTG(A*)C	A	158624538	-24	expected	1	1	no	no	yes	0,1,(0)	0,1,(0)	0,0,(0)	0,0,(0)	SRR315309(1;1),
chr1	159889189	-	canonical	GGCTG(A*)C	A	159889166	-23	expected	12	6	yes	yes	yes	10,0,(2)	5,0,(1)	0,0,(2)	0,0,(1)	SRR317064(1;1),SRR317043(1;1),SRR545714(3;1),SRR545707(4;1),SRR545719(2;1),SRR317042(1;1),
chr1	159889653	-	canonical	TTCTC(A*)C	A	159889625	-28	expected	5	5	yes	yes	yes	0,0,(5)	0,0,(5)	0,0,(4)	0,0,(4)	SRR317050(1;1),SRR317044(1;1),SRR317065(1;1),SRR315310(1;1),SRR534318(1;1),
chr1	159890356	-	canonical	TGTTG(A*)C	A	159890327	-29	expected	1	1	yes	no	yes	0,0,(1)	0,0,(1)	0,0,(1)	0,0,(1)	SRR307921(1;1),
chr1	160252011	-	canonical	TGCTC(A*)C	A	160251990	-21	expected	1	1	yes	no	yes	0,0,(1)	0,0,(1)	0,0,(1)	0,0,(1)	SRR317049(1;1),
chr1	160275380	-	canonical	CACTC(A*)T	A	160275361	-19	expected	1	1	yes	no	yes	0,0,(1)	0,0,(1)	0,0,(1)	0,0,(1)	SRR317065(1;1),
chr1	160283937	-	canonical	TGATG(A*)C	A	160283915	-22	expected	1	1	yes	no	yes	0,0,(1)	0,0,(1)	0,0,(1)	0,0,(1)	SRR315305(1;1),
chr1	160580610	-	canonical	TACTC(A*)C	A	160580588	-22	expected	1	1	yes	no	yes	0,0,(1)	0,0,(1)	0,0,(1)	0,0,(1)	SRR545688(1;1),
chr1	160969221	-	canonical	CACTC(A*)T	A	160969198	-23	expected	2	2	yes	yes	yes	0,0,(2)	0,0,(2)	0,0,(1)	0,0,(1)	SRR315310(1;1),SRR317043(1;1),
chr1	160969227	-	canonical	TGCTG(A*)C	A	160969198	-29	expected	3	2	no	yes	yes	3,0,(0)	2,0,(0)	0,0,(0)	0,0,(0)	SRR307913(1;1),SRR317043(2;1),
chr1	161164069	-	canonical	TGCTG(G*)C	G	161164011	-58	expected	1	1	no	no	yes	1,0,(0)	1,0,(0)	0,0,(0)	0,0,(0)	SRR545717(1;1),
chr1	166029923	-	canonical	TATTT(A*)C	A	166029900	-23	expected	3	1	no	no	yes	0,0,(3)	0,0,(1)	0,0,(0)	0,0,(0)	SRR317044(3;1),
chr1	173834709	-	canonical	TTTTA(A*)T	A	173834685	-24	expected	1	1	yes	no	yes	0,0,(1)	0,0,(1)	0,0,(1)	0,0,(1)	SRR317050(1;1),
chr1	173835366	-	canonical	TGCTG(A*)C	A	173835344	-22	expected	19	12	yes	yes	yes	18,0,(1)	11,0,(1)	0,0,(1)	0,0,(1)	SRR317042(1;1),SRR315309(1;1),SRR317069(1;1),SRR545712(6;1),SRR317050(2;2),SRR317043(3;2),SRR315306(1;1),SRR534326(1;1),SRR317051(3;2),
chr1	173910545	-	canonical	TGATA(A*)C	A	173910518	-27	expected	1	1	yes	no	yes	0,0,(1)	0,0,(1)	0,0,(1)	0,0,(1)	SRR307930(1;1),
chr1	179846532	-	canonical	TACTA(A*)T	A	179846508	-24	expected	1	1	no	no	yes	0,0,(1)	0,0,(1)	0,0,(0)	0,0,(0)	SRR317049(1;1),
chr1	180945803	-	canonical	AGCTA(A*)T	A	180945782	-21	expected	1	1	yes	no	yes	0,0,(1)	0,0,(1)	0,0,(1)	0,0,(1)	SRR317051(1;1),
chr1	182355561	-	canonical	TGATG(G*)C	G	182355537	-24	expected	14	9	yes	yes	yes	0,3,(11)	0,3,(6)	0,0,(5)	0,0,(4)	SRR534326(2;1),SRR307924(1;1),SRR534317(2;1),SRR315321(2;2),SRR534327(4;1),SRR315320(1;1),SRR545690(1;1),SRR545692(1;1),
chr1	184681758	-	canonical	TACTT(A*)T	A	184681732	-26	expected	2	1	yes	no	yes	0,0,(2)	0,0,(1)	0,0,(2)	0,0,(1)	SRR534318(2;1),
chr1	185269694	-	canonical	TTTTT(A*)C	A	185269690	-4	proximal	1	1	no	no	yes	1,0,(0)	1,0,(0)	0,0,(0)	0,0,(0)	SRR317043(1;1),
chr1	186313240	-	canonical	TTCTG(A*)T	A	186313222	-18	expected	1	1	no	no	yes	1,0,(0)	1,0,(0)	0,0,(0)	0,0,(0)	SRR315310(1;1),
chr1	186327802	-	canonical	TTTTC(A*)C	A	186327782	-20	expected	2	1	yes	no	yes	0,0,(2)	0,0,(1)	0,0,(2)	0,0,(1)	SRR545708(2;1),
chr1	186332606	-	canonical	TAGTT(A*)T	A	186332577	-29	expected	4	2	no	yes	yes	0,3,(1)	0,1,(1)	0,0,(0)	0,0,(0)	SRR545688(1;1),SRR545706(3;1),
chr1	186332613	-	canonical	TGTTA(A*)T	A	186332577	-36	expected	3	3	yes	yes	yes	0,0,(3)	0,0,(3)	0,0,(3)	0,0,(3)	SRR317042(2;2),SRR317051(1;1),
chr1	186340194	-	canonical	TATTC(A*)T	A	186340175	-19	expected	1	1	yes	no	yes	0,0,(1)	0,0,(1)	0,0,(1)	0,0,(1)	SRR545707(1;1),
chr1	197062421	-	canonical	TACCC(A*)T	A	197062391	-30	expected	3	3	no	no	yes	3,0,(0)	3,0,(0)	0,0,(0)	0,0,(0)	SRR545686(3;3),
chr1	197093483	-	canonical	TATTT(A*)T	A	197093461	-22	expected	8	6	yes	yes	yes	0,0,(8)	0,0,(6)	0,0,(8)	0,0,(6)	SRR545703(6;5),SRR534318(2;1),
chr1	200559418	-	canonical	TATAA(A*)C	A	200559400	-18	expected	1	1	yes	no	yes	1,0,(0)	1,0,(0)	1,0,(0)	1,0,(0)	SRR317042(1;1),
chr1	200584767	-	canonical	TAGTT(A*)C	A	200584737	-30	expected	4	1	no	no	yes	0,0,(4)	0,0,(1)	0,0,(0)	0,0,(0)	SRR534318(4;1),
chr1	200942738	-	canonical	AGCTG(A*)C	A	200942706	-32	expected	2	1	no	no	yes	2,0,(0)	1,0,(0)	0,0,(0)	0,0,(0)	SRR317049(2;1),
chr1	201121004	-	canonical	TGCAT(A*)C	A	201120980	-24	expected	1	1	yes	no	yes	1,0,(0)	1,0,(0)	1,0,(0)	1,0,(0)	SRR317051(1;1),
chr1	202711663	-	canonical	TTCTT(A*)T	A	202711633	-30	expected	1	1	no	no	yes	0,0,(1)	0,0,(1)	0,0,(0)	0,0,(0)	SRR317059(1;1),
chr1	202894358	-	canonical	TGCTC(A*)T	A	202894335	-23	expected	1	1	yes	no	yes	0,0,(1)	0,0,(1)	0,0,(1)	0,0,(1)	SRR317043(1;1),
chr1	204218122	-	canonical	TGCTC(A*)T	A	204218098	-24	expected	1	1	yes	no	yes	0,0,(1)	0,0,(1)	0,0,(1)	0,0,(1)	SRR317045(1;1),
chr1	204400920	-	canonical	TGCAG(A*)T	A	204399166	-1754	distal	2	2	no	yes	yes	2,0,(0)	2,0,(0)	0,0,(0)	0,0,(0)	SRR534312(1;1),SRR534311(1;1),
chr1	205131363	-	canonical	TGGTG(A*)T	A	205131340	-23	expected	5	2	yes	yes	yes	0,0,(5)	0,0,(2)	0,0,(5)	0,0,(2)	SRR545705(4;1),SRR307930(1;1),
chr1	207223093	-	canonical	TGCAG(A*)T	A	207223068	-25	expected	12	3	yes	yes	yes	12,0,(0)	3,0,(0)	8,0,(0)	1,0,(0)	SRR317062(4;2),SRR545713(8;1),
chr1	208213139	-	canonical	TGCCC(A*)C	A	208213112	-27	expected	3	1	yes	no	yes	0,0,(3)	0,0,(1)	0,0,(3)	0,0,(1)	SRR545708(3;1),
chr1	220152114	-	canonical	AGCTC(A*)T	A	220152061	-53	expected	1	1	yes	no	yes	0,1,(0)	0,1,(0)	0,1,(0)	0,1,(0)	SRR545692(1;1),
chr1	220156121	-	canonical	TACTA(G*)T	G	220154799	-1322	distal	1	1	no	no	yes	0,1,(0)	0,1,(0)	0,0,(0)	0,0,(0)	SRR317042(1;1),
chr1	220157622	-	canonical	TATTT(A*)T	A	220157599	-23	expected	1	1	yes	no	yes	0,0,(1)	0,0,(1)	0,0,(1)	0,0,(1)	SRR534335(1;1),
chr1	220184420	-	canonical	TTTTA(A*)C	A	220184398	-22	expected	6	4	yes	yes	yes	0,0,(6)	0,0,(4)	0,0,(6)	0,0,(4)	SRR545690(5;3),SRR315310(1;1),
chr1	220197823	-	canonical	TACTG(A*)T	A	220197798	-25	expected	2	2	yes	yes	yes	1,0,(1)	1,0,(1)	1,0,(1)	1,0,(1)	SRR545688(1;1),SRR315311(1;1),
chr1	226037798	-	canonical	AGCTC(A*)C	A	226037780	-18	expected	2	1	yes	no	yes	0,0,(2)	0,0,(1)	0,0,(2)	0,0,(1)	SRR317049(2;1),
chr1	226058835	-	canonical	AGCTA(A*)T	A	226058813	-22	expected	9	2	yes	no	yes	0,0,(9)	0,0,(2)	0,0,(9)	0,0,(2)	SRR545715(9;2),
chr1	226109802	-	canonical	CACTC(A*)T	A	226109779	-23	expected	1	1	yes	no	yes	0,0,(1)	0,0,(1)	0,0,(1)	0,0,(1)	SRR317059(1;1),
chr1	226822612	-	canonical	AGCTC(A*)C	A	226822587	-25	expected	6	3	no	yes	yes	0,0,(6)	0,0,(3)	0,0,(0)	0,0,(0)	SRR545717(5;2),SRR317047(1;1),
chr1	227182126	-	canonical	TTCTC(A*)T	A	227182100	-26	expected	6	5	yes	yes	yes	0,0,(6)	0,0,(5)	0,0,(6)	0,0,(5)	SRR317035(1;1),SRR545692(1;1),SRR534289(1;1),SRR317036(1;1),SRR317066(2;1),
chr1	227218202	-	canonical	TCCTA(A*)T	A	227218171	-31	expected	2	1	no	no	yes	2,0,(0)	1,0,(0)	0,0,(0)	0,0,(0)	SRR545708(2;1),
chr1	227223336	-	canonical	TTTTT(A*)T	A	227223308	-28	expected	2	1	yes	no	yes	0,0,(2)	0,0,(1)	0,0,(2)	0,0,(1)	SRR545718(2;1),
chr1	229601286	-	canonical	TGATA(A*)C	A	229601266	-20	expected	5	2	no	yes	yes	5,0,(0)	2,0,(0)	0,0,(0)	0,0,(0)	SRR545685(3;1),SRR545707(2;1),
chr1	231067237	-	canonical	TACTA(A*)T	A	231067218	-19	expected	1	1	no	no	yes	0,1,(0)	0,1,(0)	0,0,(0)	0,0,(0)	SRR545707(1;1),
chr1	231360188	-	canonical	TATTT(A*)T	A	231360160	-28	expected	8	2	yes	yes	yes	0,0,(8)	0,0,(2)	0,0,(7)	0,0,(1)	SRR317056(7;1),SRR307931(1;1),
chr1	231361299	-	canonical	TACTA(A*)T	A	231361269	-30	expected	1	1	yes	no	yes	0,1,(0)	0,1,(0)	0,1,(0)	0,1,(0)	SRR534317(1;1),
chr1	233120247	-	canonical	TGTTC(A*)C	A	233120223	-24	expected	1	1	yes	no	yes	0,0,(1)	0,0,(1)	0,0,(1)	0,0,(1)	SRR317036(1;1),
chr1	235285709	-	canonical	TGTAA(A*)T	A	235285687	-22	expected	4	3	yes	yes	yes	0,4,(0)	0,3,(0)	0,4,(0)	0,3,(0)	SRR317044(1;1),SRR545689(1;1),SRR545690(2;1),
chr1	235344522	-	canonical	TTCTC(A*)C	A	235341228	-3294	distal	1	1	yes	no	yes	0,0,(1)	0,0,(1)	0,0,(1)	0,0,(1)	SRR317043(1;1),
chr1	235892983	-	canonical	TAGTC(A*)T	A	235892957	-26	expected	1	1	no	no	yes	0,0,(1)	0,0,(1)	0,0,(0)	0,0,(0)	SRR545692(1;1),
chr1	878615	+	canonical	TAGTA(A*)C	A	878632	-17	expected	1	1	no	no	yes	0,1,(0)	0,1,(0)	0,0,(0)	0,0,(0)	SRR317049(1;1),
chr1	1335956	+	canonical	TGGTT(A*)C	A	1335984	-28	expected	3	1	no	no	yes	0,0,(3)	0,0,(1)	0,0,(0)	0,0,(0)	SRR545713(3;1),
chr1	1335968	+	canonical	TACTC(A*)T	A	1335984	-16	expected	1	1	yes	no	yes	0,0,(1)	0,0,(1)	0,0,(1)	0,0,(1)	SRR317049(1;1),
chr1	1417904	+	canonical	TGGTC(A*)C	A	1417924	-20	expected	7	5	yes	yes	yes	0,0,(7)	0,0,(5)	0,0,(6)	0,0,(4)	SRR545721(1;1),SRR317042(2;2),SRR545709(1;1),SRR545701(3;1),
chr1	1455907	+	canonical	TGGTC(A*)C	A	1455927	-20	expected	1	1	yes	no	yes	0,0,(1)	0,0,(1)	0,0,(1)	0,0,(1)	SRR317050(1;1),
chr1	2106173	+	canonical	TCCTC(A*)C	A	2106192	-19	expected	1	1	no	no	yes	0,0,(1)	0,0,(1)	0,0,(0)	0,0,(0)	SRR545685(1;1),
chr1	2426906	+	canonical	AGCTC(A*)C	A	2426926	-20	expected	1	1	yes	no	yes	0,0,(1)	0,0,(1)	0,0,(1)	0,0,(1)	SRR545694(1;1),
chr1	2520367	+	canonical	TGGTG(A*)T	A	2520392	-25	expected	1	1	yes	no	yes	0,0,(1)	0,0,(1)	0,0,(1)	0,0,(1)	SRR545717(1;1),
chr1	3382678	+	canonical	GGCTG(A*)C	A	3382711	-33	expected	1	1	no	no	yes	0,0,(1)	0,0,(1)	0,0,(0)	0,0,(0)	SRR317038(1;1),
chr1	9673024	+	canonical	TTCTG(A*)C	A	9673043	-19	expected	2	2	yes	yes	yes	1,0,(1)	1,0,(1)	0,0,(1)	0,0,(1)	SRR317052(1;1),SRR315310(1;1),
chr1	10179550	+	canonical	TCCTC(A*)C	A	10179570	-20	expected	1	1	yes	no	yes	0,0,(1)	0,0,(1)	0,0,(1)	0,0,(1)	SRR545689(1;1),
chr1	10403257	+	canonical	TCTTT(A*)T	A	10403289	-32	expected	1	1	no	no	yes	0,1,(0)	0,1,(0)	0,0,(0)	0,0,(0)	SRR317043(1;1),
chr1	11810093	+	canonical	TTCTC(A*)C	A	11810133	-40	expected	2	1	yes	no	yes	0,0,(2)	0,0,(1)	0,0,(2)	0,0,(1)	SRR545694(2;1),
chr1	11879423	+	canonical	TGCTG(G*)C	G	11879544	-121	distal	1	1	no	no	yes	0,1,(0)	0,1,(0)	0,0,(0)	0,0,(0)	SRR317043(1;1),
chr1	12061430	+	canonical	CACTC(A*)C	A	12061457	-27	expected	4	2	yes	no	yes	0,0,(4)	0,0,(2)	0,0,(3)	0,0,(1)	SRR545721(4;2),
chr1	12065736	+	canonical	AGCTG(A*)T	A	12065767	-31	expected	4	3	yes	yes	yes	3,0,(1)	2,0,(1)	0,0,(1)	0,0,(1)	SRR545703(3;2),SRR534335(1;1),
chr1	12395738	+	canonical	TCTTA(A*)T	A	12395761	-23	expected	1	1	no	no	yes	1,0,(0)	1,0,(0)	0,0,(0)	0,0,(0)	SRR317063(1;1),
chr1	12402934	+	canonical	GGCTG(A*)T	A	12402955	-21	expected	6	3	no	yes	yes	6,0,(0)	3,0,(0)	0,0,(0)	0,0,(0)	SRR317062(4;1),SRR545717(1;1),SRR317043(1;1),
chr1	12406636	+	canonical	TGCTG(A*)C	A	12406661	-25	expected	11	4	yes	yes	yes	0,0,(11)	0,0,(4)	0,0,(11)	0,0,(4)	SRR315312(1;1),SRR545702(7;1),SRR315309(1;1),SRR317067(2;1),
chr1	15890751	+	canonical	TCCTG(A*)C	A	15890777	-26	expected	1	1	no	no	yes	1,0,(0)	1,0,(0)	0,0,(0)	0,0,(0)	SRR317050(1;1),
chr1	15986297	+	canonical	TGCTA(A*)T	A	15986331	-34	expected	1	1	yes	no	yes	0,0,(1)	0,0,(1)	0,0,(1)	0,0,(1)	SRR317042(1;1),
chr1	16044372	+	canonical	TACTC(C*)T	C	16044387	-15	expected	14	8	no	yes	yes	0,14,(0)	0,8,(0)	0,0,(0)	0,0,(0)	SRR317064(1;1),SRR545708(2;1),SRR317062(1;1),SRR317039(1;1),SRR545690(1;1),SRR545707(2;1),SRR534325(1;1),SRR534318(5;1),
chr1	16721642	+	canonical	TGCAG(G*)C	G	16770126	-48484	distal	7	3	no	yes	yes	0,7,(0)	0,3,(0)	0,0,(0)	0,0,(0)	SRR545686(1;1),SRR534289(2;1),SRR534325(4;1),
chr1	16775561	+	canonical	TCCTC(A*)C	A	16775587	-26	expected	3	2	yes	yes	yes	0,0,(3)	0,0,(2)	0,0,(1)	0,0,(1)	SRR307931(1;1),SRR545690(2;1),
chr1	17958794	+	canonical	TGCTG(A*)C	A	17958815	-21	expected	2	1	no	no	yes	2,0,(0)	1,0,(0)	0,0,(0)	0,0,(0)	SRR545694(2;1),
chr1	17966667	+	canonical	TACTC(A*)C	A	17966696	-29	expected	1	1	no	no	yes	0,1,(0)	0,1,(0)	0,0,(0)	0,0,(0)	SRR315318(1;1),
chr1	20234040	+	canonical	TACTC(A*)C	A	20234062	-22	expected	3	1	no	no	yes	0,0,(3)	0,0,(1)	0,0,(0)	0,0,(0)	SRR315307(3;1),
chr1	23409647	+	canonical	TGCCA(A*)T	A	23409671	-24	expected	5	3	yes	yes	yes	0,0,(5)	0,0,(3)	0,0,(5)	0,0,(3)	SRR545718(4;2),SRR545703(1;1),
chr1	24082746	+	canonical	TGTTC(A*)T	A	24082763	-17	expected	5	1	yes	no	yes	0,0,(5)	0,0,(1)	0,0,(5)	0,0,(1)	SRR317049(5;1),
chr1	24989647	+	canonical	TCTTG(A*)C	A	24989673	-26	expected	7	3	yes	yes	yes	0,0,(7)	0,0,(3)	0,0,(7)	0,0,(3)	SRR545685(5;1),SRR534327(1;1),SRR315317(1;1),
chr1	26598482	+	canonical	TGCTC(G*)C	G	26598511	-29	expected	4	1	no	no	yes	4,0,(0)	1,0,(0)	0,0,(0)	0,0,(0)	SRR545705(4;1),
chr1	26603008	+	canonical	TGCTT(A*)C	A	26603025	-17	expected	1	1	yes	no	yes	0,0,(1)	0,0,(1)	0,0,(1)	0,0,(1)	SRR315310(1;1),
chr1	26764635	+	canonical	TGTTC(A*)T	A	26764658	-23	expected	1	1	yes	no	yes	0,0,(1)	0,0,(1)	0,0,(1)	0,0,(1)	SRR317043(1;1),
chr1	26800541	+	canonical	TACTG(A*)T	A	26800575	-34	expected	1	1	no	no	yes	1,0,(0)	1,0,(0)	0,0,(0)	0,0,(0)	SRR317050(1;1),
chr1	27087852	+	canonical	TGCTT(A*)T	A	27087874	-22	expected	2	1	no	no	yes	0,2,(0)	0,1,(0)	0,0,(0)	0,0,(0)	SRR545713(2;1),
chr1	27099814	+	canonical	TGTTC(A*)C	A	27099836	-22	expected	1	1	yes	no	yes	0,0,(1)	0,0,(1)	0,0,(1)	0,0,(1)	SRR315320(1;1),
chr1	27661841	+	canonical	TGCCC(A*)C	A	27661869	-28	expected	5	1	yes	no	yes	0,0,(5)	0,0,(1)	0,0,(5)	0,0,(1)	SRR534318(5;1),
chr1	27720278	+	canonical	TTCTC(A*)C	A	27720297	-19	expected	1	1	no	no	yes	0,0,(1)	0,0,(1)	0,0,(0)	0,0,(0)	SRR545705(1;1),
chr1	28601311	+	canonical	GACTC(A*)C	A	28601335	-24	expected	2	1	yes	no	yes	0,0,(2)	0,0,(1)	0,0,(2)	0,0,(1)	SRR545720(2;1),
chr1	28862755	+	canonical	TGATG(G*)C	G	28862773	-18	expected	1	1	yes	no	yes	0,0,(1)	0,0,(1)	0,0,(1)	0,0,(1)	SRR307922(1;1),
chr1	28863237	+	canonical	TGCTC(A*)T	A	28863258	-21	expected	2	1	yes	no	yes	0,0,(2)	0,0,(1)	0,0,(2)	0,0,(1)	SRR307914(2;1),
chr1	28864327	+	canonical	TACCC(A*)T	A	28864343	-16	expected	1	1	yes	no	yes	0,1,(0)	0,1,(0)	0,1,(0)	0,1,(0)	SRR317049(1;1),
chr1	29068875	+	canonical	TGTTA(A*)T	A	29068914	-39	expected	1	1	no	no	yes	0,1,(0)	0,1,(0)	0,0,(0)	0,0,(0)	SRR315311(1;1),
chr1	32628814	+	canonical	TTCTG(A*)T	A	32628835	-21	expected	1	1	no	no	yes	1,0,(0)	1,0,(0)	0,0,(0)	0,0,(0)	SRR315312(1;1),
chr1	32636275	+	canonical	CACTC(A*)C	A	32636307	-32	expected	1	1	no	no	yes	0,0,(1)	0,0,(1)	0,0,(0)	0,0,(0)	SRR545714(1;1),
chr1	32694302	+	canonical	TACAG(A*)T	A	32694327	-25	expected	1	1	yes	no	yes	0,0,(1)	0,0,(1)	0,0,(1)	0,0,(1)	SRR317059(1;1),
chr1	32796159	+	canonical	TGGTG(A*)C	A	32796178	-19	expected	1	1	yes	no	yes	0,0,(1)	0,0,(1)	0,0,(1)	0,0,(1)	SRR545687(1;1),
chr1	33117488	+	canonical	TGCTA(A*)C	A	33117514	-26	expected	1	1	yes	no	yes	0,0,(1)	0,0,(1)	0,0,(1)	0,0,(1)	SRR317044(1;1),
chr1	35561385	+	canonical	TATTC(A*)C	A	35561419	-34	expected	2	2	yes	yes	yes	0,0,(2)	0,0,(2)	0,0,(1)	0,0,(1)	SRR317042(1;1),SRR534326(1;1),
chr1	35826755	+	canonical	TATTC(A*)T	A	35826794	-39	expected	4	3	yes	yes	yes	1,0,(3)	1,0,(2)	0,0,(2)	0,0,(1)	SRR545720(1;1),SRR317055(1;1),SRR317050(2;1),
chr1	35827195	+	canonical	TATTT(A*)T	A	35827219	-24	expected	4	2	yes	yes	yes	0,0,(4)	0,0,(2)	0,0,(4)	0,0,(2)	SRR545720(3;1),SRR545704(1;1),
chr1	35851649	+	canonical	TACTC(A*)T	A	35851674	-25	expected	1	1	yes	no	yes	0,0,(1)	0,0,(1)	0,0,(1)	0,0,(1)	SRR545709(1;1),
chr1	35863992	+	canonical	TATTT(A*)T	A	35864013	-21	expected	1	1	yes	no	yes	0,0,(1)	0,0,(1)	0,0,(1)	0,0,(1)	SRR317042(1;1),
chr1	36521219	+	canonical	TGTTC(A*)T	A	36521237	-18	expected	2	2	no	yes	yes	0,0,(2)	0,0,(2)	0,0,(0)	0,0,(0)	SRR317043(1;1),SRR534325(1;1),
chr1	36748101	+	canonical	AACTC(A*)C	A	36748133	-32	expected	2	1	no	no	yes	0,0,(2)	0,0,(1)	0,0,(0)	0,0,(0)	SRR545717(2;1),
chr1	37948312	+	canonical	TGCTT(A*)G	A	37948337	-25	expected	6	2	yes	no	yes	0,0,(6)	0,0,(2)	0,0,(6)	0,0,(2)	SRR317062(6;2),
chr1	38171092	+	canonical	TCTTC(A*)C	A	38171112	-20	expected	5	1	yes	no	yes	0,0,(5)	0,0,(1)	0,0,(5)	0,0,(1)	SRR534318(5;1),
chr1	38489194	+	canonical	TACTG(A*)T	A	38489216	-22	expected	1	1	no	no	yes	1,0,(0)	1,0,(0)	0,0,(0)	0,0,(0)	SRR545708(1;1),
chr1	39494371	+	canonical	TACTT(A*)T	A	39494394	-23	expected	1	1	yes	no	yes	0,0,(1)	0,0,(1)	0,0,(1)	0,0,(1)	SRR317042(1;1),
chr1	39749705	+	canonical	TGCTA(A*)T	A	39749737	-32	expected	7	3	yes	yes	yes	0,0,(7)	0,0,(3)	0,0,(7)	0,0,(3)	SRR317047(1;1),SRR317035(1;1),SRR545712(5;1),
chr1	39815129	+	canonical	TCTTG(A*)C	A	39815149	-20	expected	11	1	no	no	yes	11,0,(0)	1,0,(0)	0,0,(0)	0,0,(0)	SRR545711(11;1),
chr1	39824801	+	canonical	TTTTC(A*)T	A	39824812	-11	expected	5	2	yes	no	yes	0,0,(5)	0,0,(2)	0,0,(5)	0,0,(2)	SRR534318(5;2),
chr1	39893567	+	canonical	TATTC(A*)T	A	39893632	-65	distal	2	2	yes	yes	yes	1,0,(1)	1,0,(1)	0,0,(1)	0,0,(1)	SRR545704(1;1),SRR545702(1;1),
chr1	39893581	+	canonical	TGTTT(A*)C	A	39893632	-51	expected	7	5	yes	yes	yes	0,5,(2)	0,3,(2)	0,0,(2)	0,0,(2)	SRR545707(2;1),SRR534325(1;1),SRR545709(2;1),SRR545704(1;1),SRR545692(1;1),
chr1	39893588	+	canonical	TTTTC(A*)T	A	39893632	-44	expected	1	1	yes	no	yes	0,0,(1)	0,0,(1)	0,0,(1)	0,0,(1)	SRR534334(1;1),
chr1	39893610	+	canonical	TATTC(A*)T	A	39893632	-22	expected	9	6	yes	yes	yes	0,0,(9)	0,0,(6)	0,0,(9)	0,0,(6)	SRR545694(2;1),SRR545718(2;2),SRR534318(4;2),SRR317069(1;1),
chr1	39902154	+	canonical	TACAG(A*)T	A	39903448	-1294	distal	2	1	no	no	yes	0,0,(2)	0,0,(1)	0,0,(0)	0,0,(0)	SRR545692(2;1),
chr1	39904921	+	canonical	TATTC(A*)T	A	39904945	-24	expected	23	8	yes	yes	yes	0,0,(23)	0,0,(8)	0,0,(21)	0,0,(7)	SRR545707(1;1),SRR534318(3;1),SRR545702(5;1),SRR545718(4;1),SRR545713(4;2),SRR545703(5;1),SRR317039(1;1),
chr1	39906652	+	canonical	GGCTT(A*)T	A	39906674	-22	expected	2	2	yes	yes	yes	0,1,(1)	0,1,(1)	0,0,(1)	0,0,(1)	SRR545718(1;1),SRR317042(1;1),
chr1	39909089	+	canonical	TACTG(A*)C	A	39909117	-28	expected	1	1	no	no	yes	1,0,(0)	1,0,(0)	0,0,(0)	0,0,(0)	SRR545694(1;1),
chr1	41228530	+	canonical	AACTC(A*)C	A	41228559	-29	expected	9	6	yes	yes	yes	5,0,(4)	2,0,(4)	0,0,(3)	0,0,(3)	SRR307930(1;1),SRR317066(4;1),SRR545706(1;1),SRR317043(1;1),SRR545687(1;1),SRR545709(1;1),
chr1	42925248	+	canonical	TGCTT(A*)T	A	42925273	-25	expected	5	3	yes	yes	yes	0,2,(3)	0,1,(2)	0,0,(3)	0,0,(2)	SRR317054(2;1),SRR317055(3;2),
chr1	43162274	+	canonical	TTCTG(A*)T	A	43162312	-38	expected	3	1	yes	no	yes	0,0,(3)	0,0,(1)	0,0,(3)	0,0,(1)	SRR545713(3;1),
chr1	43777955	+	canonical	TTCTG(A*)C	A	43777975	-20	expected	1	1	yes	no	yes	0,0,(1)	0,0,(1)	0,0,(1)	0,0,(1)	SRR317068(1;1),
chr1	44072456	+	canonical	AGCTC(A*)C	A	44072484	-28	expected	2	2	yes	yes	yes	0,1,(1)	0,1,(1)	0,0,(1)	0,0,(1)	SRR317064(1;1),SRR315318(1;1),
chr1	44075029	+	canonical	TTCTC(A*)C	A	44075053	-24	expected	6	1	yes	no	yes	0,0,(6)	0,0,(1)	0,0,(6)	0,0,(1)	SRR534318(6;1),
chr1	45268921	+	canonical	TGTTC(A*)C	A	45268939	-18	expected	1	1	no	no	yes	0,0,(1)	0,0,(1)	0,0,(0)	0,0,(0)	SRR534317(1;1),
chr1	46491326	+	canonical	TCCTC(A*)T	A	46491348	-22	expected	1	1	yes	no	yes	0,0,(1)	0,0,(1)	0,0,(1)	0,0,(1)	SRR545704(1;1),
chr1	52248198	+	canonical	TTCTC(A*)T	A	52248230	-32	expected	1	1	yes	no	yes	0,0,(1)	0,0,(1)	0,0,(1)	0,0,(1)	SRR315311(1;1),
chr1	55193996	+	canonical	AGCTG(A*)T	A	55194018	-22	expected	1	1	no	no	yes	1,0,(0)	1,0,(0)	0,0,(0)	0,0,(0)	SRR307930(1;1),
chr1	55518297	+	canonical	TTCTC(A*)T	A	55518322	-25	expected	1	1	yes	no	yes	0,0,(1)	0,0,(1)	0,0,(1)	0,0,(1)	SRR317050(1;1),
chr1	62340887	+	canonical	TACTA(A*)T	A	62340914	-27	expected	1	1	no	no	yes	1,0,(0)	1,0,(0)	0,0,(0)	0,0,(0)	SRR317050(1;1),
chr1	62907133	+	canonical	TACTT(A*)T	A	62907158	-25	expected	1	1	no	no	yes	0,1,(0)	0,1,(0)	0,0,(0)	0,0,(0)	SRR317054(1;1),
chr1	64036672	+	canonical	AGCTT(A*)T	A	64036691	-19	expected	3	1	yes	no	yes	0,0,(3)	0,0,(1)	0,0,(3)	0,0,(1)	SRR545703(3;1),
chr1	64095527	+	canonical	TGCTA(G*)T	G	64095612	-85	distal	2	1	no	no	yes	0,2,(0)	0,1,(0)	0,0,(0)	0,0,(0)	SRR545709(2;1),
chr1	70697929	+	canonical	TTCTA(A*)T	A	70697950	-21	expected	3	3	yes	yes	yes	1,0,(2)	1,0,(2)	0,0,(2)	0,0,(2)	SRR545713(1;1),SRR545702(1;1),SRR545715(1;1),
chr1	87797638	+	canonical	TACTA(A*)C	A	87797695	-57	expected	1	1	yes	no	yes	0,0,(1)	0,0,(1)	0,0,(1)	0,0,(1)	SRR534334(1;1),
chr1	91979477	+	canonical	TCCTT(A*)T	A	91979504	-27	expected	2	2	yes	yes	yes	0,0,(2)	0,0,(2)	0,0,(2)	0,0,(2)	SRR315309(1;1),SRR545717(1;1),
chr1	93705214	+	canonical	TAGTT(A*)T	A	93705239	-25	expected	1	1	no	no	yes	0,0,(1)	0,0,(1)	0,0,(0)	0,0,(0)	SRR545686(1;1),
chr1	104114710	+	canonical	TAGTT(A*)T	A	104114731	-21	expected	1	1	no	no	yes	0,0,(1)	0,0,(1)	0,0,(0)	0,0,(0)	SRR545723(1;1),
chr1	109295654	+	canonical	TGCTT(A*)C	A	109295684	-30	expected	1	1	yes	no	yes	0,0,(1)	0,0,(1)	0,0,(1)	0,0,(1)	SRR534331(1;1),
chr1	109321882	+	canonical	TGCTT(A*)A	A	109321907	-25	expected	1	1	no	no	yes	0,0,(1)	0,0,(1)	0,0,(0)	0,0,(0)	SRR534318(1;1),
chr1	109778556	+	canonical	TATTC(A*)C	A	109778598	-42	expected	6	2	yes	yes	yes	0,0,(6)	0,0,(2)	0,0,(5)	0,0,(1)	SRR545711(5;1),SRR545717(1;1),
chr1	109810453	+	canonical	TGCTC(C*)T	C	109810472	-19	expected	1	1	no	no	yes	0,1,(0)	0,1,(0)	0,0,(0)	0,0,(0)	SRR317050(1;1),
chr1	109816726	+	canonical	CACTC(A*)T	A	110009680	-192954	distal	3	2	yes	yes	yes	0,0,(3)	0,0,(2)	0,0,(3)	0,0,(2)	SRR317057(1;1),SRR545686(2;1),
chr1	110558021	+	canonical	TGCCC(A*)T	A	110558046	-25	expected	2	1	yes	no	yes	0,0,(2)	0,0,(1)	0,0,(2)	0,0,(1)	SRR545719(2;1),
chr1	110560543	+	canonical	TACTC(A*)T	A	110560567	-24	expected	2	2	yes	yes	yes	0,1,(1)	0,1,(1)	0,1,(0)	0,1,(0)	SRR317043(1;1),SRR545720(1;1),
chr1	110585670	+	canonical	TGTGG(A*)C	A	110585709	-39	expected	3	1	yes	no	yes	0,0,(3)	0,0,(1)	0,0,(3)	0,0,(1)	SRR545685(3;1),
chr1	113197063	+	canonical	TACTC(A*)T	A	113197086	-23	expected	1	1	no	no	yes	0,0,(1)	0,0,(1)	0,0,(0)	0,0,(0)	SRR545707(1;1),
chr1	113235359	+	canonical	CACTC(A*)C	A	113235382	-23	expected	3	1	no	no	yes	0,0,(3)	0,0,(1)	0,0,(0)	0,0,(0)	SRR545719(3;1),
chr1	113238742	+	canonical	AGCTG(A*)T	A	113238769	-27	expected	1	1	no	no	yes	1,0,(0)	1,0,(0)	0,0,(0)	0,0,(0)	SRR315310(1;1),
chr1	114500667	+	canonical	TACAA(A*)T	A	114500687	-20	expected	2	1	yes	no	yes	0,2,(0)	0,1,(0)	0,2,(0)	0,1,(0)	SRR545701(2;1),
chr1	114515624	+	canonical	TCCTC(A*)C	A	114515645	-21	expected	1	1	yes	no	yes	0,0,(1)	0,0,(1)	0,0,(1)	0,0,(1)	SRR545690(1;1),
chr1	116932815	+	canonical	TAATA(A*)T	A	116932834	-19	expected	5	2	yes	yes	yes	2,3,(0)	1,1,(0)	2,0,(0)	1,0,(0)	SRR545704(2;1),SRR545692(3;1),
chr1	117633919	+	canonical	TATAC(A*)T	A	117633949	-30	expected	1	1	yes	no	yes	0,0,(1)	0,0,(1)	0,0,(1)	0,0,(1)	SRR315305(1;1),
chr1	117635331	+	canonical	TGCTC(C*)T	C	117635352	-21	expected	6	1	no	no	yes	0,0,(6)	0,0,(1)	0,0,(0)	0,0,(0)	SRR545685(6;1),
chr1	118492584	+	canonical	TACTC(A*)T	A	118492617	-33	expected	1	1	yes	no	yes	0,0,(1)	0,0,(1)	0,0,(1)	0,0,(1)	SRR317043(1;1),
chr1	120282979	+	canonical	TCCTG(A*)C	A	120283008	-29	expected	1	1	no	no	yes	1,0,(0)	1,0,(0)	0,0,(0)	0,0,(0)	SRR317049(1;1),
chr1	145440878	+	canonical	TTCTT(A*)T	A	145440901	-23	expected	1	1	yes	no	yes	0,0,(1)	0,0,(1)	0,0,(1)	0,0,(1)	SRR317042(1;1),
chr1	145508891	+	canonical	TTTTC(A*)T	A	145508915	-24	expected	2	1	yes	no	yes	0,0,(2)	0,0,(1)	0,0,(2)	0,0,(1)	SRR317039(2;1),
chr1	145578921	+	canonical	TGCTG(A*)C	A	145578949	-28	expected	1	1	no	no	yes	1,0,(0)	1,0,(0)	0,0,(0)	0,0,(0)	SRR317042(1;1),
chr1	145650466	+	canonical	CACTC(A*)T	A	145650482	-16	expected	6	4	yes	yes	yes	0,0,(6)	0,0,(4)	0,0,(4)	0,0,(3)	SRR545714(2;1),SRR534335(2;1),SRR317054(1;1),SRR317049(1;1),
chr1	146727444	+	canonical	TGTTT(A*)T	A	146727467	-23	expected	2	2	yes	yes	yes	1,0,(1)	1,0,(1)	0,0,(1)	0,0,(1)	SRR545687(1;1),SRR317054(1;1),
chr1	150298170	+	canonical	TACTC(T*)T	T	150298208	-38	expected	1	1	no	no	yes	0,0,(1)	0,0,(1)	0,0,(0)	0,0,(0)	SRR317051(1;1),
chr1	150461417	+	canonical	TCTTC(A*)T	A	150461439	-22	expected	1	1	no	no	yes	0,1,(0)	0,1,(0)	0,0,(0)	0,0,(0)	SRR534334(1;1),
chr1	150529394	+	canonical	TATTC(A*)T	A	150529414	-20	expected	5	2	yes	yes	yes	0,0,(5)	0,0,(2)	0,0,(4)	0,0,(1)	SRR534335(1;1),SRR534334(4;1),
chr1	151214882	+	canonical	TATTT(A*)C	A	151214913	-31	expected	1	1	yes	no	yes	0,0,(1)	0,0,(1)	0,0,(1)	0,0,(1)	SRR317058(1;1),
chr1	151547357	+	canonical	TTCTC(A*)T	A	151547386	-29	expected	7	2	yes	yes	yes	0,0,(7)	0,0,(2)	0,0,(7)	0,0,(2)	SRR545715(5;1),SRR317063(2;1),
chr1	153733276	+	canonical	TGCTC(A*)T	A	153733302	-26	expected	2	1	no	no	yes	0,2,(0)	0,1,(0)	0,0,(0)	0,0,(0)	SRR545690(2;1),
chr1	153742213	+	canonical	AGCTG(A*)T	A	153742244	-31	expected	1	1	no	no	yes	1,0,(0)	1,0,(0)	0,0,(0)	0,0,(0)	SRR317039(1;1),
chr1	154218653	+	canonical	TCTTC(A*)T	A	154218679	-26	expected	5	1	yes	no	yes	0,0,(5)	0,0,(1)	0,0,(5)	0,0,(1)	SRR545714(5;1),
chr1	154228134	+	canonical	GGCTG(A*)T	A	154228158	-24	expected	17	7	yes	yes	yes	11,0,(6)	4,0,(3)	0,0,(6)	0,0,(3)	SRR545688(1;1),SRR545714(7;2),SRR534318(2;1),SRR317050(5;2),SRR317062(2;1),
chr1	154229496	+	canonical	TGCTG(A*)T	A	154229538	-42	expected	6	3	yes	yes	yes	4,2,(0)	2,1,(0)	0,2,(0)	0,1,(0)	SRR317036(1;1),SRR545708(2;1),SRR545720(3;1),
chr1	154241195	+	canonical	TGCTG(A*)T	A	154241232	-37	expected	2	1	no	no	yes	2,0,(0)	1,0,(0)	0,0,(0)	0,0,(0)	SRR545718(2;1),
chr1	154304412	+	canonical	TTCTC(A*)T	A	154304429	-17	expected	1	1	yes	no	yes	0,0,(1)	0,0,(1)	0,0,(1)	0,0,(1)	SRR315317(1;1),
chr1	154321285	+	canonical	CGCTG(A*)C	A	154321315	-30	expected	3	2	yes	yes	yes	1,0,(2)	1,0,(1)	1,0,(2)	1,0,(1)	SRR317064(1;1),SRR545692(2;1),
chr1	154422364	+	canonical	GGCTG(A*)T	A	154422386	-22	expected	2	1	no	no	yes	2,0,(0)	1,0,(0)	0,0,(0)	0,0,(0)	SRR545713(2;1),
chr1	155698812	+	canonical	TTTTT(A*)T	A	155698832	-20	expected	2	1	yes	no	yes	0,0,(2)	0,0,(1)	0,0,(2)	0,0,(1)	SRR534326(2;1),
chr1	155701117	+	canonical	TGATG(A*)T	A	155701146	-29	expected	2	1	no	no	yes	2,0,(0)	1,0,(0)	0,0,(0)	0,0,(0)	SRR545719(2;1),
chr1	156108842	+	canonical	TGCTC(A*)C	A	156108870	-28	expected	5	2	yes	yes	yes	0,2,(3)	0,1,(1)	0,0,(3)	0,0,(1)	SRR545694(3;1),SRR545717(2;1),
chr1	156563169	+	canonical	TGCTG(G*)C	G	156563199	-30	expected	1	1	yes	no	yes	0,0,(1)	0,0,(1)	0,0,(1)	0,0,(1)	SRR317054(1;1),
chr1	156876401	+	canonical	TGGTG(A*)C	A	156876428	-27	expected	2	1	yes	no	yes	0,0,(2)	0,0,(1)	0,0,(2)	0,0,(1)	SRR545718(2;1),
chr1	156878696	+	canonical	CGCTC(A*)C	A	156878707	-11	expected	1	1	no	no	yes	0,0,(1)	0,0,(1)	0,0,(0)	0,0,(0)	SRR545717(1;1),
chr1	160109660	+	canonical	TGCTG(A*)C	A	160109682	-22	expected	1	1	no	no	yes	1,0,(0)	1,0,(0)	0,0,(0)	0,0,(0)	SRR317040(1;1),
chr1	160167337	+	canonical	TAATG(A*)C	A	160167358	-21	expected	4	1	yes	no	yes	0,0,(4)	0,0,(1)	0,0,(4)	0,0,(1)	SRR545686(4;1),
chr1	161132688	+	canonical	TGCCC(A*)T	A	161132708	-20	expected	7	5	yes	yes	yes	0,0,(7)	0,0,(5)	0,0,(7)	0,0,(5)	SRR534334(1;1),SRR545717(2;1),SRR317050(1;1),SRR317064(2;1),SRR307931(1;1),
chr1	161139414	+	canonical	TTCTC(A*)T	A	161139449	-35	expected	11	1	yes	no	yes	0,0,(11)	0,0,(1)	0,0,(11)	0,0,(1)	SRR545711(11;1),
chr1	161198473	+	canonical	TACTG(A*)T	A	161198504	-31	expected	3	2	no	yes	yes	3,0,(0)	2,0,(0)	0,0,(0)	0,0,(0)	SRR317050(2;1),SRR317048(1;1),
chr1	161928209	+	canonical	TATTT(A*)T	A	161928235	-26	expected	4	2	yes	yes	yes	0,0,(4)	0,0,(2)	0,0,(4)	0,0,(2)	SRR545688(2;1),SRR534317(2;1),
chr1	162724922	+	canonical	TCTTC(A*)C	A	162724945	-23	expected	3	1	no	no	yes	0,0,(3)	0,0,(1)	0,0,(0)	0,0,(0)	SRR545694(3;1),
chr1	166818137	+	canonical	TACTT(A*)C	A	166818174	-37	expected	1	1	yes	no	yes	0,0,(1)	0,0,(1)	0,0,(1)	0,0,(1)	SRR307930(1;1),
chr1	170699389	+	canonical	GGCTT(A*)T	A	170699417	-28	expected	5	2	yes	yes	yes	0,0,(5)	0,0,(2)	0,0,(5)	0,0,(2)	SRR545720(1;1),SRR317064(4;1),
chr1	171506372	+	canonical	TCCTC(A*)T	A	171506401	-29	expected	5	3	yes	yes	yes	0,0,(5)	0,0,(3)	0,0,(5)	0,0,(3)	SRR545689(1;1),SRR545690(4;2),
chr1	171553532	+	canonical	TACTC(A*)T	A	171553557	-25	expected	16	9	yes	yes	yes	0,0,(16)	0,0,(9)	0,0,(14)	0,0,(7)	SRR317042(2;1),SRR545721(3;1),SRR545714(2;1),SRR317046(1;1),SRR545708(4;1),SRR317052(1;1),SRR317063(1;1),SRR317043(1;1),SRR317051(1;1),
chr1	172560099	+	canonical	AGCTG(A*)T	A	172560123	-24	expected	3	2	yes	yes	yes	2,0,(1)	1,0,(1)	0,0,(1)	0,0,(1)	SRR317036(1;1),SRR545692(2;1),
chr1	178852563	+	canonical	TGTTA(A*)T	A	178852600	-37	expected	3	1	yes	no	yes	0,0,(3)	0,0,(1)	0,0,(3)	0,0,(1)	SRR545709(3;1),
chr1	179322682	+	canonical	TGTAC(A*)C	A	179322719	-37	expected	1	1	yes	no	yes	0,0,(1)	0,0,(1)	0,0,(1)	0,0,(1)	SRR545702(1;1),
chr1	179873075	+	canonical	TATTT(A*)T	A	179873100	-25	expected	1	1	no	no	yes	1,0,(0)	1,0,(0)	0,0,(0)	0,0,(0)	SRR534317(1;1),
chr1	180023546	+	canonical	TATTT(G*)C	G	180023549	-3	proximal	2	2	no	no	yes	0,0,(2)	0,0,(2)	0,0,(0)	0,0,(0)	SRR534326(2;2),
chr1	180145046	+	canonical	CGCTC(A*)C	A	180145065	-19	expected	6	3	yes	yes	yes	0,0,(6)	0,0,(3)	0,0,(6)	0,0,(3)	SRR315318(1;1),SRR534334(4;1),SRR534318(1;1),
chr1	180159549	+	canonical	CACTC(A*)C	A	180159567	-18	expected	5	1	yes	no	yes	0,0,(5)	0,0,(1)	0,0,(5)	0,0,(1)	SRR545705(5;1),
chr1	182822437	+	canonical	TTTTA(A*)C	A	182822440	-3	proximal	2	1	no	no	yes	0,2,(0)	0,1,(0)	0,0,(0)	0,0,(0)	SRR545714(2;1),
chr1	182827664	+	canonical	TGTTA(A*)T	A	182827685	-21	expected	3	2	no	yes	yes	3,0,(0)	2,0,(0)	0,0,(0)	0,0,(0)	SRR317063(1;1),SRR545720(2;1),
chr1	182849610	+	canonical	TGCTC(A*)C	A	182849631	-21	expected	10	8	yes	yes	yes	3,0,(7)	3,0,(5)	0,0,(6)	0,0,(4)	SRR317042(3;3),SRR307931(1;1),SRR545717(1;1),SRR534326(3;1),SRR545692(1;1),SRR545694(1;1),
chr1	183510095	+	canonical	TTCTC(A*)T	A	183510118	-23	expected	1	1	yes	no	yes	0,0,(1)	0,0,(1)	0,0,(1)	0,0,(1)	SRR545708(1;1),
chr1	185891484	+	canonical	TGCTG(A*)C	A	185891510	-26	expected	1	1	no	no	yes	1,0,(0)	1,0,(0)	0,0,(0)	0,0,(0)	SRR545713(1;1),
chr1	186084354	+	canonical	TGCTG(A*)C	A	186084389	-35	expected	1	1	no	no	yes	1,0,(0)	1,0,(0)	0,0,(0)	0,0,(0)	SRR317068(1;1),
chr1	186114511	+	canonical	TTTTC(A*)T	A	186114534	-23	expected	1	1	yes	no	yes	0,0,(1)	0,0,(1)	0,0,(1)	0,0,(1)	SRR545706(1;1),
chr1	186388102	+	canonical	TGCTC(A*)T	A	186388140	-38	expected	3	1	no	no	yes	3,0,(0)	1,0,(0)	0,0,(0)	0,0,(0)	SRR545719(3;1),
chr1	198671497	+	canonical	TGCTG(A*)T	A	198671515	-18	expected	1	1	no	no	yes	0,0,(1)	0,0,(1)	0,0,(0)	0,0,(0)	SRR534311(1;1),
chr1	198719590	+	canonical	TAGTA(A*)C	A	198719620	-30	expected	4	1	no	no	yes	0,4,(0)	0,1,(0)	0,0,(0)	0,0,(0)	SRR545690(4;1),
chr1	200813876	+	canonical	TGCTA(A*)T	A	200813909	-33	expected	2	2	yes	yes	yes	0,0,(2)	0,0,(2)	0,0,(2)	0,0,(2)	SRR545720(1;1),SRR545691(1;1),
chr1	200823880	+	canonical	TGCTA(G*)T	G	200823944	-64	distal	1	1	yes	no	yes	0,1,(0)	0,1,(0)	0,1,(0)	0,1,(0)	SRR317047(1;1),
chr1	200876905	+	canonical	TACTC(A*)T	A	200876961	-56	expected	1	1	yes	no	yes	0,0,(1)	0,0,(1)	0,0,(1)	0,0,(1)	SRR307921(1;1),
chr1	201779627	+	canonical	TACTC(A*)T	A	201779650	-23	expected	4	4	yes	yes	yes	0,0,(4)	0,0,(4)	0,0,(4)	0,0,(4)	SRR307923(1;1),SRR545708(1;1),SRR534318(1;1),SRR545691(1;1),
chr1	201844251	+	canonical	TCCTG(A*)C	A	201844279	-28	expected	2	2	no	yes	yes	2,0,(0)	2,0,(0)	0,0,(0)	0,0,(0)	SRR317042(1;1),SRR317043(1;1),
chr1	203025227	+	canonical	AGCTT(A*)C	A	203025247	-20	expected	1	1	yes	no	yes	0,0,(1)	0,0,(1)	0,0,(1)	0,0,(1)	SRR307921(1;1),
chr1	203671129	+	canonical	TAGTT(A*)C	A	203671171	-42	expected	1	1	no	no	yes	0,0,(1)	0,0,(1)	0,0,(0)	0,0,(0)	SRR534334(1;1),
chr1	203672752	+	canonical	TGCTC(A*)C	A	203672779	-27	expected	1	1	yes	no	yes	0,0,(1)	0,0,(1)	0,0,(1)	0,0,(1)	SRR317043(1;1),
chr1	203682267	+	canonical	GACTG(A*)T	A	203682292	-25	expected	1	1	no	no	yes	1,0,(0)	1,0,(0)	0,0,(0)	0,0,(0)	SRR545717(1;1),
chr1	203799226	+	canonical	TCCTC(A*)T	A	203799250	-24	expected	1	1	no	no	yes	0,0,(1)	0,0,(1)	0,0,(0)	0,0,(0)	SRR534335(1;1),
chr1	205492594	+	canonical	AGCTG(A*)C	A	205492610	-16	expected	1	1	no	no	yes	1,0,(0)	1,0,(0)	0,0,(0)	0,0,(0)	SRR317039(1;1),
chr1	206902720	+	canonical	CACTC(A*)C	A	206902740	-20	expected	4	2	yes	yes	yes	0,0,(4)	0,0,(2)	0,0,(3)	0,0,(1)	SRR317043(1;1),SRR545707(3;1),
chr1	210008398	+	canonical	TGCTG(A*)C	A	210008419	-21	expected	5	2	yes	yes	yes	0,5,(0)	0,2,(0)	0,3,(0)	0,1,(0)	SRR545706(2;1),SRR545719(3;1),
chr1	214803853	+	canonical	GGCTG(A*)T	A	214803876	-23	expected	2	1	no	no	yes	2,0,(0)	1,0,(0)	0,0,(0)	0,0,(0)	SRR545720(2;1),
chr1	214830250	+	canonical	TGCAC(A*)T	A	214830275	-25	expected	1	1	yes	no	yes	1,0,(0)	1,0,(0)	1,0,(0)	1,0,(0)	SRR534289(1;1),
chr1	214832170	+	canonical	TGCTG(A*)C	A	214832192	-22	expected	1	1	yes	no	yes	0,0,(1)	0,0,(1)	0,0,(1)	0,0,(1)	SRR534334(1;1),
chr1	215751257	+	canonical	TCCTT(A*)T	A	215751271	-14	expected	1	1	no	no	yes	1,0,(0)	1,0,(0)	0,0,(0)	0,0,(0)	SRR317043(1;1),
chr1	220311236	+	canonical	TGTTT(A*)T	A	220311259	-23	expected	1	1	yes	no	yes	0,0,(1)	0,0,(1)	0,0,(1)	0,0,(1)	SRR545707(1;1),
chr1	223958127	+	canonical	TTCTT(A*)C	A	223958148	-21	expected	1	1	yes	no	yes	0,0,(1)	0,0,(1)	0,0,(1)	0,0,(1)	SRR545694(1;1),
chr1	224563474	+	canonical	TAGTG(A*)C	A	224563496	-22	expected	1	1	yes	no	yes	0,1,(0)	0,1,(0)	0,1,(0)	0,1,(0)	SRR317050(1;1),
chr1	228474451	+	canonical	TGCTC(C*)T	C	228474473	-22	expected	12	7	yes	yes	yes	0,0,(12)	0,0,(7)	0,0,(3)	0,0,(2)	SRR317051(4;2),SRR317049(5;3),SRR317039(3;2),
chr1	228481032	+	canonical	TGTTC(A*)T	A	228481053	-21	expected	1	1	yes	no	yes	0,0,(1)	0,0,(1)	0,0,(1)	0,0,(1)	SRR307914(1;1),
chr1	228521260	+	canonical	GGCTG(A*)C	A	228521283	-23	expected	1	1	no	no	yes	1,0,(0)	1,0,(0)	0,0,(0)	0,0,(0)	SRR545723(1;1),
chr1	231664964	+	canonical	TGGTG(A*)T	A	231665000	-36	expected	1	1	no	no	yes	0,1,(0)	0,1,(0)	0,0,(0)	0,0,(0)	SRR315311(1;1),
chr1	234509950	+	canonical	TGTTA(A*)T	A	234509975	-25	expected	2	1	yes	no	yes	0,0,(2)	0,0,(1)	0,0,(2)	0,0,(1)	SRR534335(2;1),
chr1	236998874	+	canonical	TGCAG(G*)T	G	237001713	-2839	distal	2	1	no	no	yes	0,2,(0)	0,1,(0)	0,0,(0)	0,0,(0)	SRR545687(2;1),
chr1	244855144	+	canonical	TCCTT(A*)T	A	244855180	-36	expected	1	1	no	no	yes	0,1,(0)	0,1,(0)	0,0,(0)	0,0,(0)	SRR317043(1;1),
chr10	409273	-	canonical	TGCTC(A*)C	A	409251	-22	expected	2	2	yes	yes	yes	0,0,(2)	0,0,(2)	0,0,(2)	0,0,(2)	SRR545718(1;1),SRR317055(1;1),
chr10	5808284	-	canonical	AGCTC(A*)C	A	5808258	-26	expected	6	4	yes	yes	yes	0,0,(6)	0,0,(4)	0,0,(4)	0,0,(3)	SRR315318(1;1),SRR534289(2;1),SRR317064(3;2),
chr10	7409880	-	canonical	TAGTA(A*)T	A	7409851	-29	expected	1	1	no	no	yes	0,1,(0)	0,1,(0)	0,0,(0)	0,0,(0)	SRR317059(1;1),
chr10	7817791	-	canonical	TGTAC(A*)C	A	7817762	-29	expected	1	1	yes	no	yes	0,0,(1)	0,0,(1)	0,0,(1)	0,0,(1)	SRR307921(1;1),
chr10	11978750	-	canonical	TATAT(A*)T	A	11978711	-39	expected	1	1	yes	no	yes	0,0,(1)	0,0,(1)	0,0,(1)	0,0,(1)	SRR307924(1;1),
chr10	12046751	-	canonical	TGTTA(A*)T	A	12046726	-25	expected	2	1	yes	no	yes	0,0,(2)	0,0,(1)	0,0,(2)	0,0,(1)	SRR545702(2;1),
chr10	12077459	-	canonical	TACTG(A*)C	A	12077440	-19	expected	1	1	no	no	yes	1,0,(0)	1,0,(0)	0,0,(0)	0,0,(0)	SRR315305(1;1),
chr10	13705535	-	canonical	AACTC(A*)T	A	13705509	-26	expected	1	1	yes	no	yes	0,0,(1)	0,0,(1)	0,0,(1)	0,0,(1)	SRR545707(1;1),
chr10	13779954	-	canonical	TATTC(A*)C	A	13779930	-24	expected	1	1	yes	no	yes	0,0,(1)	0,0,(1)	0,0,(1)	0,0,(1)	SRR545720(1;1),
chr10	15183069	-	canonical	TATTC(A*)C	A	15183028	-41	expected	1	1	no	no	yes	0,1,(0)	0,1,(0)	0,0,(0)	0,0,(0)	SRR315306(1;1),
chr10	16824113	-	canonical	TACTG(A*)C	A	16824083	-30	expected	1	1	no	no	yes	1,0,(0)	1,0,(0)	0,0,(0)	0,0,(0)	SRR317043(1;1),
chr10	17171275	-	canonical	TACTG(A*)T	A	17171249	-26	expected	1	1	yes	no	yes	0,0,(1)	0,0,(1)	0,0,(1)	0,0,(1)	SRR545692(1;1),
chr10	22045707	-	canonical	TTCTC(A*)C	A	22045684	-23	expected	18	5	yes	yes	yes	1,0,(17)	1,0,(4)	0,0,(14)	0,0,(3)	SRR317057(11;1),SRR317049(3;1),SRR317067(1;1),SRR534334(2;1),SRR317042(1;1),
chr10	22856845	-	canonical	TGCGC(A*)T	A	22856818	-27	expected	5	4	yes	yes	yes	0,0,(5)	0,0,(4)	0,0,(5)	0,0,(4)	SRR534332(1;1),SRR317042(1;1),SRR534333(2;1),SRR534331(1;1),
chr10	24885855	-	canonical	CACTC(A*)T	A	24885811	-44	expected	14	5	yes	yes	yes	0,0,(14)	0,0,(5)	0,0,(14)	0,0,(5)	SRR545720(3;2),SRR315309(1;1),SRR545686(8;1),SRR545704(2;1),
chr10	27044727	-	canonical	TGTTT(G*)T	G	27044670	-57	expected	2	1	no	no	yes	0,0,(2)	0,0,(1)	0,0,(0)	0,0,(0)	SRR545714(2;1),
chr10	27401071	-	canonical	TGCTT(A*)C	A	27401049	-22	expected	2	1	yes	no	yes	0,0,(2)	0,0,(1)	0,0,(2)	0,0,(1)	SRR545714(2;1),
chr10	27410406	-	canonical	TGTTA(G*)T	G	27410377	-29	expected	1	1	no	no	yes	0,1,(0)	0,1,(0)	0,0,(0)	0,0,(0)	SRR545717(1;1),
chr10	27423930	-	canonical	TACTG(A*)T	A	27423910	-20	expected	10	4	yes	yes	yes	4,0,(6)	2,0,(2)	0,0,(6)	0,0,(2)	SRR317047(1;1),SRR317068(1;1),SRR545693(5;1),SRR545715(3;1),
chr10	31139328	-	canonical	TACAT(A*)C	A	31139296	-32	expected	1	1	no	no	yes	1,0,(0)	1,0,(0)	0,0,(0)	0,0,(0)	SRR545714(1;1),
chr10	32561123	-	canonical	TACTG(A*)T	A	32561095	-28	expected	9	3	yes	yes	yes	8,0,(1)	2,0,(1)	0,0,(1)	0,0,(1)	SRR534326(3;1),SRR545685(5;1),SRR317043(1;1),
chr10	33197484	-	canonical	TGCTC(A*)T	A	33197462	-22	expected	12	6	yes	yes	yes	0,0,(12)	0,0,(6)	0,0,(3)	0,0,(3)	SRR545690(1;1),SRR545707(3;1),SRR317050(1;1),SRR317063(1;1),SRR534334(2;1),SRR545720(4;1),
chr10	33469320	-	canonical	TGCTC(A*)C	A	33469293	-27	expected	1	1	yes	no	yes	0,0,(1)	0,0,(1)	0,0,(1)	0,0,(1)	SRR317045(1;1),
chr10	43046084	-	canonical	TTCTC(A*)T	A	43046063	-21	expected	1	1	yes	no	yes	0,0,(1)	0,0,(1)	0,0,(1)	0,0,(1)	SRR307922(1;1),
chr10	50682308	-	canonical	TGTAC(A*)T	A	50682288	-20	expected	1	1	yes	no	yes	0,0,(1)	0,0,(1)	0,0,(1)	0,0,(1)	SRR317042(1;1),
chr10	51040983	-	canonical	CACTC(A*)C	A	51040954	-29	expected	3	1	yes	no	yes	0,0,(3)	0,0,(1)	0,0,(3)	0,0,(1)	SRR545704(3;1),
chr10	51050133	-	canonical	TCCTT(A*)T	A	51050104	-29	expected	2	2	yes	no	yes	0,0,(2)	0,0,(2)	0,0,(2)	0,0,(2)	SRR317042(2;2),
chr10	58117965	-	canonical	AGCTA(A*)C	A	58117946	-19	expected	1	1	no	no	yes	0,1,(0)	0,1,(0)	0,0,(0)	0,0,(0)	SRR317042(1;1),
chr10	58118244	-	canonical	TACCC(A*)C	A	58118220	-24	expected	1	1	yes	no	yes	0,0,(1)	0,0,(1)	0,0,(1)	0,0,(1)	SRR315306(1;1),
chr10	64945432	-	canonical	TAGTA(A*)T	A	64945413	-19	expected	2	1	no	no	yes	0,2,(0)	0,1,(0)	0,0,(0)	0,0,(0)	SRR534333(2;1),
chr10	69716755	-	canonical	TACTA(A*)T	A	69716733	-22	expected	11	1	yes	no	yes	0,0,(11)	0,0,(1)	0,0,(11)	0,0,(1)	SRR545712(11;1),
chr10	71920859	-	canonical	AGTTG(A*)C	A	71920825	-34	expected	5	1	yes	no	yes	0,0,(5)	0,0,(1)	0,0,(5)	0,0,(1)	SRR545703(5;1),
chr10	73579680	-	canonical	TTCTC(A*)C	A	73579657	-23	expected	1	1	yes	no	yes	0,0,(1)	0,0,(1)	0,0,(1)	0,0,(1)	SRR534332(1;1),
chr10	73591027	-	canonical	TTCTG(A*)C	A	73591008	-19	expected	16	4	yes	yes	yes	1,3,(12)	1,1,(2)	0,3,(12)	0,1,(2)	SRR545714(12;2),SRR534318(3;1),SRR317055(1;1),
chr10	73594280	-	canonical	TCCTC(A*)C	A	73594262	-18	expected	1	1	yes	no	yes	0,0,(1)	0,0,(1)	0,0,(1)	0,0,(1)	SRR317039(1;1),
chr10	74803278	-	canonical	TGCAG(G*)T	G	74790128	-13150	distal	1	1	no	no	yes	0,1,(0)	0,1,(0)	0,0,(0)	0,0,(0)	SRR545688(1;1),
chr10	75011799	-	canonical	TCCTA(A*)C	A	75011795	-4	proximal	1	1	yes	no	yes	0,0,(1)	0,0,(1)	0,0,(1)	0,0,(1)	SRR307914(1;1),
chr10	75157049	-	canonical	TATTG(A*)C	A	75157032	-17	expected	1	1	yes	no	yes	0,0,(1)	0,0,(1)	0,0,(1)	0,0,(1)	SRR545717(1;1),
chr10	78844516	-	canonical	TATTT(A*)T	A	78844477	-39	expected	6	1	yes	no	yes	0,0,(6)	0,0,(1)	0,0,(6)	0,0,(1)	SRR545719(6;1),
chr10	79567726	-	canonical	TTCTG(A*)T	A	79567702	-24	expected	2	2	yes	yes	yes	0,0,(2)	0,0,(2)	0,0,(2)	0,0,(2)	SRR307931(1;1),SRR317050(1;1),
chr10	79579239	-	canonical	TTCTC(A*)C	A	79579223	-16	expected	2	2	yes	yes	yes	0,0,(2)	0,0,(2)	0,0,(2)	0,0,(2)	SRR545720(1;1),SRR317042(1;1),
chr10	79614153	-	canonical	TGTTC(A*)T	A	79614128	-25	expected	2	1	yes	no	yes	0,0,(2)	0,0,(1)	0,0,(2)	0,0,(1)	SRR317049(2;1),
chr10	79742101	-	canonical	TCCTC(A*)C	A	79742076	-25	expected	1	1	yes	no	yes	0,0,(1)	0,0,(1)	0,0,(1)	0,0,(1)	SRR317051(1;1),
chr10	81917802	-	canonical	TGGTT(A*)T	A	81917781	-21	expected	1	1	yes	no	yes	0,0,(1)	0,0,(1)	0,0,(1)	0,0,(1)	SRR307931(1;1),
chr10	88197799	-	canonical	AGCTG(A*)C	A	88197772	-27	expected	1	1	no	no	yes	1,0,(0)	1,0,(0)	0,0,(0)	0,0,(0)	SRR315312(1;1),
chr10	92679057	-	canonical	AACTC(A*)C	A	92679025	-32	expected	2	1	no	no	yes	0,0,(2)	0,0,(1)	0,0,(0)	0,0,(0)	SRR545707(2;1),
chr10	95066782	-	canonical	TTTTT(A*)C	A	95066758	-24	expected	9	3	no	yes	yes	9,0,(0)	3,0,(0)	0,0,(0)	0,0,(0)	SRR545704(3;1),SRR545719(3;1),SRR545718(3;1),
chr10	97388267	-	canonical	TACTG(A*)C	A	97388249	-18	expected	2	2	yes	yes	yes	1,0,(1)	1,0,(1)	0,0,(1)	0,0,(1)	SRR317051(1;1),SRR545717(1;1),
chr10	98989045	-	canonical	TGTTA(G*)T	G	98988982	-63	distal	3	3	no	yes	yes	0,3,(0)	0,3,(0)	0,0,(0)	0,0,(0)	SRR317042(1;1),SRR534289(1;1),SRR317055(1;1),
chr10	99132975	-	canonical	TGCAA(A*)C	A	99132957	-18	expected	2	1	yes	no	yes	2,0,(0)	1,0,(0)	2,0,(0)	1,0,(0)	SRR545712(2;1),
chr10	99133677	-	canonical	GGCTC(A*)C	A	99133651	-26	expected	2	1	yes	no	yes	0,0,(2)	0,0,(1)	0,0,(2)	0,0,(1)	SRR317049(2;1),
chr10	99229501	-	canonical	AACTG(A*)T	A	99229480	-21	expected	3	2	yes	yes	yes	0,0,(3)	0,0,(2)	0,0,(3)	0,0,(2)	SRR317045(1;1),SRR545714(2;1),
chr10	100190454	-	canonical	TGCTG(A*)T	A	100190427	-27	expected	5	2	yes	yes	yes	3,0,(2)	1,0,(1)	0,0,(2)	0,0,(1)	SRR307924(2;1),SRR545717(3;1),
chr10	101654831	-	canonical	TGCTA(A*)C	A	101654807	-24	expected	3	1	yes	no	yes	0,0,(3)	0,0,(1)	0,0,(3)	0,0,(1)	SRR545707(3;1),
chr10	101667872	-	canonical	TTTTT(A*)T	A	101667851	-21	expected	2	1	yes	no	yes	0,0,(2)	0,0,(1)	0,0,(2)	0,0,(1)	SRR545709(2;1),
chr10	101667888	-	canonical	AGCTC(A*)T	A	101667851	-37	expected	5	2	no	yes	yes	4,0,(1)	1,0,(1)	0,0,(0)	0,0,(0)	SRR534327(1;1),SRR545694(4;1),
chr10	103342677	-	canonical	TCCTT(A*)C	A	103342648	-29	expected	4	4	yes	yes	yes	0,1,(3)	0,1,(3)	0,0,(2)	0,0,(2)	SRR317044(1;1),SRR307930(1;1),SRR317062(1;1),SRR317049(1;1),
chr10	103541645	-	canonical	TCTTA(A*)C	A	103541611	-34	expected	2	1	yes	no	yes	0,0,(2)	0,0,(1)	0,0,(2)	0,0,(1)	SRR545693(2;1),
chr10	103559233	-	canonical	TATTT(A*)T	A	103559212	-21	expected	1	1	yes	no	yes	0,0,(1)	0,0,(1)	0,0,(1)	0,0,(1)	SRR317042(1;1),
chr10	103716506	-	canonical	TGCCT(A*)T	A	103716480	-26	expected	2	1	yes	no	yes	0,0,(2)	0,0,(1)	0,0,(2)	0,0,(1)	SRR317063(2;1),
chr10	103785022	-	canonical	TGCTT(A*)T	A	103785005	-17	expected	1	1	yes	no	yes	0,0,(1)	0,0,(1)	0,0,(1)	0,0,(1)	SRR545688(1;1),
chr10	105363572	-	canonical	AACTC(A*)C	A	105363546	-26	expected	2	1	yes	no	yes	0,2,(0)	0,1,(0)	0,2,(0)	0,1,(0)	SRR315318(2;1),
chr10	105801319	-	canonical	TGCTC(A*)T	A	105801296	-23	expected	1	1	yes	no	yes	0,0,(1)	0,0,(1)	0,0,(1)	0,0,(1)	SRR317047(1;1),
chr10	111629811	-	canonical	TTCTC(A*)T	A	111629787	-24	expected	1	1	yes	no	yes	0,0,(1)	0,0,(1)	0,0,(1)	0,0,(1)	SRR317042(1;1),
chr10	111640025	-	canonical	TGATA(A*)C	A	111639996	-29	expected	1	1	yes	no	yes	0,0,(1)	0,0,(1)	0,0,(1)	0,0,(1)	SRR315310(1;1),
chr10	113932859	-	canonical	TGTTC(A*)T	A	113932824	-35	expected	2	1	yes	no	yes	0,0,(2)	0,0,(1)	0,0,(2)	0,0,(1)	SRR317044(2;1),
chr10	113941596	-	canonical	TGTTA(A*)T	A	113941571	-25	expected	1	1	yes	no	yes	0,1,(0)	0,1,(0)	0,1,(0)	0,1,(0)	SRR317054(1;1),
chr10	127526992	-	canonical	TATTA(A*)T	A	127526956	-36	expected	7	2	yes	yes	yes	0,0,(7)	0,0,(2)	0,0,(7)	0,0,(2)	SRR545705(6;1),SRR545691(1;1),
chr10	127529590	-	canonical	TGCTA(A*)C	A	127529565	-25	expected	1	1	yes	no	yes	0,0,(1)	0,0,(1)	0,0,(1)	0,0,(1)	SRR545718(1;1),
chr10	133786662	-	canonical	TGTTC(A*)C	A	133786622	-40	expected	1	1	yes	no	yes	0,0,(1)	0,0,(1)	0,0,(1)	0,0,(1)	SRR317042(1;1),
chr10	135095879	-	canonical	AACTA(A*)C	A	135095846	-33	expected	2	1	yes	no	yes	0,2,(0)	0,1,(0)	0,2,(0)	0,1,(0)	SRR545702(2;1),
chr10	3155564	+	canonical	TGCAG(A*)C	A	3158967	-3403	distal	1	1	no	no	yes	1,0,(0)	1,0,(0)	0,0,(0)	0,0,(0)	SRR317042(1;1),
chr10	3177905	+	canonical	TATTA(A*)T	A	3177927	-22	expected	4	2	yes	yes	yes	0,0,(4)	0,0,(2)	0,0,(4)	0,0,(2)	SRR545719(2;1),SRR545707(2;1),
chr10	6259074	+	canonical	TTCTA(A*)C	A	6259097	-23	expected	4	2	yes	yes	yes	0,3,(1)	0,1,(1)	0,0,(1)	0,0,(1)	SRR317062(3;1),SRR317063(1;1),
chr10	6264792	+	canonical	AGCTC(A*)C	A	6264817	-25	expected	2	2	yes	yes	yes	0,0,(2)	0,0,(2)	0,0,(2)	0,0,(2)	SRR317043(1;1),SRR317063(1;1),
chr10	11911465	+	canonical	GGCTC(A*)C	A	11911488	-23	expected	1	1	no	no	yes	1,0,(0)	1,0,(0)	0,0,(0)	0,0,(0)	SRR317050(1;1),
chr10	12191571	+	canonical	TGCAC(A*)C	A	12191593	-22	expected	2	1	yes	no	yes	2,0,(0)	1,0,(0)	2,0,(0)	1,0,(0)	SRR307914(2;1),
chr10	17278268	+	canonical	TACTC(A*)T	A	17278292	-24	expected	21	9	yes	yes	yes	0,0,(21)	0,0,(9)	0,0,(21)	0,0,(9)	SRR545707(4;2),SRR545711(10;2),SRR534326(1;1),SRR545716(3;2),SRR545694(2;1),SRR317050(1;1),
chr10	17279205	+	canonical	TATTT(A*)T	A	17279228	-23	expected	33	17	yes	yes	yes	3,3,(27)	1,2,(14)	0,0,(27)	0,0,(14)	SRR545705(6;3),SRR545720(1;1),SRR534326(3;2),SRR545713(3;1),SRR545706(1;1),SRR545694(4;2),SRR545707(1;1),SRR534335(2;1),SRR545708(5;1),SRR545690(2;1),SRR534318(1;1),SRR545718(4;2),
chr10	27024371	+	canonical	TCCTT(A*)C	A	27024394	-23	expected	1	1	yes	no	yes	0,0,(1)	0,0,(1)	0,0,(1)	0,0,(1)	SRR315312(1;1),
chr10	43317472	+	canonical	TGCTG(A*)T	A	43317509	-37	expected	2	1	no	no	yes	2,0,(0)	1,0,(0)	0,0,(0)	0,0,(0)	SRR317054(2;1),
chr10	49635093	+	canonical	TACTG(A*)C	A	49635122	-29	expected	3	1	no	no	yes	3,0,(0)	1,0,(0)	0,0,(0)	0,0,(0)	SRR545717(3;1),
chr10	60558787	+	canonical	TCCTA(A*)T	A	60558815	-28	expected	1	1	yes	no	yes	0,0,(1)	0,0,(1)	0,0,(1)	0,0,(1)	SRR545704(1;1),
chr10	60580109	+	canonical	TATAG(A*)T	A	60580128	-19	expected	2	1	yes	no	yes	2,0,(0)	1,0,(0)	2,0,(0)	1,0,(0)	SRR545709(2;1),
chr10	63810621	+	canonical	TGTAT(A*)T	A	63810646	-25	expected	1	1	yes	no	yes	0,1,(0)	0,1,(0)	0,1,(0)	0,1,(0)	SRR315311(1;1),
chr10	63818974	+	canonical	TGCTT(A*)T	A	63819001	-27	expected	5	1	yes	no	yes	0,0,(5)	0,0,(1)	0,0,(5)	0,0,(1)	SRR545716(5;1),
chr10	70098872	+	canonical	TAGTC(A*)T	A	70098896	-24	expected	3	1	yes	no	yes	0,0,(3)	0,0,(1)	0,0,(3)	0,0,(1)	SRR534326(3;1),
chr10	70101286	+	canonical	TATTG(A*)T	A	70101341	-55	expected	1	1	yes	no	yes	0,0,(1)	0,0,(1)	0,0,(1)	0,0,(1)	SRR545720(1;1),
chr10	70721809	+	canonical	TATTG(A*)T	A	70721837	-28	expected	2	2	yes	no	yes	0,0,(2)	0,0,(2)	0,0,(2)	0,0,(2)	SRR545714(2;2),
chr10	70728707	+	canonical	TACTG(A*)C	A	70728731	-24	expected	1	1	no	no	yes	1,0,(0)	1,0,(0)	0,0,(0)	0,0,(0)	SRR317043(1;1),
chr10	71146045	+	canonical	TAATT(A*)C	A	71146078	-33	expected	3	3	yes	yes	yes	0,0,(3)	0,0,(3)	0,0,(3)	0,0,(3)	SRR307924(1;1),SRR317043(2;2),
chr10	71649152	+	canonical	TACTC(A*)C	A	71649169	-17	expected	1	1	yes	no	yes	0,0,(1)	0,0,(1)	0,0,(1)	0,0,(1)	SRR534289(1;1),
chr10	72630778	+	canonical	TTCTC(A*)T	A	72630804	-26	expected	1	1	yes	no	yes	0,0,(1)	0,0,(1)	0,0,(1)	0,0,(1)	SRR545717(1;1),
chr10	75554281	+	canonical	GACTT(A*)C	A	75554298	-17	expected	1	1	yes	no	yes	0,0,(1)	0,0,(1)	0,0,(1)	0,0,(1)	SRR545701(1;1),
chr10	75560379	+	canonical	TGCCC(A*)C	A	75560397	-18	expected	14	9	yes	yes	yes	0,14,(0)	0,9,(0)	0,7,(0)	0,5,(0)	SRR317041(1;1),SRR317065(4;3),SRR315318(2;1),SRR307913(4;1),SRR317050(2;2),SRR317044(1;1),
chr10	75674984	+	canonical	TGCAA(A*)C	A	75675008	-24	expected	1	1	yes	no	yes	0,1,(0)	0,1,(0)	0,1,(0)	0,1,(0)	SRR545720(1;1),
chr10	75856948	+	canonical	TGTAA(A*)C	A	75856961	-13	expected	1	1	yes	no	yes	0,1,(0)	0,1,(0)	0,1,(0)	0,1,(0)	SRR545717(1;1),
chr10	76780855	+	canonical	TGATT(A*)C	A	76780883	-28	expected	3	2	yes	no	yes	0,0,(3)	0,0,(2)	0,0,(3)	0,0,(2)	SRR317044(3;2),
chr10	76781755	+	canonical	TATTT(G*)C	G	76784715	-2960	distal	2	1	no	no	yes	0,0,(2)	0,0,(1)	0,0,(0)	0,0,(0)	SRR545714(2;1),
chr10	76977616	+	canonical	TATTG(A*)T	A	76977645	-29	expected	6	3	yes	yes	yes	0,0,(6)	0,0,(3)	0,0,(6)	0,0,(3)	SRR545690(4;1),SRR545689(1;1),SRR315309(1;1),
chr10	76978796	+	canonical	TGTTC(A*)T	A	76978820	-24	expected	3	1	yes	no	yes	0,0,(3)	0,0,(1)	0,0,(3)	0,0,(1)	SRR545713(3;1),
chr10	79796918	+	canonical	TGTTT(A*)C	A	79796951	-33	expected	1	1	yes	no	yes	0,0,(1)	0,0,(1)	0,0,(1)	0,0,(1)	SRR545694(1;1),
chr10	79800346	+	canonical	TGTTG(A*)C	A	79800372	-26	expected	3	2	no	yes	yes	3,0,(0)	2,0,(0)	0,0,(0)	0,0,(0)	SRR545716(1;1),SRR545701(2;1),
chr10	81058783	+	canonical	GGCTC(A*)C	A	81058806	-23	expected	2	2	yes	no	yes	0,0,(2)	0,0,(2)	0,0,(2)	0,0,(2)	SRR534317(2;2),
chr10	81113440	+	canonical	TGCTC(A*)C	A	81113462	-22	expected	16	2	yes	yes	yes	0,0,(16)	0,0,(2)	0,0,(16)	0,0,(2)	SRR545690(5;1),SRR545711(11;1),
chr10	85901180	+	canonical	TACTT(A*)T	A	85901217	-37	expected	1	1	yes	no	yes	0,0,(1)	0,0,(1)	0,0,(1)	0,0,(1)	SRR315312(1;1),
chr10	89690740	+	canonical	TATTA(G*)T	G	89690802	-62	distal	2	2	no	yes	yes	0,2,(0)	0,2,(0)	0,0,(0)	0,0,(0)	SRR317045(1;1),SRR317042(1;1),
chr10	90771733	+	canonical	AGTTG(A*)T	A	90771755	-22	expected	1	1	no	no	yes	1,0,(0)	1,0,(0)	0,0,(0)	0,0,(0)	SRR545720(1;1),
chr10	91486138	+	canonical	TGCTC(A*)C	A	91486169	-31	expected	1	1	yes	no	yes	0,0,(1)	0,0,(1)	0,0,(1)	0,0,(1)	SRR317055(1;1),
chr10	94700455	+	canonical	TGTTT(A*)T	A	94700483	-28	expected	1	1	yes	no	yes	0,0,(1)	0,0,(1)	0,0,(1)	0,0,(1)	SRR545708(1;1),
chr10	95266723	+	canonical	TGTTA(A*)C	A	95266744	-21	expected	1	1	yes	no	yes	0,0,(1)	0,0,(1)	0,0,(1)	0,0,(1)	SRR317050(1;1),
chr10	99190111	+	canonical	AGCTT(A*)T	A	99190135	-24	expected	1	1	yes	no	yes	0,0,(1)	0,0,(1)	0,0,(1)	0,0,(1)	SRR534326(1;1),
chr10	99498209	+	canonical	TGCAA(A*)T	A	99498233	-24	expected	1	1	no	no	yes	1,0,(0)	1,0,(0)	0,0,(0)	0,0,(0)	SRR317068(1;1),
chr10	99502829	+	canonical	TAGTG(A*)T	A	99502850	-21	expected	2	2	yes	yes	yes	0,2,(0)	0,2,(0)	0,2,(0)	0,2,(0)	SRR317049(1;1),SRR317055(1;1),
chr10	101515346	+	canonical	TAATA(A*)C	A	101515381	-35	expected	8	1	no	no	yes	8,0,(0)	1,0,(0)	0,0,(0)	0,0,(0)	SRR545711(8;1),
chr10	101544324	+	canonical	TCTTC(A*)C	A	101544364	-40	expected	3	1	no	no	yes	0,0,(3)	0,0,(1)	0,0,(0)	0,0,(0)	SRR317063(3;1),
chr10	101563756	+	canonical	TCCTA(A*)T	A	101563775	-19	expected	2	2	yes	no	yes	0,0,(2)	0,0,(2)	0,0,(2)	0,0,(2)	SRR307914(2;2),
chr10	102716184	+	canonical	TTTTC(A*)T	A	102716207	-23	expected	2	1	yes	no	yes	0,0,(2)	0,0,(1)	0,0,(2)	0,0,(1)	SRR317049(2;1),
chr10	103909877	+	canonical	TGCTA(G*)T	G	103916775	-6898	distal	1	1	yes	no	yes	0,1,(0)	0,1,(0)	0,1,(0)	0,1,(0)	SRR315309(1;1),
chr10	104117776	+	canonical	TGCTA(A*)T	A	104117795	-19	expected	1	1	yes	no	yes	0,0,(1)	0,0,(1)	0,0,(1)	0,0,(1)	SRR545687(1;1),
chr10	104122989	+	canonical	TCTTC(A*)C	A	104123012	-23	expected	1	1	yes	no	yes	0,0,(1)	0,0,(1)	0,0,(1)	0,0,(1)	SRR307931(1;1),
chr10	104414802	+	canonical	TGCTT(A*)C	A	104414836	-34	expected	1	1	yes	no	yes	0,0,(1)	0,0,(1)	0,0,(1)	0,0,(1)	SRR317044(1;1),
chr10	104414814	+	canonical	TGCCC(A*)C	A	104414836	-22	expected	2	1	yes	no	yes	0,0,(2)	0,0,(1)	0,0,(2)	0,0,(1)	SRR317062(2;1),
chr10	104497397	+	canonical	TGCTC(A*)T	A	104497419	-22	expected	14	3	yes	no	yes	0,0,(14)	0,0,(3)	0,0,(14)	0,0,(3)	SRR317056(14;3),
chr10	105200022	+	canonical	TCTTT(A*)C	A	105200046	-24	expected	1	1	yes	no	yes	0,0,(1)	0,0,(1)	0,0,(1)	0,0,(1)	SRR317062(1;1),
chr10	105205102	+	canonical	GACTG(A*)C	A	105205134	-32	expected	1	1	no	no	yes	1,0,(0)	1,0,(0)	0,0,(0)	0,0,(0)	SRR315310(1;1),
chr10	106019311	+	canonical	TCTTC(A*)T	A	106019333	-22	expected	2	1	no	no	yes	0,0,(2)	0,0,(1)	0,0,(0)	0,0,(0)	SRR534326(2;1),
chr10	106026981	+	canonical	AGCTC(A*)C	A	106027009	-28	expected	1	1	yes	no	yes	0,0,(1)	0,0,(1)	0,0,(1)	0,0,(1)	SRR545703(1;1),
chr10	111877076	+	canonical	TAGTA(A*)T	A	111877099	-23	expected	1	1	no	no	yes	0,1,(0)	0,1,(0)	0,0,(0)	0,0,(0)	SRR315317(1;1),
chr10	112262445	+	canonical	TGCTT(A*)C	A	112262478	-33	expected	1	1	no	no	yes	0,1,(0)	0,1,(0)	0,0,(0)	0,0,(0)	SRR317063(1;1),
chr10	112335072	+	canonical	TACTA(A*)T	A	112335093	-21	expected	1	1	no	no	yes	0,1,(0)	0,1,(0)	0,0,(0)	0,0,(0)	SRR545690(1;1),
chr10	112343915	+	canonical	TTTTC(A*)T	A	112343940	-25	expected	2	2	yes	no	yes	0,0,(2)	0,0,(2)	0,0,(2)	0,0,(2)	SRR317050(2;2),
chr10	112360170	+	canonical	TGCTT(A*)T	A	112360196	-26	expected	2	2	yes	yes	yes	0,1,(1)	0,1,(1)	0,0,(1)	0,0,(1)	SRR534335(1;1),SRR315309(1;1),
chr10	115481380	+	canonical	TGCTC(A*)C	A	115481409	-29	expected	1	1	yes	no	yes	0,1,(0)	0,1,(0)	0,1,(0)	0,1,(0)	SRR534311(1;1),
chr10	120895950	+	canonical	TACTA(A*)C	A	120895982	-32	expected	1	1	yes	no	yes	0,0,(1)	0,0,(1)	0,0,(1)	0,0,(1)	SRR307923(1;1),
chr10	121671522	+	canonical	TGTTA(A*)T	A	121671555	-33	expected	11	1	yes	no	yes	0,0,(11)	0,0,(1)	0,0,(11)	0,0,(1)	SRR545712(11;1),
chr10	122612010	+	canonical	TACTT(A*)A	A	122612035	-25	expected	3	1	no	no	yes	3,0,(0)	1,0,(0)	0,0,(0)	0,0,(0)	SRR307913(3;1),
chr10	122626056	+	canonical	TTCTG(A*)T	A	122626080	-24	expected	2	2	yes	yes	yes	0,0,(2)	0,0,(2)	0,0,(2)	0,0,(2)	SRR317050(1;1),SRR545688(1;1),
chr10	126507927	+	canonical	TGTTA(G*)T	G	126507952	-25	expected	1	1	yes	no	yes	0,1,(0)	0,1,(0)	0,1,(0)	0,1,(0)	SRR317063(1;1),
chr11	406569	-	canonical	TGTTC(A*)C	A	406538	-31	expected	5	1	yes	no	yes	0,0,(5)	0,0,(1)	0,0,(5)	0,0,(1)	SRR545694(5;1),
chr11	408916	-	canonical	AGCTG(A*)C	A	408893	-23	expected	1	1	no	no	yes	1,0,(0)	1,0,(0)	0,0,(0)	0,0,(0)	SRR317039(1;1),
chr11	500017	-	canonical	TGCTG(A*)C	A	499999	-18	expected	1	1	yes	no	yes	0,0,(1)	0,0,(1)	0,0,(1)	0,0,(1)	SRR545704(1;1),
chr11	500198	-	canonical	TGCAG(A*)C	A	499999	-199	distal	2	1	yes	no	yes	2,0,(0)	1,0,(0)	2,0,(0)	1,0,(0)	SRR545692(2;1),
chr11	557664	-	canonical	TGCCC(A*)C	A	557640	-24	expected	1	1	no	no	yes	1,0,(0)	1,0,(0)	0,0,(0)	0,0,(0)	SRR317048(1;1),
chr11	644677	-	canonical	TGCTG(A*)C	A	644654	-23	expected	2	1	yes	no	yes	0,0,(2)	0,0,(1)	0,0,(2)	0,0,(1)	SRR545717(2;1),
chr11	802109	-	canonical	TGCTC(A*)C	A	802090	-19	expected	1	1	yes	no	yes	0,0,(1)	0,0,(1)	0,0,(1)	0,0,(1)	SRR317042(1;1),
chr11	1587184	-	canonical	TGCTG(A*)C	A	1587164	-20	expected	3	1	no	no	yes	3,0,(0)	1,0,(0)	0,0,(0)	0,0,(0)	SRR545690(3;1),
chr11	2185649	-	canonical	AGTTG(A*)C	A	2185622	-27	expected	1	1	no	no	yes	0,0,(1)	0,0,(1)	0,0,(0)	0,0,(0)	SRR545685(1;1),
chr11	2189439	-	canonical	AGCTC(A*)C	A	2189409	-30	expected	2	1	yes	no	yes	0,0,(2)	0,0,(1)	0,0,(2)	0,0,(1)	SRR545686(2;1),
chr11	2970524	-	canonical	TGCTG(A*)C	A	2970494	-30	expected	3	1	no	no	yes	3,0,(0)	1,0,(0)	0,0,(0)	0,0,(0)	SRR545715(3;1),
chr11	2979794	-	canonical	TCCTG(A*)C	A	2979774	-20	expected	1	1	no	no	yes	1,0,(0)	1,0,(0)	0,0,(0)	0,0,(0)	SRR534334(1;1),
chr11	3040003	-	canonical	TGTTG(A*)C	A	3039979	-24	expected	2	1	yes	no	yes	0,0,(2)	0,0,(1)	0,0,(2)	0,0,(1)	SRR317042(2;1),
chr11	3123533	-	canonical	TCCTC(A*)C	A	3123511	-22	expected	1	1	no	no	yes	0,1,(0)	0,1,(0)	0,0,(0)	0,0,(0)	SRR317049(1;1),
chr11	3700966	-	canonical	TGCAG(A*)C	A	3700938	-28	expected	8	2	yes	yes	yes	1,0,(7)	1,0,(1)	0,0,(7)	0,0,(1)	SRR317063(1;1),SRR545694(7;1),
chr11	5263517	-	canonical	TATTC(A*)C	A	5263477	-40	expected	1	1	yes	no	yes	0,0,(1)	0,0,(1)	0,0,(1)	0,0,(1)	SRR317042(1;1),
chr11	6632707	-	canonical	TGCTG(A*)C	A	6632683	-24	expected	2	2	no	yes	yes	2,0,(0)	2,0,(0)	0,0,(0)	0,0,(0)	SRR317039(1;1),SRR315306(1;1),
chr11	8772293	-	canonical	GGCTT(A*)C	A	8772272	-21	expected	1	1	yes	no	yes	0,0,(1)	0,0,(1)	0,0,(1)	0,0,(1)	SRR534326(1;1),
chr11	9161817	-	canonical	TAATA(A*)T	A	9161401	-416	distal	1	1	no	no	yes	0,1,(0)	0,1,(0)	0,0,(0)	0,0,(0)	SRR317065(1;1),
chr11	9308161	-	canonical	TGCTA(A*)T	A	9308140	-21	expected	1	1	yes	no	yes	0,0,(1)	0,0,(1)	0,0,(1)	0,0,(1)	SRR317054(1;1),
chr11	10649334	-	canonical	TGCTG(A*)C	A	10649310	-24	expected	1	1	no	no	yes	1,0,(0)	1,0,(0)	0,0,(0)	0,0,(0)	SRR315317(1;1),
chr11	10822662	-	canonical	TGTTA(A*)T	A	10822634	-28	expected	5	2	yes	yes	yes	1,0,(4)	1,0,(1)	0,0,(4)	0,0,(1)	SRR534335(4;1),SRR315306(1;1),
chr11	13426229	-	canonical	TAGTA(A*)T	A	13424825	-1404	distal	2	2	no	yes	yes	0,2,(0)	0,2,(0)	0,0,(0)	0,0,(0)	SRR317067(1;1),SRR317064(1;1),
chr11	14526829	-	canonical	TGTTC(A*)T	A	14526794	-35	expected	1	1	yes	no	yes	0,0,(1)	0,0,(1)	0,0,(1)	0,0,(1)	SRR317043(1;1),
chr11	14540613	-	canonical	TATTA(A*)C	A	14540587	-26	expected	1	1	yes	no	yes	0,0,(1)	0,0,(1)	0,0,(1)	0,0,(1)	SRR545692(1;1),
chr11	16811446	-	canonical	TGCTT(G*)C	G	16811425	-21	expected	1	1	yes	no	yes	0,0,(1)	0,0,(1)	0,0,(1)	0,0,(1)	SRR317063(1;1),
chr11	17113858	-	canonical	TACTT(A*)T	A	17113823	-35	expected	1	1	yes	no	yes	0,0,(1)	0,0,(1)	0,0,(1)	0,0,(1)	SRR534317(1;1),
chr11	18316744	-	canonical	TATTC(A*)T	A	18316716	-28	expected	4	1	yes	no	yes	0,0,(4)	0,0,(1)	0,0,(4)	0,0,(1)	SRR545712(4;1),
chr11	18637670	-	canonical	TAATA(A*)C	A	18637645	-25	expected	1	1	yes	no	yes	0,0,(1)	0,0,(1)	0,0,(1)	0,0,(1)	SRR545718(1;1),
chr11	27520381	-	canonical	TATTA(G*)T	G	27520351	-30	expected	1	1	yes	no	yes	0,1,(0)	0,1,(0)	0,1,(0)	0,1,(0)	SRR545706(1;1),
chr11	33776072	-	canonical	TTTTT(A*)T	A	33776046	-26	expected	3	1	yes	no	yes	0,0,(3)	0,0,(1)	0,0,(3)	0,0,(1)	SRR545701(3;1),
chr11	33792433	-	canonical	TCTTT(A*)T	A	33792376	-57	expected	1	1	yes	no	yes	0,0,(1)	0,0,(1)	0,0,(1)	0,0,(1)	SRR317042(1;1),
chr11	34905081	-	canonical	TTTTA(A*)T	A	34905051	-30	expected	2	2	no	yes	yes	0,2,(0)	0,2,(0)	0,0,(0)	0,0,(0)	SRR545688(1;1),SRR534317(1;1),
chr11	36518838	-	canonical	TGCTA(A*)T	A	36518816	-22	expected	3	2	yes	yes	yes	0,0,(3)	0,0,(2)	0,0,(3)	0,0,(2)	SRR315309(2;1),SRR317063(1;1),
chr11	45971055	-	canonical	TGCTA(A*)T	A	45971032	-23	expected	1	1	yes	no	yes	0,1,(0)	0,1,(0)	0,1,(0)	0,1,(0)	SRR317054(1;1),
chr11	46001550	-	canonical	TTCTA(A*)T	A	46001517	-33	expected	1	1	yes	no	yes	1,0,(0)	1,0,(0)	1,0,(0)	1,0,(0)	SRR545688(1;1),
chr11	46515278	-	canonical	TTTTC(A*)C	A	46515258	-20	expected	3	2	yes	yes	yes	0,0,(3)	0,0,(2)	0,0,(3)	0,0,(2)	SRR317045(2;1),SRR317054(1;1),
chr11	47189840	-	canonical	TGCCT(A*)T	A	47189802	-38	expected	1	1	yes	no	yes	0,0,(1)	0,0,(1)	0,0,(1)	0,0,(1)	SRR317035(1;1),
chr11	47444545	-	canonical	TCCTC(A*)C	A	47444524	-21	expected	1	1	no	no	yes	0,0,(1)	0,0,(1)	0,0,(0)	0,0,(0)	SRR317044(1;1),
chr11	47494812	-	canonical	CACTG(A*)T	A	47494783	-29	expected	1	1	no	no	yes	1,0,(0)	1,0,(0)	0,0,(0)	0,0,(0)	SRR545687(1;1),
chr11	47744896	-	canonical	TTTTT(A*)T	A	47744868	-28	expected	2	1	no	no	yes	2,0,(0)	1,0,(0)	0,0,(0)	0,0,(0)	SRR545715(2;1),
chr11	47802028	-	canonical	TGCAG(A*)C	A	47801999	-29	expected	1	1	no	no	yes	1,0,(0)	1,0,(0)	0,0,(0)	0,0,(0)	SRR534325(1;1),
chr11	47813571	-	canonical	TTTTC(A*)C	A	47813542	-29	expected	22	11	yes	yes	yes	0,0,(22)	0,0,(11)	0,0,(11)	0,0,(6)	SRR545715(4;1),SRR545688(1;1),SRR545717(3;1),SRR545716(1;1),SRR545687(2;1),SRR317043(1;1),SRR545708(1;1),SRR545714(5;2),SRR545690(4;2),
chr11	47834007	-	canonical	TAGTA(A*)T	A	47833981	-26	expected	1	1	no	no	yes	0,1,(0)	0,1,(0)	0,0,(0)	0,0,(0)	SRR315309(1;1),
chr11	47869528	-	canonical	GGCTG(A*)C	A	47869511	-17	expected	1	1	no	no	yes	1,0,(0)	1,0,(0)	0,0,(0)	0,0,(0)	SRR317042(1;1),
chr11	57099388	-	canonical	CACTA(A*)C	A	57099363	-25	expected	34	6	yes	yes	yes	4,1,(29)	1,1,(4)	4,0,(29)	1,0,(4)	SRR545693(1;1),SRR545701(4;1),SRR317063(1;1),SRR317057(28;3),
chr11	57297726	-	canonical	TGCTG(A*)T	A	57297707	-19	expected	1	1	no	no	yes	1,0,(0)	1,0,(0)	0,0,(0)	0,0,(0)	SRR534334(1;1),
chr11	58295234	-	canonical	TCTTG(A*)C	A	58295196	-38	expected	1	1	no	no	yes	1,0,(0)	1,0,(0)	0,0,(0)	0,0,(0)	SRR317065(1;1),
chr11	61067717	-	canonical	TCCTC(A*)C	A	61067691	-26	expected	2	1	no	no	yes	2,0,(0)	1,0,(0)	0,0,(0)	0,0,(0)	SRR317063(2;1),
chr11	61070661	-	canonical	TGCTG(A*)T	A	61070627	-34	expected	5	3	yes	yes	yes	2,0,(3)	2,0,(1)	0,0,(3)	0,0,(1)	SRR317048(1;1),SRR315310(1;1),SRR545720(3;1),
chr11	61572264	-	canonical	TGCTC(A*)T	A	61572233	-31	expected	2	1	no	no	yes	0,0,(2)	0,0,(1)	0,0,(0)	0,0,(0)	SRR534318(2;1),
chr11	61574217	-	canonical	TGCTC(A*)T	A	61574196	-21	expected	5	4	yes	yes	yes	2,0,(3)	2,0,(2)	0,0,(3)	0,0,(2)	SRR545704(1;1),SRR317064(1;1),SRR317039(2;1),SRR315305(1;1),
chr11	62303600	-	canonical	CACTG(A*)C	A	62303570	-30	expected	4	1	no	no	yes	4,0,(0)	1,0,(0)	0,0,(0)	0,0,(0)	SRR545708(4;1),
chr11	62340243	-	canonical	TACTC(A*)T	A	62340214	-29	expected	1	1	no	no	yes	0,0,(1)	0,0,(1)	0,0,(0)	0,0,(0)	SRR315306(1;1),
chr11	62458554	-	canonical	TGCTC(A*)T	A	62458345	-209	distal	2	1	no	no	yes	2,0,(0)	1,0,(0)	0,0,(0)	0,0,(0)	SRR317042(2;1),
chr11	62491494	-	canonical	TGTTT(A*)C	A	62491462	-32	expected	4	2	yes	yes	yes	0,0,(4)	0,0,(2)	0,0,(4)	0,0,(2)	SRR317050(3;1),SRR317042(1;1),
chr11	62493369	-	canonical	TGCTA(G*)T	G	62491898	-1471	distal	4	2	yes	yes	yes	0,4,(0)	0,2,(0)	0,4,(0)	0,2,(0)	SRR545705(3;1),SRR545691(1;1),
chr11	62569766	-	canonical	TACTT(A*)T	A	62569732	-34	expected	3	2	yes	yes	yes	0,0,(3)	0,0,(2)	0,0,(3)	0,0,(2)	SRR545709(2;1),SRR545690(1;1),
chr11	62601145	-	canonical	TGCAG(G*)T	G	62600603	-542	distal	8	4	no	no	yes	8,0,(0)	4,0,(0)	0,0,(0)	0,0,(0)	SRR317049(8;4),
chr11	62621082	-	canonical	TACTG(A*)C	A	62621062	-20	expected	5	2	no	yes	yes	5,0,(0)	2,0,(0)	0,0,(0)	0,0,(0)	SRR317043(3;1),SRR317042(2;1),
chr11	62621541	-	canonical	TTTTG(A*)T	A	62621536	-5	proximal	1	1	no	no	yes	0,1,(0)	0,1,(0)	0,0,(0)	0,0,(0)	SRR534318(1;1),
chr11	62622709	-	canonical	TGTTA(G*)T	G	62622688	-21	expected	8	6	yes	yes	yes	1,7,(0)	1,5,(0)	0,7,(0)	0,5,(0)	SRR317042(1;1),SRR315311(3;2),SRR317039(3;2),SRR315309(1;1),
chr11	63403836	-	canonical	GGCTT(A*)T	A	63403806	-30	expected	3	2	yes	yes	yes	0,0,(3)	0,0,(2)	0,0,(1)	0,0,(1)	SRR545717(1;1),SRR534317(2;1),
chr11	64521835	-	canonical	GACTG(A*)C	A	64521817	-18	expected	1	1	no	no	yes	1,0,(0)	1,0,(0)	0,0,(0)	0,0,(0)	SRR315311(1;1),
chr11	64574714	-	canonical	GGCTC(A*)T	A	64574691	-23	expected	9	4	no	yes	yes	0,0,(9)	0,0,(4)	0,0,(0)	0,0,(0)	SRR317039(1;1),SRR545719(6;1),SRR545720(1;1),SRR545717(1;1),
chr11	64574770	-	canonical	TTCTG(A*)C	A	64574691	-79	distal	1	1	no	no	yes	0,1,(0)	0,1,(0)	0,0,(0)	0,0,(0)	SRR317064(1;1),
chr11	64670183	-	canonical	TGTTC(A*)C	A	64670152	-31	expected	4	2	yes	yes	yes	0,0,(4)	0,0,(2)	0,0,(4)	0,0,(2)	SRR545691(2;1),SRR317049(2;1),
chr11	64898511	-	canonical	TCCTA(A*)C	A	64898507	-4	proximal	1	1	no	no	yes	0,0,(1)	0,0,(1)	0,0,(0)	0,0,(0)	SRR307931(1;1),
chr11	65427287	-	canonical	TCCTG(A*)T	A	65427268	-19	expected	1	1	no	no	yes	0,0,(1)	0,0,(1)	0,0,(0)	0,0,(0)	SRR315305(1;1),
chr11	65622945	-	canonical	TGCTC(A*)C	A	65622919	-26	expected	7	4	yes	yes	yes	2,0,(5)	2,0,(2)	1,0,(1)	1,0,(1)	SRR317043(1;1),SRR317062(1;1),SRR317049(4;1),SRR317039(1;1),
chr11	65660789	-	canonical	TTCTG(A*)C	A	65660767	-22	expected	8	3	yes	yes	yes	2,0,(6)	1,0,(2)	0,0,(6)	0,0,(2)	SRR534334(2;1),SRR545693(5;1),SRR545694(1;1),
chr11	66461351	-	canonical	CACTG(A*)C	A	66461332	-19	expected	2	1	no	no	yes	2,0,(0)	1,0,(0)	0,0,(0)	0,0,(0)	SRR307914(2;1),
chr11	66481244	-	canonical	TTCTG(A*)T	A	66481217	-27	expected	4	1	no	no	yes	4,0,(0)	1,0,(0)	0,0,(0)	0,0,(0)	SRR545707(4;1),
chr11	67168410	-	canonical	AGCTT(A*)C	A	67168390	-20	expected	1	1	yes	no	yes	0,0,(1)	0,0,(1)	0,0,(1)	0,0,(1)	SRR315311(1;1),
chr11	67208359	-	canonical	TGCCA(A*)C	A	67207955	-404	distal	1	1	yes	no	yes	0,1,(0)	0,1,(0)	0,1,(0)	0,1,(0)	SRR317047(1;1),
chr11	67209002	-	canonical	AGCTG(A*)C	A	67208985	-17	expected	1	1	no	no	yes	1,0,(0)	1,0,(0)	0,0,(0)	0,0,(0)	SRR317036(1;1),
chr11	67265517	-	canonical	TCCTG(A*)T	A	67265495	-22	expected	2	2	yes	yes	yes	0,0,(2)	0,0,(2)	0,0,(1)	0,0,(1)	SRR317051(1;1),SRR307914(1;1),
chr11	67832118	-	canonical	TCCTA(A*)C	A	67832098	-20	expected	2	1	no	no	yes	0,0,(2)	0,0,(1)	0,0,(0)	0,0,(0)	SRR534325(2;1),
chr11	71730056	-	canonical	CGCTT(A*)C	A	71730026	-30	expected	4	2	yes	yes	yes	0,0,(4)	0,0,(2)	0,0,(4)	0,0,(2)	SRR534334(2;1),SRR317063(2;1),
chr11	71821293	-	canonical	GGCTT(A*)C	A	71821271	-22	expected	1	1	yes	no	yes	0,0,(1)	0,0,(1)	0,0,(1)	0,0,(1)	SRR317036(1;1),
chr11	72404534	-	canonical	TGCCC(A*)C	A	72404515	-19	expected	1	1	yes	no	yes	0,1,(0)	0,1,(0)	0,1,(0)	0,1,(0)	SRR534335(1;1),
chr11	73850036	-	canonical	TGCTG(A*)T	A	73850012	-24	expected	11	6	yes	yes	yes	10,0,(1)	5,0,(1)	1,0,(1)	1,0,(1)	SRR534317(2;1),SRR534325(2;1),SRR534335(1;1),SRR545707(4;1),SRR317043(1;1),SRR317044(1;1),
chr11	74980026	-	canonical	GGCTC(A*)C	A	74980003	-23	expected	3	3	yes	yes	yes	0,0,(3)	0,0,(3)	0,0,(3)	0,0,(3)	SRR307914(1;1),SRR315318(1;1),SRR317049(1;1),
chr11	74987983	-	canonical	GACTC(A*)C	A	74987955	-28	expected	2	1	yes	no	yes	0,0,(2)	0,0,(1)	0,0,(2)	0,0,(1)	SRR317050(2;1),
chr11	77396236	-	canonical	TGCAA(A*)T	A	77396204	-32	expected	1	1	yes	no	yes	1,0,(0)	1,0,(0)	1,0,(0)	1,0,(0)	SRR545701(1;1),
chr11	77404676	-	canonical	GGTTG(A*)C	A	77404656	-20	expected	6	2	yes	no	yes	0,0,(6)	0,0,(2)	0,0,(6)	0,0,(2)	SRR545705(6;2),
chr11	77702378	-	canonical	TGCAG(A*)T	A	77702345	-33	expected	1	1	no	no	yes	1,0,(0)	1,0,(0)	0,0,(0)	0,0,(0)	SRR534289(1;1),
chr11	77931513	-	canonical	CACTC(A*)C	A	77931490	-23	expected	5	4	no	yes	yes	0,0,(5)	0,0,(4)	0,0,(0)	0,0,(0)	SRR545714(2;1),SRR317048(1;1),SRR534325(1;1),SRR317062(1;1),
chr11	77936270	-	canonical	TACTT(A*)T	A	77936248	-22	expected	7	5	yes	yes	yes	2,2,(3)	1,1,(3)	2,0,(3)	1,0,(3)	SRR545704(1;1),SRR534332(1;1),SRR545690(2;1),SRR317045(3;2),
chr11	85416099	-	canonical	TTTTC(A*)T	A	85416071	-28	expected	1	1	no	no	yes	0,0,(1)	0,0,(1)	0,0,(0)	0,0,(0)	SRR315318(1;1),
chr11	85429911	-	canonical	TGTTA(A*)C	A	85429886	-25	expected	1	1	yes	no	yes	0,1,(0)	0,1,(0)	0,1,(0)	0,1,(0)	SRR545707(1;1),
chr11	85714505	-	canonical	TATTT(G*)T	G	85714494	-11	expected	1	1	no	no	yes	0,1,(0)	0,1,(0)	0,0,(0)	0,0,(0)	SRR315317(1;1),
chr11	88033838	-	canonical	TGTTG(A*)T	A	88033813	-25	expected	1	1	yes	no	yes	0,0,(1)	0,0,(1)	0,0,(1)	0,0,(1)	SRR317043(1;1),
chr11	93470424	-	canonical	TACTT(A*)T	A	93470405	-19	expected	13	6	yes	yes	yes	0,2,(11)	0,2,(4)	0,0,(11)	0,0,(4)	SRR534325(1;1),SRR307923(2;2),SRR545711(8;1),SRR317055(1;1),SRR317043(1;1),
chr11	95521749	-	canonical	TACTG(A*)C	A	95521727	-22	expected	10	2	yes	yes	yes	5,0,(5)	1,0,(1)	0,0,(5)	0,0,(1)	SRR545721(5;1),SRR545705(5;1),
chr11	102953603	-	canonical	TGCTG(A*)C	A	102953568	-35	expected	2	1	no	no	yes	2,0,(0)	1,0,(0)	0,0,(0)	0,0,(0)	SRR545713(2;1),
chr11	108061255	-	canonical	TTTTG(A*)T	A	108061227	-28	expected	3	2	yes	yes	yes	1,0,(2)	1,0,(1)	0,0,(2)	0,0,(1)	SRR315305(1;1),SRR307930(2;1),
chr11	110104226	-	canonical	TGCTC(A*)T	A	110104204	-22	expected	1	1	no	no	yes	0,0,(1)	0,0,(1)	0,0,(0)	0,0,(0)	SRR317055(1;1),
chr11	111779725	-	canonical	TTCTT(A*)T	A	111779691	-34	expected	1	1	yes	no	yes	0,0,(1)	0,0,(1)	0,0,(1)	0,0,(1)	SRR317044(1;1),
chr11	116652987	-	canonical	TATTC(A*)C	A	116652960	-27	expected	1	1	yes	no	yes	0,0,(1)	0,0,(1)	0,0,(1)	0,0,(1)	SRR545704(1;1),
chr11	116730343	-	canonical	TGGTC(A*)C	A	116730320	-23	expected	7	3	yes	yes	yes	0,0,(7)	0,0,(3)	0,0,(5)	0,0,(2)	SRR534318(4;1),SRR315309(1;1),SRR317044(2;1),
chr11	117164747	-	canonical	GACTC(A*)C	A	117164724	-23	expected	5	3	yes	yes	yes	0,3,(2)	0,1,(2)	0,0,(2)	0,0,(2)	SRR534332(1;1),SRR317049(3;1),SRR534331(1;1),
chr11	118425318	-	canonical	TTCTT(A*)C	A	118425302	-16	expected	1	1	no	no	yes	0,0,(1)	0,0,(1)	0,0,(0)	0,0,(0)	SRR534325(1;1),
chr11	118888298	-	canonical	TGCTT(C*)T	C	118888255	-43	expected	6	1	yes	no	yes	0,0,(6)	0,0,(1)	0,0,(6)	0,0,(1)	SRR545712(6;1),
chr11	118919947	-	canonical	TCCTG(A*)T	A	118919915	-32	expected	6	2	yes	yes	yes	5,1,(0)	1,1,(0)	0,1,(0)	0,1,(0)	SRR545685(5;1),SRR545692(1;1),
chr11	121935000	-	canonical	TTTTT(A*)T	A	121934979	-21	expected	5	1	no	no	yes	0,0,(5)	0,0,(1)	0,0,(0)	0,0,(0)	SRR545719(5;1),
chr11	123599945	-	canonical	TACTG(A*)T	A	123599922	-23	expected	1	1	yes	no	yes	0,0,(1)	0,0,(1)	0,0,(1)	0,0,(1)	SRR534289(1;1),
chr11	123601724	-	canonical	TGCTT(A*)T	A	123601693	-31	expected	3	2	yes	no	yes	0,0,(3)	0,0,(2)	0,0,(3)	0,0,(2)	SRR545718(3;2),
chr11	124628443	-	canonical	CACTC(A*)C	A	124628423	-20	expected	6	3	yes	yes	yes	0,0,(6)	0,0,(3)	0,0,(5)	0,0,(2)	SRR545718(3;1),SRR545707(2;1),SRR545717(1;1),
chr11	125831026	-	canonical	TGATA(A*)T	A	125831000	-26	expected	6	1	no	no	yes	6,0,(0)	1,0,(0)	0,0,(0)	0,0,(0)	SRR545686(6;1),
chr11	126134209	-	canonical	TTCTT(A*)C	A	126134184	-25	expected	1	1	yes	no	yes	0,0,(1)	0,0,(1)	0,0,(1)	0,0,(1)	SRR317043(1;1),
chr11	128332502	-	canonical	TGCCT(A*)C	A	128332471	-31	expected	8	6	yes	yes	yes	0,0,(8)	0,0,(6)	0,0,(6)	0,0,(5)	SRR545689(1;1),SRR534289(1;1),SRR545692(2;1),SRR545690(4;3),
chr11	129747302	-	canonical	GGTTG(A*)T	A	129747280	-22	expected	1	1	yes	no	yes	0,0,(1)	0,0,(1)	0,0,(1)	0,0,(1)	SRR317039(1;1),
chr11	129748466	-	canonical	TTCTT(A*)T	A	129748438	-28	expected	1	1	yes	no	yes	0,0,(1)	0,0,(1)	0,0,(1)	0,0,(1)	SRR317065(1;1),
chr11	129787155	-	canonical	TTCTC(A*)T	A	129787132	-23	expected	3	3	yes	yes	yes	0,0,(3)	0,0,(3)	0,0,(3)	0,0,(3)	SRR317050(2;2),SRR307930(1;1),
chr11	130183929	-	canonical	TGTTT(T*)T	T	130131824	-52105	distal	1	1	no	no	yes	0,0,(1)	0,0,(1)	0,0,(0)	0,0,(0)	SRR545718(1;1),
chr11	134028410	-	canonical	TACAT(A*)C	A	134028390	-20	expected	1	1	yes	no	yes	1,0,(0)	1,0,(0)	1,0,(0)	1,0,(0)	SRR315317(1;1),
chr11	134120261	-	canonical	TAATG(A*)T	A	134120237	-24	expected	1	1	yes	no	yes	0,1,(0)	0,1,(0)	0,1,(0)	0,1,(0)	SRR545686(1;1),
chr11	210545	+	canonical	TCCTC(A*)C	A	210570	-25	expected	5	1	no	no	yes	0,0,(5)	0,0,(1)	0,0,(0)	0,0,(0)	SRR534318(5;1),
chr11	252475	+	canonical	TCTTA(A*)C	A	252504	-29	expected	3	1	yes	no	yes	0,0,(3)	0,0,(1)	0,0,(3)	0,0,(1)	SRR545705(3;1),
chr11	592540	+	canonical	TGGTG(A*)C	A	592558	-18	expected	2	2	yes	yes	yes	1,0,(1)	1,0,(1)	0,0,(1)	0,0,(1)	SRR317048(1;1),SRR317042(1;1),
chr11	605093	+	canonical	TGTTC(A*)T	A	605118	-25	expected	3	3	yes	yes	yes	0,0,(3)	0,0,(3)	0,0,(3)	0,0,(3)	SRR545709(1;1),SRR317042(1;1),SRR315310(1;1),
chr11	720468	+	canonical	TCCTC(A*)T	A	720548	-80	distal	2	1	yes	no	yes	0,0,(2)	0,0,(1)	0,0,(2)	0,0,(1)	SRR545706(2;1),
chr11	721541	+	canonical	GGCTG(A*)C	A	721564	-23	expected	6	4	yes	yes	yes	4,0,(2)	2,0,(2)	0,0,(2)	0,0,(2)	SRR317041(2;2),SRR545685(4;2),
chr11	2424051	+	canonical	TCCTG(A*)T	A	2424074	-23	expected	1	1	yes	no	yes	0,0,(1)	0,0,(1)	0,0,(1)	0,0,(1)	SRR317065(1;1),
chr11	4143343	+	canonical	TTCTT(A*)T	A	4143370	-27	expected	1	1	yes	no	yes	0,0,(1)	0,0,(1)	0,0,(1)	0,0,(1)	SRR545707(1;1),
chr11	4154768	+	canonical	TCTTC(A*)T	A	4154792	-24	expected	1	1	yes	no	yes	0,0,(1)	0,0,(1)	0,0,(1)	0,0,(1)	SRR317042(1;1),
chr11	7655694	+	canonical	TTCTC(A*)T	A	7655725	-31	expected	3	1	yes	no	yes	0,0,(3)	0,0,(1)	0,0,(3)	0,0,(1)	SRR534318(3;1),
chr11	9455093	+	canonical	TGCAT(A*)T	A	9455116	-23	expected	6	5	yes	yes	yes	6,0,(0)	5,0,(0)	6,0,(0)	5,0,(0)	SRR545694(1;1),SRR317039(1;1),SRR545718(2;1),SRR545702(1;1),SRR317062(1;1),
chr11	9463594	+	canonical	TATTC(A*)T	A	9463627	-33	expected	1	1	yes	no	yes	0,0,(1)	0,0,(1)	0,0,(1)	0,0,(1)	SRR315312(1;1),
chr11	9598659	+	canonical	TATTT(A*)C	A	9598688	-29	expected	1	1	yes	no	yes	0,0,(1)	0,0,(1)	0,0,(1)	0,0,(1)	SRR545694(1;1),
chr11	11974266	+	canonical	TGATG(A*)C	A	11974287	-21	expected	3	1	no	no	yes	0,0,(3)	0,0,(1)	0,0,(0)	0,0,(0)	SRR545719(3;1),
chr11	12231017	+	canonical	TGCCA(A*)C	A	12231043	-26	expected	3	1	yes	no	yes	0,3,(0)	0,1,(0)	0,3,(0)	0,1,(0)	SRR545685(3;1),
chr11	12281311	+	canonical	TACAG(A*)C	A	12281341	-30	expected	4	1	no	no	yes	4,0,(0)	1,0,(0)	0,0,(0)	0,0,(0)	SRR534318(4;1),
chr11	18426923	+	canonical	TATTA(A*)T	A	18426995	-72	distal	1	1	yes	no	yes	0,0,(1)	0,0,(1)	0,0,(1)	0,0,(1)	SRR545693(1;1),
chr11	19185823	+	canonical	TGGTA(A*)T	A	19185847	-24	expected	1	1	no	no	yes	1,0,(0)	1,0,(0)	0,0,(0)	0,0,(0)	SRR545692(1;1),
chr11	19186574	+	canonical	TGCTT(A*)G	A	19186598	-24	expected	3	1	no	no	yes	0,3,(0)	0,1,(0)	0,0,(0)	0,0,(0)	SRR545715(3;1),
chr11	20129186	+	canonical	TGCTA(A*)T	A	20129209	-23	expected	1	1	no	no	yes	1,0,(0)	1,0,(0)	0,0,(0)	0,0,(0)	SRR317063(1;1),
chr11	32616438	+	canonical	AGCTT(A*)C	A	32616459	-21	expected	3	2	yes	yes	yes	0,1,(2)	0,1,(1)	0,0,(2)	0,0,(1)	SRR317044(1;1),SRR534334(2;1),
chr11	32617481	+	canonical	TATTG(A*)T	A	32617511	-30	expected	9	2	no	yes	yes	0,9,(0)	0,2,(0)	0,0,(0)	0,0,(0)	SRR534327(3;1),SRR545685(6;1),
chr11	32622208	+	canonical	CACTC(A*)T	A	32622234	-26	expected	1	1	no	no	yes	0,0,(1)	0,0,(1)	0,0,(0)	0,0,(0)	SRR317050(1;1),
chr11	33065263	+	canonical	TACTT(T*)T	T	33065295	-32	expected	1	1	no	no	yes	0,0,(1)	0,0,(1)	0,0,(0)	0,0,(0)	SRR534312(1;1),
chr11	33369134	+	canonical	TACTT(A*)T	A	33369174	-40	expected	1	1	yes	no	yes	0,0,(1)	0,0,(1)	0,0,(1)	0,0,(1)	SRR317043(1;1),
chr11	34112074	+	canonical	TGTTT(A*)G	A	34112075	-1	proximal	2	1	no	no	yes	0,2,(0)	0,1,(0)	0,0,(0)	0,0,(0)	SRR317063(2;1),
chr11	34118000	+	canonical	TGTAT(A*)T	A	34118025	-25	expected	2	1	no	no	yes	0,2,(0)	0,1,(0)	0,0,(0)	0,0,(0)	SRR317050(2;1),
chr11	34119228	+	canonical	TACTA(A*)C	A	34119244	-16	expected	1	1	no	no	yes	0,1,(0)	0,1,(0)	0,0,(0)	0,0,(0)	SRR545720(1;1),
chr11	34135246	+	canonical	TTCTA(A*)C	A	34135262	-16	expected	2	2	yes	yes	yes	1,0,(1)	1,0,(1)	0,0,(1)	0,0,(1)	SRR317062(1;1),SRR307913(1;1),
chr11	34152882	+	canonical	TACAT(A*)T	A	34152927	-45	expected	2	1	yes	no	yes	2,0,(0)	1,0,(0)	2,0,(0)	1,0,(0)	SRR534317(2;1),
chr11	35243172	+	canonical	AGCTC(A*)C	A	35243200	-28	expected	12	6	yes	yes	yes	0,1,(11)	0,1,(5)	0,0,(9)	0,0,(4)	SRR534289(1;1),SRR534317(1;1),SRR545713(2;1),SRR545701(4;1),SRR545720(2;1),SRR545694(2;1),
chr11	43422965	+	canonical	TGCTC(A*)T	A	43422995	-30	expected	3	2	yes	yes	yes	0,0,(3)	0,0,(2)	0,0,(3)	0,0,(2)	SRR317043(2;1),SRR317042(1;1),
chr11	45203759	+	canonical	TGATG(A*)C	A	45203796	-37	expected	3	2	no	no	yes	3,0,(0)	2,0,(0)	0,0,(0)	0,0,(0)	SRR545708(3;2),
chr11	46387768	+	canonical	TCCTG(A*)T	A	46387793	-25	expected	1	1	no	no	yes	1,0,(0)	1,0,(0)	0,0,(0)	0,0,(0)	SRR307921(1;1),
chr11	46404997	+	canonical	TATTA(A*)T	A	46405018	-21	expected	3	3	yes	yes	yes	1,2,(0)	1,2,(0)	1,0,(0)	1,0,(0)	SRR315310(1;1),SRR545692(1;1),SRR317044(1;1),
chr11	46671705	+	canonical	TGCTG(A*)C	A	46671726	-21	expected	1	1	no	no	yes	1,0,(0)	1,0,(0)	0,0,(0)	0,0,(0)	SRR545707(1;1),
chr11	47297419	+	canonical	TGCTA(A*)T	A	47297449	-30	expected	3	2	no	yes	yes	3,0,(0)	2,0,(0)	0,0,(0)	0,0,(0)	SRR545690(1;1),SRR317043(2;1),
chr11	47299694	+	canonical	TTCTC(A*)C	A	47299715	-21	expected	2	2	yes	yes	yes	0,0,(2)	0,0,(2)	0,0,(2)	0,0,(2)	SRR317054(1;1),SRR317036(1;1),
chr11	47304335	+	canonical	TGCTG(A*)C	A	47304363	-28	expected	22	15	yes	yes	yes	21,0,(1)	14,0,(1)	0,0,(1)	0,0,(1)	SRR317051(3;1),SRR317050(4;2),SRR317043(3;3),SRR317063(2;1),SRR317047(1;1),SRR317049(1;1),SRR317062(2;1),SRR317042(3;2),SRR317054(2;2),SRR315305(1;1),
chr11	48164447	+	canonical	TGATC(A*)T	A	48164470	-23	expected	1	1	yes	no	yes	0,0,(1)	0,0,(1)	0,0,(1)	0,0,(1)	SRR317063(1;1),
chr11	57575601	+	canonical	TACTG(A*)T	A	57575636	-35	expected	1	1	no	no	yes	0,0,(1)	0,0,(1)	0,0,(0)	0,0,(0)	SRR545694(1;1),
chr11	61106516	+	canonical	TGCTC(A*)C	A	61106537	-21	expected	1	1	yes	no	yes	0,0,(1)	0,0,(1)	0,0,(1)	0,0,(1)	SRR545694(1;1),
chr11	61488130	+	canonical	TGCTC(A*)C	A	61488150	-20	expected	5	3	yes	yes	yes	0,3,(2)	0,2,(1)	0,0,(2)	0,0,(1)	SRR317048(3;2),SRR317056(2;1),
chr11	61553249	+	canonical	TCCTG(A*)C	A	61553271	-22	expected	1	1	no	no	yes	1,0,(0)	1,0,(0)	0,0,(0)	0,0,(0)	SRR534317(1;1),
chr11	61632595	+	canonical	TCCTC(A*)C	A	61632623	-28	expected	1	1	yes	no	yes	0,0,(1)	0,0,(1)	0,0,(1)	0,0,(1)	SRR317035(1;1),
chr11	61915925	+	canonical	TCCTA(A*)C	A	61915947	-22	expected	1	1	yes	no	yes	0,0,(1)	0,0,(1)	0,0,(1)	0,0,(1)	SRR545704(1;1),
chr11	62557333	+	canonical	TCCTG(A*)C	A	62557357	-24	expected	1	1	no	no	yes	1,0,(0)	1,0,(0)	0,0,(0)	0,0,(0)	SRR317044(1;1),
chr11	62651897	+	canonical	AACTG(A*)T	A	62651928	-31	expected	6	4	no	yes	yes	6,0,(0)	4,0,(0)	0,0,(0)	0,0,(0)	SRR317042(1;1),SRR545704(1;1),SRR317044(1;1),SRR545720(3;1),
chr11	63670504	+	canonical	TTCTG(A*)T	A	63670532	-28	expected	2	1	yes	no	yes	0,0,(2)	0,0,(1)	0,0,(2)	0,0,(1)	SRR317049(2;1),
chr11	63720205	+	canonical	CGCTC(A*)C	A	63720227	-22	expected	3	3	yes	yes	yes	0,0,(3)	0,0,(3)	0,0,(1)	0,0,(1)	SRR317063(1;1),SRR317042(1;1),SRR317049(1;1),
chr11	63743662	+	canonical	TACTG(A*)C	A	63743696	-34	expected	2	2	yes	yes	yes	1,0,(1)	1,0,(1)	0,0,(1)	0,0,(1)	SRR315306(1;1),SRR315311(1;1),
chr11	63964724	+	canonical	CACTC(A*)C	A	63964742	-18	expected	4	2	yes	yes	yes	0,0,(4)	0,0,(2)	0,0,(4)	0,0,(2)	SRR315310(1;1),SRR317050(3;1),
chr11	63970889	+	canonical	TCCTA(A*)C	A	63970921	-32	expected	3	3	yes	yes	yes	0,0,(3)	0,0,(3)	0,0,(3)	0,0,(3)	SRR307914(1;1),SRR317065(1;1),SRR317043(1;1),
chr11	63974795	+	canonical	TGCCC(A*)C	A	63974822	-27	expected	1	1	yes	no	yes	0,0,(1)	0,0,(1)	0,0,(1)	0,0,(1)	SRR545717(1;1),
chr11	64022676	+	canonical	CACTC(A*)C	A	64022705	-29	expected	3	1	yes	no	yes	0,0,(3)	0,0,(1)	0,0,(3)	0,0,(1)	SRR315318(3;1),
chr11	64854378	+	canonical	TGCTG(A*)C	A	64854399	-21	expected	1	1	no	no	yes	1,0,(0)	1,0,(0)	0,0,(0)	0,0,(0)	SRR317038(1;1),
chr11	64877146	+	canonical	TACCC(A*)C	A	64877176	-30	expected	2	1	yes	no	yes	0,0,(2)	0,0,(1)	0,0,(2)	0,0,(1)	SRR317049(2;1),
chr11	64891943	+	canonical	GGCTA(A*)T	A	64891973	-30	expected	22	2	no	no	yes	0,22,(0)	0,2,(0)	0,0,(0)	0,0,(0)	SRR545712(22;2),
chr11	64955881	+	canonical	TCCTC(A*)C	A	64955884	-3	proximal	5	2	no	no	yes	5,0,(0)	2,0,(0)	0,0,(0)	0,0,(0)	SRR317057(5;2),
chr11	65034929	+	canonical	TATTC(A*)C	A	65034947	-18	expected	7	1	no	no	yes	0,0,(7)	0,0,(1)	0,0,(0)	0,0,(0)	SRR545712(7;1),
chr11	65300140	+	canonical	TGTTG(A*)C	A	65300162	-22	expected	6	2	yes	yes	yes	0,0,(6)	0,0,(2)	0,0,(6)	0,0,(2)	SRR545711(5;1),SRR317042(1;1),
chr11	65304032	+	canonical	TACCC(A*)C	A	65304056	-24	expected	1	1	yes	no	yes	0,1,(0)	0,1,(0)	0,1,(0)	0,1,(0)	SRR315306(1;1),
chr11	65347387	+	canonical	TACTC(A*)C	A	65347406	-19	expected	1	1	yes	no	yes	0,0,(1)	0,0,(1)	0,0,(1)	0,0,(1)	SRR315311(1;1),
chr11	65388283	+	canonical	TCCTG(A*)T	A	65388301	-18	expected	1	1	yes	no	yes	0,0,(1)	0,0,(1)	0,0,(1)	0,0,(1)	SRR534289(1;1),
chr11	65632578	+	canonical	TCCTC(A*)C	A	65632690	-112	distal	2	2	yes	yes	yes	0,0,(2)	0,0,(2)	0,0,(1)	0,0,(1)	SRR307921(1;1),SRR315317(1;1),
chr11	65825763	+	canonical	GACTC(A*)T	A	65825784	-21	expected	1	1	yes	no	yes	0,0,(1)	0,0,(1)	0,0,(1)	0,0,(1)	SRR317052(1;1),
chr11	66030371	+	canonical	TGGTG(A*)T	A	66031130	-759	distal	2	1	yes	no	yes	0,0,(2)	0,0,(1)	0,0,(2)	0,0,(1)	SRR545715(2;1),
chr11	66612313	+	canonical	CACTC(A*)C	A	66612339	-26	expected	7	5	yes	yes	yes	0,2,(5)	0,1,(4)	0,0,(4)	0,0,(3)	SRR317064(1;1),SRR545685(1;1),SRR545694(2;1),SRR307921(1;1),SRR315318(2;1),
chr11	67050578	+	canonical	TGCTA(A*)T	A	67050598	-20	expected	3	3	yes	yes	yes	0,1,(2)	0,1,(2)	0,0,(2)	0,0,(2)	SRR317036(1;1),SRR317049(2;2),
chr11	67376885	+	canonical	TCCTG(A*)T	A	67376922	-37	expected	1	1	no	no	yes	1,0,(0)	1,0,(0)	0,0,(0)	0,0,(0)	SRR534317(1;1),
chr11	67809197	+	canonical	CACTC(A*)C	A	67809219	-22	expected	3	3	yes	yes	yes	0,0,(3)	0,0,(3)	0,0,(3)	0,0,(3)	SRR534333(1;1),SRR545694(1;1),SRR317063(1;1),
chr11	67814882	+	canonical	AGCTC(A*)C	A	67814899	-17	expected	4	1	yes	no	yes	0,0,(4)	0,0,(1)	0,0,(4)	0,0,(1)	SRR534318(4;1),
chr11	68369304	+	canonical	TGCTA(A*)T	A	68369330	-26	expected	11	6	yes	yes	yes	6,1,(4)	3,1,(2)	0,1,(4)	0,1,(2)	SRR545712(3;1),SRR317062(3;1),SRR317051(3;2),SRR317063(1;1),SRR317042(1;1),
chr11	68377329	+	canonical	TGCTG(G*)T	G	68377371	-42	expected	1	1	no	no	yes	0,1,(0)	0,1,(0)	0,0,(0)	0,0,(0)	SRR307914(1;1),
chr11	68825025	+	canonical	TGCTC(A*)C	A	68825045	-20	expected	2	2	no	yes	yes	0,2,(0)	0,2,(0)	0,0,(0)	0,0,(0)	SRR545718(1;1),SRR545717(1;1),
chr11	69462730	+	canonical	TGCTC(A*)C	A	69462761	-31	expected	4	1	no	no	yes	0,0,(4)	0,0,(1)	0,0,(0)	0,0,(0)	SRR545694(4;1),
chr11	70172346	+	canonical	CACTC(A*)T	A	70172367	-21	expected	3	2	yes	yes	yes	0,0,(3)	0,0,(2)	0,0,(3)	0,0,(2)	SRR545719(2;1),SRR317043(1;1),
chr11	70202233	+	canonical	TGCTG(A*)T	A	70202266	-33	expected	2	2	yes	yes	yes	0,1,(1)	0,1,(1)	0,0,(1)	0,0,(1)	SRR545691(1;1),SRR317063(1;1),
chr11	71185410	+	canonical	AGCTG(A*)C	A	71185440	-30	expected	4	1	no	no	yes	4,0,(0)	1,0,(0)	0,0,(0)	0,0,(0)	SRR545694(4;1),
chr11	71192944	+	canonical	TGCTC(A*)C	A	71192968	-24	expected	4	1	yes	no	yes	0,0,(4)	0,0,(1)	0,0,(4)	0,0,(1)	SRR545718(4;1),
chr11	73075199	+	canonical	TGCTT(C*)C	C	73075216	-17	expected	1	1	no	no	yes	0,0,(1)	0,0,(1)	0,0,(0)	0,0,(0)	SRR545693(1;1),
chr11	73078605	+	canonical	AGCTG(A*)C	A	73078628	-23	expected	6	4	no	yes	yes	6,0,(0)	4,0,(0)	0,0,(0)	0,0,(0)	SRR317065(3;1),SRR534325(1;1),SRR317059(1;1),SRR317064(1;1),
chr11	73357804	+	canonical	TGCTG(G*)T	G	73360056	-2252	distal	1	1	no	no	yes	0,1,(0)	0,1,(0)	0,0,(0)	0,0,(0)	SRR317047(1;1),
chr11	73941935	+	canonical	TGGTT(A*)C	A	73941956	-21	expected	2	2	no	no	yes	2,0,(0)	2,0,(0)	0,0,(0)	0,0,(0)	SRR307914(2;2),
chr11	75115696	+	canonical	TGCTA(A*)C	A	75115715	-19	expected	4	2	no	yes	yes	4,0,(0)	2,0,(0)	0,0,(0)	0,0,(0)	SRR534311(1;1),SRR545719(3;1),
chr11	76255270	+	canonical	TTCTT(A*)T	A	76255302	-32	expected	3	1	yes	no	yes	0,0,(3)	0,0,(1)	0,0,(3)	0,0,(1)	SRR545717(3;1),
chr11	77583196	+	canonical	TACTT(A*)C	A	77583220	-24	expected	1	1	no	no	yes	0,1,(0)	0,1,(0)	0,0,(0)	0,0,(0)	SRR317043(1;1),
chr11	77916855	+	canonical	TGCCC(A*)C	A	77916887	-32	expected	2	2	yes	yes	yes	0,2,(0)	0,2,(0)	0,2,(0)	0,2,(0)	SRR545703(1;1),SRR315317(1;1),
chr11	82893414	+	canonical	TGTAA(A*)T	A	82893440	-26	expected	2	1	yes	no	yes	0,2,(0)	0,1,(0)	0,2,(0)	0,1,(0)	SRR545707(2;1),
chr11	82894058	+	canonical	TATTT(A*)C	A	82894079	-21	expected	9	7	yes	yes	yes	0,0,(9)	0,0,(7)	0,0,(9)	0,0,(7)	SRR534333(1;1),SRR545693(1;1),SRR534318(2;2),SRR545709(1;1),SRR534334(3;1),SRR317050(1;1),
chr11	82917082	+	canonical	TGTTA(A*)C	A	82917099	-17	expected	2	1	yes	no	yes	0,0,(2)	0,0,(1)	0,0,(2)	0,0,(1)	SRR317062(2;1),
chr11	85988929	+	canonical	TATTA(A*)T	A	85988959	-30	expected	1	1	yes	no	yes	0,0,(1)	0,0,(1)	0,0,(1)	0,0,(1)	SRR545716(1;1),
chr11	93542851	+	canonical	TGCTG(A*)C	A	93542882	-31	expected	1	1	no	no	yes	1,0,(0)	1,0,(0)	0,0,(0)	0,0,(0)	SRR545701(1;1),
chr11	94229745	+	canonical	TACTA(A*)T	A	94229769	-24	expected	1	1	yes	no	yes	0,0,(1)	0,0,(1)	0,0,(1)	0,0,(1)	SRR317042(1;1),
chr11	102993530	+	canonical	TGCAC(A*)T	A	102993553	-23	expected	1	1	yes	no	yes	1,0,(0)	1,0,(0)	1,0,(0)	1,0,(0)	SRR545692(1;1),
chr11	105950169	+	canonical	TACAT(A*)C	A	105950193	-24	expected	6	2	no	yes	yes	6,0,(0)	2,0,(0)	0,0,(0)	0,0,(0)	SRR534335(5;1),SRR545716(1;1),
chr11	108173554	+	canonical	TATTT(A*)C	A	108173579	-25	expected	3	2	yes	no	yes	0,0,(3)	0,0,(2)	0,0,(3)	0,0,(2)	SRR545704(3;2),
chr11	108203460	+	canonical	TCCTT(A*)T	A	108203488	-28	expected	3	2	yes	yes	yes	0,0,(3)	0,0,(2)	0,0,(3)	0,0,(2)	SRR545702(2;1),SRR315311(1;1),
chr11	108206549	+	canonical	TGTTT(A*)T	A	108206571	-22	expected	1	1	yes	no	yes	0,0,(1)	0,0,(1)	0,0,(1)	0,0,(1)	SRR545692(1;1),
chr11	108577442	+	canonical	TGTTA(A*)A	A	108577465	-23	expected	1	1	no	no	yes	0,1,(0)	0,1,(0)	0,0,(0)	0,0,(0)	SRR545687(1;1),
chr11	117074472	+	canonical	TGTTC(A*)T	A	117074497	-25	expected	5	5	yes	yes	yes	0,0,(5)	0,0,(5)	0,0,(4)	0,0,(4)	SRR545720(1;1),SRR317063(1;1),SRR545693(1;1),SRR545719(2;2),
chr11	117262919	+	canonical	CACTC(A*)C	A	117262941	-22	expected	2	1	yes	no	yes	0,0,(2)	0,0,(1)	0,0,(2)	0,0,(1)	SRR545719(2;1),
chr11	117265614	+	canonical	TGCTT(A*)T	A	117265635	-21	expected	4	1	no	no	yes	0,4,(0)	0,1,(0)	0,0,(0)	0,0,(0)	SRR317062(4;1),
chr11	118365384	+	canonical	TATTT(A*)C	A	118365408	-24	expected	1	1	no	no	yes	1,0,(0)	1,0,(0)	0,0,(0)	0,0,(0)	SRR545705(1;1),
chr11	118371678	+	canonical	TGATG(A*)T	A	118371701	-23	expected	1	1	no	no	yes	1,0,(0)	1,0,(0)	0,0,(0)	0,0,(0)	SRR317055(1;1),
chr11	118382641	+	canonical	GGCTT(A*)C	A	118382665	-24	expected	2	2	yes	yes	yes	0,0,(2)	0,0,(2)	0,0,(1)	0,0,(1)	SRR545720(1;1),SRR534289(1;1),
chr11	118451938	+	canonical	TACTT(A*)C	A	118451960	-22	expected	1	1	no	no	yes	0,0,(1)	0,0,(1)	0,0,(0)	0,0,(0)	SRR545705(1;1),
chr11	118963448	+	canonical	AGCTC(A*)C	A	118963467	-19	expected	2	2	no	yes	yes	0,0,(2)	0,0,(2)	0,0,(0)	0,0,(0)	SRR317042(1;1),SRR307930(1;1),
chr11	119002222	+	canonical	TCCTC(A*)C	A	119002244	-22	expected	3	3	yes	yes	yes	0,0,(3)	0,0,(3)	0,0,(2)	0,0,(2)	SRR317067(1;1),SRR545706(2;2),
chr11	119170180	+	canonical	TGCAA(A*)T	A	119170204	-24	expected	2	1	yes	no	yes	0,0,(2)	0,0,(1)	0,0,(2)	0,0,(1)	SRR545691(2;1),
chr11	120312392	+	canonical	TACTG(A*)T	A	120312415	-23	expected	2	2	yes	yes	yes	1,0,(1)	1,0,(1)	0,0,(1)	0,0,(1)	SRR545704(1;1),SRR545717(1;1),
chr11	121481745	+	canonical	TTTTC(A*)T	A	121481784	-39	expected	1	1	yes	no	yes	0,0,(1)	0,0,(1)	0,0,(1)	0,0,(1)	SRR307921(1;1),
chr11	122666839	+	canonical	TCTTC(A*)C	A	122666863	-24	expected	2	1	no	no	yes	0,0,(2)	0,0,(1)	0,0,(0)	0,0,(0)	SRR307914(2;1),
chr11	123471151	+	canonical	TATTT(A*)T	A	123471175	-24	expected	1	1	yes	no	yes	0,0,(1)	0,0,(1)	0,0,(1)	0,0,(1)	SRR317051(1;1),
chr11	123480477	+	canonical	TCCTC(A*)T	A	123480502	-25	expected	4	2	yes	yes	yes	0,0,(4)	0,0,(2)	0,0,(2)	0,0,(1)	SRR307914(2;1),SRR317049(2;1),
chr11	123485428	+	canonical	TGGTG(A*)T	A	123485452	-24	expected	26	15	yes	yes	yes	8,1,(17)	4,1,(10)	0,0,(17)	0,0,(10)	SRR317063(1;1),SRR307921(1;1),SRR317050(3;3),SRR545687(2;1),SRR545688(1;1),SRR545702(4;2),SRR317062(7;3),SRR317068(1;1),SRR317049(6;2),
chr11	123989652	+	canonical	TTCTA(A*)T	A	123989681	-29	expected	2	1	yes	no	yes	0,0,(2)	0,0,(1)	0,0,(2)	0,0,(1)	SRR317051(2;1),
chr11	125301042	+	canonical	TCCTG(A*)C	A	125301061	-19	expected	1	1	no	no	yes	1,0,(0)	1,0,(0)	0,0,(0)	0,0,(0)	SRR315318(1;1),
chr11	125477980	+	canonical	TATTA(A*)C	A	125478003	-23	expected	8	3	yes	yes	yes	0,5,(3)	0,2,(1)	0,0,(3)	0,0,(1)	SRR317068(1;1),SRR545713(4;1),SRR545685(3;1),
chr11	125481300	+	canonical	TGCTT(A*)T	A	125481322	-22	expected	3	1	no	no	yes	3,0,(0)	1,0,(0)	0,0,(0)	0,0,(0)	SRR545713(3;1),
chr11	129992170	+	canonical	TATTA(A*)C	A	129992199	-29	expected	3	1	yes	no	yes	0,0,(3)	0,0,(1)	0,0,(3)	0,0,(1)	SRR545706(3;1),
chr11	130007558	+	canonical	TATTT(A*)C	A	130010292	-2734	distal	2	1	no	no	yes	0,2,(0)	0,1,(0)	0,0,(0)	0,0,(0)	SRR317039(2;1),
chr11	134114811	+	canonical	TGCTG(A*)C	A	134114831	-20	expected	2	2	no	yes	yes	2,0,(0)	2,0,(0)	0,0,(0)	0,0,(0)	SRR317045(1;1),SRR317062(1;1),
chr12	416278	-	canonical	TGTTC(A*)T	A	416255	-23	expected	1	1	yes	no	yes	0,0,(1)	0,0,(1)	0,0,(1)	0,0,(1)	SRR315311(1;1),
chr12	441152	-	canonical	TGTTT(G*)T	G	441104	-48	expected	6	1	no	no	yes	0,6,(0)	0,1,(0)	0,0,(0)	0,0,(0)	SRR545690(6;1),
chr12	1023314	-	canonical	TGCTG(A*)T	A	1023287	-27	expected	1	1	no	no	yes	1,0,(0)	1,0,(0)	0,0,(0)	0,0,(0)	SRR317040(1;1),
chr12	2973954	-	canonical	TGTTA(A*)C	A	2973921	-33	expected	1	1	yes	no	yes	0,0,(1)	0,0,(1)	0,0,(1)	0,0,(1)	SRR545713(1;1),
chr12	6440114	-	canonical	TGTTC(A*)C	A	6440092	-22	expected	2	2	yes	yes	yes	0,0,(2)	0,0,(2)	0,0,(2)	0,0,(2)	SRR307914(1;1),SRR317038(1;1),
chr12	6710954	-	canonical	TACTT(A*)C	A	6710932	-22	expected	7	6	yes	yes	yes	0,0,(7)	0,0,(6)	0,0,(6)	0,0,(5)	SRR317044(1;1),SRR317043(2;1),SRR315311(2;2),SRR534317(1;1),SRR545708(1;1),
chr12	6778380	-	canonical	TATTC(A*)T	A	6778355	-25	expected	1	1	yes	no	yes	0,0,(1)	0,0,(1)	0,0,(1)	0,0,(1)	SRR317045(1;1),
chr12	6780037	-	canonical	TGCTG(A*)C	A	6780004	-33	expected	1	1	no	no	yes	1,0,(0)	1,0,(0)	0,0,(0)	0,0,(0)	SRR317043(1;1),
chr12	6958379	-	canonical	AACTC(A*)T	A	6958362	-17	expected	1	1	no	no	yes	0,0,(1)	0,0,(1)	0,0,(0)	0,0,(0)	SRR545701(1;1),
chr12	7077770	-	canonical	TGCTG(A*)C	A	7077758	-12	expected	3	2	no	yes	yes	3,0,(0)	2,0,(0)	0,0,(0)	0,0,(0)	SRR317042(2;1),SRR307924(1;1),
chr12	8803209	-	canonical	TCCTT(A*)T	A	8803185	-24	expected	7	2	yes	yes	yes	0,2,(5)	0,1,(1)	0,0,(5)	0,0,(1)	SRR545685(5;1),SRR317065(2;1),
chr12	9220853	-	canonical	TAATG(A*)T	A	9220820	-33	expected	1	1	no	no	yes	1,0,(0)	1,0,(0)	0,0,(0)	0,0,(0)	SRR317054(1;1),
chr12	9241873	-	canonical	TTCTC(A*)C	A	9241847	-26	expected	1	1	yes	no	yes	0,0,(1)	0,0,(1)	0,0,(1)	0,0,(1)	SRR317055(1;1),
chr12	9572202	-	canonical	TCCTG(A*)C	A	9572169	-33	expected	1	1	no	no	yes	1,0,(0)	1,0,(0)	0,0,(0)	0,0,(0)	SRR317067(1;1),
chr12	10530858	-	canonical	TACTT(A*)T	A	10530834	-24	expected	1	1	yes	no	yes	0,0,(1)	0,0,(1)	0,0,(1)	0,0,(1)	SRR317050(1;1),
chr12	10749604	-	canonical	TGATT(A*)T	A	10749580	-24	expected	1	1	yes	no	yes	0,0,(1)	0,0,(1)	0,0,(1)	0,0,(1)	SRR534327(1;1),
chr12	10765597	-	canonical	TGTTT(A*)C	A	10763279	-2318	distal	1	1	no	no	yes	0,0,(1)	0,0,(1)	0,0,(0)	0,0,(0)	SRR545692(1;1),
chr12	21795084	-	canonical	TACTT(A*)C	A	21795059	-25	expected	9	6	yes	yes	yes	0,7,(2)	0,4,(2)	0,0,(2)	0,0,(2)	SRR307921(2;1),SRR317050(1;1),SRR317039(1;1),SRR317049(1;1),SRR315309(1;1),SRR545717(3;1),
chr12	26812237	-	canonical	TTCTG(A*)C	A	26812218	-19	expected	1	1	yes	no	yes	0,1,(0)	0,1,(0)	0,1,(0)	0,1,(0)	SRR545718(1;1),
chr12	26816811	-	canonical	TATTC(A*)T	A	26816779	-32	expected	1	1	yes	no	yes	0,0,(1)	0,0,(1)	0,0,(1)	0,0,(1)	SRR545687(1;1),
chr12	26943186	-	canonical	TGTTA(A*)C	A	26943160	-26	expected	3	1	yes	no	yes	0,0,(3)	0,0,(1)	0,0,(3)	0,0,(1)	SRR545688(3;1),
chr12	27129316	-	canonical	TGTTT(A*)C	A	27129290	-26	expected	1	1	yes	no	yes	0,0,(1)	0,0,(1)	0,0,(1)	0,0,(1)	SRR307921(1;1),
chr12	29519879	-	canonical	TGCAG(A*)T	A	29514618	-5261	distal	1	1	no	no	yes	1,0,(0)	1,0,(0)	0,0,(0)	0,0,(0)	SRR534311(1;1),
chr12	29521242	-	canonical	TACTA(A*)T	A	29521220	-22	expected	1	1	no	no	yes	1,0,(0)	1,0,(0)	0,0,(0)	0,0,(0)	SRR545690(1;1),
chr12	29642726	-	canonical	TGCTA(A*)C	A	29642704	-22	expected	1	1	no	no	yes	1,0,(0)	1,0,(0)	0,0,(0)	0,0,(0)	SRR545709(1;1),
chr12	31577671	-	canonical	TGTTG(G*)T	G	31577621	-50	expected	2	1	no	no	yes	0,2,(0)	0,1,(0)	0,0,(0)	0,0,(0)	SRR545715(2;1),
chr12	39156042	-	canonical	TGCAA(A*)T	A	39156018	-24	expected	1	1	yes	no	yes	0,1,(0)	0,1,(0)	0,1,(0)	0,1,(0)	SRR315321(1;1),
chr12	46596896	-	canonical	TCCTA(A*)T	A	46596872	-24	expected	8	3	yes	yes	yes	4,4,(0)	2,1,(0)	0,4,(0)	0,1,(0)	SRR545689(1;1),SRR545690(7;2),
chr12	46755017	-	canonical	TGCTG(A*)T	A	46754992	-25	expected	56	24	yes	yes	yes	50,0,(6)	20,0,(4)	0,0,(6)	0,0,(4)	SRR545704(4;2),SRR545712(6;1),SRR534335(4;2),SRR545707(1;1),SRR545718(5;2),SRR545693(3;1),SRR545691(1;1),SRR545703(3;2),SRR317042(2;2),SRR317054(1;1),SRR317051(2;1),SRR545709(1;1),SRR317040(1;1),SRR545685(3;1),SRR534326(1;1),SRR545711(15;1),SRR545720(1;1),SRR317050(2;2),
chr12	46758507	-	canonical	TACTG(A*)T	A	46758485	-22	expected	14	8	yes	yes	yes	6,1,(7)	5,1,(2)	0,0,(5)	0,0,(1)	SRR545720(2;2),SRR545694(2;1),SRR545704(2;1),SRR545717(1;1),SRR534335(1;1),SRR545719(1;1),SRR534318(5;1),
chr12	46764429	-	canonical	TGGTT(A*)T	A	46764410	-19	expected	2	1	no	no	yes	0,2,(0)	0,1,(0)	0,0,(0)	0,0,(0)	SRR534335(2;1),
chr12	46764658	-	canonical	TATAT(A*)T	A	46764640	-18	expected	2	2	yes	yes	yes	2,0,(0)	2,0,(0)	1,0,(0)	1,0,(0)	SRR534326(1;1),SRR545707(1;1),
chr12	48179271	-	canonical	GGCTG(A*)T	A	48179254	-17	expected	4	3	no	yes	yes	4,0,(0)	3,0,(0)	0,0,(0)	0,0,(0)	SRR317043(2;1),SRR317042(1;1),SRR317047(1;1),
chr12	49172066	-	canonical	TGGTC(A*)C	A	49172040	-26	expected	9	1	yes	no	yes	0,0,(9)	0,0,(1)	0,0,(9)	0,0,(1)	SRR545685(9;1),
chr12	49317777	-	canonical	TGCTG(G*)C	G	49317635	-142	distal	1	1	no	no	yes	0,1,(0)	0,1,(0)	0,0,(0)	0,0,(0)	SRR317063(1;1),
chr12	49448835	-	canonical	GGCTG(A*)C	A	49448809	-26	expected	2	1	no	no	yes	2,0,(0)	1,0,(0)	0,0,(0)	0,0,(0)	SRR545709(2;1),
chr12	50040822	-	canonical	TGATG(A*)C	A	50040792	-30	expected	1	1	no	no	yes	1,0,(0)	1,0,(0)	0,0,(0)	0,0,(0)	SRR307921(1;1),
chr12	50195785	-	canonical	TCCTC(A*)C	A	50195750	-35	expected	1	1	yes	no	yes	0,0,(1)	0,0,(1)	0,0,(1)	0,0,(1)	SRR307914(1;1),
chr12	50196809	-	canonical	AGCTG(A*)T	A	50196779	-30	expected	6	5	yes	yes	yes	2,0,(4)	1,0,(4)	0,0,(4)	0,0,(4)	SRR317045(1;1),SRR317044(2;1),SRR545718(1;1),SRR317065(2;2),
chr12	50399203	-	canonical	TAGTT(A*)T	A	50399175	-28	expected	3	1	no	no	yes	3,0,(0)	1,0,(0)	0,0,(0)	0,0,(0)	SRR317044(3;1),
chr12	52909643	-	canonical	TGTTA(A*)C	A	52909616	-27	expected	5	2	yes	yes	yes	0,0,(5)	0,0,(2)	0,0,(5)	0,0,(2)	SRR317047(2;1),SRR315321(3;1),
chr12	52911047	-	canonical	TATAA(A*)C	A	52911016	-31	expected	1	1	yes	no	yes	0,1,(0)	0,1,(0)	0,1,(0)	0,1,(0)	SRR317047(1;1),
chr12	52911053	-	canonical	TTCTC(A*)T	A	52911016	-37	expected	15	2	yes	yes	yes	0,0,(15)	0,0,(2)	0,0,(15)	0,0,(2)	SRR545685(10;1),SRR545711(5;1),
chr12	53291427	-	canonical	TACTC(A*)T	A	53291402	-25	expected	3	2	yes	no	yes	0,0,(3)	0,0,(2)	0,0,(1)	0,0,(1)	SRR317063(3;2),
chr12	53292325	-	canonical	TCCTG(A*)C	A	53292303	-22	expected	5	4	yes	yes	yes	2,1,(2)	1,1,(2)	0,0,(2)	0,0,(2)	SRR317063(4;3),SRR317062(1;1),
chr12	53469028	-	canonical	TGCTG(A*)C	A	53469003	-25	expected	1	1	yes	no	yes	0,0,(1)	0,0,(1)	0,0,(1)	0,0,(1)	SRR317063(1;1),
chr12	53564310	-	canonical	TGCTA(A*)C	A	53564286	-24	expected	4	2	no	yes	yes	2,2,(0)	1,1,(0)	0,0,(0)	0,0,(0)	SRR307913(2;1),SRR545702(2;1),
chr12	54798703	-	canonical	TGCTG(A*)C	A	54798678	-25	expected	4	1	no	no	yes	4,0,(0)	1,0,(0)	0,0,(0)	0,0,(0)	SRR545708(4;1),
chr12	54854280	-	canonical	TGCCG(A*)C	A	54854255	-25	expected	1	1	no	no	yes	0,0,(1)	0,0,(1)	0,0,(0)	0,0,(0)	SRR317042(1;1),
chr12	55357049	-	canonical	GACTT(A*)C	A	55357026	-23	expected	4	1	yes	no	yes	0,0,(4)	0,0,(1)	0,0,(4)	0,0,(1)	SRR545690(4;1),
chr12	56217772	-	canonical	TGATG(G*)C	G	56217292	-480	distal	1	1	no	no	yes	0,1,(0)	0,1,(0)	0,0,(0)	0,0,(0)	SRR545704(1;1),
chr12	56577744	-	canonical	AGCTT(A*)T	A	56577714	-30	expected	1	1	yes	no	yes	0,0,(1)	0,0,(1)	0,0,(1)	0,0,(1)	SRR317042(1;1),
chr12	56578918	-	canonical	CACTC(A*)C	A	56578895	-23	expected	1	1	yes	no	yes	0,0,(1)	0,0,(1)	0,0,(1)	0,0,(1)	SRR315312(1;1),
chr12	56670020	-	canonical	TGCTG(A*)T	A	56669979	-41	expected	2	2	yes	yes	yes	1,0,(1)	1,0,(1)	0,0,(1)	0,0,(1)	SRR307931(1;1),SRR315309(1;1),
chr12	56993165	-	canonical	TGCTA(A*)T	A	56993142	-23	expected	1	1	no	no	yes	0,0,(1)	0,0,(1)	0,0,(0)	0,0,(0)	SRR317045(1;1),
chr12	56996669	-	canonical	TGTTT(A*)T	A	56996641	-28	expected	2	1	yes	no	yes	0,0,(2)	0,0,(1)	0,0,(2)	0,0,(1)	SRR317054(2;1),
chr12	57032237	-	canonical	TTCTT(A*)C	A	57032207	-30	expected	8	6	yes	yes	yes	0,0,(8)	0,0,(6)	0,0,(8)	0,0,(6)	SRR317062(3;1),SRR317055(1;1),SRR317044(1;1),SRR317043(1;1),SRR534317(1;1),SRR307922(1;1),
chr12	57037741	-	canonical	TACAG(A*)T	A	57037371	-370	distal	9	1	no	no	yes	9,0,(0)	1,0,(0)	0,0,(0)	0,0,(0)	SRR545715(9;1),
chr12	57107001	-	canonical	TACTC(A*)C	A	57106974	-27	expected	5	1	no	no	yes	0,0,(5)	0,0,(1)	0,0,(0)	0,0,(0)	SRR545686(5;1),
chr12	57458545	-	canonical	TGGTC(A*)T	A	57458522	-23	expected	1	1	yes	no	yes	0,0,(1)	0,0,(1)	0,0,(1)	0,0,(1)	SRR317051(1;1),
chr12	57458551	-	canonical	TACAT(A*)T	A	57458522	-29	expected	1	1	yes	no	yes	0,0,(1)	0,0,(1)	0,0,(1)	0,0,(1)	SRR317065(1;1),
chr12	57493896	-	canonical	GGCTC(A*)C	A	57493873	-23	expected	5	4	yes	yes	yes	0,1,(4)	0,1,(3)	0,1,(4)	0,1,(3)	SRR307914(2;1),SRR317063(1;1),SRR545705(1;1),SRR317067(1;1),
chr12	57663256	-	canonical	TTCTC(A*)C	A	57663232	-24	expected	1	1	yes	no	yes	0,0,(1)	0,0,(1)	0,0,(1)	0,0,(1)	SRR317043(1;1),
chr12	57926788	-	canonical	TGCAG(G*)T	G	57926593	-195	distal	2	1	no	no	yes	0,2,(0)	0,1,(0)	0,0,(0)	0,0,(0)	SRR317050(2;1),
chr12	58159302	-	canonical	TGCGC(A*)C	A	58159282	-20	expected	3	3	yes	yes	yes	0,3,(0)	0,3,(0)	0,1,(0)	0,1,(0)	SRR317050(1;1),SRR317051(1;1),SRR317056(1;1),
chr12	59272913	-	canonical	TGCTA(A*)T	A	59272887	-26	expected	1	1	yes	no	yes	0,1,(0)	0,1,(0)	0,1,(0)	0,1,(0)	SRR545701(1;1),
chr12	59283939	-	canonical	AGCTC(A*)T	A	59283921	-18	expected	3	1	no	no	yes	0,0,(3)	0,0,(1)	0,0,(0)	0,0,(0)	SRR545719(3;1),
chr12	63087810	-	canonical	TGCAA(A*)C	A	63087779	-31	expected	1	1	no	no	yes	1,0,(0)	1,0,(0)	0,0,(0)	0,0,(0)	SRR317055(1;1),
chr12	72004565	-	canonical	TTCTG(A*)T	A	72004537	-28	expected	2	1	no	no	yes	2,0,(0)	1,0,(0)	0,0,(0)	0,0,(0)	SRR317062(2;1),
chr12	72017419	-	canonical	TACTG(A*)C	A	72017377	-42	expected	1	1	no	no	yes	1,0,(0)	1,0,(0)	0,0,(0)	0,0,(0)	SRR534317(1;1),
chr12	76448895	-	canonical	TATTC(A*)T	A	76448870	-25	expected	3	3	yes	yes	yes	0,0,(3)	0,0,(3)	0,0,(2)	0,0,(2)	SRR307923(1;1),SRR545687(1;1),SRR307924(1;1),
chr12	76453687	-	canonical	TTTTT(A*)T	A	76453658	-29	expected	1	1	no	no	yes	0,0,(1)	0,0,(1)	0,0,(0)	0,0,(0)	SRR317043(1;1),
chr12	88447544	-	canonical	TTTTA(A*)C	A	88447523	-21	expected	4	2	no	yes	yes	0,4,(0)	0,2,(0)	0,0,(0)	0,0,(0)	SRR534326(2;1),SRR545703(2;1),
chr12	88909416	-	canonical	CACTG(A*)C	A	88909394	-22	expected	1	1	no	no	yes	1,0,(0)	1,0,(0)	0,0,(0)	0,0,(0)	SRR545707(1;1),
chr12	91546993	-	canonical	TGCTA(A*)T	A	91546966	-27	expected	3	2	yes	yes	yes	2,0,(1)	1,0,(1)	0,0,(1)	0,0,(1)	SRR545704(1;1),SRR545701(2;1),
chr12	96104439	-	canonical	TACTT(A*)T	A	96104407	-32	expected	4	1	yes	no	yes	0,0,(4)	0,0,(1)	0,0,(4)	0,0,(1)	SRR317067(4;1),
chr12	96412703	-	canonical	TACAG(A*)C	A	96412681	-22	expected	1	1	no	no	yes	0,1,(0)	0,1,(0)	0,0,(0)	0,0,(0)	SRR317050(1;1),
chr12	96717989	-	canonical	TACTA(A*)T	A	96717890	-99	distal	4	2	yes	yes	yes	0,0,(4)	0,0,(2)	0,0,(4)	0,0,(2)	SRR534335(1;1),SRR545717(3;1),
chr12	104187797	-	canonical	CGCTG(A*)T	A	104187775	-22	expected	1	1	no	no	yes	1,0,(0)	1,0,(0)	0,0,(0)	0,0,(0)	SRR317042(1;1),
chr12	105569885	-	canonical	TGCCA(A*)T	A	105569860	-25	expected	1	1	yes	no	yes	0,0,(1)	0,0,(1)	0,0,(1)	0,0,(1)	SRR317049(1;1),
chr12	106466653	-	canonical	TGCTA(A*)C	A	106466621	-32	expected	1	1	no	no	yes	0,0,(1)	0,0,(1)	0,0,(0)	0,0,(0)	SRR545717(1;1),
chr12	108154572	-	canonical	TGGTG(A*)C	A	108154548	-24	expected	2	1	no	no	yes	0,2,(0)	0,1,(0)	0,0,(0)	0,0,(0)	SRR545691(2;1),
chr12	109196171	-	canonical	CACTC(A*)C	A	109196144	-27	expected	1	1	no	no	yes	0,1,(0)	0,1,(0)	0,0,(0)	0,0,(0)	SRR315318(1;1),
chr12	110009532	-	canonical	TACTG(A*)T	A	110009515	-17	expected	4	3	no	yes	yes	4,0,(0)	3,0,(0)	0,0,(0)	0,0,(0)	SRR534317(2;1),SRR307914(1;1),SRR307922(1;1),
chr12	110009543	-	canonical	CACTC(A*)C	A	110009515	-28	expected	9	5	yes	yes	yes	0,4,(5)	0,3,(2)	0,0,(5)	0,0,(2)	SRR317049(4;1),SRR317066(1;1),SRR545720(1;1),SRR545706(2;1),SRR307924(1;1),
chr12	110974922	-	canonical	TACTG(A*)T	A	110974900	-22	expected	5	3	no	yes	yes	5,0,(0)	3,0,(0)	0,0,(0)	0,0,(0)	SRR545690(3;1),SRR545689(1;1),SRR534317(1;1),
chr12	111160098	-	canonical	TATTT(A*)T	A	111160074	-24	expected	17	10	yes	yes	yes	1,0,(16)	1,0,(9)	0,0,(16)	0,0,(9)	SRR317062(1;1),SRR307930(1;1),SRR315317(2;1),SRR545719(5;1),SRR317042(5;3),SRR317051(1;1),SRR317050(1;1),SRR545706(1;1),
chr12	111160525	-	canonical	TCTTC(A*)T	A	111160500	-25	expected	20	13	yes	yes	yes	0,0,(20)	0,0,(13)	0,0,(15)	0,0,(10)	SRR545693(3;1),SRR545701(1;1),SRR317062(1;1),SRR317056(4;2),SRR317055(1;1),SRR545718(3;1),SRR545721(2;1),SRR534318(2;2),SRR545717(1;1),SRR307914(1;1),SRR545716(1;1),
chr12	111990253	-	canonical	TACTT(A*)C	A	111990234	-19	expected	2	1	yes	no	yes	0,0,(2)	0,0,(1)	0,0,(2)	0,0,(1)	SRR534327(2;1),
chr12	111992048	-	canonical	TTCTA(A*)T	A	111992021	-27	expected	1	1	no	no	yes	0,1,(0)	0,1,(0)	0,0,(0)	0,0,(0)	SRR545707(1;1),
chr12	112617236	-	canonical	TGTTC(A*)C	A	112617201	-35	expected	1	1	yes	no	yes	0,0,(1)	0,0,(1)	0,0,(1)	0,0,(1)	SRR307921(1;1),
chr12	112631013	-	canonical	TCCTT(A*)T	A	112630995	-18	expected	3	3	yes	yes	yes	0,0,(3)	0,0,(3)	0,0,(3)	0,0,(3)	SRR317069(1;1),SRR534312(1;1),SRR534311(1;1),
chr12	112646463	-	canonical	TGTTT(A*)G	A	112646434	-29	expected	1	1	yes	no	yes	0,0,(1)	0,0,(1)	0,0,(1)	0,0,(1)	SRR315312(1;1),
chr12	112685373	-	canonical	TGCAT(A*)C	A	112685354	-19	expected	6	3	yes	yes	yes	6,0,(0)	3,0,(0)	6,0,(0)	3,0,(0)	SRR545705(4;2),SRR545702(2;1),
chr12	112703808	-	canonical	AGTTG(A*)T	A	112703787	-21	expected	2	1	yes	no	yes	0,0,(2)	0,0,(1)	0,0,(2)	0,0,(1)	SRR545690(2;1),
chr12	115110136	-	canonical	GGCTG(A*)C	A	115110107	-29	expected	1	1	no	no	yes	1,0,(0)	1,0,(0)	0,0,(0)	0,0,(0)	SRR317049(1;1),
chr12	116434511	-	canonical	TATTA(A*)C	A	116434486	-25	expected	3	2	no	yes	yes	2,1,(0)	1,1,(0)	0,0,(0)	0,0,(0)	SRR317068(1;1),SRR545692(2;1),
chr12	116444247	-	canonical	TGTTC(A*)T	A	116444216	-31	expected	1	1	yes	no	yes	0,0,(1)	0,0,(1)	0,0,(1)	0,0,(1)	SRR317043(1;1),
chr12	118675997	-	canonical	TACTG(A*)C	A	118675974	-23	expected	1	1	no	no	yes	1,0,(0)	1,0,(0)	0,0,(0)	0,0,(0)	SRR545692(1;1),
chr12	120150697	-	canonical	TACTC(A*)T	A	120150500	-197	distal	1	1	yes	no	yes	0,0,(1)	0,0,(1)	0,0,(1)	0,0,(1)	SRR307914(1;1),
chr12	120263192	-	canonical	TATTC(G*)T	G	120263172	-20	expected	1	1	no	no	yes	0,1,(0)	0,1,(0)	0,0,(0)	0,0,(0)	SRR307930(1;1),
chr12	120575152	-	canonical	TGTAC(A*)T	A	120575123	-29	expected	1	1	no	no	yes	0,1,(0)	0,1,(0)	0,0,(0)	0,0,(0)	SRR317063(1;1),
chr12	120582272	-	canonical	GGCTG(A*)C	A	120582252	-20	expected	2	2	yes	yes	yes	0,0,(2)	0,0,(2)	0,0,(2)	0,0,(2)	SRR317062(1;1),SRR317064(1;1),
chr12	120582894	-	canonical	TTCTC(A*)C	A	120582865	-29	expected	2	1	no	no	yes	0,2,(0)	0,1,(0)	0,0,(0)	0,0,(0)	SRR317062(2;1),
chr12	120591735	-	canonical	TCCTG(A*)T	A	120591713	-22	expected	5	4	yes	yes	yes	4,1,(0)	3,1,(0)	0,1,(0)	0,1,(0)	SRR315310(1;1),SRR317062(1;1),SRR317064(1;1),SRR545709(2;1),
chr12	120594437	-	canonical	TGCTG(A*)C	A	120594408	-29	expected	1	1	yes	no	yes	0,1,(0)	0,1,(0)	0,1,(0)	0,1,(0)	SRR317050(1;1),
chr12	120598128	-	canonical	AGCTC(A*)C	A	120598059	-69	distal	1	1	yes	no	yes	0,0,(1)	0,0,(1)	0,0,(1)	0,0,(1)	SRR317049(1;1),
chr12	120622718	-	canonical	TATTG(A*)C	A	120622690	-28	expected	1	1	no	no	yes	1,0,(0)	1,0,(0)	0,0,(0)	0,0,(0)	SRR307913(1;1),
chr12	121691323	-	canonical	TGCTC(A*)C	A	121691275	-48	expected	3	2	yes	yes	yes	0,2,(1)	0,1,(1)	0,2,(1)	0,1,(1)	SRR545706(2;1),SRR317056(1;1),
chr12	121698222	-	canonical	TGCTC(A*)T	A	121698158	-64	distal	6	2	yes	yes	yes	0,0,(6)	0,0,(2)	0,0,(6)	0,0,(2)	SRR545705(5;1),SRR315310(1;1),
chr12	122757669	-	canonical	TTCTG(A*)T	A	122757647	-22	expected	3	2	yes	yes	yes	2,0,(1)	1,0,(1)	0,0,(1)	0,0,(1)	SRR545706(2;1),SRR315305(1;1),
chr12	122803915	-	canonical	TTCTC(A*)C	A	122803895	-20	expected	14	8	yes	yes	yes	0,0,(14)	0,0,(8)	0,0,(3)	0,0,(1)	SRR317063(1;1),SRR545694(2;1),SRR317050(1;1),SRR545720(1;1),SRR534289(3;1),SRR317042(3;1),SRR545692(2;1),SRR317069(1;1),
chr12	122983437	-	canonical	GGCTT(A*)T	A	122983414	-23	expected	1	1	no	no	yes	0,1,(0)	0,1,(0)	0,0,(0)	0,0,(0)	SRR545688(1;1),
chr12	123005153	-	canonical	TGATA(A*)C	A	123005128	-25	expected	3	3	yes	yes	yes	2,0,(1)	2,0,(1)	0,0,(1)	0,0,(1)	SRR545713(1;1),SRR317054(1;1),SRR545721(1;1),
chr12	123497304	-	canonical	TCCTG(A*)T	A	123497281	-23	expected	3	1	no	no	yes	0,0,(3)	0,0,(1)	0,0,(0)	0,0,(0)	SRR545706(3;1),
chr12	124817036	-	canonical	AGCTG(A*)T	A	124817013	-23	expected	10	7	no	yes	yes	9,0,(1)	6,0,(1)	0,0,(0)	0,0,(0)	SRR545705(2;1),SRR545687(1;1),SRR534334(1;1),SRR534326(1;1),SRR545690(2;1),SRR317062(1;1),SRR317064(2;1),
chr12	124832884	-	canonical	TCCTC(A*)C	A	124832860	-24	expected	10	5	yes	yes	yes	0,1,(9)	0,1,(4)	0,0,(7)	0,0,(3)	SRR545686(2;1),SRR545694(2;1),SRR545685(3;1),SRR534318(1;1),SRR545719(2;1),
chr12	124846863	-	canonical	TGCTC(A*)C	A	124846843	-20	expected	2	2	yes	yes	yes	0,0,(2)	0,0,(2)	0,0,(2)	0,0,(2)	SRR317042(1;1),SRR317063(1;1),
chr12	133219602	-	canonical	GGCTG(A*)C	A	133219582	-20	expected	1	1	no	no	yes	1,0,(0)	1,0,(0)	0,0,(0)	0,0,(0)	SRR315311(1;1),
chr12	133252810	-	canonical	TGCTG(A*)T	A	133252790	-20	expected	19	6	yes	yes	yes	17,1,(1)	4,1,(1)	0,0,(1)	0,0,(1)	SRR545708(6;1),SRR545711(9;1),SRR317043(1;1),SRR315311(1;1),SRR317042(1;1),SRR315305(1;1),
chr12	133304052	-	canonical	TGCTA(A*)C	A	133304029	-23	expected	6	4	yes	yes	yes	4,2,(0)	3,1,(0)	4,0,(0)	3,0,(0)	SRR545716(2;1),SRR317063(1;1),SRR545712(3;2),
chr12	133357545	-	canonical	TGTTT(G*)T	G	133357500	-45	expected	5	1	no	no	yes	0,5,(0)	0,1,(0)	0,0,(0)	0,0,(0)	SRR545694(5;1),
chr12	998285	+	canonical	TATTT(A*)C	A	998305	-20	expected	1	1	yes	no	yes	0,0,(1)	0,0,(1)	0,0,(1)	0,0,(1)	SRR317066(1;1),
chr12	1009620	+	canonical	TCCTC(A*)T	A	1009641	-21	expected	1	1	yes	no	yes	0,0,(1)	0,0,(1)	0,0,(1)	0,0,(1)	SRR317067(1;1),
chr12	2676657	+	canonical	TAATT(A*)C	A	2676734	-77	distal	3	1	yes	no	yes	0,0,(3)	0,0,(1)	0,0,(3)	0,0,(1)	SRR545721(3;1),
chr12	6342553	+	canonical	TTCTC(A*)C	A	6342577	-24	expected	1	1	yes	no	yes	0,0,(1)	0,0,(1)	0,0,(1)	0,0,(1)	SRR317056(1;1),
chr12	6346908	+	canonical	TCCTC(A*)T	A	6346928	-20	expected	1	1	yes	no	yes	0,0,(1)	0,0,(1)	0,0,(1)	0,0,(1)	SRR317046(1;1),
chr12	6638919	+	canonical	TCCTC(A*)C	A	6638940	-21	expected	1	1	yes	no	yes	0,0,(1)	0,0,(1)	0,0,(1)	0,0,(1)	SRR317050(1;1),
chr12	6645634	+	canonical	TCCTC(A*)T	A	6645659	-25	expected	6	4	yes	yes	yes	0,0,(6)	0,0,(4)	0,0,(6)	0,0,(4)	SRR534327(2;1),SRR317065(1;1),SRR317062(1;1),SRR534325(2;1),
chr12	6975119	+	canonical	TGTTC(A*)T	A	6975147	-28	expected	5	3	yes	yes	yes	0,0,(5)	0,0,(3)	0,0,(1)	0,0,(1)	SRR534335(4;2),SRR307914(1;1),
chr12	7050017	+	canonical	TGGTG(A*)C	A	7050042	-25	expected	1	1	yes	no	yes	0,0,(1)	0,0,(1)	0,0,(1)	0,0,(1)	SRR317054(1;1),
chr12	7084837	+	canonical	GGCTG(A*)C	A	7084857	-20	expected	4	1	no	no	yes	4,0,(0)	1,0,(0)	0,0,(0)	0,0,(0)	SRR307914(4;1),
chr12	7285583	+	canonical	TGCTC(A*)C	A	7285619	-36	expected	1	1	yes	no	yes	0,0,(1)	0,0,(1)	0,0,(1)	0,0,(1)	SRR317043(1;1),
chr12	7355188	+	canonical	TACTG(A*)C	A	7355207	-19	expected	1	1	no	no	yes	1,0,(0)	1,0,(0)	0,0,(0)	0,0,(0)	SRR545718(1;1),
chr12	10370635	+	canonical	TTTTC(A*)T	A	10370661	-26	expected	1	1	yes	no	yes	0,0,(1)	0,0,(1)	0,0,(1)	0,0,(1)	SRR317065(1;1),
chr12	12871716	+	canonical	TTCTA(A*)T	A	12871758	-42	expected	5	4	yes	yes	yes	0,1,(4)	0,1,(3)	0,1,(4)	0,1,(3)	SRR545694(1;1),SRR545690(2;1),SRR534311(2;2),
chr12	12975570	+	canonical	TATTG(G*)C	G	12975594	-24	expected	2	1	yes	no	yes	0,2,(0)	0,1,(0)	0,2,(0)	0,1,(0)	SRR534325(2;1),
chr12	16043509	+	canonical	TATTC(A*)C	A	16043530	-21	expected	2	1	no	no	yes	0,0,(2)	0,0,(1)	0,0,(0)	0,0,(0)	SRR545704(2;1),
chr12	16046950	+	canonical	TATTA(A*)C	A	16046980	-30	expected	1	1	yes	no	yes	0,0,(1)	0,0,(1)	0,0,(1)	0,0,(1)	SRR545704(1;1),
chr12	16189600	+	canonical	TGTTA(A*)T	A	16189623	-23	expected	1	1	yes	no	yes	0,1,(0)	0,1,(0)	0,1,(0)	0,1,(0)	SRR545705(1;1),
chr12	25242518	+	canonical	TTTTA(A*)C	A	25242547	-29	expected	2	2	no	yes	yes	0,0,(2)	0,0,(2)	0,0,(0)	0,0,(0)	SRR307921(1;1),SRR545687(1;1),
chr12	26217403	+	canonical	TTTTG(A*)C	A	26217430	-27	expected	1	1	no	no	yes	0,1,(0)	0,1,(0)	0,0,(0)	0,0,(0)	SRR545718(1;1),
chr12	27116247	+	canonical	TGCTG(A*)T	A	27116274	-27	expected	5	1	no	no	yes	5,0,(0)	1,0,(0)	0,0,(0)	0,0,(0)	SRR545690(5;1),
chr12	29464791	+	canonical	TACTT(A*)T	A	29464815	-24	expected	3	1	yes	no	yes	0,0,(3)	0,0,(1)	0,0,(3)	0,0,(1)	SRR534326(3;1),
chr12	29474704	+	canonical	TATTT(A*)C	A	29474727	-23	expected	3	1	yes	no	yes	0,0,(3)	0,0,(1)	0,0,(3)	0,0,(1)	SRR545720(3;1),
chr12	31255880	+	canonical	TGGTG(A*)T	A	31256250	-370	distal	1	1	no	no	yes	0,1,(0)	0,1,(0)	0,0,(0)	0,0,(0)	SRR317039(1;1),
chr12	38712037	+	canonical	TGCTT(T*)T	T	38712062	-25	expected	13	4	yes	yes	yes	0,0,(13)	0,0,(4)	0,0,(6)	0,0,(1)	SRR545706(2;1),SRR534334(4;1),SRR317045(1;1),SRR545705(6;1),
chr12	49218926	+	canonical	TACTG(A*)C	A	49218945	-19	expected	1	1	no	no	yes	1,0,(0)	1,0,(0)	0,0,(0)	0,0,(0)	SRR545718(1;1),
chr12	49723616	+	canonical	TGCTT(G*)T	G	49723639	-23	expected	1	1	yes	no	yes	0,0,(1)	0,0,(1)	0,0,(1)	0,0,(1)	SRR545706(1;1),
chr12	49723896	+	canonical	TCTTG(A*)T	A	49723927	-31	expected	1	1	no	no	yes	1,0,(0)	1,0,(0)	0,0,(0)	0,0,(0)	SRR317064(1;1),
chr12	51053951	+	canonical	AGCTA(A*)T	A	51053976	-25	expected	1	1	yes	no	yes	0,0,(1)	0,0,(1)	0,0,(1)	0,0,(1)	SRR315309(1;1),
chr12	51068225	+	canonical	TGCTA(A*)T	A	51068256	-31	expected	4	1	yes	no	yes	0,0,(4)	0,0,(1)	0,0,(4)	0,0,(1)	SRR545713(4;1),
chr12	51089607	+	canonical	TGTTA(A*)C	A	51089630	-23	expected	1	1	yes	no	yes	0,0,(1)	0,0,(1)	0,0,(1)	0,0,(1)	SRR307921(1;1),
chr12	52387746	+	canonical	AGCTG(A*)T	A	52387768	-22	expected	2	1	no	no	yes	2,0,(0)	1,0,(0)	0,0,(0)	0,0,(0)	SRR545718(2;1),
chr12	53416250	+	canonical	AACTT(A*)C	A	53416276	-26	expected	6	4	yes	yes	yes	0,4,(2)	0,2,(2)	0,0,(2)	0,0,(2)	SRR317042(2;2),SRR545713(3;1),SRR315312(1;1),
chr12	53432111	+	canonical	AACTG(A*)T	A	53432139	-28	expected	1	1	yes	no	yes	0,0,(1)	0,0,(1)	0,0,(1)	0,0,(1)	SRR307930(1;1),
chr12	53446211	+	canonical	TGCTA(A*)C	A	53446238	-27	expected	1	1	no	no	yes	1,0,(0)	1,0,(0)	0,0,(0)	0,0,(0)	SRR317050(1;1),
chr12	53662779	+	canonical	TGCTA(G*)C	G	53662807	-28	expected	2	2	yes	yes	yes	1,1,(0)	1,1,(0)	0,1,(0)	0,1,(0)	SRR317050(2;2),
chr12	53849109	+	canonical	TACTG(A*)C	A	53849130	-21	expected	3	3	no	yes	yes	2,1,(0)	2,1,(0)	0,0,(0)	0,0,(0)	SRR315310(1;1),SRR317042(1;1),SRR545701(1;1),
chr12	53853031	+	canonical	TGCTT(A*)T	A	53853055	-24	expected	2	2	yes	yes	yes	0,0,(2)	0,0,(2)	0,0,(2)	0,0,(2)	SRR317051(1;1),SRR315305(1;1),
chr12	53860977	+	canonical	TTCTA(A*)T	A	53861004	-27	expected	1	1	no	no	yes	0,1,(0)	0,1,(0)	0,0,(0)	0,0,(0)	SRR317043(1;1),
chr12	56113248	+	canonical	TTCTG(A*)T	A	56113282	-34	expected	1	1	yes	no	yes	0,0,(1)	0,0,(1)	0,0,(1)	0,0,(1)	SRR317042(1;1),
chr12	56334394	+	canonical	TGCCC(A*)C	A	56334407	-13	expected	1	1	yes	no	yes	0,1,(0)	0,1,(0)	0,1,(0)	0,1,(0)	SRR317041(1;1),
chr12	56501284	+	canonical	TACTG(A*)T	A	56501304	-20	expected	2	2	yes	yes	yes	0,0,(2)	0,0,(2)	0,0,(2)	0,0,(2)	SRR317043(1;1),SRR317040(1;1),
chr12	56506573	+	canonical	AACTG(A*)C	A	56506606	-33	expected	12	9	yes	yes	yes	1,0,(11)	1,0,(8)	0,0,(11)	0,0,(8)	SRR317051(3;2),SRR317055(1;1),SRR317043(1;1),SRR317049(2;1),SRR317054(2;2),SRR317042(3;2),
chr12	56510909	+	canonical	TACTA(A*)T	A	56510972	-63	distal	4	1	no	no	yes	0,0,(4)	0,0,(1)	0,0,(0)	0,0,(0)	SRR545707(4;1),
chr12	56525101	+	canonical	TGCAG(G*)T	G	56525260	-159	distal	1	1	no	no	yes	1,0,(0)	1,0,(0)	0,0,(0)	0,0,(0)	SRR315311(1;1),
chr12	56552444	+	canonical	TGCTG(A*)C	A	56552467	-23	expected	4	3	no	yes	yes	4,0,(0)	3,0,(0)	0,0,(0)	0,0,(0)	SRR317037(1;1),SRR315318(2;1),SRR317055(1;1),
chr12	56553351	+	canonical	TGTTG(A*)C	A	56553370	-19	expected	1	1	yes	no	yes	0,0,(1)	0,0,(1)	0,0,(1)	0,0,(1)	SRR315317(1;1),
chr12	56554383	+	canonical	TCTTC(A*)C	A	56554409	-26	expected	12	1	yes	no	yes	0,0,(12)	0,0,(1)	0,0,(12)	0,0,(1)	SRR545710(12;1),
chr12	56555149	+	canonical	GGCTC(A*)T	A	56555170	-21	expected	1	1	yes	no	yes	0,0,(1)	0,0,(1)	0,0,(1)	0,0,(1)	SRR317064(1;1),
chr12	57550537	+	canonical	TCCTA(A*)C	A	57550559	-22	expected	2	1	no	no	yes	0,2,(0)	0,1,(0)	0,0,(0)	0,0,(0)	SRR545714(2;1),
chr12	57554658	+	canonical	TGCTG(A*)C	A	57554675	-17	expected	2	1	yes	no	yes	0,0,(2)	0,0,(1)	0,0,(2)	0,0,(1)	SRR545694(2;1),
chr12	57556081	+	canonical	TAGTA(A*)C	A	57556099	-18	expected	1	1	no	no	yes	0,1,(0)	0,1,(0)	0,0,(0)	0,0,(0)	SRR534326(1;1),
chr12	57560692	+	canonical	TACTC(A*)C	A	57560712	-20	expected	14	6	yes	yes	yes	4,5,(5)	2,1,(3)	0,5,(5)	0,1,(3)	SRR534317(1;1),SRR545692(1;1),SRR545701(2;1),SRR545694(3;1),SRR545705(7;2),
chr12	57578082	+	canonical	GACTG(A*)C	A	57578108	-26	expected	5	1	no	no	yes	5,0,(0)	1,0,(0)	0,0,(0)	0,0,(0)	SRR545712(5;1),
chr12	57581022	+	canonical	TCCTG(A*)C	A	57581049	-27	expected	10	5	yes	yes	yes	2,1,(7)	2,1,(2)	0,1,(7)	0,1,(2)	SRR317065(1;1),SRR317039(1;1),SRR545712(6;1),SRR317044(1;1),SRR545720(1;1),
chr12	57587322	+	canonical	GGCTG(A*)C	A	57587348	-26	expected	17	6	yes	yes	yes	15,0,(2)	5,0,(1)	0,0,(2)	0,0,(1)	SRR534318(9;2),SRR534335(6;3),SRR315308(2;1),
chr12	57595540	+	canonical	TCCTC(A*)C	A	57595562	-22	expected	1	1	yes	no	yes	0,0,(1)	0,0,(1)	0,0,(1)	0,0,(1)	SRR317054(1;1),
chr12	57602475	+	canonical	CACTC(A*)C	A	57602493	-18	expected	17	8	yes	yes	yes	0,0,(17)	0,0,(8)	0,0,(15)	0,0,(7)	SRR545719(3;1),SRR307923(1;1),SRR545703(3;1),SRR317039(3;2),SRR534327(1;1),SRR545694(4;1),SRR545720(2;1),
chr12	57883965	+	canonical	TGCTG(A*)T	A	57883989	-24	expected	1	1	yes	no	yes	0,0,(1)	0,0,(1)	0,0,(1)	0,0,(1)	SRR315309(1;1),
chr12	57918041	+	canonical	TGCCT(A*)C	A	57918062	-21	expected	1	1	no	no	yes	0,0,(1)	0,0,(1)	0,0,(0)	0,0,(0)	SRR317063(1;1),
chr12	57958679	+	canonical	TGCTT(A*)C	A	57958700	-21	expected	1	1	no	no	yes	0,0,(1)	0,0,(1)	0,0,(0)	0,0,(0)	SRR315305(1;1),
chr12	58090025	+	canonical	TTCTC(A*)T	A	58090057	-32	expected	1	1	yes	no	yes	0,0,(1)	0,0,(1)	0,0,(1)	0,0,(1)	SRR307921(1;1),
chr12	58112752	+	canonical	GACTC(A*)C	A	58112775	-23	expected	1	1	yes	no	yes	0,0,(1)	0,0,(1)	0,0,(1)	0,0,(1)	SRR317050(1;1),
chr12	58176871	+	canonical	TCCTC(A*)T	A	58176892	-21	expected	4	4	yes	yes	yes	0,0,(4)	0,0,(4)	0,0,(3)	0,0,(3)	SRR307924(1;1),SRR307914(1;1),SRR315305(1;1),SRR315310(1;1),
chr12	64828264	+	canonical	TGCTT(A*)A	A	64828286	-22	expected	2	2	no	yes	yes	0,2,(0)	0,2,(0)	0,0,(0)	0,0,(0)	SRR545694(1;1),SRR545692(1;1),
chr12	65604677	+	canonical	TGCTA(A*)T	A	65604705	-28	expected	5	1	yes	no	yes	0,0,(5)	0,0,(1)	0,0,(5)	0,0,(1)	SRR545714(5;1),
chr12	67688778	+	canonical	TGCTT(G*)C	G	67688812	-34	expected	2	1	yes	no	yes	0,0,(2)	0,0,(1)	0,0,(2)	0,0,(1)	SRR545694(2;1),
chr12	69121104	+	canonical	TATTT(A*)T	A	69121130	-26	expected	2	2	yes	yes	yes	0,0,(2)	0,0,(2)	0,0,(1)	0,0,(1)	SRR317051(1;1),SRR317055(1;1),
chr12	69129011	+	canonical	TGCAG(A*)T	A	69135592	-6581	distal	1	1	no	no	yes	1,0,(0)	1,0,(0)	0,0,(0)	0,0,(0)	SRR534325(1;1),
chr12	69202964	+	canonical	TTTTC(A*)T	A	69202987	-23	expected	1	1	yes	no	yes	0,0,(1)	0,0,(1)	0,0,(1)	0,0,(1)	SRR307930(1;1),
chr12	69214071	+	canonical	TGTAC(A*)T	A	69214104	-33	expected	13	10	yes	yes	yes	1,1,(11)	1,1,(8)	1,1,(10)	1,1,(7)	SRR545717(3;2),SRR545688(1;1),SRR545709(1;1),SRR317046(1;1),SRR545721(1;1),SRR545692(1;1),SRR307930(1;1),SRR545707(1;1),SRR545704(3;1),
chr12	69230434	+	canonical	TGCTA(A*)T	A	69230451	-17	expected	30	19	yes	yes	yes	10,17,(3)	6,10,(3)	0,3,(3)	0,2,(3)	SRR545723(1;1),SRR545701(3;1),SRR545714(3;1),SRR545707(3;3),SRR545718(1;1),SRR545693(5;1),SRR545703(3;2),SRR545717(3;2),SRR545709(1;1),SRR534326(2;1),SRR545705(1;1),SRR545720(1;1),SRR545694(3;3),
chr12	69651490	+	canonical	TATTT(A*)T	A	69651511	-21	expected	2	2	yes	yes	yes	1,0,(1)	1,0,(1)	0,0,(1)	0,0,(1)	SRR545717(1;1),SRR317039(1;1),
chr12	70724040	+	canonical	AGCTT(A*)T	A	70724066	-26	expected	4	1	yes	no	yes	0,0,(4)	0,0,(1)	0,0,(4)	0,0,(1)	SRR545713(4;1),
chr12	77222143	+	canonical	AGCTC(A*)T	A	77222169	-26	expected	4	2	yes	yes	yes	0,0,(4)	0,0,(2)	0,0,(3)	0,0,(1)	SRR534318(3;1),SRR545685(1;1),
chr12	78444522	+	canonical	TAGTT(A*)T	A	78444543	-21	expected	2	1	yes	no	yes	0,0,(2)	0,0,(1)	0,0,(2)	0,0,(1)	SRR545717(2;1),
chr12	94580112	+	canonical	TGCTT(A*)T	A	94580148	-36	expected	1	1	no	no	yes	0,0,(1)	0,0,(1)	0,0,(0)	0,0,(0)	SRR307922(1;1),
chr12	95650290	+	canonical	TAGTT(A*)C	A	95650325	-35	expected	1	1	no	no	yes	0,0,(1)	0,0,(1)	0,0,(0)	0,0,(0)	SRR315317(1;1),
chr12	97328719	+	canonical	TGCTT(A*)T	A	97328753	-34	expected	2	1	no	no	yes	2,0,(0)	1,0,(0)	0,0,(0)	0,0,(0)	SRR545704(2;1),
chr12	98989182	+	canonical	TACTT(A*)C	A	98989210	-28	expected	2	1	yes	no	yes	0,0,(2)	0,0,(1)	0,0,(2)	0,0,(1)	SRR534334(2;1),
chr12	101734276	+	canonical	TCCTT(A*)T	A	101734300	-24	expected	1	1	yes	no	yes	0,0,(1)	0,0,(1)	0,0,(1)	0,0,(1)	SRR317035(1;1),
chr12	104326036	+	canonical	TGCTT(A*)C	A	104326054	-18	expected	5	5	yes	yes	yes	1,0,(4)	1,0,(4)	0,0,(3)	0,0,(3)	SRR545692(2;2),SRR534289(1;1),SRR317051(1;1),SRR317055(1;1),
chr12	104337289	+	canonical	TACAA(A*)T	A	104337515	-226	distal	1	1	yes	no	yes	1,0,(0)	1,0,(0)	1,0,(0)	1,0,(0)	SRR317055(1;1),
chr12	105558394	+	canonical	TTTTT(A*)T	A	105558418	-24	expected	6	3	yes	yes	yes	0,0,(6)	0,0,(3)	0,0,(6)	0,0,(3)	SRR317047(1;1),SRR545723(2;1),SRR534318(3;1),
chr12	106890506	+	canonical	TGCTC(A*)C	A	106890529	-23	expected	2	1	yes	no	yes	0,0,(2)	0,0,(1)	0,0,(2)	0,0,(1)	SRR545716(2;1),
chr12	108091219	+	canonical	TAATC(A*)T	A	108091243	-24	expected	1	1	yes	no	yes	0,0,(1)	0,0,(1)	0,0,(1)	0,0,(1)	SRR545694(1;1),
chr12	108959070	+	canonical	GACTC(A*)C	A	108959096	-26	expected	2	1	yes	no	yes	0,0,(2)	0,0,(1)	0,0,(2)	0,0,(1)	SRR534317(2;1),
chr12	109523444	+	canonical	TGTAA(A*)C	A	109523471	-27	expected	1	1	yes	no	yes	1,0,(0)	1,0,(0)	1,0,(0)	1,0,(0)	SRR317054(1;1),
chr12	109696054	+	canonical	GGCTC(A*)C	A	109696072	-18	expected	1	1	yes	no	yes	0,0,(1)	0,0,(1)	0,0,(1)	0,0,(1)	SRR317063(1;1),
chr12	109936012	+	canonical	TTCTG(A*)T	A	109936037	-25	expected	1	1	yes	no	yes	0,0,(1)	0,0,(1)	0,0,(1)	0,0,(1)	SRR317042(1;1),
chr12	109958927	+	canonical	TCCTA(A*)T	A	109958952	-25	expected	1	1	yes	no	yes	0,0,(1)	0,0,(1)	0,0,(1)	0,0,(1)	SRR545717(1;1),
chr12	110780008	+	canonical	GGCTG(A*)C	A	110780032	-24	expected	1	1	no	no	yes	1,0,(0)	1,0,(0)	0,0,(0)	0,0,(0)	SRR317064(1;1),
chr12	113729634	+	canonical	TACCC(A*)C	A	113729678	-44	expected	27	21	yes	yes	yes	1,1,(25)	1,1,(19)	0,1,(25)	0,1,(19)	SRR317050(1;1),SRR317044(3;3),SRR317052(1;1),SRR307913(3;1),SRR317063(1;1),SRR315318(1;1),SRR317035(1;1),SRR534317(1;1),SRR317036(2;2),SRR317064(4;2),SRR545708(2;1),SRR317062(3;2),SRR317048(2;2),SRR545707(1;1),SRR317065(1;1),
chr12	118577233	+	canonical	TGCTG(A*)C	A	118577255	-22	expected	1	1	no	no	yes	1,0,(0)	1,0,(0)	0,0,(0)	0,0,(0)	SRR307914(1;1),
chr12	120117714	+	canonical	TGCTC(A*)C	A	120117737	-23	expected	3	1	yes	no	yes	0,0,(3)	0,0,(1)	0,0,(3)	0,0,(1)	SRR307930(3;1),
chr12	121670776	+	canonical	GGCTC(A*)C	A	121670799	-23	expected	5	3	yes	yes	yes	0,0,(5)	0,0,(3)	0,0,(5)	0,0,(3)	SRR307913(2;1),SRR317055(1;1),SRR315317(2;1),
chr12	122354162	+	canonical	AACTT(A*)C	A	122354189	-27	expected	4	1	yes	no	yes	0,0,(4)	0,0,(1)	0,0,(4)	0,0,(1)	SRR534318(4;1),
chr12	123060325	+	canonical	TGTTA(A*)T	A	123060346	-21	expected	1	1	yes	no	yes	0,0,(1)	0,0,(1)	0,0,(1)	0,0,(1)	SRR307923(1;1),
chr12	123249822	+	canonical	TGTTC(A*)T	A	123249850	-28	expected	1	1	no	no	yes	0,0,(1)	0,0,(1)	0,0,(0)	0,0,(0)	SRR545687(1;1),
chr12	123276534	+	canonical	TATTT(A*)T	A	123276566	-32	expected	7	3	yes	no	yes	0,0,(7)	0,0,(3)	0,0,(7)	0,0,(3)	SRR545694(7;3),
chr12	123338561	+	canonical	GGCTC(A*)C	A	123338589	-28	expected	5	1	yes	no	yes	0,0,(5)	0,0,(1)	0,0,(5)	0,0,(1)	SRR545685(5;1),
chr12	123344297	+	canonical	AGCTC(A*)C	A	123344318	-21	expected	1	1	yes	no	yes	0,0,(1)	0,0,(1)	0,0,(1)	0,0,(1)	SRR317045(1;1),
chr12	123880865	+	canonical	TATTT(A*)T	A	123880891	-26	expected	1	1	no	no	yes	0,1,(0)	0,1,(0)	0,0,(0)	0,0,(0)	SRR315311(1;1),
chr12	124091951	+	canonical	TGCTG(A*)C	A	124091978	-27	expected	1	1	no	no	yes	1,0,(0)	1,0,(0)	0,0,(0)	0,0,(0)	SRR534318(1;1),
chr12	124101029	+	canonical	TCCTT(A*)C	A	124101057	-28	expected	1	1	no	no	yes	1,0,(0)	1,0,(0)	0,0,(0)	0,0,(0)	SRR315310(1;1),
chr12	124102282	+	canonical	TACCC(A*)T	A	124102304	-22	expected	2	2	no	yes	yes	0,2,(0)	0,2,(0)	0,0,(0)	0,0,(0)	SRR317035(1;1),SRR534325(1;1),
chr12	131359069	+	canonical	TACTA(A*)T	A	131359090	-21	expected	1	1	yes	no	yes	0,0,(1)	0,0,(1)	0,0,(1)	0,0,(1)	SRR315306(1;1),
chr12	132198595	+	canonical	TATTG(A*)C	A	132198615	-20	expected	1	1	yes	no	yes	0,0,(1)	0,0,(1)	0,0,(1)	0,0,(1)	SRR317042(1;1),
chr12	132396463	+	canonical	TGCTC(A*)C	A	132396486	-23	expected	1	1	yes	no	yes	0,0,(1)	0,0,(1)	0,0,(1)	0,0,(1)	SRR317064(1;1),
chr12	132399609	+	canonical	TCCTA(A*)T	A	132399627	-18	expected	5	2	yes	yes	yes	0,4,(1)	0,1,(1)	0,4,(1)	0,1,(1)	SRR545701(1;1),SRR545686(4;1),
chr12	132514221	+	canonical	TGGTG(A*)C	A	132514245	-24	expected	16	9	yes	yes	yes	0,1,(15)	0,1,(8)	0,0,(15)	0,0,(8)	SRR317049(4;2),SRR545720(1;1),SRR317051(1;1),SRR545718(4;2),SRR317048(4;1),SRR545687(1;1),SRR307914(1;1),
chr12	132530242	+	canonical	TATTC(A*)C	A	132530271	-29	expected	3	1	yes	no	yes	0,0,(3)	0,0,(1)	0,0,(3)	0,0,(1)	SRR317063(3;1),
chr12	132551882	+	canonical	TGCTG(A*)C	A	132551906	-24	expected	24	8	yes	yes	yes	23,0,(1)	7,0,(1)	0,0,(1)	0,0,(1)	SRR545714(3;1),SRR545691(1;1),SRR307923(1;1),SRR545717(1;1),SRR545711(15;2),SRR545685(2;1),SRR317043(1;1),
chr12	132632160	+	canonical	TGCTC(A*)C	A	132632177	-17	expected	1	1	yes	no	yes	0,0,(1)	0,0,(1)	0,0,(1)	0,0,(1)	SRR317043(1;1),
chr13	21358081	-	canonical	TACTT(G*)T	G	21358058	-23	expected	1	1	yes	no	yes	0,0,(1)	0,0,(1)	0,0,(1)	0,0,(1)	SRR545691(1;1),
chr13	23930168	-	canonical	TGATC(A*)T	A	23930146	-22	expected	10	3	yes	yes	yes	0,0,(10)	0,0,(3)	0,0,(8)	0,0,(2)	SRR545706(1;1),SRR534335(2;1),SRR545711(7;1),
chr13	23945332	-	canonical	TGCTT(T*)T	T	23945304	-28	expected	1	1	no	no	yes	0,1,(0)	0,1,(0)	0,0,(0)	0,0,(0)	SRR317043(1;1),
chr13	25075270	-	canonical	TTCTG(A*)T	A	25074520	-750	distal	1	1	no	no	yes	0,1,(0)	0,1,(0)	0,0,(0)	0,0,(0)	SRR534335(1;1),
chr13	30088746	-	canonical	TGTTC(A*)C	A	30088720	-26	expected	3	1	yes	no	yes	0,0,(3)	0,0,(1)	0,0,(3)	0,0,(1)	SRR545694(3;1),
chr13	30097641	-	canonical	CGCTG(A*)C	A	30097625	-16	expected	4	3	yes	yes	yes	2,0,(2)	2,0,(1)	0,0,(2)	0,0,(1)	SRR317044(1;1),SRR307913(2;1),SRR317049(1;1),
chr13	31711681	-	canonical	TGATA(A*)C	A	31711661	-20	expected	1	1	yes	no	yes	0,0,(1)	0,0,(1)	0,0,(1)	0,0,(1)	SRR545703(1;1),
chr13	32981499	-	canonical	TGTTC(A*)C	A	32981475	-24	expected	3	3	yes	yes	yes	1,0,(2)	1,0,(2)	0,0,(2)	0,0,(2)	SRR545708(1;1),SRR317044(1;1),SRR545706(1;1),
chr13	33692424	-	canonical	GGCTG(A*)C	A	33692400	-24	expected	1	1	no	no	yes	1,0,(0)	1,0,(0)	0,0,(0)	0,0,(0)	SRR317055(1;1),
chr13	36900868	-	canonical	TACTA(A*)C	A	36900835	-33	expected	2	1	no	no	yes	0,2,(0)	0,1,(0)	0,0,(0)	0,0,(0)	SRR545705(2;1),
chr13	38164687	-	canonical	TACTG(A*)T	A	38164666	-21	expected	1	1	no	no	yes	1,0,(0)	1,0,(0)	0,0,(0)	0,0,(0)	SRR545692(1;1),
chr13	42179436	-	canonical	TGTTA(A*)C	A	42179412	-24	expected	1	1	yes	no	yes	0,0,(1)	0,0,(1)	0,0,(1)	0,0,(1)	SRR317043(1;1),
chr13	43544834	-	canonical	TGGTA(A*)T	A	43544806	-28	expected	1	1	yes	no	yes	0,0,(1)	0,0,(1)	0,0,(1)	0,0,(1)	SRR315317(1;1),
chr13	44433078	-	canonical	TATTG(A*)T	A	44433033	-45	expected	1	1	yes	no	yes	0,0,(1)	0,0,(1)	0,0,(1)	0,0,(1)	SRR545706(1;1),
chr13	46542194	-	canonical	TGCTA(A*)T	A	46542163	-31	expected	9	4	yes	yes	yes	2,0,(7)	1,0,(3)	0,0,(7)	0,0,(3)	SRR534318(2;1),SRR545707(3;2),SRR545706(4;1),
chr13	46616462	-	canonical	TACAG(A*)T	A	46616410	-52	expected	1	1	no	no	yes	0,0,(1)	0,0,(1)	0,0,(0)	0,0,(0)	SRR545690(1;1),
chr13	46626156	-	canonical	TACTT(G*)T	G	46619651	-6505	distal	6	1	yes	no	yes	0,0,(6)	0,0,(1)	0,0,(6)	0,0,(1)	SRR534318(6;1),
chr13	52516723	-	canonical	GGCTT(A*)C	A	52516690	-33	expected	1	1	yes	no	yes	0,0,(1)	0,0,(1)	0,0,(1)	0,0,(1)	SRR317049(1;1),
chr13	60584834	-	canonical	TTCTA(A*)C	A	60584803	-31	expected	1	1	no	no	yes	1,0,(0)	1,0,(0)	0,0,(0)	0,0,(0)	SRR317050(1;1),
chr13	73352551	-	canonical	TACTG(A*)T	A	73352518	-33	expected	1	1	no	no	yes	1,0,(0)	1,0,(0)	0,0,(0)	0,0,(0)	SRR545706(1;1),
chr13	77655802	-	canonical	TACTT(A*)T	A	77655786	-16	expected	1	1	no	no	yes	0,1,(0)	0,1,(0)	0,0,(0)	0,0,(0)	SRR317050(1;1),
chr13	77657353	-	canonical	AACTG(A*)T	A	77657327	-26	expected	1	1	no	no	yes	1,0,(0)	1,0,(0)	0,0,(0)	0,0,(0)	SRR545687(1;1),
chr13	77752113	-	canonical	TACTG(A*)T	A	77752089	-24	expected	2	2	no	yes	yes	2,0,(0)	2,0,(0)	0,0,(0)	0,0,(0)	SRR534325(1;1),SRR315309(1;1),
chr13	77764504	-	canonical	TGATC(A*)T	A	77764470	-34	expected	1	1	yes	no	yes	0,0,(1)	0,0,(1)	0,0,(1)	0,0,(1)	SRR317051(1;1),
chr13	77765967	-	canonical	TTTTG(A*)C	A	77765948	-19	expected	1	1	yes	no	yes	0,1,(0)	0,1,(0)	0,1,(0)	0,1,(0)	SRR534326(1;1),
chr13	77836281	-	canonical	TATTT(A*)T	A	77836264	-17	expected	6	3	yes	yes	yes	0,0,(6)	0,0,(3)	0,0,(5)	0,0,(2)	SRR545713(3;1),SRR534326(3;2),
chr13	95724134	-	canonical	TCCTA(A*)C	A	95724107	-27	expected	1	1	yes	no	yes	0,0,(1)	0,0,(1)	0,0,(1)	0,0,(1)	SRR307921(1;1),
chr13	95726610	-	canonical	TACTT(A*)T	A	95726578	-32	expected	5	3	yes	yes	yes	0,0,(5)	0,0,(3)	0,0,(5)	0,0,(3)	SRR307930(1;1),SRR307922(3;1),SRR534318(1;1),
chr13	95899371	-	canonical	TATTT(A*)C	A	95899349	-22	expected	3	2	yes	yes	yes	1,0,(2)	1,0,(1)	0,0,(2)	0,0,(1)	SRR317043(1;1),SRR317064(2;1),
chr13	96242206	-	canonical	GACTC(A*)T	A	96242186	-20	expected	4	2	yes	yes	yes	0,0,(4)	0,0,(2)	0,0,(1)	0,0,(1)	SRR545691(1;1),SRR545709(3;1),
chr13	96263746	-	canonical	TGCAG(A*)T	A	96261767	-1979	distal	1	1	no	no	yes	0,0,(1)	0,0,(1)	0,0,(0)	0,0,(0)	SRR534317(1;1),
chr13	96296413	-	canonical	TGCTG(G*)T	G	96295952	-461	distal	2	1	no	no	yes	0,2,(0)	0,1,(0)	0,0,(0)	0,0,(0)	SRR545693(2;1),
chr13	96513166	-	canonical	TGTTT(A*)A	A	96513137	-29	expected	2	1	yes	no	yes	0,0,(2)	0,0,(1)	0,0,(2)	0,0,(1)	SRR545703(2;1),
chr13	99519813	-	canonical	TATTT(A*)T	A	99519790	-23	expected	1	1	yes	no	yes	0,0,(1)	0,0,(1)	0,0,(1)	0,0,(1)	SRR534317(1;1),
chr13	99554179	-	canonical	TGCTT(A*)C	A	99554154	-25	expected	1	1	yes	no	yes	0,0,(1)	0,0,(1)	0,0,(1)	0,0,(1)	SRR545718(1;1),
chr13	99908182	-	canonical	TTCTT(A*)T	A	99908160	-22	expected	1	1	yes	no	yes	0,0,(1)	0,0,(1)	0,0,(1)	0,0,(1)	SRR545690(1;1),
chr13	110830300	-	canonical	TGTTC(A*)C	A	110830278	-22	expected	2	1	no	no	yes	0,0,(2)	0,0,(1)	0,0,(0)	0,0,(0)	SRR534289(2;1),
chr13	110864990	-	canonical	CACTG(A*)C	A	110864965	-25	expected	103	41	yes	yes	yes	61,15,(27)	24,5,(12)	0,8,(23)	0,3,(9)	SRR317065(2;2),SRR545707(1;1),SRR317069(1;1),SRR534318(34;8),SRR545719(9;4),SRR315317(1;1),SRR545721(8;1),SRR545718(1;1),SRR315318(4;3),SRR317062(1;1),SRR317064(4;4),SRR545686(5;1),SRR317039(1;1),SRR545691(1;1),SRR545693(3;1),SRR545720(18;6),SRR545685(8;3),SRR317044(1;1),
chr13	111563156	-	canonical	TACTG(A*)C	A	111563117	-39	expected	9	2	yes	yes	yes	4,0,(5)	1,0,(1)	0,0,(5)	0,0,(1)	SRR545702(4;1),SRR545705(5;1),
chr13	113200211	-	canonical	TGTGG(A*)T	A	113200179	-32	expected	1	1	yes	no	yes	0,0,(1)	0,0,(1)	0,0,(1)	0,0,(1)	SRR534318(1;1),
chr13	113200217	-	canonical	TGTAA(A*)T	A	113200179	-38	expected	7	5	yes	yes	yes	3,4,(0)	2,3,(0)	0,4,(0)	0,3,(0)	SRR545719(2;1),SRR317042(1;1),SRR307931(1;1),SRR317050(1;1),SRR317064(2;1),
chr13	114535485	-	canonical	TGCTG(A*)C	A	114535461	-24	expected	3	1	no	no	yes	3,0,(0)	1,0,(0)	0,0,(0)	0,0,(0)	SRR317065(3;1),
chr13	114793427	-	canonical	TCCTG(A*)C	A	114793403	-24	expected	1	1	no	no	yes	1,0,(0)	1,0,(0)	0,0,(0)	0,0,(0)	SRR317051(1;1),
chr13	114839338	-	canonical	TGCTG(A*)T	A	114839312	-26	expected	1	1	no	no	yes	0,0,(1)	0,0,(1)	0,0,(0)	0,0,(0)	SRR545707(1;1),
chr13	25893439	+	canonical	TTTTT(A*)C	A	25893463	-24	expected	3	3	yes	yes	yes	0,1,(2)	0,1,(2)	0,0,(2)	0,0,(2)	SRR545713(2;2),SRR315309(1;1),
chr13	25901549	+	canonical	TGATA(A*)T	A	25901567	-18	expected	3	1	yes	no	yes	0,0,(3)	0,0,(1)	0,0,(3)	0,0,(1)	SRR545705(3;1),
chr13	27828333	+	canonical	TACTC(A*)C	A	27828356	-23	expected	4	2	yes	yes	yes	0,0,(4)	0,0,(2)	0,0,(4)	0,0,(2)	SRR545701(2;1),SRR315309(2;1),
chr13	37582169	+	canonical	TACTT(A*)C	A	37582193	-24	expected	6	2	yes	yes	yes	0,0,(6)	0,0,(2)	0,0,(6)	0,0,(2)	SRR545712(3;1),SRR545719(3;1),
chr13	41892917	+	canonical	TGTAA(A*)T	A	41892941	-24	expected	1	1	yes	no	yes	1,0,(0)	1,0,(0)	1,0,(0)	1,0,(0)	SRR317042(1;1),
chr13	41932417	+	canonical	TAATA(A*)T	A	41932439	-22	expected	3	1	yes	no	yes	0,0,(3)	0,0,(1)	0,0,(3)	0,0,(1)	SRR545703(3;1),
chr13	42729788	+	canonical	TCCTC(A*)C	A	42729802	-14	expected	4	2	no	yes	yes	1,3,(0)	1,1,(0)	0,0,(0)	0,0,(0)	SRR545688(1;1),SRR545693(3;1),
chr13	46067455	+	canonical	TACTA(A*)T	A	46067481	-26	expected	3	2	yes	yes	yes	0,2,(1)	0,1,(1)	0,0,(1)	0,0,(1)	SRR545708(2;1),SRR545719(1;1),
chr13	47255848	+	canonical	TGTTT(A*)T	A	47255875	-27	expected	2	1	no	no	yes	2,0,(0)	1,0,(0)	0,0,(0)	0,0,(0)	SRR317044(2;1),
chr13	47275209	+	canonical	TATTC(A*)T	A	47275255	-46	expected	4	1	no	no	yes	0,4,(0)	0,1,(0)	0,0,(0)	0,0,(0)	SRR534318(4;1),
chr13	47275235	+	canonical	TTCTT(A*)T	A	47275255	-20	expected	4	1	no	no	yes	0,4,(0)	0,1,(0)	0,0,(0)	0,0,(0)	SRR534326(4;1),
chr13	76393511	+	canonical	TGCTG(A*)T	A	76393528	-17	expected	7	3	no	yes	yes	7,0,(0)	3,0,(0)	0,0,(0)	0,0,(0)	SRR534317(2;1),SRR534327(2;1),SRR545704(3;1),
chr13	76430606	+	canonical	AGCTG(A*)C	A	76430641	-35	expected	2	1	no	no	yes	2,0,(0)	1,0,(0)	0,0,(0)	0,0,(0)	SRR545706(2;1),
chr13	78183165	+	canonical	TATTT(A*)T	A	78183192	-27	expected	1	1	yes	no	yes	0,0,(1)	0,0,(1)	0,0,(1)	0,0,(1)	SRR317046(1;1),
chr13	96415874	+	canonical	TTCTT(A*)T	A	96415896	-22	expected	3	1	yes	no	yes	0,0,(3)	0,0,(1)	0,0,(3)	0,0,(1)	SRR545718(3;1),
chr13	99100465	+	canonical	GGTTG(A*)C	A	99100489	-24	expected	2	1	yes	no	yes	0,0,(2)	0,0,(1)	0,0,(2)	0,0,(1)	SRR545692(2;1),
chr13	100207760	+	canonical	TATTT(A*)T	A	100207789	-29	expected	8	3	no	yes	yes	6,0,(2)	1,0,(2)	0,0,(0)	0,0,(0)	SRR534326(6;1),SRR317042(1;1),SRR545723(1;1),
chr13	103290565	+	canonical	TATTG(A*)C	A	103290588	-23	expected	6	2	yes	yes	yes	0,0,(6)	0,0,(2)	0,0,(6)	0,0,(2)	SRR545719(2;1),SRR545705(4;1),
chr13	103459472	+	canonical	TGTTG(A*)T	A	103459495	-23	expected	2	2	no	yes	yes	1,1,(0)	1,1,(0)	0,0,(0)	0,0,(0)	SRR315303(1;1),SRR534318(1;1),
chr13	111099115	+	canonical	TTCTC(A*)C	A	111099144	-29	expected	1	1	yes	no	yes	0,0,(1)	0,0,(1)	0,0,(1)	0,0,(1)	SRR317065(1;1),
chr13	111289447	+	canonical	TGCTG(A*)C	A	111289475	-28	expected	5	3	yes	yes	yes	2,0,(3)	2,0,(1)	0,0,(3)	0,0,(1)	SRR545721(3;1),SRR545717(1;1),SRR307914(1;1),
chr13	111926127	+	canonical	TGCTA(A*)C	A	111926160	-33	expected	1	1	yes	no	yes	0,0,(1)	0,0,(1)	0,0,(1)	0,0,(1)	SRR545718(1;1),
chr13	111938470	+	canonical	TGTTA(G*)C	G	111938493	-23	expected	4	2	yes	yes	yes	0,2,(2)	0,1,(1)	0,2,(2)	0,1,(1)	SRR534318(2;1),SRR545694(2;1),
chr13	113510207	+	canonical	TTCTG(A*)C	A	113510224	-17	expected	4	4	yes	yes	yes	0,0,(4)	0,0,(4)	0,0,(4)	0,0,(4)	SRR317054(2;2),SRR315312(1;1),SRR545704(1;1),
chr13	113742612	+	canonical	TACTC(A*)C	A	113742640	-28	expected	2	2	yes	yes	yes	0,1,(1)	0,1,(1)	0,0,(1)	0,0,(1)	SRR317040(1;1),SRR307923(1;1),
chr13	113889351	+	canonical	TACTG(A*)T	A	113889376	-25	expected	6	4	yes	yes	yes	5,0,(1)	3,0,(1)	0,0,(1)	0,0,(1)	SRR317051(2;1),SRR545718(1;1),SRR315317(2;1),SRR545688(1;1),
chr13	113898703	+	canonical	TATTT(A*)C	A	113898723	-20	expected	8	3	yes	yes	yes	0,1,(7)	0,1,(2)	0,0,(7)	0,0,(2)	SRR545719(4;1),SRR545718(1;1),SRR545714(3;1),
chr13	114288826	+	canonical	TCTTC(A*)C	A	114288848	-22	expected	1	1	yes	no	yes	0,0,(1)	0,0,(1)	0,0,(1)	0,0,(1)	SRR317055(1;1),
chr13	115067185	+	canonical	TGCTG(A*)T	A	115067205	-20	expected	2	1	no	no	yes	2,0,(0)	1,0,(0)	0,0,(0)	0,0,(0)	SRR307931(2;1),
chr14	20794971	-	canonical	TATTT(A*)T	A	20794952	-19	expected	2	1	yes	no	yes	0,0,(2)	0,0,(1)	0,0,(2)	0,0,(1)	SRR545685(2;1),
chr14	20857488	-	canonical	TGTTT(G*)T	G	20857456	-32	expected	12	2	no	yes	yes	0,12,(0)	0,2,(0)	0,0,(0)	0,0,(0)	SRR545715(9;1),SRR545685(3;1),
chr14	20873770	-	canonical	TTCTC(A*)T	A	20873744	-26	expected	1	1	yes	no	yes	0,0,(1)	0,0,(1)	0,0,(1)	0,0,(1)	SRR545704(1;1),
chr14	20928476	-	canonical	TGCTG(A*)T	A	20928457	-19	expected	1	1	no	no	yes	1,0,(0)	1,0,(0)	0,0,(0)	0,0,(0)	SRR317062(1;1),
chr14	21702414	-	canonical	TGTTC(A*)C	A	21702388	-26	expected	2	2	yes	yes	yes	0,0,(2)	0,0,(2)	0,0,(2)	0,0,(2)	SRR545687(1;1),SRR545688(1;1),
chr14	21821000	-	canonical	TGCTA(A*)C	A	21820977	-23	expected	1	1	yes	no	yes	0,1,(0)	0,1,(0)	0,1,(0)	0,1,(0)	SRR545701(1;1),
chr14	21833323	-	canonical	TGCTG(A*)T	A	21833302	-21	expected	1	1	no	no	yes	1,0,(0)	1,0,(0)	0,0,(0)	0,0,(0)	SRR545688(1;1),
chr14	21861438	-	canonical	TTCTC(A*)C	A	21861413	-25	expected	2	2	yes	yes	yes	0,0,(2)	0,0,(2)	0,0,(1)	0,0,(1)	SRR307913(1;1),SRR317050(1;1),
chr14	21899183	-	canonical	TGCTA(A*)C	A	21897494	-1689	distal	6	1	yes	no	yes	0,0,(6)	0,0,(1)	0,0,(6)	0,0,(1)	SRR545686(6;1),
chr14	21967972	-	canonical	TACAA(A*)T	A	21967946	-26	expected	5	2	yes	yes	yes	4,1,(0)	1,1,(0)	4,1,(0)	1,1,(0)	SRR545718(4;1),SRR545694(1;1),
chr14	23424423	-	canonical	TGTTT(A*)T	A	23424385	-38	expected	1	1	yes	no	yes	0,0,(1)	0,0,(1)	0,0,(1)	0,0,(1)	SRR315317(1;1),
chr14	23829514	-	canonical	TCCTG(A*)C	A	23829490	-24	expected	2	1	yes	no	yes	0,0,(2)	0,0,(1)	0,0,(2)	0,0,(1)	SRR545704(2;1),
chr14	24615494	-	canonical	TTTTG(A*)C	A	24615449	-45	expected	1	1	no	no	yes	0,1,(0)	0,1,(0)	0,0,(0)	0,0,(0)	SRR317051(1;1),
chr14	24711009	-	canonical	TGCTA(A*)C	A	24710982	-27	expected	2	1	yes	no	yes	0,2,(0)	0,1,(0)	0,2,(0)	0,1,(0)	SRR534317(2;1),
chr14	24735761	-	canonical	GGCTG(A*)C	A	24735723	-38	expected	3	1	no	no	yes	3,0,(0)	1,0,(0)	0,0,(0)	0,0,(0)	SRR317063(3;1),
chr14	31642667	-	canonical	TGCTA(A*)T	A	31642632	-35	expected	3	2	yes	no	yes	0,3,(0)	0,2,(0)	0,3,(0)	0,2,(0)	SRR545717(3;2),
chr14	31855810	-	canonical	TGGTT(A*)T	A	31855781	-29	expected	1	1	yes	no	yes	0,0,(1)	0,0,(1)	0,0,(1)	0,0,(1)	SRR315310(1;1),
chr14	35074939	-	canonical	TAGTC(A*)T	A	35074923	-16	expected	1	1	no	no	yes	0,0,(1)	0,0,(1)	0,0,(0)	0,0,(0)	SRR545707(1;1),
chr14	35872594	-	canonical	GGCTT(A*)C	A	35872566	-28	expected	68	46	yes	yes	yes	0,15,(53)	0,8,(38)	0,0,(51)	0,0,(36)	SRR317050(7;5),SRR307913(3;2),SRR317045(1;1),SRR307921(5;5),SRR317051(3;3),SRR534331(4;2),SRR545690(11;7),SRR534332(5;3),SRR545712(4;1),SRR317062(1;1),SRR545708(6;2),SRR545706(3;1),SRR545718(1;1),SRR534325(1;1),SRR534333(7;6),SRR545689(1;1),SRR534317(1;1),SRR534312(1;1),SRR317048(1;1),SRR317066(2;1),
chr14	36155893	-	canonical	TATAT(A*)T	A	36155872	-21	expected	1	1	yes	no	yes	1,0,(0)	1,0,(0)	1,0,(0)	1,0,(0)	SRR534317(1;1),
chr14	50769527	-	canonical	TGTTA(G*)T	G	50768886	-641	distal	1	1	no	no	yes	0,0,(1)	0,0,(1)	0,0,(0)	0,0,(0)	SRR317050(1;1),
chr14	50943056	-	canonical	TGCTG(A*)T	A	50943024	-32	expected	5	2	no	yes	yes	5,0,(0)	2,0,(0)	0,0,(0)	0,0,(0)	SRR545694(4;1),SRR534325(1;1),
chr14	51237307	-	canonical	TGATG(G*)C	G	51237280	-27	expected	2	1	no	no	yes	0,2,(0)	0,1,(0)	0,0,(0)	0,0,(0)	SRR545691(2;1),
chr14	53247486	-	canonical	TGCTT(A*)C	A	53247458	-28	expected	2	1	yes	no	yes	0,0,(2)	0,0,(1)	0,0,(2)	0,0,(1)	SRR545693(2;1),
chr14	54948939	-	canonical	TACTC(A*)T	A	54948920	-19	expected	9	7	yes	yes	yes	0,0,(9)	0,0,(7)	0,0,(9)	0,0,(7)	SRR545716(3;1),SRR545688(1;1),SRR534312(1;1),SRR317054(1;1),SRR315317(1;1),SRR545701(1;1),SRR545704(1;1),
chr14	55422438	-	canonical	TGTTA(T*)T	T	55422412	-26	expected	1	1	yes	no	yes	0,0,(1)	0,0,(1)	0,0,(1)	0,0,(1)	SRR317051(1;1),
chr14	55429065	-	canonical	TGTTT(G*)T	G	55424353	-4712	distal	1	1	no	no	yes	0,1,(0)	0,1,(0)	0,0,(0)	0,0,(0)	SRR315305(1;1),
chr14	61180942	-	canonical	TGATA(A*)T	A	61180921	-21	expected	2	1	yes	no	yes	0,0,(2)	0,0,(1)	0,0,(2)	0,0,(1)	SRR317064(2;1),
chr14	68126658	-	canonical	TGCTC(A*)C	A	68126639	-19	expected	1	1	yes	no	yes	0,0,(1)	0,0,(1)	0,0,(1)	0,0,(1)	SRR307921(1;1),
chr14	68264507	-	canonical	TGATC(A*)C	A	68264472	-35	expected	6	4	yes	yes	yes	0,0,(6)	0,0,(4)	0,0,(6)	0,0,(4)	SRR545704(2;1),SRR317062(1;1),SRR307923(2;1),SRR545716(1;1),
chr14	69257233	-	canonical	TCCTT(A*)C	A	69257209	-24	expected	12	1	yes	no	yes	0,0,(12)	0,0,(1)	0,0,(12)	0,0,(1)	SRR545712(12;1),
chr14	69346847	-	canonical	TGCTG(A*)C	A	69346825	-22	expected	1	1	no	no	yes	1,0,(0)	1,0,(0)	0,0,(0)	0,0,(0)	SRR317047(1;1),
chr14	69351050	-	canonical	TACTA(A*)C	A	69351025	-25	expected	3	1	no	no	yes	3,0,(0)	1,0,(0)	0,0,(0)	0,0,(0)	SRR317045(3;1),
chr14	71051721	-	canonical	TATTA(A*)C	A	71051660	-61	distal	1	1	yes	no	yes	0,0,(1)	0,0,(1)	0,0,(1)	0,0,(1)	SRR317044(1;1),
chr14	74974816	-	canonical	TGCTG(A*)C	A	74974798	-18	expected	15	7	yes	yes	yes	11,0,(4)	5,0,(2)	1,0,(4)	1,0,(2)	SRR545720(2;1),SRR534318(5;2),SRR534289(1;1),SRR545707(5;1),SRR534335(2;2),
chr14	74999269	-	canonical	TGGTC(A*)T	A	74999251	-18	expected	1	1	yes	no	yes	0,0,(1)	0,0,(1)	0,0,(1)	0,0,(1)	SRR545717(1;1),
chr14	75016694	-	canonical	TGGTC(A*)C	A	75016668	-26	expected	5	2	yes	yes	yes	0,0,(5)	0,0,(2)	0,0,(3)	0,0,(1)	SRR545707(2;1),SRR534334(3;1),
chr14	75570734	-	canonical	TATAT(A*)T	A	75570700	-34	expected	1	1	yes	no	yes	0,0,(1)	0,0,(1)	0,0,(1)	0,0,(1)	SRR317038(1;1),
chr14	75601731	-	canonical	TGTTT(A*)C	A	75601709	-22	expected	4	3	yes	yes	yes	2,0,(2)	1,0,(2)	0,0,(2)	0,0,(2)	SRR545692(1;1),SRR545691(1;1),SRR545702(2;1),
chr14	77772811	-	canonical	TTCTC(A*)T	A	77772784	-27	expected	3	2	yes	yes	yes	0,0,(3)	0,0,(2)	0,0,(3)	0,0,(2)	SRR317045(2;1),SRR317050(1;1),
chr14	78184906	-	canonical	TGTTT(A*)C	A	78184873	-33	expected	2	1	yes	no	yes	0,0,(2)	0,0,(1)	0,0,(2)	0,0,(1)	SRR545687(2;1),
chr14	78203447	-	canonical	TAATT(A*)C	A	78203418	-29	expected	3	1	yes	no	yes	0,0,(3)	0,0,(1)	0,0,(3)	0,0,(1)	SRR545719(3;1),
chr14	81662611	-	canonical	TGATA(A*)C	A	81662585	-26	expected	2	1	no	no	yes	0,2,(0)	0,1,(0)	0,0,(0)	0,0,(0)	SRR317039(2;1),
chr14	81954309	-	canonical	TTCTC(A*)T	A	81954286	-23	expected	3	1	no	no	yes	0,0,(3)	0,0,(1)	0,0,(0)	0,0,(0)	SRR534325(3;1),
chr14	81964856	-	canonical	TCCTC(A*)C	A	81964838	-18	expected	1	1	no	no	yes	0,0,(1)	0,0,(1)	0,0,(0)	0,0,(0)	SRR545690(1;1),
chr14	81969255	-	canonical	TACTA(A*)T	A	81969227	-28	expected	2	1	no	no	yes	0,0,(2)	0,0,(1)	0,0,(0)	0,0,(0)	SRR545713(2;1),
chr14	91927969	-	canonical	TATTG(A*)C	A	91927951	-18	expected	2	2	no	yes	yes	0,2,(0)	0,2,(0)	0,0,(0)	0,0,(0)	SRR545690(1;1),SRR545689(1;1),
chr14	93712668	-	canonical	TGCTA(A*)T	A	93712632	-36	expected	3	2	yes	yes	yes	0,2,(1)	0,1,(1)	0,2,(1)	0,1,(1)	SRR317042(1;1),SRR545704(2;1),
chr14	94526989	-	canonical	TGCTG(A*)C	A	94526959	-30	expected	2	2	no	no	yes	2,0,(0)	2,0,(0)	0,0,(0)	0,0,(0)	SRR534325(2;2),
chr14	95596546	-	canonical	TACTG(A*)T	A	95596529	-17	expected	8	2	no	yes	yes	3,0,(5)	1,0,(1)	0,0,(0)	0,0,(0)	SRR545690(8;2),
chr14	95598001	-	canonical	TATTT(A*)C	A	95597976	-25	expected	9	3	yes	yes	yes	0,0,(9)	0,0,(3)	0,0,(1)	0,0,(1)	SRR534312(1;1),SRR545715(8;2),
chr14	95663058	-	canonical	TACTG(A*)C	A	95663031	-27	expected	2	1	no	no	yes	2,0,(0)	1,0,(0)	0,0,(0)	0,0,(0)	SRR317044(2;1),
chr14	95670873	-	canonical	TACTC(A*)T	A	95670800	-73	distal	2	1	yes	no	yes	0,0,(2)	0,0,(1)	0,0,(2)	0,0,(1)	SRR545690(2;1),
chr14	102548798	-	canonical	TAGTC(A*)T	A	102548781	-17	expected	8	5	yes	yes	yes	1,0,(7)	1,0,(4)	0,0,(2)	0,0,(2)	SRR317049(1;1),SRR534325(3;1),SRR545690(1;1),SRR317051(2;1),SRR545687(1;1),
chr14	103404769	-	canonical	TGCTC(A*)C	A	103404748	-21	expected	1	1	yes	no	yes	0,0,(1)	0,0,(1)	0,0,(1)	0,0,(1)	SRR307931(1;1),
chr14	103436623	-	canonical	TGTTA(A*)T	A	103436598	-25	expected	5	3	yes	yes	yes	1,0,(4)	1,0,(2)	0,0,(1)	0,0,(1)	SRR317049(1;1),SRR545691(1;1),SRR545719(3;1),
chr14	103444547	-	canonical	TTCTT(A*)T	A	103444542	-5	proximal	2	1	yes	no	yes	0,0,(2)	0,0,(1)	0,0,(2)	0,0,(1)	SRR534335(2;1),
chr14	105237212	-	canonical	AGCTC(A*)T	A	105237184	-28	expected	14	4	yes	yes	yes	0,0,(14)	0,0,(4)	0,0,(14)	0,0,(4)	SRR317059(1;1),SRR317057(5;1),SRR545685(7;1),SRR534317(1;1),
chr14	105684167	-	canonical	GACTC(A*)C	A	105684137	-30	expected	1	1	yes	no	yes	0,0,(1)	0,0,(1)	0,0,(1)	0,0,(1)	SRR534318(1;1),
chr14	23311582	+	canonical	TCCTA(A*)C	A	23311618	-36	expected	8	2	yes	yes	yes	0,2,(6)	0,1,(1)	0,0,(6)	0,0,(1)	SRR545716(2;1),SRR534334(6;1),
chr14	24586849	+	canonical	TGCTA(G*)C	G	24586876	-27	expected	4	1	yes	no	yes	0,0,(4)	0,0,(1)	0,0,(4)	0,0,(1)	SRR545706(4;1),
chr14	24631326	+	canonical	TTCTG(A*)T	A	24631352	-26	expected	8	1	yes	no	yes	0,0,(8)	0,0,(1)	0,0,(8)	0,0,(1)	SRR545715(8;1),
chr14	24706705	+	canonical	TATTC(A*)T	A	24706725	-20	expected	1	1	yes	no	yes	0,0,(1)	0,0,(1)	0,0,(1)	0,0,(1)	SRR317042(1;1),
chr14	31346753	+	canonical	TGCTT(A*)C	A	31346777	-24	expected	1	1	no	no	yes	0,1,(0)	0,1,(0)	0,0,(0)	0,0,(0)	SRR317043(1;1),
chr14	35779914	+	canonical	TTCTA(A*)C	A	35779945	-31	expected	3	2	yes	yes	yes	0,1,(2)	0,1,(1)	0,1,(2)	0,1,(1)	SRR545691(1;1),SRR545714(2;1),
chr14	45583354	+	canonical	TGTAT(A*)T	A	45583385	-31	expected	2	1	yes	no	yes	0,0,(2)	0,0,(1)	0,0,(2)	0,0,(1)	SRR545713(2;1),
chr14	52192468	+	canonical	TATTT(A*)T	A	52192496	-28	expected	2	1	no	no	yes	0,0,(2)	0,0,(1)	0,0,(0)	0,0,(0)	SRR545691(2;1),
chr14	53185669	+	canonical	TGCAT(A*)T	A	53185694	-25	expected	7	2	yes	yes	yes	7,0,(0)	2,0,(0)	7,0,(0)	2,0,(0)	SRR545719(6;1),SRR545702(1;1),
chr14	53217363	+	canonical	TATTT(A*)T	A	53217400	-37	expected	3	1	no	no	yes	0,3,(0)	0,1,(0)	0,0,(0)	0,0,(0)	SRR545719(3;1),
chr14	56078692	+	canonical	GACTG(A*)C	A	56078736	-44	expected	3	1	no	no	yes	3,0,(0)	1,0,(0)	0,0,(0)	0,0,(0)	SRR545713(3;1),
chr14	56103136	+	canonical	TGCTA(A*)T	A	56103166	-30	expected	2	1	yes	no	yes	0,0,(2)	0,0,(1)	0,0,(2)	0,0,(1)	SRR545719(2;1),
chr14	56125241	+	canonical	TACTG(A*)T	A	56125263	-22	expected	8	1	no	no	yes	8,0,(0)	1,0,(0)	0,0,(0)	0,0,(0)	SRR534318(8;1),
chr14	57863447	+	canonical	TCTTC(A*)T	A	57863469	-22	expected	6	2	yes	yes	yes	0,0,(6)	0,0,(2)	0,0,(6)	0,0,(2)	SRR317050(2;1),SRR545707(4;1),
chr14	58734163	+	canonical	TTCTG(A*)T	A	58734191	-28	expected	1	1	yes	no	yes	0,0,(1)	0,0,(1)	0,0,(1)	0,0,(1)	SRR317055(1;1),
chr14	58814359	+	canonical	TGTTT(G*)T	G	58814364	-5	proximal	1	1	no	no	yes	0,0,(1)	0,0,(1)	0,0,(0)	0,0,(0)	SRR545690(1;1),
chr14	59814237	+	canonical	TAATA(A*)C	A	59814256	-19	expected	1	1	yes	no	yes	0,0,(1)	0,0,(1)	0,0,(1)	0,0,(1)	SRR545692(1;1),
chr14	60756498	+	canonical	CACTT(A*)C	A	60756523	-25	expected	3	1	no	no	yes	0,3,(0)	0,1,(0)	0,0,(0)	0,0,(0)	SRR545720(3;1),
chr14	61912385	+	canonical	GACTG(A*)T	A	61912409	-24	expected	5	2	no	yes	yes	5,0,(0)	2,0,(0)	0,0,(0)	0,0,(0)	SRR545708(4;1),SRR545687(1;1),
chr14	62203573	+	canonical	TGCTC(A*)T	A	62203606	-33	expected	1	1	yes	no	yes	0,0,(1)	0,0,(1)	0,0,(1)	0,0,(1)	SRR315317(1;1),
chr14	62211400	+	canonical	TTTTC(A*)T	A	62211422	-22	expected	5	4	yes	yes	yes	0,0,(5)	0,0,(4)	0,0,(1)	0,0,(1)	SRR534326(1;1),SRR534318(1;1),SRR545686(3;2),
chr14	64908751	+	canonical	AGCTC(A*)C	A	64908771	-20	expected	3	2	yes	yes	yes	0,0,(3)	0,0,(2)	0,0,(2)	0,0,(1)	SRR534318(2;1),SRR545691(1;1),
chr14	65195695	+	canonical	TTCTG(A*)C	A	65195713	-18	expected	2	1	yes	no	yes	0,0,(2)	0,0,(1)	0,0,(2)	0,0,(1)	SRR545720(2;1),
chr14	65499040	+	canonical	TTTTG(A*)C	A	65499076	-36	expected	1	1	no	no	yes	1,0,(0)	1,0,(0)	0,0,(0)	0,0,(0)	SRR315311(1;1),
chr14	69921495	+	canonical	TGTTT(A*)T	A	69921528	-33	expected	12	3	yes	yes	yes	0,1,(11)	0,1,(2)	0,0,(4)	0,0,(1)	SRR545708(1;1),SRR545719(7;1),SRR545720(4;1),
chr14	70177671	+	canonical	TGCAG(A*)T	A	70232830	-55159	distal	1	1	no	no	yes	0,0,(1)	0,0,(1)	0,0,(0)	0,0,(0)	SRR307922(1;1),
chr14	72137806	+	canonical	TACTG(A*)C	A	72137835	-29	expected	1	1	no	no	yes	1,0,(0)	1,0,(0)	0,0,(0)	0,0,(0)	SRR317036(1;1),
chr14	73566347	+	canonical	TATTC(A*)T	A	73566374	-27	expected	2	2	yes	no	yes	0,0,(2)	0,0,(2)	0,0,(2)	0,0,(2)	SRR307930(2;2),
chr14	74343689	+	canonical	TATAT(A*)T	A	74343700	-11	expected	1	1	no	no	yes	1,0,(0)	1,0,(0)	0,0,(0)	0,0,(0)	SRR545707(1;1),
chr14	74422138	+	canonical	TATAG(A*)T	A	74422153	-15	expected	5	2	yes	yes	yes	5,0,(0)	2,0,(0)	1,0,(0)	1,0,(0)	SRR545721(4;1),SRR315310(1;1),
chr14	75935966	+	canonical	AACTC(A*)C	A	75935992	-26	expected	5	3	yes	yes	yes	0,0,(5)	0,0,(3)	0,0,(3)	0,0,(2)	SRR317064(2;1),SRR317049(3;2),
chr14	76231566	+	canonical	TACTG(A*)T	A	76232404	-838	distal	1	1	no	no	yes	1,0,(0)	1,0,(0)	0,0,(0)	0,0,(0)	SRR545707(1;1),
chr14	77928958	+	canonical	TATTT(A*)C	A	77928984	-26	expected	1	1	yes	no	yes	0,0,(1)	0,0,(1)	0,0,(1)	0,0,(1)	SRR307914(1;1),
chr14	89341330	+	canonical	TGTTC(A*)T	A	89341369	-39	expected	1	1	yes	no	yes	0,0,(1)	0,0,(1)	0,0,(1)	0,0,(1)	SRR317044(1;1),
chr14	90735714	+	canonical	TCTTC(A*)T	A	90735740	-26	expected	1	1	yes	no	yes	0,0,(1)	0,0,(1)	0,0,(1)	0,0,(1)	SRR317036(1;1),
chr14	92622803	+	canonical	TTCTA(A*)T	A	92622822	-19	expected	1	1	yes	no	yes	0,0,(1)	0,0,(1)	0,0,(1)	0,0,(1)	SRR545687(1;1),
chr14	93142791	+	canonical	AACTC(A*)T	A	93142819	-28	expected	3	1	yes	no	yes	0,0,(3)	0,0,(1)	0,0,(3)	0,0,(1)	SRR317063(3;1),
chr14	94725087	+	canonical	TAATT(A*)C	A	94725119	-32	expected	1	1	yes	no	yes	0,0,(1)	0,0,(1)	0,0,(1)	0,0,(1)	SRR317054(1;1),
chr14	97009089	+	canonical	TGTTA(A*)T	A	97009110	-21	expected	3	1	no	no	yes	0,0,(3)	0,0,(1)	0,0,(0)	0,0,(0)	SRR534334(3;1),
chr14	97319143	+	canonical	TGTTC(A*)T	A	97319167	-24	expected	7	1	yes	no	yes	0,0,(7)	0,0,(1)	0,0,(7)	0,0,(1)	SRR545711(7;1),
chr14	100996134	+	canonical	TGCTC(A*)C	A	100996156	-22	expected	4	2	no	no	yes	4,0,(0)	2,0,(0)	0,0,(0)	0,0,(0)	SRR534326(4;2),
chr14	102477054	+	canonical	TGCTC(A*)C	A	102477076	-22	expected	5	2	yes	no	yes	0,0,(5)	0,0,(2)	0,0,(5)	0,0,(2)	SRR545714(5;2),
chr14	102483081	+	canonical	GACTC(A*)C	A	102483102	-21	expected	17	10	yes	yes	yes	0,1,(16)	0,1,(9)	0,0,(16)	0,0,(9)	SRR317050(2;2),SRR545715(5;2),SRR545717(1;1),SRR545719(5;2),SRR317042(1;1),SRR545707(3;2),
chr14	102493555	+	canonical	TGTTA(G*)T	G	102493719	-164	distal	1	1	no	no	yes	0,1,(0)	0,1,(0)	0,0,(0)	0,0,(0)	SRR545687(1;1),
chr14	102516375	+	canonical	TGTTC(A*)C	A	102516407	-32	expected	1	1	yes	no	yes	0,1,(0)	0,1,(0)	0,1,(0)	0,1,(0)	SRR317042(1;1),
chr14	102912115	+	canonical	TGCTG(A*)C	A	102912142	-27	expected	1	1	yes	no	yes	0,0,(1)	0,0,(1)	0,0,(1)	0,0,(1)	SRR307923(1;1),
chr14	103593322	+	canonical	GGCTG(A*)C	A	103593341	-19	expected	16	1	no	no	yes	16,0,(0)	1,0,(0)	0,0,(0)	0,0,(0)	SRR545712(16;1),
chr14	103601535	+	canonical	GGCTG(A*)C	A	103601555	-20	expected	1	1	no	no	yes	1,0,(0)	1,0,(0)	0,0,(0)	0,0,(0)	SRR545708(1;1),
chr14	103805954	+	canonical	TGTTA(A*)C	A	103805975	-21	expected	5	1	no	no	yes	5,0,(0)	1,0,(0)	0,0,(0)	0,0,(0)	SRR545703(5;1),
chr14	103932658	+	canonical	TGCTA(A*)T	A	103932679	-21	expected	7	3	yes	yes	yes	3,0,(4)	1,0,(2)	0,0,(4)	0,0,(2)	SRR545717(1;1),SRR534318(3;1),SRR545702(3;1),
chr14	103996263	+	canonical	TGCTC(A*)T	A	103996286	-23	expected	1	1	yes	no	yes	0,0,(1)	0,0,(1)	0,0,(1)	0,0,(1)	SRR317036(1;1),
chr14	104158660	+	canonical	TGCTG(A*)T	A	104158695	-35	expected	3	1	yes	no	yes	0,0,(3)	0,0,(1)	0,0,(3)	0,0,(1)	SRR545715(3;1),
chr14	104159876	+	canonical	TATTT(G*)T	G	104159889	-13	expected	1	1	no	no	yes	0,0,(1)	0,0,(1)	0,0,(0)	0,0,(0)	SRR545693(1;1),
chr14	105173220	+	canonical	TGCTG(A*)C	A	105173246	-26	expected	6	4	yes	yes	yes	2,0,(4)	2,0,(2)	0,0,(4)	0,0,(2)	SRR545705(1;1),SRR317065(1;1),SRR534318(4;2),
chr14	105175589	+	canonical	CACTC(A*)C	A	105175617	-28	expected	21	10	yes	yes	yes	0,4,(17)	0,3,(7)	0,0,(16)	0,0,(6)	SRR545685(3;1),SRR545711(6;2),SRR307913(1;1),SRR317065(1;1),SRR545714(5;1),SRR317049(1;1),SRR317064(3;2),SRR315317(1;1),
chr14	105176402	+	canonical	CACTG(A*)T	A	105176424	-22	expected	3	2	no	yes	yes	3,0,(0)	2,0,(0)	0,0,(0)	0,0,(0)	SRR317049(1;1),SRR545703(2;1),
chr14	105178726	+	canonical	GGCTG(A*)C	A	105178769	-43	expected	9	6	yes	yes	yes	5,0,(4)	3,0,(3)	0,0,(2)	0,0,(2)	SRR545694(1;1),SRR317050(2;2),SRR545719(5;2),SRR545723(1;1),
chr14	105211109	+	canonical	TGCTG(A*)C	A	105211148	-39	expected	1	1	no	no	yes	1,0,(0)	1,0,(0)	0,0,(0)	0,0,(0)	SRR317050(1;1),
chr14	105212551	+	canonical	CACTC(A*)T	A	105212572	-21	expected	2	2	yes	yes	yes	1,0,(1)	1,0,(1)	0,0,(1)	0,0,(1)	SRR317043(1;1),SRR317050(1;1),
chr14	105846395	+	canonical	AGCTG(A*)T	A	105846416	-21	expected	163	112	yes	yes	yes	138,0,(25)	88,0,(24)	1,0,(21)	1,0,(20)	SRR307924(2;2),SRR315308(3;2),SRR545706(1;1),SRR307914(1;1),SRR534326(3;1),SRR315318(2;2),SRR534334(2;1),SRR545709(1;1),SRR307923(9;9),SRR315305(1;1),SRR534317(3;1),SRR534318(4;2),SRR317042(1;1),SRR315317(1;1),SRR545702(5;1),SRR315321(6;6),SRR545718(1;1),SRR317065(5;5),SRR317048(9;6),SRR317041(1;1),SRR545714(7;1),SRR317047(2;2),SRR307921(4;2),SRR317045(1;1),SRR317063(4;4),SRR307913(5;3),SRR317050…
chr14	105850664	+	canonical	TGGTG(A*)C	A	105850689	-25	expected	4	1	no	no	yes	0,4,(0)	0,1,(0)	0,0,(0)	0,0,(0)	SRR534318(4;1),
chr14	105929803	+	canonical	TGCTG(A*)C	A	105929829	-26	expected	17	16	yes	yes	yes	11,0,(6)	10,0,(6)	0,0,(5)	0,0,(5)	SRR317062(1;1),SRR317068(1;1),SRR317039(2;2),SRR317042(2;2),SRR307913(2;1),SRR317063(3;3),SRR534318(1;1),SRR317035(1;1),SRR317043(2;2),SRR317050(1;1),SRR317044(1;1),
chr15	25584440	-	canonical	GACTT(A*)C	A	25584404	-36	expected	2	2	no	yes	yes	0,1,(1)	0,1,(1)	0,0,(0)	0,0,(0)	SRR317054(1;1),SRR545717(1;1),
chr15	28389397	-	canonical	TGTTT(A*)C	A	28389381	-16	expected	7	2	no	yes	yes	0,0,(7)	0,0,(2)	0,0,(0)	0,0,(0)	SRR534318(6;1),SRR317051(1;1),
chr15	28391531	-	canonical	TGCTG(A*)T	A	28391490	-41	expected	1	1	no	no	yes	1,0,(0)	1,0,(0)	0,0,(0)	0,0,(0)	SRR307930(1;1),
chr15	30019216	-	canonical	TGTAT(A*)T	A	30019195	-21	expected	1	1	no	no	yes	0,0,(1)	0,0,(1)	0,0,(0)	0,0,(0)	SRR317046(1;1),
chr15	30025544	-	canonical	TATTG(A*)T	A	30025517	-27	expected	3	1	yes	no	yes	0,0,(3)	0,0,(1)	0,0,(3)	0,0,(1)	SRR545685(3;1),
chr15	31354948	-	canonical	TATAG(A*)T	A	31354905	-43	expected	7	1	yes	no	yes	0,0,(7)	0,0,(1)	0,0,(7)	0,0,(1)	SRR545714(7;1),
chr15	34529773	-	canonical	TTTTC(A*)C	A	34529751	-22	expected	1	1	yes	no	yes	0,0,(1)	0,0,(1)	0,0,(1)	0,0,(1)	SRR315305(1;1),
chr15	34551171	-	canonical	AGCTC(A*)T	A	34551145	-26	expected	1	1	yes	no	yes	0,0,(1)	0,0,(1)	0,0,(1)	0,0,(1)	SRR534334(1;1),
chr15	35166236	-	canonical	TGCTA(A*)T	A	35166200	-36	expected	2	2	yes	yes	yes	1,0,(1)	1,0,(1)	0,0,(1)	0,0,(1)	SRR545706(1;1),SRR317042(1;1),
chr15	35193094	-	canonical	TACTG(A*)C	A	35193064	-30	expected	1	1	no	no	yes	1,0,(0)	1,0,(0)	0,0,(0)	0,0,(0)	SRR317052(1;1),
chr15	37187050	-	canonical	TGCTG(A*)T	A	37187013	-37	expected	1	1	yes	no	yes	0,0,(1)	0,0,(1)	0,0,(1)	0,0,(1)	SRR317044(1;1),
chr15	40330618	-	canonical	TGTTC(A*)C	A	40330595	-23	expected	1	1	no	no	yes	0,0,(1)	0,0,(1)	0,0,(0)	0,0,(0)	SRR317054(1;1),
chr15	40590181	-	canonical	TGTTC(A*)T	A	40590160	-21	expected	2	2	yes	yes	yes	0,0,(2)	0,0,(2)	0,0,(2)	0,0,(2)	SRR315305(1;1),SRR307930(1;1),
chr15	40631838	-	canonical	TGCTG(A*)C	A	40631820	-18	expected	1	1	yes	no	yes	0,0,(1)	0,0,(1)	0,0,(1)	0,0,(1)	SRR545691(1;1),
chr15	41066657	-	canonical	TGCTT(A*)T	A	41066634	-23	expected	4	1	yes	no	yes	0,0,(4)	0,0,(1)	0,0,(4)	0,0,(1)	SRR317049(4;1),
chr15	42149282	-	canonical	TACTG(A*)C	A	42149237	-45	expected	1	1	no	no	yes	1,0,(0)	1,0,(0)	0,0,(0)	0,0,(0)	SRR315308(1;1),
chr15	42152987	-	canonical	GGCTC(A*)T	A	42152956	-31	expected	2	1	yes	no	yes	0,0,(2)	0,0,(1)	0,0,(2)	0,0,(1)	SRR545718(2;1),
chr15	42453053	-	canonical	TCCTC(A*)C	A	42453027	-26	expected	1	1	no	no	yes	0,0,(1)	0,0,(1)	0,0,(0)	0,0,(0)	SRR317050(1;1),
chr15	42454399	-	canonical	TGTTC(A*)C	A	42454364	-35	expected	2	2	yes	no	yes	0,0,(2)	0,0,(2)	0,0,(2)	0,0,(2)	SRR317065(2;2),
chr15	42458452	-	canonical	TGCTG(A*)C	A	42458430	-22	expected	3	1	no	no	yes	3,0,(0)	1,0,(0)	0,0,(0)	0,0,(0)	SRR545707(3;1),
chr15	42510600	-	canonical	TAGTA(A*)T	A	42510576	-24	expected	3	2	no	yes	yes	0,2,(1)	0,1,(1)	0,0,(0)	0,0,(0)	SRR534326(2;1),SRR545706(1;1),
chr15	43351393	-	canonical	TGTTT(G*)T	G	43351390	-3	proximal	1	1	no	no	yes	0,1,(0)	0,1,(0)	0,0,(0)	0,0,(0)	SRR315310(1;1),
chr15	43363165	-	canonical	TATTT(G*)T	G	43363123	-42	expected	1	1	no	no	yes	0,1,(0)	0,1,(0)	0,0,(0)	0,0,(0)	SRR315310(1;1),
chr15	43720388	-	canonical	TGCTT(A*)T	A	43720366	-22	expected	4	2	yes	yes	yes	0,0,(4)	0,0,(2)	0,0,(1)	0,0,(1)	SRR317046(1;1),SRR534326(3;1),
chr15	44861728	-	canonical	TGCTG(A*)T	A	44861703	-25	expected	5	1	no	no	yes	5,0,(0)	1,0,(0)	0,0,(0)	0,0,(0)	SRR534318(5;1),
chr15	44944491	-	canonical	TTTTC(A*)T	A	44944464	-27	expected	1	1	yes	no	yes	0,0,(1)	0,0,(1)	0,0,(1)	0,0,(1)	SRR545688(1;1),
chr15	44967937	-	canonical	GACTC(A*)C	A	44967889	-48	expected	2	1	yes	no	yes	0,0,(2)	0,0,(1)	0,0,(2)	0,0,(1)	SRR534318(2;1),
chr15	45460356	-	canonical	CACTC(A*)C	A	45460331	-25	expected	1	1	no	no	yes	0,1,(0)	0,1,(0)	0,0,(0)	0,0,(0)	SRR317044(1;1),
chr15	48458375	-	canonical	TACTG(A*)T	A	48458325	-50	expected	2	2	no	yes	yes	2,0,(0)	2,0,(0)	0,0,(0)	0,0,(0)	SRR545688(1;1),SRR534317(1;1),
chr15	48729297	-	canonical	TATTC(A*)C	A	48729274	-23	expected	2	1	yes	no	yes	0,0,(2)	0,0,(1)	0,0,(2)	0,0,(1)	SRR545692(2;1),
chr15	48736877	-	canonical	TCCTT(A*)T	A	48736857	-20	expected	4	1	yes	no	yes	0,0,(4)	0,0,(1)	0,0,(4)	0,0,(1)	SRR545694(4;1),
chr15	48741113	-	canonical	TTCTC(A*)C	A	48741090	-23	expected	1	1	yes	no	yes	0,1,(0)	0,1,(0)	0,1,(0)	0,1,(0)	SRR545720(1;1),
chr15	48756244	-	canonical	TATTC(A*)C	A	48756218	-26	expected	5	1	yes	no	yes	0,0,(5)	0,0,(1)	0,0,(5)	0,0,(1)	SRR545702(5;1),
chr15	48773976	-	canonical	TACAG(A*)T	A	48766847	-7129	distal	5	1	no	no	yes	5,0,(0)	1,0,(0)	0,0,(0)	0,0,(0)	SRR534318(5;1),
chr15	48773996	-	canonical	TATTA(A*)T	A	48773977	-19	expected	1	1	no	no	yes	0,1,(0)	0,1,(0)	0,0,(0)	0,0,(0)	SRR545694(1;1),
chr15	49429685	-	canonical	TATTA(A*)C	A	49429655	-30	expected	1	1	yes	no	yes	0,0,(1)	0,0,(1)	0,0,(1)	0,0,(1)	SRR545706(1;1),
chr15	50875377	-	canonical	TTTTT(A*)T	A	50875356	-21	expected	1	1	no	no	yes	0,1,(0)	0,1,(0)	0,0,(0)	0,0,(0)	SRR545688(1;1),
chr15	50897371	-	canonical	TGATT(A*)C	A	50897341	-30	expected	5	1	yes	no	yes	0,0,(5)	0,0,(1)	0,0,(5)	0,0,(1)	SRR545686(5;1),
chr15	52258730	-	canonical	TGCTT(A*)T	A	52258701	-29	expected	1	1	no	no	yes	0,1,(0)	0,1,(0)	0,0,(0)	0,0,(0)	SRR545717(1;1),
chr15	55520933	-	canonical	AACTG(A*)C	A	55520910	-23	expected	1	1	no	no	yes	1,0,(0)	1,0,(0)	0,0,(0)	0,0,(0)	SRR317052(1;1),
chr15	58925585	-	canonical	TACTA(A*)T	A	58925558	-27	expected	1	1	no	no	yes	1,0,(0)	1,0,(0)	0,0,(0)	0,0,(0)	SRR545694(1;1),
chr15	59180776	-	canonical	TGTAA(A*)T	A	59180754	-22	expected	4	4	yes	yes	yes	0,4,(0)	0,4,(0)	0,4,(0)	0,4,(0)	SRR307930(1;1),SRR545686(1;1),SRR534325(1;1),SRR315321(1;1),
chr15	59181805	-	canonical	TACTT(A*)T	A	59181753	-52	expected	11	6	yes	yes	yes	0,1,(10)	0,1,(5)	0,0,(8)	0,0,(3)	SRR315320(1;1),SRR307930(1;1),SRR317050(1;1),SRR545685(3;1),SRR534335(5;2),
chr15	59182697	-	canonical	TGCTA(G*)C	G	59182660	-37	expected	4	1	yes	no	yes	4,0,(0)	1,0,(0)	4,0,(0)	1,0,(0)	SRR545715(4;1),
chr15	60639922	-	canonical	TTCTG(A*)T	A	60639888	-34	expected	22	10	yes	yes	yes	2,0,(20)	1,0,(9)	0,0,(20)	0,0,(9)	SRR545703(1;1),SRR534318(2;1),SRR545693(2;1),SRR545702(5;1),SRR545708(2;1),SRR534335(2;1),SRR317044(2;1),SRR315318(1;1),SRR307914(1;1),SRR545705(4;1),
chr15	62174962	-	canonical	AGCTC(A*)T	A	62174935	-27	expected	1	1	yes	no	yes	0,0,(1)	0,0,(1)	0,0,(1)	0,0,(1)	SRR545707(1;1),
chr15	62176495	-	canonical	TGCTA(A*)T	A	62176468	-27	expected	1	1	yes	no	yes	0,0,(1)	0,0,(1)	0,0,(1)	0,0,(1)	SRR307931(1;1),
chr15	62304381	-	canonical	TTCTC(A*)T	A	62304363	-18	expected	1	1	yes	no	yes	0,0,(1)	0,0,(1)	0,0,(1)	0,0,(1)	SRR317068(1;1),
chr15	63936787	-	canonical	TATTT(A*)T	A	63935749	-1038	distal	1	1	no	no	yes	0,1,(0)	0,1,(0)	0,0,(0)	0,0,(0)	SRR545687(1;1),
chr15	63958692	-	canonical	TTCTT(A*)T	A	63958671	-21	expected	5	1	yes	no	yes	0,0,(5)	0,0,(1)	0,0,(5)	0,0,(1)	SRR545715(5;1),
chr15	63961917	-	canonical	TGCTA(A*)C	A	63961897	-20	expected	7	5	yes	yes	yes	0,0,(7)	0,0,(5)	0,0,(7)	0,0,(5)	SRR317067(1;1),SRR545720(4;2),SRR307914(1;1),SRR545688(1;1),
chr15	64221826	-	canonical	TGCTG(G*)T	G	64221776	-50	expected	6	1	no	no	yes	0,6,(0)	0,1,(0)	0,0,(0)	0,0,(0)	SRR545706(6;1),
chr15	64452417	-	canonical	TCCTT(A*)C	A	64452396	-21	expected	1	1	yes	no	yes	0,0,(1)	0,0,(1)	0,0,(1)	0,0,(1)	SRR317055(1;1),
chr15	64496819	-	canonical	AGCTA(A*)T	A	64496788	-31	expected	1	1	no	no	yes	1,0,(0)	1,0,(0)	0,0,(0)	0,0,(0)	SRR534325(1;1),
chr15	66793871	-	canonical	TCTTA(A*)T	A	66793842	-29	expected	10	2	yes	yes	yes	0,0,(10)	0,0,(2)	0,0,(10)	0,0,(2)	SRR317042(1;1),SRR545711(9;1),
chr15	68503698	-	canonical	GACTG(A*)C	A	68503656	-42	expected	7	2	no	no	yes	7,0,(0)	2,0,(0)	0,0,(0)	0,0,(0)	SRR545719(7;2),
chr15	68632006	-	canonical	TGCTG(A*)T	A	68631982	-24	expected	4	1	yes	no	yes	0,0,(4)	0,0,(1)	0,0,(4)	0,0,(1)	SRR545701(4;1),
chr15	69075431	-	canonical	AGCTC(A*)C	A	69075392	-39	expected	3	3	yes	yes	yes	0,0,(3)	0,0,(3)	0,0,(2)	0,0,(2)	SRR317043(1;1),SRR534326(1;1),SRR317042(1;1),
chr15	70345739	-	canonical	GACTC(A*)C	A	70345713	-26	expected	2	2	yes	no	yes	0,0,(2)	0,0,(2)	0,0,(2)	0,0,(2)	SRR317049(2;2),
chr15	70353013	-	canonical	TTTTA(A*)C	A	70352988	-25	expected	1	1	yes	no	yes	0,1,(0)	0,1,(0)	0,1,(0)	0,1,(0)	SRR317045(1;1),
chr15	70358575	-	canonical	TACTC(A*)C	A	70358557	-18	expected	11	10	yes	yes	yes	3,0,(8)	3,0,(7)	0,0,(4)	0,0,(4)	SRR317048(1;1),SRR545718(1;1),SRR317042(1;1),SRR317049(1;1),SRR534332(1;1),SRR317051(2;1),SRR534331(1;1),SRR317043(1;1),SRR317050(2;2),
chr15	70972042	-	canonical	TGCTG(A*)C	A	70972015	-27	expected	1	1	no	no	yes	1,0,(0)	1,0,(0)	0,0,(0)	0,0,(0)	SRR545707(1;1),
chr15	72120391	-	canonical	TGCTA(A*)T	A	72120367	-24	expected	1	1	yes	no	yes	0,0,(1)	0,0,(1)	0,0,(1)	0,0,(1)	SRR534335(1;1),
chr15	72492121	-	canonical	TACTC(A*)C	A	72492097	-24	expected	6	5	yes	yes	yes	0,0,(6)	0,0,(5)	0,0,(3)	0,0,(2)	SRR317050(1;1),SRR317063(2;1),SRR315320(2;2),SRR317062(1;1),
chr15	72501247	-	canonical	TACTT(A*)C	A	72501232	-15	expected	2	2	yes	yes	yes	0,1,(1)	0,1,(1)	0,0,(1)	0,0,(1)	SRR317042(1;1),SRR317043(1;1),
chr15	72502215	-	canonical	TGCTT(A*)C	A	72502200	-15	expected	8	7	yes	yes	yes	0,1,(7)	0,1,(6)	0,0,(6)	0,0,(5)	SRR317054(2;2),SRR315309(1;1),SRR307930(1;1),SRR307921(1;1),SRR545717(2;1),SRR317051(1;1),
chr15	73879985	-	canonical	TCCTC(A*)C	A	73879959	-26	expected	5	2	yes	yes	yes	0,1,(4)	0,1,(1)	0,1,(0)	0,1,(0)	SRR545690(4;1),SRR307931(1;1),
chr15	74472605	-	canonical	GACTC(A*)C	A	74472584	-21	expected	3	1	no	no	yes	0,3,(0)	0,1,(0)	0,0,(0)	0,0,(0)	SRR545685(3;1),
chr15	74476363	-	canonical	TGCTC(C*)C	C	74476330	-33	expected	2	2	no	yes	yes	0,1,(1)	0,1,(1)	0,0,(0)	0,0,(0)	SRR317044(1;1),SRR545686(1;1),
chr15	74483269	-	canonical	TGTTC(A*)C	A	74483242	-27	expected	1	1	yes	no	yes	0,0,(1)	0,0,(1)	0,0,(1)	0,0,(1)	SRR317039(1;1),
chr15	75651786	-	canonical	CACTG(A*)T	A	75651779	-7	proximal	2	1	no	no	yes	2,0,(0)	1,0,(0)	0,0,(0)	0,0,(0)	SRR317049(2;1),
chr15	75772275	-	canonical	TAGTG(A*)T	A	75772255	-20	expected	1	1	yes	no	yes	0,0,(1)	0,0,(1)	0,0,(1)	0,0,(1)	SRR307931(1;1),
chr15	75902363	-	canonical	TGCTG(A*)T	A	75902335	-28	expected	1	1	no	no	yes	1,0,(0)	1,0,(0)	0,0,(0)	0,0,(0)	SRR545687(1;1),
chr15	78337433	-	canonical	AACTG(A*)C	A	78337410	-23	expected	1	1	no	no	yes	1,0,(0)	1,0,(0)	0,0,(0)	0,0,(0)	SRR317059(1;1),
chr15	78577700	-	canonical	TACTA(A*)T	A	78577681	-19	expected	4	1	yes	no	yes	0,4,(0)	0,1,(0)	0,4,(0)	0,1,(0)	SRR545708(4;1),
chr15	79063668	-	canonical	TGCTC(A*)T	A	79063645	-23	expected	3	1	yes	no	yes	0,0,(3)	0,0,(1)	0,0,(3)	0,0,(1)	SRR545720(3;1),
chr15	83222365	-	canonical	TGTTT(G*)T	G	83222306	-59	expected	1	1	no	no	yes	0,1,(0)	0,1,(0)	0,0,(0)	0,0,(0)	SRR317043(1;1),
chr15	85224088	-	canonical	TGATG(A*)C	A	85224063	-25	expected	1	1	no	no	yes	1,0,(0)	1,0,(0)	0,0,(0)	0,0,(0)	SRR317054(1;1),
chr15	88726742	-	canonical	TGCTG(A*)T	A	88726720	-22	expected	1	1	yes	no	yes	0,0,(1)	0,0,(1)	0,0,(1)	0,0,(1)	SRR317062(1;1),
chr15	89860079	-	canonical	TCCTA(A*)C	A	89860058	-21	expected	1	1	no	no	yes	0,1,(0)	0,1,(0)	0,0,(0)	0,0,(0)	SRR545688(1;1),
chr15	90335815	-	canonical	TGCTA(A*)C	A	90335793	-22	expected	3	2	yes	yes	yes	1,2,(0)	1,1,(0)	1,2,(0)	1,1,(0)	SRR317065(2;1),SRR545694(1;1),
chr15	96828717	-	canonical	TTCTG(A*)C	A	96828688	-29	expected	1	1	no	no	yes	1,0,(0)	1,0,(0)	0,0,(0)	0,0,(0)	SRR545718(1;1),
chr15	101815145	-	canonical	TCCTG(A*)C	A	101814886	-259	distal	5	2	no	yes	yes	5,0,(0)	2,0,(0)	0,0,(0)	0,0,(0)	SRR545690(4;1),SRR545689(1;1),
chr15	102242611	-	canonical	TATTT(A*)C	A	102242588	-23	expected	1	1	yes	no	yes	0,0,(1)	0,0,(1)	0,0,(1)	0,0,(1)	SRR545692(1;1),
chr15	22955112	+	canonical	TGCTG(A*)T	A	22955132	-20	expected	8	5	yes	yes	yes	0,0,(8)	0,0,(5)	0,0,(8)	0,0,(5)	SRR545705(1;1),SRR545685(3;1),SRR317063(1;1),SRR317062(2;1),SRR317064(1;1),
chr15	22991105	+	canonical	GGCTG(A*)C	A	22991131	-26	expected	4	3	yes	yes	yes	3,0,(1)	2,0,(1)	0,0,(1)	0,0,(1)	SRR307914(1;1),SRR534335(1;1),SRR545719(2;1),
chr15	27193059	+	canonical	TCCTT(A*)C	A	27193080	-21	expected	5	1	yes	no	yes	0,0,(5)	0,0,(1)	0,0,(5)	0,0,(1)	SRR317062(5;1),
chr15	31217965	+	canonical	GGCTA(A*)T	A	31217991	-26	expected	1	1	no	no	yes	0,1,(0)	0,1,(0)	0,0,(0)	0,0,(0)	SRR534317(1;1),
chr15	34521933	+	canonical	TATTT(A*)T	A	34521953	-20	expected	3	1	no	no	yes	3,0,(0)	1,0,(0)	0,0,(0)	0,0,(0)	SRR545686(3;1),
chr15	39881283	+	canonical	TGTTG(A*)T	A	39881402	-119	distal	1	1	no	no	yes	0,1,(0)	0,1,(0)	0,0,(0)	0,0,(0)	SRR545707(1;1),
chr15	39882701	+	canonical	TATAT(A*)T	A	39882716	-15	expected	4	2	no	yes	yes	0,1,(3)	0,1,(1)	0,0,(0)	0,0,(0)	SRR545723(3;1),SRR534318(1;1),
chr15	40685618	+	canonical	TGTTA(G*)T	G	40685669	-51	expected	7	2	yes	no	yes	0,7,(0)	0,2,(0)	0,7,(0)	0,2,(0)	SRR545694(7;2),
chr15	40707575	+	canonical	TGCCC(A*)C	A	40707599	-24	expected	11	11	yes	yes	yes	0,11,(0)	0,11,(0)	0,2,(0)	0,2,(0)	SRR545692(1;1),SRR545718(1;1),SRR534317(1;1),SRR534318(1;1),SRR534289(1;1),SRR317064(1;1),SRR545707(1;1),SRR534327(1;1),SRR545694(1;1),SRR534334(2;2),
chr15	40757508	+	canonical	TGGTA(A*)C	A	40757533	-25	expected	1	1	yes	no	yes	0,0,(1)	0,0,(1)	0,0,(1)	0,0,(1)	SRR545688(1;1),
chr15	40990934	+	canonical	TACTG(A*)T	A	40990954	-20	expected	1	1	no	no	yes	1,0,(0)	1,0,(0)	0,0,(0)	0,0,(0)	SRR315305(1;1),
chr15	41010974	+	canonical	TGTTC(A*)T	A	41011002	-28	expected	1	1	yes	no	yes	0,0,(1)	0,0,(1)	0,0,(1)	0,0,(1)	SRR317062(1;1),
chr15	41148064	+	canonical	CGCTC(A*)C	A	41148089	-25	expected	1	1	yes	no	yes	0,0,(1)	0,0,(1)	0,0,(1)	0,0,(1)	SRR307924(1;1),
chr15	41769343	+	canonical	AACTC(A*)C	A	41769362	-19	expected	9	3	yes	yes	yes	0,0,(9)	0,0,(3)	0,0,(9)	0,0,(3)	SRR317051(1;1),SRR545694(6;1),SRR545704(2;1),
chr15	43484914	+	canonical	TGTTA(A*)T	A	43484940	-26	expected	1	1	yes	no	yes	0,0,(1)	0,0,(1)	0,0,(1)	0,0,(1)	SRR534325(1;1),
chr15	44055246	+	canonical	TGCTT(C*)T	C	44055274	-28	expected	2	2	yes	yes	yes	0,0,(2)	0,0,(2)	0,0,(1)	0,0,(1)	SRR545692(1;1),SRR534317(1;1),
chr15	44062424	+	canonical	TGTAA(A*)C	A	44062447	-23	expected	2	2	yes	yes	yes	0,0,(2)	0,0,(2)	0,0,(2)	0,0,(2)	SRR307930(1;1),SRR315312(1;1),
chr15	45009784	+	canonical	TGCTA(A*)C	A	45009804	-20	expected	9	3	yes	yes	yes	9,0,(0)	3,0,(0)	8,0,(0)	2,0,(0)	SRR545690(7;1),SRR534331(1;1),SRR545720(1;1),
chr15	45983143	+	canonical	TGCAG(G*)T	G	45983170	-27	expected	2	1	no	no	yes	0,2,(0)	0,1,(0)	0,0,(0)	0,0,(0)	SRR307921(2;1),
chr15	49716180	+	canonical	TTTTT(A*)T	A	49716228	-48	expected	2	2	no	yes	yes	0,1,(1)	0,1,(1)	0,0,(0)	0,0,(0)	SRR545703(1;1),SRR545702(1;1),
chr15	51217260	+	canonical	TATTT(A*)C	A	51217294	-34	expected	1	1	yes	no	yes	0,0,(1)	0,0,(1)	0,0,(1)	0,0,(1)	SRR317042(1;1),
chr15	51226801	+	canonical	TGCAA(A*)T	A	51226820	-19	expected	3	1	yes	no	yes	3,0,(0)	1,0,(0)	3,0,(0)	1,0,(0)	SRR534334(3;1),
chr15	55646971	+	canonical	TATTT(A*)T	A	55646995	-24	expected	2	1	yes	no	yes	0,0,(2)	0,0,(1)	0,0,(2)	0,0,(1)	SRR534335(2;1),
chr15	57921858	+	canonical	TTTTC(A*)C	A	57921899	-41	expected	1	1	yes	no	yes	0,0,(1)	0,0,(1)	0,0,(1)	0,0,(1)	SRR317069(1;1),
chr15	59347858	+	canonical	TACTA(A*)C	A	59347880	-22	expected	4	1	no	no	yes	0,0,(4)	0,0,(1)	0,0,(0)	0,0,(0)	SRR545708(4;1),
chr15	59416949	+	canonical	TAATC(A*)C	A	59416965	-16	expected	1	1	yes	no	yes	0,0,(1)	0,0,(1)	0,0,(1)	0,0,(1)	SRR317051(1;1),
chr15	63017155	+	canonical	TACAT(A*)T	A	63017174	-19	expected	4	1	yes	no	yes	0,0,(4)	0,0,(1)	0,0,(4)	0,0,(1)	SRR534327(4;1),
chr15	63075908	+	canonical	TTCTC(A*)T	A	63075969	-61	distal	3	1	yes	no	yes	0,0,(3)	0,0,(1)	0,0,(3)	0,0,(1)	SRR545685(3;1),
chr15	63353829	+	canonical	TTTTC(A*)T	A	63353911	-82	distal	7	3	yes	yes	yes	2,0,(5)	1,0,(2)	2,0,(0)	1,0,(0)	SRR545719(4;1),SRR545702(1;1),SRR545720(2;1),
chr15	63419028	+	canonical	TGTTA(A*)T	A	63419057	-29	expected	1	1	no	no	yes	0,0,(1)	0,0,(1)	0,0,(0)	0,0,(0)	SRR545715(1;1),
chr15	64698499	+	canonical	GGCTG(A*)C	A	64698528	-29	expected	5	2	no	yes	yes	5,0,(0)	2,0,(0)	0,0,(0)	0,0,(0)	SRR317048(1;1),SRR545713(4;1),
chr15	65147095	+	canonical	AGCTC(A*)T	A	65147119	-24	expected	1	1	yes	no	yes	0,0,(1)	0,0,(1)	0,0,(1)	0,0,(1)	SRR534332(1;1),
chr15	65849055	+	canonical	TTCTC(A*)C	A	65849076	-21	expected	4	1	yes	no	yes	0,0,(4)	0,0,(1)	0,0,(4)	0,0,(1)	SRR545720(4;1),
chr15	65863860	+	canonical	TTTTC(A*)C	A	65863885	-25	expected	6	3	yes	yes	yes	0,0,(6)	0,0,(3)	0,0,(6)	0,0,(3)	SRR545693(2;1),SRR545718(1;1),SRR534318(3;1),
chr15	67459090	+	canonical	TTTTA(A*)C	A	67459116	-26	expected	3	2	yes	no	yes	0,0,(3)	0,0,(2)	0,0,(3)	0,0,(2)	SRR317057(3;2),
chr15	67984790	+	canonical	TAGTT(A*)C	A	67984816	-26	expected	1	1	yes	no	yes	0,0,(1)	0,0,(1)	0,0,(1)	0,0,(1)	SRR317052(1;1),
chr15	69745959	+	canonical	TTTTG(A*)T	A	69745985	-26	expected	9	2	no	yes	yes	0,8,(1)	0,1,(1)	0,0,(0)	0,0,(0)	SRR545707(1;1),SRR534318(8;1),
chr15	72858883	+	canonical	TATTA(A*)C	A	72858903	-20	expected	1	1	yes	no	yes	0,0,(1)	0,0,(1)	0,0,(1)	0,0,(1)	SRR545694(1;1),
chr15	72875514	+	canonical	GGCTG(A*)C	A	72875548	-34	expected	3	1	yes	no	yes	0,0,(3)	0,0,(1)	0,0,(3)	0,0,(1)	SRR545712(3;1),
chr15	73590666	+	canonical	TGCTA(A*)C	A	73590688	-22	expected	1	1	yes	no	yes	0,0,(1)	0,0,(1)	0,0,(1)	0,0,(1)	SRR317063(1;1),
chr15	74912322	+	canonical	AGCTG(A*)C	A	74912349	-27	expected	1	1	no	no	yes	1,0,(0)	1,0,(0)	0,0,(0)	0,0,(0)	SRR534325(1;1),
chr15	74914810	+	canonical	TTCTC(A*)T	A	74914834	-24	expected	3	1	yes	no	yes	0,0,(3)	0,0,(1)	0,0,(3)	0,0,(1)	SRR545693(3;1),
chr15	74917211	+	canonical	TGCTG(A*)T	A	74917242	-31	expected	11	1	no	no	yes	11,0,(0)	1,0,(0)	0,0,(0)	0,0,(0)	SRR545712(11;1),
chr15	74920914	+	canonical	TACTG(A*)C	A	74920944	-30	expected	2	1	no	no	yes	2,0,(0)	1,0,(0)	0,0,(0)	0,0,(0)	SRR317064(2;1),
chr15	75336703	+	canonical	CACTG(A*)C	A	75336726	-23	expected	1	1	no	no	yes	1,0,(0)	1,0,(0)	0,0,(0)	0,0,(0)	SRR545717(1;1),
chr15	77775245	+	canonical	TACTT(A*)C	A	77775311	-66	distal	1	1	yes	no	yes	0,0,(1)	0,0,(1)	0,0,(1)	0,0,(1)	SRR545704(1;1),
chr15	78837947	+	canonical	TATTG(A*)T	A	78837975	-28	expected	7	2	no	yes	yes	7,0,(0)	2,0,(0)	0,0,(0)	0,0,(0)	SRR534317(1;1),SRR534318(6;1),
chr15	79186367	+	canonical	TATTG(A*)C	A	79186399	-32	expected	1	1	yes	no	yes	0,0,(1)	0,0,(1)	0,0,(1)	0,0,(1)	SRR545693(1;1),
chr15	79606074	+	canonical	TGATA(A*)C	A	79606098	-24	expected	5	1	no	no	yes	5,0,(0)	1,0,(0)	0,0,(0)	0,0,(0)	SRR545685(5;1),
chr15	79606850	+	canonical	GGCTC(A*)T	A	79606882	-32	expected	2	1	no	no	yes	0,0,(2)	0,0,(1)	0,0,(0)	0,0,(0)	SRR307921(2;1),
chr15	80454559	+	canonical	TGCTG(A*)T	A	80454587	-28	expected	6	3	yes	yes	yes	3,0,(3)	1,0,(2)	0,0,(3)	0,0,(2)	SRR307924(3;1),SRR545717(2;1),SRR534289(1;1),
chr15	81217965	+	canonical	TGCAG(A*)T	A	81221242	-3277	distal	1	1	yes	no	yes	1,0,(0)	1,0,(0)	1,0,(0)	1,0,(0)	SRR545720(1;1),
chr15	85345075	+	canonical	TGCTC(A*)T	A	85345093	-18	expected	2	1	yes	no	yes	0,2,(0)	0,1,(0)	0,2,(0)	0,1,(0)	SRR545690(2;1),
chr15	85406757	+	canonical	TGCTC(A*)C	A	85406782	-25	expected	5	1	yes	no	yes	0,0,(5)	0,0,(1)	0,0,(5)	0,0,(1)	SRR315308(5;1),
chr15	86262281	+	canonical	TCCTG(A*)C	A	86262306	-25	expected	1	1	no	no	yes	1,0,(0)	1,0,(0)	0,0,(0)	0,0,(0)	SRR534317(1;1),
chr15	90162918	+	canonical	TACTT(A*)C	A	90162938	-20	expected	1	1	yes	no	yes	0,0,(1)	0,0,(1)	0,0,(1)	0,0,(1)	SRR317036(1;1),
chr15	90768871	+	canonical	TTCTC(A*)T	A	90768892	-21	expected	1	1	yes	no	yes	0,0,(1)	0,0,(1)	0,0,(1)	0,0,(1)	SRR545720(1;1),
chr15	90992766	+	canonical	TCTTT(A*)C	A	90992790	-24	expected	1	1	yes	no	yes	0,0,(1)	0,0,(1)	0,0,(1)	0,0,(1)	SRR307921(1;1),
chr15	90995988	+	canonical	TTCTG(A*)C	A	90996006	-18	expected	1	1	yes	no	yes	0,0,(1)	0,0,(1)	0,0,(1)	0,0,(1)	SRR317040(1;1),
chr15	91017686	+	canonical	TGCTA(A*)C	A	91017716	-30	expected	9	3	no	yes	yes	9,0,(0)	3,0,(0)	0,0,(0)	0,0,(0)	SRR317047(2;2),SRR545711(7;1),
chr15	91184307	+	canonical	TCCTC(A*)C	A	91184328	-21	expected	7	4	yes	yes	yes	0,2,(5)	0,1,(3)	0,2,(5)	0,1,(3)	SRR545712(4;2),SRR317062(2;1),SRR317036(1;1),
chr15	91424484	+	canonical	AGCTG(A*)C	A	91424515	-31	expected	2	2	no	yes	yes	2,0,(0)	2,0,(0)	0,0,(0)	0,0,(0)	SRR317042(1;1),SRR545715(1;1),
chr15	91435263	+	canonical	TTCTG(A*)T	A	91435287	-24	expected	42	22	yes	yes	yes	13,1,(28)	3,1,(18)	0,0,(28)	0,0,(18)	SRR534334(3;1),SRR545717(3;1),SRR545709(2;2),SRR534325(4;2),SRR545719(2;2),SRR545707(2;2),SRR545694(5;2),SRR545685(10;2),SRR545691(10;7),SRR545704(1;1),
chr15	91453291	+	canonical	AACTG(A*)T	A	91453319	-28	expected	1	1	no	no	yes	1,0,(0)	1,0,(0)	0,0,(0)	0,0,(0)	SRR317064(1;1),
chr15	91479492	+	canonical	TGCTG(A*)C	A	91479514	-22	expected	1	1	no	no	yes	1,0,(0)	1,0,(0)	0,0,(0)	0,0,(0)	SRR317065(1;1),
chr15	91492863	+	canonical	TGCCC(A*)C	A	91492883	-20	expected	4	2	no	yes	yes	0,4,(0)	0,2,(0)	0,0,(0)	0,0,(0)	SRR315318(1;1),SRR317051(3;1),
chr15	91504226	+	canonical	TAGTG(A*)C	A	91504254	-28	expected	4	2	yes	yes	yes	0,1,(3)	0,1,(1)	0,1,(3)	0,1,(1)	SRR317062(3;1),SRR315317(1;1),
chr15	93489018	+	canonical	TGTTT(A*)T	A	93489050	-32	expected	1	1	yes	no	yes	0,0,(1)	0,0,(1)	0,0,(1)	0,0,(1)	SRR534335(1;1),
chr15	93534680	+	canonical	TTTTA(A*)T	A	93534705	-25	expected	1	1	yes	no	yes	0,0,(1)	0,0,(1)	0,0,(1)	0,0,(1)	SRR317039(1;1),
chr15	99454522	+	canonical	CACTC(A*)C	A	99454543	-21	expected	3	3	no	yes	yes	0,3,(0)	0,3,(0)	0,0,(0)	0,0,(0)	SRR317062(2;2),SRR545691(1;1),
chr15	99491782	+	canonical	TCCTC(A*)C	A	99491802	-20	expected	26	12	yes	yes	yes	1,0,(25)	1,0,(11)	0,0,(7)	0,0,(4)	SRR317065(1;1),SRR534318(3;1),SRR307914(2;1),SRR317062(4;2),SRR317039(2;1),SRR317051(3;3),SRR317057(3;1),SRR545694(5;1),SRR317045(3;1),
chr15	100215566	+	canonical	TATTC(A*)T	A	100215603	-37	expected	1	1	yes	no	yes	0,0,(1)	0,0,(1)	0,0,(1)	0,0,(1)	SRR534312(1;1),
chr15	101605643	+	canonical	TGCTC(C*)T	C	101606844	-1201	distal	1	1	yes	no	yes	0,0,(1)	0,0,(1)	0,0,(1)	0,0,(1)	SRR317035(1;1),
chr16	134631	-	canonical	GGCTC(A*)C	A	134594	-37	expected	1	1	yes	no	yes	0,0,(1)	0,0,(1)	0,0,(1)	0,0,(1)	SRR317048(1;1),
chr16	138910	-	canonical	TGGTC(A*)C	A	138888	-22	expected	3	1	yes	no	yes	0,0,(3)	0,0,(1)	0,0,(3)	0,0,(1)	SRR317050(3;1),
chr16	256167	-	canonical	TGCTT(A*)C	A	256146	-21	expected	25	4	yes	yes	yes	23,0,(2)	2,0,(2)	0,0,(2)	0,0,(2)	SRR317056(1;1),SRR545716(1;1),SRR545711(22;1),SRR307922(1;1),
chr16	422307	-	canonical	CACTG(A*)T	A	422283	-24	expected	16	6	yes	yes	yes	3,0,(13)	2,0,(4)	0,0,(13)	0,0,(4)	SRR545691(1;1),SRR545693(2;1),SRR534318(10;2),SRR317042(1;1),SRR545717(2;1),
chr16	775597	-	canonical	TGCTC(A*)T	A	775580	-17	expected	3	3	yes	yes	yes	0,0,(3)	0,0,(3)	0,0,(3)	0,0,(3)	SRR317036(1;1),SRR307921(1;1),SRR317050(1;1),
chr16	789771	-	canonical	CACTC(A*)C	A	789738	-33	expected	2	1	yes	no	yes	0,0,(2)	0,0,(1)	0,0,(2)	0,0,(1)	SRR545692(2;1),
chr16	1499354	-	canonical	CACTG(A*)C	A	1499328	-26	expected	1	1	no	no	yes	1,0,(0)	1,0,(0)	0,0,(0)	0,0,(0)	SRR534327(1;1),
chr16	1501755	-	canonical	AGCTC(A*)T	A	1501717	-38	expected	9	3	yes	yes	yes	0,0,(9)	0,0,(3)	0,0,(7)	0,0,(2)	SRR545715(6;1),SRR317049(1;1),SRR317036(2;1),
chr16	1507787	-	canonical	TTTTC(A*)T	A	1507757	-30	expected	3	1	yes	no	yes	0,0,(3)	0,0,(1)	0,0,(3)	0,0,(1)	SRR545714(3;1),
chr16	1634483	-	canonical	TCCTG(A*)C	A	1634421	-62	distal	1	1	no	no	yes	1,0,(0)	1,0,(0)	0,0,(0)	0,0,(0)	SRR315310(1;1),
chr16	2141616	-	canonical	TACTG(A*)C	A	2141598	-18	expected	1	1	no	no	yes	1,0,(0)	1,0,(0)	0,0,(0)	0,0,(0)	SRR317044(1;1),
chr16	2152659	-	canonical	GGCTC(A*)C	A	2152634	-25	expected	1	1	no	no	yes	1,0,(0)	1,0,(0)	0,0,(0)	0,0,(0)	SRR317041(1;1),
chr16	2155504	-	canonical	TGCTG(A*)C	A	2155475	-29	expected	2	1	no	no	yes	2,0,(0)	1,0,(0)	0,0,(0)	0,0,(0)	SRR534318(2;1),
chr16	3779905	-	canonical	TGCTG(A*)C	A	3779875	-30	expected	1	1	no	no	yes	1,0,(0)	1,0,(0)	0,0,(0)	0,0,(0)	SRR317058(1;1),
chr16	3824719	-	canonical	TCCTA(A*)T	A	3824694	-25	expected	1	1	no	no	yes	1,0,(0)	1,0,(0)	0,0,(0)	0,0,(0)	SRR545709(1;1),
chr16	4411103	-	canonical	TGATC(A*)C	A	4411086	-17	expected	3	1	yes	no	yes	0,0,(3)	0,0,(1)	0,0,(3)	0,0,(1)	SRR545703(3;1),
chr16	4411500	-	canonical	TACTG(A*)T	A	4411470	-30	expected	1	1	no	no	yes	0,1,(0)	0,1,(0)	0,0,(0)	0,0,(0)	SRR317067(1;1),
chr16	4776879	-	canonical	TGCTC(G*)T	G	4776855	-24	expected	6	6	no	yes	yes	1,5,(0)	1,5,(0)	0,0,(0)	0,0,(0)	SRR317044(1;1),SRR317062(2;2),SRR317038(1;1),SRR317036(1;1),SRR317042(1;1),
chr16	4867718	-	canonical	AACTC(A*)T	A	4867698	-20	expected	14	8	yes	yes	yes	0,0,(14)	0,0,(8)	0,0,(8)	0,0,(3)	SRR545705(4;1),SRR307921(1;1),SRR534327(2;1),SRR545707(3;2),SRR545719(2;1),SRR545718(2;2),
chr16	4896230	-	canonical	TGTTG(A*)C	A	4896211	-19	expected	6	2	yes	yes	yes	0,0,(6)	0,0,(2)	0,0,(6)	0,0,(2)	SRR545687(1;1),SRR534318(5;1),
chr16	8989037	-	canonical	CACTT(A*)C	A	8989007	-30	expected	11	3	yes	yes	yes	0,0,(11)	0,0,(3)	0,0,(11)	0,0,(3)	SRR317062(4;1),SRR317043(1;1),SRR317057(6;1),
chr16	8992516	-	canonical	TATTT(A*)T	A	8992496	-20	expected	6	3	yes	yes	yes	0,0,(6)	0,0,(3)	0,0,(6)	0,0,(3)	SRR317062(1;1),SRR545704(3;1),SRR317049(2;1),
chr16	11868374	-	canonical	TACAG(A*)T	A	11864843	-3531	distal	1	1	no	no	yes	1,0,(0)	1,0,(0)	0,0,(0)	0,0,(0)	SRR545692(1;1),
chr16	15219684	-	canonical	CGCTG(A*)C	A	15219664	-20	expected	2	2	yes	yes	yes	1,0,(1)	1,0,(1)	0,0,(1)	0,0,(1)	SRR534289(1;1),SRR545717(1;1),
chr16	18796185	-	canonical	TATTG(G*)T	G	18796145	-40	expected	1	1	no	no	yes	0,1,(0)	0,1,(0)	0,0,(0)	0,0,(0)	SRR545687(1;1),
chr16	18853814	-	canonical	TTCTA(A*)T	A	18853776	-38	expected	1	1	yes	no	yes	0,1,(0)	0,1,(0)	0,1,(0)	0,1,(0)	SRR545688(1;1),
chr16	23085221	-	canonical	TGCTG(A*)T	A	23085201	-20	expected	5	4	yes	yes	yes	2,0,(3)	2,0,(2)	0,0,(3)	0,0,(2)	SRR534326(2;1),SRR317067(1;1),SRR317043(1;1),SRR307913(1;1),
chr16	23634483	-	canonical	TCCTC(A*)C	A	23634451	-32	expected	1	1	yes	no	yes	0,0,(1)	0,0,(1)	0,0,(1)	0,0,(1)	SRR315306(1;1),
chr16	23721894	-	canonical	TGCTT(A*)T	A	23721870	-24	expected	1	1	no	no	yes	0,1,(0)	0,1,(0)	0,0,(0)	0,0,(0)	SRR317054(1;1),
chr16	24964383	-	canonical	TGCTG(A*)T	A	24964363	-20	expected	12	7	no	yes	yes	11,0,(1)	6,0,(1)	0,0,(0)	0,0,(0)	SRR534318(3;1),SRR317042(3;1),SRR307914(1;1),SRR317050(1;1),SRR317045(3;2),SRR317051(1;1),
chr16	25263377	-	canonical	TAGTC(A*)T	A	25263367	-10	proximal	1	1	no	no	yes	0,0,(1)	0,0,(1)	0,0,(0)	0,0,(0)	SRR307921(1;1),
chr16	27500538	-	canonical	TGATG(A*)C	A	27500499	-39	expected	1	1	no	no	yes	1,0,(0)	1,0,(0)	0,0,(0)	0,0,(0)	SRR317043(1;1),
chr16	28117558	-	canonical	TGCTC(A*)C	A	28117535	-23	expected	1	1	yes	no	yes	0,0,(1)	0,0,(1)	0,0,(1)	0,0,(1)	SRR317035(1;1),
chr16	28124392	-	canonical	AGCTG(A*)C	A	28124371	-21	expected	5	2	no	yes	yes	5,0,(0)	2,0,(0)	0,0,(0)	0,0,(0)	SRR545703(2;1),SRR545718(3;1),
chr16	28133102	-	canonical	TGTTT(A*)C	A	28133083	-19	expected	2	1	yes	no	yes	0,0,(2)	0,0,(1)	0,0,(2)	0,0,(1)	SRR317051(2;1),
chr16	30366060	-	canonical	TCCTC(A*)C	A	30366028	-32	expected	1	1	yes	no	yes	0,0,(1)	0,0,(1)	0,0,(1)	0,0,(1)	SRR317040(1;1),
chr16	30376943	-	canonical	TACTG(A*)C	A	30376915	-28	expected	1	1	no	no	yes	1,0,(0)	1,0,(0)	0,0,(0)	0,0,(0)	SRR545706(1;1),
chr16	46637596	-	canonical	TATTT(A*)C	A	46637571	-25	expected	1	1	yes	no	yes	0,0,(1)	0,0,(1)	0,0,(1)	0,0,(1)	SRR545707(1;1),
chr16	50709856	-	canonical	TGCAG(A*)T	A	50709832	-24	expected	1	1	yes	no	yes	0,0,(1)	0,0,(1)	0,0,(1)	0,0,(1)	SRR307922(1;1),
chr16	53532538	-	canonical	TCCTA(A*)C	A	53532508	-30	expected	5	1	yes	no	yes	0,0,(5)	0,0,(1)	0,0,(5)	0,0,(1)	SRR545712(5;1),
chr16	56473680	-	canonical	TGTTT(A*)C	A	56473658	-22	expected	1	1	yes	no	yes	0,0,(1)	0,0,(1)	0,0,(1)	0,0,(1)	SRR307930(1;1),
chr16	57805373	-	canonical	CACTC(A*)T	A	57805349	-24	expected	2	2	yes	yes	yes	0,0,(2)	0,0,(2)	0,0,(2)	0,0,(2)	SRR317062(1;1),SRR317036(1;1),
chr16	58202625	-	canonical	TGCTT(A*)C	A	58202597	-28	expected	6	5	yes	yes	yes	0,4,(2)	0,3,(2)	0,0,(1)	0,0,(1)	SRR317043(1;1),SRR315320(2;1),SRR307914(1;1),SRR545721(1;1),SRR545707(1;1),
chr16	58566000	-	canonical	TTCTG(A*)C	A	58565979	-21	expected	1	1	no	no	yes	0,0,(1)	0,0,(1)	0,0,(0)	0,0,(0)	SRR315317(1;1),
chr16	58621345	-	canonical	TTCTT(A*)T	A	58621317	-28	expected	2	1	yes	no	yes	0,0,(2)	0,0,(1)	0,0,(2)	0,0,(1)	SRR545719(2;1),
chr16	58621807	-	canonical	TGCTA(A*)T	A	58621782	-25	expected	13	9	yes	yes	yes	0,2,(11)	0,2,(7)	0,0,(9)	0,0,(6)	SRR545718(2;2),SRR545702(1;1),SRR307931(1;1),SRR545707(1;1),SRR545690(3;1),SRR545686(2;1),SRR545704(1;1),SRR545701(2;1),
chr16	58752623	-	canonical	TGTTC(A*)T	A	58752592	-31	expected	1	1	yes	no	yes	0,1,(0)	0,1,(0)	0,1,(0)	0,1,(0)	SRR315310(1;1),
chr16	65025873	-	canonical	TATAA(A*)C	A	65025838	-35	expected	2	2	yes	yes	yes	2,0,(0)	2,0,(0)	2,0,(0)	2,0,(0)	SRR545691(1;1),SRR534335(1;1),
chr16	65026958	-	canonical	TGCTA(A*)T	A	65026937	-21	expected	2	1	no	no	yes	2,0,(0)	1,0,(0)	0,0,(0)	0,0,(0)	SRR545709(2;1),
chr16	66757763	-	canonical	TTCTC(A*)C	A	66757725	-38	expected	1	1	yes	no	yes	0,0,(1)	0,0,(1)	0,0,(1)	0,0,(1)	SRR307924(1;1),
chr16	66850594	-	canonical	TGCTA(A*)C	A	66850575	-19	expected	7	3	no	yes	yes	2,5,(0)	2,1,(0)	0,0,(0)	0,0,(0)	SRR545712(5;1),SRR545709(1;1),SRR545687(1;1),
chr16	66851420	-	canonical	TACTG(A*)T	A	66851390	-30	expected	4	3	no	yes	yes	4,0,(0)	3,0,(0)	0,0,(0)	0,0,(0)	SRR545689(1;1),SRR534317(2;1),SRR545690(1;1),
chr16	66855487	-	canonical	TGTTC(A*)T	A	66855462	-25	expected	3	1	yes	no	yes	0,0,(3)	0,0,(1)	0,0,(3)	0,0,(1)	SRR545719(3;1),
chr16	67272889	-	canonical	TGCTA(A*)C	A	67272870	-19	expected	2	2	yes	yes	yes	1,0,(1)	1,0,(1)	0,0,(1)	0,0,(1)	SRR534289(2;2),
chr16	67985224	-	canonical	TGGTG(A*)C	A	67985207	-17	expected	14	7	yes	yes	yes	0,5,(9)	0,2,(5)	0,0,(9)	0,0,(5)	SRR534334(4;2),SRR545719(2;1),SRR545718(1;1),SRR545694(2;1),SRR545712(4;1),SRR317064(1;1),
chr16	69390984	-	canonical	TGGTA(A*)T	A	69390959	-25	expected	2	2	no	no	yes	0,0,(2)	0,0,(2)	0,0,(0)	0,0,(0)	SRR545718(2;2),
chr16	70286835	-	canonical	TGCTG(A*)C	A	70286809	-26	expected	6	5	yes	yes	yes	5,0,(1)	4,0,(1)	0,0,(1)	0,0,(1)	SRR317063(2;1),SRR317052(1;1),SRR317042(2;2),SRR317049(1;1),
chr16	70299588	-	canonical	TTTTG(A*)C	A	70299565	-23	expected	3	3	yes	yes	yes	0,0,(3)	0,0,(3)	0,0,(3)	0,0,(3)	SRR307913(1;1),SRR315311(1;1),SRR315309(1;1),
chr16	70515788	-	canonical	GGCTG(A*)T	A	70515768	-20	expected	8	8	yes	yes	yes	6,0,(2)	6,0,(2)	0,0,(2)	0,0,(2)	SRR317063(1;1),SRR317050(1;1),SRR534289(1;1),SRR317054(1;1),SRR317062(1;1),SRR307930(1;1),SRR317049(2;2),
chr16	70546366	-	canonical	TCTTT(A*)C	A	70546335	-31	expected	2	1	no	no	yes	0,2,(0)	0,1,(0)	0,0,(0)	0,0,(0)	SRR545713(2;1),
chr16	71487285	-	canonical	TATTC(A*)T	A	71487253	-32	expected	1	1	yes	no	yes	0,0,(1)	0,0,(1)	0,0,(1)	0,0,(1)	SRR317039(1;1),
chr16	71715840	-	canonical	TACTA(G*)C	G	71715808	-32	expected	2	1	yes	no	yes	0,2,(0)	0,1,(0)	0,2,(0)	0,1,(0)	SRR307914(2;1),
chr16	71798653	-	canonical	TGTTG(A*)C	A	71798629	-24	expected	2	1	yes	no	yes	0,0,(2)	0,0,(1)	0,0,(2)	0,0,(1)	SRR545708(2;1),
chr16	71898171	-	canonical	TCCTA(A*)T	A	71898145	-26	expected	1	1	yes	no	yes	0,0,(1)	0,0,(1)	0,0,(1)	0,0,(1)	SRR534312(1;1),
chr16	75669416	-	canonical	TCCTG(A*)T	A	75668190	-1226	distal	2	1	no	no	yes	2,0,(0)	1,0,(0)	0,0,(0)	0,0,(0)	SRR315306(2;1),
chr16	84093076	-	canonical	TAGTA(A*)T	A	84093033	-43	expected	23	8	no	yes	yes	0,23,(0)	0,8,(0)	0,0,(0)	0,0,(0)	SRR545712(9;1),SRR317067(1;1),SRR545703(1;1),SRR545691(4;1),SRR545718(1;1),SRR545705(2;1),SRR545685(4;1),SRR317044(1;1),
chr16	84100255	-	canonical	TCTTC(A*)T	A	84100218	-37	expected	5	1	yes	no	yes	0,0,(5)	0,0,(1)	0,0,(5)	0,0,(1)	SRR545713(5;1),
chr16	85022498	-	canonical	TTTTT(A*)C	A	85022479	-19	expected	1	1	no	no	yes	0,0,(1)	0,0,(1)	0,0,(0)	0,0,(0)	SRR317043(1;1),
chr16	85813495	-	canonical	TGCTG(A*)C	A	85813473	-22	expected	1	1	yes	no	yes	0,0,(1)	0,0,(1)	0,0,(1)	0,0,(1)	SRR317062(1;1),
chr16	87365141	-	canonical	AGCTC(A*)C	A	87365116	-25	expected	2	1	no	no	yes	0,0,(2)	0,0,(1)	0,0,(0)	0,0,(0)	SRR534318(2;1),
chr16	87367910	-	canonical	TGCTG(A*)C	A	87367892	-18	expected	1	1	no	no	yes	1,0,(0)	1,0,(0)	0,0,(0)	0,0,(0)	SRR545708(1;1),
chr16	87446829	-	canonical	AGTTG(A*)T	A	87446801	-28	expected	1	1	no	no	yes	1,0,(0)	1,0,(0)	0,0,(0)	0,0,(0)	SRR317062(1;1),
chr16	87790106	-	canonical	TGCTG(A*)C	A	87790083	-23	expected	1	1	no	no	yes	1,0,(0)	1,0,(0)	0,0,(0)	0,0,(0)	SRR315311(1;1),
chr16	87868221	-	canonical	GGCTC(A*)C	A	87868197	-24	expected	2	2	yes	yes	yes	0,1,(1)	0,1,(1)	0,0,(1)	0,0,(1)	SRR534289(1;1),SRR317049(1;1),
chr16	87872441	-	canonical	AGCTC(A*)C	A	87872423	-18	expected	1	1	yes	no	yes	0,0,(1)	0,0,(1)	0,0,(1)	0,0,(1)	SRR317049(1;1),
chr16	88789755	-	canonical	TCCTA(A*)C	A	88789736	-19	expected	1	1	yes	no	yes	0,0,(1)	0,0,(1)	0,0,(1)	0,0,(1)	SRR545702(1;1),
chr16	88791504	-	canonical	TGCTC(A*)C	A	88791488	-16	expected	8	4	yes	yes	yes	0,1,(7)	0,1,(3)	0,0,(7)	0,0,(3)	SRR317063(1;1),SRR545694(1;1),SRR545686(6;2),
chr16	88792116	-	canonical	TGCTC(A*)C	A	88792092	-24	expected	17	10	yes	yes	yes	0,7,(10)	0,4,(6)	0,0,(10)	0,0,(6)	SRR534332(1;1),SRR545719(3;1),SRR534333(2;1),SRR545708(1;1),SRR317048(1;1),SRR534327(2;1),SRR545694(1;1),SRR545685(6;3),
chr16	88803166	-	canonical	AGCTG(A*)C	A	88803147	-19	expected	2	1	no	no	yes	2,0,(0)	1,0,(0)	0,0,(0)	0,0,(0)	SRR534327(2;1),
chr16	88908410	-	canonical	TTCTT(A*)T	A	88908379	-31	expected	1	1	yes	no	yes	0,0,(1)	0,0,(1)	0,0,(1)	0,0,(1)	SRR545718(1;1),
chr16	88958913	-	canonical	TCCTC(A*)T	A	88958893	-20	expected	1	1	no	no	yes	0,1,(0)	0,1,(0)	0,0,(0)	0,0,(0)	SRR307931(1;1),
chr16	89836690	-	canonical	TACTG(A*)T	A	89836667	-23	expected	4	2	yes	yes	yes	2,0,(2)	1,0,(1)	0,0,(2)	0,0,(1)	SRR545720(2;1),SRR545713(2;1),
chr16	89837062	-	canonical	CGCTC(A*)T	A	89837042	-20	expected	4	2	yes	yes	yes	0,0,(4)	0,0,(2)	0,0,(2)	0,0,(1)	SRR545721(2;1),SRR317043(2;1),
chr16	89845438	-	canonical	GACTG(A*)T	A	89845411	-27	expected	5	3	yes	yes	yes	0,0,(5)	0,0,(3)	0,0,(4)	0,0,(2)	SRR317064(1;1),SRR534318(1;1),SRR534334(3;1),
chr16	89865672	-	canonical	TGCTG(A*)C	A	89865640	-32	expected	1	1	no	no	yes	1,0,(0)	1,0,(0)	0,0,(0)	0,0,(0)	SRR317043(1;1),
chr16	129401	+	canonical	TGCTT(A*)T	A	129423	-22	expected	2	2	yes	yes	yes	0,0,(2)	0,0,(2)	0,0,(1)	0,0,(1)	SRR307923(1;1),SRR534317(1;1),
chr16	630154	+	canonical	TGCTG(A*)T	A	630182	-28	expected	1	1	no	no	yes	1,0,(0)	1,0,(0)	0,0,(0)	0,0,(0)	SRR545719(1;1),
chr16	711319	+	canonical	CACTC(A*)C	A	711341	-22	expected	1	1	no	no	yes	0,0,(1)	0,0,(1)	0,0,(0)	0,0,(0)	SRR545708(1;1),
chr16	723460	+	canonical	TGCAG(A*)T	A	723479	-19	expected	6	4	yes	yes	yes	5,0,(1)	3,0,(1)	5,0,(1)	3,0,(1)	SRR317043(1;1),SRR534317(1;1),SRR534318(4;2),
chr16	1552025	+	canonical	TGCTC(A*)T	A	1552047	-22	expected	5	1	yes	no	yes	0,0,(5)	0,0,(1)	0,0,(5)	0,0,(1)	SRR545720(5;1),
chr16	1779464	+	canonical	CGCTA(A*)T	A	1779487	-23	expected	3	1	yes	no	yes	0,0,(3)	0,0,(1)	0,0,(3)	0,0,(1)	SRR545719(3;1),
chr16	1815940	+	canonical	GGCTG(A*)C	A	1815960	-20	expected	3	1	no	no	yes	3,0,(0)	1,0,(0)	0,0,(0)	0,0,(0)	SRR545694(3;1),
chr16	2108718	+	canonical	TGCTC(A*)C	A	2108747	-29	expected	1	1	yes	no	yes	0,0,(1)	0,0,(1)	0,0,(1)	0,0,(1)	SRR317068(1;1),
chr16	2114248	+	canonical	CGCTC(A*)T	A	2114272	-24	expected	4	3	yes	yes	yes	0,0,(4)	0,0,(3)	0,0,(4)	0,0,(3)	SRR545717(2;1),SRR545718(2;2),
chr16	2122223	+	canonical	TCCTG(A*)C	A	2122241	-18	expected	11	11	yes	yes	yes	8,2,(1)	8,2,(1)	0,2,(1)	0,2,(1)	SRR317043(1;1),SRR317050(1;1),SRR317045(1;1),SRR307913(1;1),SRR315317(1;1),SRR317042(1;1),SRR317039(2;2),SRR317065(2;2),SRR317068(1;1),
chr16	2199987	+	canonical	TGCTG(G*)T	G	2201569	-1582	distal	4	1	no	no	yes	0,4,(0)	0,1,(0)	0,0,(0)	0,0,(0)	SRR534325(4;1),
chr16	2278355	+	canonical	TGCTG(A*)C	A	2278372	-17	expected	1	1	yes	no	yes	0,0,(1)	0,0,(1)	0,0,(1)	0,0,(1)	SRR317057(1;1),
chr16	2284568	+	canonical	CACTG(A*)C	A	2284583	-15	expected	1	1	no	no	yes	1,0,(0)	1,0,(0)	0,0,(0)	0,0,(0)	SRR534318(1;1),
chr16	2807720	+	canonical	TACTT(G*)T	G	2807781	-61	distal	1	1	no	no	yes	0,1,(0)	0,1,(0)	0,0,(0)	0,0,(0)	SRR317043(1;1),
chr16	2871344	+	canonical	GGCTG(A*)C	A	2871366	-22	expected	2	1	no	no	yes	0,2,(0)	0,1,(0)	0,0,(0)	0,0,(0)	SRR317049(2;1),
chr16	2983104	+	canonical	TGGTG(A*)T	A	2983130	-26	expected	1	1	yes	no	yes	0,0,(1)	0,0,(1)	0,0,(1)	0,0,(1)	SRR545714(1;1),
chr16	2988163	+	canonical	CACTC(A*)C	A	2988184	-21	expected	4	1	yes	no	yes	0,0,(4)	0,0,(1)	0,0,(4)	0,0,(1)	SRR545715(4;1),
chr16	3076850	+	canonical	CACTC(A*)C	A	3076867	-17	expected	5	4	yes	yes	yes	0,0,(5)	0,0,(4)	0,0,(2)	0,0,(2)	SRR315305(2;2),SRR768414(1;1),SRR317063(2;1),
chr16	3165337	+	canonical	TGCTG(A*)T	A	3165355	-18	expected	2	1	no	no	yes	2,0,(0)	1,0,(0)	0,0,(0)	0,0,(0)	SRR317050(2;1),
chr16	4495910	+	canonical	TATTT(A*)C	A	4496886	-976	distal	9	3	yes	yes	yes	0,0,(9)	0,0,(3)	0,0,(9)	0,0,(3)	SRR315320(1;1),SRR545712(6;1),SRR545713(2;1),
chr16	4496860	+	canonical	TCTTC(A*)C	A	4496886	-26	expected	2	1	yes	no	yes	0,0,(2)	0,0,(1)	0,0,(2)	0,0,(1)	SRR317063(2;1),
chr16	4732804	+	canonical	TGCCC(A*)C	A	4732823	-19	expected	1	1	no	no	yes	0,1,(0)	0,1,(0)	0,0,(0)	0,0,(0)	SRR545704(1;1),
chr16	8738379	+	canonical	TGATG(A*)T	A	8738413	-34	expected	2	1	yes	no	yes	0,0,(2)	0,0,(1)	0,0,(2)	0,0,(1)	SRR534335(2;1),
chr16	9196806	+	canonical	TGGTC(A*)T	A	9196840	-34	expected	1	1	yes	no	yes	0,0,(1)	0,0,(1)	0,0,(1)	0,0,(1)	SRR317043(1;1),
chr16	11146468	+	canonical	CACTG(A*)C	A	11154758	-8290	distal	1	1	yes	no	yes	0,0,(1)	0,0,(1)	0,0,(1)	0,0,(1)	SRR307914(1;1),
chr16	16141970	+	canonical	CACTC(A*)C	A	16141998	-28	expected	5	1	yes	no	yes	0,0,(5)	0,0,(1)	0,0,(5)	0,0,(1)	SRR534335(5;1),
chr16	16225620	+	canonical	TCCTT(A*)C	A	16225645	-25	expected	1	1	yes	no	yes	0,0,(1)	0,0,(1)	0,0,(1)	0,0,(1)	SRR545703(1;1),
chr16	22261952	+	canonical	TGATA(A*)C	A	22261974	-22	expected	1	1	yes	no	yes	0,0,(1)	0,0,(1)	0,0,(1)	0,0,(1)	SRR545717(1;1),
chr16	23676929	+	canonical	TATTA(A*)C	A	23676946	-17	expected	3	2	no	yes	yes	0,2,(1)	0,1,(1)	0,0,(0)	0,0,(0)	SRR317066(2;1),SRR317036(1;1),
chr16	24769627	+	canonical	TATTT(A*)C	A	24769659	-32	expected	1	1	yes	no	yes	0,0,(1)	0,0,(1)	0,0,(1)	0,0,(1)	SRR545688(1;1),
chr16	24817500	+	canonical	TAGTA(A*)C	A	24817526	-26	expected	9	5	no	yes	yes	0,9,(0)	0,5,(0)	0,0,(0)	0,0,(0)	SRR315317(1;1),SRR545707(2;1),SRR317038(1;1),SRR317062(5;2),
chr16	28838161	+	canonical	TCCTG(A*)T	A	28838182	-21	expected	1	1	yes	no	yes	0,1,(0)	0,1,(0)	0,1,(0)	0,1,(0)	SRR317062(1;1),
chr16	28848014	+	canonical	TTCTA(A*)T	A	28848048	-34	expected	4	2	yes	yes	yes	0,2,(2)	0,1,(1)	0,2,(2)	0,1,(1)	SRR545720(2;1),SRR545718(2;1),
chr16	29842175	+	canonical	TCCTC(A*)C	A	29842198	-23	expected	9	6	yes	yes	yes	0,0,(9)	0,0,(6)	0,0,(4)	0,0,(2)	SRR317044(1;1),SRR534326(1;1),SRR534317(2;2),SRR545719(3;1),SRR317064(2;1),
chr16	30664023	+	canonical	TCTTG(A*)C	A	30664041	-18	expected	2	1	no	no	yes	2,0,(0)	1,0,(0)	0,0,(0)	0,0,(0)	SRR317044(2;1),
chr16	30711885	+	canonical	TTTTC(A*)T	A	30711936	-51	expected	1	1	no	no	yes	0,0,(1)	0,0,(1)	0,0,(0)	0,0,(0)	SRR317042(1;1),
chr16	30753036	+	canonical	GGCTC(A*)C	A	30753061	-25	expected	1	1	yes	no	yes	0,1,(0)	0,1,(0)	0,1,(0)	0,1,(0)	SRR317063(1;1),
chr16	30775268	+	canonical	TATTG(G*)T	G	30775499	-231	distal	1	1	no	no	yes	0,1,(0)	0,1,(0)	0,0,(0)	0,0,(0)	SRR534334(1;1),
chr16	30775475	+	canonical	TCCTC(A*)T	A	30775499	-24	expected	1	1	no	no	yes	0,0,(1)	0,0,(1)	0,0,(0)	0,0,(0)	SRR545709(1;1),
chr16	30779187	+	canonical	TTCTG(A*)C	A	30779214	-27	expected	6	2	yes	yes	yes	5,0,(1)	1,0,(1)	0,0,(1)	0,0,(1)	SRR315305(1;1),SRR534318(5;1),
chr16	30785240	+	canonical	AGCTG(A*)T	A	30785258	-18	expected	1	1	no	no	yes	1,0,(0)	1,0,(0)	0,0,(0)	0,0,(0)	SRR317036(1;1),
chr16	30991808	+	canonical	CACTC(A*)C	A	30992059	-251	distal	1	1	yes	no	yes	1,0,(0)	1,0,(0)	1,0,(0)	1,0,(0)	SRR534311(1;1),
chr16	31193719	+	canonical	TGCAG(A*)T	A	31193833	-114	distal	1	1	no	no	yes	1,0,(0)	1,0,(0)	0,0,(0)	0,0,(0)	SRR317055(1;1),
chr16	47695610	+	canonical	TCCTC(A*)C	A	47695629	-19	expected	10	7	yes	yes	yes	1,0,(9)	1,0,(6)	1,0,(6)	1,0,(4)	SRR534289(1;1),SRR307931(1;1),SRR317036(1;1),SRR545687(2;1),SRR307930(2;1),SRR317062(2;1),SRR317043(1;1),
chr16	50128589	+	canonical	TGCAA(A*)T	A	50128615	-26	expected	5	1	no	no	yes	5,0,(0)	1,0,(0)	0,0,(0)	0,0,(0)	SRR545718(5;1),
chr16	50263032	+	canonical	TACTG(A*)T	A	50263062	-30	expected	9	6	yes	yes	yes	2,0,(7)	2,0,(4)	0,0,(7)	0,0,(4)	SRR545707(1;1),SRR545703(1;1),SRR545718(1;1),SRR534326(1;1),SRR545717(3;1),SRR534327(2;1),
chr16	50339388	+	canonical	TGCTG(A*)T	A	50339413	-25	expected	1	1	no	no	yes	1,0,(0)	1,0,(0)	0,0,(0)	0,0,(0)	SRR317052(1;1),
chr16	50343436	+	canonical	GACTG(A*)T	A	50343458	-22	expected	1	1	yes	no	yes	0,0,(1)	0,0,(1)	0,0,(1)	0,0,(1)	SRR307921(1;1),
chr16	50815136	+	canonical	TGCAT(A*)T	A	50815156	-20	expected	1	1	yes	no	yes	1,0,(0)	1,0,(0)	1,0,(0)	1,0,(0)	SRR545690(1;1),
chr16	53320078	+	canonical	TGCTT(A*)T	A	53320137	-59	expected	3	2	yes	yes	yes	0,0,(3)	0,0,(2)	0,0,(3)	0,0,(2)	SRR317042(1;1),SRR534325(2;1),
chr16	53320103	+	canonical	TTTTT(A*)T	A	53320137	-34	expected	1	1	no	no	yes	1,0,(0)	1,0,(0)	0,0,(0)	0,0,(0)	SRR317045(1;1),
chr16	53320112	+	canonical	TTTTT(A*)C	A	53320137	-25	expected	10	1	no	no	yes	10,0,(0)	1,0,(0)	0,0,(0)	0,0,(0)	SRR545712(10;1),
chr16	53487332	+	canonical	TGCTG(A*)T	A	53487363	-31	expected	1	1	no	no	yes	1,0,(0)	1,0,(0)	0,0,(0)	0,0,(0)	SRR307931(1;1),
chr16	56642881	+	canonical	TTCTC(A*)C	A	56642903	-22	expected	21	7	yes	yes	yes	0,0,(21)	0,0,(7)	0,0,(14)	0,0,(4)	SRR545721(3;1),SRR317047(1;1),SRR545714(6;2),SRR545713(5;1),SRR545694(6;2),
chr16	56642904	+	canonical	TGCAG(G*)T	G	56643174	-270	distal	7	2	no	yes	yes	7,0,(0)	2,0,(0)	0,0,(0)	0,0,(0)	SRR545715(2;1),SRR534327(5;1),
chr16	56872825	+	canonical	TCCTG(A*)T	A	56872863	-38	expected	1	1	no	no	yes	1,0,(0)	1,0,(0)	0,0,(0)	0,0,(0)	SRR307922(1;1),
chr16	56920244	+	canonical	TCCTG(A*)T	A	56920275	-31	expected	1	1	no	no	yes	1,0,(0)	1,0,(0)	0,0,(0)	0,0,(0)	SRR307914(1;1),
chr16	57059256	+	canonical	TCCTC(A*)T	A	57059279	-23	expected	2	2	yes	yes	yes	0,0,(2)	0,0,(2)	0,0,(2)	0,0,(2)	SRR545692(1;1),SRR534317(1;1),
chr16	57153449	+	canonical	AGCTC(A*)C	A	57153472	-23	expected	14	7	yes	yes	yes	0,0,(14)	0,0,(7)	0,0,(10)	0,0,(5)	SRR317065(1;1),SRR534318(6;2),SRR545717(3;1),SRR317064(1;1),SRR545705(2;1),SRR317050(1;1),
chr16	57269002	+	canonical	TGTTG(A*)C	A	57269035	-33	expected	1	1	yes	no	yes	0,0,(1)	0,0,(1)	0,0,(1)	0,0,(1)	SRR317038(1;1),
chr16	57503052	+	canonical	GACTC(A*)T	A	57503076	-24	expected	1	1	yes	no	yes	0,0,(1)	0,0,(1)	0,0,(1)	0,0,(1)	SRR307922(1;1),
chr16	57609254	+	canonical	TGCCC(A*)T	A	57609349	-95	distal	2	1	no	no	yes	0,2,(0)	0,1,(0)	0,0,(0)	0,0,(0)	SRR317057(2;1),
chr16	58541679	+	canonical	TGCCC(A*)C	A	58541711	-32	expected	1	1	no	no	yes	0,1,(0)	0,1,(0)	0,0,(0)	0,0,(0)	SRR315318(1;1),
chr16	67228548	+	canonical	TGCTT(A*)C	A	67228588	-40	expected	3	3	yes	yes	yes	0,0,(3)	0,0,(3)	0,0,(2)	0,0,(2)	SRR317042(1;1),SRR317059(1;1),SRR317043(1;1),
chr16	67289276	+	canonical	TGCTG(A*)C	A	67289295	-19	expected	1	1	no	no	yes	1,0,(0)	1,0,(0)	0,0,(0)	0,0,(0)	SRR317044(1;1),
chr16	68112309	+	canonical	GGCTC(A*)T	A	68112347	-38	expected	5	4	yes	yes	yes	0,0,(5)	0,0,(4)	0,0,(5)	0,0,(4)	SRR317065(1;1),SRR315308(2;2),SRR307914(2;1),
chr16	68283169	+	canonical	GGCTC(A*)C	A	68283192	-23	expected	1	1	yes	no	yes	0,0,(1)	0,0,(1)	0,0,(1)	0,0,(1)	SRR545694(1;1),
chr16	68943087	+	canonical	TCTTC(A*)C	A	68943113	-26	expected	2	1	yes	no	yes	0,0,(2)	0,0,(1)	0,0,(2)	0,0,(1)	SRR545718(2;1),
chr16	69680909	+	canonical	TATTT(A*)C	A	69680930	-21	expected	1	1	yes	no	yes	0,0,(1)	0,0,(1)	0,0,(1)	0,0,(1)	SRR545719(1;1),
chr16	69689478	+	canonical	TACTA(A*)T	A	69689511	-33	expected	1	1	yes	no	yes	0,0,(1)	0,0,(1)	0,0,(1)	0,0,(1)	SRR317068(1;1),
chr16	70499006	+	canonical	TGTTC(A*)C	A	70499028	-22	expected	1	1	no	no	yes	0,1,(0)	0,1,(0)	0,0,(0)	0,0,(0)	SRR307914(1;1),
chr16	70566350	+	canonical	TGCTG(A*)T	A	70566381	-31	expected	2	2	no	yes	yes	2,0,(0)	2,0,(0)	0,0,(0)	0,0,(0)	SRR315305(1;1),SRR545691(1;1),
chr16	70572978	+	canonical	TGTTT(G*)T	G	70573006	-28	expected	2	1	no	no	yes	2,0,(0)	1,0,(0)	0,0,(0)	0,0,(0)	SRR317050(2;1),
chr16	70590767	+	canonical	TTTTT(A*)T	A	70590788	-21	expected	3	3	yes	yes	yes	0,0,(3)	0,0,(3)	0,0,(3)	0,0,(3)	SRR545717(1;1),SRR307930(1;1),SRR534325(1;1),
chr16	70595484	+	canonical	TATTT(G*)T	G	70595532	-48	expected	1	1	no	no	yes	0,1,(0)	0,1,(0)	0,0,(0)	0,0,(0)	SRR545719(1;1),
chr16	72057036	+	canonical	GACTC(A*)T	A	72057063	-27	expected	4	2	yes	yes	yes	0,0,(4)	0,0,(2)	0,0,(1)	0,0,(1)	SRR545718(3;1),SRR307921(1;1),
chr16	77228192	+	canonical	TCCTG(A*)T	A	77228231	-39	expected	1	1	yes	no	yes	0,1,(0)	0,1,(0)	0,1,(0)	0,1,(0)	SRR545717(1;1),
chr16	81062131	+	canonical	TGATG(A*)C	A	81062173	-42	expected	4	1	no	no	yes	4,0,(0)	1,0,(0)	0,0,(0)	0,0,(0)	SRR307913(4;1),
chr16	81705546	+	canonical	TTCTC(A*)C	A	81705570	-24	expected	6	6	yes	yes	yes	0,1,(5)	0,1,(5)	0,0,(4)	0,0,(4)	SRR545717(2;2),SRR315306(1;1),SRR317048(1;1),SRR317062(1;1),SRR317064(1;1),
chr16	81740594	+	canonical	TCCTA(A*)C	A	81740618	-24	expected	1	1	yes	no	yes	1,0,(0)	1,0,(0)	1,0,(0)	1,0,(0)	SRR534317(1;1),
chr16	85689309	+	canonical	TGCTC(A*)C	A	85689331	-22	expected	8	6	yes	yes	yes	1,0,(7)	1,0,(5)	0,0,(7)	0,0,(5)	SRR317063(1;1),SRR317050(1;1),SRR545720(4;2),SRR307914(1;1),SRR317062(1;1),
chr16	85839300	+	canonical	TGCTG(A*)C	A	85839338	-38	expected	4	3	no	yes	yes	4,0,(0)	3,0,(0)	0,0,(0)	0,0,(0)	SRR545720(1;1),SRR317064(2;1),SRR315305(1;1),
chr16	88068906	+	canonical	TGCTT(C*)T	C	88068928	-22	expected	2	1	no	no	yes	0,2,(0)	0,1,(0)	0,0,(0)	0,0,(0)	SRR545706(2;1),
chr16	88666175	+	canonical	TGTTG(A*)C	A	88666198	-23	expected	2	1	yes	no	yes	0,0,(2)	0,0,(1)	0,0,(2)	0,0,(1)	SRR317051(2;1),
chr16	88695144	+	canonical	TCCTC(A*)C	A	88695165	-21	expected	1	1	yes	no	yes	0,0,(1)	0,0,(1)	0,0,(1)	0,0,(1)	SRR317051(1;1),
chr16	89616882	+	canonical	AACTC(A*)T	A	89616901	-19	expected	8	3	no	yes	yes	4,0,(4)	1,0,(2)	0,0,(0)	0,0,(0)	SRR307914(5;2),SRR545709(3;1),
chr16	89761681	+	canonical	CACTA(A*)C	A	89761700	-19	expected	4	4	yes	yes	yes	0,0,(4)	0,0,(4)	0,0,(3)	0,0,(3)	SRR315311(1;1),SRR317051(1;1),SRR317042(1;1),SRR317067(1;1),
chr16	89782842	+	canonical	GGCTC(A*)T	A	89782878	-36	expected	1	1	yes	no	yes	0,0,(1)	0,0,(1)	0,0,(1)	0,0,(1)	SRR317043(1;1),
chr16	89971913	+	canonical	AACTG(A*)C	A	89972601	-688	distal	1	1	no	no	yes	1,0,(0)	1,0,(0)	0,0,(0)	0,0,(0)	SRR317051(1;1),
chr16	90021546	+	canonical	AGCTG(A*)C	A	90021576	-30	expected	14	3	yes	yes	yes	2,0,(12)	2,0,(1)	0,0,(12)	0,0,(1)	SRR545685(12;1),SRR534289(1;1),SRR545692(1;1),
chr16	90050917	+	canonical	TGCTG(A*)T	A	90050938	-21	expected	4	2	no	yes	yes	4,0,(0)	2,0,(0)	0,0,(0)	0,0,(0)	SRR315305(1;1),SRR317049(3;1),
chr17	976012	-	canonical	AACTC(A*)C	A	975994	-18	expected	2	2	no	yes	yes	0,1,(1)	0,1,(1)	0,0,(0)	0,0,(0)	SRR317064(1;1),SRR317058(1;1),
chr17	2090141	-	canonical	TTCTC(A*)C	A	2090125	-16	expected	3	1	no	no	yes	0,0,(3)	0,0,(1)	0,0,(0)	0,0,(0)	SRR545714(3;1),
chr17	2297471	-	canonical	CGCTG(A*)C	A	2297448	-23	expected	1	1	no	no	yes	1,0,(0)	1,0,(0)	0,0,(0)	0,0,(0)	SRR545711(1;1),
chr17	2381210	-	canonical	TACTA(A*)T	A	2381179	-31	expected	5	4	yes	yes	yes	4,1,(0)	3,1,(0)	0,1,(0)	0,1,(0)	SRR545718(1;1),SRR545689(1;1),SRR545687(1;1),SRR545690(2;1),
chr17	3592075	-	canonical	TGCTG(A*)C	A	3592053	-22	expected	2	1	no	no	yes	2,0,(0)	1,0,(0)	0,0,(0)	0,0,(0)	SRR534325(2;1),
chr17	3989118	-	canonical	AGCTG(A*)T	A	3989097	-21	expected	9	2	no	yes	yes	9,0,(0)	2,0,(0)	0,0,(0)	0,0,(0)	SRR534318(2;1),SRR545703(7;1),
chr17	4087239	-	canonical	TGGTG(A*)C	A	4087205	-34	expected	3	3	yes	yes	yes	0,1,(2)	0,1,(2)	0,0,(2)	0,0,(2)	SRR317064(1;1),SRR307931(1;1),SRR545716(1;1),
chr17	4446486	-	canonical	TTCTG(A*)C	A	4446460	-26	expected	12	5	yes	yes	yes	1,0,(11)	1,0,(4)	0,0,(11)	0,0,(4)	SRR315308(1;1),SRR317049(1;1),SRR545708(2;1),SRR545715(7;1),SRR545711(1;1),
chr17	4585902	-	canonical	TGCTC(G*)C	G	4585868	-34	expected	2	1	no	no	yes	0,2,(0)	0,1,(0)	0,0,(0)	0,0,(0)	SRR315317(2;1),
chr17	7099918	-	canonical	TGGTG(A*)C	A	7099894	-24	expected	3	1	no	no	yes	0,3,(0)	0,1,(0)	0,0,(0)	0,0,(0)	SRR545694(3;1),
chr17	7495285	-	canonical	TACTC(A*)C	A	7495243	-42	expected	1	1	no	no	yes	1,0,(0)	1,0,(0)	0,0,(0)	0,0,(0)	SRR317039(1;1),
chr17	7498100	-	canonical	TAGTA(A*)C	A	7498075	-25	expected	2	1	no	no	yes	0,2,(0)	0,1,(0)	0,0,(0)	0,0,(0)	SRR534334(2;1),
chr17	8046190	-	canonical	TGCTG(A*)C	A	8046153	-37	expected	4	2	yes	yes	yes	0,0,(4)	0,0,(2)	0,0,(4)	0,0,(2)	SRR545702(3;1),SRR317051(1;1),
chr17	8047213	-	canonical	TGCTA(A*)C	A	8047194	-19	expected	1	1	yes	no	yes	0,0,(1)	0,0,(1)	0,0,(1)	0,0,(1)	SRR545690(1;1),
chr17	8108727	-	canonical	TGCCC(A*)C	A	8108708	-19	expected	15	12	yes	yes	yes	0,15,(0)	0,12,(0)	0,9,(0)	0,8,(0)	SRR545720(1;1),SRR307921(1;1),SRR545701(1;1),SRR545704(3;1),SRR317049(2;2),SRR534334(2;2),SRR545716(1;1),SRR545706(2;1),SRR317065(1;1),SRR534289(1;1),
chr17	8134816	-	canonical	CACTC(A*)C	A	8134787	-29	expected	1	1	no	no	yes	0,1,(0)	0,1,(0)	0,0,(0)	0,0,(0)	SRR545718(1;1),
chr17	8379307	-	canonical	TGCTC(C*)T	C	8379266	-41	expected	1	1	yes	no	yes	0,0,(1)	0,0,(1)	0,0,(1)	0,0,(1)	SRR315317(1;1),
chr17	8492462	-	canonical	TGGTC(A*)C	A	8492426	-36	expected	2	1	yes	no	yes	0,0,(2)	0,0,(1)	0,0,(2)	0,0,(1)	SRR545707(2;1),
chr17	8812517	-	canonical	AACTG(A*)C	A	8812491	-26	expected	1	1	no	no	yes	1,0,(0)	1,0,(0)	0,0,(0)	0,0,(0)	SRR534312(1;1),
chr17	8814846	-	canonical	AGCTG(A*)C	A	8814824	-22	expected	2	1	yes	no	yes	0,0,(2)	0,0,(1)	0,0,(2)	0,0,(1)	SRR545688(2;1),
chr17	12899320	-	canonical	GGCTG(A*)C	A	12899295	-25	expected	1	1	yes	no	yes	0,0,(1)	0,0,(1)	0,0,(1)	0,0,(1)	SRR317043(1;1),
chr17	15965618	-	canonical	TCCTT(A*)T	A	15965584	-34	expected	3	2	yes	yes	yes	0,0,(3)	0,0,(2)	0,0,(3)	0,0,(2)	SRR545718(2;1),SRR534318(1;1),
chr17	16029539	-	canonical	TACAA(A*)T	A	16029523	-16	expected	3	1	no	no	yes	3,0,(0)	1,0,(0)	0,0,(0)	0,0,(0)	SRR545706(3;1),
chr17	17715121	-	canonical	TTCTC(A*)C	A	17715098	-23	expected	1	1	yes	no	yes	0,0,(1)	0,0,(1)	0,0,(1)	0,0,(1)	SRR317051(1;1),
chr17	17717108	-	canonical	TGGTG(A*)C	A	17717083	-25	expected	9	5	yes	yes	yes	0,5,(4)	0,2,(3)	0,0,(2)	0,0,(2)	SRR534317(2;2),SRR317043(1;1),SRR545685(2;1),SRR545711(4;1),
chr17	17723859	-	canonical	CACTC(A*)C	A	17723835	-24	expected	1	1	yes	no	yes	0,0,(1)	0,0,(1)	0,0,(1)	0,0,(1)	SRR545706(1;1),
chr17	18181700	-	canonical	TGTTA(A*)T	A	18181671	-29	expected	5	1	yes	no	yes	0,0,(5)	0,0,(1)	0,0,(5)	0,0,(1)	SRR545702(5;1),
chr17	18250996	-	canonical	TAATC(A*)T	A	18250970	-26	expected	7	1	yes	no	yes	0,0,(7)	0,0,(1)	0,0,(7)	0,0,(1)	SRR545712(7;1),
chr17	19813315	-	canonical	TGTAC(A*)T	A	19813291	-24	expected	2	2	yes	yes	yes	1,0,(1)	1,0,(1)	1,0,(1)	1,0,(1)	SRR317046(1;1),SRR317050(1;1),
chr17	19843198	-	canonical	TGTTT(A*)T	A	19843162	-36	expected	1	1	no	no	yes	0,0,(1)	0,0,(1)	0,0,(0)	0,0,(0)	SRR545721(1;1),
chr17	20914649	-	canonical	TCCTC(A*)C	A	20914622	-27	expected	8	2	no	yes	yes	0,0,(8)	0,0,(2)	0,0,(0)	0,0,(0)	SRR545712(6;1),SRR545694(2;1),
chr17	20919240	-	canonical	TCCTG(A*)C	A	20919212	-28	expected	2	2	no	yes	yes	2,0,(0)	2,0,(0)	0,0,(0)	0,0,(0)	SRR317040(1;1),SRR307931(1;1),
chr17	21114567	-	canonical	TGTTG(A*)T	A	21114540	-27	expected	3	1	yes	no	yes	0,0,(3)	0,0,(1)	0,0,(3)	0,0,(1)	SRR545705(3;1),
chr17	21146688	-	canonical	TGCTG(G*)T	G	21114540	-32148	distal	1	1	no	no	yes	0,1,(0)	0,1,(0)	0,0,(0)	0,0,(0)	SRR545701(1;1),
chr17	26905800	-	canonical	TCTTC(A*)T	A	26905770	-30	expected	12	2	yes	no	yes	0,0,(12)	0,0,(2)	0,0,(12)	0,0,(2)	SRR317056(12;2),
chr17	26947054	-	canonical	TATTC(A*)T	A	26947033	-21	expected	1	1	yes	no	yes	0,0,(1)	0,0,(1)	0,0,(1)	0,0,(1)	SRR317043(1;1),
chr17	26965137	-	canonical	TTCTA(A*)T	A	26965112	-25	expected	1	1	yes	no	yes	0,0,(1)	0,0,(1)	0,0,(1)	0,0,(1)	SRR317058(1;1),
chr17	26969373	-	canonical	TGCTC(T*)T	T	26969353	-20	expected	43	26	no	yes	yes	35,8,(0)	22,4,(0)	0,0,(0)	0,0,(0)	SRR534335(1;1),SRR317058(1;1),SRR534317(1;1),SRR307931(1;1),SRR534318(1;1),SRR534289(3;3),SRR534325(1;1),SRR307914(3;2),SRR545706(3;1),SRR307930(1;1),SRR317062(6;2),SRR317049(4;2),SRR315320(3;1),SRR317039(1;1),SRR545692(3;1),SRR545720(1;1),SRR307921(1;1),SRR317045(2;1),SRR315312(2;2),SRR317063(4;1),
chr17	27043105	-	canonical	TGCCC(A*)C	A	27043079	-26	expected	1	1	yes	no	yes	0,1,(0)	0,1,(0)	0,1,(0)	0,1,(0)	SRR315317(1;1),
chr17	27409491	-	canonical	TGCCT(A*)T	A	27409456	-35	expected	1	1	yes	no	yes	0,0,(1)	0,0,(1)	0,0,(1)	0,0,(1)	SRR317051(1;1),
chr17	27412687	-	canonical	TGCCC(A*)C	A	27412666	-21	expected	2	1	no	no	yes	0,2,(0)	0,1,(0)	0,0,(0)	0,0,(0)	SRR534326(2;1),
chr17	27419509	-	canonical	GGCTG(A*)C	A	27419474	-35	expected	1	1	yes	no	yes	0,0,(1)	0,0,(1)	0,0,(1)	0,0,(1)	SRR545691(1;1),
chr17	27424008	-	canonical	CACTC(A*)C	A	27423933	-75	distal	1	1	yes	no	yes	0,0,(1)	0,0,(1)	0,0,(1)	0,0,(1)	SRR545719(1;1),
chr17	27441139	-	canonical	TGCTC(A*)C	A	27441115	-24	expected	1	1	yes	no	yes	0,0,(1)	0,0,(1)	0,0,(1)	0,0,(1)	SRR545706(1;1),
chr17	27446478	-	canonical	TCCTT(A*)C	A	27446453	-25	expected	1	1	yes	no	yes	0,0,(1)	0,0,(1)	0,0,(1)	0,0,(1)	SRR315318(1;1),
chr17	27903715	-	canonical	TGCTG(A*)C	A	27903692	-23	expected	3	2	no	yes	yes	3,0,(0)	2,0,(0)	0,0,(0)	0,0,(0)	SRR317051(2;1),SRR317041(1;1),
chr17	33339208	-	canonical	TCCTC(A*)C	A	33339168	-40	expected	3	2	yes	yes	yes	0,0,(3)	0,0,(2)	0,0,(3)	0,0,(2)	SRR317063(1;1),SRR307921(2;1),
chr17	33463267	-	canonical	TCCTC(A*)T	A	33463234	-33	expected	1	1	no	no	yes	1,0,(0)	1,0,(0)	0,0,(0)	0,0,(0)	SRR545720(1;1),
chr17	34106110	-	canonical	CACTC(A*)C	A	34106079	-31	expected	2	1	yes	no	yes	0,0,(2)	0,0,(1)	0,0,(2)	0,0,(1)	SRR317036(2;1),
chr17	34862999	-	canonical	GGCTG(A*)C	A	34862978	-21	expected	105	64	yes	yes	yes	65,15,(25)	40,9,(15)	1,0,(20)	1,0,(11)	SRR545694(2;1),SRR317043(7;5),SRR317050(2;1),SRR317044(2;2),SRR307921(1;1),SRR317045(1;1),SRR317063(7;5),SRR317057(7;1),SRR317046(1;1),SRR545692(1;1),SRR545691(3;2),SRR545703(1;1),SRR317039(2;2),SRR315310(1;1),SRR317049(3;2),SRR545701(1;1),SRR307930(1;1),SRR317062(12;4),SRR545708(3;2),SRR545713(9;2),SRR307924(1;1),SRR545717(1;1),SRR307923(1;1),SRR317040(3;3),SRR315318(1;1),SRR534334(2;1),SRR30791…
chr17	34863006	-	canonical	TGTTG(G*)T	G	34862978	-28	expected	4	3	no	yes	yes	0,4,(0)	0,3,(0)	0,0,(0)	0,0,(0)	SRR307923(1;1),SRR307921(1;1),SRR307930(2;1),
chr17	34869378	-	canonical	TGCTG(A*)C	A	34869348	-30	expected	2	2	yes	no	yes	0,0,(2)	0,0,(2)	0,0,(2)	0,0,(2)	SRR545685(2;2),
chr17	35444397	-	canonical	TCTTC(A*)C	A	35444374	-23	expected	1	1	yes	no	yes	0,0,(1)	0,0,(1)	0,0,(1)	0,0,(1)	SRR317044(1;1),
chr17	35482745	-	canonical	TCCTT(A*)T	A	35482715	-30	expected	1	1	no	no	yes	0,1,(0)	0,1,(0)	0,0,(0)	0,0,(0)	SRR534335(1;1),
chr17	35563821	-	canonical	TTTTC(A*)T	A	35563793	-28	expected	1	1	yes	no	yes	0,0,(1)	0,0,(1)	0,0,(1)	0,0,(1)	SRR315310(1;1),
chr17	35578785	-	canonical	TATTT(A*)C	A	35578763	-22	expected	7	5	yes	yes	yes	0,0,(7)	0,0,(5)	0,0,(6)	0,0,(4)	SRR545714(2;1),SRR317042(1;1),SRR317055(1;1),SRR317051(2;1),SRR315320(1;1),
chr17	36716048	-	canonical	GGCTC(A*)C	A	36716008	-40	expected	4	2	no	yes	yes	0,0,(4)	0,0,(2)	0,0,(0)	0,0,(0)	SRR317045(1;1),SRR317044(3;1),
chr17	36891897	-	canonical	TCCTG(A*)T	A	36891853	-44	expected	25	4	no	yes	yes	25,0,(0)	4,0,(0)	0,0,(0)	0,0,(0)	SRR317062(2;1),SRR317056(20;1),SRR317051(1;1),SRR545694(2;1),
chr17	36895530	-	canonical	TGCTG(A*)T	A	36895506	-24	expected	5	5	no	yes	yes	5,0,(0)	5,0,(0)	0,0,(0)	0,0,(0)	SRR315318(1;1),SRR545718(2;2),SRR317063(1;1),SRR545701(1;1),
chr17	37006496	-	canonical	TTTTT(A*)T	A	37006467	-29	expected	2	1	no	no	yes	2,0,(0)	1,0,(0)	0,0,(0)	0,0,(0)	SRR545709(2;1),
chr17	38563957	-	canonical	TATAA(A*)C	A	38563926	-31	expected	3	1	yes	no	yes	3,0,(0)	1,0,(0)	3,0,(0)	1,0,(0)	SRR545702(3;1),
chr17	39680812	-	canonical	TGCCC(A*)T	A	39680792	-20	expected	6	1	yes	no	yes	0,0,(6)	0,0,(1)	0,0,(6)	0,0,(1)	SRR317057(6;1),
chr17	39777372	-	canonical	GGCTC(A*)C	A	39777343	-29	expected	1	1	yes	no	yes	0,0,(1)	0,0,(1)	0,0,(1)	0,0,(1)	SRR317047(1;1),
chr17	39925487	-	canonical	TGCTC(A*)C	A	39925459	-28	expected	1	1	yes	no	yes	0,0,(1)	0,0,(1)	0,0,(1)	0,0,(1)	SRR317043(1;1),
chr17	39963160	-	canonical	GGCTC(A*)C	A	39963131	-29	expected	1	1	no	no	yes	0,1,(0)	0,1,(0)	0,0,(0)	0,0,(0)	SRR317050(1;1),
chr17	40028467	-	canonical	TGTCG(A*)C	A	40028435	-32	expected	1	1	yes	no	yes	0,0,(1)	0,0,(1)	0,0,(1)	0,0,(1)	SRR317064(1;1),
chr17	40040546	-	canonical	TCCTG(A*)T	A	40040527	-19	expected	3	3	yes	yes	yes	1,0,(2)	1,0,(2)	1,0,(2)	1,0,(2)	SRR315310(1;1),SRR545723(1;1),SRR307931(1;1),
chr17	40058087	-	canonical	TAGTC(A*)C	A	40058066	-21	expected	1	1	yes	no	yes	0,0,(1)	0,0,(1)	0,0,(1)	0,0,(1)	SRR315310(1;1),
chr17	40070171	-	canonical	TTCTG(A*)C	A	40070153	-18	expected	1	1	yes	no	yes	0,0,(1)	0,0,(1)	0,0,(1)	0,0,(1)	SRR545720(1;1),
chr17	40280841	-	canonical	TGCCC(A*)T	A	40280818	-23	expected	1	1	no	no	yes	0,0,(1)	0,0,(1)	0,0,(0)	0,0,(0)	SRR317042(1;1),
chr17	40491454	-	canonical	TGTTC(A*)C	A	40491427	-27	expected	1	1	no	no	yes	0,0,(1)	0,0,(1)	0,0,(0)	0,0,(0)	SRR545720(1;1),
chr17	40822415	-	canonical	CACTG(A*)C	A	40822394	-21	expected	6	6	yes	yes	yes	3,2,(1)	3,2,(1)	0,2,(1)	0,2,(1)	SRR315307(1;1),SRR315317(1;1),SRR317039(1;1),SRR317051(1;1),SRR545694(1;1),SRR317063(1;1),
chr17	40872490	-	canonical	TGCTC(A*)T	A	40872467	-23	expected	1	1	no	no	yes	0,0,(1)	0,0,(1)	0,0,(0)	0,0,(0)	SRR307930(1;1),
chr17	40972882	-	canonical	TTCTG(A*)C	A	40972859	-23	expected	1	1	yes	no	yes	0,0,(1)	0,0,(1)	0,0,(1)	0,0,(1)	SRR545688(1;1),
chr17	41247964	-	canonical	TTCTT(A*)T	A	41247939	-25	expected	1	1	yes	no	yes	0,0,(1)	0,0,(1)	0,0,(1)	0,0,(1)	SRR317042(1;1),
chr17	41606134	-	canonical	GGCTG(A*)C	A	41606111	-23	expected	1	1	no	no	yes	1,0,(0)	1,0,(0)	0,0,(0)	0,0,(0)	SRR317043(1;1),
chr17	41909331	-	canonical	TACCC(A*)C	A	41909311	-20	expected	3	1	no	no	yes	0,3,(0)	0,1,(0)	0,0,(0)	0,0,(0)	SRR545694(3;1),
chr17	41981883	-	canonical	TGCTC(A*)T	A	41981861	-22	expected	4	1	yes	no	yes	0,0,(4)	0,0,(1)	0,0,(4)	0,0,(1)	SRR545705(4;1),
chr17	42272522	-	canonical	AGCTT(A*)T	A	42272508	-14	expected	6	1	no	no	yes	0,6,(0)	0,1,(0)	0,0,(0)	0,0,(0)	SRR545719(6;1),
chr17	42287861	-	canonical	GGCTG(A*)C	A	42287841	-20	expected	26	12	yes	yes	yes	3,0,(23)	3,0,(9)	0,0,(21)	0,0,(8)	SRR545712(15;3),SRR534335(1;1),SRR545691(3;2),SRR545718(1;1),SRR545717(4;4),SRR534334(2;1),
chr17	42932395	-	canonical	TCCTT(A*)C	A	42932372	-23	expected	1	1	yes	no	yes	0,0,(1)	0,0,(1)	0,0,(1)	0,0,(1)	SRR307924(1;1),
chr17	42941174	-	canonical	TATTA(A*)T	A	42941150	-24	expected	1	1	yes	no	yes	0,0,(1)	0,0,(1)	0,0,(1)	0,0,(1)	SRR317068(1;1),
chr17	42949956	-	canonical	TGTTC(A*)C	A	42949938	-18	expected	6	4	yes	yes	yes	0,0,(6)	0,0,(4)	0,0,(6)	0,0,(4)	SRR317042(1;1),SRR307930(2;2),SRR317049(3;1),
chr17	42959111	-	canonical	TGGTA(A*)C	A	42959090	-21	expected	7	2	yes	yes	yes	0,2,(5)	0,1,(1)	0,2,(0)	0,1,(0)	SRR545714(5;1),SRR317054(2;1),
chr17	43004476	-	canonical	TGCTG(A*)T	A	43004446	-30	expected	9	2	no	yes	yes	9,0,(0)	2,0,(0)	0,0,(0)	0,0,(0)	SRR545719(7;1),SRR545694(2;1),
chr17	45259026	-	canonical	TATTT(A*)T	A	45259003	-23	expected	1	1	yes	no	yes	0,0,(1)	0,0,(1)	0,0,(1)	0,0,(1)	SRR534318(1;1),
chr17	46628591	-	canonical	TAATT(A*)T	A	46628543	-48	expected	1	1	yes	no	yes	0,0,(1)	0,0,(1)	0,0,(1)	0,0,(1)	SRR315318(1;1),
chr17	47684755	-	canonical	TTCTC(A*)T	A	47684734	-21	expected	1	1	no	no	yes	0,0,(1)	0,0,(1)	0,0,(0)	0,0,(0)	SRR534317(1;1),
chr17	47753408	-	canonical	TGCTT(A*)G	A	47753378	-30	expected	1	1	yes	no	yes	0,0,(1)	0,0,(1)	0,0,(1)	0,0,(1)	SRR315311(1;1),
chr17	48263408	-	canonical	GGCTC(A*)C	A	48263381	-27	expected	4	1	yes	no	yes	0,0,(4)	0,0,(1)	0,0,(4)	0,0,(1)	SRR534335(4;1),
chr17	48269414	-	canonical	TGCTC(A*)C	A	48269385	-29	expected	2	2	yes	yes	yes	0,0,(2)	0,0,(2)	0,0,(1)	0,0,(1)	SRR317064(1;1),SRR545706(1;1),
chr17	48271563	-	canonical	CACTC(A*)T	A	48271544	-19	expected	10	8	yes	yes	yes	0,0,(10)	0,0,(8)	0,0,(9)	0,0,(7)	SRR317065(5;4),SRR317064(5;4),
chr17	48272482	-	canonical	AGCTC(A*)T	A	48272461	-21	expected	1	1	no	no	yes	0,0,(1)	0,0,(1)	0,0,(0)	0,0,(0)	SRR315318(1;1),
chr17	48273357	-	canonical	CGCTG(A*)C	A	48273337	-20	expected	4	3	no	yes	yes	4,0,(0)	3,0,(0)	0,0,(0)	0,0,(0)	SRR317065(3;2),SRR317064(1;1),
chr17	48273911	-	canonical	TTCTC(A*)C	A	48273889	-22	expected	4	3	yes	no	yes	0,0,(4)	0,0,(3)	0,0,(4)	0,0,(3)	SRR534326(4;3),
chr17	49097641	-	canonical	TGTTT(A*)T	A	49097619	-22	expected	2	1	yes	no	yes	0,0,(2)	0,0,(1)	0,0,(2)	0,0,(1)	SRR545685(2;1),
chr17	49279466	-	canonical	TGCTG(A*)C	A	49279438	-28	expected	3	3	yes	yes	yes	2,1,(0)	2,1,(0)	0,1,(0)	0,1,(0)	SRR534289(1;1),SRR317050(1;1),SRR317046(1;1),
chr17	53491617	-	canonical	TTCTT(A*)C	A	53491593	-24	expected	1	1	yes	no	yes	0,0,(1)	0,0,(1)	0,0,(1)	0,0,(1)	SRR307913(1;1),
chr17	56288409	-	canonical	TGCTG(A*)T	A	56288383	-26	expected	1	1	yes	no	yes	0,0,(1)	0,0,(1)	0,0,(1)	0,0,(1)	SRR534318(1;1),
chr17	56293638	-	canonical	TAATG(A*)T	A	56293604	-34	expected	4	1	no	no	yes	4,0,(0)	1,0,(0)	0,0,(0)	0,0,(0)	SRR545694(4;1),
chr17	56387548	-	canonical	TCCTT(A*)T	A	56387519	-29	expected	1	1	yes	no	yes	0,0,(1)	0,0,(1)	0,0,(1)	0,0,(1)	SRR545690(1;1),
chr17	58127103	-	canonical	TAGTT(A*)T	A	58127063	-40	expected	1	1	no	no	yes	0,0,(1)	0,0,(1)	0,0,(0)	0,0,(0)	SRR545687(1;1),
chr17	58529431	-	canonical	TAATG(A*)T	A	58529406	-25	expected	1	1	yes	no	yes	0,0,(1)	0,0,(1)	0,0,(1)	0,0,(1)	SRR545719(1;1),
chr17	58538172	-	canonical	TATTG(A*)C	A	58538148	-24	expected	3	2	no	no	yes	3,0,(0)	2,0,(0)	0,0,(0)	0,0,(0)	SRR545703(3;2),
chr17	60060525	-	canonical	TACTA(A*)T	A	60060475	-50	expected	3	1	yes	no	yes	0,0,(3)	0,0,(1)	0,0,(3)	0,0,(1)	SRR545715(3;1),
chr17	60111370	-	canonical	TACTT(A*)T	A	60111345	-25	expected	4	2	yes	yes	yes	0,1,(3)	0,1,(1)	0,0,(3)	0,0,(1)	SRR545714(4;2),
chr17	61513173	-	canonical	TCCTC(A*)T	A	61513152	-21	expected	1	1	yes	no	yes	0,1,(0)	0,1,(0)	0,1,(0)	0,1,(0)	SRR317063(1;1),
chr17	61790909	-	canonical	TGCGT(A*)T	A	61790887	-22	expected	2	1	yes	no	yes	0,0,(2)	0,0,(1)	0,0,(2)	0,0,(1)	SRR307914(2;1),
chr17	62496962	-	canonical	TTTTT(A*)T	A	62496891	-71	distal	1	1	no	no	yes	0,0,(1)	0,0,(1)	0,0,(0)	0,0,(0)	SRR545716(1;1),
chr17	62557748	-	canonical	TAGTA(A*)T	A	62557721	-27	expected	4	2	no	yes	yes	0,2,(2)	0,1,(1)	0,0,(0)	0,0,(0)	SRR545694(2;1),SRR545710(2;1),
chr17	62582307	-	canonical	TAGTA(A*)T	A	62582288	-19	expected	1	1	no	no	yes	0,1,(0)	0,1,(0)	0,0,(0)	0,0,(0)	SRR545707(1;1),
chr17	65103822	-	canonical	TCCTC(A*)T	A	65103801	-21	expected	9	7	yes	yes	yes	2,1,(6)	2,1,(4)	0,0,(6)	0,0,(4)	SRR534335(1;1),SRR317044(1;1),SRR317050(1;1),SRR317063(1;1),SRR545723(1;1),SRR545693(3;1),SRR317038(1;1),
chr17	66429743	-	canonical	TGCTC(A*)C	A	66429716	-27	expected	1	1	yes	no	yes	0,0,(1)	0,0,(1)	0,0,(1)	0,0,(1)	SRR534335(1;1),
chr17	66548110	-	canonical	AACTC(A*)C	A	66548092	-18	expected	1	1	yes	no	yes	0,0,(1)	0,0,(1)	0,0,(1)	0,0,(1)	SRR545693(1;1),
chr17	66899666	-	canonical	TACAT(A*)T	A	66899640	-26	expected	2	1	yes	no	yes	0,0,(2)	0,0,(1)	0,0,(2)	0,0,(1)	SRR545718(2;1),
chr17	67079506	-	canonical	TAGTT(A*)T	A	67079472	-34	expected	2	1	no	no	yes	0,0,(2)	0,0,(1)	0,0,(0)	0,0,(0)	SRR545708(2;1),
chr17	71397386	-	canonical	TGATC(A*)C	A	71397350	-36	expected	2	1	yes	no	yes	0,0,(2)	0,0,(1)	0,0,(2)	0,0,(1)	SRR545712(2;1),
chr17	73236211	-	canonical	GGCTC(A*)C	A	73236189	-22	expected	1	1	yes	no	yes	0,0,(1)	0,0,(1)	0,0,(1)	0,0,(1)	SRR317039(1;1),
chr17	73239680	-	canonical	CACTT(A*)C	A	73239651	-29	expected	4	3	yes	yes	yes	0,1,(3)	0,1,(2)	0,0,(3)	0,0,(2)	SRR545708(1;1),SRR317051(1;1),SRR307924(2;1),
chr17	73657814	-	canonical	TGCTT(A*)T	A	73657788	-26	expected	2	1	no	no	yes	0,2,(0)	0,1,(0)	0,0,(0)	0,0,(0)	SRR545718(2;1),
chr17	73826257	-	canonical	AGCTG(A*)C	A	73826232	-25	expected	3	3	yes	yes	yes	3,0,(0)	3,0,(0)	1,0,(0)	1,0,(0)	SRR317042(1;1),SRR317050(1;1),SRR317043(1;1),
chr17	73844765	-	canonical	TGTTT(A*)T	A	73844743	-22	expected	2	1	no	no	yes	2,0,(0)	1,0,(0)	0,0,(0)	0,0,(0)	SRR545694(2;1),
chr17	73926146	-	canonical	TCCTC(A*)C	A	73926128	-18	expected	2	1	yes	no	yes	0,0,(2)	0,0,(1)	0,0,(2)	0,0,(1)	SRR317044(2;1),
chr17	73947688	-	canonical	TACTT(A*)C	A	73947658	-30	expected	1	1	no	no	yes	0,0,(1)	0,0,(1)	0,0,(0)	0,0,(0)	SRR317054(1;1),
chr17	73974795	-	canonical	TTTTA(A*)T	A	73974774	-21	expected	1	1	yes	no	yes	0,1,(0)	0,1,(0)	0,1,(0)	0,1,(0)	SRR545694(1;1),
chr17	74388225	-	canonical	TGCCA(A*)C	A	74388194	-31	expected	6	5	yes	yes	yes	3,1,(2)	2,1,(2)	0,1,(2)	0,1,(2)	SRR534335(1;1),SRR317039(1;1),SRR307921(1;1),SRR317044(3;2),
chr17	74392928	-	canonical	TGCTT(A*)C	A	74392902	-26	expected	3	2	yes	yes	yes	0,0,(3)	0,0,(2)	0,0,(3)	0,0,(2)	SRR317066(1;1),SRR317062(2;1),
chr17	74395089	-	canonical	TGCTG(A*)C	A	74395072	-17	expected	4	2	no	yes	yes	3,1,(0)	1,1,(0)	0,0,(0)	0,0,(0)	SRR545712(3;1),SRR317043(1;1),
chr17	74473892	-	canonical	TCCTG(A*)T	A	74473867	-25	expected	1	1	yes	no	yes	0,0,(1)	0,0,(1)	0,0,(1)	0,0,(1)	SRR315321(1;1),
chr17	76490280	-	canonical	TCCTC(A*)C	A	76490255	-25	expected	1	1	no	no	yes	0,1,(0)	0,1,(0)	0,0,(0)	0,0,(0)	SRR317049(1;1),
chr17	76704365	-	canonical	TGCTG(A*)C	A	76704343	-22	expected	16	8	yes	yes	yes	14,2,(0)	7,1,(0)	0,2,(0)	0,1,(0)	SRR545690(5;2),SRR317054(1;1),SRR545689(1;1),SRR317042(1;1),SRR545718(4;1),SRR545720(2;1),SRR545694(2;1),
chr17	76795125	-	canonical	TGCTG(A*)C	A	76795105	-20	expected	2	2	no	yes	yes	2,0,(0)	2,0,(0)	0,0,(0)	0,0,(0)	SRR317063(1;1),SRR315310(1;1),
chr17	76802563	-	canonical	TTCTA(A*)C	A	76802368	-195	distal	1	1	yes	no	yes	0,1,(0)	0,1,(0)	0,1,(0)	0,1,(0)	SRR315305(1;1),
chr17	77770364	-	canonical	TGCAC(A*)C	A	77770339	-25	expected	1	1	yes	no	yes	1,0,(0)	1,0,(0)	1,0,(0)	1,0,(0)	SRR317062(1;1),
chr17	79511145	-	canonical	TGCAG(G*)T	G	79511118	-27	expected	3	1	no	no	yes	3,0,(0)	1,0,(0)	0,0,(0)	0,0,(0)	SRR545701(3;1),
chr17	79571779	-	canonical	TTTTC(A*)T	A	79571753	-26	expected	1	1	yes	no	yes	0,0,(1)	0,0,(1)	0,0,(1)	0,0,(1)	SRR545717(1;1),
chr17	79847228	-	canonical	TTCTG(A*)C	A	79847205	-23	expected	7	5	yes	yes	yes	0,0,(7)	0,0,(5)	0,0,(7)	0,0,(5)	SRR317043(1;1),SRR545720(1;1),SRR534332(1;1),SRR317062(2;1),SRR534333(2;1),
chr17	79863340	-	canonical	TCCTG(A*)C	A	79863323	-17	expected	1	1	no	no	yes	1,0,(0)	1,0,(0)	0,0,(0)	0,0,(0)	SRR317042(1;1),
chr17	79871779	-	canonical	TACTC(T*)C	T	79871756	-23	expected	4	1	yes	no	yes	0,0,(4)	0,0,(1)	0,0,(4)	0,0,(1)	SRR545719(4;1),
chr17	80016720	-	canonical	CACTC(A*)C	A	80016694	-26	expected	3	2	yes	yes	yes	0,0,(3)	0,0,(2)	0,0,(3)	0,0,(2)	SRR315310(1;1),SRR317049(2;1),
chr17	80043769	-	canonical	GGCTG(A*)T	A	80043747	-22	expected	1	1	no	no	yes	1,0,(0)	1,0,(0)	0,0,(0)	0,0,(0)	SRR534289(1;1),
chr17	80045379	-	canonical	TGCAG(G*)T	G	80045129	-250	distal	1	1	no	no	yes	1,0,(0)	1,0,(0)	0,0,(0)	0,0,(0)	SRR317048(1;1),
chr17	80047282	-	canonical	TGCTT(A*)T	A	80047260	-22	expected	82	65	yes	yes	yes	2,13,(67)	2,11,(52)	2,0,(56)	2,0,(43)	SRR315318(1;1),SRR307923(1;1),SRR317036(1;1),SRR307931(1;1),SRR534317(1;1),SRR317042(8;8),SRR545719(2;1),SRR545721(1;1),SRR317065(3;1),SRR317048(1;1),SRR317063(2;2),SRR307921(1;1),SRR307913(4;4),SRR315303(1;1),SRR317043(8;6),SRR317050(10;4),SRR545685(2;1),SRR317051(2;2),SRR315320(1;1),SRR317039(3;3),SRR545691(2;1),SRR317038(2;2),SRR545692(3;2),SRR545693(3;3),SRR317035(2;1),SRR317062(3;3),SRR30793…
chr17	80049580	-	canonical	TGCCC(A*)T	A	80049560	-20	expected	1	1	yes	no	yes	0,0,(1)	0,0,(1)	0,0,(1)	0,0,(1)	SRR545691(1;1),
chr17	80210502	-	canonical	TCTTC(A*)C	A	80210480	-22	expected	17	9	yes	yes	yes	0,1,(16)	0,1,(8)	0,0,(10)	0,0,(6)	SRR534317(2;2),SRR545719(4;1),SRR545714(2;1),SRR317050(1;1),SRR315306(1;1),SRR545713(5;1),SRR317051(1;1),SRR545717(1;1),
chr17	80576994	-	canonical	CGCTT(A*)T	A	80576970	-24	expected	2	1	yes	no	yes	0,0,(2)	0,0,(1)	0,0,(2)	0,0,(1)	SRR317049(2;1),
chr17	4701281	+	canonical	TGGTG(A*)C	A	4701303	-22	expected	3	2	yes	yes	yes	0,0,(3)	0,0,(2)	0,0,(3)	0,0,(2)	SRR317051(1;1),SRR317063(2;1),
chr17	5286396	+	canonical	TAGTT(A*)T	A	5286416	-20	expected	1	1	yes	no	yes	0,0,(1)	0,0,(1)	0,0,(1)	0,0,(1)	SRR545715(1;1),
chr17	6352605	+	canonical	TAGTC(A*)C	A	6352631	-26	expected	1	1	no	no	yes	1,0,(0)	1,0,(0)	0,0,(0)	0,0,(0)	SRR545694(1;1),
chr17	7215122	+	canonical	TACTA(A*)T	A	7215140	-18	expected	4	1	no	no	yes	0,0,(4)	0,0,(1)	0,0,(0)	0,0,(0)	SRR315318(4;1),
chr17	7404588	+	canonical	TGCTG(A*)T	A	7404607	-19	expected	1	1	no	no	yes	1,0,(0)	1,0,(0)	0,0,(0)	0,0,(0)	SRR545690(1;1),
chr17	7405199	+	canonical	TATAC(A*)C	A	7405218	-19	expected	1	1	no	no	yes	0,0,(1)	0,0,(1)	0,0,(0)	0,0,(0)	SRR317042(1;1),
chr17	7474667	+	canonical	TTCTC(A*)T	A	7474690	-23	expected	1	1	yes	no	yes	0,0,(1)	0,0,(1)	0,0,(1)	0,0,(1)	SRR317051(1;1),
chr17	7481630	+	canonical	TCCTG(A*)T	A	7481659	-29	expected	1	1	yes	no	yes	1,0,(0)	1,0,(0)	1,0,(0)	1,0,(0)	SRR317040(1;1),
chr17	7481639	+	canonical	TCCTC(A*)T	A	7481659	-20	expected	4	3	yes	yes	yes	2,0,(2)	1,0,(2)	0,0,(2)	0,0,(2)	SRR315305(1;1),SRR534289(3;2),
chr17	7801235	+	canonical	TGTTT(G*)T	G	7801288	-53	expected	1	1	yes	no	yes	0,0,(1)	0,0,(1)	0,0,(1)	0,0,(1)	SRR317051(1;1),
chr17	7807739	+	canonical	TGTTC(A*)T	A	7807759	-20	expected	4	1	yes	no	yes	0,0,(4)	0,0,(1)	0,0,(4)	0,0,(1)	SRR545691(4;1),
chr17	7852381	+	canonical	TCCTC(A*)T	A	7852399	-18	expected	3	2	yes	yes	yes	0,0,(3)	0,0,(2)	0,0,(3)	0,0,(2)	SRR545709(2;1),SRR315310(1;1),
chr17	8167055	+	canonical	TGCCC(A*)C	A	8167092	-37	expected	7	6	yes	yes	yes	0,5,(2)	0,4,(2)	0,3,(2)	0,2,(2)	SRR317040(2;2),SRR545705(1;1),SRR317036(3;2),SRR534318(1;1),
chr17	8168194	+	canonical	TGCTA(A*)C	A	8168212	-18	expected	3	3	yes	yes	yes	0,1,(2)	0,1,(2)	0,0,(2)	0,0,(2)	SRR317036(1;1),SRR317039(1;1),SRR317049(1;1),
chr17	16342619	+	canonical	GGCTC(A*)T	A	16342640	-21	expected	3	3	yes	yes	yes	1,0,(2)	1,0,(2)	0,0,(2)	0,0,(2)	SRR317043(1;1),SRR534317(1;1),SRR307914(1;1),
chr17	18110105	+	canonical	TGGTG(A*)C	A	18110128	-23	expected	1	1	no	no	yes	0,1,(0)	0,1,(0)	0,0,(0)	0,0,(0)	SRR317063(1;1),
chr17	18147198	+	canonical	TGCTG(A*)T	A	18147221	-23	expected	10	3	no	yes	yes	10,0,(0)	3,0,(0)	0,0,(0)	0,0,(0)	SRR534334(3;1),SRR317044(2;1),SRR317062(5;1),
chr17	19463697	+	canonical	TGTTC(A*)C	A	19463730	-33	expected	1	1	yes	no	yes	0,0,(1)	0,0,(1)	0,0,(1)	0,0,(1)	SRR317062(1;1),
chr17	20107621	+	canonical	TTTTC(A*)T	A	20107645	-24	expected	1	1	yes	no	yes	0,0,(1)	0,0,(1)	0,0,(1)	0,0,(1)	SRR545714(1;1),
chr17	20150507	+	canonical	TATAA(A*)T	A	20150531	-24	expected	1	1	no	no	yes	0,0,(1)	0,0,(1)	0,0,(0)	0,0,(0)	SRR545719(1;1),
chr17	21208339	+	canonical	TGTTC(A*)C	A	21208362	-23	expected	8	1	yes	no	yes	0,0,(8)	0,0,(1)	0,0,(8)	0,0,(1)	SRR534318(8;1),
chr17	25637056	+	canonical	GACTG(A*)T	A	25637086	-30	expected	1	1	no	no	yes	1,0,(0)	1,0,(0)	0,0,(0)	0,0,(0)	SRR545708(1;1),
chr17	26512172	+	canonical	GACTC(A*)C	A	26512204	-32	expected	4	2	no	yes	yes	0,0,(4)	0,0,(2)	0,0,(0)	0,0,(0)	SRR317043(1;1),SRR317044(3;1),
chr17	26686318	+	canonical	TTCTC(A*)T	A	26686337	-19	expected	1	1	yes	no	yes	0,0,(1)	0,0,(1)	0,0,(1)	0,0,(1)	SRR545720(1;1),
chr17	26711838	+	canonical	TCCTG(A*)C	A	26711857	-19	expected	1	1	yes	no	yes	0,1,(0)	0,1,(0)	0,1,(0)	0,1,(0)	SRR317051(1;1),
chr17	27001963	+	canonical	TCCTG(A*)T	A	27001987	-24	expected	4	2	no	no	yes	4,0,(0)	2,0,(0)	0,0,(0)	0,0,(0)	SRR545708(4;2),
chr17	27013648	+	canonical	TATTC(A*)T	A	27013671	-23	expected	5	2	yes	yes	yes	0,0,(5)	0,0,(2)	0,0,(5)	0,0,(2)	SRR317044(4;1),SRR317043(1;1),
chr17	27075919	+	canonical	TACTG(A*)T	A	27075962	-43	expected	1	1	no	no	yes	0,1,(0)	0,1,(0)	0,0,(0)	0,0,(0)	SRR315310(1;1),
chr17	28935426	+	canonical	TACTT(A*)T	A	28935447	-21	expected	3	2	no	yes	yes	0,1,(2)	0,1,(1)	0,0,(0)	0,0,(0)	SRR534318(1;1),SRR317050(2;1),
chr17	29324224	+	canonical	TTCTG(A*)T	A	29324259	-35	expected	1	1	no	no	yes	1,0,(0)	1,0,(0)	0,0,(0)	0,0,(0)	SRR534335(1;1),
chr17	29553425	+	canonical	TGCAA(A*)T	A	29553452	-27	expected	1	1	yes	no	yes	1,0,(0)	1,0,(0)	1,0,(0)	1,0,(0)	SRR545692(1;1),
chr17	29661837	+	canonical	TGCTA(A*)T	A	29661855	-18	expected	1	1	no	no	yes	1,0,(0)	1,0,(0)	0,0,(0)	0,0,(0)	SRR545709(1;1),
chr17	29667498	+	canonical	TACTA(G*)C	G	29667522	-24	expected	2	2	yes	yes	yes	0,1,(1)	0,1,(1)	0,1,(1)	0,1,(1)	SRR534335(1;1),SRR534289(1;1),
chr17	30694770	+	canonical	CGTTG(A*)T	A	30694790	-20	expected	3	3	yes	yes	yes	0,0,(3)	0,0,(3)	0,0,(3)	0,0,(3)	SRR534326(1;1),SRR545686(1;1),SRR545714(1;1),
chr17	33932691	+	canonical	TGCTT(A*)C	A	33932723	-32	expected	1	1	no	no	yes	0,1,(0)	0,1,(0)	0,0,(0)	0,0,(0)	SRR315310(1;1),
chr17	36523736	+	canonical	TGATA(A*)C	A	36523764	-28	expected	1	1	no	no	yes	1,0,(0)	1,0,(0)	0,0,(0)	0,0,(0)	SRR315306(1;1),
chr17	36868928	+	canonical	TAGTC(A*)C	A	36868943	-15	expected	5	1	yes	no	yes	5,0,(0)	1,0,(0)	5,0,(0)	1,0,(0)	SRR534327(5;1),
chr17	36875746	+	canonical	CGCTG(A*)T	A	36875769	-23	expected	4	4	no	yes	yes	4,0,(0)	4,0,(0)	0,0,(0)	0,0,(0)	SRR307914(1;1),SRR317056(1;1),SRR315310(1;1),SRR315317(1;1),
chr17	37358546	+	canonical	GACTG(A*)C	A	37358569	-23	expected	49	30	yes	yes	yes	47,0,(2)	28,0,(2)	0,0,(2)	0,0,(2)	SRR545707(4;2),SRR317062(1;1),SRR317059(1;1),SRR545701(1;1),SRR317048(2;2),SRR545723(5;3),SRR315307(6;1),SRR317064(1;1),SRR534318(1;1),SRR317036(1;1),SRR307931(1;1),SRR317054(1;1),SRR317058(1;1),SRR545691(1;1),SRR317038(1;1),SRR534325(2;1),SRR307914(1;1),SRR545711(6;1),SRR317051(1;1),SRR317040(1;1),SRR545717(1;1),SRR317063(3;1),SRR307922(1;1),SRR315306(1;1),SRR545694(4;2),
chr17	38146320	+	canonical	TGTTG(A*)C	A	38146346	-26	expected	3	1	no	no	yes	3,0,(0)	1,0,(0)	0,0,(0)	0,0,(0)	SRR317063(3;1),
chr17	38151652	+	canonical	TGCCC(A*)C	A	38151676	-24	expected	3	1	no	no	yes	0,3,(0)	0,1,(0)	0,0,(0)	0,0,(0)	SRR317062(3;1),
chr17	38153558	+	canonical	CGCTC(A*)T	A	38153582	-24	expected	42	19	yes	yes	yes	0,0,(42)	0,0,(19)	0,0,(38)	0,0,(15)	SRR315318(1;1),SRR307914(5;2),SRR545712(11;2),SRR317064(3;2),SRR317049(4;2),SRR545704(1;1),SRR317062(11;4),SRR317063(4;4),SRR545720(2;1),
chr17	38412620	+	canonical	TCTTA(A*)T	A	38412642	-22	expected	1	1	yes	no	yes	0,1,(0)	0,1,(0)	0,1,(0)	0,1,(0)	SRR534326(1;1),
chr17	38612676	+	canonical	AACTG(A*)C	A	38612700	-24	expected	2	1	yes	no	yes	0,2,(0)	0,1,(0)	0,2,(0)	0,1,(0)	SRR317062(2;1),
chr17	40461043	+	canonical	TTCTC(A*)C	A	40461064	-21	expected	1	1	yes	no	yes	0,0,(1)	0,0,(1)	0,0,(1)	0,0,(1)	SRR317049(1;1),
chr17	40647027	+	canonical	TTCTC(A*)T	A	40647051	-24	expected	3	3	yes	yes	yes	0,0,(3)	0,0,(3)	0,0,(3)	0,0,(3)	SRR545687(1;1),SRR534325(1;1),SRR315310(1;1),
chr17	40839714	+	canonical	TGTTG(A*)T	A	40839737	-23	expected	2	2	yes	yes	yes	0,1,(1)	0,1,(1)	0,1,(1)	0,1,(1)	SRR534289(1;1),SRR545687(1;1),
chr17	41141338	+	canonical	TGCTC(A*)T	A	41141357	-19	expected	1	1	no	no	yes	0,1,(0)	0,1,(0)	0,0,(0)	0,0,(0)	SRR534289(1;1),
chr17	41599391	+	canonical	GGCTC(A*)T	A	41599414	-23	expected	2	1	yes	no	yes	0,0,(2)	0,0,(1)	0,0,(2)	0,0,(1)	SRR317056(2;1),
chr17	42232199	+	canonical	GACTG(A*)T	A	42232220	-21	expected	1	1	yes	no	yes	0,0,(1)	0,0,(1)	0,0,(1)	0,0,(1)	SRR317063(1;1),
chr17	42267831	+	canonical	TCCTC(A*)C	A	42267868	-37	expected	1	1	no	no	yes	0,0,(1)	0,0,(1)	0,0,(0)	0,0,(0)	SRR545713(1;1),
chr17	42825688	+	canonical	AGCTC(A*)C	A	42825708	-20	expected	2	2	no	yes	yes	0,0,(2)	0,0,(2)	0,0,(0)	0,0,(0)	SRR317044(1;1),SRR545694(1;1),
chr17	43163835	+	canonical	TACTA(A*)C	A	43163875	-40	expected	1	1	yes	no	yes	0,1,(0)	0,1,(0)	0,1,(0)	0,1,(0)	SRR315306(1;1),
chr17	45299011	+	canonical	TGCTC(A*)C	A	45299047	-36	expected	2	1	yes	no	yes	0,0,(2)	0,0,(1)	0,0,(2)	0,0,(1)	SRR317042(2;1),
chr17	45735850	+	canonical	TATTC(A*)T	A	45735873	-23	expected	2	2	no	yes	yes	0,0,(2)	0,0,(2)	0,0,(0)	0,0,(0)	SRR317050(1;1),SRR315310(1;1),
chr17	45747025	+	canonical	TGCTA(A*)T	A	45747043	-18	expected	3	2	yes	yes	yes	0,2,(1)	0,1,(1)	0,2,(1)	0,1,(1)	SRR545717(2;1),SRR545713(1;1),
chr17	45775935	+	canonical	TGCAG(A*)C	A	45775960	-25	expected	1	1	yes	no	yes	0,0,(1)	0,0,(1)	0,0,(1)	0,0,(1)	SRR534289(1;1),
chr17	46048697	+	canonical	CGCTC(A*)C	A	46048727	-30	expected	1	1	yes	no	yes	0,0,(1)	0,0,(1)	0,0,(1)	0,0,(1)	SRR317039(1;1),
chr17	46940178	+	canonical	TACTG(A*)C	A	46940199	-21	expected	2	1	no	no	yes	2,0,(0)	1,0,(0)	0,0,(0)	0,0,(0)	SRR317049(2;1),
chr17	47120762	+	canonical	TGCTG(A*)C	A	47120789	-27	expected	2	1	no	no	yes	0,2,(0)	0,1,(0)	0,0,(0)	0,0,(0)	SRR317063(2;1),
chr17	47869224	+	canonical	TGCTA(A*)T	A	47869247	-23	expected	2	2	yes	yes	yes	0,0,(2)	0,0,(2)	0,0,(2)	0,0,(2)	SRR534312(1;1),SRR317043(1;1),
chr17	47875652	+	canonical	CACTC(A*)T	A	47875680	-28	expected	15	7	yes	yes	yes	1,3,(11)	1,1,(5)	0,0,(11)	0,0,(5)	SRR315306(1;1),SRR545707(1;1),SRR545719(6;1),SRR545702(3;2),SRR534325(1;1),SRR534327(3;1),
chr17	48149315	+	canonical	GGCTG(A*)C	A	48149349	-34	expected	1	1	no	no	yes	1,0,(0)	1,0,(0)	0,0,(0)	0,0,(0)	SRR317063(1;1),
chr17	48151783	+	canonical	CACTG(A*)T	A	48151811	-28	expected	1	1	yes	no	yes	0,0,(1)	0,0,(1)	0,0,(1)	0,0,(1)	SRR317064(1;1),
chr17	48559431	+	canonical	TGCTT(A*)C	A	48559451	-20	expected	2	2	no	yes	yes	1,0,(1)	1,0,(1)	0,0,(0)	0,0,(0)	SRR317050(1;1),SRR317042(1;1),
chr17	48562080	+	canonical	TAGTC(A*)C	A	48562104	-24	expected	4	3	no	yes	yes	3,0,(1)	2,0,(1)	0,0,(0)	0,0,(0)	SRR315311(1;1),SRR317063(1;1),SRR317062(2;1),
chr17	48735766	+	canonical	TCCTG(A*)T	A	48735795	-29	expected	1	1	no	no	yes	1,0,(0)	1,0,(0)	0,0,(0)	0,0,(0)	SRR317063(1;1),
chr17	49239063	+	canonical	TGGTC(A*)T	A	49239088	-25	expected	3	1	yes	no	yes	0,0,(3)	0,0,(1)	0,0,(3)	0,0,(1)	SRR545719(3;1),
chr17	55083511	+	canonical	CACTA(A*)C	A	55083533	-22	expected	2	1	yes	no	yes	0,0,(2)	0,0,(1)	0,0,(2)	0,0,(1)	SRR545703(2;1),
chr17	56166472	+	canonical	TAATT(A*)C	A	56166502	-30	expected	3	2	yes	yes	yes	0,0,(3)	0,0,(2)	0,0,(3)	0,0,(2)	SRR317045(1;1),SRR317062(2;1),
chr17	57771029	+	canonical	TGCTA(A*)C	A	57771088	-59	expected	3	2	yes	yes	yes	2,0,(1)	1,0,(1)	2,0,(1)	1,0,(1)	SRR534317(1;1),SRR545703(2;1),
chr17	58012526	+	canonical	TGCTA(A*)T	A	58012553	-27	expected	3	2	no	yes	yes	2,1,(0)	1,1,(0)	0,0,(0)	0,0,(0)	SRR317042(2;1),SRR317062(1;1),
chr17	60674581	+	canonical	TATAG(A*)T	A	60678011	-3430	distal	8	1	no	no	yes	0,8,(0)	0,1,(0)	0,0,(0)	0,0,(0)	SRR545715(8;1),
chr17	60767869	+	canonical	TGCAC(A*)C	A	60768002	-133	distal	1	1	yes	no	yes	0,0,(1)	0,0,(1)	0,0,(1)	0,0,(1)	SRR317063(1;1),
chr17	61476163	+	canonical	AGCTG(A*)C	A	61476181	-18	expected	3	1	no	no	yes	3,0,(0)	1,0,(0)	0,0,(0)	0,0,(0)	SRR545717(3;1),
chr17	61561668	+	canonical	TGCCC(A*)T	A	61561690	-22	expected	1	1	yes	no	yes	0,0,(1)	0,0,(1)	0,0,(1)	0,0,(1)	SRR545709(1;1),
chr17	61662542	+	canonical	TGATG(A*)T	A	61662572	-30	expected	1	1	no	no	yes	1,0,(0)	1,0,(0)	0,0,(0)	0,0,(0)	SRR545704(1;1),
chr17	61886157	+	canonical	TGTTA(A*)T	A	61886179	-22	expected	6	2	yes	yes	yes	0,4,(2)	0,1,(1)	0,4,(2)	0,1,(1)	SRR317056(2;1),SRR545716(4;1),
chr17	66246300	+	canonical	TTTTT(A*)T	A	66246328	-28	expected	6	4	yes	yes	yes	0,0,(6)	0,0,(4)	0,0,(6)	0,0,(4)	SRR545723(1;1),SRR545713(3;1),SRR534334(2;2),
chr17	66246912	+	canonical	TGTTT(T*)T	T	66246934	-22	expected	1	1	no	no	yes	0,0,(1)	0,0,(1)	0,0,(0)	0,0,(0)	SRR534327(1;1),
chr17	72784854	+	canonical	TTCTT(A*)C	A	72784927	-73	distal	6	4	yes	yes	yes	0,0,(6)	0,0,(4)	0,0,(6)	0,0,(4)	SRR317042(1;1),SRR315306(1;1),SRR545685(1;1),SRR545705(3;1),
chr17	73486754	+	canonical	TCCTC(A*)C	A	73486782	-28	expected	2	1	yes	no	yes	0,0,(2)	0,0,(1)	0,0,(2)	0,0,(1)	SRR545718(2;1),
chr17	73487111	+	canonical	TGCAG(A*)C	A	73487129	-18	expected	1	1	no	no	yes	1,0,(0)	1,0,(0)	0,0,(0)	0,0,(0)	SRR317048(1;1),
chr17	73559077	+	canonical	GGCTC(A*)C	A	73559096	-19	expected	1	1	yes	no	yes	0,0,(1)	0,0,(1)	0,0,(1)	0,0,(1)	SRR317056(1;1),
chr17	73607938	+	canonical	TGCTC(C*)T	C	73607966	-28	expected	2	1	no	no	yes	0,0,(2)	0,0,(1)	0,0,(0)	0,0,(0)	SRR317062(2;1),
chr17	73820319	+	canonical	TGGTG(A*)C	A	73820342	-23	expected	11	2	yes	yes	yes	0,0,(11)	0,0,(2)	0,0,(11)	0,0,(2)	SRR545711(10;1),SRR315311(1;1),
chr17	75209971	+	canonical	TCCTC(A*)C	A	75209999	-28	expected	2	1	no	no	yes	0,0,(2)	0,0,(1)	0,0,(0)	0,0,(0)	SRR317058(2;1),
chr17	75484786	+	canonical	TGCTG(A*)C	A	75484808	-22	expected	1	1	yes	no	yes	1,0,(0)	1,0,(0)	1,0,(0)	1,0,(0)	SRR317050(1;1),
chr17	76067133	+	canonical	AGCTC(A*)T	A	76067165	-32	expected	2	1	no	no	yes	2,0,(0)	1,0,(0)	0,0,(0)	0,0,(0)	SRR545694(2;1),
chr17	76099467	+	canonical	AGCTC(A*)T	A	76099494	-27	expected	2	1	yes	no	yes	0,0,(2)	0,0,(1)	0,0,(2)	0,0,(1)	SRR545707(2;1),
chr17	76416272	+	canonical	CGCTG(A*)C	A	76420141	-3869	distal	1	1	yes	no	yes	0,0,(1)	0,0,(1)	0,0,(1)	0,0,(1)	SRR545704(1;1),
chr17	76420110	+	canonical	CACTC(A*)T	A	76420141	-31	expected	4	2	yes	yes	yes	0,0,(4)	0,0,(2)	0,0,(4)	0,0,(2)	SRR545690(3;1),SRR317042(1;1),
chr17	77076975	+	canonical	GGCTC(A*)C	A	77077006	-31	expected	1	1	yes	no	yes	0,0,(1)	0,0,(1)	0,0,(1)	0,0,(1)	SRR317039(1;1),
chr17	77079071	+	canonical	TCCTG(A*)T	A	77079101	-30	expected	10	6	yes	yes	yes	5,2,(3)	2,2,(2)	0,2,(3)	0,2,(2)	SRR545694(4;1),SRR317039(1;1),SRR545691(1;1),SRR534334(2;1),SRR317040(1;1),SRR307924(1;1),
chr17	78327285	+	canonical	TGGTA(A*)C	A	78327311	-26	expected	1	1	yes	no	yes	0,1,(0)	0,1,(0)	0,1,(0)	0,1,(0)	SRR317044(1;1),
chr17	78333839	+	canonical	TTCTT(A*)T	A	78333860	-21	expected	13	4	yes	yes	yes	0,1,(12)	0,1,(3)	0,0,(12)	0,0,(3)	SRR545719(1;1),SRR545713(6;1),SRR307921(3;1),SRR545716(3;1),
chr17	78349537	+	canonical	TTCTT(A*)C	A	78349559	-22	expected	2	2	yes	yes	yes	0,1,(1)	0,1,(1)	0,0,(1)	0,0,(1)	SRR545714(1;1),SRR317054(1;1),
chr17	78357428	+	canonical	TGTTT(G*)T	G	78357476	-48	expected	3	1	no	no	yes	0,3,(0)	0,1,(0)	0,0,(0)	0,0,(0)	SRR534327(3;1),
chr17	80196561	+	canonical	GACTG(A*)C	A	80196577	-16	expected	3	2	yes	no	yes	3,0,(0)	2,0,(0)	1,0,(0)	1,0,(0)	SRR545717(3;2),
chr17	80882794	+	canonical	TCTTC(A*)C	A	80882814	-20	expected	1	1	yes	no	yes	0,0,(1)	0,0,(1)	0,0,(1)	0,0,(1)	SRR545701(1;1),
chr18	2923889	-	canonical	TCCTG(A*)T	A	2923859	-30	expected	1	1	yes	no	yes	0,0,(1)	0,0,(1)	0,0,(1)	0,0,(1)	SRR317067(1;1),
chr18	6964827	-	canonical	TTCTT(A*)T	A	6964802	-25	expected	1	1	yes	no	yes	0,0,(1)	0,0,(1)	0,0,(1)	0,0,(1)	SRR545716(1;1),
chr18	6992747	-	canonical	GGCTT(A*)T	A	6992719	-28	expected	1	1	yes	no	yes	0,0,(1)	0,0,(1)	0,0,(1)	0,0,(1)	SRR315317(1;1),
chr18	9557399	-	canonical	TACTA(A*)T	A	9557380	-19	expected	1	1	yes	no	yes	0,0,(1)	0,0,(1)	0,0,(1)	0,0,(1)	SRR317054(1;1),
chr18	9588266	-	canonical	TGCAT(A*)T	A	9588233	-33	expected	3	2	yes	yes	yes	0,0,(3)	0,0,(2)	0,0,(3)	0,0,(2)	SRR545694(1;1),SRR545720(2;1),
chr18	10680393	-	canonical	TATTT(A*)T	A	10680368	-25	expected	1	1	yes	no	yes	0,0,(1)	0,0,(1)	0,0,(1)	0,0,(1)	SRR545687(1;1),
chr18	10762645	-	canonical	TTTTT(A*)C	A	10762623	-22	expected	1	1	no	no	yes	0,1,(0)	0,1,(0)	0,0,(0)	0,0,(0)	SRR307921(1;1),
chr18	12535634	-	canonical	TAGTA(A*)C	A	12535600	-34	expected	2	1	no	no	yes	0,2,(0)	0,1,(0)	0,0,(0)	0,0,(0)	SRR545719(2;1),
chr18	19148084	-	canonical	AGTTG(A*)T	A	19148055	-29	expected	1	1	no	no	yes	1,0,(0)	1,0,(0)	0,0,(0)	0,0,(0)	SRR545713(1;1),
chr18	43488077	-	canonical	TTTTT(A*)T	A	43488046	-31	expected	5	2	yes	yes	yes	0,0,(5)	0,0,(2)	0,0,(5)	0,0,(2)	SRR545720(4;1),SRR317039(1;1),
chr18	43524110	-	canonical	TGCTG(A*)C	A	43524085	-25	expected	2	1	no	no	yes	2,0,(0)	1,0,(0)	0,0,(0)	0,0,(0)	SRR545718(2;1),
chr18	44392601	-	canonical	TCCTC(A*)T	A	44392575	-26	expected	4	1	no	no	yes	4,0,(0)	1,0,(0)	0,0,(0)	0,0,(0)	SRR545719(4;1),
chr18	44682628	-	canonical	TAGTA(A*)C	A	44682603	-25	expected	2	2	no	yes	yes	0,2,(0)	0,2,(0)	0,0,(0)	0,0,(0)	SRR545694(1;1),SRR534326(1;1),
chr18	47016942	-	canonical	GACTC(A*)T	A	47016922	-20	expected	1	1	yes	no	yes	0,0,(1)	0,0,(1)	0,0,(1)	0,0,(1)	SRR545714(1;1),
chr18	47017980	-	canonical	TATTG(A*)C	A	47017954	-26	expected	1	1	yes	no	yes	0,0,(1)	0,0,(1)	0,0,(1)	0,0,(1)	SRR534326(1;1),
chr18	47380038	-	canonical	TGCTC(A*)C	A	47380017	-21	expected	1	1	yes	no	yes	0,0,(1)	0,0,(1)	0,0,(1)	0,0,(1)	SRR317055(1;1),
chr18	55270196	-	canonical	TGTTA(A*)T	A	55270175	-21	expected	3	1	yes	no	yes	0,0,(3)	0,0,(1)	0,0,(3)	0,0,(1)	SRR534317(3;1),
chr18	55273226	-	canonical	TACAC(A*)T	A	55273202	-24	expected	2	1	yes	no	yes	0,0,(2)	0,0,(1)	0,0,(2)	0,0,(1)	SRR545692(2;1),
chr18	66351499	-	canonical	TATTC(A*)T	A	66351480	-19	expected	1	1	yes	no	yes	0,0,(1)	0,0,(1)	0,0,(1)	0,0,(1)	SRR317050(1;1),
chr18	67741250	-	canonical	TGTTA(A*)C	A	67741230	-20	expected	2	1	no	no	yes	2,0,(0)	1,0,(0)	0,0,(0)	0,0,(0)	SRR317051(2;1),
chr18	197592	+	canonical	TACTT(A*)C	A	197615	-23	expected	4	4	yes	yes	yes	0,0,(4)	0,0,(4)	0,0,(3)	0,0,(3)	SRR317062(1;1),SRR307930(1;1),SRR317045(1;1),SRR317055(1;1),
chr18	2656296	+	canonical	TGTAG(A*)C	A	2666155	-9859	distal	1	1	yes	no	yes	0,0,(1)	0,0,(1)	0,0,(1)	0,0,(1)	SRR317043(1;1),
chr18	2784419	+	canonical	TGCTC(A*)C	A	2784447	-28	expected	1	1	yes	no	yes	0,0,(1)	0,0,(1)	0,0,(1)	0,0,(1)	SRR545687(1;1),
chr18	3253197	+	canonical	TGTTG(A*)T	A	3253230	-33	expected	1	1	yes	no	yes	0,0,(1)	0,0,(1)	0,0,(1)	0,0,(1)	SRR545688(1;1),
chr18	10471494	+	canonical	GGCTT(A*)C	A	10471526	-32	expected	1	1	no	no	yes	0,1,(0)	0,1,(0)	0,0,(0)	0,0,(0)	SRR534326(1;1),
chr18	13042174	+	canonical	TACTT(A*)T	A	13042202	-28	expected	1	1	yes	no	yes	0,0,(1)	0,0,(1)	0,0,(1)	0,0,(1)	SRR307930(1;1),
chr18	13059055	+	canonical	TAATA(A*)C	A	13059080	-25	expected	2	1	no	no	yes	0,0,(2)	0,0,(1)	0,0,(0)	0,0,(0)	SRR545713(2;1),
chr18	21044457	+	canonical	TATAT(A*)C	A	21044482	-25	expected	2	2	yes	yes	yes	2,0,(0)	2,0,(0)	2,0,(0)	2,0,(0)	SRR315309(1;1),SRR315318(1;1),
chr18	21053368	+	canonical	TACTG(A*)C	A	21053392	-24	expected	4	3	yes	yes	yes	1,0,(3)	1,0,(2)	0,0,(3)	0,0,(2)	SRR534317(3;2),SRR545708(1;1),
chr18	21059258	+	canonical	TACTG(A*)C	A	21059280	-22	expected	2	1	no	no	yes	2,0,(0)	1,0,(0)	0,0,(0)	0,0,(0)	SRR317067(2;1),
chr18	21511000	+	canonical	AGTTG(A*)T	A	21511025	-25	expected	1	1	no	no	yes	1,0,(0)	1,0,(0)	0,0,(0)	0,0,(0)	SRR317047(1;1),
chr18	33718734	+	canonical	TGTTC(A*)T	A	33718757	-23	expected	1	1	yes	no	yes	0,0,(1)	0,0,(1)	0,0,(1)	0,0,(1)	SRR317043(1;1),
chr18	33740866	+	canonical	TGCTA(A*)T	A	33740894	-28	expected	1	1	no	no	yes	0,1,(0)	0,1,(0)	0,0,(0)	0,0,(0)	SRR307913(1;1),
chr18	33785008	+	canonical	AGCTC(A*)T	A	33785039	-31	expected	1	1	no	no	yes	1,0,(0)	1,0,(0)	0,0,(0)	0,0,(0)	SRR545713(1;1),
chr18	33793304	+	canonical	GGCTC(A*)T	A	33793328	-24	expected	6	2	yes	no	yes	0,0,(6)	0,0,(2)	0,0,(6)	0,0,(2)	SRR307914(6;2),
chr18	48581116	+	canonical	AGCTT(A*)T	A	48581150	-34	expected	4	1	yes	no	yes	0,0,(4)	0,0,(1)	0,0,(4)	0,0,(1)	SRR545705(4;1),
chr18	56367755	+	canonical	TAATA(A*)C	A	56376609	-8854	distal	1	1	yes	no	yes	0,0,(1)	0,0,(1)	0,0,(1)	0,0,(1)	SRR317055(1;1),
chr18	57568279	+	canonical	TGGTA(A*)C	A	57569878	-1599	distal	1	1	no	no	yes	0,1,(0)	0,1,(0)	0,0,(0)	0,0,(0)	SRR545690(1;1),
chr18	72185696	+	canonical	AGCTT(A*)T	A	72185733	-37	expected	1	1	yes	no	yes	0,0,(1)	0,0,(1)	0,0,(1)	0,0,(1)	SRR317064(1;1),
chr18	72186155	+	canonical	AGCTC(A*)C	A	72186183	-28	expected	2	2	yes	yes	yes	0,0,(2)	0,0,(2)	0,0,(2)	0,0,(2)	SRR317062(1;1),SRR307922(1;1),
chr18	77097253	+	canonical	TGCAC(A*)C	A	77097278	-25	expected	1	1	yes	no	yes	1,0,(0)	1,0,(0)	1,0,(0)	1,0,(0)	SRR317044(1;1),
chr18	77477783	+	canonical	CGCTC(A*)T	A	77477809	-26	expected	10	2	yes	yes	yes	0,4,(6)	0,1,(1)	0,4,(6)	0,1,(1)	SRR534289(6;1),SRR545718(4;1),
chr18	77893472	+	canonical	TGCTT(A*)A	A	77893494	-22	expected	1	1	yes	no	yes	0,0,(1)	0,0,(1)	0,0,(1)	0,0,(1)	SRR315311(1;1),
chr19	618781	-	canonical	GACTC(A*)C	A	618760	-21	expected	2	1	no	no	yes	0,2,(0)	0,1,(0)	0,0,(0)	0,0,(0)	SRR534326(2;1),
chr19	873604	-	canonical	AGCTG(A*)C	A	873582	-22	expected	4	2	yes	yes	yes	1,0,(3)	1,0,(1)	0,0,(3)	0,0,(1)	SRR545719(1;1),SRR317062(3;1),
chr19	890263	-	canonical	TGCTG(A*)C	A	890244	-19	expected	2	2	yes	yes	yes	1,0,(1)	1,0,(1)	0,0,(1)	0,0,(1)	SRR315310(1;1),SRR545694(1;1),
chr19	1013364	-	canonical	TGCTG(A*)C	A	1013339	-25	expected	1	1	no	no	yes	1,0,(0)	1,0,(0)	0,0,(0)	0,0,(0)	SRR317051(1;1),
chr19	1109229	-	canonical	GGCTC(A*)T	A	1109210	-19	expected	8	5	yes	yes	yes	0,0,(8)	0,0,(5)	0,0,(8)	0,0,(5)	SRR317049(2;2),SRR545701(1;1),SRR545718(1;1),SRR545685(4;1),
chr19	1109796	-	canonical	CACTT(A*)C	A	1109776	-20	expected	4	2	yes	no	yes	0,0,(4)	0,0,(2)	0,0,(4)	0,0,(2)	SRR545720(4;2),
chr19	1116946	-	canonical	GGCTC(A*)C	A	1116925	-21	expected	23	10	yes	yes	yes	0,0,(23)	0,0,(10)	0,0,(4)	0,0,(2)	SRR534334(2;1),SRR534335(2;1),SRR534318(7;2),SRR307921(1;1),SRR545694(8;3),SRR534327(3;2),
chr19	1119185	-	canonical	TGCTC(A*)C	A	1119163	-22	expected	1	1	no	no	yes	0,1,(0)	0,1,(0)	0,0,(0)	0,0,(0)	SRR545717(1;1),
chr19	1584691	-	canonical	TGCAT(A*)T	A	1584676	-15	expected	2	1	no	no	yes	2,0,(0)	1,0,(0)	0,0,(0)	0,0,(0)	SRR545720(2;1),
chr19	1598240	-	canonical	TACTC(A*)C	A	1598214	-26	expected	2	1	yes	no	yes	0,0,(2)	0,0,(1)	0,0,(2)	0,0,(1)	SRR317049(2;1),
chr19	1611392	-	canonical	GGCTG(A*)C	A	1611368	-24	expected	3	2	yes	yes	yes	0,0,(3)	0,0,(2)	0,0,(3)	0,0,(2)	SRR315308(2;1),SRR545701(1;1),
chr19	1624018	-	canonical	TTCTC(A*)C	A	1623999	-19	expected	4	1	yes	no	yes	0,4,(0)	0,1,(0)	0,4,(0)	0,1,(0)	SRR534327(4;1),
chr19	2050977	-	canonical	CGCTC(A*)C	A	2050946	-31	expected	2	2	no	yes	yes	0,1,(1)	0,1,(1)	0,0,(0)	0,0,(0)	SRR545692(1;1),SRR317052(1;1),
chr19	2073444	-	canonical	AGCTG(A*)T	A	2073423	-21	expected	1	1	no	no	yes	0,1,(0)	0,1,(0)	0,0,(0)	0,0,(0)	SRR545717(1;1),
chr19	2110914	-	canonical	TGCTA(A*)C	A	2110895	-19	expected	1	1	yes	no	yes	1,0,(0)	1,0,(0)	1,0,(0)	1,0,(0)	SRR545692(1;1),
chr19	2113433	-	canonical	TGCTG(A*)C	A	2113412	-21	expected	8	5	yes	yes	yes	7,0,(1)	4,0,(1)	0,0,(1)	0,0,(1)	SRR545719(1;1),SRR545707(2;2),SRR317049(1;1),SRR545713(4;1),
chr19	2114328	-	canonical	TGCTG(A*)T	A	2114301	-27	expected	1	1	no	no	yes	1,0,(0)	1,0,(0)	0,0,(0)	0,0,(0)	SRR545707(1;1),
chr19	2116297	-	canonical	GGCTC(A*)T	A	2116277	-20	expected	6	2	yes	yes	yes	0,0,(6)	0,0,(2)	0,0,(6)	0,0,(2)	SRR315322(1;1),SRR545719(5;1),
chr19	2123896	-	canonical	TGCTG(A*)C	A	2123878	-18	expected	4	1	no	no	yes	4,0,(0)	1,0,(0)	0,0,(0)	0,0,(0)	SRR545693(4;1),
chr19	2129477	-	canonical	TGCTG(A*)T	A	2129456	-21	expected	3	1	no	no	yes	3,0,(0)	1,0,(0)	0,0,(0)	0,0,(0)	SRR534334(3;1),
chr19	3538783	-	canonical	CACTC(A*)C	A	3538754	-29	expected	2	1	no	no	yes	0,0,(2)	0,0,(1)	0,0,(0)	0,0,(0)	SRR317049(2;1),
chr19	3546189	-	canonical	CGCTG(A*)C	A	3546166	-23	expected	1	1	no	no	yes	1,0,(0)	1,0,(0)	0,0,(0)	0,0,(0)	SRR317049(1;1),
chr19	3547578	-	canonical	TCCTG(A*)C	A	3547545	-33	expected	1	1	no	no	yes	1,0,(0)	1,0,(0)	0,0,(0)	0,0,(0)	SRR317049(1;1),
chr19	3643396	-	canonical	TGCCC(A*)C	A	3643379	-17	expected	6	4	yes	yes	yes	0,6,(0)	0,4,(0)	0,1,(0)	0,1,(0)	SRR534289(1;1),SRR534317(1;1),SRR545719(1;1),SRR545691(3;1),
chr19	3647417	-	canonical	GGCTG(A*)T	A	3647384	-33	expected	2	1	no	no	yes	2,0,(0)	1,0,(0)	0,0,(0)	0,0,(0)	SRR317049(2;1),
chr19	3979450	-	canonical	TGCTG(A*)C	A	3979434	-16	expected	80	51	yes	yes	yes	68,7,(5)	41,6,(4)	1,0,(3)	1,0,(3)	SRR545703(3;1),SRR534289(1;1),SRR317042(7;7),SRR317039(1;1),SRR315320(1;1),SRR315305(2;1),SRR307931(1;1),SRR315310(3;3),SRR545721(3;1),SRR545719(1;1),SRR307930(1;1),SRR534335(1;1),SRR317049(6;5),SRR315309(1;1),SRR317067(2;1),SRR307921(1;1),SRR317063(1;1),SRR315312(1;1),SRR317050(3;2),SRR317043(8;6),SRR315311(1;1),SRR545713(3;1),SRR315306(3;3),SRR534334(7;1),SRR317055(1;1),SRR545716(3;1),SRR545720…
chr19	4362750	-	canonical	CACTC(A*)C	A	4362733	-17	expected	11	7	yes	yes	yes	0,1,(10)	0,1,(6)	0,0,(10)	0,0,(6)	SRR317043(1;1),SRR545694(3;1),SRR545704(1;1),SRR545708(4;2),SRR534334(1;1),SRR534289(1;1),
chr19	4453559	-	canonical	TGCTC(A*)C	A	4453519	-40	expected	1	1	yes	no	yes	0,0,(1)	0,0,(1)	0,0,(1)	0,0,(1)	SRR545691(1;1),
chr19	4700309	-	canonical	TGTTC(A*)C	A	4700289	-20	expected	2	2	yes	yes	yes	0,0,(2)	0,0,(2)	0,0,(1)	0,0,(1)	SRR317039(1;1),SRR307914(1;1),
chr19	5211809	-	canonical	TCCTG(A*)T	A	5211779	-30	expected	1	1	yes	no	yes	0,0,(1)	0,0,(1)	0,0,(1)	0,0,(1)	SRR317065(1;1),
chr19	5218572	-	canonical	TACTA(A*)C	A	5218543	-29	expected	1	1	no	no	yes	1,0,(0)	1,0,(0)	0,0,(0)	0,0,(0)	SRR317065(1;1),
chr19	5693499	-	canonical	TGCTC(A*)C	A	5693473	-26	expected	3	2	yes	yes	yes	0,1,(2)	0,1,(1)	0,0,(2)	0,0,(1)	SRR545692(1;1),SRR545721(2;1),
chr19	5693800	-	canonical	TGTTC(A*)C	A	5693780	-20	expected	1	1	no	no	yes	0,0,(1)	0,0,(1)	0,0,(0)	0,0,(0)	SRR545694(1;1),
chr19	5699238	-	canonical	TGCCC(A*)C	A	5699216	-22	expected	3	1	yes	no	yes	0,3,(0)	0,1,(0)	0,3,(0)	0,1,(0)	SRR545692(3;1),
chr19	5707191	-	canonical	TGCCG(A*)C	A	5707154	-37	expected	1	1	no	no	yes	1,0,(0)	1,0,(0)	0,0,(0)	0,0,(0)	SRR317059(1;1),
chr19	5921353	-	canonical	TGCTT(A*)C	A	5921332	-21	expected	8	1	yes	no	yes	0,0,(8)	0,0,(1)	0,0,(8)	0,0,(1)	SRR545685(8;1),
chr19	5933511	-	canonical	TGTTG(A*)T	A	5933490	-21	expected	1	1	yes	no	yes	0,0,(1)	0,0,(1)	0,0,(1)	0,0,(1)	SRR315317(1;1),
chr19	6590181	-	canonical	TGCTT(A*)C	A	6590147	-34	expected	1	1	yes	no	yes	1,0,(0)	1,0,(0)	1,0,(0)	1,0,(0)	SRR545688(1;1),
chr19	7692769	-	canonical	AGCTG(A*)C	A	7692737	-32	expected	5	2	yes	yes	yes	5,0,(0)	2,0,(0)	1,0,(0)	1,0,(0)	SRR545694(4;1),SRR317049(1;1),
chr19	7996091	-	canonical	TGCTT(A*)T	A	7996073	-18	expected	1	1	no	no	yes	0,1,(0)	0,1,(0)	0,0,(0)	0,0,(0)	SRR317049(1;1),
chr19	7998480	-	canonical	CGCTC(A*)C	A	7998455	-25	expected	1	1	yes	no	yes	0,0,(1)	0,0,(1)	0,0,(1)	0,0,(1)	SRR315311(1;1),
chr19	10248703	-	canonical	TGTTG(A*)C	A	10248685	-18	expected	10	5	yes	yes	yes	0,0,(10)	0,0,(5)	0,0,(9)	0,0,(4)	SRR545712(6;1),SRR317065(2;2),SRR534334(1;1),SRR545694(1;1),
chr19	10273447	-	canonical	TACTT(G*)C	G	10273424	-23	expected	2	1	no	no	yes	2,0,(0)	1,0,(0)	0,0,(0)	0,0,(0)	SRR545708(2;1),
chr19	10489121	-	canonical	AGCTG(A*)C	A	10489102	-19	expected	1	1	no	no	yes	1,0,(0)	1,0,(0)	0,0,(0)	0,0,(0)	SRR317062(1;1),
chr19	11363248	-	canonical	TGTTT(A*)C	A	11363226	-22	expected	6	2	no	yes	yes	0,0,(6)	0,0,(2)	0,0,(0)	0,0,(0)	SRR317044(3;1),SRR534326(3;1),
chr19	12157275	-	canonical	TACTA(A*)T	A	12157243	-32	expected	1	1	no	no	yes	0,1,(0)	0,1,(0)	0,0,(0)	0,0,(0)	SRR317054(1;1),
chr19	12720044	-	canonical	AACTC(A*)C	A	12720016	-28	expected	1	1	yes	no	yes	0,0,(1)	0,0,(1)	0,0,(1)	0,0,(1)	SRR315310(1;1),
chr19	13339630	-	canonical	CACTA(A*)C	A	13339609	-21	expected	1	1	yes	no	yes	0,0,(1)	0,0,(1)	0,0,(1)	0,0,(1)	SRR534334(1;1),
chr19	14521171	-	canonical	TGCCC(A*)C	A	14521146	-25	expected	6	2	yes	no	yes	0,6,(0)	0,2,(0)	0,6,(0)	0,2,(0)	SRR534318(6;2),
chr19	14590357	-	canonical	CACTC(A*)C	A	14590336	-21	expected	2	2	yes	yes	yes	0,1,(1)	0,1,(1)	0,0,(1)	0,0,(1)	SRR545720(1;1),SRR545707(1;1),
chr19	15374382	-	canonical	AGCTA(A*)C	A	15374359	-23	expected	7	3	yes	yes	yes	1,1,(5)	1,1,(1)	0,0,(5)	0,0,(1)	SRR534317(1;1),SRR545709(5;1),SRR545705(1;1),
chr19	15508111	-	canonical	TGGTG(A*)C	A	15508091	-20	expected	9	4	yes	yes	yes	0,0,(9)	0,0,(4)	0,0,(9)	0,0,(4)	SRR317043(1;1),SRR317049(8;3),
chr19	15521436	-	canonical	TGCTT(G*)T	G	15521405	-31	expected	7	4	no	yes	yes	0,7,(0)	0,4,(0)	0,0,(0)	0,0,(0)	SRR545691(1;1),SRR545707(1;1),SRR545694(4;1),SRR534327(1;1),
chr19	16545325	-	canonical	TACTT(A*)C	A	16545301	-24	expected	2	2	yes	no	yes	0,0,(2)	0,0,(2)	0,0,(2)	0,0,(2)	SRR545718(2;2),
chr19	16548702	-	canonical	TGTTT(A*)C	A	16548676	-26	expected	2	1	no	no	yes	0,2,(0)	0,1,(0)	0,0,(0)	0,0,(0)	SRR317042(2;1),
chr19	16643585	-	canonical	TGCTC(A*)C	A	16643560	-25	expected	7	4	yes	yes	yes	0,0,(7)	0,0,(4)	0,0,(7)	0,0,(4)	SRR317050(1;1),SRR317043(2;2),SRR545719(4;1),
chr19	17942225	-	canonical	CGCTC(A*)C	A	17942209	-16	expected	2	1	no	no	yes	0,2,(0)	0,1,(0)	0,0,(0)	0,0,(0)	SRR534331(2;1),
chr19	19010613	-	canonical	GGCTC(A*)C	A	19010535	-78	distal	2	2	yes	no	yes	0,0,(2)	0,0,(2)	0,0,(2)	0,0,(2)	SRR317040(2;2),
chr19	19243594	-	canonical	TGCTC(A*)C	A	19243563	-31	expected	3	2	yes	yes	yes	0,0,(3)	0,0,(2)	0,0,(3)	0,0,(2)	SRR545718(1;1),SRR317042(2;1),
chr19	19390219	-	canonical	GGCTC(A*)C	A	19390199	-20	expected	1	1	yes	no	yes	0,0,(1)	0,0,(1)	0,0,(1)	0,0,(1)	SRR317039(1;1),
chr19	19414293	-	canonical	TACTT(A*)T	A	19414257	-36	expected	1	1	no	no	yes	0,0,(1)	0,0,(1)	0,0,(0)	0,0,(0)	SRR545705(1;1),
chr19	19414670	-	canonical	TACTG(A*)C	A	19414656	-14	expected	1	1	no	no	yes	1,0,(0)	1,0,(0)	0,0,(0)	0,0,(0)	SRR317063(1;1),
chr19	19757182	-	canonical	TCCTG(A*)C	A	19757156	-26	expected	2	1	no	no	yes	2,0,(0)	1,0,(0)	0,0,(0)	0,0,(0)	SRR545691(2;1),
chr19	19766008	-	canonical	TGCTG(G*)C	G	19765509	-499	distal	2	1	no	no	yes	0,2,(0)	0,1,(0)	0,0,(0)	0,0,(0)	SRR317049(2;1),
chr19	33116894	-	canonical	TGCTC(A*)T	A	33116872	-22	expected	1	1	yes	no	yes	0,0,(1)	0,0,(1)	0,0,(1)	0,0,(1)	SRR317058(1;1),
chr19	33702466	-	canonical	CGCTG(A*)C	A	33702443	-23	expected	1	1	no	no	yes	1,0,(0)	1,0,(0)	0,0,(0)	0,0,(0)	SRR545692(1;1),
chr19	33879015	-	canonical	TGCTC(A*)T	A	33878987	-28	expected	3	2	yes	no	yes	0,0,(3)	0,0,(2)	0,0,(3)	0,0,(2)	SRR545718(3;2),
chr19	36033006	-	canonical	TGCTG(A*)T	A	36032976	-30	expected	7	3	no	yes	yes	7,0,(0)	3,0,(0)	0,0,(0)	0,0,(0)	SRR317050(2;1),SRR545709(4;1),SRR317036(1;1),
chr19	36685256	-	canonical	TGATC(A*)C	A	36685230	-26	expected	3	2	yes	yes	yes	0,0,(3)	0,0,(2)	0,0,(3)	0,0,(2)	SRR317063(2;1),SRR317068(1;1),
chr19	39332346	-	canonical	TATTT(A*)T	A	39332322	-24	expected	2	2	yes	yes	yes	0,0,(2)	0,0,(2)	0,0,(2)	0,0,(2)	SRR545693(1;1),SRR307914(1;1),
chr19	39334585	-	canonical	GGCTG(A*)C	A	39334554	-31	expected	1	1	no	no	yes	1,0,(0)	1,0,(0)	0,0,(0)	0,0,(0)	SRR317040(1;1),
chr19	40741274	-	canonical	TGCTG(A*)C	A	40741257	-17	expected	2	2	yes	yes	yes	0,0,(2)	0,0,(2)	0,0,(2)	0,0,(2)	SRR534335(1;1),SRR317042(1;1),
chr19	40828308	-	canonical	GACTC(A*)T	A	40828283	-25	expected	2	2	no	no	yes	0,0,(2)	0,0,(2)	0,0,(0)	0,0,(0)	SRR317063(2;2),
chr19	40839862	-	canonical	TGGTG(A*)C	A	40839836	-26	expected	1	1	yes	no	yes	0,0,(1)	0,0,(1)	0,0,(1)	0,0,(1)	SRR307931(1;1),
chr19	41209782	-	canonical	TGATG(A*)T	A	41209760	-22	expected	11	4	no	yes	yes	7,4,(0)	3,1,(0)	0,0,(0)	0,0,(0)	SRR317062(5;1),SRR545719(4;1),SRR307914(2;2),
chr19	41248696	-	canonical	CACTC(A*)C	A	41248675	-21	expected	1	1	yes	no	yes	0,0,(1)	0,0,(1)	0,0,(1)	0,0,(1)	SRR545685(1;1),
chr19	44048410	-	canonical	TGCTT(A*)C	A	44048386	-24	expected	4	3	yes	yes	yes	0,3,(1)	0,2,(1)	0,0,(1)	0,0,(1)	SRR317043(1;1),SRR317044(2;1),SRR317049(1;1),
chr19	46278312	-	canonical	TGCTC(A*)C	A	46278292	-20	expected	4	1	yes	no	yes	0,0,(4)	0,0,(1)	0,0,(4)	0,0,(1)	SRR534318(4;1),
chr19	46351302	-	canonical	TCTTC(A*)C	A	46351259	-43	expected	1	1	no	no	yes	1,0,(0)	1,0,(0)	0,0,(0)	0,0,(0)	SRR317042(1;1),
chr19	47204397	-	canonical	TTCTC(A*)C	A	47204369	-28	expected	1	1	yes	no	yes	0,0,(1)	0,0,(1)	0,0,(1)	0,0,(1)	SRR307924(1;1),
chr19	47234159	-	canonical	GACTC(A*)T	A	47234130	-29	expected	14	7	yes	yes	yes	0,0,(14)	0,0,(7)	0,0,(14)	0,0,(7)	SRR315308(1;1),SRR315318(1;1),SRR545707(2;1),SRR317063(5;2),SRR317045(2;1),SRR545685(3;1),
chr19	47285850	-	canonical	TGCAG(G*)T	G	47285806	-44	expected	1	1	no	no	yes	0,1,(0)	0,1,(0)	0,0,(0)	0,0,(0)	SRR315311(1;1),
chr19	47571155	-	canonical	CACTC(A*)C	A	47571126	-29	expected	7	2	yes	yes	yes	0,0,(7)	0,0,(2)	0,0,(1)	0,0,(1)	SRR534289(1;1),SRR534318(6;1),
chr19	47994141	-	canonical	TACTA(A*)C	A	47994113	-28	expected	1	1	yes	no	yes	0,0,(1)	0,0,(1)	0,0,(1)	0,0,(1)	SRR534289(1;1),
chr19	48571171	-	canonical	AACTC(A*)C	A	48571143	-28	expected	1	1	no	no	yes	0,0,(1)	0,0,(1)	0,0,(0)	0,0,(0)	SRR317066(1;1),
chr19	48624602	-	canonical	TTCTC(A*)T	A	48624579	-23	expected	1	1	yes	no	yes	0,0,(1)	0,0,(1)	0,0,(1)	0,0,(1)	SRR317063(1;1),
chr19	48630630	-	canonical	CACTC(A*)C	A	48630605	-25	expected	1	1	yes	no	yes	0,0,(1)	0,0,(1)	0,0,(1)	0,0,(1)	SRR317063(1;1),
chr19	49120106	-	canonical	AACTT(A*)C	A	49120081	-25	expected	6	6	yes	yes	yes	0,1,(5)	0,1,(5)	0,0,(4)	0,0,(4)	SRR545687(1;1),SRR317042(1;1),SRR317054(1;1),SRR534318(1;1),SRR545711(1;1),SRR315310(1;1),
chr19	49472899	-	canonical	AGCTC(A*)C	A	49472868	-31	expected	2	2	no	no	yes	0,0,(2)	0,0,(2)	0,0,(0)	0,0,(0)	SRR307921(2;2),
chr19	50369723	-	canonical	TCCTG(A*)C	A	50369702	-21	expected	1	1	yes	no	yes	0,0,(1)	0,0,(1)	0,0,(1)	0,0,(1)	SRR315317(1;1),
chr19	50498209	-	canonical	TGTTC(A*)T	A	50498176	-33	expected	6	3	yes	yes	yes	0,0,(6)	0,0,(3)	0,0,(6)	0,0,(3)	SRR317044(4;1),SRR317064(1;1),SRR317036(1;1),
chr19	51857590	-	canonical	TCCTG(A*)C	A	51857562	-28	expected	1	1	yes	no	yes	0,0,(1)	0,0,(1)	0,0,(1)	0,0,(1)	SRR307914(1;1),
chr19	52384730	-	canonical	TAATA(A*)T	A	52384130	-600	distal	2	1	no	no	yes	0,2,(0)	0,1,(0)	0,0,(0)	0,0,(0)	SRR317040(2;1),
chr19	52580362	-	canonical	TGCTC(A*)T	A	52580337	-25	expected	1	1	yes	no	yes	0,0,(1)	0,0,(1)	0,0,(1)	0,0,(1)	SRR315306(1;1),
chr19	52663869	-	canonical	TGCTC(A*)T	A	52663844	-25	expected	1	1	yes	no	yes	0,0,(1)	0,0,(1)	0,0,(1)	0,0,(1)	SRR317039(1;1),
chr19	55556703	-	canonical	TGTGG(A*)C	A	55556677	-26	expected	1	1	yes	no	yes	0,0,(1)	0,0,(1)	0,0,(1)	0,0,(1)	SRR317052(1;1),
chr19	55665593	-	canonical	TACCC(A*)C	A	55665574	-19	expected	5	1	no	no	yes	0,5,(0)	0,1,(0)	0,0,(0)	0,0,(0)	SRR545686(5;1),
chr19	55743599	-	canonical	AGCTG(A*)C	A	55743579	-20	expected	1	1	no	no	yes	0,0,(1)	0,0,(1)	0,0,(0)	0,0,(0)	SRR307914(1;1),
chr19	55753035	-	canonical	GGCTC(A*)C	A	55753007	-28	expected	16	12	yes	yes	yes	0,4,(12)	0,3,(9)	0,0,(11)	0,0,(8)	SRR307914(1;1),SRR317042(1;1),SRR534289(3;3),SRR545714(1;1),SRR545707(5;2),SRR545694(2;1),SRR317035(1;1),SRR317039(1;1),SRR317064(1;1),
chr19	57328967	-	canonical	TATTT(A*)C	A	57328947	-20	expected	3	3	yes	yes	yes	0,0,(3)	0,0,(3)	0,0,(3)	0,0,(3)	SRR317054(2;2),SRR317048(1;1),
chr19	58597668	-	canonical	TGTTG(A*)T	A	58597633	-35	expected	1	1	yes	no	yes	0,0,(1)	0,0,(1)	0,0,(1)	0,0,(1)	SRR317039(1;1),
chr19	582258	+	canonical	TGCTG(A*)C	A	582305	-47	expected	3	2	yes	yes	yes	1,0,(2)	1,0,(1)	0,0,(2)	0,0,(1)	SRR317043(2;1),SRR317038(1;1),
chr19	806386	+	canonical	CGCTC(A*)T	A	806407	-21	expected	13	8	yes	yes	yes	0,0,(13)	0,0,(8)	0,0,(13)	0,0,(8)	SRR534318(5;2),SRR534317(1;1),SRR545719(2;1),SRR545718(1;1),SRR315311(1;1),SRR545706(2;1),SRR534334(1;1),
chr19	810523	+	canonical	GGCTC(A*)C	A	810542	-19	expected	1	1	yes	no	yes	0,0,(1)	0,0,(1)	0,0,(1)	0,0,(1)	SRR545692(1;1),
chr19	1054552	+	canonical	AGCTG(A*)T	A	1054568	-16	expected	1	1	no	no	yes	1,0,(0)	1,0,(0)	0,0,(0)	0,0,(0)	SRR317043(1;1),
chr19	1221179	+	canonical	GACTG(A*)C	A	1221211	-32	expected	5	2	no	yes	yes	5,0,(0)	2,0,(0)	0,0,(0)	0,0,(0)	SRR545706(2;1),SRR545694(3;1),
chr19	1244715	+	canonical	CGCTT(A*)C	A	1244735	-20	expected	2	2	yes	yes	yes	0,1,(1)	0,1,(1)	0,1,(0)	0,1,(0)	SRR545717(1;1),SRR545701(1;1),
chr19	1254879	+	canonical	TGCTC(A*)T	A	1254900	-21	expected	3	2	yes	yes	yes	3,0,(0)	2,0,(0)	1,0,(0)	1,0,(0)	SRR317048(1;1),SRR317063(2;1),
chr19	1255401	+	canonical	CACTC(A*)C	A	1255420	-19	expected	6	4	yes	yes	yes	0,0,(6)	0,0,(4)	0,0,(6)	0,0,(4)	SRR545685(4;2),SRR545707(1;1),SRR317068(1;1),
chr19	1271530	+	canonical	TACTC(A*)C	A	1271549	-19	expected	1	1	yes	no	yes	0,1,(0)	0,1,(0)	0,1,(0)	0,1,(0)	SRR317040(1;1),
chr19	1428839	+	canonical	TGTTT(A*)G	A	1428840	-1	proximal	1	1	no	no	yes	0,0,(1)	0,0,(1)	0,0,(0)	0,0,(0)	SRR545692(1;1),
chr19	1438783	+	canonical	CGCTG(A*)C	A	1438805	-22	expected	10	4	yes	yes	yes	1,0,(9)	1,0,(3)	0,0,(9)	0,0,(3)	SRR545703(3;2),SRR534325(1;1),SRR534318(6;1),
chr19	1440318	+	canonical	AGCTG(A*)C	A	1440347	-29	expected	1	1	no	no	yes	1,0,(0)	1,0,(0)	0,0,(0)	0,0,(0)	SRR317036(1;1),
chr19	1918101	+	canonical	TGCTC(A*)T	A	1918125	-24	expected	3	1	yes	no	yes	0,0,(3)	0,0,(1)	0,0,(3)	0,0,(1)	SRR534325(3;1),
chr19	2199863	+	canonical	CGCTC(A*)C	A	2199882	-19	expected	2	1	no	no	yes	0,2,(0)	0,1,(0)	0,0,(0)	0,0,(0)	SRR534318(2;1),
chr19	2213516	+	canonical	TAGTC(A*)C	A	2213537	-21	expected	3	2	yes	yes	yes	0,0,(3)	0,0,(2)	0,0,(2)	0,0,(1)	SRR307914(1;1),SRR545712(2;1),
chr19	2217738	+	canonical	TGTTG(A*)C	A	2217770	-32	expected	2	1	no	no	yes	2,0,(0)	1,0,(0)	0,0,(0)	0,0,(0)	SRR545692(2;1),
chr19	2243359	+	canonical	TCCTC(A*)C	A	2243380	-21	expected	7	6	yes	yes	yes	0,0,(7)	0,0,(6)	0,0,(7)	0,0,(6)	SRR545718(2;2),SRR534318(3;2),SRR534335(1;1),SRR545694(1;1),
chr19	2272721	+	canonical	CGCTG(A*)C	A	2272733	-12	expected	16	5	yes	yes	yes	6,0,(10)	2,0,(3)	0,0,(10)	0,0,(3)	SRR545715(4;1),SRR315312(1;1),SRR545707(2;1),SRR545714(3;1),SRR545719(6;1),
chr19	3522929	+	canonical	CACTC(A*)C	A	3522953	-24	expected	2	1	yes	no	yes	0,0,(2)	0,0,(1)	0,0,(2)	0,0,(1)	SRR545703(2;1),
chr19	3573265	+	canonical	TACTC(A*)C	A	3573289	-24	expected	1	1	yes	no	yes	0,0,(1)	0,0,(1)	0,0,(1)	0,0,(1)	SRR545715(1;1),
chr19	4222648	+	canonical	CGCTG(A*)C	A	4222666	-18	expected	4	4	yes	yes	yes	3,1,(0)	3,1,(0)	2,1,(0)	2,1,(0)	SRR307923(1;1),SRR307924(3;3),
chr19	4251000	+	canonical	AGCTC(A*)C	A	4251023	-23	expected	1	1	yes	no	yes	0,0,(1)	0,0,(1)	0,0,(1)	0,0,(1)	SRR315318(1;1),
chr19	4423780	+	canonical	TTCTC(A*)T	A	4423802	-22	expected	1	1	yes	no	yes	0,0,(1)	0,0,(1)	0,0,(1)	0,0,(1)	SRR317049(1;1),
chr19	4910859	+	canonical	AACTG(A*)T	A	4910887	-28	expected	2	1	no	no	yes	2,0,(0)	1,0,(0)	0,0,(0)	0,0,(0)	SRR534334(2;1),
chr19	5650966	+	canonical	TTTTT(A*)C	A	5650988	-22	expected	3	3	yes	yes	yes	0,0,(3)	0,0,(3)	0,0,(2)	0,0,(2)	SRR317036(1;1),SRR315305(2;2),
chr19	5654355	+	canonical	CACTT(A*)C	A	5654378	-23	expected	2	2	yes	yes	yes	0,1,(1)	0,1,(1)	0,0,(1)	0,0,(1)	SRR317052(1;1),SRR317050(1;1),
chr19	7524768	+	canonical	TACCC(A*)C	A	7524788	-20	expected	1	1	yes	no	yes	0,1,(0)	0,1,(0)	0,1,(0)	0,1,(0)	SRR317067(1;1),
chr19	7676382	+	canonical	TAGTG(A*)C	A	7676402	-20	expected	10	2	yes	yes	yes	0,10,(0)	0,2,(0)	0,10,(0)	0,2,(0)	SRR317063(1;1),SRR545685(9;1),
chr19	7977006	+	canonical	TTCTC(A*)C	A	7977033	-27	expected	1	1	no	no	yes	0,1,(0)	0,1,(0)	0,0,(0)	0,0,(0)	SRR317054(1;1),
chr19	8528316	+	canonical	TATTT(A*)C	A	8528380	-64	distal	1	1	yes	no	yes	0,0,(1)	0,0,(1)	0,0,(1)	0,0,(1)	SRR317055(1;1),
chr19	9267919	+	canonical	CGCTG(A*)C	A	9267943	-24	expected	2	2	no	yes	yes	1,1,(0)	1,1,(0)	0,0,(0)	0,0,(0)	SRR315318(1;1),SRR317042(1;1),
chr19	10663530	+	canonical	TGTTT(G*)T	G	10663560	-30	expected	3	1	no	no	yes	0,3,(0)	0,1,(0)	0,0,(0)	0,0,(0)	SRR534334(3;1),
chr19	10906679	+	canonical	TGCTG(A*)C	A	10906736	-57	expected	13	6	yes	yes	yes	3,4,(6)	3,1,(2)	0,4,(6)	0,1,(2)	SRR545701(5;1),SRR545692(1;1),SRR317055(1;1),SRR545720(4;1),SRR317063(1;1),SRR317042(1;1),
chr19	10912940	+	canonical	TACTC(A*)C	A	10912963	-23	expected	12	3	no	yes	yes	0,1,(11)	0,1,(2)	0,0,(0)	0,0,(0)	SRR317036(1;1),SRR317051(1;1),SRR317057(10;1),
chr19	10940782	+	canonical	AGCTC(A*)C	A	10940802	-20	expected	26	13	yes	yes	yes	2,10,(14)	2,4,(7)	0,5,(8)	0,1,(6)	SRR545694(8;2),SRR545717(3;2),SRR545685(5;1),SRR545719(3;1),SRR317036(1;1),SRR534289(1;1),SRR317039(3;3),SRR534335(1;1),SRR317059(1;1),
chr19	11095920	+	canonical	TGCTG(A*)C	A	11095948	-28	expected	6	4	yes	yes	yes	5,0,(1)	3,0,(1)	0,0,(1)	0,0,(1)	SRR545707(3;1),SRR315321(1;1),SRR317050(1;1),SRR317052(1;1),
chr19	11121031	+	canonical	TCCTT(A*)C	A	11121056	-25	expected	3	2	yes	yes	yes	0,2,(1)	0,1,(1)	0,0,(1)	0,0,(1)	SRR534334(2;1),SRR317065(1;1),
chr19	11136953	+	canonical	CACTG(A*)C	A	11136975	-22	expected	4	2	no	yes	yes	4,0,(0)	2,0,(0)	0,0,(0)	0,0,(0)	SRR545713(3;1),SRR317042(1;1),
chr19	11151951	+	canonical	TGCTG(G*)C	G	11151973	-22	expected	1	1	no	no	yes	0,0,(1)	0,0,(1)	0,0,(0)	0,0,(0)	SRR545703(1;1),
chr19	11241953	+	canonical	TGTTG(G*)C	G	11241956	-3	proximal	1	1	yes	no	yes	0,0,(1)	0,0,(1)	0,0,(1)	0,0,(1)	SRR307931(1;1),
chr19	11350788	+	canonical	TACTA(G*)T	G	11350810	-22	expected	6	2	no	yes	yes	6,0,(0)	2,0,(0)	0,0,(0)	0,0,(0)	SRR317055(1;1),SRR317048(5;1),
chr19	15752204	+	canonical	CACTC(A*)C	A	15752224	-20	expected	1	1	yes	no	yes	0,0,(1)	0,0,(1)	0,0,(1)	0,0,(1)	SRR317062(1;1),
chr19	16238811	+	canonical	TGCTC(A*)T	A	16238835	-24	expected	24	10	yes	yes	yes	0,0,(24)	0,0,(10)	0,0,(24)	0,0,(10)	SRR545708(3;1),SRR545692(2;1),SRR317035(1;1),SRR545720(3;2),SRR545685(7;2),SRR317050(1;1),SRR545717(1;1),SRR545706(6;1),
chr19	16240344	+	canonical	GACTC(A*)C	A	16240363	-19	expected	2	1	no	no	yes	0,0,(2)	0,0,(1)	0,0,(0)	0,0,(0)	SRR545723(2;1),
chr19	16628013	+	canonical	TGGTG(A*)T	A	16628040	-27	expected	1	1	yes	no	yes	0,0,(1)	0,0,(1)	0,0,(1)	0,0,(1)	SRR317049(1;1),
chr19	16957748	+	canonical	GACTA(A*)C	A	16957780	-32	expected	5	5	yes	yes	yes	1,2,(2)	1,2,(2)	0,0,(2)	0,0,(2)	SRR545701(1;1),SRR317054(1;1),SRR545717(2;2),SRR317044(1;1),
chr19	17301871	+	canonical	CACTC(A*)C	A	17301905	-34	expected	1	1	yes	no	yes	0,0,(1)	0,0,(1)	0,0,(1)	0,0,(1)	SRR315311(1;1),
chr19	17317462	+	canonical	AGCTG(A*)C	A	17317487	-25	expected	3	2	yes	yes	yes	2,0,(1)	1,0,(1)	0,0,(1)	0,0,(1)	SRR545720(1;1),SRR534327(2;1),
chr19	17389635	+	canonical	CACTG(A*)C	A	17389653	-18	expected	2	1	yes	no	yes	0,0,(2)	0,0,(1)	0,0,(2)	0,0,(1)	SRR317044(2;1),
chr19	17448794	+	canonical	CGCTG(A*)T	A	17448816	-22	expected	3	2	no	yes	yes	3,0,(0)	2,0,(0)	0,0,(0)	0,0,(0)	SRR317064(2;1),SRR317049(1;1),
chr19	17535716	+	canonical	TGTTC(A*)C	A	17535739	-23	expected	1	1	yes	no	yes	0,0,(1)	0,0,(1)	0,0,(1)	0,0,(1)	SRR315310(1;1),
chr19	17678192	+	canonical	TGCTG(A*)T	A	17678214	-22	expected	1	1	no	no	yes	1,0,(0)	1,0,(0)	0,0,(0)	0,0,(0)	SRR307913(1;1),
chr19	17843972	+	canonical	AGCTC(A*)T	A	17844001	-29	expected	2	2	yes	no	yes	0,0,(2)	0,0,(2)	0,0,(2)	0,0,(2)	SRR534318(2;2),
chr19	18054033	+	canonical	TGCTT(A*)T	A	18054069	-36	expected	2	2	yes	no	yes	0,0,(2)	0,0,(2)	0,0,(2)	0,0,(2)	SRR317063(2;2),
chr19	18273757	+	canonical	TGCCG(A*)C	A	18273776	-19	expected	1	1	no	no	yes	1,0,(0)	1,0,(0)	0,0,(0)	0,0,(0)	SRR545694(1;1),
chr19	18702895	+	canonical	TATTT(A*)T	A	18702917	-22	expected	1	1	yes	no	yes	0,0,(1)	0,0,(1)	0,0,(1)	0,0,(1)	SRR317049(1;1),
chr19	18966977	+	canonical	TGCTG(A*)C	A	18966994	-17	expected	3	2	yes	yes	yes	0,0,(3)	0,0,(2)	0,0,(3)	0,0,(2)	SRR315318(2;1),SRR317043(1;1),
chr19	18972799	+	canonical	TAGTG(A*)C	A	18972818	-19	expected	3	3	yes	yes	yes	0,0,(3)	0,0,(3)	0,0,(3)	0,0,(3)	SRR317064(1;1),SRR317066(1;1),SRR317039(1;1),
chr19	19035670	+	canonical	AGCTG(A*)C	A	19035690	-20	expected	2	2	no	yes	yes	2,0,(0)	2,0,(0)	0,0,(0)	0,0,(0)	SRR317065(1;1),SRR317049(1;1),
chr19	19459678	+	canonical	TGCTG(A*)C	A	19459697	-19	expected	7	3	yes	yes	yes	6,0,(1)	2,0,(1)	0,0,(1)	0,0,(1)	SRR317043(1;1),SRR545694(5;1),SRR545718(1;1),
chr19	19466058	+	canonical	TGCTC(A*)T	A	19466072	-14	expected	1	1	no	no	yes	0,0,(1)	0,0,(1)	0,0,(0)	0,0,(0)	SRR545690(1;1),
chr19	33464301	+	canonical	AGCTT(A*)T	A	33464331	-30	expected	1	1	no	no	yes	0,1,(0)	0,1,(0)	0,0,(0)	0,0,(0)	SRR317042(1;1),
chr19	33587085	+	canonical	GACTC(A*)C	A	33587112	-27	expected	1	1	yes	no	yes	0,0,(1)	0,0,(1)	0,0,(1)	0,0,(1)	SRR317043(1;1),
chr19	34890772	+	canonical	TCCTC(A*)T	A	34890805	-33	expected	1	1	yes	no	yes	0,0,(1)	0,0,(1)	0,0,(1)	0,0,(1)	SRR307931(1;1),
chr19	34986578	+	canonical	TGCTC(A*)T	A	34986607	-29	expected	10	2	no	yes	yes	0,10,(0)	0,2,(0)	0,0,(0)	0,0,(0)	SRR545686(8;1),SRR534335(2;1),
chr19	35646429	+	canonical	GGCTG(A*)C	A	35646453	-24	expected	1	1	no	no	yes	1,0,(0)	1,0,(0)	0,0,(0)	0,0,(0)	SRR545718(1;1),
chr19	36104615	+	canonical	TGCTT(A*)C	A	36104631	-16	expected	2	1	no	no	yes	0,2,(0)	0,1,(0)	0,0,(0)	0,0,(0)	SRR545718(2;1),
chr19	36125126	+	canonical	TACCA(A*)C	A	36125157	-31	expected	1	1	yes	no	yes	0,0,(1)	0,0,(1)	0,0,(1)	0,0,(1)	SRR315306(1;1),
chr19	36224646	+	canonical	TCCTG(A*)C	A	36224663	-17	expected	5	1	no	no	yes	5,0,(0)	1,0,(0)	0,0,(0)	0,0,(0)	SRR545721(5;1),
chr19	36368934	+	canonical	TGCTG(A*)T	A	36368983	-49	expected	2	2	no	no	yes	2,0,(0)	2,0,(0)	0,0,(0)	0,0,(0)	SRR317062(2;2),
chr19	36583550	+	canonical	TGCTT(A*)C	A	36583590	-40	expected	7	7	yes	yes	yes	2,0,(5)	2,0,(5)	0,0,(5)	0,0,(5)	SRR534334(1;1),SRR534289(1;1),SRR317063(1;1),SRR545692(1;1),SRR545704(1;1),SRR317062(2;2),
chr19	36584910	+	canonical	TCCTT(A*)C	A	36584932	-22	expected	3	3	yes	yes	yes	0,2,(1)	0,2,(1)	0,0,(1)	0,0,(1)	SRR307913(1;1),SRR315312(2;2),
[truncated: 41,445 more rows]
