# Supplementary material for: TechCrunch Interview With Mark Zuckerberg On $100 Million Education Donation
Source: HighWire-hosted journal article supplement (doi:10.1101/gr.202820.115), 2010-01-01
Supplement: Supplemental_Table_S3.xlsx [file Supplemental_Table_S3.xlsx]

## Sheet: BP_table_5_mouse.txt
Branchpoint coordinate			Motif Model	Branchpoint Sequence - ( ) around bulge, * - BP nucleotide	BP nucleotide	3'ss	BP-3'ss distance	BP position	Total Read Evidence	Unique Read Evidence	Mutation in at Least 1 Read	Discovered in Multiple RNAseq Sources	Discovered in unbiased RNAseq source	Total Read Count (by position)	Unique Read Count (by position)	Read Count with Mutation (by position)	Unique Read Count with Mutation (by position)	RNAseq Source
chr1	10137638	-	canonical	TGCTT(A*)T	A	10137616	-22	expected	1	1	yes	no	yes	0,0,(1)	0,0,(1)	0,0,(1)	0,0,(1)	SRR530636(1;1),
chr1	20800348	-	canonical	TACTG(A*)T	A	20800313	-35	expected	1	1	yes	no	yes	0,0,(1)	0,0,(1)	0,0,(1)	0,0,(1)	SRR530635(1;1),
chr1	33803879	-	canonical	TACTG(A*)C	A	33803861	-18	expected	1	1	no	no	yes	0,0,(1)	0,0,(1)	0,0,(0)	0,0,(0)	SRR530634(1;1),
chr1	36284493	-	canonical	TAGTC(A*)T	A	36284459	-34	expected	2	2	yes	no	yes	0,0,(2)	0,0,(2)	0,0,(2)	0,0,(2)	SRR530639(2;2),
chr1	36408659	-	canonical	TGCTT(A*)C	A	36408635	-24	expected	6	3	yes	yes	yes	0,0,(6)	0,0,(3)	0,0,(6)	0,0,(3)	SRR530637(2;1),SRR530636(4;2),
chr1	36757241	-	canonical	TGCTT(A*)T	A	36757222	-19	expected	1	1	no	no	yes	0,1,(0)	0,1,(0)	0,0,(0)	0,0,(0)	SRR530636(1;1),
chr1	55057252	-	canonical	TACTC(A*)T	A	55057231	-21	expected	1	1	yes	no	yes	0,0,(1)	0,0,(1)	0,0,(1)	0,0,(1)	SRR530637(1;1),
chr1	63211635	-	canonical	TTCTT(A*)T	A	63211604	-31	expected	1	1	yes	no	yes	0,0,(1)	0,0,(1)	0,0,(1)	0,0,(1)	SRR530638(1;1),
chr1	75138108	-	canonical	CACTT(A*)C	A	75138077	-31	expected	2	2	yes	yes	yes	0,0,(2)	0,0,(2)	0,0,(2)	0,0,(2)	SRR530635(1;1),SRR530636(1;1),
chr1	75169572	-	canonical	AACTC(A*)C	A	75169539	-33	expected	1	1	yes	no	yes	0,0,(1)	0,0,(1)	0,0,(1)	0,0,(1)	SRR530634(1;1),
chr1	75172214	-	canonical	GGTTG(A*)T	A	75172191	-23	expected	1	1	no	no	yes	1,0,(0)	1,0,(0)	0,0,(0)	0,0,(0)	SRR530636(1;1),
chr1	80592328	-	canonical	GGCTT(A*)C	A	80592299	-29	expected	1	1	yes	no	yes	0,0,(1)	0,0,(1)	0,0,(1)	0,0,(1)	SRR530637(1;1),
chr1	84754130	-	canonical	TATTC(A*)C	A	84754110	-20	expected	2	2	yes	no	yes	0,0,(2)	0,0,(2)	0,0,(2)	0,0,(2)	SRR530640(2;2),
chr1	88249230	-	canonical	TGCTA(A*)T	A	88249208	-22	expected	1	1	no	no	yes	1,0,(0)	1,0,(0)	0,0,(0)	0,0,(0)	SRR530633(1;1),
chr1	88251750	-	canonical	TTCTC(A*)T	A	88251719	-31	expected	1	1	yes	no	yes	0,0,(1)	0,0,(1)	0,0,(1)	0,0,(1)	SRR530637(1;1),
chr1	88252767	-	canonical	TGCAG(G*)C	G	88251719	-1048	distal	4	4	no	yes	yes	4,0,(0)	4,0,(0)	0,0,(0)	0,0,(0)	SRR530634(1;1),SRR530640(3;3),
chr1	93278584	-	canonical	TGCTC(A*)C	A	93278549	-35	expected	2	2	yes	yes	yes	0,0,(2)	0,0,(2)	0,0,(2)	0,0,(2)	SRR530636(1;1),SRR530634(1;1),
chr1	123452003	-	canonical	TTCTA(A*)T	A	123451970	-33	expected	2	2	no	yes	yes	0,2,(0)	0,2,(0)	0,0,(0)	0,0,(0)	SRR530637(1;1),SRR530635(1;1),
chr1	135535214	-	canonical	TCCTC(A*)T	A	135535190	-24	expected	4	4	yes	yes	yes	0,0,(4)	0,0,(4)	0,0,(4)	0,0,(4)	SRR530636(1;1),SRR530635(1;1),SRR530637(2;2),
chr1	135625488	-	canonical	AGCTC(A*)C	A	135625453	-35	expected	1	1	yes	no	yes	0,0,(1)	0,0,(1)	0,0,(1)	0,0,(1)	SRR530634(1;1),
chr1	137282607	-	canonical	TCCTG(A*)C	A	137282580	-27	expected	1	1	no	no	yes	1,0,(0)	1,0,(0)	0,0,(0)	0,0,(0)	SRR530634(1;1),
chr1	153318571	-	canonical	TTTTC(A*)T	A	153318547	-24	expected	1	1	yes	no	yes	0,0,(1)	0,0,(1)	0,0,(1)	0,0,(1)	SRR530636(1;1),
chr1	154686538	-	canonical	TGCTG(A*)C	A	154686515	-23	expected	1	1	no	no	yes	1,0,(0)	1,0,(0)	0,0,(0)	0,0,(0)	SRR530640(1;1),
chr1	154691556	-	canonical	GGTTG(A*)C	A	154691537	-19	expected	2	2	yes	yes	yes	0,0,(2)	0,0,(2)	0,0,(2)	0,0,(2)	SRR530638(1;1),SRR530636(1;1),
chr1	154715524	-	canonical	TAGTG(A*)T	A	154715499	-25	expected	1	1	yes	no	yes	0,0,(1)	0,0,(1)	0,0,(1)	0,0,(1)	SRR530637(1;1),
chr1	157641804	-	canonical	TCCTG(A*)T	A	157641778	-26	expected	1	1	yes	no	yes	0,0,(1)	0,0,(1)	0,0,(1)	0,0,(1)	SRR530636(1;1),
chr1	162991015	-	canonical	TATTT(A*)C	A	162990990	-25	expected	1	1	yes	no	yes	0,0,(1)	0,0,(1)	0,0,(1)	0,0,(1)	SRR530637(1;1),
chr1	163775506	-	canonical	GGCTC(A*)C	A	163775489	-17	expected	3	2	yes	yes	yes	0,0,(3)	0,0,(2)	0,0,(3)	0,0,(2)	SRR530636(2;1),SRR530635(1;1),
chr1	164628426	-	canonical	TAGTG(A*)C	A	164628404	-22	expected	2	2	yes	no	yes	0,0,(2)	0,0,(2)	0,0,(2)	0,0,(2)	SRR530636(2;2),
chr1	167281430	-	canonical	TGCAT(A*)C	A	167281411	-19	expected	1	1	yes	no	yes	1,0,(0)	1,0,(0)	1,0,(0)	1,0,(0)	SRR530634(1;1),
chr1	172717615	-	canonical	TATTA(A*)T	A	172717591	-24	expected	1	1	yes	no	yes	0,1,(0)	0,1,(0)	0,1,(0)	0,1,(0)	SRR530638(1;1),
chr1	173214885	-	canonical	TGCCC(A*)T	A	173214867	-18	expected	2	2	yes	yes	yes	0,0,(2)	0,0,(2)	0,0,(2)	0,0,(2)	SRR530634(1;1),SRR530640(1;1),
chr1	180260099	-	canonical	TCTTA(A*)C	A	180260070	-29	expected	3	3	yes	yes	yes	0,1,(2)	0,1,(2)	0,0,(2)	0,0,(2)	SRR530640(1;1),SRR530636(2;2),
chr1	181461621	-	canonical	GACTG(A*)C	A	181461595	-26	expected	2	2	no	no	yes	2,0,(0)	2,0,(0)	0,0,(0)	0,0,(0)	SRR530638(2;2),
chr1	181705675	-	canonical	TATTT(A*)T	A	181705650	-25	expected	1	1	no	no	yes	0,0,(1)	0,0,(1)	0,0,(0)	0,0,(0)	SRR530638(1;1),
chr1	183747724	-	canonical	TACTA(A*)C	A	183747700	-24	expected	1	1	yes	no	yes	0,0,(1)	0,0,(1)	0,0,(1)	0,0,(1)	SRR530639(1;1),
chr1	186643251	-	canonical	TGATG(A*)C	A	186643226	-25	expected	3	3	yes	yes	yes	0,0,(3)	0,0,(3)	0,0,(3)	0,0,(3)	SRR530637(1;1),SRR530635(2;2),
chr1	190800613	-	canonical	TCCTC(A*)C	A	190800586	-27	expected	1	1	yes	no	yes	0,0,(1)	0,0,(1)	0,0,(1)	0,0,(1)	SRR530637(1;1),
chr1	190811536	-	canonical	GACTG(A*)C	A	190811510	-26	expected	2	2	no	no	yes	2,0,(0)	2,0,(0)	0,0,(0)	0,0,(0)	SRR530636(2;2),
chr1	5140006	+	canonical	TCTTC(A*)C	A	5140028	-22	expected	1	1	yes	no	yes	0,0,(1)	0,0,(1)	0,0,(1)	0,0,(1)	SRR530636(1;1),
chr1	16121122	+	canonical	TGTTA(A*)T	A	16121155	-33	expected	1	1	yes	no	yes	0,0,(1)	0,0,(1)	0,0,(1)	0,0,(1)	SRR530634(1;1),
chr1	38098516	+	canonical	CACTT(A*)C	A	38098541	-25	expected	1	1	yes	no	yes	0,0,(1)	0,0,(1)	0,0,(1)	0,0,(1)	SRR530636(1;1),
chr1	39602004	+	canonical	TGCAG(G*)C	G	39958353	-356349	distal	1	1	no	no	yes	0,1,(0)	0,1,(0)	0,0,(0)	0,0,(0)	SRR530639(1;1),
chr1	40501150	+	canonical	TAATT(A*)T	A	40501178	-28	expected	1	1	yes	no	yes	0,0,(1)	0,0,(1)	0,0,(1)	0,0,(1)	SRR530634(1;1),
chr1	55121002	+	canonical	TGTTA(A*)C	A	55121024	-22	expected	1	1	no	no	yes	1,0,(0)	1,0,(0)	0,0,(0)	0,0,(0)	SRR530636(1;1),
chr1	59761436	+	canonical	TGTAT(A*)C	A	59761467	-31	expected	1	1	yes	no	yes	0,0,(1)	0,0,(1)	0,0,(1)	0,0,(1)	SRR530637(1;1),
chr1	63225797	+	canonical	TGTTT(A*)G	A	63225821	-24	expected	1	1	yes	no	yes	0,0,(1)	0,0,(1)	0,0,(1)	0,0,(1)	SRR530636(1;1),
chr1	65305333	+	canonical	GACTC(A*)T	A	65305356	-23	expected	2	2	yes	no	yes	0,0,(2)	0,0,(2)	0,0,(2)	0,0,(2)	SRR530636(2;2),
chr1	71619457	+	canonical	TACTT(A*)C	A	71619481	-24	expected	1	1	yes	no	yes	0,0,(1)	0,0,(1)	0,0,(1)	0,0,(1)	SRR530640(1;1),
chr1	72356965	+	canonical	TGCTA(A*)T	A	72357008	-43	expected	1	1	yes	no	yes	0,0,(1)	0,0,(1)	0,0,(1)	0,0,(1)	SRR530640(1;1),
chr1	88426518	+	canonical	TAGTC(A*)C	A	88426539	-21	expected	16	13	yes	yes	yes	0,0,(16)	0,0,(13)	0,0,(15)	0,0,(12)	SRR530635(4;4),SRR530636(7;4),SRR530634(2;2),SRR530637(2;2),SRR530640(1;1),
chr1	95672184	+	canonical	TGCTA(A*)C	A	95672204	-20	expected	1	1	yes	no	yes	0,0,(1)	0,0,(1)	0,0,(1)	0,0,(1)	SRR530634(1;1),
chr1	95674837	+	canonical	GGCTC(A*)T	A	95674861	-24	expected	2	2	yes	no	yes	0,0,(2)	0,0,(2)	0,0,(2)	0,0,(2)	SRR530636(2;2),
chr1	108288678	+	canonical	TGCTC(A*)C	A	108288705	-27	expected	2	2	yes	yes	yes	0,0,(2)	0,0,(2)	0,0,(2)	0,0,(2)	SRR530635(1;1),SRR530634(1;1),
chr1	133877833	+	canonical	TACAC(A*)C	A	133877867	-34	expected	1	1	no	no	yes	0,0,(1)	0,0,(1)	0,0,(0)	0,0,(0)	SRR530634(1;1),
chr1	135168760	+	canonical	GACTG(A*)C	A	135168785	-25	expected	1	1	yes	no	yes	0,0,(1)	0,0,(1)	0,0,(1)	0,0,(1)	SRR530634(1;1),
chr1	141353280	+	canonical	TATTT(A*)T	A	141353316	-36	expected	1	1	yes	no	yes	0,0,(1)	0,0,(1)	0,0,(1)	0,0,(1)	SRR530636(1;1),
chr1	154672993	+	canonical	CGCTC(A*)C	A	154673011	-18	expected	1	1	yes	no	yes	0,0,(1)	0,0,(1)	0,0,(1)	0,0,(1)	SRR530638(1;1),
chr1	157910687	+	canonical	CGCTT(A*)C	A	157910722	-35	expected	1	1	yes	no	yes	0,0,(1)	0,0,(1)	0,0,(1)	0,0,(1)	SRR530634(1;1),
chr1	158571085	+	canonical	TGCTC(A*)C	A	158571123	-38	expected	1	1	yes	no	yes	0,0,(1)	0,0,(1)	0,0,(1)	0,0,(1)	SRR530636(1;1),
chr1	162966316	+	canonical	TTTTT(A*)C	A	162966338	-22	expected	6	6	yes	yes	yes	0,0,(6)	0,0,(6)	0,0,(6)	0,0,(6)	SRR530637(1;1),SRR530636(1;1),SRR530634(4;4),
chr1	165869992	+	canonical	TTCTA(A*)T	A	165870011	-19	expected	1	1	no	no	yes	1,0,(0)	1,0,(0)	0,0,(0)	0,0,(0)	SRR530637(1;1),
chr1	165870205	+	canonical	TGCAG(G*)C	G	165871151	-946	distal	1	1	no	no	yes	0,0,(1)	0,0,(1)	0,0,(0)	0,0,(0)	SRR530636(1;1),
chr1	174060722	+	canonical	TGTTC(A*)C	A	174060742	-20	expected	2	1	yes	no	yes	0,0,(2)	0,0,(1)	0,0,(2)	0,0,(1)	SRR530636(2;1),
chr1	174428463	+	canonical	TTCTC(A*)C	A	174428487	-24	expected	1	1	yes	no	yes	0,0,(1)	0,0,(1)	0,0,(1)	0,0,(1)	SRR530637(1;1),
chr1	176123599	+	canonical	TATTT(A*)C	A	176123659	-60	expected	1	1	yes	no	yes	0,0,(1)	0,0,(1)	0,0,(1)	0,0,(1)	SRR530636(1;1),
chr1	187091016	+	canonical	TGCTT(A*)C	A	187091051	-35	expected	2	1	yes	no	yes	0,0,(2)	0,0,(1)	0,0,(2)	0,0,(1)	SRR530637(2;1),
chr1	187106145	+	canonical	TACTG(A*)C	A	187106176	-31	expected	1	1	yes	no	yes	0,0,(1)	0,0,(1)	0,0,(1)	0,0,(1)	SRR530633(1;1),
chr1	187203388	+	canonical	TGCTT(A*)C	A	187203423	-35	expected	1	1	no	no	yes	0,1,(0)	0,1,(0)	0,0,(0)	0,0,(0)	SRR530635(1;1),
chr1	194991939	+	canonical	TGCTT(A*)C	A	194991959	-20	expected	2	1	no	no	yes	0,2,(0)	0,1,(0)	0,0,(0)	0,0,(0)	SRR530638(2;1),
chr10	6262826	-	canonical	AGCTC(A*)T	A	6262804	-22	expected	1	1	no	no	yes	1,0,(0)	1,0,(0)	0,0,(0)	0,0,(0)	SRR530640(1;1),
chr10	18722853	-	canonical	TCCTG(A*)C	A	18722821	-32	expected	1	1	yes	no	yes	0,1,(0)	0,1,(0)	0,1,(0)	0,1,(0)	SRR530637(1;1),
chr10	23505505	-	canonical	TGTTA(G*)T	G	23505483	-22	expected	4	4	yes	yes	yes	0,3,(1)	0,3,(1)	0,3,(1)	0,3,(1)	SRR530639(3;3),SRR530635(1;1),
chr10	23506865	-	canonical	TACTG(A*)T	A	23506850	-15	expected	4	4	no	yes	yes	4,0,(0)	4,0,(0)	0,0,(0)	0,0,(0)	SRR530637(1;1),SRR530638(2;2),SRR530634(1;1),
chr10	30328256	-	canonical	TATTC(A*)T	A	30328229	-27	expected	1	1	yes	no	yes	0,0,(1)	0,0,(1)	0,0,(1)	0,0,(1)	SRR530636(1;1),
chr10	60567397	-	canonical	TGCTT(A*)G	A	60567360	-37	expected	2	2	yes	no	yes	0,0,(2)	0,0,(2)	0,0,(2)	0,0,(2)	SRR530639(2;2),
chr10	62480107	-	canonical	TGTAA(A*)C	A	62480085	-22	expected	2	1	yes	no	yes	0,2,(0)	0,1,(0)	0,2,(0)	0,1,(0)	SRR530635(2;1),
chr10	67589526	-	canonical	TGCTT(A*)T	A	67589499	-27	expected	1	1	no	no	yes	0,1,(0)	0,1,(0)	0,0,(0)	0,0,(0)	SRR530639(1;1),
chr10	68807948	-	canonical	GACTC(A*)C	A	68807932	-16	expected	1	1	yes	no	yes	0,0,(1)	0,0,(1)	0,0,(1)	0,0,(1)	SRR530637(1;1),
chr10	74972886	-	canonical	TGCAG(G*)C	G	74972868	-18	expected	1	1	yes	no	yes	1,0,(0)	1,0,(0)	1,0,(0)	1,0,(0)	SRR530636(1;1),
chr10	77455309	-	canonical	GGCTT(A*)C	A	77455283	-26	expected	2	2	yes	yes	yes	0,1,(1)	0,1,(1)	0,0,(1)	0,0,(1)	SRR530635(1;1),SRR530637(1;1),
chr10	77651717	-	canonical	TACCC(A*)T	A	77651695	-22	expected	1	1	yes	no	yes	0,0,(1)	0,0,(1)	0,0,(1)	0,0,(1)	SRR530635(1;1),
chr10	79201579	-	canonical	TGCTG(A*)C	A	79201549	-30	expected	1	1	no	no	yes	1,0,(0)	1,0,(0)	0,0,(0)	0,0,(0)	SRR530635(1;1),
chr10	79442526	-	canonical	TGCTG(A*)C	A	79442498	-28	expected	1	1	no	no	yes	0,0,(1)	0,0,(1)	0,0,(0)	0,0,(0)	SRR530635(1;1),
chr10	79499755	-	canonical	TCCTG(A*)T	A	79499718	-37	expected	3	3	yes	yes	yes	0,0,(3)	0,0,(3)	0,0,(3)	0,0,(3)	SRR530635(1;1),SRR530636(1;1),SRR530637(1;1),
chr10	79520911	-	canonical	AGCTG(A*)C	A	79520891	-20	expected	1	1	yes	no	yes	0,0,(1)	0,0,(1)	0,0,(1)	0,0,(1)	SRR530638(1;1),
chr10	79532821	-	canonical	GGCTC(A*)C	A	79532796	-25	expected	1	1	yes	no	yes	0,0,(1)	0,0,(1)	0,0,(1)	0,0,(1)	SRR530638(1;1),
chr10	80173234	-	canonical	AACTG(A*)C	A	80173212	-22	expected	2	2	yes	yes	yes	0,0,(2)	0,0,(2)	0,0,(2)	0,0,(2)	SRR530635(1;1),SRR530638(1;1),
chr10	80177945	-	canonical	TGCTC(A*)T	A	80177924	-21	expected	1	1	yes	no	yes	0,0,(1)	0,0,(1)	0,0,(1)	0,0,(1)	SRR530634(1;1),
chr10	80183937	-	canonical	TGCAG(A*)C	A	80183913	-24	expected	2	1	yes	no	yes	2,0,(0)	1,0,(0)	2,0,(0)	1,0,(0)	SRR530635(2;1),
chr10	80186600	-	canonical	TGCTG(A*)T	A	80186575	-25	expected	1	1	no	no	yes	1,0,(0)	1,0,(0)	0,0,(0)	0,0,(0)	SRR530637(1;1),
chr10	80510446	-	canonical	TCCTG(A*)C	A	80510421	-25	expected	2	2	yes	no	yes	0,0,(2)	0,0,(2)	0,0,(2)	0,0,(2)	SRR530636(2;2),
chr10	80833600	-	canonical	TGCCT(A*)C	A	80833569	-31	expected	1	1	yes	no	yes	0,0,(1)	0,0,(1)	0,0,(1)	0,0,(1)	SRR530633(1;1),
chr10	80863857	-	canonical	TCCTG(A*)C	A	80863816	-41	expected	1	1	yes	no	yes	0,0,(1)	0,0,(1)	0,0,(1)	0,0,(1)	SRR530639(1;1),
chr10	88278717	-	canonical	TACAG(A*)C	A	88278691	-26	expected	1	1	no	no	yes	1,0,(0)	1,0,(0)	0,0,(0)	0,0,(0)	SRR530639(1;1),
chr10	93046298	-	canonical	AGCTC(A*)C	A	93046275	-23	expected	4	4	yes	yes	yes	0,0,(4)	0,0,(4)	0,0,(3)	0,0,(3)	SRR530637(2;2),SRR530633(1;1),SRR530636(1;1),
chr10	114646745	-	canonical	TACTT(A*)C	A	114646712	-33	expected	2	2	yes	no	yes	0,0,(2)	0,0,(2)	0,0,(2)	0,0,(2)	SRR530636(2;2),
chr10	117138706	-	canonical	TACTC(A*)C	A	117138670	-36	expected	2	1	no	no	yes	0,2,(0)	0,1,(0)	0,0,(0)	0,0,(0)	SRR530640(2;1),
chr10	117173303	-	canonical	TCCTT(A*)C	A	117173289	-14	expected	1	1	yes	no	yes	0,0,(1)	0,0,(1)	0,0,(1)	0,0,(1)	SRR530636(1;1),
chr10	117207326	-	canonical	TGGTC(A*)T	A	117207292	-34	expected	14	13	yes	yes	yes	0,0,(14)	0,0,(13)	0,0,(11)	0,0,(10)	SRR530637(3;3),SRR530638(2;2),SRR530636(6;5),SRR530634(2;2),SRR530635(1;1),
chr10	119532265	-	canonical	TGTTA(A*)C	A	119532247	-18	expected	1	1	yes	no	yes	0,0,(1)	0,0,(1)	0,0,(1)	0,0,(1)	SRR530636(1;1),
chr10	126537062	-	canonical	TGCTC(A*)C	A	126537047	-15	expected	2	2	yes	no	yes	0,0,(2)	0,0,(2)	0,0,(2)	0,0,(2)	SRR530635(2;2),
chr10	126556286	-	canonical	TTCTC(A*)C	A	126556253	-33	expected	1	1	yes	no	yes	0,1,(0)	0,1,(0)	0,1,(0)	0,1,(0)	SRR530637(1;1),
chr10	126723652	-	canonical	AGCTG(A*)C	A	126723628	-24	expected	1	1	no	no	yes	1,0,(0)	1,0,(0)	0,0,(0)	0,0,(0)	SRR530638(1;1),
chr10	126737695	-	canonical	TACTC(A*)C	A	126737636	-59	expected	1	1	yes	no	yes	0,0,(1)	0,0,(1)	0,0,(1)	0,0,(1)	SRR530637(1;1),
chr10	127006110	-	canonical	TTCTC(A*)T	A	127006089	-21	expected	1	1	yes	no	yes	0,0,(1)	0,0,(1)	0,0,(1)	0,0,(1)	SRR530638(1;1),
chr10	24602932	+	canonical	TAGTC(A*)C	A	24603009	-77	distal	1	1	yes	no	yes	0,0,(1)	0,0,(1)	0,0,(1)	0,0,(1)	SRR530636(1;1),
chr10	40196669	+	canonical	TACTG(A*)T	A	40196694	-25	expected	1	1	no	no	yes	1,0,(0)	1,0,(0)	0,0,(0)	0,0,(0)	SRR530636(1;1),
chr10	41248450	+	canonical	TACTT(A*)C	A	41248477	-27	expected	2	2	yes	yes	yes	0,1,(1)	0,1,(1)	0,0,(1)	0,0,(1)	SRR530640(1;1),SRR530637(1;1),
chr10	42548673	+	canonical	TTCTG(A*)C	A	42548696	-23	expected	1	1	no	no	yes	1,0,(0)	1,0,(0)	0,0,(0)	0,0,(0)	SRR530636(1;1),
chr10	43655780	+	canonical	TACTT(A*)C	A	43655804	-24	expected	2	2	yes	yes	yes	0,1,(1)	0,1,(1)	0,0,(1)	0,0,(1)	SRR530637(1;1),SRR530634(1;1),
chr10	51200866	+	canonical	GGCTA(A*)T	A	51200945	-79	distal	1	1	yes	no	yes	1,0,(0)	1,0,(0)	1,0,(0)	1,0,(0)	SRR530637(1;1),
chr10	66694682	+	canonical	TTCTC(A*)T	A	66694719	-37	expected	1	1	yes	no	yes	0,0,(1)	0,0,(1)	0,0,(1)	0,0,(1)	SRR530636(1;1),
chr10	75975138	+	canonical	TCCTC(A*)C	A	75975162	-24	expected	1	1	yes	no	yes	0,0,(1)	0,0,(1)	0,0,(1)	0,0,(1)	SRR530638(1;1),
chr10	76001069	+	canonical	TATTC(A*)T	A	76001096	-27	expected	2	2	yes	no	yes	0,0,(2)	0,0,(2)	0,0,(2)	0,0,(2)	SRR530634(2;2),
chr10	77890028	+	canonical	CACTC(A*)C	A	77890055	-27	expected	1	1	yes	no	yes	0,0,(1)	0,0,(1)	0,0,(1)	0,0,(1)	SRR530637(1;1),
chr10	79172391	+	canonical	AGCTT(A*)T	A	79172415	-24	expected	3	2	yes	yes	yes	0,0,(3)	0,0,(2)	0,0,(3)	0,0,(2)	SRR530640(2;1),SRR530637(1;1),
chr10	79323544	+	canonical	GGCTC(A*)C	A	79323568	-24	expected	12	11	yes	yes	yes	1,0,(11)	1,0,(10)	0,0,(10)	0,0,(9)	SRR530639(2;2),SRR530636(4;3),SRR530634(3;3),SRR530637(3;3),
chr10	79394482	+	canonical	TCCTG(A*)C	A	79394510	-28	expected	1	1	no	no	yes	1,0,(0)	1,0,(0)	0,0,(0)	0,0,(0)	SRR530636(1;1),
chr10	79477997	+	canonical	GGCTG(A*)C	A	79478050	-53	expected	2	1	yes	no	yes	0,0,(2)	0,0,(1)	0,0,(2)	0,0,(1)	SRR530635(2;1),
chr10	80075059	+	canonical	TGTTC(A*)C	A	80075086	-27	expected	1	1	no	no	yes	0,0,(1)	0,0,(1)	0,0,(0)	0,0,(0)	SRR530635(1;1),
chr10	80253039	+	canonical	GACTC(A*)C	A	80253064	-25	expected	1	1	no	no	yes	0,0,(1)	0,0,(1)	0,0,(0)	0,0,(0)	SRR530634(1;1),
chr10	80253332	+	canonical	TGCTC(A*)T	A	80253355	-23	expected	2	1	yes	no	yes	0,0,(2)	0,0,(1)	0,0,(2)	0,0,(1)	SRR530635(2;1),
chr10	80643294	+	canonical	TGCTG(A*)C	A	80643309	-15	expected	1	1	yes	no	yes	0,0,(1)	0,0,(1)	0,0,(1)	0,0,(1)	SRR530637(1;1),
chr10	87623600	+	canonical	TGCTT(A*)C	A	87623620	-20	expected	1	1	yes	no	yes	0,0,(1)	0,0,(1)	0,0,(1)	0,0,(1)	SRR530633(1;1),
chr10	107828731	+	canonical	AGCTG(A*)C	A	107828753	-22	expected	1	1	no	no	yes	1,0,(0)	1,0,(0)	0,0,(0)	0,0,(0)	SRR530634(1;1),
chr10	110927409	+	canonical	TTCTT(A*)C	A	110927432	-23	expected	4	4	yes	yes	yes	0,1,(3)	0,1,(3)	0,0,(1)	0,0,(1)	SRR530639(2;2),SRR530636(2;2),
chr10	110930581	+	canonical	TTCTG(A*)T	A	110930605	-24	expected	2	2	no	no	yes	2,0,(0)	2,0,(0)	0,0,(0)	0,0,(0)	SRR530635(2;2),
chr10	110931210	+	canonical	GACTG(A*)C	A	110931226	-16	expected	2	2	no	yes	yes	2,0,(0)	2,0,(0)	0,0,(0)	0,0,(0)	SRR530633(1;1),SRR530639(1;1),
chr10	114843760	+	canonical	TTTTT(A*)T	A	114843789	-29	expected	1	1	yes	no	yes	0,0,(1)	0,0,(1)	0,0,(1)	0,0,(1)	SRR530636(1;1),
chr10	126712024	+	canonical	AGCTC(A*)T	A	126712049	-25	expected	1	1	yes	no	yes	0,0,(1)	0,0,(1)	0,0,(1)	0,0,(1)	SRR530635(1;1),
chr10	126715146	+	canonical	TGTTA(G*)C	G	126715175	-29	expected	4	4	yes	yes	yes	0,2,(2)	0,2,(2)	0,2,(2)	0,2,(2)	SRR530636(3;3),SRR530635(1;1),
chr10	126766520	+	canonical	TAGTT(A*)T	A	126766554	-34	expected	1	1	yes	no	yes	0,0,(1)	0,0,(1)	0,0,(1)	0,0,(1)	SRR530638(1;1),
chr10	127466220	+	canonical	TTCTG(A*)T	A	127466241	-21	expected	1	1	yes	no	yes	0,0,(1)	0,0,(1)	0,0,(1)	0,0,(1)	SRR530634(1;1),
chr10	127751752	+	canonical	TGTAG(A*)C	A	127751781	-29	expected	1	1	yes	no	yes	1,0,(0)	1,0,(0)	1,0,(0)	1,0,(0)	SRR530636(1;1),
chr10	127760355	+	canonical	TCCTC(A*)C	A	127760385	-30	expected	1	1	no	no	yes	1,0,(0)	1,0,(0)	0,0,(0)	0,0,(0)	SRR530635(1;1),
chr11	3036800	-	canonical	TGTTC(A*)C	A	3036702	-98	distal	1	1	no	no	yes	0,0,(1)	0,0,(1)	0,0,(0)	0,0,(0)	SRR530634(1;1),
chr11	3042433	-	canonical	TCCTC(A*)C	A	3042413	-20	expected	1	1	yes	no	yes	0,0,(1)	0,0,(1)	0,0,(1)	0,0,(1)	SRR530638(1;1),
chr11	3250795	-	canonical	TACTC(A*)C	A	3250776	-19	expected	1	1	no	no	yes	0,1,(0)	0,1,(0)	0,0,(0)	0,0,(0)	SRR530639(1;1),
chr11	4003582	-	canonical	TACAC(A*)C	A	4003560	-22	expected	1	1	no	no	yes	0,0,(1)	0,0,(1)	0,0,(0)	0,0,(0)	SRR530635(1;1),
chr11	4385475	-	canonical	TACTA(A*)C	A	4385454	-21	expected	3	1	yes	no	yes	0,0,(3)	0,0,(1)	0,0,(3)	0,0,(1)	SRR530636(3;1),
chr11	6416895	-	canonical	TGTTA(G*)C	G	6416867	-28	expected	1	1	yes	no	yes	0,0,(1)	0,0,(1)	0,0,(1)	0,0,(1)	SRR530639(1;1),
chr11	6426461	-	canonical	GGCTC(A*)C	A	6426440	-21	expected	2	1	yes	no	yes	0,0,(2)	0,0,(1)	0,0,(2)	0,0,(1)	SRR530637(2;1),
chr11	16881964	-	canonical	TACCC(A*)C	A	16881936	-28	expected	1	1	no	no	yes	0,0,(1)	0,0,(1)	0,0,(0)	0,0,(0)	SRR530637(1;1),
chr11	16895385	-	canonical	TGCTA(A*)C	A	16895358	-27	expected	1	1	yes	no	yes	0,0,(1)	0,0,(1)	0,0,(1)	0,0,(1)	SRR530638(1;1),
chr11	19977357	-	canonical	TGCTG(A*)C	A	19977336	-21	expected	1	1	no	no	yes	1,0,(0)	1,0,(0)	0,0,(0)	0,0,(0)	SRR530634(1;1),
chr11	23392078	-	canonical	TGCAG(G*)C	G	23391582	-496	distal	1	1	no	no	yes	0,1,(0)	0,1,(0)	0,0,(0)	0,0,(0)	SRR530640(1;1),
chr11	29447721	-	canonical	TGCAG(A*)T	A	29447260	-461	distal	1	1	no	no	yes	0,0,(1)	0,0,(1)	0,0,(0)	0,0,(0)	SRR530636(1;1),
chr11	30042460	-	canonical	GACTT(A*)C	A	30042422	-38	expected	2	2	no	no	yes	2,0,(0)	2,0,(0)	0,0,(0)	0,0,(0)	SRR530635(2;2),
chr11	33060951	-	canonical	TGCTG(G*)T	G	33060921	-30	expected	1	1	no	no	yes	0,1,(0)	0,1,(0)	0,0,(0)	0,0,(0)	SRR530635(1;1),
chr11	34509171	-	canonical	TCCTT(A*)T	A	34509003	-168	distal	1	1	no	no	yes	0,1,(0)	0,1,(0)	0,0,(0)	0,0,(0)	SRR530637(1;1),
chr11	40519594	-	canonical	TACTA(A*)T	A	40519570	-24	expected	1	1	no	no	yes	1,0,(0)	1,0,(0)	0,0,(0)	0,0,(0)	SRR530636(1;1),
chr11	40523795	-	canonical	TACTA(A*)C	A	40523778	-17	expected	1	1	no	no	yes	1,0,(0)	1,0,(0)	0,0,(0)	0,0,(0)	SRR530636(1;1),
chr11	49500460	-	canonical	TTCTG(A*)C	A	49500434	-26	expected	1	1	yes	no	yes	0,0,(1)	0,0,(1)	0,0,(1)	0,0,(1)	SRR530635(1;1),
chr11	50016114	-	canonical	TGCTC(A*)C	A	50016096	-18	expected	3	3	yes	yes	yes	0,0,(3)	0,0,(3)	0,0,(1)	0,0,(1)	SRR530635(1;1),SRR530634(1;1),SRR530636(1;1),
chr11	50016556	-	canonical	TGCCC(A*)C	A	50016536	-20	expected	1	1	yes	no	yes	0,0,(1)	0,0,(1)	0,0,(1)	0,0,(1)	SRR530636(1;1),
chr11	50110923	-	canonical	TAATC(A*)T	A	50110896	-27	expected	1	1	yes	no	yes	0,0,(1)	0,0,(1)	0,0,(1)	0,0,(1)	SRR530638(1;1),
chr11	51437855	-	canonical	TGCTG(G*)T	G	51437648	-207	distal	2	2	no	no	yes	0,2,(0)	0,2,(0)	0,0,(0)	0,0,(0)	SRR530639(2;2),
chr11	59611775	-	canonical	CGCTC(A*)C	A	59611747	-28	expected	1	1	yes	no	yes	0,0,(1)	0,0,(1)	0,0,(1)	0,0,(1)	SRR530636(1;1),
chr11	59777892	-	canonical	TCCTC(A*)C	A	59777868	-24	expected	1	1	yes	no	yes	0,0,(1)	0,0,(1)	0,0,(1)	0,0,(1)	SRR530636(1;1),
chr11	60015426	-	canonical	TCCTG(A*)C	A	60015407	-19	expected	1	1	no	no	yes	1,0,(0)	1,0,(0)	0,0,(0)	0,0,(0)	SRR530640(1;1),
chr11	68806310	-	canonical	TGCTT(A*)C	A	68806288	-22	expected	1	1	yes	no	yes	0,0,(1)	0,0,(1)	0,0,(1)	0,0,(1)	SRR530637(1;1),
chr11	69169003	-	canonical	TGCTG(A*)C	A	69168972	-31	expected	1	1	no	no	yes	1,0,(0)	1,0,(0)	0,0,(0)	0,0,(0)	SRR530637(1;1),
chr11	69215807	-	canonical	GACTG(A*)C	A	69215783	-24	expected	1	1	yes	no	yes	0,0,(1)	0,0,(1)	0,0,(1)	0,0,(1)	SRR530636(1;1),
chr11	69553051	-	canonical	TTCTC(A*)T	A	69553029	-22	expected	3	1	yes	no	yes	0,0,(3)	0,0,(1)	0,0,(3)	0,0,(1)	SRR530636(3;1),
chr11	69559226	-	canonical	TGCTC(A*)T	A	69559203	-23	expected	1	1	no	no	yes	1,0,(0)	1,0,(0)	0,0,(0)	0,0,(0)	SRR530636(1;1),
chr11	70757761	-	canonical	TACTC(A*)C	A	70757740	-21	expected	2	2	yes	no	yes	0,0,(2)	0,0,(2)	0,0,(2)	0,0,(2)	SRR530639(2;2),
chr11	77981413	-	canonical	GGCTG(A*)T	A	77981388	-25	expected	2	2	yes	yes	yes	0,0,(2)	0,0,(2)	0,0,(2)	0,0,(2)	SRR530636(1;1),SRR530635(1;1),
chr11	77985494	-	canonical	TGCTG(G*)T	G	77984800	-694	distal	1	1	yes	no	yes	1,0,(0)	1,0,(0)	1,0,(0)	1,0,(0)	SRR530639(1;1),
chr11	78858789	-	canonical	TTCTG(A*)C	A	78858770	-19	expected	1	1	no	no	yes	1,0,(0)	1,0,(0)	0,0,(0)	0,0,(0)	SRR530637(1;1),
chr11	80177539	-	canonical	TACTT(A*)C	A	80177520	-19	expected	1	1	yes	no	yes	0,0,(1)	0,0,(1)	0,0,(1)	0,0,(1)	SRR530634(1;1),
chr11	84667691	-	canonical	TTTTC(A*)C	A	84667669	-22	expected	1	1	yes	no	yes	0,0,(1)	0,0,(1)	0,0,(1)	0,0,(1)	SRR530638(1;1),
chr11	84864808	-	canonical	TATTG(A*)C	A	84864776	-32	expected	1	1	yes	no	yes	0,0,(1)	0,0,(1)	0,0,(1)	0,0,(1)	SRR530634(1;1),
chr11	85028474	-	canonical	TACTC(A*)T	A	85027861	-613	distal	1	1	yes	no	yes	1,0,(0)	1,0,(0)	1,0,(0)	1,0,(0)	SRR530634(1;1),
chr11	86509220	-	canonical	TGCTA(A*)C	A	86509192	-28	expected	2	1	no	no	yes	2,0,(0)	1,0,(0)	0,0,(0)	0,0,(0)	SRR530637(2;1),
chr11	96635844	-	canonical	TGCTA(A*)C	A	96635809	-35	expected	1	1	yes	no	yes	0,0,(1)	0,0,(1)	0,0,(1)	0,0,(1)	SRR530637(1;1),
chr11	96803867	-	canonical	CGCTG(A*)C	A	96803848	-19	expected	1	1	no	no	yes	1,0,(0)	1,0,(0)	0,0,(0)	0,0,(0)	SRR530635(1;1),
chr11	97901852	-	canonical	CACTG(A*)C	A	97901833	-19	expected	1	1	no	no	yes	1,0,(0)	1,0,(0)	0,0,(0)	0,0,(0)	SRR530640(1;1),
chr11	98856714	-	canonical	GACTG(A*)C	A	98856692	-22	expected	2	2	no	yes	yes	2,0,(0)	2,0,(0)	0,0,(0)	0,0,(0)	SRR530634(1;1),SRR530635(1;1),
chr11	98857307	-	canonical	TGCTT(A*)T	A	98857287	-20	expected	3	2	yes	yes	yes	0,1,(2)	0,1,(1)	0,0,(2)	0,0,(1)	SRR530636(2;1),SRR530633(1;1),
chr11	99086487	-	canonical	TTCTC(A*)T	A	99086456	-31	expected	1	1	yes	no	yes	0,0,(1)	0,0,(1)	0,0,(1)	0,0,(1)	SRR530633(1;1),
chr11	100374339	-	canonical	TAGTC(A*)C	A	100374307	-32	expected	1	1	yes	no	yes	0,0,(1)	0,0,(1)	0,0,(1)	0,0,(1)	SRR530633(1;1),
chr11	100629917	-	canonical	GGTTG(A*)C	A	100629891	-26	expected	2	2	yes	no	yes	0,0,(2)	0,0,(2)	0,0,(2)	0,0,(2)	SRR530636(2;2),
chr11	102328437	-	canonical	GGCTG(A*)T	A	102328417	-20	expected	1	1	no	no	yes	1,0,(0)	1,0,(0)	0,0,(0)	0,0,(0)	SRR530636(1;1),
chr11	102721458	-	canonical	GGCTC(A*)C	A	102721440	-18	expected	1	1	yes	no	yes	0,0,(1)	0,0,(1)	0,0,(1)	0,0,(1)	SRR530635(1;1),
chr11	102856504	-	canonical	TGGTC(A*)C	A	102856486	-18	expected	1	1	yes	no	yes	0,0,(1)	0,0,(1)	0,0,(1)	0,0,(1)	SRR530637(1;1),
chr11	106126380	-	canonical	GGCTG(A*)T	A	106126351	-29	expected	5	4	yes	yes	yes	3,0,(2)	2,0,(2)	0,0,(2)	0,0,(2)	SRR530634(2;1),SRR530635(1;1),SRR530633(1;1),SRR530638(1;1),
chr11	106916666	-	canonical	TTTTC(A*)C	A	106916632	-34	expected	2	2	yes	yes	yes	0,0,(2)	0,0,(2)	0,0,(2)	0,0,(2)	SRR530636(1;1),SRR530635(1;1),
chr11	106927047	-	canonical	TTCTG(A*)T	A	106927024	-23	expected	1	1	yes	no	yes	0,0,(1)	0,0,(1)	0,0,(1)	0,0,(1)	SRR530636(1;1),
chr11	115132419	-	canonical	CACTC(A*)T	A	115131744	-675	distal	1	1	yes	no	yes	1,0,(0)	1,0,(0)	1,0,(0)	1,0,(0)	SRR530638(1;1),
chr11	117683525	-	canonical	TGCTC(A*)T	A	117683504	-21	expected	2	2	yes	yes	yes	0,0,(2)	0,0,(2)	0,0,(2)	0,0,(2)	SRR530635(1;1),SRR530637(1;1),
chr11	120456487	-	canonical	AGCTC(A*)C	A	120456468	-19	expected	1	1	yes	no	yes	0,0,(1)	0,0,(1)	0,0,(1)	0,0,(1)	SRR530635(1;1),
chr11	120457398	-	canonical	TGCTA(A*)T	A	120457381	-17	expected	2	2	yes	no	yes	0,0,(2)	0,0,(2)	0,0,(2)	0,0,(2)	SRR530635(2;2),
chr11	120572811	-	canonical	AGCTC(A*)C	A	120572792	-19	expected	1	1	yes	no	yes	0,0,(1)	0,0,(1)	0,0,(1)	0,0,(1)	SRR530636(1;1),
chr11	120651065	-	canonical	AGCTC(A*)T	A	120651046	-19	expected	6	4	yes	yes	yes	0,0,(6)	0,0,(4)	0,0,(6)	0,0,(4)	SRR530633(1;1),SRR530635(1;1),SRR530636(4;2),
chr11	120656353	-	canonical	GGCTG(A*)C	A	120656325	-28	expected	1	1	yes	no	yes	0,0,(1)	0,0,(1)	0,0,(1)	0,0,(1)	SRR530635(1;1),
chr11	120671610	-	canonical	GACTG(A*)C	A	120671595	-15	expected	1	1	yes	no	yes	0,0,(1)	0,0,(1)	0,0,(1)	0,0,(1)	SRR530637(1;1),
chr11	120676802	-	canonical	TGCTG(A*)C	A	120676784	-18	expected	1	1	yes	no	yes	0,0,(1)	0,0,(1)	0,0,(1)	0,0,(1)	SRR530635(1;1),
chr11	120756074	-	canonical	TGCCC(A*)C	A	120756047	-27	expected	1	1	yes	no	yes	0,0,(1)	0,0,(1)	0,0,(1)	0,0,(1)	SRR530635(1;1),
chr11	3134438	+	canonical	TGTTC(A*)C	A	3134464	-26	expected	1	1	yes	no	yes	0,0,(1)	0,0,(1)	0,0,(1)	0,0,(1)	SRR530637(1;1),
chr11	4077394	+	canonical	GGCTT(A*)T	A	4077415	-21	expected	1	1	yes	no	yes	0,0,(1)	0,0,(1)	0,0,(1)	0,0,(1)	SRR530637(1;1),
chr11	4078046	+	canonical	TACTC(A*)C	A	4078073	-27	expected	1	1	no	no	yes	0,0,(1)	0,0,(1)	0,0,(0)	0,0,(0)	SRR530636(1;1),
chr11	5424655	+	canonical	TTCTA(A*)T	A	5424687	-32	expected	3	3	yes	yes	yes	0,2,(1)	0,2,(1)	0,0,(1)	0,0,(1)	SRR530638(1;1),SRR530636(2;2),
chr11	6299482	+	canonical	AACTC(A*)T	A	6299506	-24	expected	3	3	yes	yes	yes	0,0,(3)	0,0,(3)	0,0,(2)	0,0,(2)	SRR530634(1;1),SRR530637(2;2),
chr11	6304972	+	canonical	TGCTA(A*)T	A	6304992	-20	expected	1	1	yes	no	yes	0,0,(1)	0,0,(1)	0,0,(1)	0,0,(1)	SRR530636(1;1),
chr11	23181306	+	canonical	TGCAG(A*)T	A	23182528	-1222	distal	1	1	no	no	yes	0,0,(1)	0,0,(1)	0,0,(0)	0,0,(0)	SRR530638(1;1),
chr11	23371444	+	canonical	TGATT(A*)T	A	23371481	-37	expected	1	1	no	no	yes	0,0,(1)	0,0,(1)	0,0,(0)	0,0,(0)	SRR530634(1;1),
chr11	30707659	+	canonical	TACTT(A*)T	A	30707702	-43	expected	1	1	yes	no	yes	0,0,(1)	0,0,(1)	0,0,(1)	0,0,(1)	SRR530640(1;1),
chr11	32642439	+	canonical	TGTTA(A*)C	A	32642458	-19	expected	1	1	yes	no	yes	0,1,(0)	0,1,(0)	0,1,(0)	0,1,(0)	SRR530634(1;1),
chr11	45697813	+	canonical	TGCTT(A*)A	A	45697833	-20	expected	1	1	yes	no	yes	0,0,(1)	0,0,(1)	0,0,(1)	0,0,(1)	SRR530636(1;1),
chr11	54302750	+	canonical	GACTG(A*)C	A	54302770	-20	expected	1	1	yes	no	yes	0,0,(1)	0,0,(1)	0,0,(1)	0,0,(1)	SRR530636(1;1),
chr11	57864253	+	canonical	TGCTG(A*)C	A	57864284	-31	expected	1	1	no	no	yes	1,0,(0)	1,0,(0)	0,0,(0)	0,0,(0)	SRR530634(1;1),
chr11	59268785	+	canonical	GGCTT(A*)C	A	59268808	-23	expected	4	4	yes	yes	yes	0,0,(4)	0,0,(4)	0,0,(4)	0,0,(4)	SRR530636(3;3),SRR530639(1;1),
chr11	60011507	+	canonical	TGATA(A*)C	A	60011532	-25	expected	1	1	yes	no	yes	0,0,(1)	0,0,(1)	0,0,(1)	0,0,(1)	SRR530636(1;1),
chr11	60756624	+	canonical	TGCCT(A*)C	A	60756652	-28	expected	2	1	yes	no	yes	0,0,(2)	0,0,(1)	0,0,(2)	0,0,(1)	SRR530634(2;1),
chr11	62417080	+	canonical	TTTTA(A*)C	A	62417098	-18	expected	2	2	no	no	yes	0,0,(2)	0,0,(2)	0,0,(0)	0,0,(0)	SRR530636(2;2),
chr11	64813363	+	canonical	TGCCC(A*)C	A	64813797	-434	distal	1	1	yes	no	yes	0,0,(1)	0,0,(1)	0,0,(1)	0,0,(1)	SRR530634(1;1),
chr11	68835870	+	canonical	TCTTC(A*)C	A	68835878	-8	proximal	1	1	yes	no	yes	0,0,(1)	0,0,(1)	0,0,(1)	0,0,(1)	SRR530639(1;1),
chr11	69466064	+	canonical	TACTC(A*)T	A	69466105	-41	expected	2	2	yes	yes	yes	0,0,(2)	0,0,(2)	0,0,(1)	0,0,(1)	SRR530638(1;1),SRR530635(1;1),
chr11	69724919	+	canonical	AGCTC(A*)C	A	69724945	-26	expected	2	2	yes	no	yes	0,0,(2)	0,0,(2)	0,0,(2)	0,0,(2)	SRR530634(2;2),
chr11	70420824	+	canonical	TCCTG(A*)T	A	70420843	-19	expected	1	1	no	no	yes	1,0,(0)	1,0,(0)	0,0,(0)	0,0,(0)	SRR530634(1;1),
chr11	72258157	+	canonical	TGATA(A*)C	A	72258183	-26	expected	1	1	yes	no	yes	0,0,(1)	0,0,(1)	0,0,(1)	0,0,(1)	SRR530637(1;1),
chr11	72545728	+	canonical	TTCTG(A*)T	A	72545749	-21	expected	2	1	yes	no	yes	0,0,(2)	0,0,(1)	0,0,(2)	0,0,(1)	SRR530636(2;1),
chr11	72563872	+	canonical	TGGTA(A*)T	A	72563902	-30	expected	1	1	no	no	yes	1,0,(0)	1,0,(0)	0,0,(0)	0,0,(0)	SRR530636(1;1),
chr11	72720287	+	canonical	TACTA(A*)C	A	72720333	-46	expected	1	1	yes	no	yes	0,0,(1)	0,0,(1)	0,0,(1)	0,0,(1)	SRR530636(1;1),
chr11	74470644	+	canonical	TTCTT(A*)C	A	74470669	-25	expected	2	2	yes	no	yes	0,0,(2)	0,0,(2)	0,0,(2)	0,0,(2)	SRR530633(2;2),
chr11	75416867	+	canonical	TGTTC(A*)C	A	75416890	-23	expected	1	1	yes	no	yes	0,0,(1)	0,0,(1)	0,0,(1)	0,0,(1)	SRR530637(1;1),
chr11	75461123	+	canonical	TGTTC(A*)C	A	75461153	-30	expected	1	1	yes	no	yes	0,0,(1)	0,0,(1)	0,0,(1)	0,0,(1)	SRR530636(1;1),
chr11	75482481	+	canonical	TGTAG(A*)C	A	75482509	-28	expected	1	1	yes	no	yes	0,0,(1)	0,0,(1)	0,0,(1)	0,0,(1)	SRR530637(1;1),
chr11	77655941	+	canonical	GGCTG(A*)C	A	77655958	-17	expected	1	1	no	no	yes	1,0,(0)	1,0,(0)	0,0,(0)	0,0,(0)	SRR530636(1;1),
chr11	78099986	+	canonical	TCCTT(A*)C	A	78100014	-28	expected	1	1	yes	no	yes	0,0,(1)	0,0,(1)	0,0,(1)	0,0,(1)	SRR530636(1;1),
chr11	78115377	+	canonical	TCCTC(A*)C	A	78115396	-19	expected	1	1	yes	no	yes	0,0,(1)	0,0,(1)	0,0,(1)	0,0,(1)	SRR530636(1;1),
chr11	78128483	+	canonical	TGCAG(A*)T	A	78128689	-206	distal	1	1	no	no	yes	0,1,(0)	0,1,(0)	0,0,(0)	0,0,(0)	SRR530637(1;1),
chr11	79362148	+	canonical	TTTTC(A*)T	A	79362175	-27	expected	4	3	yes	no	yes	0,0,(4)	0,0,(3)	0,0,(3)	0,0,(2)	SRR530635(4;3),
chr11	79842619	+	canonical	TACAC(A*)T	A	79842649	-30	expected	1	1	no	no	yes	0,0,(1)	0,0,(1)	0,0,(0)	0,0,(0)	SRR530634(1;1),
chr11	79934161	+	canonical	TATTA(A*)T	A	79934183	-22	expected	2	2	yes	yes	yes	0,1,(1)	0,1,(1)	0,0,(1)	0,0,(1)	SRR530634(1;1),SRR530639(1;1),
chr11	82608842	+	canonical	TCTTT(A*)C	A	82608866	-24	expected	1	1	yes	no	yes	0,0,(1)	0,0,(1)	0,0,(1)	0,0,(1)	SRR530637(1;1),
chr11	84714818	+	canonical	AGCTC(A*)C	A	84714852	-34	expected	2	2	yes	yes	yes	0,0,(2)	0,0,(2)	0,0,(2)	0,0,(2)	SRR530634(1;1),SRR530633(1;1),
chr11	87416866	+	canonical	TGTAT(A*)C	A	87416889	-23	expected	1	1	yes	no	yes	1,0,(0)	1,0,(0)	1,0,(0)	1,0,(0)	SRR530636(1;1),
chr11	87417902	+	canonical	TGCTT(A*)G	A	87417919	-17	expected	2	2	no	yes	yes	1,1,(0)	1,1,(0)	0,0,(0)	0,0,(0)	SRR530637(1;1),SRR530636(1;1),
chr11	90501668	+	canonical	TGTTT(A*)C	A	90501690	-22	expected	1	1	no	no	yes	0,0,(1)	0,0,(1)	0,0,(0)	0,0,(0)	SRR530637(1;1),
chr11	95896610	+	canonical	AACTC(A*)T	A	95896632	-22	expected	1	1	no	no	yes	0,0,(1)	0,0,(1)	0,0,(0)	0,0,(0)	SRR530637(1;1),
chr11	96893374	+	canonical	TGTGG(A*)C	A	96893402	-28	expected	2	2	yes	no	yes	0,0,(2)	0,0,(2)	0,0,(2)	0,0,(2)	SRR530637(2;2),
chr11	98671936	+	canonical	TGATG(A*)T	A	98672211	-275	distal	1	1	no	no	yes	0,0,(1)	0,0,(1)	0,0,(0)	0,0,(0)	SRR530636(1;1),
chr11	98692832	+	canonical	TGATA(A*)C	A	98692856	-24	expected	1	1	yes	no	yes	0,0,(1)	0,0,(1)	0,0,(1)	0,0,(1)	SRR530637(1;1),
chr11	100981822	+	canonical	GACTC(A*)C	A	100981860	-38	expected	1	1	yes	no	yes	0,0,(1)	0,0,(1)	0,0,(1)	0,0,(1)	SRR530633(1;1),
chr11	101181501	+	canonical	TACAT(A*)T	A	101181524	-23	expected	1	1	yes	no	yes	1,0,(0)	1,0,(0)	1,0,(0)	1,0,(0)	SRR530637(1;1),
chr11	101415269	+	canonical	TTTTT(A*)C	A	101415301	-32	expected	1	1	yes	no	yes	0,0,(1)	0,0,(1)	0,0,(1)	0,0,(1)	SRR530636(1;1),
chr11	101616018	+	canonical	AGCTC(A*)C	A	101616045	-27	expected	1	1	yes	no	yes	0,0,(1)	0,0,(1)	0,0,(1)	0,0,(1)	SRR530634(1;1),
chr11	105110768	+	canonical	TATTT(A*)C	A	105110798	-30	expected	1	1	yes	no	yes	0,0,(1)	0,0,(1)	0,0,(1)	0,0,(1)	SRR530633(1;1),
chr11	109522326	+	canonical	TGTTA(A*)T	A	109522348	-22	expected	1	1	yes	no	yes	0,0,(1)	0,0,(1)	0,0,(1)	0,0,(1)	SRR530638(1;1),
chr11	113513519	+	canonical	TGTTG(A*)T	A	113513538	-19	expected	1	1	yes	no	yes	0,0,(1)	0,0,(1)	0,0,(1)	0,0,(1)	SRR530635(1;1),
chr11	115715006	+	canonical	GACTC(A*)T	A	115715030	-24	expected	2	2	yes	no	yes	0,0,(2)	0,0,(2)	0,0,(2)	0,0,(2)	SRR530636(2;2),
chr11	117217621	+	canonical	GGCTG(A*)T	A	117217648	-27	expected	1	1	no	no	yes	1,0,(0)	1,0,(0)	0,0,(0)	0,0,(0)	SRR530635(1;1),
chr11	119114911	+	canonical	TCCTC(A*)C	A	119114933	-22	expected	1	1	no	no	yes	0,1,(0)	0,1,(0)	0,0,(0)	0,0,(0)	SRR530639(1;1),
chr11	119363988	+	canonical	TGCCC(A*)T	A	119364012	-24	expected	1	1	no	no	yes	0,1,(0)	0,1,(0)	0,0,(0)	0,0,(0)	SRR530635(1;1),
chr11	121458541	+	canonical	AGCTC(A*)C	A	121458565	-24	expected	1	1	yes	no	yes	0,0,(1)	0,0,(1)	0,0,(1)	0,0,(1)	SRR530636(1;1),
chr12	4872697	-	canonical	GGCTG(A*)T	A	4872677	-20	expected	1	1	yes	no	yes	0,0,(1)	0,0,(1)	0,0,(1)	0,0,(1)	SRR530636(1;1),
chr12	29316080	-	canonical	TAGTG(A*)T	A	29316058	-22	expected	1	1	yes	no	yes	0,0,(1)	0,0,(1)	0,0,(1)	0,0,(1)	SRR530637(1;1),
chr12	29388496	-	canonical	CACTT(A*)C	A	29388463	-33	expected	1	1	yes	no	yes	1,0,(0)	1,0,(0)	1,0,(0)	1,0,(0)	SRR530638(1;1),
chr12	32315784	-	canonical	TGCTC(A*)T	A	32315758	-26	expected	1	1	yes	no	yes	0,0,(1)	0,0,(1)	0,0,(1)	0,0,(1)	SRR530637(1;1),
chr12	52847360	-	canonical	TAGTA(A*)T	A	52847338	-22	expected	1	1	no	no	yes	0,1,(0)	0,1,(0)	0,0,(0)	0,0,(0)	SRR530634(1;1),
chr12	56393584	-	canonical	TATTT(A*)C	A	56393561	-23	expected	1	1	yes	no	yes	0,0,(1)	0,0,(1)	0,0,(1)	0,0,(1)	SRR530638(1;1),
chr12	56591869	-	canonical	TAGTT(A*)C	A	56591846	-23	expected	3	3	yes	no	yes	0,0,(3)	0,0,(3)	0,0,(1)	0,0,(1)	SRR530637(3;3),
chr12	56592346	-	canonical	GGCTT(A*)T	A	56592317	-29	expected	5	5	yes	yes	yes	0,1,(4)	0,1,(4)	0,0,(4)	0,0,(4)	SRR530638(2;2),SRR530637(3;3),
chr12	70259933	-	canonical	TGTTG(G*)T	G	70259747	-186	distal	1	1	no	no	yes	0,1,(0)	0,1,(0)	0,0,(0)	0,0,(0)	SRR530635(1;1),
chr12	77723304	-	canonical	TCCTC(A*)T	A	77723280	-24	expected	3	2	yes	no	yes	0,0,(3)	0,0,(2)	0,0,(3)	0,0,(2)	SRR530636(3;2),
chr12	77728138	-	canonical	TTCTG(A*)T	A	77728122	-16	expected	3	2	yes	yes	yes	2,0,(1)	1,0,(1)	0,0,(1)	0,0,(1)	SRR530636(1;1),SRR530634(2;1),
chr12	81272884	-	canonical	TTCTG(A*)T	A	81272862	-22	expected	1	1	yes	no	yes	0,0,(1)	0,0,(1)	0,0,(1)	0,0,(1)	SRR530639(1;1),
chr12	81738332	-	canonical	TGCTA(G*)C	G	81735514	-2818	distal	1	1	yes	no	yes	0,0,(1)	0,0,(1)	0,0,(1)	0,0,(1)	SRR530634(1;1),
chr12	86642900	-	canonical	AGCTA(A*)T	A	86642876	-24	expected	1	1	yes	no	yes	0,0,(1)	0,0,(1)	0,0,(1)	0,0,(1)	SRR530634(1;1),
chr12	93071689	-	canonical	TGTTC(A*)T	A	93071662	-27	expected	1	1	yes	no	yes	0,0,(1)	0,0,(1)	0,0,(1)	0,0,(1)	SRR530636(1;1),
chr12	103083416	-	canonical	TATTG(A*)T	A	103083384	-32	expected	1	1	no	no	yes	1,0,(0)	1,0,(0)	0,0,(0)	0,0,(0)	SRR530637(1;1),
chr12	103133948	-	canonical	TAATT(A*)T	A	103133926	-22	expected	2	2	yes	no	yes	0,0,(2)	0,0,(2)	0,0,(2)	0,0,(2)	SRR530637(2;2),
chr12	103184132	-	canonical	TTTTG(A*)C	A	103184129	-3	proximal	1	1	no	no	yes	0,1,(0)	0,1,(0)	0,0,(0)	0,0,(0)	SRR530635(1;1),
chr12	104648300	-	canonical	TCTTG(A*)T	A	104648267	-33	expected	1	1	no	no	yes	0,0,(1)	0,0,(1)	0,0,(0)	0,0,(0)	SRR530635(1;1),
chr12	106887876	-	canonical	CACTG(A*)C	A	106887842	-34	expected	2	2	yes	yes	yes	0,0,(2)	0,0,(2)	0,0,(1)	0,0,(1)	SRR530634(1;1),SRR530640(1;1),
chr12	113893463	-	canonical	TAGTA(A*)C	A	113893440	-23	expected	2	2	yes	no	yes	0,0,(2)	0,0,(2)	0,0,(2)	0,0,(2)	SRR530636(2;2),
chr12	113900538	-	canonical	TCCTT(A*)T	A	113900519	-19	expected	2	2	no	no	yes	0,2,(0)	0,2,(0)	0,0,(0)	0,0,(0)	SRR530637(2;2),
chr12	114207715	-	canonical	TCCTT(A*)C	A	114207692	-23	expected	4	4	yes	yes	yes	0,2,(2)	0,2,(2)	0,0,(2)	0,0,(2)	SRR530638(1;1),SRR530635(3;3),
chr12	114659491	-	canonical	TCCTC(A*)C	A	114659472	-19	expected	8	7	yes	yes	yes	2,0,(6)	2,0,(5)	0,0,(6)	0,0,(5)	SRR530637(8;7),
chr12	114660536	-	canonical	AGCTC(A*)C	A	114660515	-21	expected	2	2	yes	no	yes	0,0,(2)	0,0,(2)	0,0,(2)	0,0,(2)	SRR530637(2;2),
chr12	3897542	+	canonical	TCCTA(A*)T	A	3897564	-22	expected	2	2	yes	no	yes	0,0,(2)	0,0,(2)	0,0,(2)	0,0,(2)	SRR530633(2;2),
chr12	16982813	+	canonical	TACTT(A*)T	A	16982839	-26	expected	1	1	yes	no	yes	0,0,(1)	0,0,(1)	0,0,(1)	0,0,(1)	SRR530637(1;1),
chr12	25394168	+	canonical	TGCTA(A*)T	A	25394189	-21	expected	1	1	no	no	yes	1,0,(0)	1,0,(0)	0,0,(0)	0,0,(0)	SRR530634(1;1),
chr12	34122531	+	canonical	TGTTA(A*)T	A	34122557	-26	expected	1	1	yes	no	yes	0,0,(1)	0,0,(1)	0,0,(1)	0,0,(1)	SRR530635(1;1),
chr12	52464136	+	canonical	CACTA(A*)C	A	52464172	-36	expected	1	1	yes	no	yes	0,0,(1)	0,0,(1)	0,0,(1)	0,0,(1)	SRR530634(1;1),
chr12	60170075	+	canonical	TGCAC(A*)C	A	60170102	-27	expected	1	1	yes	no	yes	0,0,(1)	0,0,(1)	0,0,(1)	0,0,(1)	SRR530634(1;1),
chr12	60248816	+	canonical	TACTT(A*)C	A	60248838	-22	expected	2	2	yes	yes	yes	0,0,(2)	0,0,(2)	0,0,(2)	0,0,(2)	SRR530634(1;1),SRR530635(1;1),
chr12	78011169	+	canonical	GGCTC(A*)T	A	78011197	-28	expected	1	1	yes	no	yes	0,0,(1)	0,0,(1)	0,0,(1)	0,0,(1)	SRR530640(1;1),
chr12	86562399	+	canonical	TTTTC(A*)C	A	86562426	-27	expected	1	1	yes	no	yes	0,0,(1)	0,0,(1)	0,0,(1)	0,0,(1)	SRR530635(1;1),
chr12	86564310	+	canonical	AGCTC(A*)T	A	86564330	-20	expected	1	1	yes	no	yes	0,0,(1)	0,0,(1)	0,0,(1)	0,0,(1)	SRR530634(1;1),
chr12	88302701	+	canonical	TGTGG(A*)T	A	88302729	-28	expected	1	1	yes	no	yes	0,0,(1)	0,0,(1)	0,0,(1)	0,0,(1)	SRR530637(1;1),
chr12	88612266	+	canonical	AACTA(A*)C	A	88612288	-22	expected	1	1	yes	no	yes	0,0,(1)	0,0,(1)	0,0,(1)	0,0,(1)	SRR530636(1;1),
chr12	100013049	+	canonical	TACTT(A*)T	A	100017317	-4268	distal	1	1	yes	no	yes	0,0,(1)	0,0,(1)	0,0,(1)	0,0,(1)	SRR530638(1;1),
chr12	101358178	+	canonical	TCTTC(A*)T	A	101358196	-18	expected	2	2	no	no	yes	2,0,(0)	2,0,(0)	0,0,(0)	0,0,(0)	SRR530637(2;2),
chr12	107309750	+	canonical	TGCTT(C*)C	C	107309779	-29	expected	1	1	no	no	yes	0,0,(1)	0,0,(1)	0,0,(0)	0,0,(0)	SRR530635(1;1),
chr12	109420365	+	canonical	TACTA(A*)C	A	109420386	-21	expected	1	1	yes	no	yes	0,0,(1)	0,0,(1)	0,0,(1)	0,0,(1)	SRR530640(1;1),
chr12	111892973	+	canonical	TGCTT(A*)G	A	111892993	-20	expected	1	1	yes	no	yes	0,0,(1)	0,0,(1)	0,0,(1)	0,0,(1)	SRR530636(1;1),
chr12	111897627	+	canonical	TGGTG(A*)C	A	111897650	-23	expected	1	1	yes	no	yes	0,0,(1)	0,0,(1)	0,0,(1)	0,0,(1)	SRR530635(1;1),
chr12	112689228	+	canonical	GGCTC(A*)C	A	112689253	-25	expected	1	1	yes	no	yes	0,0,(1)	0,0,(1)	0,0,(1)	0,0,(1)	SRR530633(1;1),
chr12	112866006	+	canonical	TGCTG(A*)C	A	112866025	-19	expected	4	3	no	yes	yes	4,0,(0)	3,0,(0)	0,0,(0)	0,0,(0)	SRR530634(1;1),SRR530636(2;1),SRR530635(1;1),
chr12	113850730	+	canonical	AGCTG(A*)T	A	113850758	-28	expected	4	3	yes	yes	yes	2,0,(2)	1,0,(2)	0,0,(1)	0,0,(1)	SRR530634(3;2),SRR530638(1;1),
chr12	117645639	+	canonical	TGCAC(A*)T	A	117645670	-31	expected	1	1	no	no	yes	1,0,(0)	1,0,(0)	0,0,(0)	0,0,(0)	SRR530636(1;1),
chr12	119115913	+	canonical	TCCTA(A*)C	A	119115939	-26	expected	1	1	yes	no	yes	0,0,(1)	0,0,(1)	0,0,(1)	0,0,(1)	SRR530635(1;1),
chr13	6618548	-	canonical	TATTT(A*)T	A	6618529	-19	expected	2	2	yes	yes	yes	0,0,(2)	0,0,(2)	0,0,(2)	0,0,(2)	SRR530634(1;1),SRR530637(1;1),
chr13	12304775	-	canonical	TGCTC(A*)C	A	12304755	-20	expected	2	1	yes	no	yes	0,0,(2)	0,0,(1)	0,0,(2)	0,0,(1)	SRR530636(2;1),
chr13	14703029	-	canonical	TATTA(A*)T	A	14703007	-22	expected	1	1	yes	no	yes	0,0,(1)	0,0,(1)	0,0,(1)	0,0,(1)	SRR530635(1;1),
chr13	21541415	-	canonical	TACTA(G*)C	G	21541385	-30	expected	1	1	yes	no	yes	0,1,(0)	0,1,(0)	0,1,(0)	0,1,(0)	SRR530638(1;1),
chr13	23460101	-	canonical	TGCTC(A*)T	A	23460074	-27	expected	1	1	yes	no	yes	0,0,(1)	0,0,(1)	0,0,(1)	0,0,(1)	SRR530637(1;1),
chr13	48916004	-	canonical	TAGTC(A*)C	A	48915982	-22	expected	1	1	yes	no	yes	0,0,(1)	0,0,(1)	0,0,(1)	0,0,(1)	SRR530636(1;1),
chr13	48984663	-	canonical	TTCTC(A*)T	A	48984630	-33	expected	1	1	yes	no	yes	0,0,(1)	0,0,(1)	0,0,(1)	0,0,(1)	SRR530640(1;1),
chr13	55613801	-	canonical	TGCAG(A*)C	A	55613779	-22	expected	2	2	no	yes	yes	2,0,(0)	2,0,(0)	0,0,(0)	0,0,(0)	SRR530638(1;1),SRR530636(1;1),
chr13	56205889	-	canonical	GGCTT(A*)C	A	56205860	-29	expected	1	1	yes	no	yes	0,0,(1)	0,0,(1)	0,0,(1)	0,0,(1)	SRR530633(1;1),
chr13	58337969	-	canonical	TACTG(A*)T	A	58337955	-14	expected	1	1	yes	no	yes	0,0,(1)	0,0,(1)	0,0,(1)	0,0,(1)	SRR530635(1;1),
chr13	63643648	-	canonical	TGCTG(A*)C	A	63643620	-28	expected	1	1	no	no	yes	1,0,(0)	1,0,(0)	0,0,(0)	0,0,(0)	SRR530639(1;1),
chr13	64321280	-	canonical	TGTTC(A*)T	A	64321256	-24	expected	1	1	no	no	yes	0,0,(1)	0,0,(1)	0,0,(0)	0,0,(0)	SRR530634(1;1),
chr13	93918435	-	canonical	TATTC(A*)T	A	93917620	-815	distal	1	1	yes	no	yes	0,0,(1)	0,0,(1)	0,0,(1)	0,0,(1)	SRR530635(1;1),
chr13	97953781	-	canonical	TGCAC(A*)T	A	97953761	-20	expected	1	1	yes	no	yes	1,0,(0)	1,0,(0)	1,0,(0)	1,0,(0)	SRR530637(1;1),
chr13	99083269	-	canonical	TACTT(A*)C	A	99083248	-21	expected	2	1	yes	no	yes	0,0,(2)	0,0,(1)	0,0,(2)	0,0,(1)	SRR530636(2;1),
chr13	100823092	-	canonical	CACTC(A*)C	A	100823073	-19	expected	1	1	no	no	yes	0,0,(1)	0,0,(1)	0,0,(0)	0,0,(0)	SRR530638(1;1),
chr13	100844519	-	canonical	TCCTG(A*)T	A	100844500	-19	expected	1	1	yes	no	yes	0,0,(1)	0,0,(1)	0,0,(1)	0,0,(1)	SRR530634(1;1),
chr13	102471501	-	canonical	TTCTC(A*)C	A	102471481	-20	expected	1	1	yes	no	yes	0,0,(1)	0,0,(1)	0,0,(1)	0,0,(1)	SRR530635(1;1),
chr13	107715249	-	canonical	TGCTA(A*)C	A	107715236	-13	expected	1	1	yes	no	yes	0,1,(0)	0,1,(0)	0,1,(0)	0,1,(0)	SRR530637(1;1),
chr13	113707934	-	canonical	TTCTC(A*)T	A	113707909	-25	expected	1	1	yes	no	yes	0,0,(1)	0,0,(1)	0,0,(1)	0,0,(1)	SRR530637(1;1),
chr13	3564085	+	canonical	TACTT(A*)T	A	3564104	-19	expected	1	1	yes	no	yes	0,1,(0)	0,1,(0)	0,1,(0)	0,1,(0)	SRR530635(1;1),
chr13	6561164	+	canonical	TGATA(A*)C	A	6561198	-34	expected	1	1	yes	no	yes	0,0,(1)	0,0,(1)	0,0,(1)	0,0,(1)	SRR530635(1;1),
chr13	9136004	+	canonical	TACAT(A*)T	A	9136024	-20	expected	1	1	yes	no	yes	1,0,(0)	1,0,(0)	1,0,(0)	1,0,(0)	SRR530636(1;1),
chr13	9136374	+	canonical	TTCTA(A*)C	A	9136400	-26	expected	1	1	yes	no	yes	0,0,(1)	0,0,(1)	0,0,(1)	0,0,(1)	SRR530636(1;1),
chr13	14262435	+	canonical	TGCGG(A*)T	A	14273486	-11051	distal	1	1	no	no	yes	1,0,(0)	1,0,(0)	0,0,(0)	0,0,(0)	SRR530637(1;1),
chr13	34997729	+	canonical	TCCTT(A*)C	A	34997751	-22	expected	1	1	yes	no	yes	0,0,(1)	0,0,(1)	0,0,(1)	0,0,(1)	SRR530636(1;1),
chr13	43894948	+	canonical	TATTC(A*)C	A	43894970	-22	expected	2	2	yes	yes	yes	0,0,(2)	0,0,(2)	0,0,(2)	0,0,(2)	SRR530637(1;1),SRR530638(1;1),
chr13	49818329	+	canonical	AACTG(A*)C	A	49818361	-32	expected	2	2	no	no	yes	2,0,(0)	2,0,(0)	0,0,(0)	0,0,(0)	SRR530636(2;2),
chr13	55748951	+	canonical	TGCTG(A*)T	A	55748987	-36	expected	2	2	no	no	yes	2,0,(0)	2,0,(0)	0,0,(0)	0,0,(0)	SRR530640(2;2),
chr13	58261480	+	canonical	TGCTG(A*)C	A	58261512	-32	expected	1	1	yes	no	yes	0,0,(1)	0,0,(1)	0,0,(1)	0,0,(1)	SRR530636(1;1),
chr13	69751159	+	canonical	TGCTC(A*)C	A	69751178	-19	expected	104	86	yes	yes	yes	0,33,(71)	0,27,(59)	0,0,(65)	0,0,(55)	SRR530637(32;28),SRR530640(1;1),SRR530638(35;25),SRR530633(2;2),SRR530636(8;6),SRR530634(8;8),SRR530635(16;14),SRR530639(2;2),
chr13	73777406	+	canonical	TCCTC(A*)T	A	73777433	-27	expected	2	1	yes	no	yes	0,0,(2)	0,0,(1)	0,0,(2)	0,0,(1)	SRR530636(2;1),
chr13	91063904	+	canonical	TACTG(A*)C	A	91063930	-26	expected	2	2	no	yes	yes	2,0,(0)	2,0,(0)	0,0,(0)	0,0,(0)	SRR530640(1;1),SRR530633(1;1),
chr13	99042701	+	canonical	TATTT(A*)T	A	99042726	-25	expected	2	1	no	no	yes	0,0,(2)	0,0,(1)	0,0,(0)	0,0,(0)	SRR530636(2;1),
chr14	21306437	-	canonical	TGCTC(A*)T	A	21306402	-35	expected	2	2	yes	no	yes	0,0,(2)	0,0,(2)	0,0,(2)	0,0,(2)	SRR530636(2;2),
chr14	21579428	-	canonical	AACTC(A*)C	A	21579408	-20	expected	2	1	no	no	yes	0,0,(2)	0,0,(1)	0,0,(0)	0,0,(0)	SRR530636(2;1),
chr14	25274189	-	canonical	AGCTG(A*)T	A	25274170	-19	expected	2	2	yes	no	yes	0,0,(2)	0,0,(2)	0,0,(2)	0,0,(2)	SRR530636(2;2),
chr14	27234496	-	canonical	TACTG(A*)C	A	27234474	-22	expected	1	1	no	no	yes	1,0,(0)	1,0,(0)	0,0,(0)	0,0,(0)	SRR530638(1;1),
chr14	27249429	-	canonical	TACTA(A*)C	A	27249396	-33	expected	1	1	yes	no	yes	0,0,(1)	0,0,(1)	0,0,(1)	0,0,(1)	SRR530635(1;1),
chr14	31420656	-	canonical	GGCTG(A*)C	A	31420636	-20	expected	1	1	yes	no	yes	0,0,(1)	0,0,(1)	0,0,(1)	0,0,(1)	SRR530638(1;1),
chr14	33955644	-	canonical	TACTG(A*)T	A	33955618	-26	expected	1	1	no	no	yes	1,0,(0)	1,0,(0)	0,0,(0)	0,0,(0)	SRR530636(1;1),
chr14	51475404	-	canonical	CACTC(A*)C	A	51475374	-30	expected	1	1	yes	no	yes	0,0,(1)	0,0,(1)	0,0,(1)	0,0,(1)	SRR530637(1;1),
chr14	56246856	-	canonical	TGCTG(A*)T	A	56246830	-26	expected	2	2	yes	no	yes	0,0,(2)	0,0,(2)	0,0,(2)	0,0,(2)	SRR530637(2;2),
chr14	56252636	-	canonical	TGATT(A*)C	A	56252614	-22	expected	1	1	yes	no	yes	0,1,(0)	0,1,(0)	0,1,(0)	0,1,(0)	SRR530637(1;1),
chr14	56299959	-	canonical	TCCTC(A*)C	A	56299926	-33	expected	1	1	yes	no	yes	0,0,(1)	0,0,(1)	0,0,(1)	0,0,(1)	SRR530636(1;1),
chr14	57316896	-	canonical	TATTG(A*)T	A	57316875	-21	expected	1	1	yes	no	yes	0,0,(1)	0,0,(1)	0,0,(1)	0,0,(1)	SRR530637(1;1),
chr14	64001597	-	canonical	GGCTC(A*)C	A	64001576	-21	expected	1	1	yes	no	yes	0,1,(0)	0,1,(0)	0,1,(0)	0,1,(0)	SRR530637(1;1),
chr14	66196652	-	canonical	TCCTC(A*)T	A	66184310	-12342	distal	2	2	yes	no	yes	0,0,(2)	0,0,(2)	0,0,(2)	0,0,(2)	SRR530635(2;2),
chr14	68333093	-	canonical	TTTTC(A*)C	A	68333062	-31	expected	3	3	yes	yes	yes	0,0,(3)	0,0,(3)	0,0,(3)	0,0,(3)	SRR530637(1;1),SRR530636(2;2),
chr14	69863495	-	canonical	TATTG(G*)T	G	69863411	-84	distal	1	1	no	no	yes	0,0,(1)	0,0,(1)	0,0,(0)	0,0,(0)	SRR530638(1;1),
chr14	70840122	-	canonical	TACTT(A*)T	A	70840086	-36	expected	1	1	yes	no	yes	0,0,(1)	0,0,(1)	0,0,(1)	0,0,(1)	SRR530637(1;1),
chr14	76107876	-	canonical	CACTA(A*)C	A	76107856	-20	expected	1	1	no	no	yes	0,0,(1)	0,0,(1)	0,0,(0)	0,0,(0)	SRR530636(1;1),
chr14	79002972	-	canonical	CACTT(A*)C	A	79002940	-32	expected	1	1	yes	no	yes	0,0,(1)	0,0,(1)	0,0,(1)	0,0,(1)	SRR530638(1;1),
chr14	103521865	-	canonical	CGCTC(A*)C	A	103521839	-26	expected	1	1	no	no	yes	0,0,(1)	0,0,(1)	0,0,(0)	0,0,(0)	SRR530638(1;1),
chr14	118899319	-	canonical	TGCTG(A*)C	A	118899293	-26	expected	1	1	no	no	yes	1,0,(0)	1,0,(0)	0,0,(0)	0,0,(0)	SRR530637(1;1),
chr14	8767055	+	canonical	CACTA(A*)C	A	8767077	-22	expected	1	1	yes	no	yes	0,1,(0)	0,1,(0)	0,1,(0)	0,1,(0)	SRR530638(1;1),
chr14	21512345	+	canonical	TAGTA(A*)T	A	21512365	-20	expected	1	1	yes	no	yes	0,0,(1)	0,0,(1)	0,0,(1)	0,0,(1)	SRR530634(1;1),
chr14	21512851	+	canonical	TCCTT(A*)C	A	21512872	-21	expected	1	1	yes	no	yes	0,0,(1)	0,0,(1)	0,0,(1)	0,0,(1)	SRR530636(1;1),
chr14	25314972	+	canonical	TGCTG(A*)C	A	25314996	-24	expected	1	1	no	no	yes	1,0,(0)	1,0,(0)	0,0,(0)	0,0,(0)	SRR530634(1;1),
chr14	26464081	+	canonical	TAATG(A*)C	A	26464141	-60	expected	1	1	yes	no	yes	0,0,(1)	0,0,(1)	0,0,(1)	0,0,(1)	SRR530634(1;1),
chr14	26469983	+	canonical	TGCTT(A*)C	A	26470010	-27	expected	1	1	yes	no	yes	0,0,(1)	0,0,(1)	0,0,(1)	0,0,(1)	SRR530636(1;1),
chr14	27448133	+	canonical	TACCA(A*)C	A	27448157	-24	expected	1	1	yes	no	yes	0,0,(1)	0,0,(1)	0,0,(1)	0,0,(1)	SRR530638(1;1),
chr14	28192744	+	canonical	TGCTG(A*)C	A	28192776	-32	expected	1	1	no	no	yes	1,0,(0)	1,0,(0)	0,0,(0)	0,0,(0)	SRR530636(1;1),
chr14	32067196	+	canonical	TATTT(A*)T	A	32067218	-22	expected	2	2	yes	no	yes	0,0,(2)	0,0,(2)	0,0,(2)	0,0,(2)	SRR530634(2;2),
chr14	32067723	+	canonical	TGCTG(A*)T	A	32067746	-23	expected	1	1	no	no	yes	1,0,(0)	1,0,(0)	0,0,(0)	0,0,(0)	SRR530639(1;1),
chr14	32990388	+	canonical	TGCTT(A*)C	A	32990418	-30	expected	1	1	no	no	yes	0,1,(0)	0,1,(0)	0,0,(0)	0,0,(0)	SRR530636(1;1),
chr14	33379946	+	canonical	TGCAG(A*)C	A	33379969	-23	expected	1	1	no	no	yes	1,0,(0)	1,0,(0)	0,0,(0)	0,0,(0)	SRR530638(1;1),
chr14	35490111	+	canonical	TGCTG(A*)T	A	35490139	-28	expected	2	2	yes	no	yes	0,0,(2)	0,0,(2)	0,0,(2)	0,0,(2)	SRR530636(2;2),
chr14	52509518	+	canonical	TGCTT(A*)T	A	52509537	-19	expected	2	2	yes	yes	yes	0,0,(2)	0,0,(2)	0,0,(2)	0,0,(2)	SRR530634(1;1),SRR530637(1;1),
chr14	56166852	+	canonical	TGCCC(A*)T	A	56166876	-24	expected	2	2	yes	yes	yes	0,0,(2)	0,0,(2)	0,0,(2)	0,0,(2)	SRR530636(1;1),SRR530638(1;1),
chr14	56186046	+	canonical	CACTC(A*)T	A	56186084	-38	expected	1	1	yes	no	yes	0,0,(1)	0,0,(1)	0,0,(1)	0,0,(1)	SRR530635(1;1),
chr14	56211275	+	canonical	TGGTG(A*)C	A	56211297	-22	expected	1	1	yes	no	yes	0,0,(1)	0,0,(1)	0,0,(1)	0,0,(1)	SRR530636(1;1),
chr14	73992416	+	canonical	TACTT(A*)T	A	73992438	-22	expected	1	1	yes	no	yes	0,0,(1)	0,0,(1)	0,0,(1)	0,0,(1)	SRR530637(1;1),
chr15	11324191	-	canonical	TGCAG(A*)T	A	11324169	-22	expected	2	2	yes	no	yes	2,0,(0)	2,0,(0)	1,0,(0)	1,0,(0)	SRR530636(2;2),
chr15	34888851	-	canonical	TACTC(A*)T	A	34888831	-20	expected	1	1	no	no	yes	0,0,(1)	0,0,(1)	0,0,(0)	0,0,(0)	SRR530636(1;1),
chr15	36528832	-	canonical	TAATG(A*)T	A	36528797	-35	expected	19	18	yes	yes	yes	3,3,(13)	3,3,(12)	2,3,(5)	2,3,(4)	SRR530637(4;4),SRR530638(3;3),SRR530633(3;3),SRR530636(3;2),SRR530635(6;6),
chr15	36530461	-	canonical	TCTTC(A*)T	A	36530443	-18	expected	9	9	yes	yes	yes	1,0,(8)	1,0,(8)	1,0,(6)	1,0,(6)	SRR530636(2;2),SRR530635(5;5),SRR530638(2;2),
chr15	37929776	-	canonical	TATAA(A*)T	A	37929759	-17	expected	1	1	yes	no	yes	1,0,(0)	1,0,(0)	1,0,(0)	1,0,(0)	SRR530636(1;1),
chr15	37948251	-	canonical	TATTT(A*)T	A	37948231	-20	expected	2	2	yes	no	yes	0,0,(2)	0,0,(2)	0,0,(2)	0,0,(2)	SRR530636(2;2),
chr15	43103886	-	canonical	TAATA(A*)C	A	43103864	-22	expected	1	1	no	no	yes	1,0,(0)	1,0,(0)	0,0,(0)	0,0,(0)	SRR530639(1;1),
chr15	58786792	-	canonical	TGATG(A*)C	A	58786768	-24	expected	1	1	yes	no	yes	0,0,(1)	0,0,(1)	0,0,(1)	0,0,(1)	SRR530636(1;1),
chr15	58788170	-	canonical	AGCTG(A*)C	A	58788145	-25	expected	3	2	no	no	yes	3,0,(0)	2,0,(0)	0,0,(0)	0,0,(0)	SRR530640(3;2),
chr15	75903033	-	canonical	TCCTG(A*)C	A	75902998	-35	expected	2	2	yes	yes	yes	0,1,(1)	0,1,(1)	0,0,(1)	0,0,(1)	SRR530636(2;2),
chr15	76337113	-	canonical	TGCTT(A*)C	A	76337083	-30	expected	1	1	no	no	yes	0,1,(0)	0,1,(0)	0,0,(0)	0,0,(0)	SRR530636(1;1),
chr15	76366419	-	canonical	AGCTC(A*)C	A	76366393	-26	expected	1	1	yes	no	yes	0,0,(1)	0,0,(1)	0,0,(1)	0,0,(1)	SRR530635(1;1),
chr15	77598114	-	canonical	TCCTC(A*)C	A	77598093	-21	expected	1	1	no	no	yes	0,0,(1)	0,0,(1)	0,0,(0)	0,0,(0)	SRR530634(1;1),
chr15	79136267	-	canonical	TGCTT(A*)T	A	79136241	-26	expected	1	1	no	no	yes	0,1,(0)	0,1,(0)	0,0,(0)	0,0,(0)	SRR530637(1;1),
chr15	79139303	-	canonical	TGCTT(A*)T	A	79139286	-17	expected	2	2	yes	no	yes	0,0,(2)	0,0,(2)	0,0,(2)	0,0,(2)	SRR530634(2;2),
chr15	81547152	-	canonical	TGCAC(A*)C	A	81547131	-21	expected	1	1	no	no	yes	0,0,(1)	0,0,(1)	0,0,(0)	0,0,(0)	SRR530636(1;1),
chr15	88518932	-	canonical	TTCTT(A*)T	A	88518910	-22	expected	1	1	yes	no	yes	0,0,(1)	0,0,(1)	0,0,(1)	0,0,(1)	SRR530635(1;1),
chr15	96520682	-	canonical	TACTG(A*)T	A	96520659	-23	expected	6	6	no	yes	yes	4,0,(2)	4,0,(2)	0,0,(0)	0,0,(0)	SRR530636(1;1),SRR530634(1;1),SRR530635(2;2),SRR530637(2;2),
chr15	97584374	-	canonical	AGCTC(A*)T	A	97584354	-20	expected	1	1	yes	no	yes	0,0,(1)	0,0,(1)	0,0,(1)	0,0,(1)	SRR530640(1;1),
chr15	98480353	-	canonical	AGCTT(A*)T	A	98480323	-30	expected	1	1	no	no	yes	0,0,(1)	0,0,(1)	0,0,(0)	0,0,(0)	SRR530636(1;1),
chr15	98482508	-	canonical	TGTTA(A*)C	A	98482487	-21	expected	1	1	yes	no	yes	0,0,(1)	0,0,(1)	0,0,(1)	0,0,(1)	SRR530633(1;1),
chr15	98665444	-	canonical	TGCTA(A*)C	A	98665412	-32	expected	1	1	yes	no	yes	0,0,(1)	0,0,(1)	0,0,(1)	0,0,(1)	SRR530636(1;1),
chr15	98671348	-	canonical	TGCTC(A*)C	A	98671325	-23	expected	2	2	yes	yes	yes	0,0,(2)	0,0,(2)	0,0,(2)	0,0,(2)	SRR530636(1;1),SRR530637(1;1),
chr15	98677685	-	canonical	CACTG(A*)C	A	98677653	-32	expected	3	3	no	yes	yes	3,0,(0)	3,0,(0)	0,0,(0)	0,0,(0)	SRR530634(2;2),SRR530636(1;1),
chr15	98691201	-	canonical	TCCTC(A*)C	A	98691175	-26	expected	1	1	yes	no	yes	0,0,(1)	0,0,(1)	0,0,(1)	0,0,(1)	SRR530634(1;1),
chr15	98763663	-	canonical	TGCTA(A*)T	A	98763626	-37	expected	1	1	yes	no	yes	0,0,(1)	0,0,(1)	0,0,(1)	0,0,(1)	SRR530636(1;1),
chr15	100320118	-	canonical	TGCTG(A*)C	A	100320097	-21	expected	1	1	yes	no	yes	0,1,(0)	0,1,(0)	0,1,(0)	0,1,(0)	SRR530636(1;1),
chr15	5067245	+	canonical	TGCTT(A*)T	A	5067286	-41	expected	6	6	yes	yes	yes	0,0,(6)	0,0,(6)	0,0,(6)	0,0,(6)	SRR530639(2;2),SRR530638(1;1),SRR530640(1;1),SRR530637(2;2),
chr15	6714998	+	canonical	AACTC(A*)C	A	6715051	-53	expected	1	1	yes	no	yes	0,0,(1)	0,0,(1)	0,0,(1)	0,0,(1)	SRR530637(1;1),
chr15	9036459	+	canonical	TCTTT(A*)T	A	9036485	-26	expected	3	2	no	no	yes	0,3,(0)	0,2,(0)	0,0,(0)	0,0,(0)	SRR530636(3;2),
chr15	12163571	+	canonical	TCCTT(A*)T	A	12163608	-37	expected	2	2	yes	yes	yes	0,0,(2)	0,0,(2)	0,0,(2)	0,0,(2)	SRR530633(1;1),SRR530636(1;1),
chr15	12835328	+	canonical	TTCTC(A*)C	A	12835353	-25	expected	1	1	yes	no	yes	0,0,(1)	0,0,(1)	0,0,(1)	0,0,(1)	SRR530633(1;1),
chr15	25740090	+	canonical	TGCTC(A*)C	A	25740113	-23	expected	1	1	yes	no	yes	0,0,(1)	0,0,(1)	0,0,(1)	0,0,(1)	SRR530637(1;1),
chr15	35352834	+	canonical	GGCTC(A*)C	A	35352870	-36	expected	1	1	no	no	yes	0,0,(1)	0,0,(1)	0,0,(0)	0,0,(0)	SRR530633(1;1),
chr15	44259786	+	canonical	TGATG(G*)T	G	44261105	-1319	distal	9	6	no	yes	yes	0,9,(0)	0,6,(0)	0,0,(0)	0,0,(0)	SRR530637(1;1),SRR530636(3;2),SRR530635(5;3),
chr15	44459900	+	canonical	GGCTG(A*)C	A	44459921	-21	expected	2	2	no	no	yes	2,0,(0)	2,0,(0)	0,0,(0)	0,0,(0)	SRR530637(2;2),
chr15	55394236	+	canonical	TTCTA(A*)T	A	55394257	-21	expected	1	1	yes	no	yes	0,0,(1)	0,0,(1)	0,0,(1)	0,0,(1)	SRR530637(1;1),
chr15	58279106	+	canonical	TTCTC(A*)C	A	58279140	-34	expected	2	2	yes	no	yes	0,0,(2)	0,0,(2)	0,0,(2)	0,0,(2)	SRR530636(2;2),
chr15	58281457	+	canonical	TCCTC(A*)T	A	58281485	-28	expected	2	1	yes	no	yes	0,2,(0)	0,1,(0)	0,2,(0)	0,1,(0)	SRR530634(2;1),
chr15	76159440	+	canonical	GGCTC(A*)T	A	76159459	-19	expected	3	3	yes	yes	yes	0,0,(3)	0,0,(3)	0,0,(3)	0,0,(3)	SRR530635(1;1),SRR530637(2;2),
chr15	76254124	+	canonical	TGCTG(A*)C	A	76254145	-21	expected	1	1	yes	no	yes	0,0,(1)	0,0,(1)	0,0,(1)	0,0,(1)	SRR530637(1;1),
chr15	76524697	+	canonical	TCCTG(A*)T	A	76524727	-30	expected	1	1	yes	no	yes	0,0,(1)	0,0,(1)	0,0,(1)	0,0,(1)	SRR530635(1;1),
chr15	78437365	+	canonical	TGCTC(A*)T	A	78437386	-21	expected	2	2	yes	yes	yes	0,0,(2)	0,0,(2)	0,0,(2)	0,0,(2)	SRR530636(1;1),SRR530637(1;1),
chr15	80078644	+	canonical	AGCTC(A*)C	A	80078670	-26	expected	1	1	yes	no	yes	0,0,(1)	0,0,(1)	0,0,(1)	0,0,(1)	SRR530635(1;1),
chr15	80080654	+	canonical	TGCTG(G*)T	G	80081636	-982	distal	1	1	no	no	yes	0,1,(0)	0,1,(0)	0,0,(0)	0,0,(0)	SRR530636(1;1),
chr15	81734267	+	canonical	TACTT(G*)T	G	81734285	-18	expected	1	1	no	no	yes	0,1,(0)	0,1,(0)	0,0,(0)	0,0,(0)	SRR530634(1;1),
chr15	81742612	+	canonical	TGCCC(A*)C	A	81742635	-23	expected	5	5	yes	yes	yes	0,3,(2)	0,3,(2)	0,0,(2)	0,0,(2)	SRR530635(2;2),SRR530636(2;2),SRR530633(1;1),
chr15	82028016	+	canonical	TGCTC(A*)C	A	82028047	-31	expected	1	1	no	no	yes	0,0,(1)	0,0,(1)	0,0,(0)	0,0,(0)	SRR530637(1;1),
chr15	84044536	+	canonical	TGTTG(A*)C	A	84044555	-19	expected	2	2	yes	yes	yes	0,0,(2)	0,0,(2)	0,0,(2)	0,0,(2)	SRR530639(1;1),SRR530637(1;1),
chr15	85694514	+	canonical	TCTTC(A*)C	A	85694536	-22	expected	1	1	yes	no	yes	0,0,(1)	0,0,(1)	0,0,(1)	0,0,(1)	SRR530634(1;1),
chr15	85706553	+	canonical	TGTTC(A*)C	A	85706578	-25	expected	4	3	yes	yes	yes	0,3,(1)	0,2,(1)	0,0,(1)	0,0,(1)	SRR530637(4;3),
chr15	85959068	+	canonical	TTCTC(A*)T	A	85959094	-26	expected	5	3	yes	yes	yes	0,0,(5)	0,0,(3)	0,0,(5)	0,0,(3)	SRR530635(2;2),SRR530636(3;1),
chr15	88915104	+	canonical	TGTCG(A*)T	A	88915127	-23	expected	1	1	yes	no	yes	0,0,(1)	0,0,(1)	0,0,(1)	0,0,(1)	SRR530634(1;1),
chr15	89112724	+	canonical	TATTT(G*)T	G	89113313	-589	distal	1	1	no	no	yes	0,1,(0)	0,1,(0)	0,0,(0)	0,0,(0)	SRR530639(1;1),
chr15	89194014	+	canonical	TGCTC(T*)T	T	89194035	-21	expected	1	1	yes	no	yes	0,1,(0)	0,1,(0)	0,1,(0)	0,1,(0)	SRR530636(1;1),
chr15	98864501	+	canonical	TTCTC(A*)C	A	98864524	-23	expected	1	1	yes	no	yes	0,0,(1)	0,0,(1)	0,0,(1)	0,0,(1)	SRR530636(1;1),
chr15	99145891	+	canonical	TTCTC(A*)C	A	99145910	-19	expected	2	2	yes	no	yes	0,2,(0)	0,2,(0)	0,2,(0)	0,2,(0)	SRR530635(2;2),
chr15	99231989	+	canonical	TATAA(A*)T	A	99232010	-21	expected	1	1	yes	no	yes	1,0,(0)	1,0,(0)	1,0,(0)	1,0,(0)	SRR530636(1;1),
chr15	99842242	+	canonical	TATAT(A*)C	A	99842266	-24	expected	1	1	no	no	yes	1,0,(0)	1,0,(0)	0,0,(0)	0,0,(0)	SRR530634(1;1),
chr15	102039563	+	canonical	TGCTC(A*)C	A	102039585	-22	expected	2	2	yes	yes	yes	0,0,(2)	0,0,(2)	0,0,(2)	0,0,(2)	SRR530635(1;1),SRR530636(1;1),
chr15	102303683	+	canonical	TGCTT(A*)C	A	102303691	-8	proximal	1	1	yes	no	yes	0,0,(1)	0,0,(1)	0,0,(1)	0,0,(1)	SRR530633(1;1),
chr15	102318612	+	canonical	TGCTG(A*)T	A	102318635	-23	expected	1	1	no	no	yes	1,0,(0)	1,0,(0)	0,0,(0)	0,0,(0)	SRR530635(1;1),
chr15	103126927	+	canonical	TTCTC(A*)C	A	103126963	-36	expected	1	1	yes	no	yes	0,0,(1)	0,0,(1)	0,0,(1)	0,0,(1)	SRR530637(1;1),
chr16	4044117	-	canonical	TCCTC(A*)T	A	4044098	-19	expected	1	1	yes	no	yes	0,0,(1)	0,0,(1)	0,0,(1)	0,0,(1)	SRR530633(1;1),
chr16	4049522	-	canonical	TGTTC(A*)C	A	4049498	-24	expected	1	1	yes	no	yes	0,0,(1)	0,0,(1)	0,0,(1)	0,0,(1)	SRR530637(1;1),
chr16	4096151	-	canonical	TGATC(A*)C	A	4096130	-21	expected	1	1	yes	no	yes	0,0,(1)	0,0,(1)	0,0,(1)	0,0,(1)	SRR530638(1;1),
chr16	4633459	-	canonical	TTCTC(A*)C	A	4633430	-29	expected	1	1	yes	no	yes	0,0,(1)	0,0,(1)	0,0,(1)	0,0,(1)	SRR530637(1;1),
chr16	4956057	-	canonical	TGCTA(A*)C	A	4956032	-25	expected	6	6	yes	yes	yes	1,1,(4)	1,1,(4)	0,0,(3)	0,0,(3)	SRR530638(1;1),SRR530634(3;3),SRR530636(1;1),SRR530635(1;1),
chr16	8699402	-	canonical	TCCTC(A*)C	A	8699380	-22	expected	1	1	yes	no	yes	0,0,(1)	0,0,(1)	0,0,(1)	0,0,(1)	SRR530637(1;1),
chr16	8705298	-	canonical	TTTTA(A*)T	A	8705277	-21	expected	2	2	yes	no	yes	0,2,(0)	0,2,(0)	0,2,(0)	0,2,(0)	SRR530636(2;2),
chr16	13837260	-	canonical	TGCCC(A*)C	A	13837240	-20	expected	1	1	no	no	yes	0,0,(1)	0,0,(1)	0,0,(0)	0,0,(0)	SRR530635(1;1),
chr16	15631949	-	canonical	TACTT(A*)C	A	15631912	-37	expected	3	3	yes	yes	yes	0,0,(3)	0,0,(3)	0,0,(3)	0,0,(3)	SRR530638(2;2),SRR530636(1;1),
chr16	17106171	-	canonical	AGCTG(A*)C	A	17106148	-23	expected	2	2	yes	yes	yes	1,0,(1)	1,0,(1)	0,0,(1)	0,0,(1)	SRR530635(1;1),SRR530637(1;1),
chr16	17355092	-	canonical	TCTTA(A*)C	A	17355059	-33	expected	1	1	yes	no	yes	0,0,(1)	0,0,(1)	0,0,(1)	0,0,(1)	SRR530637(1;1),
chr16	18080103	-	canonical	TACTG(A*)C	A	18080084	-19	expected	1	1	no	no	yes	1,0,(0)	1,0,(0)	0,0,(0)	0,0,(0)	SRR530636(1;1),
chr16	20362381	-	canonical	TACTG(A*)C	A	20362344	-37	expected	1	1	no	no	yes	1,0,(0)	1,0,(0)	0,0,(0)	0,0,(0)	SRR530635(1;1),
chr16	34033707	-	canonical	CGCTC(A*)C	A	34033685	-22	expected	1	1	no	no	yes	0,1,(0)	0,1,(0)	0,0,(0)	0,0,(0)	SRR530636(1;1),
chr16	44013172	-	canonical	TAGTC(A*)C	A	44013150	-22	expected	1	1	yes	no	yes	0,0,(1)	0,0,(1)	0,0,(1)	0,0,(1)	SRR530636(1;1),
chr16	57160287	-	canonical	TGCTC(A*)C	A	57160258	-29	expected	1	1	yes	no	yes	0,0,(1)	0,0,(1)	0,0,(1)	0,0,(1)	SRR530635(1;1),
chr16	87484331	-	canonical	TACTT(A*)C	A	87484310	-21	expected	1	1	no	no	yes	0,1,(0)	0,1,(0)	0,0,(0)	0,0,(0)	SRR530638(1;1),
chr16	87494068	-	canonical	TAATA(A*)T	A	87494031	-37	expected	2	2	no	yes	yes	2,0,(0)	2,0,(0)	0,0,(0)	0,0,(0)	SRR530638(1;1),SRR530635(1;1),
chr16	91630512	-	canonical	GGCTT(A*)C	A	91630486	-26	expected	1	1	yes	no	yes	0,0,(1)	0,0,(1)	0,0,(1)	0,0,(1)	SRR530637(1;1),
chr16	14445348	+	canonical	TTTTT(A*)T	A	14445385	-37	expected	2	1	yes	no	yes	0,0,(2)	0,0,(1)	0,0,(2)	0,0,(1)	SRR530638(2;1),
chr16	15705243	+	canonical	TGTTA(A*)T	A	15705263	-20	expected	1	1	yes	no	yes	0,0,(1)	0,0,(1)	0,0,(1)	0,0,(1)	SRR530637(1;1),
chr16	16887653	+	canonical	TGGTT(A*)C	A	16887669	-16	expected	2	2	no	no	yes	0,0,(2)	0,0,(2)	0,0,(0)	0,0,(0)	SRR530636(2;2),
chr16	17522450	+	canonical	TGCCC(A*)T	A	17522473	-23	expected	1	1	no	no	yes	0,0,(1)	0,0,(1)	0,0,(0)	0,0,(0)	SRR530635(1;1),
chr16	18826318	+	canonical	AGCTC(A*)T	A	18826347	-29	expected	1	1	yes	no	yes	0,0,(1)	0,0,(1)	0,0,(1)	0,0,(1)	SRR530633(1;1),
chr16	18922930	+	canonical	TCCTG(A*)C	A	18922946	-16	expected	2	2	no	yes	yes	1,0,(1)	1,0,(1)	0,0,(0)	0,0,(0)	SRR530636(1;1),SRR530633(1;1),
chr16	20551858	+	canonical	CGCTA(A*)T	A	20551878	-20	expected	1	1	yes	no	yes	0,0,(1)	0,0,(1)	0,0,(1)	0,0,(1)	SRR530639(1;1),
chr16	20680758	+	canonical	TGTTC(A*)C	A	20680785	-27	expected	1	1	yes	no	yes	0,0,(1)	0,0,(1)	0,0,(1)	0,0,(1)	SRR530634(1;1),
chr16	23107981	+	canonical	TGCAG(G*)T	G	23108660	-679	distal	1	1	no	no	yes	0,1,(0)	0,1,(0)	0,0,(0)	0,0,(0)	SRR530636(1;1),
chr16	23111553	+	canonical	TCTTG(A*)T	A	23111575	-22	expected	4	4	yes	yes	yes	0,0,(4)	0,0,(4)	0,0,(4)	0,0,(4)	SRR530634(1;1),SRR530636(1;1),SRR530637(1;1),SRR530638(1;1),
chr16	23113214	+	canonical	TGCTG(A*)C	A	23113239	-25	expected	5	5	yes	yes	yes	0,1,(4)	0,1,(4)	0,0,(4)	0,0,(4)	SRR530634(2;2),SRR530636(1;1),SRR530638(1;1),SRR530637(1;1),
chr16	29605569	+	canonical	TTCTT(A*)C	A	29605597	-28	expected	1	1	no	no	yes	0,1,(0)	0,1,(0)	0,0,(0)	0,0,(0)	SRR530635(1;1),
chr16	32680968	+	canonical	TGCTG(A*)T	A	32680985	-17	expected	3	2	no	no	yes	3,0,(0)	2,0,(0)	0,0,(0)	0,0,(0)	SRR530636(3;2),
chr16	33057449	+	canonical	TAGTC(A*)T	A	33057475	-26	expected	3	2	yes	yes	yes	0,0,(3)	0,0,(2)	0,0,(3)	0,0,(2)	SRR530638(2;1),SRR530636(1;1),
chr16	33060155	+	canonical	TATTC(A*)C	A	33060183	-28	expected	2	2	yes	no	yes	0,0,(2)	0,0,(2)	0,0,(2)	0,0,(2)	SRR530637(2;2),
chr16	33763491	+	canonical	TATTG(A*)T	A	33763527	-36	expected	2	2	no	yes	yes	0,0,(2)	0,0,(2)	0,0,(0)	0,0,(0)	SRR530637(1;1),SRR530638(1;1),
chr16	49016035	+	canonical	CACTA(A*)C	A	49016056	-21	expected	2	2	yes	yes	yes	0,1,(1)	0,1,(1)	0,0,(1)	0,0,(1)	SRR530635(1;1),SRR530637(1;1),
chr16	49910954	+	canonical	TAGTG(A*)C	A	49910981	-27	expected	4	3	yes	no	yes	0,0,(4)	0,0,(3)	0,0,(4)	0,0,(3)	SRR530637(4;3),
chr16	90225363	+	canonical	TGTTC(A*)T	A	90225389	-26	expected	6	6	yes	yes	yes	0,0,(6)	0,0,(6)	0,0,(6)	0,0,(6)	SRR530637(3;3),SRR530640(1;1),SRR530636(2;2),
chr16	91654835	+	canonical	GGCTG(A*)C	A	91654855	-20	expected	1	1	yes	no	yes	0,0,(1)	0,0,(1)	0,0,(1)	0,0,(1)	SRR530638(1;1),
chr16	91851028	+	canonical	TGCTT(A*)C	A	91851050	-22	expected	1	1	yes	no	yes	0,0,(1)	0,0,(1)	0,0,(1)	0,0,(1)	SRR530636(1;1),
chr16	93865185	+	canonical	TGCTC(A*)T	A	93865204	-19	expected	1	1	yes	no	yes	0,0,(1)	0,0,(1)	0,0,(1)	0,0,(1)	SRR530638(1;1),
chr16	94614696	+	canonical	TTCTG(A*)C	A	94614718	-22	expected	1	1	yes	no	yes	0,0,(1)	0,0,(1)	0,0,(1)	0,0,(1)	SRR530636(1;1),
chr16	94890391	+	canonical	TGATG(A*)T	A	94890411	-20	expected	1	1	no	no	yes	1,0,(0)	1,0,(0)	0,0,(0)	0,0,(0)	SRR530637(1;1),
chr17	23722557	-	canonical	TGATT(A*)C	A	23722541	-16	expected	1	1	yes	no	yes	0,1,(0)	0,1,(0)	0,1,(0)	0,1,(0)	SRR530639(1;1),
chr17	24293660	-	canonical	TGCTC(A*)C	A	24293639	-21	expected	1	1	yes	no	yes	0,0,(1)	0,0,(1)	0,0,(1)	0,0,(1)	SRR530636(1;1),
chr17	24740269	-	canonical	TGGTC(A*)C	A	24740243	-26	expected	1	1	yes	no	yes	0,0,(1)	0,0,(1)	0,0,(1)	0,0,(1)	SRR530639(1;1),
chr17	25405328	-	canonical	TGCGC(A*)T	A	25402173	-3155	distal	1	1	yes	no	yes	0,0,(1)	0,0,(1)	0,0,(1)	0,0,(1)	SRR530636(1;1),
chr17	25856389	-	canonical	AGCTG(A*)C	A	25856370	-19	expected	4	4	yes	yes	yes	1,0,(3)	1,0,(3)	0,0,(3)	0,0,(3)	SRR530638(1;1),SRR530640(1;1),SRR530635(1;1),SRR530634(1;1),
chr17	25980128	-	canonical	TGCTT(A*)C	A	25980105	-23	expected	2	2	no	yes	yes	1,1,(0)	1,1,(0)	0,0,(0)	0,0,(0)	SRR530637(1;1),SRR530635(1;1),
chr17	27330948	-	canonical	TGTTT(A*)C	A	27330928	-20	expected	1	1	yes	no	yes	0,0,(1)	0,0,(1)	0,0,(1)	0,0,(1)	SRR530637(1;1),
chr17	27769323	-	canonical	CACTC(A*)C	A	27769301	-22	expected	4	4	yes	yes	yes	0,0,(4)	0,0,(4)	0,0,(4)	0,0,(4)	SRR530636(1;1),SRR530634(2;2),SRR530639(1;1),
chr17	28735966	-	canonical	TACTG(A*)T	A	28735947	-19	expected	1	1	yes	no	yes	0,1,(0)	0,1,(0)	0,1,(0)	0,1,(0)	SRR530634(1;1),
chr17	28736841	-	canonical	TACAC(A*)C	A	28736814	-27	expected	2	2	yes	yes	yes	0,0,(2)	0,0,(2)	0,0,(2)	0,0,(2)	SRR530640(1;1),SRR530633(1;1),
chr17	31784324	-	canonical	TTCTG(A*)T	A	31784300	-24	expected	1	1	no	no	yes	1,0,(0)	1,0,(0)	0,0,(0)	0,0,(0)	SRR530633(1;1),
chr17	32453635	-	canonical	TCCTA(A*)T	A	32453612	-23	expected	1	1	no	no	yes	0,1,(0)	0,1,(0)	0,0,(0)	0,0,(0)	SRR530639(1;1),
chr17	32455772	-	canonical	TCTTG(A*)C	A	32455754	-18	expected	1	1	yes	no	yes	0,0,(1)	0,0,(1)	0,0,(1)	0,0,(1)	SRR530638(1;1),
chr17	33884778	-	canonical	TGCTC(A*)C	A	33884758	-20	expected	1	1	yes	no	yes	0,0,(1)	0,0,(1)	0,0,(1)	0,0,(1)	SRR530635(1;1),
chr17	34252232	-	canonical	GACTG(A*)T	A	34252209	-23	expected	1	1	no	no	yes	1,0,(0)	1,0,(0)	0,0,(0)	0,0,(0)	SRR530633(1;1),
chr17	35089136	-	canonical	TGCTC(A*)T	A	35089118	-18	expected	3	3	yes	yes	yes	0,0,(3)	0,0,(3)	0,0,(3)	0,0,(3)	SRR530634(1;1),SRR530636(1;1),SRR530640(1;1),
chr17	45708152	-	canonical	TGCTG(A*)T	A	45708126	-26	expected	35	34	yes	yes	yes	13,0,(22)	12,0,(22)	0,0,(22)	0,0,(22)	SRR530638(1;1),SRR530633(2;2),SRR530637(9;9),SRR530640(5;5),SRR530639(3;3),SRR530635(7;7),SRR530636(2;2),SRR530634(6;5),
chr17	48530708	-	canonical	TTCTC(A*)C	A	48530675	-33	expected	1	1	yes	no	yes	0,0,(1)	0,0,(1)	0,0,(1)	0,0,(1)	SRR530640(1;1),
chr17	56334505	-	canonical	TGGTC(A*)C	A	56334483	-22	expected	1	1	yes	no	yes	0,0,(1)	0,0,(1)	0,0,(1)	0,0,(1)	SRR530635(1;1),
chr17	56706459	-	canonical	TTCTC(A*)C	A	56706441	-18	expected	1	1	no	no	yes	0,0,(1)	0,0,(1)	0,0,(0)	0,0,(0)	SRR530636(1;1),
chr17	56718434	-	canonical	TTCTA(A*)C	A	56718408	-26	expected	1	1	yes	no	yes	0,0,(1)	0,0,(1)	0,0,(1)	0,0,(1)	SRR530636(1;1),
chr17	83902098	-	canonical	AACTC(A*)C	A	83902077	-21	expected	1	1	no	no	yes	0,0,(1)	0,0,(1)	0,0,(0)	0,0,(0)	SRR530635(1;1),
chr17	87833425	-	canonical	GACTC(A*)C	A	87833395	-30	expected	4	4	yes	yes	yes	1,0,(3)	1,0,(3)	0,0,(3)	0,0,(3)	SRR530637(1;1),SRR530639(1;1),SRR530635(2;2),
chr17	3163255	+	canonical	TCCTT(A*)C	A	3164146	-891	distal	1	1	yes	no	yes	0,1,(0)	0,1,(0)	0,1,(0)	0,1,(0)	SRR530637(1;1),
chr17	6201677	+	canonical	TATTC(A*)C	A	6201699	-22	expected	1	1	yes	no	yes	0,0,(1)	0,0,(1)	0,0,(1)	0,0,(1)	SRR530637(1;1),
chr17	15554570	+	canonical	TACTC(A*)C	A	15554596	-26	expected	1	1	yes	no	yes	0,0,(1)	0,0,(1)	0,0,(1)	0,0,(1)	SRR530638(1;1),
chr17	23870768	+	canonical	TGCTT(C*)T	C	23870789	-21	expected	2	2	yes	yes	yes	0,0,(2)	0,0,(2)	0,0,(1)	0,0,(1)	SRR530634(1;1),SRR530633(1;1),
chr17	24857185	+	canonical	TGCTG(A*)T	A	24857217	-32	expected	13	11	yes	yes	yes	8,0,(5)	7,0,(4)	0,0,(5)	0,0,(4)	SRR530637(6;5),SRR530639(3;2),SRR530635(2;2),SRR530636(2;2),
chr17	25792306	+	canonical	GACTC(A*)C	A	25792329	-23	expected	1	1	yes	no	yes	0,0,(1)	0,0,(1)	0,0,(1)	0,0,(1)	SRR530637(1;1),
chr17	27842549	+	canonical	TGCCC(A*)C	A	27842569	-20	expected	1	1	no	no	yes	1,0,(0)	1,0,(0)	0,0,(0)	0,0,(0)	SRR530640(1;1),
chr17	28022330	+	canonical	GGCTC(A*)C	A	28022351	-21	expected	1	1	yes	no	yes	0,0,(1)	0,0,(1)	0,0,(1)	0,0,(1)	SRR530634(1;1),
chr17	28123462	+	canonical	CGCTC(A*)C	A	28123495	-33	expected	1	1	yes	no	yes	0,0,(1)	0,0,(1)	0,0,(1)	0,0,(1)	SRR530635(1;1),
chr17	28465892	+	canonical	GGCTC(A*)C	A	28465911	-19	expected	4	4	yes	yes	yes	0,0,(4)	0,0,(4)	0,0,(3)	0,0,(3)	SRR530637(2;2),SRR530634(2;2),
chr17	29763423	+	canonical	AGCTT(A*)T	A	29763450	-27	expected	2	2	yes	yes	yes	0,1,(1)	0,1,(1)	0,0,(1)	0,0,(1)	SRR530636(2;2),
chr17	29823959	+	canonical	AACTC(A*)C	A	29823980	-21	expected	1	1	no	no	yes	0,0,(1)	0,0,(1)	0,0,(0)	0,0,(0)	SRR530633(1;1),
chr17	31245536	+	canonical	TACTC(A*)C	A	31245559	-23	expected	1	1	yes	no	yes	0,0,(1)	0,0,(1)	0,0,(1)	0,0,(1)	SRR530636(1;1),
chr17	32657472	+	canonical	TGCTG(G*)T	G	32659062	-1590	distal	1	1	no	no	yes	0,0,(1)	0,0,(1)	0,0,(0)	0,0,(0)	SRR530640(1;1),
chr17	33767292	+	canonical	TAATG(A*)C	A	33767311	-19	expected	1	1	yes	no	yes	0,0,(1)	0,0,(1)	0,0,(1)	0,0,(1)	SRR530638(1;1),
chr17	34196593	+	canonical	AGCTG(A*)C	A	34196623	-30	expected	1	1	no	no	yes	1,0,(0)	1,0,(0)	0,0,(0)	0,0,(0)	SRR530633(1;1),
chr17	34350937	+	canonical	TGCTG(A*)C	A	34350959	-22	expected	2	2	no	no	yes	2,0,(0)	2,0,(0)	0,0,(0)	0,0,(0)	SRR530636(2;2),
chr17	35237876	+	canonical	GGCTG(A*)C	A	35237906	-30	expected	1	1	no	no	yes	1,0,(0)	1,0,(0)	0,0,(0)	0,0,(0)	SRR530636(1;1),
chr17	35283671	+	canonical	TATTG(A*)T	A	35283701	-30	expected	2	2	no	no	yes	2,0,(0)	2,0,(0)	0,0,(0)	0,0,(0)	SRR530634(2;2),
chr17	35380020	+	canonical	GACTG(A*)T	A	35380057	-37	expected	1	1	no	no	yes	1,0,(0)	1,0,(0)	0,0,(0)	0,0,(0)	SRR530638(1;1),
chr17	35385857	+	canonical	GACTC(A*)C	A	35385895	-38	expected	1	1	yes	no	yes	0,0,(1)	0,0,(1)	0,0,(1)	0,0,(1)	SRR530633(1;1),
chr17	36054106	+	canonical	TACTG(A*)T	A	36054142	-36	expected	3	3	yes	yes	yes	1,0,(2)	1,0,(2)	0,0,(2)	0,0,(2)	SRR530636(1;1),SRR530635(2;2),
chr17	40968501	+	canonical	TAATA(A*)C	A	40968524	-23	expected	1	1	yes	no	yes	0,1,(0)	0,1,(0)	0,1,(0)	0,1,(0)	SRR530636(1;1),
chr17	40970333	+	canonical	TCCTC(A*)T	A	40970357	-24	expected	2	2	yes	no	yes	0,0,(2)	0,0,(2)	0,0,(2)	0,0,(2)	SRR530636(2;2),
chr17	45697338	+	canonical	AGCTG(A*)C	A	45697356	-18	expected	5	4	yes	yes	yes	4,0,(1)	3,0,(1)	0,0,(1)	0,0,(1)	SRR530637(2;2),SRR530638(3;2),
chr17	56101421	+	canonical	CACTC(A*)C	A	56101441	-20	expected	1	1	yes	no	yes	0,0,(1)	0,0,(1)	0,0,(1)	0,0,(1)	SRR530634(1;1),
chr17	56232921	+	canonical	TGGTG(A*)C	A	56232944	-23	expected	1	1	no	no	yes	0,1,(0)	0,1,(0)	0,0,(0)	0,0,(0)	SRR530637(1;1),
chr17	56745194	+	canonical	TGCCC(A*)C	A	56745219	-25	expected	8	8	yes	yes	yes	3,0,(5)	3,0,(5)	0,0,(3)	0,0,(3)	SRR530635(1;1),SRR530634(3;3),SRR530636(2;2),SRR530637(2;2),
chr17	57135281	+	canonical	TACCC(A*)C	A	57135300	-19	expected	1	1	yes	no	yes	0,0,(1)	0,0,(1)	0,0,(1)	0,0,(1)	SRR530636(1;1),
chr17	66165238	+	canonical	TGTTT(A*)T	A	66165262	-24	expected	1	1	yes	no	yes	0,0,(1)	0,0,(1)	0,0,(1)	0,0,(1)	SRR530637(1;1),
chr17	71564284	+	canonical	TGCTG(A*)C	A	71564303	-19	expected	1	1	no	no	yes	1,0,(0)	1,0,(0)	0,0,(0)	0,0,(0)	SRR530635(1;1),
chr17	71590961	+	canonical	TATAC(A*)T	A	71590983	-22	expected	1	1	yes	no	yes	0,0,(1)	0,0,(1)	0,0,(1)	0,0,(1)	SRR530637(1;1),
chr17	71999330	+	canonical	TGCTG(A*)T	A	71999356	-26	expected	1	1	yes	no	yes	0,0,(1)	0,0,(1)	0,0,(1)	0,0,(1)	SRR530639(1;1),
chr17	74957219	+	canonical	TGCTT(A*)C	A	74957240	-21	expected	1	1	yes	no	yes	0,0,(1)	0,0,(1)	0,0,(1)	0,0,(1)	SRR530636(1;1),
chr17	75017756	+	canonical	TATTA(A*)T	A	75017775	-19	expected	1	1	no	no	yes	0,1,(0)	0,1,(0)	0,0,(0)	0,0,(0)	SRR530634(1;1),
chr18	34607839	-	canonical	TCCTG(A*)T	A	34607775	-64	distal	1	1	no	no	yes	0,0,(1)	0,0,(1)	0,0,(0)	0,0,(0)	SRR530636(1;1),
chr18	35098069	-	canonical	TAGTG(A*)T	A	35098047	-22	expected	4	4	yes	yes	yes	0,1,(3)	0,1,(3)	0,1,(3)	0,1,(3)	SRR530638(2;2),SRR530637(2;2),
chr18	35108817	-	canonical	TACTT(A*)C	A	35108795	-22	expected	1	1	yes	no	yes	0,0,(1)	0,0,(1)	0,0,(1)	0,0,(1)	SRR530638(1;1),
chr18	36902332	-	canonical	TATTC(A*)T	A	36902312	-20	expected	1	1	no	no	yes	0,0,(1)	0,0,(1)	0,0,(0)	0,0,(0)	SRR530636(1;1),
chr18	38133331	-	canonical	TGCCC(A*)C	A	38133305	-26	expected	1	1	yes	no	yes	0,1,(0)	0,1,(0)	0,1,(0)	0,1,(0)	SRR530634(1;1),
chr18	46406345	-	canonical	TGTTA(A*)T	A	46406324	-21	expected	1	1	yes	no	yes	0,0,(1)	0,0,(1)	0,0,(1)	0,0,(1)	SRR530636(1;1),
chr18	61458463	-	canonical	TTCTC(A*)C	A	61458437	-26	expected	1	1	no	no	yes	0,0,(1)	0,0,(1)	0,0,(0)	0,0,(0)	SRR530638(1;1),
chr18	80631092	-	canonical	TCCTC(A*)C	A	80631067	-25	expected	1	1	yes	no	yes	0,0,(1)	0,0,(1)	0,0,(1)	0,0,(1)	SRR530633(1;1),
chr18	80863925	-	canonical	TACTT(A*)C	A	80863899	-26	expected	1	1	yes	no	yes	0,0,(1)	0,0,(1)	0,0,(1)	0,0,(1)	SRR530636(1;1),
chr18	80950777	-	canonical	TATTT(A*)C	A	80950752	-25	expected	1	1	yes	no	yes	0,0,(1)	0,0,(1)	0,0,(1)	0,0,(1)	SRR530633(1;1),
chr18	80958994	-	canonical	TACTT(G*)T	G	80958971	-23	expected	2	2	yes	no	yes	0,0,(2)	0,0,(2)	0,0,(2)	0,0,(2)	SRR530636(2;2),
chr18	4386927	+	canonical	TTCTT(A*)T	A	4386950	-23	expected	2	2	yes	no	yes	0,0,(2)	0,0,(2)	0,0,(2)	0,0,(2)	SRR530636(2;2),
chr18	7905896	+	canonical	TACTC(A*)T	A	7905929	-33	expected	1	1	yes	no	yes	0,0,(1)	0,0,(1)	0,0,(1)	0,0,(1)	SRR530635(1;1),
chr18	7918414	+	canonical	TAATT(A*)C	A	7918430	-16	expected	1	1	yes	no	yes	0,0,(1)	0,0,(1)	0,0,(1)	0,0,(1)	SRR530635(1;1),
chr18	10751794	+	canonical	TTTTC(A*)T	A	10751820	-26	expected	1	1	yes	no	yes	0,0,(1)	0,0,(1)	0,0,(1)	0,0,(1)	SRR530638(1;1),
chr18	11836537	+	canonical	TTCTT(A*)C	A	11851520	-14983	distal	1	1	yes	no	yes	0,0,(1)	0,0,(1)	0,0,(1)	0,0,(1)	SRR530635(1;1),
chr18	31995003	+	canonical	TGCTG(A*)C	A	31995037	-34	expected	1	1	yes	no	yes	0,0,(1)	0,0,(1)	0,0,(1)	0,0,(1)	SRR530637(1;1),
chr18	33014415	+	canonical	TACTT(A*)C	A	33014433	-18	expected	1	1	yes	no	yes	0,0,(1)	0,0,(1)	0,0,(1)	0,0,(1)	SRR530636(1;1),
chr18	35770500	+	canonical	TGCTC(A*)T	A	35770524	-24	expected	2	2	no	no	yes	0,0,(2)	0,0,(2)	0,0,(0)	0,0,(0)	SRR530636(2;2),
chr18	36913522	+	canonical	TACTG(A*)C	A	36913545	-23	expected	1	1	yes	no	yes	0,0,(1)	0,0,(1)	0,0,(1)	0,0,(1)	SRR530636(1;1),
chr18	36945499	+	canonical	TCTTT(A*)C	A	36945522	-23	expected	1	1	yes	no	yes	0,0,(1)	0,0,(1)	0,0,(1)	0,0,(1)	SRR530634(1;1),
chr18	42486795	+	canonical	TACTG(A*)C	A	42486817	-22	expected	1	1	yes	no	yes	0,0,(1)	0,0,(1)	0,0,(1)	0,0,(1)	SRR530638(1;1),
chr18	42709467	+	canonical	TGATG(A*)C	A	42709491	-24	expected	1	1	yes	no	yes	0,0,(1)	0,0,(1)	0,0,(1)	0,0,(1)	SRR530636(1;1),
chr18	58832877	+	canonical	TTCTT(A*)C	A	58832903	-26	expected	1	1	yes	no	yes	0,0,(1)	0,0,(1)	0,0,(1)	0,0,(1)	SRR530634(1;1),
chr18	60705377	+	canonical	TTCTA(A*)T	A	60705401	-24	expected	1	1	no	no	yes	0,1,(0)	0,1,(0)	0,0,(0)	0,0,(0)	SRR530637(1;1),
chr18	60936034	+	canonical	TGCTA(A*)C	A	60936054	-20	expected	1	1	no	no	yes	1,0,(0)	1,0,(0)	0,0,(0)	0,0,(0)	SRR530635(1;1),
chr18	60937439	+	canonical	TGCTG(A*)C	A	60937466	-27	expected	3	3	yes	yes	yes	1,0,(2)	1,0,(2)	0,0,(2)	0,0,(2)	SRR530637(2;2),SRR530634(1;1),
chr18	60968658	+	canonical	TGCTG(G*)T	G	60968681	-23	expected	1	1	no	no	yes	0,1,(0)	0,1,(0)	0,0,(0)	0,0,(0)	SRR530637(1;1),
chr18	65977078	+	canonical	TGTTG(A*)C	A	65977113	-35	expected	1	1	yes	no	yes	0,0,(1)	0,0,(1)	0,0,(1)	0,0,(1)	SRR530638(1;1),
chr18	78019931	+	canonical	TGGTG(A*)C	A	78019950	-19	expected	1	1	yes	no	yes	0,0,(1)	0,0,(1)	0,0,(1)	0,0,(1)	SRR530634(1;1),
chr18	78175840	+	canonical	TGCTC(A*)C	A	78175862	-22	expected	1	1	yes	no	yes	0,0,(1)	0,0,(1)	0,0,(1)	0,0,(1)	SRR530634(1;1),
chr19	3591135	-	canonical	TTCTG(A*)C	A	3591113	-22	expected	1	1	yes	no	yes	0,0,(1)	0,0,(1)	0,0,(1)	0,0,(1)	SRR530634(1;1),
chr19	4188333	-	canonical	TACTC(A*)C	A	4188311	-22	expected	1	1	yes	no	yes	0,0,(1)	0,0,(1)	0,0,(1)	0,0,(1)	SRR530637(1;1),
chr19	4794036	-	canonical	TACTG(A*)C	A	4794009	-27	expected	1	1	no	no	yes	1,0,(0)	1,0,(0)	0,0,(0)	0,0,(0)	SRR530636(1;1),
chr19	5295115	-	canonical	TGCTG(A*)C	A	5295087	-28	expected	1	1	no	no	yes	1,0,(0)	1,0,(0)	0,0,(0)	0,0,(0)	SRR530634(1;1),
chr19	5380554	-	canonical	TTCTG(A*)T	A	5380527	-27	expected	2	2	no	no	yes	2,0,(0)	2,0,(0)	0,0,(0)	0,0,(0)	SRR530636(2;2),
chr19	5667272	-	canonical	TGCTG(A*)C	A	5667252	-20	expected	1	1	no	no	yes	1,0,(0)	1,0,(0)	0,0,(0)	0,0,(0)	SRR530635(1;1),
chr19	5679757	-	canonical	TCCTC(A*)C	A	5679741	-16	expected	4	4	yes	yes	yes	0,0,(4)	0,0,(4)	0,0,(4)	0,0,(4)	SRR530634(2;2),SRR530636(1;1),SRR530637(1;1),
chr19	5686243	-	canonical	TTCTC(A*)T	A	5686219	-24	expected	3	3	yes	no	yes	0,0,(3)	0,0,(3)	0,0,(1)	0,0,(1)	SRR530635(3;3),
chr19	5759367	-	canonical	TGCTC(A*)T	A	5759342	-25	expected	2	2	yes	yes	yes	0,0,(2)	0,0,(2)	0,0,(1)	0,0,(1)	SRR530634(1;1),SRR530635(1;1),
chr19	5904569	-	canonical	CGCTC(A*)T	A	5904546	-23	expected	1	1	yes	no	yes	0,0,(1)	0,0,(1)	0,0,(1)	0,0,(1)	SRR530636(1;1),
chr19	5943348	-	canonical	TATTC(A*)T	A	5943329	-19	expected	1	1	yes	no	yes	0,0,(1)	0,0,(1)	0,0,(1)	0,0,(1)	SRR530637(1;1),
chr19	6009195	-	canonical	TTCTG(A*)C	A	6009170	-25	expected	1	1	no	no	yes	1,0,(0)	1,0,(0)	0,0,(0)	0,0,(0)	SRR530633(1;1),
chr19	6930765	-	canonical	TCCTG(A*)T	A	6930742	-23	expected	1	1	no	no	yes	1,0,(0)	1,0,(0)	0,0,(0)	0,0,(0)	SRR530638(1;1),
chr19	7103743	-	canonical	CACTC(A*)C	A	7103724	-19	expected	1	1	yes	no	yes	0,0,(1)	0,0,(1)	0,0,(1)	0,0,(1)	SRR530634(1;1),
chr19	7304316	-	canonical	CGCTC(A*)T	A	7304295	-21	expected	1	1	yes	no	yes	0,0,(1)	0,0,(1)	0,0,(1)	0,0,(1)	SRR530634(1;1),
chr19	12850587	-	canonical	TACTA(A*)C	A	12850563	-24	expected	1	1	yes	no	yes	0,0,(1)	0,0,(1)	0,0,(1)	0,0,(1)	SRR530634(1;1),
chr19	16056316	-	canonical	TACTG(A*)T	A	16056290	-26	expected	2	1	no	no	yes	2,0,(0)	1,0,(0)	0,0,(0)	0,0,(0)	SRR530636(2;1),
chr19	16761156	-	canonical	TGCAT(A*)C	A	16761133	-23	expected	2	2	yes	no	yes	0,0,(2)	0,0,(2)	0,0,(2)	0,0,(2)	SRR530636(2;2),
chr19	32119536	-	canonical	AGCTT(A*)C	A	32119507	-29	expected	1	1	no	no	yes	0,1,(0)	0,1,(0)	0,0,(0)	0,0,(0)	SRR530636(1;1),
chr19	41356525	-	canonical	TGCTC(A*)C	A	41356497	-28	expected	1	1	yes	no	yes	0,0,(1)	0,0,(1)	0,0,(1)	0,0,(1)	SRR530637(1;1),
chr19	41723566	-	canonical	TTCTC(A*)C	A	41723546	-20	expected	1	1	yes	no	yes	0,0,(1)	0,0,(1)	0,0,(1)	0,0,(1)	SRR530636(1;1),
chr19	41939800	-	canonical	GGCTC(A*)C	A	41939744	-56	expected	1	1	yes	no	yes	0,0,(1)	0,0,(1)	0,0,(1)	0,0,(1)	SRR530634(1;1),
chr19	41960264	-	canonical	TGCTG(A*)C	A	41960228	-36	expected	1	1	no	no	yes	1,0,(0)	1,0,(0)	0,0,(0)	0,0,(0)	SRR530635(1;1),
chr19	43581536	-	canonical	AGCTG(A*)T	A	43581516	-20	expected	1	1	no	no	yes	1,0,(0)	1,0,(0)	0,0,(0)	0,0,(0)	SRR530635(1;1),
chr19	44592782	-	canonical	AGCTC(A*)C	A	44592750	-32	expected	1	1	yes	no	yes	0,0,(1)	0,0,(1)	0,0,(1)	0,0,(1)	SRR530637(1;1),
chr19	46971071	-	canonical	TTCTT(A*)T	A	46971051	-20	expected	1	1	no	no	yes	1,0,(0)	1,0,(0)	0,0,(0)	0,0,(0)	SRR530637(1;1),
chr19	53086429	-	canonical	TGTTC(A*)T	A	53086399	-30	expected	1	1	no	no	yes	1,0,(0)	1,0,(0)	0,0,(0)	0,0,(0)	SRR530636(1;1),
chr19	53455115	-	canonical	AACTC(A*)T	A	53455091	-24	expected	3	3	yes	yes	yes	0,0,(3)	0,0,(3)	0,0,(3)	0,0,(3)	SRR530635(1;1),SRR530636(2;2),
chr19	53458228	-	canonical	TGCTT(A*)C	A	53458208	-20	expected	2	2	yes	yes	yes	0,0,(2)	0,0,(2)	0,0,(2)	0,0,(2)	SRR530634(1;1),SRR530636(1;1),
chr19	55378257	-	canonical	TACTA(A*)C	A	55378228	-29	expected	1	1	yes	no	yes	0,0,(1)	0,0,(1)	0,0,(1)	0,0,(1)	SRR530637(1;1),
chr19	56616112	-	canonical	TGCAG(A*)T	A	56614812	-1300	distal	1	1	no	no	yes	1,0,(0)	1,0,(0)	0,0,(0)	0,0,(0)	SRR530636(1;1),
chr19	60941254	-	canonical	TGTTA(A*)T	A	60941234	-20	expected	1	1	yes	no	yes	0,0,(1)	0,0,(1)	0,0,(1)	0,0,(1)	SRR530635(1;1),
chr19	6252673	+	canonical	GGCTC(A*)C	A	6252689	-16	expected	3	2	yes	yes	yes	2,0,(1)	1,0,(1)	0,0,(1)	0,0,(1)	SRR530636(2;1),SRR530635(1;1),
chr19	8798779	+	canonical	TTCTG(A*)T	A	8798892	-113	distal	1	1	no	no	yes	0,0,(1)	0,0,(1)	0,0,(0)	0,0,(0)	SRR530636(1;1),
chr19	8799955	+	canonical	TGCTG(A*)T	A	8799974	-19	expected	1	1	yes	no	yes	0,0,(1)	0,0,(1)	0,0,(1)	0,0,(1)	SRR530635(1;1),
chr19	8837145	+	canonical	TGTTT(A*)T	A	8837172	-27	expected	1	1	yes	no	yes	0,0,(1)	0,0,(1)	0,0,(1)	0,0,(1)	SRR530636(1;1),
chr19	9025941	+	canonical	TGCTC(A*)T	A	9025979	-38	expected	2	2	yes	yes	yes	0,0,(2)	0,0,(2)	0,0,(2)	0,0,(2)	SRR530636(1;1),SRR530638(1;1),
chr19	9043627	+	canonical	TGTTT(A*)T	A	9043651	-24	expected	1	1	no	no	yes	0,0,(1)	0,0,(1)	0,0,(0)	0,0,(0)	SRR530637(1;1),
chr19	10971966	+	canonical	TGCTC(A*)C	A	10971992	-26	expected	2	1	yes	no	yes	0,0,(2)	0,0,(1)	0,0,(2)	0,0,(1)	SRR530636(2;1),
chr19	10979500	+	canonical	TTCTC(A*)C	A	10979524	-24	expected	1	1	no	no	yes	0,0,(1)	0,0,(1)	0,0,(0)	0,0,(0)	SRR530636(1;1),
chr19	25154228	+	canonical	TATAG(A*)C	A	25154248	-20	expected	1	1	no	no	yes	1,0,(0)	1,0,(0)	0,0,(0)	0,0,(0)	SRR530637(1;1),
chr19	25193878	+	canonical	TGTTG(A*)T	A	25193901	-23	expected	1	1	yes	no	yes	0,1,(0)	0,1,(0)	0,1,(0)	0,1,(0)	SRR530634(1;1),
chr19	26826274	+	canonical	TCCTT(A*)C	A	26826313	-39	expected	1	1	yes	no	yes	0,0,(1)	0,0,(1)	0,0,(1)	0,0,(1)	SRR530637(1;1),
chr19	39016920	+	canonical	TATTA(A*)T	A	39016943	-23	expected	1	1	no	no	yes	0,1,(0)	0,1,(0)	0,0,(0)	0,0,(0)	SRR530637(1;1),
chr19	41602490	+	canonical	TATTC(A*)C	A	41602510	-20	expected	1	1	yes	no	yes	0,0,(1)	0,0,(1)	0,0,(1)	0,0,(1)	SRR530634(1;1),
chr19	42179797	+	canonical	TGCTT(T*)T	T	42179819	-22	expected	1	1	no	no	yes	0,0,(1)	0,0,(1)	0,0,(0)	0,0,(0)	SRR530640(1;1),
chr19	42255970	+	canonical	CACTC(A*)C	A	42255991	-21	expected	2	2	no	no	yes	0,0,(2)	0,0,(2)	0,0,(0)	0,0,(0)	SRR530636(2;2),
chr19	46145751	+	canonical	TTTTC(A*)C	A	46145766	-15	expected	1	1	no	no	yes	0,0,(1)	0,0,(1)	0,0,(0)	0,0,(0)	SRR530637(1;1),
chr19	46340494	+	canonical	TGTTT(A*)T	A	46340514	-20	expected	3	2	yes	yes	yes	0,0,(3)	0,0,(2)	0,0,(3)	0,0,(2)	SRR530636(2;1),SRR530635(1;1),
chr19	46357499	+	canonical	TATTC(A*)C	A	46357524	-25	expected	2	2	yes	no	yes	0,0,(2)	0,0,(2)	0,0,(2)	0,0,(2)	SRR530636(2;2),
chr19	46587566	+	canonical	TGCTC(A*)T	A	46587597	-31	expected	4	3	yes	yes	yes	0,0,(4)	0,0,(3)	0,0,(2)	0,0,(2)	SRR530637(1;1),SRR530633(1;1),SRR530636(2;1),
chr19	47167253	+	canonical	AGCTC(A*)C	A	47167271	-18	expected	3	3	yes	yes	yes	0,0,(3)	0,0,(3)	0,0,(2)	0,0,(2)	SRR530636(1;1),SRR530635(1;1),SRR530638(1;1),
chr19	47182018	+	canonical	TGTTA(G*)T	G	47182043	-25	expected	2	2	yes	yes	yes	0,2,(0)	0,2,(0)	0,2,(0)	0,2,(0)	SRR530635(1;1),SRR530637(1;1),
chr19	47202743	+	canonical	GACTC(A*)C	A	47202764	-21	expected	1	1	yes	no	yes	0,0,(1)	0,0,(1)	0,0,(1)	0,0,(1)	SRR530638(1;1),
chr19	53309235	+	canonical	TCCTT(A*)C	A	53309268	-33	expected	1	1	yes	no	yes	0,0,(1)	0,0,(1)	0,0,(1)	0,0,(1)	SRR530636(1;1),
chr19	53697516	+	canonical	TGCTT(A*)T	A	53697541	-25	expected	1	1	yes	no	yes	0,0,(1)	0,0,(1)	0,0,(1)	0,0,(1)	SRR530636(1;1),
chr19	53703128	+	canonical	TGCTA(A*)T	A	53703156	-28	expected	2	2	yes	no	yes	0,0,(2)	0,0,(2)	0,0,(2)	0,0,(2)	SRR530636(2;2),
chr2	4914098	-	canonical	CGCTC(A*)C	A	4914069	-29	expected	1	1	no	no	yes	0,1,(0)	0,1,(0)	0,0,(0)	0,0,(0)	SRR530638(1;1),
chr2	5744266	-	canonical	TGCTC(A*)C	A	5744243	-23	expected	1	1	yes	no	yes	0,0,(1)	0,0,(1)	0,0,(1)	0,0,(1)	SRR530636(1;1),
chr2	17310442	-	canonical	AGCTT(A*)C	A	17310411	-31	expected	1	1	yes	no	yes	0,0,(1)	0,0,(1)	0,0,(1)	0,0,(1)	SRR530638(1;1),
chr2	24742625	-	canonical	GGTTG(A*)T	A	24742589	-36	expected	1	1	no	no	yes	1,0,(0)	1,0,(0)	0,0,(0)	0,0,(0)	SRR530636(1;1),
chr2	25066416	-	canonical	TGCGT(A*)C	A	25066392	-24	expected	1	1	yes	no	yes	0,0,(1)	0,0,(1)	0,0,(1)	0,0,(1)	SRR530637(1;1),
chr2	25079770	-	canonical	AGCTA(A*)C	A	25079752	-18	expected	3	3	no	yes	yes	0,1,(2)	0,1,(2)	0,0,(0)	0,0,(0)	SRR530636(3;3),
chr2	26221582	-	canonical	TTCTC(A*)T	A	26221557	-25	expected	6	5	yes	yes	yes	0,0,(6)	0,0,(5)	0,0,(6)	0,0,(5)	SRR530639(1;1),SRR530637(5;4),
chr2	26241151	-	canonical	TACTT(A*)C	A	26241129	-22	expected	2	1	no	no	yes	0,2,(0)	0,1,(0)	0,0,(0)	0,0,(0)	SRR530636(2;1),
chr2	26276995	-	canonical	TAGTC(A*)T	A	26276976	-19	expected	1	1	no	no	yes	0,0,(1)	0,0,(1)	0,0,(0)	0,0,(0)	SRR530635(1;1),
chr2	26282092	-	canonical	TATTC(A*)C	A	26282068	-24	expected	2	1	yes	no	yes	0,0,(2)	0,0,(1)	0,0,(2)	0,0,(1)	SRR530635(2;1),
chr2	26285798	-	canonical	GACTC(A*)C	A	26285771	-27	expected	1	1	yes	no	yes	0,0,(1)	0,0,(1)	0,0,(1)	0,0,(1)	SRR530636(1;1),
chr2	26286766	-	canonical	TACTC(A*)T	A	26286748	-18	expected	2	2	yes	no	yes	0,0,(2)	0,0,(2)	0,0,(2)	0,0,(2)	SRR530635(2;2),
chr2	26333850	-	canonical	AGCTC(A*)C	A	26333823	-27	expected	2	2	no	no	yes	0,0,(2)	0,0,(2)	0,0,(0)	0,0,(0)	SRR530639(2;2),
chr2	26780541	-	canonical	TGCTG(A*)T	A	26780516	-25	expected	2	2	no	no	yes	2,0,(0)	2,0,(0)	0,0,(0)	0,0,(0)	SRR530637(2;2),
chr2	26814110	-	canonical	TGTTA(A*)T	A	26814087	-23	expected	2	1	no	no	yes	2,0,(0)	1,0,(0)	0,0,(0)	0,0,(0)	SRR530638(2;1),
chr2	27312577	-	canonical	TGCTC(A*)C	A	27312557	-20	expected	1	1	no	no	yes	1,0,(0)	1,0,(0)	0,0,(0)	0,0,(0)	SRR530636(1;1),
chr2	32137354	-	canonical	TATTC(A*)T	A	32137330	-24	expected	3	3	yes	no	yes	0,0,(3)	0,0,(3)	0,0,(3)	0,0,(3)	SRR530636(3;3),
chr2	35047115	-	canonical	TAATT(A*)C	A	35047085	-30	expected	1	1	yes	no	yes	0,0,(1)	0,0,(1)	0,0,(1)	0,0,(1)	SRR530637(1;1),
chr2	60146449	-	canonical	CACTT(A*)C	A	60146422	-27	expected	1	1	no	no	yes	0,1,(0)	0,1,(0)	0,0,(0)	0,0,(0)	SRR530635(1;1),
chr2	60601423	-	canonical	GGCTC(A*)C	A	60601399	-24	expected	2	2	yes	no	yes	0,0,(2)	0,0,(2)	0,0,(2)	0,0,(2)	SRR530635(2;2),
chr2	69347459	-	canonical	TTTTC(A*)T	A	69347435	-24	expected	1	1	yes	no	yes	0,0,(1)	0,0,(1)	0,0,(1)	0,0,(1)	SRR530639(1;1),
chr2	90903344	-	canonical	AGCTC(A*)C	A	90903320	-24	expected	1	1	yes	no	yes	0,0,(1)	0,0,(1)	0,0,(1)	0,0,(1)	SRR530636(1;1),
chr2	90978584	-	canonical	GGCTG(A*)T	A	90978558	-26	expected	2	2	yes	yes	yes	0,0,(2)	0,0,(2)	0,0,(2)	0,0,(2)	SRR530633(1;1),SRR530635(1;1),
chr2	91784639	-	canonical	TGCCC(A*)T	A	91784626	-13	expected	1	1	no	no	yes	0,1,(0)	0,1,(0)	0,0,(0)	0,0,(0)	SRR530635(1;1),
chr2	94261703	-	canonical	TACTG(A*)T	A	94261683	-20	expected	2	2	yes	yes	yes	0,0,(2)	0,0,(2)	0,0,(2)	0,0,(2)	SRR530633(1;1),SRR530634(1;1),
chr2	104853134	-	canonical	TCTTA(A*)T	A	104853102	-32	expected	1	1	yes	no	yes	1,0,(0)	1,0,(0)	1,0,(0)	1,0,(0)	SRR530635(1;1),
chr2	120550737	-	canonical	TTCTC(A*)C	A	120550717	-20	expected	1	1	yes	no	yes	0,0,(1)	0,0,(1)	0,0,(1)	0,0,(1)	SRR530634(1;1),
chr2	120551020	-	canonical	TGCTC(A*)C	A	120550999	-21	expected	1	1	yes	no	yes	0,0,(1)	0,0,(1)	0,0,(1)	0,0,(1)	SRR530634(1;1),
chr2	120772151	-	canonical	TCCTC(A*)C	A	120772133	-18	expected	3	3	yes	no	yes	0,0,(3)	0,0,(3)	0,0,(3)	0,0,(3)	SRR530634(3;3),
chr2	130879545	-	canonical	TTCTT(A*)C	A	130879529	-16	expected	1	1	yes	no	yes	0,0,(1)	0,0,(1)	0,0,(1)	0,0,(1)	SRR530636(1;1),
chr2	132384439	-	canonical	TGCAG(A*)C	A	132384418	-21	expected	1	1	yes	no	yes	1,0,(0)	1,0,(0)	1,0,(0)	1,0,(0)	SRR530638(1;1),
chr2	139949449	-	canonical	TGTAC(A*)T	A	139949413	-36	expected	1	1	yes	no	yes	0,0,(1)	0,0,(1)	0,0,(1)	0,0,(1)	SRR530637(1;1),
chr2	152157879	-	canonical	TGCTT(C*)T	C	152157858	-21	expected	1	1	yes	no	yes	0,0,(1)	0,0,(1)	0,0,(1)	0,0,(1)	SRR530640(1;1),
chr2	154704327	-	canonical	TGCTC(A*)T	A	154704300	-27	expected	4	4	yes	yes	yes	1,0,(3)	1,0,(3)	0,0,(3)	0,0,(3)	SRR530636(3;3),SRR530638(1;1),
chr2	155649804	-	canonical	TATTT(A*)T	A	155649776	-28	expected	1	1	yes	no	yes	0,0,(1)	0,0,(1)	0,0,(1)	0,0,(1)	SRR530633(1;1),
chr2	155950087	-	canonical	CACTC(A*)C	A	155950063	-24	expected	1	1	yes	no	yes	0,0,(1)	0,0,(1)	0,0,(1)	0,0,(1)	SRR530637(1;1),
chr2	155987723	-	canonical	TTTTG(A*)C	A	155987701	-22	expected	1	1	yes	no	yes	0,0,(1)	0,0,(1)	0,0,(1)	0,0,(1)	SRR530636(1;1),
chr2	156003148	-	canonical	TCCTC(A*)T	A	156003121	-27	expected	3	3	yes	yes	yes	0,0,(3)	0,0,(3)	0,0,(3)	0,0,(3)	SRR530635(1;1),SRR530636(2;2),
chr2	157953113	-	canonical	TGCTC(A*)T	A	157953090	-23	expected	1	1	yes	no	yes	0,0,(1)	0,0,(1)	0,0,(1)	0,0,(1)	SRR530634(1;1),
chr2	163451349	-	canonical	TACTA(A*)T	A	163451315	-34	expected	5	4	yes	yes	yes	2,0,(3)	2,0,(2)	0,0,(3)	0,0,(2)	SRR530637(2;2),SRR530638(1;1),SRR530636(2;1),
chr2	163456852	-	canonical	TGTTC(A*)T	A	163456831	-21	expected	4	4	yes	yes	yes	0,0,(4)	0,0,(4)	0,0,(4)	0,0,(4)	SRR530635(1;1),SRR530636(1;1),SRR530634(2;2),
chr2	163892437	-	canonical	AACTC(A*)T	A	163892405	-32	expected	2	2	yes	no	yes	0,0,(2)	0,0,(2)	0,0,(2)	0,0,(2)	SRR530638(2;2),
chr2	165123873	-	canonical	AGCTG(A*)T	A	165123843	-30	expected	12	12	yes	yes	yes	1,0,(11)	1,0,(11)	0,0,(11)	0,0,(11)	SRR530639(2;2),SRR530635(2;2),SRR530634(2;2),SRR530636(5;5),SRR530633(1;1),
chr2	165638381	-	canonical	TGCTG(A*)T	A	165638358	-23	expected	1	1	no	no	yes	1,0,(0)	1,0,(0)	0,0,(0)	0,0,(0)	SRR530636(1;1),
chr2	167471709	-	canonical	AGCTG(A*)C	A	167471676	-33	expected	2	2	yes	yes	yes	1,1,(0)	1,1,(0)	0,1,(0)	0,1,(0)	SRR530636(2;2),
chr2	167819157	-	canonical	GGCTC(A*)C	A	167819135	-22	expected	1	1	yes	no	yes	0,0,(1)	0,0,(1)	0,0,(1)	0,0,(1)	SRR530636(1;1),
chr2	179772910	-	canonical	TGCTC(A*)C	A	179772892	-18	expected	1	1	yes	no	yes	0,0,(1)	0,0,(1)	0,0,(1)	0,0,(1)	SRR530635(1;1),
chr2	179995472	-	canonical	CACTC(A*)C	A	179995455	-17	expected	1	1	no	no	yes	0,0,(1)	0,0,(1)	0,0,(0)	0,0,(0)	SRR530635(1;1),
chr2	180990672	-	canonical	CACTC(A*)C	A	180990648	-24	expected	1	1	yes	no	yes	0,0,(1)	0,0,(1)	0,0,(1)	0,0,(1)	SRR530637(1;1),
chr2	14060557	+	canonical	TGATT(A*)C	A	14060582	-25	expected	1	1	yes	no	yes	0,0,(1)	0,0,(1)	0,0,(1)	0,0,(1)	SRR530633(1;1),
chr2	22785247	+	canonical	TACTC(A*)T	A	22785263	-16	expected	1	1	yes	no	yes	0,0,(1)	0,0,(1)	0,0,(1)	0,0,(1)	SRR530634(1;1),
chr2	24916992	+	canonical	GACTC(A*)T	A	24917012	-20	expected	1	1	yes	no	yes	0,0,(1)	0,0,(1)	0,0,(1)	0,0,(1)	SRR530636(1;1),
chr2	26245991	+	canonical	TATTT(A*)C	A	26246014	-23	expected	1	1	yes	no	yes	0,0,(1)	0,0,(1)	0,0,(1)	0,0,(1)	SRR530634(1;1),
chr2	26768155	+	canonical	TGCTT(C*)T	C	26768190	-35	expected	1	1	yes	no	yes	0,0,(1)	0,0,(1)	0,0,(1)	0,0,(1)	SRR530637(1;1),
chr2	26768660	+	canonical	GGCTA(A*)C	A	26768684	-24	expected	1	1	yes	no	yes	0,0,(1)	0,0,(1)	0,0,(1)	0,0,(1)	SRR530640(1;1),
chr2	26772206	+	canonical	TTCTG(A*)C	A	26772224	-18	expected	4	4	yes	yes	yes	0,0,(4)	0,0,(4)	0,0,(4)	0,0,(4)	SRR530637(1;1),SRR530638(3;3),
chr2	28531486	+	canonical	TGTTT(A*)C	A	28531519	-33	expected	1	1	yes	no	yes	0,0,(1)	0,0,(1)	0,0,(1)	0,0,(1)	SRR530636(1;1),
chr2	28716199	+	canonical	TGCTT(A*)C	A	28716235	-36	expected	2	2	yes	no	yes	0,0,(2)	0,0,(2)	0,0,(2)	0,0,(2)	SRR530636(2;2),
chr2	29776275	+	canonical	TGCTC(A*)C	A	29776294	-19	expected	1	1	yes	no	yes	0,0,(1)	0,0,(1)	0,0,(1)	0,0,(1)	SRR530634(1;1),
chr2	29842281	+	canonical	TGCTG(A*)T	A	29842297	-16	expected	1	1	no	no	yes	1,0,(0)	1,0,(0)	0,0,(0)	0,0,(0)	SRR530636(1;1),
chr2	29925678	+	canonical	AGCTA(A*)T	A	29925704	-26	expected	1	1	yes	no	yes	0,0,(1)	0,0,(1)	0,0,(1)	0,0,(1)	SRR530635(1;1),
chr2	30002854	+	canonical	CACTC(A*)C	A	30002881	-27	expected	1	1	yes	no	yes	0,0,(1)	0,0,(1)	0,0,(1)	0,0,(1)	SRR530634(1;1),
chr2	30156508	+	canonical	TGCTC(A*)C	A	30156528	-20	expected	7	7	yes	yes	yes	0,1,(6)	0,1,(6)	0,0,(6)	0,0,(6)	SRR530636(1;1),SRR530634(4;4),SRR530638(2;2),
chr2	30233676	+	canonical	TCCTT(A*)C	A	30233693	-17	expected	1	1	yes	no	yes	0,0,(1)	0,0,(1)	0,0,(1)	0,0,(1)	SRR530636(1;1),
chr2	31634418	+	canonical	TGTTT(A*)C	A	31634440	-22	expected	1	1	no	no	yes	0,0,(1)	0,0,(1)	0,0,(0)	0,0,(0)	SRR530638(1;1),
chr2	31838613	+	canonical	TGGTT(A*)T	A	31838642	-29	expected	1	1	no	no	yes	0,1,(0)	0,1,(0)	0,0,(0)	0,0,(0)	SRR530638(1;1),
chr2	31907617	+	canonical	TGTTG(A*)T	A	31907638	-21	expected	1	1	yes	no	yes	0,0,(1)	0,0,(1)	0,0,(1)	0,0,(1)	SRR530637(1;1),
chr2	32079417	+	canonical	TGTTC(A*)C	A	32079448	-31	expected	1	1	yes	no	yes	0,0,(1)	0,0,(1)	0,0,(1)	0,0,(1)	SRR530636(1;1),
chr2	32086101	+	canonical	TGGTC(A*)C	A	32086130	-29	expected	1	1	yes	no	yes	0,0,(1)	0,0,(1)	0,0,(1)	0,0,(1)	SRR530636(1;1),
chr2	32106286	+	canonical	TGCTC(A*)T	A	32106308	-22	expected	1	1	no	no	yes	1,0,(0)	1,0,(0)	0,0,(0)	0,0,(0)	SRR530633(1;1),
chr2	32818072	+	canonical	TGGTA(A*)C	A	32818093	-21	expected	1	1	yes	no	yes	0,0,(1)	0,0,(1)	0,0,(1)	0,0,(1)	SRR530637(1;1),
chr2	32818486	+	canonical	TGTTC(A*)C	A	32818504	-18	expected	5	5	yes	yes	yes	0,0,(5)	0,0,(5)	0,0,(5)	0,0,(5)	SRR530634(2;2),SRR530636(1;1),SRR530637(2;2),
chr2	34981467	+	canonical	TACTG(A*)T	A	34981495	-28	expected	1	1	no	no	yes	1,0,(0)	1,0,(0)	0,0,(0)	0,0,(0)	SRR530634(1;1),
chr2	69487055	+	canonical	TATAC(A*)C	A	69487078	-23	expected	2	2	yes	no	yes	2,0,(0)	2,0,(0)	2,0,(0)	2,0,(0)	SRR530634(2;2),
chr2	84697417	+	canonical	TCCTG(A*)C	A	84697440	-23	expected	2	2	yes	yes	yes	0,0,(2)	0,0,(2)	0,0,(2)	0,0,(2)	SRR530636(1;1),SRR530635(1;1),
chr2	84790547	+	canonical	TTCTC(A*)C	A	84790577	-30	expected	4	2	yes	yes	yes	0,0,(4)	0,0,(2)	0,0,(4)	0,0,(2)	SRR530636(2;1),SRR530637(2;1),
chr2	84877928	+	canonical	TGCTT(A*)T	A	84877932	-4	proximal	1	1	yes	no	yes	0,0,(1)	0,0,(1)	0,0,(1)	0,0,(1)	SRR530635(1;1),
chr2	91386446	+	canonical	TGTTA(A*)T	A	91386478	-32	expected	1	1	yes	no	yes	0,0,(1)	0,0,(1)	0,0,(1)	0,0,(1)	SRR530635(1;1),
chr2	92215999	+	canonical	CGCTC(A*)C	A	92216027	-28	expected	1	1	no	no	yes	0,0,(1)	0,0,(1)	0,0,(0)	0,0,(0)	SRR530636(1;1),
chr2	119633516	+	canonical	AGCTC(A*)C	A	119633570	-54	expected	1	1	yes	no	yes	0,0,(1)	0,0,(1)	0,0,(1)	0,0,(1)	SRR530638(1;1),
chr2	119847791	+	canonical	TGCTC(A*)C	A	119847825	-34	expected	2	2	yes	yes	yes	0,0,(2)	0,0,(2)	0,0,(2)	0,0,(2)	SRR530635(1;1),SRR530636(1;1),
chr2	121014242	+	canonical	TGTAC(A*)C	A	121014260	-18	expected	1	1	yes	no	yes	1,0,(0)	1,0,(0)	1,0,(0)	1,0,(0)	SRR530636(1;1),
chr2	127062776	+	canonical	TCCTC(A*)C	A	127063196	-420	distal	1	1	yes	no	yes	0,1,(0)	0,1,(0)	0,1,(0)	0,1,(0)	SRR530635(1;1),
chr2	130102680	+	canonical	AGTTG(A*)T	A	130102767	-87	distal	1	1	no	no	yes	0,1,(0)	0,1,(0)	0,0,(0)	0,0,(0)	SRR530634(1;1),
chr2	144420757	+	canonical	TAATA(A*)T	A	144420783	-26	expected	1	1	yes	no	yes	0,0,(1)	0,0,(1)	0,0,(1)	0,0,(1)	SRR530636(1;1),
chr2	145741516	+	canonical	TGCTT(A*)C	A	145741539	-23	expected	3	3	yes	no	yes	0,0,(3)	0,0,(3)	0,0,(3)	0,0,(3)	SRR530637(3;3),
chr2	153017642	+	canonical	TGCTC(A*)C	A	153017665	-23	expected	1	1	no	no	yes	0,1,(0)	0,1,(0)	0,0,(0)	0,0,(0)	SRR530635(1;1),
chr2	153146292	+	canonical	AGCTG(A*)T	A	153146314	-22	expected	5	4	yes	yes	yes	3,0,(2)	2,0,(2)	0,0,(1)	0,0,(1)	SRR530639(1;1),SRR530638(1;1),SRR530637(3;2),
chr2	153223093	+	canonical	AGTTG(A*)T	A	153223111	-18	expected	1	1	yes	no	yes	0,0,(1)	0,0,(1)	0,0,(1)	0,0,(1)	SRR530636(1;1),
chr2	153587535	+	canonical	GGCTA(A*)T	A	153590682	-3147	distal	2	1	no	no	yes	0,2,(0)	0,1,(0)	0,0,(0)	0,0,(0)	SRR530640(2;1),
chr2	153590660	+	canonical	TGCTC(A*)C	A	153590682	-22	expected	1	1	yes	no	yes	0,0,(1)	0,0,(1)	0,0,(1)	0,0,(1)	SRR530633(1;1),
chr2	155034770	+	canonical	TTTTC(A*)T	A	155034794	-24	expected	4	2	yes	yes	yes	0,0,(4)	0,0,(2)	0,0,(4)	0,0,(2)	SRR530638(2;1),SRR530636(2;1),
chr2	157709846	+	canonical	TACCC(A*)C	A	157709868	-22	expected	1	1	no	no	yes	0,0,(1)	0,0,(1)	0,0,(0)	0,0,(0)	SRR530635(1;1),
chr2	157873627	+	canonical	AGCTC(A*)C	A	157873651	-24	expected	1	1	yes	no	yes	0,0,(1)	0,0,(1)	0,0,(1)	0,0,(1)	SRR530635(1;1),
chr2	163441070	+	canonical	TGCTG(A*)C	A	163441098	-28	expected	1	1	no	no	yes	1,0,(0)	1,0,(0)	0,0,(0)	0,0,(0)	SRR530635(1;1),
chr2	164582862	+	canonical	TACTG(A*)C	A	164582889	-27	expected	1	1	no	no	yes	1,0,(0)	1,0,(0)	0,0,(0)	0,0,(0)	SRR530636(1;1),
chr2	166845978	+	canonical	TGCAC(A*)C	A	166845999	-21	expected	1	1	yes	no	yes	1,0,(0)	1,0,(0)	1,0,(0)	1,0,(0)	SRR530633(1;1),
chr2	166854965	+	canonical	CACTG(A*)T	A	166854984	-19	expected	1	1	no	no	yes	1,0,(0)	1,0,(0)	0,0,(0)	0,0,(0)	SRR530636(1;1),
chr2	166889115	+	canonical	TGGTG(A*)T	A	166889135	-20	expected	1	1	yes	no	yes	0,0,(1)	0,0,(1)	0,0,(1)	0,0,(1)	SRR530635(1;1),
chr2	166890632	+	canonical	AGTTG(A*)C	A	166890658	-26	expected	9	8	yes	yes	yes	4,0,(5)	4,0,(4)	0,0,(5)	0,0,(4)	SRR530634(1;1),SRR530635(1;1),SRR530637(3;2),SRR530638(1;1),SRR530633(3;3),
chr2	166890910	+	canonical	TGATA(A*)T	A	166890933	-23	expected	3	3	yes	yes	yes	0,2,(1)	0,2,(1)	0,2,(1)	0,2,(1)	SRR530634(1;1),SRR530637(2;2),
chr2	173920533	+	canonical	TATTG(A*)C	A	173920560	-27	expected	1	1	yes	no	yes	0,0,(1)	0,0,(1)	0,0,(1)	0,0,(1)	SRR530636(1;1),
chr2	179768986	+	canonical	CACTC(A*)C	A	179769002	-16	expected	3	3	yes	yes	yes	0,0,(3)	0,0,(3)	0,0,(3)	0,0,(3)	SRR530634(1;1),SRR530636(2;2),
chr2	180319370	+	canonical	TCCTG(A*)T	A	180319398	-28	expected	1	1	no	no	yes	0,0,(1)	0,0,(1)	0,0,(0)	0,0,(0)	SRR530636(1;1),
chr2	181115061	+	canonical	TGCTG(A*)C	A	181115079	-18	expected	1	1	no	no	yes	1,0,(0)	1,0,(0)	0,0,(0)	0,0,(0)	SRR530636(1;1),
chr3	14766677	-	canonical	TTTTC(A*)C	A	14766652	-25	expected	1	1	no	no	yes	0,0,(1)	0,0,(1)	0,0,(0)	0,0,(0)	SRR530634(1;1),
chr3	14776358	-	canonical	GGCTG(A*)C	A	14776336	-22	expected	5	4	yes	yes	yes	3,0,(2)	3,0,(1)	0,0,(2)	0,0,(1)	SRR530634(1;1),SRR530636(3;2),SRR530633(1;1),
chr3	19136564	-	canonical	TACTA(A*)T	A	19136539	-25	expected	1	1	no	no	yes	0,0,(1)	0,0,(1)	0,0,(0)	0,0,(0)	SRR530638(1;1),
chr3	27036105	-	canonical	TTCTG(A*)T	A	27036083	-22	expected	1	1	yes	no	yes	0,0,(1)	0,0,(1)	0,0,(1)	0,0,(1)	SRR530636(1;1),
chr3	54533250	-	canonical	TGCCC(A*)C	A	54533222	-28	expected	1	1	no	no	yes	0,1,(0)	0,1,(0)	0,0,(0)	0,0,(0)	SRR530637(1;1),
chr3	78892045	-	canonical	TAGTA(A*)C	A	78892007	-38	expected	2	2	yes	yes	yes	0,1,(1)	0,1,(1)	0,1,(1)	0,1,(1)	SRR530636(2;2),
chr3	79413918	-	canonical	AGCTG(A*)C	A	79413889	-29	expected	1	1	no	no	yes	1,0,(0)	1,0,(0)	0,0,(0)	0,0,(0)	SRR530640(1;1),
chr3	88286048	-	canonical	TGCTC(A*)C	A	88286022	-26	expected	15	15	yes	yes	yes	0,1,(14)	0,1,(14)	0,0,(13)	0,0,(13)	SRR530636(9;9),SRR530634(4;4),SRR530635(2;2),
chr3	89748138	-	canonical	TGCTC(A*)C	A	89748114	-24	expected	1	1	yes	no	yes	0,0,(1)	0,0,(1)	0,0,(1)	0,0,(1)	SRR530638(1;1),
chr3	89825460	-	canonical	GGCTC(A*)T	A	89825438	-22	expected	4	4	yes	yes	yes	0,0,(4)	0,0,(4)	0,0,(2)	0,0,(2)	SRR530634(2;2),SRR530635(2;2),
chr3	95584533	-	canonical	TATAA(A*)T	A	95584513	-20	expected	2	2	yes	no	yes	0,0,(2)	0,0,(2)	0,0,(2)	0,0,(2)	SRR530634(2;2),
chr3	96384451	-	canonical	TGCTG(A*)T	A	96384429	-22	expected	2	1	no	no	yes	2,0,(0)	1,0,(0)	0,0,(0)	0,0,(0)	SRR530636(2;1),
chr3	96384858	-	canonical	AACTC(A*)C	A	96384826	-32	expected	1	1	yes	no	yes	0,0,(1)	0,0,(1)	0,0,(1)	0,0,(1)	SRR530635(1;1),
chr3	96693929	-	canonical	CACTC(A*)T	A	96693912	-17	expected	1	1	yes	no	yes	0,0,(1)	0,0,(1)	0,0,(1)	0,0,(1)	SRR530634(1;1),
chr3	105486240	-	canonical	TGTTC(A*)T	A	105486213	-27	expected	2	1	yes	no	yes	0,0,(2)	0,0,(1)	0,0,(2)	0,0,(1)	SRR530639(2;1),
chr3	105761838	-	canonical	TGCTA(A*)C	A	105761816	-22	expected	1	1	no	no	yes	1,0,(0)	1,0,(0)	0,0,(0)	0,0,(0)	SRR530636(1;1),
chr3	107428685	-	canonical	AGCTG(A*)T	A	107428667	-18	expected	1	1	no	no	yes	1,0,(0)	1,0,(0)	0,0,(0)	0,0,(0)	SRR530635(1;1),
chr3	107471679	-	canonical	TGCTT(A*)T	A	107471655	-24	expected	2	1	no	no	yes	0,0,(2)	0,0,(1)	0,0,(0)	0,0,(0)	SRR530638(2;1),
chr3	107474187	-	canonical	TGCCC(A*)T	A	107474162	-25	expected	2	2	yes	yes	yes	0,0,(2)	0,0,(2)	0,0,(2)	0,0,(2)	SRR530635(1;1),SRR530633(1;1),
chr3	107882287	-	canonical	TGCTG(G*)C	G	107882244	-43	expected	1	1	no	no	yes	0,1,(0)	0,1,(0)	0,0,(0)	0,0,(0)	SRR530633(1;1),
chr3	116000123	-	canonical	TGATA(A*)C	A	116000096	-27	expected	2	2	yes	yes	yes	0,1,(1)	0,1,(1)	0,1,(1)	0,1,(1)	SRR530633(1;1),SRR530637(1;1),
chr3	130433099	-	canonical	TGCGT(A*)C	A	130432220	-879	distal	2	2	no	yes	yes	2,0,(0)	2,0,(0)	0,0,(0)	0,0,(0)	SRR530634(1;1),SRR530636(1;1),
chr3	132745489	-	canonical	TGCTC(A*)C	A	132745470	-19	expected	1	1	yes	no	yes	0,0,(1)	0,0,(1)	0,0,(1)	0,0,(1)	SRR530638(1;1),
chr3	138138059	-	canonical	TACTC(A*)C	A	138138042	-17	expected	1	1	yes	no	yes	0,0,(1)	0,0,(1)	0,0,(1)	0,0,(1)	SRR530633(1;1),
chr3	151948324	-	canonical	TACTC(A*)C	A	151948300	-24	expected	2	1	yes	no	yes	0,0,(2)	0,0,(1)	0,0,(2)	0,0,(1)	SRR530638(2;1),
chr3	157576738	-	canonical	TGTAT(A*)T	A	157576695	-43	expected	1	1	yes	no	yes	0,0,(1)	0,0,(1)	0,0,(1)	0,0,(1)	SRR530638(1;1),
chr3	14539598	+	canonical	TATTT(A*)T	A	14539628	-30	expected	2	2	yes	no	yes	0,0,(2)	0,0,(2)	0,0,(2)	0,0,(2)	SRR530635(2;2),
chr3	19118997	+	canonical	TGCTG(A*)C	A	19119037	-40	expected	1	1	no	no	yes	1,0,(0)	1,0,(0)	0,0,(0)	0,0,(0)	SRR530639(1;1),
chr3	22102719	+	canonical	TGCTT(A*)T	A	22102748	-29	expected	3	3	yes	yes	yes	0,1,(2)	0,1,(2)	0,0,(2)	0,0,(2)	SRR530637(1;1),SRR530640(2;2),
chr3	33706200	+	canonical	TACTG(A*)T	A	33706760	-560	distal	1	1	yes	no	yes	0,0,(1)	0,0,(1)	0,0,(1)	0,0,(1)	SRR530639(1;1),
chr3	41413696	+	canonical	TGCTC(A*)C	A	41413724	-28	expected	1	1	yes	no	yes	0,0,(1)	0,0,(1)	0,0,(1)	0,0,(1)	SRR530636(1;1),
chr3	41417013	+	canonical	TGCTT(A*)T	A	41417044	-31	expected	1	1	yes	no	yes	0,0,(1)	0,0,(1)	0,0,(1)	0,0,(1)	SRR530634(1;1),
chr3	62145231	+	canonical	TATTC(A*)C	A	62145265	-34	expected	1	1	yes	no	yes	0,0,(1)	0,0,(1)	0,0,(1)	0,0,(1)	SRR530639(1;1),
chr3	63818140	+	canonical	TTCTC(A*)C	A	63818175	-35	expected	1	1	no	no	yes	0,0,(1)	0,0,(1)	0,0,(0)	0,0,(0)	SRR530637(1;1),
chr3	86129597	+	canonical	TGCTA(A*)T	A	86129622	-25	expected	1	1	yes	no	yes	1,0,(0)	1,0,(0)	1,0,(0)	1,0,(0)	SRR530635(1;1),
chr3	87716986	+	canonical	TGCTC(A*)C	A	87717012	-26	expected	1	1	yes	no	yes	0,0,(1)	0,0,(1)	0,0,(1)	0,0,(1)	SRR530636(1;1),
chr3	87966859	+	canonical	TCTTG(A*)C	A	87966879	-20	expected	1	1	yes	no	yes	0,0,(1)	0,0,(1)	0,0,(1)	0,0,(1)	SRR530637(1;1),
chr3	88117455	+	canonical	AGCTG(A*)C	A	88117477	-22	expected	1	1	no	no	yes	1,0,(0)	1,0,(0)	0,0,(0)	0,0,(0)	SRR530637(1;1),
chr3	88156852	+	canonical	TGTTA(G*)C	G	88156884	-32	expected	1	1	no	no	yes	0,1,(0)	0,1,(0)	0,0,(0)	0,0,(0)	SRR530633(1;1),
chr3	88447049	+	canonical	TGCTC(C*)T	C	88447070	-21	expected	1	1	no	no	yes	1,0,(0)	1,0,(0)	0,0,(0)	0,0,(0)	SRR530635(1;1),
chr3	88447240	+	canonical	TGCTG(A*)C	A	88447266	-26	expected	3	2	yes	yes	yes	0,0,(3)	0,0,(2)	0,0,(3)	0,0,(2)	SRR530635(1;1),SRR530636(2;1),
chr3	88493522	+	canonical	TTTTA(A*)T	A	88493545	-23	expected	1	1	yes	no	yes	0,0,(1)	0,0,(1)	0,0,(1)	0,0,(1)	SRR530636(1;1),
chr3	89891353	+	canonical	TGTTC(A*)T	A	89891376	-23	expected	2	2	yes	yes	yes	0,0,(2)	0,0,(2)	0,0,(2)	0,0,(2)	SRR530636(1;1),SRR530633(1;1),
chr3	90291116	+	canonical	TATTT(A*)T	A	90291148	-32	expected	1	1	yes	no	yes	0,0,(1)	0,0,(1)	0,0,(1)	0,0,(1)	SRR530639(1;1),
chr3	90291126	+	canonical	GGCTC(A*)T	A	90291148	-22	expected	6	6	yes	yes	yes	2,0,(4)	2,0,(4)	0,0,(1)	0,0,(1)	SRR530637(1;1),SRR530633(2;2),SRR530636(3;3),
chr3	94247558	+	canonical	CGCTC(A*)C	A	94247580	-22	expected	1	1	yes	no	yes	0,0,(1)	0,0,(1)	0,0,(1)	0,0,(1)	SRR530636(1;1),
chr3	95094918	+	canonical	AGCTC(A*)C	A	95094943	-25	expected	1	1	yes	no	yes	0,0,(1)	0,0,(1)	0,0,(1)	0,0,(1)	SRR530635(1;1),
chr3	95126020	+	canonical	TGATA(A*)T	A	95126048	-28	expected	1	1	yes	no	yes	0,1,(0)	0,1,(0)	0,1,(0)	0,1,(0)	SRR530636(1;1),
chr3	95748209	+	canonical	TACTC(A*)T	A	95748229	-20	expected	3	3	yes	yes	yes	0,0,(3)	0,0,(3)	0,0,(3)	0,0,(3)	SRR530635(1;1),SRR530637(2;2),
chr3	96363484	+	canonical	TATTC(A*)T	A	96363511	-27	expected	2	1	yes	no	yes	0,0,(2)	0,0,(1)	0,0,(2)	0,0,(1)	SRR530636(2;1),
chr3	100731130	+	canonical	TACTT(A*)C	A	100731147	-17	expected	1	1	no	no	yes	0,0,(1)	0,0,(1)	0,0,(0)	0,0,(0)	SRR530635(1;1),
chr3	102856714	+	canonical	TAATT(A*)T	A	102856734	-20	expected	1	1	yes	no	yes	0,0,(1)	0,0,(1)	0,0,(1)	0,0,(1)	SRR530637(1;1),
chr3	102864106	+	canonical	TCCTC(A*)C	A	102864123	-17	expected	1	1	yes	no	yes	0,0,(1)	0,0,(1)	0,0,(1)	0,0,(1)	SRR530636(1;1),
chr3	116313156	+	canonical	TCCTA(A*)T	A	116313181	-25	expected	1	1	yes	no	yes	0,1,(0)	0,1,(0)	0,1,(0)	0,1,(0)	SRR530637(1;1),
chr3	116324275	+	canonical	TTCTT(A*)T	A	116324300	-25	expected	1	1	yes	no	yes	0,0,(1)	0,0,(1)	0,0,(1)	0,0,(1)	SRR530636(1;1),
chr3	121962102	+	canonical	TGTTC(A*)T	A	121962124	-22	expected	1	1	yes	no	yes	0,0,(1)	0,0,(1)	0,0,(1)	0,0,(1)	SRR530635(1;1),
chr3	126541157	+	canonical	TTCTC(A*)T	A	126541180	-23	expected	1	1	yes	no	yes	0,0,(1)	0,0,(1)	0,0,(1)	0,0,(1)	SRR530638(1;1),
chr3	134880189	+	canonical	TTCTG(A*)T	A	134880216	-27	expected	1	1	yes	no	yes	0,0,(1)	0,0,(1)	0,0,(1)	0,0,(1)	SRR530637(1;1),
chr3	134922130	+	canonical	TGCTC(A*)C	A	134922155	-25	expected	3	2	yes	no	yes	0,0,(3)	0,0,(2)	0,0,(3)	0,0,(2)	SRR530636(3;2),
chr3	137528417	+	canonical	TCTTA(A*)C	A	137528483	-66	distal	1	1	no	no	yes	1,0,(0)	1,0,(0)	0,0,(0)	0,0,(0)	SRR530639(1;1),
chr3	137813325	+	canonical	AACTG(A*)C	A	137813366	-41	expected	4	4	yes	yes	yes	0,2,(2)	0,2,(2)	0,2,(2)	0,2,(2)	SRR530635(1;1),SRR530637(3;3),
chr3	151889011	+	canonical	TATTA(A*)C	A	151889043	-32	expected	2	1	no	no	yes	0,2,(0)	0,1,(0)	0,0,(0)	0,0,(0)	SRR530634(2;1),
chr4	15851524	-	canonical	TGCTG(A*)T	A	15851500	-24	expected	1	1	no	no	yes	1,0,(0)	1,0,(0)	0,0,(0)	0,0,(0)	SRR530637(1;1),
chr4	25189497	-	canonical	TGCCT(A*)C	A	25189473	-24	expected	1	1	yes	no	yes	0,1,(0)	0,1,(0)	0,1,(0)	0,1,(0)	SRR530636(1;1),
chr4	34532155	-	canonical	TTCTC(A*)T	A	34532132	-23	expected	1	1	yes	no	yes	0,0,(1)	0,0,(1)	0,0,(1)	0,0,(1)	SRR530636(1;1),
chr4	40210136	-	canonical	TACTG(A*)T	A	40210114	-22	expected	1	1	yes	no	yes	0,0,(1)	0,0,(1)	0,0,(1)	0,0,(1)	SRR530634(1;1),
chr4	40893352	-	canonical	TGCTC(A*)T	A	40893330	-22	expected	1	1	yes	no	yes	0,0,(1)	0,0,(1)	0,0,(1)	0,0,(1)	SRR530636(1;1),
chr4	41154167	-	canonical	TACTC(A*)T	A	41154137	-30	expected	1	1	yes	no	yes	0,0,(1)	0,0,(1)	0,0,(1)	0,0,(1)	SRR530635(1;1),
chr4	41340030	-	canonical	TGTTC(A*)T	A	41340004	-26	expected	1	1	yes	no	yes	0,0,(1)	0,0,(1)	0,0,(1)	0,0,(1)	SRR530636(1;1),
chr4	43003799	-	canonical	TGCTG(A*)C	A	43003749	-50	expected	1	1	no	no	yes	1,0,(0)	1,0,(0)	0,0,(0)	0,0,(0)	SRR530637(1;1),
chr4	48465874	-	canonical	TGATA(A*)T	A	48465853	-21	expected	1	1	no	no	yes	1,0,(0)	1,0,(0)	0,0,(0)	0,0,(0)	SRR530634(1;1),
chr4	53053715	-	canonical	CGCTC(A*)C	A	53053697	-18	expected	1	1	yes	no	yes	0,0,(1)	0,0,(1)	0,0,(1)	0,0,(1)	SRR530636(1;1),
chr4	53102841	-	canonical	TGTTC(A*)T	A	53102787	-54	expected	1	1	yes	no	yes	0,0,(1)	0,0,(1)	0,0,(1)	0,0,(1)	SRR530633(1;1),
chr4	56848277	-	canonical	TACTC(A*)C	A	56848250	-27	expected	1	1	yes	no	yes	0,0,(1)	0,0,(1)	0,0,(1)	0,0,(1)	SRR530633(1;1),
chr4	62170379	-	canonical	AGCTG(A*)T	A	62170344	-35	expected	1	1	no	no	yes	1,0,(0)	1,0,(0)	0,0,(0)	0,0,(0)	SRR530633(1;1),
chr4	82886124	-	canonical	TGCTC(A*)C	A	82886098	-26	expected	1	1	yes	no	yes	0,0,(1)	0,0,(1)	0,0,(1)	0,0,(1)	SRR530638(1;1),
chr4	82906886	-	canonical	TGCTG(A*)T	A	82906862	-24	expected	1	1	no	no	yes	1,0,(0)	1,0,(0)	0,0,(0)	0,0,(0)	SRR530640(1;1),
chr4	87420079	-	canonical	TGCTT(A*)C	A	87420050	-29	expected	1	1	yes	no	yes	0,0,(1)	0,0,(1)	0,0,(1)	0,0,(1)	SRR530636(1;1),
chr4	106119406	-	canonical	TTCTC(A*)C	A	106119378	-28	expected	2	2	yes	no	yes	0,0,(2)	0,0,(2)	0,0,(2)	0,0,(2)	SRR530634(2;2),
chr4	106343163	-	canonical	AGCTG(A*)C	A	106343140	-23	expected	1	1	no	no	yes	1,0,(0)	1,0,(0)	0,0,(0)	0,0,(0)	SRR530633(1;1),
chr4	108735232	-	canonical	AGCTC(A*)C	A	108735205	-27	expected	1	1	yes	no	yes	0,0,(1)	0,0,(1)	0,0,(1)	0,0,(1)	SRR530635(1;1),
chr4	116276990	-	canonical	TGTTA(A*)C	A	116276956	-34	expected	1	1	no	no	yes	1,0,(0)	1,0,(0)	0,0,(0)	0,0,(0)	SRR530634(1;1),
chr4	116827742	-	canonical	TGATG(A*)C	A	116827712	-30	expected	3	3	no	yes	yes	3,0,(0)	3,0,(0)	0,0,(0)	0,0,(0)	SRR530636(1;1),SRR530633(1;1),SRR530637(1;1),
chr4	117573687	-	canonical	TGCTG(A*)C	A	117573660	-27	expected	5	4	yes	no	yes	0,0,(5)	0,0,(4)	0,0,(5)	0,0,(4)	SRR530636(5;4),
chr4	118056615	-	canonical	AGCTC(A*)C	A	118056595	-20	expected	1	1	no	no	yes	0,1,(0)	0,1,(0)	0,0,(0)	0,0,(0)	SRR530637(1;1),
chr4	118062777	-	canonical	TCCTC(A*)T	A	118062741	-36	expected	1	1	yes	no	yes	0,0,(1)	0,0,(1)	0,0,(1)	0,0,(1)	SRR530634(1;1),
chr4	118854029	-	canonical	TGCTC(A*)C	A	118853991	-38	expected	2	2	yes	yes	yes	1,0,(1)	1,0,(1)	0,0,(1)	0,0,(1)	SRR530635(1;1),SRR530636(1;1),
chr4	118860351	-	canonical	AACTC(A*)T	A	118860324	-27	expected	1	1	no	no	yes	1,0,(0)	1,0,(0)	0,0,(0)	0,0,(0)	SRR530634(1;1),
chr4	125911787	-	canonical	TACTA(A*)C	A	125911762	-25	expected	1	1	yes	no	yes	0,0,(1)	0,0,(1)	0,0,(1)	0,0,(1)	SRR530635(1;1),
chr4	129193902	-	canonical	TTCTC(A*)T	A	129193880	-22	expected	2	2	yes	yes	yes	0,0,(2)	0,0,(2)	0,0,(2)	0,0,(2)	SRR530637(1;1),SRR530638(1;1),
chr4	129308627	-	canonical	TTCTG(A*)C	A	129308598	-29	expected	1	1	yes	no	yes	0,0,(1)	0,0,(1)	0,0,(1)	0,0,(1)	SRR530636(1;1),
chr4	129390714	-	canonical	TATTC(A*)T	A	129390692	-22	expected	1	1	yes	no	yes	0,0,(1)	0,0,(1)	0,0,(1)	0,0,(1)	SRR530636(1;1),
chr4	131766765	-	canonical	TGCTA(A*)T	A	131766746	-19	expected	1	1	yes	no	yes	0,1,(0)	0,1,(0)	0,1,(0)	0,1,(0)	SRR530636(1;1),
chr4	131908632	-	canonical	TACTG(A*)T	A	131908613	-19	expected	2	2	no	yes	yes	2,0,(0)	2,0,(0)	0,0,(0)	0,0,(0)	SRR530634(1;1),SRR530636(1;1),
chr4	134884986	-	canonical	TCTTG(A*)C	A	134884960	-26	expected	1	1	yes	no	yes	0,0,(1)	0,0,(1)	0,0,(1)	0,0,(1)	SRR530636(1;1),
chr4	135565810	-	canonical	TGATT(A*)C	A	135565779	-31	expected	1	1	yes	no	yes	0,0,(1)	0,0,(1)	0,0,(1)	0,0,(1)	SRR530638(1;1),
chr4	138905022	-	canonical	GGCTC(A*)C	A	138905002	-20	expected	3	3	yes	yes	yes	0,0,(3)	0,0,(3)	0,0,(3)	0,0,(3)	SRR530637(2;2),SRR530634(1;1),
chr4	144678368	-	canonical	GGCTG(A*)T	A	144678341	-27	expected	1	1	yes	no	yes	0,0,(1)	0,0,(1)	0,0,(1)	0,0,(1)	SRR530635(1;1),
chr4	147257116	-	canonical	TTCTC(A*)T	A	147257092	-24	expected	1	1	yes	no	yes	0,0,(1)	0,0,(1)	0,0,(1)	0,0,(1)	SRR530635(1;1),
chr4	147272773	-	canonical	TGCTC(A*)C	A	147272751	-22	expected	1	1	yes	no	yes	0,0,(1)	0,0,(1)	0,0,(1)	0,0,(1)	SRR530638(1;1),
chr4	147530418	-	canonical	TCTTC(A*)C	A	147530390	-28	expected	1	1	yes	no	yes	0,0,(1)	0,0,(1)	0,0,(1)	0,0,(1)	SRR530636(1;1),
chr4	149029091	-	canonical	TGTAG(A*)C	A	149029068	-23	expected	1	1	no	no	yes	1,0,(0)	1,0,(0)	0,0,(0)	0,0,(0)	SRR530638(1;1),
chr4	150392202	-	canonical	TTTTC(A*)C	A	150392175	-27	expected	1	1	yes	no	yes	0,0,(1)	0,0,(1)	0,0,(1)	0,0,(1)	SRR530636(1;1),
chr4	151357478	-	canonical	CACTC(A*)C	A	151357461	-17	expected	1	1	yes	no	yes	0,0,(1)	0,0,(1)	0,0,(1)	0,0,(1)	SRR530637(1;1),
chr4	153324320	-	canonical	TGCTA(A*)C	A	153324295	-25	expected	1	1	yes	no	yes	0,0,(1)	0,0,(1)	0,0,(1)	0,0,(1)	SRR530636(1;1),
chr4	155545155	-	canonical	GACTG(A*)C	A	155545139	-16	expected	1	1	yes	no	yes	0,0,(1)	0,0,(1)	0,0,(1)	0,0,(1)	SRR530635(1;1),
chr4	6129419	+	canonical	TATTT(A*)T	A	6129438	-19	expected	1	1	no	no	yes	0,1,(0)	0,1,(0)	0,0,(0)	0,0,(0)	SRR530634(1;1),
chr4	11473092	+	canonical	TTCTC(A*)T	A	11473115	-23	expected	1	1	yes	no	yes	0,0,(1)	0,0,(1)	0,0,(1)	0,0,(1)	SRR530634(1;1),
chr4	15892254	+	canonical	TATTT(A*)T	A	15892280	-26	expected	2	2	yes	no	yes	0,0,(2)	0,0,(2)	0,0,(2)	0,0,(2)	SRR530636(2;2),
chr4	28874666	+	canonical	TTCTT(A*)C	A	28874677	-11	expected	1	1	no	no	yes	0,0,(1)	0,0,(1)	0,0,(0)	0,0,(0)	SRR530640(1;1),
chr4	32810431	+	canonical	TGCTA(A*)C	A	32810455	-24	expected	1	1	yes	no	yes	0,0,(1)	0,0,(1)	0,0,(1)	0,0,(1)	SRR530633(1;1),
chr4	32817703	+	canonical	TTCTA(A*)T	A	32817730	-27	expected	2	2	no	yes	yes	2,0,(0)	2,0,(0)	0,0,(0)	0,0,(0)	SRR530634(1;1),SRR530636(1;1),
chr4	32827322	+	canonical	TACCC(A*)C	A	32827353	-31	expected	1	1	yes	no	yes	0,0,(1)	0,0,(1)	0,0,(1)	0,0,(1)	SRR530635(1;1),
chr4	33132022	+	canonical	TTCTT(A*)T	A	33132054	-32	expected	1	1	yes	no	yes	0,0,(1)	0,0,(1)	0,0,(1)	0,0,(1)	SRR530636(1;1),
chr4	40670982	+	canonical	TTCTA(A*)T	A	40671005	-23	expected	3	3	yes	yes	yes	0,2,(1)	0,2,(1)	0,0,(1)	0,0,(1)	SRR530634(1;1),SRR530636(2;2),
chr4	40971812	+	canonical	GGCTC(A*)T	A	40971833	-21	expected	1	1	no	no	yes	0,0,(1)	0,0,(1)	0,0,(0)	0,0,(0)	SRR530636(1;1),
chr4	43257552	+	canonical	TCTTC(A*)C	A	43257573	-21	expected	1	1	yes	no	yes	0,0,(1)	0,0,(1)	0,0,(1)	0,0,(1)	SRR530636(1;1),
chr4	45040863	+	canonical	TCTTG(A*)C	A	45040874	-11	expected	1	1	no	no	yes	1,0,(0)	1,0,(0)	0,0,(0)	0,0,(0)	SRR530635(1;1),
chr4	46181289	+	canonical	TGTTT(A*)C	A	46181322	-33	expected	2	2	yes	no	yes	0,0,(2)	0,0,(2)	0,0,(2)	0,0,(2)	SRR530636(2;2),
chr4	52480643	+	canonical	TACTT(A*)T	A	52480661	-18	expected	4	2	no	no	yes	0,4,(0)	0,2,(0)	0,0,(0)	0,0,(0)	SRR530636(4;2),
chr4	62083428	+	canonical	TATTC(A*)T	A	62083448	-20	expected	2	2	yes	no	yes	0,0,(2)	0,0,(2)	0,0,(2)	0,0,(2)	SRR530633(2;2),
chr4	86473839	+	canonical	TACTT(A*)T	A	86473871	-32	expected	1	1	no	no	yes	0,1,(0)	0,1,(0)	0,0,(0)	0,0,(0)	SRR530636(1;1),
chr4	87982046	+	canonical	AGCTC(A*)T	A	87982071	-25	expected	2	1	yes	no	yes	0,0,(2)	0,0,(1)	0,0,(2)	0,0,(1)	SRR530634(2;1),
chr4	94520031	+	canonical	TCCTG(A*)C	A	94520059	-28	expected	1	1	yes	no	yes	0,0,(1)	0,0,(1)	0,0,(1)	0,0,(1)	SRR530636(1;1),
chr4	102274120	+	canonical	TGATC(A*)T	A	102274137	-17	expected	1	1	yes	no	yes	0,0,(1)	0,0,(1)	0,0,(1)	0,0,(1)	SRR530637(1;1),
chr4	106041296	+	canonical	TTCTC(A*)T	A	106041327	-31	expected	1	1	no	no	yes	0,0,(1)	0,0,(1)	0,0,(0)	0,0,(0)	SRR530633(1;1),
chr4	107475836	+	canonical	AGCTC(A*)C	A	107475855	-19	expected	1	1	yes	no	yes	0,0,(1)	0,0,(1)	0,0,(1)	0,0,(1)	SRR530633(1;1),
chr4	116265372	+	canonical	TAGTC(A*)T	A	116265410	-38	expected	1	1	yes	no	yes	0,0,(1)	0,0,(1)	0,0,(1)	0,0,(1)	SRR530636(1;1),
chr4	122726377	+	canonical	TGCTG(A*)C	A	122726394	-17	expected	1	1	yes	no	yes	0,0,(1)	0,0,(1)	0,0,(1)	0,0,(1)	SRR530635(1;1),
chr4	122968950	+	canonical	TCTTC(A*)T	A	122968975	-25	expected	2	1	yes	no	yes	0,0,(2)	0,0,(1)	0,0,(2)	0,0,(1)	SRR530634(2;1),
chr4	122975729	+	canonical	TGCTT(A*)T	A	122975755	-26	expected	1	1	yes	no	yes	0,0,(1)	0,0,(1)	0,0,(1)	0,0,(1)	SRR530634(1;1),
chr4	124409412	+	canonical	AGCTA(A*)C	A	124409431	-19	expected	3	3	yes	yes	yes	0,0,(3)	0,0,(3)	0,0,(3)	0,0,(3)	SRR530637(2;2),SRR530634(1;1),
chr4	124749882	+	canonical	TGCTC(A*)C	A	124749909	-27	expected	1	1	yes	no	yes	0,0,(1)	0,0,(1)	0,0,(1)	0,0,(1)	SRR530639(1;1),
chr4	128761112	+	canonical	TGCTG(G*)T	G	128762793	-1681	distal	3	3	no	yes	yes	1,2,(0)	1,2,(0)	0,0,(0)	0,0,(0)	SRR530638(1;1),SRR530635(1;1),SRR530634(1;1),
chr4	129018952	+	canonical	TACTA(A*)T	A	129018984	-32	expected	2	1	yes	no	yes	0,0,(2)	0,0,(1)	0,0,(2)	0,0,(1)	SRR530636(2;1),
chr4	130055270	+	canonical	TACTT(A*)C	A	130055292	-22	expected	1	1	yes	no	yes	0,0,(1)	0,0,(1)	0,0,(1)	0,0,(1)	SRR530637(1;1),
chr4	130309830	+	canonical	TGCTT(A*)T	A	130309856	-26	expected	2	2	yes	yes	yes	0,0,(2)	0,0,(2)	0,0,(2)	0,0,(2)	SRR530636(1;1),SRR530633(1;1),
chr4	130335671	+	canonical	TACCC(A*)C	A	130335686	-15	expected	1	1	yes	no	yes	0,0,(1)	0,0,(1)	0,0,(1)	0,0,(1)	SRR530640(1;1),
chr4	131456158	+	canonical	TACTC(A*)C	A	131456179	-21	expected	1	1	no	no	yes	0,0,(1)	0,0,(1)	0,0,(0)	0,0,(0)	SRR530636(1;1),
chr4	131866044	+	canonical	TATTT(A*)C	A	131866065	-21	expected	1	1	yes	no	yes	0,0,(1)	0,0,(1)	0,0,(1)	0,0,(1)	SRR530633(1;1),
chr4	131866341	+	canonical	GGCTT(A*)C	A	131866365	-24	expected	1	1	yes	no	yes	0,0,(1)	0,0,(1)	0,0,(1)	0,0,(1)	SRR530636(1;1),
chr4	131866724	+	canonical	AACTA(A*)C	A	131866748	-24	expected	1	1	yes	no	yes	0,0,(1)	0,0,(1)	0,0,(1)	0,0,(1)	SRR530634(1;1),
chr4	137077923	+	canonical	TGCAC(A*)C	A	137077947	-24	expected	1	1	yes	no	yes	0,0,(1)	0,0,(1)	0,0,(1)	0,0,(1)	SRR530640(1;1),
chr4	137176945	+	canonical	TAGTT(A*)C	A	137176976	-31	expected	1	1	yes	no	yes	0,0,(1)	0,0,(1)	0,0,(1)	0,0,(1)	SRR530636(1;1),
chr4	137861043	+	canonical	TCCTG(A*)C	A	137861069	-26	expected	1	1	yes	no	yes	0,0,(1)	0,0,(1)	0,0,(1)	0,0,(1)	SRR530637(1;1),
chr4	138931243	+	canonical	TTCTC(A*)T	A	138931260	-17	expected	1	1	yes	no	yes	0,0,(1)	0,0,(1)	0,0,(1)	0,0,(1)	SRR530635(1;1),
chr4	138997087	+	canonical	TGTTC(A*)C	A	138997106	-19	expected	1	1	yes	no	yes	0,0,(1)	0,0,(1)	0,0,(1)	0,0,(1)	SRR530635(1;1),
chr4	147923450	+	canonical	TCCTG(A*)C	A	147923476	-26	expected	1	1	yes	no	yes	0,0,(1)	0,0,(1)	0,0,(1)	0,0,(1)	SRR530637(1;1),
chr4	148481856	+	canonical	AGCTG(A*)C	A	148481877	-21	expected	1	1	no	no	yes	1,0,(0)	1,0,(0)	0,0,(0)	0,0,(0)	SRR530635(1;1),
chr4	149618329	+	canonical	TGCTC(A*)C	A	149618349	-20	expected	3	3	yes	yes	yes	0,1,(2)	0,1,(2)	0,0,(2)	0,0,(2)	SRR530638(1;1),SRR530637(1;1),SRR530636(1;1),
chr4	155382877	+	canonical	TAGTC(A*)C	A	155382895	-18	expected	1	1	yes	no	yes	0,0,(1)	0,0,(1)	0,0,(1)	0,0,(1)	SRR530636(1;1),
chr5	8408334	-	canonical	TGCTA(A*)C	A	8408310	-24	expected	1	1	yes	no	yes	0,0,(1)	0,0,(1)	0,0,(1)	0,0,(1)	SRR530635(1;1),
chr5	24801454	-	canonical	TACTT(A*)C	A	24801428	-26	expected	1	1	no	no	yes	0,0,(1)	0,0,(1)	0,0,(0)	0,0,(0)	SRR530635(1;1),
chr5	24853326	-	canonical	TATTT(A*)T	A	24853298	-28	expected	1	1	yes	no	yes	0,0,(1)	0,0,(1)	0,0,(1)	0,0,(1)	SRR530636(1;1),
chr5	24910233	-	canonical	TGTTT(A*)T	A	24910206	-27	expected	1	1	no	no	yes	0,0,(1)	0,0,(1)	0,0,(0)	0,0,(0)	SRR530636(1;1),
chr5	28108061	-	canonical	TGCTC(A*)C	A	28108025	-36	expected	4	2	yes	no	yes	0,0,(4)	0,0,(2)	0,0,(4)	0,0,(2)	SRR530637(4;2),
chr5	31339610	-	canonical	TCCTA(A*)C	A	31339591	-19	expected	1	1	yes	no	yes	0,1,(0)	0,1,(0)	0,1,(0)	0,1,(0)	SRR530634(1;1),
chr5	31341417	-	canonical	TACTG(A*)C	A	31341382	-35	expected	1	1	no	no	yes	1,0,(0)	1,0,(0)	0,0,(0)	0,0,(0)	SRR530634(1;1),
chr5	31472671	-	canonical	TTTTT(A*)T	A	31472647	-24	expected	1	1	yes	no	yes	0,0,(1)	0,0,(1)	0,0,(1)	0,0,(1)	SRR530635(1;1),
chr5	31503227	-	canonical	TGTTG(A*)C	A	31503195	-32	expected	3	3	yes	yes	yes	0,0,(3)	0,0,(3)	0,0,(3)	0,0,(3)	SRR530636(1;1),SRR530634(2;2),
chr5	31506549	-	canonical	TACTC(A*)C	A	31506532	-17	expected	1	1	yes	no	yes	0,0,(1)	0,0,(1)	0,0,(1)	0,0,(1)	SRR530634(1;1),
chr5	31589084	-	canonical	TACTC(A*)T	A	31589062	-22	expected	1	1	yes	no	yes	0,0,(1)	0,0,(1)	0,0,(1)	0,0,(1)	SRR530636(1;1),
chr5	33591357	-	canonical	AGCTC(A*)C	A	33591335	-22	expected	1	1	yes	no	yes	0,0,(1)	0,0,(1)	0,0,(1)	0,0,(1)	SRR530637(1;1),
chr5	34981725	-	canonical	AGCTC(A*)C	A	34981695	-30	expected	1	1	no	no	yes	0,0,(1)	0,0,(1)	0,0,(0)	0,0,(0)	SRR530636(1;1),
chr5	35440942	-	canonical	TGGTC(A*)C	A	35440922	-20	expected	1	1	yes	no	yes	0,0,(1)	0,0,(1)	0,0,(1)	0,0,(1)	SRR530636(1;1),
chr5	44151088	-	canonical	TCCTC(A*)C	A	44151064	-24	expected	2	2	no	no	yes	0,0,(2)	0,0,(2)	0,0,(0)	0,0,(0)	SRR530635(2;2),
chr5	45836005	-	canonical	TGTTC(A*)T	A	45835982	-23	expected	1	1	yes	no	yes	0,0,(1)	0,0,(1)	0,0,(1)	0,0,(1)	SRR530634(1;1),
chr5	65780869	-	canonical	GGCTC(A*)C	A	65780849	-20	expected	5	5	no	yes	yes	0,0,(5)	0,0,(5)	0,0,(0)	0,0,(0)	SRR530637(1;1),SRR530638(1;1),SRR530634(1;1),SRR530636(1;1),SRR530639(1;1),
chr5	66010311	-	canonical	TGTTT(A*)T	A	66010291	-20	expected	1	1	yes	no	yes	0,0,(1)	0,0,(1)	0,0,(1)	0,0,(1)	SRR530636(1;1),
chr5	73509849	-	canonical	TGTTA(A*)T	A	73509824	-25	expected	1	1	yes	no	yes	0,0,(1)	0,0,(1)	0,0,(1)	0,0,(1)	SRR530638(1;1),
chr5	100467026	-	canonical	AGCTT(A*)T	A	100467000	-26	expected	4	4	yes	yes	yes	0,1,(3)	0,1,(3)	0,0,(3)	0,0,(3)	SRR530636(4;4),
chr5	109001130	-	canonical	GGCTT(A*)C	A	109001105	-25	expected	1	1	yes	no	yes	0,0,(1)	0,0,(1)	0,0,(1)	0,0,(1)	SRR530637(1;1),
chr5	109014577	-	canonical	TACTC(A*)C	A	109014553	-24	expected	1	1	yes	no	yes	0,0,(1)	0,0,(1)	0,0,(1)	0,0,(1)	SRR530634(1;1),
chr5	109036065	-	canonical	TTCTT(A*)C	A	109036036	-29	expected	1	1	yes	no	yes	0,0,(1)	0,0,(1)	0,0,(1)	0,0,(1)	SRR530636(1;1),
chr5	111116983	-	canonical	TACTT(A*)C	A	111116960	-23	expected	2	2	yes	no	yes	0,0,(2)	0,0,(2)	0,0,(1)	0,0,(1)	SRR530636(2;2),
chr5	111138015	-	canonical	TATTC(A*)C	A	111137962	-53	expected	1	1	yes	no	yes	0,0,(1)	0,0,(1)	0,0,(1)	0,0,(1)	SRR530635(1;1),
chr5	111148312	-	canonical	TACTC(A*)C	A	111148283	-29	expected	1	1	yes	no	yes	0,0,(1)	0,0,(1)	0,0,(1)	0,0,(1)	SRR530636(1;1),
chr5	115707208	-	canonical	TCTTC(A*)C	A	115707182	-26	expected	1	1	yes	no	yes	0,0,(1)	0,0,(1)	0,0,(1)	0,0,(1)	SRR530634(1;1),
chr5	117735856	-	canonical	TGCTC(A*)C	A	117735830	-26	expected	2	2	yes	yes	yes	0,1,(1)	0,1,(1)	0,0,(1)	0,0,(1)	SRR530635(2;2),
chr5	118527737	-	canonical	GACTG(A*)C	A	118527713	-24	expected	1	1	no	no	yes	1,0,(0)	1,0,(0)	0,0,(0)	0,0,(0)	SRR530633(1;1),
chr5	122908254	-	canonical	GGCTG(A*)T	A	122908230	-24	expected	2	2	no	yes	yes	1,0,(1)	1,0,(1)	0,0,(0)	0,0,(0)	SRR530636(1;1),SRR530634(1;1),
chr5	122909695	-	canonical	AACTC(A*)C	A	122909659	-36	expected	1	1	yes	no	yes	0,0,(1)	0,0,(1)	0,0,(1)	0,0,(1)	SRR530637(1;1),
chr5	124190922	-	canonical	TACTA(A*)C	A	124190893	-29	expected	1	1	yes	no	yes	0,0,(1)	0,0,(1)	0,0,(1)	0,0,(1)	SRR530633(1;1),
chr5	130476431	-	canonical	TGCTC(A*)T	A	130476412	-19	expected	1	1	yes	no	yes	0,0,(1)	0,0,(1)	0,0,(1)	0,0,(1)	SRR530635(1;1),
chr5	135858428	-	canonical	GACTC(A*)C	A	135858406	-22	expected	1	1	yes	no	yes	0,0,(1)	0,0,(1)	0,0,(1)	0,0,(1)	SRR530636(1;1),
chr5	136608967	-	canonical	TGCTG(A*)T	A	136608949	-18	expected	1	1	no	no	yes	1,0,(0)	1,0,(0)	0,0,(0)	0,0,(0)	SRR530635(1;1),
chr5	136790294	-	canonical	TGGTG(A*)C	A	136790273	-21	expected	2	1	yes	no	yes	0,0,(2)	0,0,(1)	0,0,(2)	0,0,(1)	SRR530636(2;1),
chr5	137971715	-	canonical	TCCTC(A*)C	A	137971664	-51	expected	1	1	yes	no	yes	0,0,(1)	0,0,(1)	0,0,(1)	0,0,(1)	SRR530636(1;1),
chr5	140235361	-	canonical	TTCTT(A*)T	A	140235344	-17	expected	2	2	yes	no	yes	0,0,(2)	0,0,(2)	0,0,(2)	0,0,(2)	SRR530635(2;2),
chr5	140243859	-	canonical	TCCTT(A*)C	A	140243832	-27	expected	1	1	yes	no	yes	0,0,(1)	0,0,(1)	0,0,(1)	0,0,(1)	SRR530636(1;1),
chr5	141162072	-	canonical	TTCTG(A*)C	A	141162048	-24	expected	1	1	yes	no	yes	0,0,(1)	0,0,(1)	0,0,(1)	0,0,(1)	SRR530638(1;1),
chr5	145945538	-	canonical	TGCTA(G*)T	G	145945517	-21	expected	3	3	yes	yes	yes	0,3,(0)	0,3,(0)	0,3,(0)	0,3,(0)	SRR530637(1;1),SRR530636(1;1),SRR530635(1;1),
chr5	8927746	+	canonical	TATTG(A*)C	A	8927770	-24	expected	2	1	yes	no	yes	0,0,(2)	0,0,(1)	0,0,(2)	0,0,(1)	SRR530636(2;1),
chr5	20733816	+	canonical	TGCTT(A*)T	A	20733841	-25	expected	1	1	yes	no	yes	0,0,(1)	0,0,(1)	0,0,(1)	0,0,(1)	SRR530635(1;1),
chr5	23001781	+	canonical	TAGTG(A*)T	A	23001803	-22	expected	2	1	yes	no	yes	0,0,(2)	0,0,(1)	0,0,(2)	0,0,(1)	SRR530637(2;1),
chr5	23002767	+	canonical	TTCTT(A*)T	A	23002789	-22	expected	1	1	yes	no	yes	0,0,(1)	0,0,(1)	0,0,(1)	0,0,(1)	SRR530634(1;1),
chr5	28716008	+	canonical	TATTA(A*)T	A	28716042	-34	expected	1	1	no	no	yes	0,0,(1)	0,0,(1)	0,0,(0)	0,0,(0)	SRR530634(1;1),
chr5	29762447	+	canonical	TGTTT(A*)C	A	29762469	-22	expected	1	1	yes	no	yes	0,0,(1)	0,0,(1)	0,0,(1)	0,0,(1)	SRR530635(1;1),
chr5	29941426	+	canonical	TACTC(A*)T	A	29941447	-21	expected	1	1	yes	no	yes	0,0,(1)	0,0,(1)	0,0,(1)	0,0,(1)	SRR530635(1;1),
chr5	30077452	+	canonical	TACTC(A*)T	A	30077477	-25	expected	1	1	yes	no	yes	0,0,(1)	0,0,(1)	0,0,(1)	0,0,(1)	SRR530636(1;1),
chr5	31174074	+	canonical	CACTC(A*)C	A	31174093	-19	expected	1	1	yes	no	yes	0,0,(1)	0,0,(1)	0,0,(1)	0,0,(1)	SRR530635(1;1),
chr5	31379019	+	canonical	TGCAC(A*)T	A	31379046	-27	expected	1	1	yes	no	yes	0,0,(1)	0,0,(1)	0,0,(1)	0,0,(1)	SRR530635(1;1),
chr5	31379706	+	canonical	TGGTG(A*)C	A	31379723	-17	expected	1	1	yes	no	yes	0,0,(1)	0,0,(1)	0,0,(1)	0,0,(1)	SRR530635(1;1),
chr5	33280769	+	canonical	TGCTC(A*)C	A	33280793	-24	expected	1	1	yes	no	yes	0,0,(1)	0,0,(1)	0,0,(1)	0,0,(1)	SRR530634(1;1),
chr5	34692156	+	canonical	TGTTT(A*)T	A	34692198	-42	expected	1	1	yes	no	yes	0,0,(1)	0,0,(1)	0,0,(1)	0,0,(1)	SRR530634(1;1),
chr5	45889640	+	canonical	TGCTG(A*)C	A	45889672	-32	expected	2	2	yes	yes	yes	1,0,(1)	1,0,(1)	0,0,(1)	0,0,(1)	SRR530637(1;1),SRR530635(1;1),
chr5	53233115	+	canonical	TTCTC(A*)C	A	53233143	-28	expected	4	3	no	no	yes	0,0,(4)	0,0,(3)	0,0,(0)	0,0,(0)	SRR530636(4;3),
chr5	54507139	+	canonical	TTTTC(A*)T	A	54507157	-18	expected	1	1	yes	no	yes	0,0,(1)	0,0,(1)	0,0,(1)	0,0,(1)	SRR530635(1;1),
chr5	74938002	+	canonical	TATTT(A*)T	A	74938033	-31	expected	1	1	yes	no	yes	0,0,(1)	0,0,(1)	0,0,(1)	0,0,(1)	SRR530637(1;1),
chr5	74943107	+	canonical	TCTTA(A*)T	A	74943131	-24	expected	1	1	no	no	yes	1,0,(0)	1,0,(0)	0,0,(0)	0,0,(0)	SRR530634(1;1),
chr5	77026360	+	canonical	TGCTG(A*)C	A	77026381	-21	expected	1	1	no	no	yes	1,0,(0)	1,0,(0)	0,0,(0)	0,0,(0)	SRR530636(1;1),
chr5	77420980	+	canonical	TACTC(A*)T	A	77421014	-34	expected	1	1	yes	no	yes	0,0,(1)	0,0,(1)	0,0,(1)	0,0,(1)	SRR530638(1;1),
chr5	77765422	+	canonical	TATTC(A*)T	A	77765451	-29	expected	1	1	yes	no	yes	0,0,(1)	0,0,(1)	0,0,(1)	0,0,(1)	SRR530640(1;1),
chr5	77778083	+	canonical	TGCTG(A*)C	A	77778104	-21	expected	4	4	yes	yes	yes	0,0,(4)	0,0,(4)	0,0,(4)	0,0,(4)	SRR530637(1;1),SRR530633(1;1),SRR530636(1;1),SRR530639(1;1),
chr5	108333716	+	canonical	TACTG(A*)C	A	108333735	-19	expected	4	4	yes	yes	yes	2,0,(2)	2,0,(2)	0,0,(2)	0,0,(2)	SRR530633(1;1),SRR530638(1;1),SRR530637(1;1),SRR530636(1;1),
chr5	110634763	+	canonical	TACTT(A*)C	A	110634795	-32	expected	2	2	yes	yes	yes	0,0,(2)	0,0,(2)	0,0,(1)	0,0,(1)	SRR530636(1;1),SRR530637(1;1),
chr5	112804350	+	canonical	CACTC(A*)C	A	112804372	-22	expected	1	1	yes	no	yes	0,0,(1)	0,0,(1)	0,0,(1)	0,0,(1)	SRR530636(1;1),
chr5	114869461	+	canonical	TTCTG(A*)C	A	114869486	-25	expected	1	1	yes	no	yes	0,0,(1)	0,0,(1)	0,0,(1)	0,0,(1)	SRR530634(1;1),
chr5	115158985	+	canonical	TGTAC(A*)T	A	115159315	-330	distal	1	1	yes	no	yes	0,0,(1)	0,0,(1)	0,0,(1)	0,0,(1)	SRR530633(1;1),
chr5	115538274	+	canonical	CGCTG(A*)T	A	115538298	-24	expected	1	1	yes	no	yes	0,0,(1)	0,0,(1)	0,0,(1)	0,0,(1)	SRR530637(1;1),
chr5	115740919	+	canonical	TGTAC(A*)C	A	115740942	-23	expected	1	1	yes	no	yes	1,0,(0)	1,0,(0)	1,0,(0)	1,0,(0)	SRR530637(1;1),
chr5	116013272	+	canonical	TGCTG(A*)C	A	116013291	-19	expected	2	2	no	yes	yes	1,1,(0)	1,1,(0)	0,0,(0)	0,0,(0)	SRR530636(1;1),SRR530637(1;1),
chr5	120590525	+	canonical	TGGTG(A*)C	A	120590545	-20	expected	1	1	yes	no	yes	0,0,(1)	0,0,(1)	0,0,(1)	0,0,(1)	SRR530635(1;1),
chr5	121267618	+	canonical	TGTTT(A*)C	A	121267621	-3	proximal	1	1	no	no	yes	0,0,(1)	0,0,(1)	0,0,(0)	0,0,(0)	SRR530634(1;1),
chr5	121655385	+	canonical	GGTTG(A*)T	A	121655414	-29	expected	1	1	yes	no	yes	0,0,(1)	0,0,(1)	0,0,(1)	0,0,(1)	SRR530636(1;1),
chr5	121658375	+	canonical	TTCTT(A*)T	A	121658399	-24	expected	1	1	no	no	yes	0,1,(0)	0,1,(0)	0,0,(0)	0,0,(0)	SRR530636(1;1),
chr5	121767186	+	canonical	GGCTC(A*)C	A	121767210	-24	expected	1	1	no	no	yes	0,0,(1)	0,0,(1)	0,0,(0)	0,0,(0)	SRR530635(1;1),
chr5	121793083	+	canonical	TGCTC(A*)T	A	121793101	-18	expected	1	1	yes	no	yes	0,0,(1)	0,0,(1)	0,0,(1)	0,0,(1)	SRR530633(1;1),
chr5	121888711	+	canonical	TGCTG(A*)T	A	121888736	-25	expected	2	2	no	yes	yes	2,0,(0)	2,0,(0)	0,0,(0)	0,0,(0)	SRR530637(1;1),SRR530634(1;1),
chr5	122623132	+	canonical	TGCTC(A*)C	A	122623154	-22	expected	1	1	yes	no	yes	0,0,(1)	0,0,(1)	0,0,(1)	0,0,(1)	SRR530640(1;1),
chr5	123157870	+	canonical	TGCTC(G*)C	G	123164407	-6537	distal	1	1	no	no	yes	0,0,(1)	0,0,(1)	0,0,(0)	0,0,(0)	SRR530634(1;1),
chr5	124269849	+	canonical	TCCTC(A*)C	A	124269878	-29	expected	1	1	yes	no	yes	0,0,(1)	0,0,(1)	0,0,(1)	0,0,(1)	SRR530636(1;1),
chr5	130060298	+	canonical	TACAC(A*)T	A	130060317	-19	expected	2	2	yes	yes	yes	2,0,(0)	2,0,(0)	2,0,(0)	2,0,(0)	SRR530638(1;1),SRR530635(1;1),
chr5	135072718	+	canonical	AGCTC(A*)C	A	135072751	-33	expected	1	1	no	no	yes	0,0,(1)	0,0,(1)	0,0,(0)	0,0,(0)	SRR530635(1;1),
chr5	135073685	+	canonical	CGCTT(A*)C	A	135073718	-33	expected	1	1	no	no	yes	0,1,(0)	0,1,(0)	0,0,(0)	0,0,(0)	SRR530634(1;1),
chr5	136262080	+	canonical	AGCTG(A*)C	A	136262102	-22	expected	7	7	yes	yes	yes	6,0,(1)	6,0,(1)	0,0,(1)	0,0,(1)	SRR530637(1;1),SRR530640(1;1),SRR530634(2;2),SRR530636(3;3),
chr5	138012904	+	canonical	TGTTG(G*)T	G	138015614	-2710	distal	1	1	no	no	yes	0,1,(0)	0,1,(0)	0,0,(0)	0,0,(0)	SRR530634(1;1),
chr5	138075347	+	canonical	GGCTT(A*)C	A	138075371	-24	expected	1	1	no	no	yes	0,0,(1)	0,0,(1)	0,0,(0)	0,0,(0)	SRR530634(1;1),
chr5	138188051	+	canonical	CGCTC(A*)C	A	138188075	-24	expected	5	5	yes	yes	yes	1,0,(4)	1,0,(4)	0,0,(4)	0,0,(4)	SRR530637(2;2),SRR530638(1;1),SRR530636(2;2),
chr5	138538273	+	canonical	TACTC(A*)C	A	138538294	-21	expected	1	1	yes	no	yes	0,0,(1)	0,0,(1)	0,0,(1)	0,0,(1)	SRR530636(1;1),
chr5	140275070	+	canonical	TCCTA(A*)C	A	140275092	-22	expected	1	1	yes	no	yes	0,0,(1)	0,0,(1)	0,0,(1)	0,0,(1)	SRR530636(1;1),
chr5	145544829	+	canonical	AGCTG(A*)T	A	145544856	-27	expected	1	1	yes	no	yes	0,0,(1)	0,0,(1)	0,0,(1)	0,0,(1)	SRR530636(1;1),
chr6	7627349	-	canonical	CACTC(A*)C	A	7627331	-18	expected	2	2	yes	no	yes	0,0,(2)	0,0,(2)	0,0,(2)	0,0,(2)	SRR530636(2;2),
chr6	7632478	-	canonical	TGCAT(A*)C	A	7632456	-22	expected	1	1	yes	no	yes	1,0,(0)	1,0,(0)	1,0,(0)	1,0,(0)	SRR530636(1;1),
chr6	11855282	-	canonical	TAATT(A*)C	A	11855262	-20	expected	1	1	yes	no	yes	0,0,(1)	0,0,(1)	0,0,(1)	0,0,(1)	SRR530633(1;1),
chr6	29448075	-	canonical	TGGTG(A*)C	A	29448057	-18	expected	1	1	yes	no	yes	0,0,(1)	0,0,(1)	0,0,(1)	0,0,(1)	SRR530635(1;1),
chr6	29538118	-	canonical	TATTC(A*)T	A	29538096	-22	expected	1	1	yes	no	yes	0,0,(1)	0,0,(1)	0,0,(1)	0,0,(1)	SRR530637(1;1),
chr6	34855639	-	canonical	GGCTC(A*)C	A	34855618	-21	expected	1	1	yes	no	yes	0,0,(1)	0,0,(1)	0,0,(1)	0,0,(1)	SRR530634(1;1),
chr6	35001581	-	canonical	TATTT(A*)T	A	35001559	-22	expected	1	1	yes	no	yes	0,0,(1)	0,0,(1)	0,0,(1)	0,0,(1)	SRR530637(1;1),
chr6	47481849	-	canonical	TGCTC(A*)C	A	47481824	-25	expected	1	1	no	no	yes	1,0,(0)	1,0,(0)	0,0,(0)	0,0,(0)	SRR530636(1;1),
chr6	48717795	-	canonical	TGCTT(G*)T	G	48717775	-20	expected	1	1	no	no	yes	0,0,(1)	0,0,(1)	0,0,(0)	0,0,(0)	SRR530637(1;1),
chr6	49194955	-	canonical	TACTA(A*)T	A	49194934	-21	expected	1	1	no	no	yes	1,0,(0)	1,0,(0)	0,0,(0)	0,0,(0)	SRR530633(1;1),
chr6	71857874	-	canonical	TGCTA(A*)C	A	71857840	-34	expected	2	2	yes	no	yes	0,0,(2)	0,0,(2)	0,0,(2)	0,0,(2)	SRR530637(2;2),
chr6	83074446	-	canonical	TGTTC(A*)C	A	83074419	-27	expected	1	1	yes	no	yes	0,0,(1)	0,0,(1)	0,0,(1)	0,0,(1)	SRR530636(1;1),
chr6	88843221	-	canonical	TGCTC(A*)C	A	88843199	-22	expected	1	1	yes	no	yes	0,0,(1)	0,0,(1)	0,0,(1)	0,0,(1)	SRR530640(1;1),
chr6	90990747	-	canonical	TGCTG(A*)T	A	90990720	-27	expected	2	2	no	no	yes	0,0,(2)	0,0,(2)	0,0,(0)	0,0,(0)	SRR530636(2;2),
chr6	119894821	-	canonical	AACTT(A*)C	A	119894802	-19	expected	1	1	yes	no	yes	1,0,(0)	1,0,(0)	1,0,(0)	1,0,(0)	SRR530636(1;1),
chr6	120850401	-	canonical	TCCTG(A*)C	A	120850384	-17	expected	2	1	no	no	yes	2,0,(0)	1,0,(0)	0,0,(0)	0,0,(0)	SRR530638(2;1),
chr6	124762005	-	canonical	TACTC(A*)C	A	124761985	-20	expected	3	3	yes	yes	yes	0,0,(3)	0,0,(3)	0,0,(3)	0,0,(3)	SRR530638(1;1),SRR530637(1;1),SRR530636(1;1),
chr6	125113483	-	canonical	TTCTG(A*)T	A	125113454	-29	expected	1	1	yes	no	yes	0,0,(1)	0,0,(1)	0,0,(1)	0,0,(1)	SRR530637(1;1),
chr6	125134610	-	canonical	AGCTC(A*)T	A	125134580	-30	expected	5	4	yes	yes	yes	0,0,(5)	0,0,(4)	0,0,(5)	0,0,(4)	SRR530639(1;1),SRR530636(4;3),
chr6	125262413	-	canonical	CACTC(A*)C	A	125262384	-29	expected	1	1	no	no	yes	0,0,(1)	0,0,(1)	0,0,(0)	0,0,(0)	SRR530636(1;1),
chr6	131334610	-	canonical	TGCTA(A*)C	A	131334584	-26	expected	2	1	yes	no	yes	0,0,(2)	0,0,(1)	0,0,(2)	0,0,(1)	SRR530636(2;1),
chr6	145180804	-	canonical	TACTT(A*)T	A	145180774	-30	expected	2	2	no	no	yes	0,2,(0)	0,2,(0)	0,0,(0)	0,0,(0)	SRR530634(2;2),
chr6	146261812	-	canonical	TACTC(A*)C	A	146261489	-323	distal	1	1	no	no	yes	0,0,(1)	0,0,(1)	0,0,(0)	0,0,(0)	SRR530635(1;1),
chr6	148151086	-	canonical	TACTG(A*)C	A	148151064	-22	expected	1	1	yes	no	yes	0,0,(1)	0,0,(1)	0,0,(1)	0,0,(1)	SRR530634(1;1),
chr6	30064993	+	canonical	TGATG(A*)C	A	30065012	-19	expected	1	1	no	no	yes	1,0,(0)	1,0,(0)	0,0,(0)	0,0,(0)	SRR530633(1;1),
chr6	42257500	+	canonical	GGCTA(A*)C	A	42257524	-24	expected	1	1	yes	no	yes	0,0,(1)	0,0,(1)	0,0,(1)	0,0,(1)	SRR530640(1;1),
chr6	47473056	+	canonical	TGCTT(A*)C	A	47473076	-20	expected	1	1	yes	no	yes	0,0,(1)	0,0,(1)	0,0,(1)	0,0,(1)	SRR530637(1;1),
chr6	47876995	+	canonical	TGCTC(A*)T	A	47877018	-23	expected	5	5	yes	yes	yes	1,0,(4)	1,0,(4)	0,0,(4)	0,0,(4)	SRR530633(1;1),SRR530636(4;4),
chr6	55002144	+	canonical	TGTTC(A*)C	A	55002169	-25	expected	1	1	no	no	yes	0,0,(1)	0,0,(1)	0,0,(0)	0,0,(0)	SRR530637(1;1),
chr6	65831021	+	canonical	TTCTC(A*)C	A	65831042	-21	expected	1	1	yes	no	yes	0,0,(1)	0,0,(1)	0,0,(1)	0,0,(1)	SRR530640(1;1),
chr6	70846876	+	canonical	TACTC(A*)C	A	70846909	-33	expected	1	1	yes	no	yes	0,0,(1)	0,0,(1)	0,0,(1)	0,0,(1)	SRR530637(1;1),
chr6	83928969	+	canonical	TACTG(A*)T	A	83928987	-18	expected	1	1	no	no	yes	1,0,(0)	1,0,(0)	0,0,(0)	0,0,(0)	SRR530640(1;1),
chr6	85593127	+	canonical	TACTA(A*)C	A	85593151	-24	expected	1	1	yes	no	yes	0,0,(1)	0,0,(1)	0,0,(1)	0,0,(1)	SRR530636(1;1),
chr6	87847928	+	canonical	CACTC(A*)T	A	87847946	-18	expected	3	3	yes	yes	yes	0,0,(3)	0,0,(3)	0,0,(3)	0,0,(3)	SRR530635(2;2),SRR530634(1;1),
chr6	88447200	+	canonical	TGTTC(A*)C	A	88447221	-21	expected	4	2	yes	no	yes	0,0,(4)	0,0,(2)	0,0,(4)	0,0,(2)	SRR530634(4;2),
chr6	88859252	+	canonical	TCCTG(A*)C	A	88859283	-31	expected	1	1	yes	no	yes	0,0,(1)	0,0,(1)	0,0,(1)	0,0,(1)	SRR530639(1;1),
chr6	108360781	+	canonical	TCTTC(A*)C	A	108360802	-21	expected	1	1	yes	no	yes	0,0,(1)	0,0,(1)	0,0,(1)	0,0,(1)	SRR530635(1;1),
chr6	114657493	+	canonical	TCCTG(A*)C	A	114657521	-28	expected	1	1	yes	no	yes	0,0,(1)	0,0,(1)	0,0,(1)	0,0,(1)	SRR530634(1;1),
chr6	120427396	+	canonical	TCTTC(A*)C	A	120427413	-17	expected	1	1	yes	no	yes	0,0,(1)	0,0,(1)	0,0,(1)	0,0,(1)	SRR530637(1;1),
chr6	120428399	+	canonical	TGCAG(A*)C	A	120430020	-1621	distal	1	1	no	no	yes	0,1,(0)	0,1,(0)	0,0,(0)	0,0,(0)	SRR530637(1;1),
chr6	124665948	+	canonical	TGTTA(A*)C	A	124665971	-23	expected	1	1	no	no	yes	1,0,(0)	1,0,(0)	0,0,(0)	0,0,(0)	SRR530635(1;1),
chr6	146545789	+	canonical	TTCTC(A*)T	A	146545816	-27	expected	1	1	yes	no	yes	0,0,(1)	0,0,(1)	0,0,(1)	0,0,(1)	SRR530635(1;1),
chr7	4382122	-	canonical	CGCTC(A*)C	A	4382097	-25	expected	3	3	yes	yes	yes	0,0,(3)	0,0,(3)	0,0,(3)	0,0,(3)	SRR530634(1;1),SRR530636(2;2),
chr7	4434057	-	canonical	TCCTG(A*)C	A	4434031	-26	expected	1	1	no	no	yes	1,0,(0)	1,0,(0)	0,0,(0)	0,0,(0)	SRR530636(1;1),
chr7	4595182	-	canonical	CACTC(A*)C	A	4595157	-25	expected	1	1	yes	no	yes	0,0,(1)	0,0,(1)	0,0,(1)	0,0,(1)	SRR530633(1;1),
chr7	4763182	-	canonical	TGCTC(A*)C	A	4763158	-24	expected	3	3	yes	yes	yes	0,0,(3)	0,0,(3)	0,0,(3)	0,0,(3)	SRR530637(2;2),SRR530633(1;1),
chr7	7244696	-	canonical	TGTTC(A*)T	A	7244667	-29	expected	1	1	yes	no	yes	0,0,(1)	0,0,(1)	0,0,(1)	0,0,(1)	SRR530635(1;1),
chr7	16505944	-	canonical	TTCTC(A*)T	A	16505822	-122	distal	1	1	yes	no	yes	0,0,(1)	0,0,(1)	0,0,(1)	0,0,(1)	SRR530636(1;1),
chr7	20223604	-	canonical	TGCTC(C*)T	C	20223586	-18	expected	1	1	no	no	yes	1,0,(0)	1,0,(0)	0,0,(0)	0,0,(0)	SRR530636(1;1),
chr7	26499518	-	canonical	TGCCC(A*)C	A	26499501	-17	expected	2	2	no	yes	yes	0,2,(0)	0,2,(0)	0,0,(0)	0,0,(0)	SRR530635(1;1),SRR530638(1;1),
chr7	29102859	-	canonical	TATTT(A*)C	A	29102840	-19	expected	2	1	yes	no	yes	0,0,(2)	0,0,(1)	0,0,(2)	0,0,(1)	SRR530637(2;1),
chr7	29109019	-	canonical	TGCTG(A*)C	A	29109001	-18	expected	1	1	yes	no	yes	0,0,(1)	0,0,(1)	0,0,(1)	0,0,(1)	SRR530633(1;1),
chr7	31360660	-	canonical	TACTG(A*)C	A	31360643	-17	expected	1	1	no	no	yes	1,0,(0)	1,0,(0)	0,0,(0)	0,0,(0)	SRR530636(1;1),
chr7	31426546	-	canonical	TGCTG(A*)C	A	31426521	-25	expected	1	1	no	no	yes	1,0,(0)	1,0,(0)	0,0,(0)	0,0,(0)	SRR530637(1;1),
chr7	31915630	-	canonical	TGCTC(A*)T	A	31915603	-27	expected	1	1	no	no	yes	0,0,(1)	0,0,(1)	0,0,(0)	0,0,(0)	SRR530637(1;1),
chr7	34927914	-	canonical	TGTTT(A*)T	A	34927893	-21	expected	2	2	yes	yes	yes	0,0,(2)	0,0,(2)	0,0,(2)	0,0,(2)	SRR530637(1;1),SRR530635(1;1),
chr7	52119119	-	canonical	TCCTG(A*)C	A	52119102	-17	expected	1	1	yes	no	yes	0,0,(1)	0,0,(1)	0,0,(1)	0,0,(1)	SRR530635(1;1),
chr7	52267825	-	canonical	TACTC(A*)C	A	52267795	-30	expected	1	1	yes	no	yes	0,0,(1)	0,0,(1)	0,0,(1)	0,0,(1)	SRR530638(1;1),
chr7	52268182	-	canonical	AGCTT(A*)C	A	52268165	-17	expected	1	1	no	no	yes	0,1,(0)	0,1,(0)	0,0,(0)	0,0,(0)	SRR530636(1;1),
chr7	52378350	-	canonical	TGCTA(A*)C	A	52378328	-22	expected	2	2	yes	yes	yes	0,0,(2)	0,0,(2)	0,0,(2)	0,0,(2)	SRR530636(1;1),SRR530635(1;1),
chr7	52381626	-	canonical	TCCTT(A*)C	A	52381607	-19	expected	18	17	yes	yes	yes	3,1,(14)	3,1,(13)	3,0,(13)	3,0,(12)	SRR530638(1;1),SRR530640(1;1),SRR530637(4;3),SRR530639(4;4),SRR530635(4;4),SRR530634(2;2),SRR530636(2;2),
chr7	52381660	-	canonical	GGCTC(A*)C	A	52381607	-53	expected	2	2	yes	yes	yes	0,0,(2)	0,0,(2)	0,0,(2)	0,0,(2)	SRR530635(1;1),SRR530636(1;1),
chr7	52381724	-	canonical	AGCTG(A*)T	A	52381607	-117	distal	1	1	no	no	yes	0,0,(1)	0,0,(1)	0,0,(0)	0,0,(0)	SRR530636(1;1),
chr7	52382672	-	canonical	TGCTG(A*)C	A	52382644	-28	expected	1	1	no	no	yes	1,0,(0)	1,0,(0)	0,0,(0)	0,0,(0)	SRR530635(1;1),
chr7	56133236	-	canonical	AGCTC(A*)T	A	56131141	-2095	distal	2	2	no	no	yes	0,0,(2)	0,0,(2)	0,0,(0)	0,0,(0)	SRR530636(2;2),
chr7	85925530	-	canonical	TTCTT(A*)T	A	85925497	-33	expected	1	1	yes	no	yes	0,0,(1)	0,0,(1)	0,0,(1)	0,0,(1)	SRR530636(1;1),
chr7	86971889	-	canonical	TACTA(A*)C	A	86971867	-22	expected	1	1	yes	no	yes	0,0,(1)	0,0,(1)	0,0,(1)	0,0,(1)	SRR530634(1;1),
chr7	87373454	-	canonical	TGTTC(A*)C	A	87373434	-20	expected	1	1	yes	no	yes	0,0,(1)	0,0,(1)	0,0,(1)	0,0,(1)	SRR530636(1;1),
chr7	87737788	-	canonical	AGCTA(A*)C	A	87737764	-24	expected	1	1	yes	no	yes	0,1,(0)	0,1,(0)	0,1,(0)	0,1,(0)	SRR530636(1;1),
chr7	88487758	-	canonical	CGCTC(A*)C	A	88487735	-23	expected	3	2	yes	yes	yes	0,2,(1)	0,1,(1)	0,0,(1)	0,0,(1)	SRR530635(1;1),SRR530634(2;1),
chr7	106628247	-	canonical	TGGTC(A*)T	A	106627980	-267	distal	1	1	yes	no	yes	0,1,(0)	0,1,(0)	0,1,(0)	0,1,(0)	SRR530640(1;1),
chr7	109272232	-	canonical	TGTAC(A*)C	A	109272206	-26	expected	1	1	yes	no	yes	1,0,(0)	1,0,(0)	1,0,(0)	1,0,(0)	SRR530634(1;1),
chr7	117055614	-	canonical	TACTC(A*)C	A	117055581	-33	expected	1	1	yes	no	yes	0,0,(1)	0,0,(1)	0,0,(1)	0,0,(1)	SRR530638(1;1),
chr7	118219938	-	canonical	TTTTT(A*)T	A	118219907	-31	expected	2	2	yes	no	yes	0,0,(2)	0,0,(2)	0,0,(2)	0,0,(2)	SRR530634(2;2),
chr7	118220608	-	canonical	TACTT(A*)C	A	118220590	-18	expected	2	2	yes	no	yes	0,0,(2)	0,0,(2)	0,0,(2)	0,0,(2)	SRR530636(2;2),
chr7	123497653	-	canonical	TTTTT(A*)C	A	123497628	-25	expected	1	1	no	no	yes	0,1,(0)	0,1,(0)	0,0,(0)	0,0,(0)	SRR530637(1;1),
chr7	125252731	-	canonical	TACTC(A*)C	A	125252707	-24	expected	1	1	yes	no	yes	0,0,(1)	0,0,(1)	0,0,(1)	0,0,(1)	SRR530639(1;1),
chr7	125337260	-	canonical	TTTTA(A*)C	A	125337233	-27	expected	1	1	yes	no	yes	0,0,(1)	0,0,(1)	0,0,(1)	0,0,(1)	SRR530637(1;1),
chr7	125994222	-	canonical	AGCTA(A*)C	A	125994203	-19	expected	1	1	yes	no	yes	0,0,(1)	0,0,(1)	0,0,(1)	0,0,(1)	SRR530635(1;1),
chr7	129235226	-	canonical	TACTT(A*)T	A	129235199	-27	expected	1	1	yes	no	yes	0,0,(1)	0,0,(1)	0,0,(1)	0,0,(1)	SRR530636(1;1),
chr7	132611387	-	canonical	TGCTC(A*)T	A	132611357	-30	expected	2	2	yes	yes	yes	0,0,(2)	0,0,(2)	0,0,(2)	0,0,(2)	SRR530636(1;1),SRR530637(1;1),
chr7	132806194	-	canonical	AGCTC(A*)C	A	132806169	-25	expected	6	6	yes	yes	yes	0,1,(5)	0,1,(5)	0,0,(4)	0,0,(4)	SRR530638(2;2),SRR530637(1;1),SRR530635(1;1),SRR530636(2;2),
chr7	133557204	-	canonical	TCCTT(A*)C	A	133557183	-21	expected	1	1	yes	no	yes	0,0,(1)	0,0,(1)	0,0,(1)	0,0,(1)	SRR530637(1;1),
chr7	133636912	-	canonical	CACTC(A*)T	A	133636890	-22	expected	12	12	yes	yes	yes	0,0,(12)	0,0,(12)	0,0,(7)	0,0,(7)	SRR530633(1;1),SRR530638(2;2),SRR530635(1;1),SRR530634(4;4),SRR530636(4;4),
chr7	133641199	-	canonical	TCCTT(A*)C	A	133641182	-17	expected	4	4	yes	yes	yes	0,0,(4)	0,0,(4)	0,0,(4)	0,0,(4)	SRR530635(2;2),SRR530637(2;2),
chr7	133700040	-	canonical	TACTA(A*)C	A	133700021	-19	expected	3	2	yes	yes	yes	0,3,(0)	0,2,(0)	0,2,(0)	0,1,(0)	SRR530634(1;1),SRR530635(2;1),
chr7	137324018	-	canonical	AGCTG(A*)T	A	137323989	-29	expected	1	1	no	no	yes	1,0,(0)	1,0,(0)	0,0,(0)	0,0,(0)	SRR530639(1;1),
chr7	139458503	-	canonical	AACTC(A*)C	A	139458486	-17	expected	1	1	yes	no	yes	0,0,(1)	0,0,(1)	0,0,(1)	0,0,(1)	SRR530635(1;1),
chr7	140187076	-	canonical	CGCTC(A*)C	A	140187048	-28	expected	3	1	yes	no	yes	0,0,(3)	0,0,(1)	0,0,(3)	0,0,(1)	SRR530636(3;1),
chr7	142896499	-	canonical	TTTTC(A*)T	A	142896478	-21	expected	3	2	yes	yes	yes	0,0,(3)	0,0,(2)	0,0,(3)	0,0,(2)	SRR530636(1;1),SRR530635(2;1),
chr7	142900523	-	canonical	CACTT(A*)C	A	142900494	-29	expected	3	3	yes	no	yes	0,0,(3)	0,0,(3)	0,0,(3)	0,0,(3)	SRR530636(3;3),
chr7	150706370	-	canonical	TAGTC(A*)T	A	150706345	-25	expected	1	1	yes	no	yes	0,1,(0)	0,1,(0)	0,1,(0)	0,1,(0)	SRR530634(1;1),
chr7	150770737	-	canonical	AACTC(A*)T	A	150770702	-35	expected	1	1	yes	no	yes	0,0,(1)	0,0,(1)	0,0,(1)	0,0,(1)	SRR530636(1;1),
chr7	4091516	+	canonical	TACTG(A*)T	A	4091537	-21	expected	1	1	yes	no	yes	0,0,(1)	0,0,(1)	0,0,(1)	0,0,(1)	SRR530636(1;1),
chr7	4694190	+	canonical	GGCTC(A*)T	A	4694220	-30	expected	1	1	yes	no	yes	0,0,(1)	0,0,(1)	0,0,(1)	0,0,(1)	SRR530636(1;1),
chr7	5030759	+	canonical	TGTTC(A*)C	A	5030783	-24	expected	2	2	yes	yes	yes	0,0,(2)	0,0,(2)	0,0,(1)	0,0,(1)	SRR530636(1;1),SRR530639(1;1),
chr7	13610967	+	canonical	TTCTA(A*)C	A	13610992	-25	expected	1	1	yes	no	yes	0,1,(0)	0,1,(0)	0,1,(0)	0,1,(0)	SRR530636(1;1),
chr7	13884064	+	canonical	AACTC(A*)C	A	13884085	-21	expected	1	1	yes	no	yes	0,0,(1)	0,0,(1)	0,0,(1)	0,0,(1)	SRR530638(1;1),
chr7	25670448	+	canonical	TGCTT(T*)T	T	25670470	-22	expected	3	3	yes	yes	yes	0,0,(3)	0,0,(3)	0,0,(2)	0,0,(2)	SRR530635(1;1),SRR530634(1;1),SRR530633(1;1),
chr7	26409710	+	canonical	CACTC(A*)C	A	26409733	-23	expected	1	1	yes	no	yes	0,0,(1)	0,0,(1)	0,0,(1)	0,0,(1)	SRR530639(1;1),
chr7	29772207	+	canonical	TACTG(G*)T	G	29773092	-885	distal	1	1	no	no	yes	0,0,(1)	0,0,(1)	0,0,(0)	0,0,(0)	SRR530635(1;1),
chr7	56059700	+	canonical	TGCTA(A*)T	A	56059719	-19	expected	4	2	yes	no	yes	0,4,(0)	0,2,(0)	0,4,(0)	0,2,(0)	SRR530636(4;2),
chr7	63072588	+	canonical	GACTC(A*)C	A	63072608	-20	expected	1	1	yes	no	yes	0,0,(1)	0,0,(1)	0,0,(1)	0,0,(1)	SRR530634(1;1),
chr7	63143166	+	canonical	TGCTC(A*)C	A	63143191	-25	expected	1	1	yes	no	yes	0,0,(1)	0,0,(1)	0,0,(1)	0,0,(1)	SRR530636(1;1),
chr7	66560145	+	canonical	GACTC(A*)T	A	66560179	-34	expected	3	2	yes	yes	yes	0,0,(3)	0,0,(2)	0,0,(3)	0,0,(2)	SRR530637(2;1),SRR530636(1;1),
chr7	104633399	+	canonical	TTTTC(A*)C	A	104633426	-27	expected	1	1	yes	no	yes	0,0,(1)	0,0,(1)	0,0,(1)	0,0,(1)	SRR530639(1;1),
chr7	104679239	+	canonical	TTTTT(A*)C	A	104679261	-22	expected	1	1	yes	no	yes	0,0,(1)	0,0,(1)	0,0,(1)	0,0,(1)	SRR530636(1;1),
chr7	109579375	+	canonical	TCCTT(A*)T	A	109579398	-23	expected	1	1	yes	no	yes	0,0,(1)	0,0,(1)	0,0,(1)	0,0,(1)	SRR530637(1;1),
chr7	116847383	+	canonical	TGCAG(G*)C	G	116847459	-76	distal	2	2	no	no	yes	0,2,(0)	0,2,(0)	0,0,(0)	0,0,(0)	SRR530635(2;2),
chr7	129738340	+	canonical	TGCTG(A*)T	A	129738479	-139	distal	1	1	yes	no	yes	0,1,(0)	0,1,(0)	0,1,(0)	0,1,(0)	SRR530638(1;1),
chr7	130332284	+	canonical	TGCTC(A*)T	A	130332301	-17	expected	2	2	yes	yes	yes	1,0,(1)	1,0,(1)	0,0,(1)	0,0,(1)	SRR530639(1;1),SRR530637(1;1),
chr7	133808404	+	canonical	TGCTC(A*)C	A	133808429	-25	expected	1	1	yes	no	yes	0,0,(1)	0,0,(1)	0,0,(1)	0,0,(1)	SRR530638(1;1),
chr7	134678039	+	canonical	TGTTA(G*)C	G	134678061	-22	expected	1	1	yes	no	yes	0,0,(1)	0,0,(1)	0,0,(1)	0,0,(1)	SRR530638(1;1),
chr7	135116035	+	canonical	TCCTT(A*)C	A	135116067	-32	expected	1	1	yes	no	yes	1,0,(0)	1,0,(0)	1,0,(0)	1,0,(0)	SRR530633(1;1),
chr7	135124907	+	canonical	TGATA(A*)C	A	135124924	-17	expected	1	1	yes	no	yes	0,0,(1)	0,0,(1)	0,0,(1)	0,0,(1)	SRR530636(1;1),
chr7	148634598	+	canonical	TGCTG(A*)C	A	148634624	-26	expected	1	1	no	no	yes	1,0,(0)	1,0,(0)	0,0,(0)	0,0,(0)	SRR530637(1;1),
chr8	4270056	-	canonical	TGTTC(A*)T	A	4270025	-31	expected	1	1	yes	no	yes	0,0,(1)	0,0,(1)	0,0,(1)	0,0,(1)	SRR530635(1;1),
chr8	23691060	-	canonical	TTTTC(A*)T	A	23691039	-21	expected	1	1	yes	no	yes	0,1,(0)	0,1,(0)	0,1,(0)	0,1,(0)	SRR530637(1;1),
chr8	26933381	-	canonical	TTTTC(A*)C	A	26933360	-21	expected	1	1	no	no	yes	0,0,(1)	0,0,(1)	0,0,(0)	0,0,(0)	SRR530637(1;1),
chr8	32276707	-	canonical	TCCTC(A*)T	A	32276685	-22	expected	2	2	yes	no	yes	0,0,(2)	0,0,(2)	0,0,(1)	0,0,(1)	SRR530636(2;2),
chr8	37294273	-	canonical	TATAT(A*)T	A	37294241	-32	expected	1	1	yes	no	yes	1,0,(0)	1,0,(0)	1,0,(0)	1,0,(0)	SRR530635(1;1),
chr8	42435016	-	canonical	TGTTA(A*)C	A	42434978	-38	expected	1	1	yes	no	yes	0,0,(1)	0,0,(1)	0,0,(1)	0,0,(1)	SRR530638(1;1),
chr8	47083201	-	canonical	TTTTC(A*)C	A	47083174	-27	expected	1	1	yes	no	yes	0,1,(0)	0,1,(0)	0,1,(0)	0,1,(0)	SRR530635(1;1),
chr8	48949515	-	canonical	TGCTA(A*)C	A	48949486	-29	expected	1	1	yes	no	yes	0,0,(1)	0,0,(1)	0,0,(1)	0,0,(1)	SRR530635(1;1),
chr8	72544430	-	canonical	TGTTA(A*)T	A	72544409	-21	expected	1	1	yes	no	yes	0,0,(1)	0,0,(1)	0,0,(1)	0,0,(1)	SRR530637(1;1),
chr8	72820377	-	canonical	CACTC(A*)C	A	72820357	-20	expected	1	1	no	no	yes	0,1,(0)	0,1,(0)	0,0,(0)	0,0,(0)	SRR530634(1;1),
chr8	72856660	-	canonical	TGTTC(A*)C	A	72856641	-19	expected	1	1	yes	no	yes	0,0,(1)	0,0,(1)	0,0,(1)	0,0,(1)	SRR530637(1;1),
chr8	72862482	-	canonical	TGCTG(A*)C	A	72862460	-22	expected	1	1	yes	no	yes	0,0,(1)	0,0,(1)	0,0,(1)	0,0,(1)	SRR530637(1;1),
chr8	74235217	-	canonical	AGCTC(A*)C	A	74235191	-26	expected	2	2	yes	no	yes	0,0,(2)	0,0,(2)	0,0,(2)	0,0,(2)	SRR530639(2;2),
chr8	74922975	-	canonical	CACTC(A*)C	A	74922952	-23	expected	2	2	yes	yes	yes	0,0,(2)	0,0,(2)	0,0,(1)	0,0,(1)	SRR530633(1;1),SRR530637(1;1),
chr8	74988439	-	canonical	TGCTC(A*)T	A	74988418	-21	expected	2	2	yes	no	yes	0,0,(2)	0,0,(2)	0,0,(1)	0,0,(1)	SRR530634(2;2),
chr8	74994154	-	canonical	TGCTC(A*)T	A	74994126	-28	expected	1	1	no	no	yes	0,0,(1)	0,0,(1)	0,0,(0)	0,0,(0)	SRR530637(1;1),
chr8	74994978	-	canonical	AGCTC(A*)C	A	74994954	-24	expected	1	1	yes	no	yes	0,0,(1)	0,0,(1)	0,0,(1)	0,0,(1)	SRR530639(1;1),
chr8	82209201	-	canonical	TGCTC(A*)C	A	82209176	-25	expected	2	2	no	yes	yes	1,0,(1)	1,0,(1)	0,0,(0)	0,0,(0)	SRR530634(1;1),SRR530635(1;1),
chr8	86202353	-	canonical	TGCTC(A*)T	A	86201905	-448	distal	1	1	yes	no	yes	0,0,(1)	0,0,(1)	0,0,(1)	0,0,(1)	SRR530637(1;1),
chr8	87362059	-	canonical	TGGTG(A*)C	A	87362033	-26	expected	1	1	yes	no	yes	0,0,(1)	0,0,(1)	0,0,(1)	0,0,(1)	SRR530637(1;1),
chr8	87366961	-	canonical	TGCTG(A*)C	A	87366935	-26	expected	1	1	yes	no	yes	1,0,(0)	1,0,(0)	1,0,(0)	1,0,(0)	SRR530634(1;1),
chr8	87369983	-	canonical	TGATG(A*)C	A	87369964	-19	expected	2	2	no	yes	yes	2,0,(0)	2,0,(0)	0,0,(0)	0,0,(0)	SRR530633(1;1),SRR530636(1;1),
chr8	93799669	-	canonical	TTCTC(A*)C	A	93799635	-34	expected	1	1	yes	no	yes	0,0,(1)	0,0,(1)	0,0,(1)	0,0,(1)	SRR530636(1;1),
chr8	98244399	-	canonical	TGCTT(G*)T	G	98244385	-14	expected	1	1	yes	no	yes	0,0,(1)	0,0,(1)	0,0,(1)	0,0,(1)	SRR530640(1;1),
chr8	98257243	-	canonical	TTTTC(A*)C	A	98257223	-20	expected	1	1	no	no	yes	0,0,(1)	0,0,(1)	0,0,(0)	0,0,(0)	SRR530637(1;1),
chr8	108350116	-	canonical	TGTTG(A*)C	A	108350089	-27	expected	2	2	yes	no	yes	0,0,(2)	0,0,(2)	0,0,(2)	0,0,(2)	SRR530636(2;2),
chr8	110110637	-	canonical	GACTG(A*)C	A	110110616	-21	expected	6	5	no	yes	yes	6,0,(0)	5,0,(0)	0,0,(0)	0,0,(0)	SRR530634(2;2),SRR530636(4;3),
chr8	112086051	-	canonical	TCTTC(A*)C	A	112086036	-15	expected	1	1	no	no	yes	0,1,(0)	0,1,(0)	0,0,(0)	0,0,(0)	SRR530636(1;1),
chr8	113686393	-	canonical	TGCTG(A*)T	A	113686368	-25	expected	1	1	no	no	yes	1,0,(0)	1,0,(0)	0,0,(0)	0,0,(0)	SRR530635(1;1),
chr8	114522892	-	canonical	TATTA(A*)C	A	114522862	-30	expected	1	1	yes	no	yes	0,0,(1)	0,0,(1)	0,0,(1)	0,0,(1)	SRR530637(1;1),
chr8	122127397	-	canonical	TGCAC(A*)C	A	122127365	-32	expected	2	1	yes	no	yes	0,0,(2)	0,0,(1)	0,0,(2)	0,0,(1)	SRR530637(2;1),
chr8	124083035	-	canonical	GACTC(A*)T	A	124082994	-41	expected	1	1	no	no	yes	0,0,(1)	0,0,(1)	0,0,(0)	0,0,(0)	SRR530633(1;1),
chr8	124978960	-	canonical	TGCTC(G*)C	G	124978934	-26	expected	1	1	no	no	yes	0,1,(0)	0,1,(0)	0,0,(0)	0,0,(0)	SRR530640(1;1),
chr8	125009887	-	canonical	GGCTC(A*)C	A	125009856	-31	expected	3	2	yes	yes	yes	0,0,(3)	0,0,(2)	0,0,(3)	0,0,(2)	SRR530634(1;1),SRR530636(2;1),
chr8	125016629	-	canonical	TTCTG(A*)T	A	125016611	-18	expected	2	2	yes	yes	yes	1,0,(1)	1,0,(1)	0,0,(1)	0,0,(1)	SRR530634(1;1),SRR530636(1;1),
chr8	125024222	-	canonical	CGCTA(A*)T	A	125024204	-18	expected	1	1	yes	no	yes	0,0,(1)	0,0,(1)	0,0,(1)	0,0,(1)	SRR530636(1;1),
chr8	125162153	-	canonical	GGCTG(A*)T	A	125162123	-30	expected	3	3	yes	no	yes	0,0,(3)	0,0,(3)	0,0,(3)	0,0,(3)	SRR530636(3;3),
chr8	126486138	-	canonical	TTCTC(A*)C	A	126486105	-33	expected	1	1	yes	no	yes	0,0,(1)	0,0,(1)	0,0,(1)	0,0,(1)	SRR530633(1;1),
chr8	127206076	-	canonical	TCCTC(A*)T	A	127206059	-17	expected	1	1	yes	no	yes	0,0,(1)	0,0,(1)	0,0,(1)	0,0,(1)	SRR530634(1;1),
chr8	127212919	-	canonical	GGCTC(A*)C	A	127212898	-21	expected	1	1	yes	no	yes	0,0,(1)	0,0,(1)	0,0,(1)	0,0,(1)	SRR530635(1;1),
chr8	127364426	-	canonical	TGCTA(A*)C	A	127364406	-20	expected	1	1	yes	no	yes	0,0,(1)	0,0,(1)	0,0,(1)	0,0,(1)	SRR530639(1;1),
chr8	128974748	-	canonical	TCCTT(A*)C	A	128974725	-23	expected	1	1	yes	no	yes	1,0,(0)	1,0,(0)	1,0,(0)	1,0,(0)	SRR530636(1;1),
chr8	11831465	+	canonical	CACTC(A*)C	A	11831492	-27	expected	1	1	yes	no	yes	0,0,(1)	0,0,(1)	0,0,(1)	0,0,(1)	SRR530636(1;1),
chr8	13123847	+	canonical	AGCTC(A*)T	A	13123869	-22	expected	3	2	yes	yes	yes	0,0,(3)	0,0,(2)	0,0,(3)	0,0,(2)	SRR530636(2;1),SRR530637(1;1),
chr8	13133624	+	canonical	TGCTG(A*)C	A	13133648	-24	expected	1	1	yes	no	yes	0,0,(1)	0,0,(1)	0,0,(1)	0,0,(1)	SRR530636(1;1),
chr8	13167126	+	canonical	TTCTC(A*)T	A	13167157	-31	expected	1	1	no	no	yes	0,0,(1)	0,0,(1)	0,0,(0)	0,0,(0)	SRR530636(1;1),
chr8	13172519	+	canonical	TGATA(A*)C	A	13172540	-21	expected	2	2	yes	yes	yes	1,1,(0)	1,1,(0)	0,1,(0)	0,1,(0)	SRR530634(1;1),SRR530635(1;1),
chr8	13173594	+	canonical	TGCTC(A*)C	A	13173626	-32	expected	1	1	yes	no	yes	0,0,(1)	0,0,(1)	0,0,(1)	0,0,(1)	SRR530636(1;1),
chr8	13339597	+	canonical	TTCTC(A*)T	A	13339664	-67	distal	1	1	no	no	yes	0,0,(1)	0,0,(1)	0,0,(0)	0,0,(0)	SRR530636(1;1),
chr8	18868874	+	canonical	TACTG(A*)C	A	18868892	-18	expected	1	1	yes	no	yes	0,0,(1)	0,0,(1)	0,0,(1)	0,0,(1)	SRR530637(1;1),
chr8	24205656	+	canonical	TGCTG(A*)C	A	24205683	-27	expected	1	1	yes	no	yes	0,0,(1)	0,0,(1)	0,0,(1)	0,0,(1)	SRR530634(1;1),
chr8	26920248	+	canonical	TACCC(A*)C	A	26920278	-30	expected	1	1	yes	no	yes	0,0,(1)	0,0,(1)	0,0,(1)	0,0,(1)	SRR530635(1;1),
chr8	42373960	+	canonical	AACTG(A*)C	A	42373984	-24	expected	1	1	yes	no	yes	0,0,(1)	0,0,(1)	0,0,(1)	0,0,(1)	SRR530636(1;1),
chr8	72668900	+	canonical	AACTG(A*)C	A	72668922	-22	expected	2	2	yes	yes	yes	0,0,(2)	0,0,(2)	0,0,(2)	0,0,(2)	SRR530637(1;1),SRR530638(1;1),
chr8	72784866	+	canonical	TTCTC(A*)C	A	72785129	-263	distal	1	1	yes	no	yes	0,0,(1)	0,0,(1)	0,0,(1)	0,0,(1)	SRR530635(1;1),
chr8	77524525	+	canonical	TATTG(A*)C	A	77524548	-23	expected	2	2	yes	yes	yes	0,1,(1)	0,1,(1)	0,1,(1)	0,1,(1)	SRR530636(1;1),SRR530634(1;1),
chr8	82193793	+	canonical	TTTTT(A*)T	A	82193822	-29	expected	1	1	yes	no	yes	0,0,(1)	0,0,(1)	0,0,(1)	0,0,(1)	SRR530635(1;1),
chr8	83024795	+	canonical	TGTTT(A*)T	A	83024822	-27	expected	1	1	yes	no	yes	0,0,(1)	0,0,(1)	0,0,(1)	0,0,(1)	SRR530636(1;1),
chr8	85765409	+	canonical	GGCTC(A*)T	A	85765436	-27	expected	1	1	yes	no	yes	0,0,(1)	0,0,(1)	0,0,(1)	0,0,(1)	SRR530637(1;1),
chr8	86246101	+	canonical	TACTC(G*)C	G	86246128	-27	expected	2	2	no	yes	yes	0,2,(0)	0,2,(0)	0,0,(0)	0,0,(0)	SRR530639(1;1),SRR530637(1;1),
chr8	87562255	+	canonical	CGCTG(A*)T	A	87562276	-21	expected	1	1	yes	no	yes	0,0,(1)	0,0,(1)	0,0,(1)	0,0,(1)	SRR530633(1;1),
chr8	91194519	+	canonical	GGCTC(A*)C	A	91194561	-42	expected	1	1	yes	no	yes	0,0,(1)	0,0,(1)	0,0,(1)	0,0,(1)	SRR530637(1;1),
chr8	96581590	+	canonical	TGCTC(A*)C	A	96581615	-25	expected	1	1	yes	no	yes	0,0,(1)	0,0,(1)	0,0,(1)	0,0,(1)	SRR530635(1;1),
chr8	96697005	+	canonical	CGCTC(A*)C	A	96697026	-21	expected	1	1	yes	no	yes	0,0,(1)	0,0,(1)	0,0,(1)	0,0,(1)	SRR530634(1;1),
chr8	96697211	+	canonical	CGCTC(A*)C	A	96697235	-24	expected	4	4	yes	yes	yes	2,0,(2)	2,0,(2)	0,0,(2)	0,0,(2)	SRR530636(4;4),
chr8	97160501	+	canonical	TATTT(A*)C	A	97160523	-22	expected	1	1	yes	no	yes	0,0,(1)	0,0,(1)	0,0,(1)	0,0,(1)	SRR530636(1;1),
chr8	97385587	+	canonical	TCCTC(A*)T	A	97385610	-23	expected	1	1	no	no	yes	1,0,(0)	1,0,(0)	0,0,(0)	0,0,(0)	SRR530638(1;1),
chr8	107824199	+	canonical	TGCTT(A*)C	A	107824218	-19	expected	1	1	yes	no	yes	0,0,(1)	0,0,(1)	0,0,(1)	0,0,(1)	SRR530637(1;1),
chr8	108774184	+	canonical	TACAG(A*)C	A	108774207	-23	expected	1	1	yes	no	yes	1,0,(0)	1,0,(0)	1,0,(0)	1,0,(0)	SRR530636(1;1),
chr8	109525378	+	canonical	TGATC(A*)C	A	109525409	-31	expected	1	1	yes	no	yes	0,0,(1)	0,0,(1)	0,0,(1)	0,0,(1)	SRR530637(1;1),
chr8	112342771	+	canonical	TGCTC(A*)C	A	112342817	-46	expected	1	1	yes	no	yes	0,0,(1)	0,0,(1)	0,0,(1)	0,0,(1)	SRR530636(1;1),
chr8	113404757	+	canonical	TCCTG(A*)C	A	113404774	-17	expected	1	1	yes	no	yes	0,0,(1)	0,0,(1)	0,0,(1)	0,0,(1)	SRR530637(1;1),
chr8	113567522	+	canonical	TGCTC(A*)C	A	113567542	-20	expected	3	2	yes	yes	yes	0,0,(3)	0,0,(2)	0,0,(3)	0,0,(2)	SRR530636(2;1),SRR530637(1;1),
chr8	122472551	+	canonical	TACTT(A*)C	A	122472578	-27	expected	1	1	yes	no	yes	0,0,(1)	0,0,(1)	0,0,(1)	0,0,(1)	SRR530637(1;1),
chr8	123098048	+	canonical	TGCTA(A*)C	A	123098070	-22	expected	1	1	yes	no	yes	0,0,(1)	0,0,(1)	0,0,(1)	0,0,(1)	SRR530637(1;1),
chr8	123102350	+	canonical	TTCTG(A*)C	A	123102368	-18	expected	1	1	yes	no	yes	0,0,(1)	0,0,(1)	0,0,(1)	0,0,(1)	SRR530636(1;1),
chr8	123197849	+	canonical	TCCTC(A*)C	A	123197870	-21	expected	2	2	yes	no	yes	0,0,(2)	0,0,(2)	0,0,(2)	0,0,(2)	SRR530636(2;2),
chr8	125001055	+	canonical	TGCTG(A*)T	A	125001076	-21	expected	1	1	no	no	yes	1,0,(0)	1,0,(0)	0,0,(0)	0,0,(0)	SRR530634(1;1),
chr8	125096371	+	canonical	GGCTT(A*)C	A	125096393	-22	expected	1	1	yes	no	yes	0,0,(1)	0,0,(1)	0,0,(1)	0,0,(1)	SRR530639(1;1),
chr8	126054705	+	canonical	TGCTC(A*)C	A	126054726	-21	expected	1	1	yes	no	yes	0,0,(1)	0,0,(1)	0,0,(1)	0,0,(1)	SRR530637(1;1),
chr9	7005636	-	canonical	TTTTC(A*)C	A	7005615	-21	expected	1	1	yes	no	yes	0,0,(1)	0,0,(1)	0,0,(1)	0,0,(1)	SRR530635(1;1),
chr9	7081189	-	canonical	TGCTT(A*)T	A	7081158	-31	expected	1	1	yes	no	yes	0,0,(1)	0,0,(1)	0,0,(1)	0,0,(1)	SRR530635(1;1),
chr9	13623151	-	canonical	TGCTT(A*)C	A	13622888	-263	distal	1	1	no	no	yes	1,0,(0)	1,0,(0)	0,0,(0)	0,0,(0)	SRR530633(1;1),
chr9	20700693	-	canonical	TCCTC(A*)C	A	20700664	-29	expected	2	2	yes	no	yes	0,0,(2)	0,0,(2)	0,0,(1)	0,0,(1)	SRR530636(2;2),
chr9	20728260	-	canonical	TTCTT(A*)T	A	20728238	-22	expected	7	7	yes	yes	yes	0,1,(6)	0,1,(6)	0,0,(3)	0,0,(3)	SRR530633(1;1),SRR530635(1;1),SRR530634(2;2),SRR530636(3;3),
chr9	20867189	-	canonical	TTCTC(A*)T	A	20867161	-28	expected	1	1	yes	no	yes	0,0,(1)	0,0,(1)	0,0,(1)	0,0,(1)	SRR530633(1;1),
chr9	20881120	-	canonical	TACCA(A*)C	A	20881085	-35	expected	1	1	yes	no	yes	0,0,(1)	0,0,(1)	0,0,(1)	0,0,(1)	SRR530636(1;1),
chr9	20890558	-	canonical	GGCTC(A*)T	A	20885819	-4739	distal	1	1	no	no	yes	0,1,(0)	0,1,(0)	0,0,(0)	0,0,(0)	SRR530635(1;1),
chr9	20890569	-	canonical	TGCAA(A*)T	A	20885819	-4750	distal	1	1	yes	no	yes	0,1,(0)	0,1,(0)	0,1,(0)	0,1,(0)	SRR530635(1;1),
chr9	30978241	-	canonical	TCCTG(A*)T	A	30978218	-23	expected	2	2	yes	no	yes	0,0,(2)	0,0,(2)	0,0,(2)	0,0,(2)	SRR530636(2;2),
chr9	36554252	-	canonical	TACTT(A*)C	A	36554230	-22	expected	1	1	no	no	yes	0,1,(0)	0,1,(0)	0,0,(0)	0,0,(0)	SRR530633(1;1),
chr9	42782906	-	canonical	TGTTT(A*)G	A	42782873	-33	expected	2	1	yes	no	yes	0,0,(2)	0,0,(1)	0,0,(2)	0,0,(1)	SRR530636(2;1),
chr9	44107428	-	canonical	TCCTC(A*)C	A	44107407	-21	expected	1	1	yes	no	yes	0,0,(1)	0,0,(1)	0,0,(1)	0,0,(1)	SRR530635(1;1),
chr9	44149374	-	canonical	TGTTA(A*)T	A	44149347	-27	expected	1	1	yes	no	yes	0,0,(1)	0,0,(1)	0,0,(1)	0,0,(1)	SRR530636(1;1),
chr9	44166416	-	canonical	TGCTA(A*)C	A	44166399	-17	expected	1	1	yes	no	yes	0,0,(1)	0,0,(1)	0,0,(1)	0,0,(1)	SRR530634(1;1),
chr9	44639505	-	canonical	TGATG(A*)C	A	44639480	-25	expected	1	1	yes	no	yes	0,0,(1)	0,0,(1)	0,0,(1)	0,0,(1)	SRR530634(1;1),
chr9	44748253	-	canonical	TGCTC(A*)T	A	44748231	-22	expected	3	3	no	yes	yes	1,2,(0)	1,2,(0)	0,0,(0)	0,0,(0)	SRR530637(1;1),SRR530635(2;2),
chr9	54579270	-	canonical	TACTG(A*)C	A	54579244	-26	expected	1	1	yes	no	yes	0,0,(1)	0,0,(1)	0,0,(1)	0,0,(1)	SRR530634(1;1),
chr9	57475332	-	canonical	AGCTG(A*)C	A	57475310	-22	expected	1	1	yes	no	yes	0,1,(0)	0,1,(0)	0,1,(0)	0,1,(0)	SRR530634(1;1),
chr9	57603206	-	canonical	GGCTT(A*)T	A	57603175	-31	expected	1	1	yes	no	yes	0,0,(1)	0,0,(1)	0,0,(1)	0,0,(1)	SRR530637(1;1),
chr9	64177394	-	canonical	TGCTC(A*)C	A	64177375	-19	expected	1	1	yes	no	yes	0,0,(1)	0,0,(1)	0,0,(1)	0,0,(1)	SRR530636(1;1),
chr9	64574623	-	canonical	TGCAG(A*)T	A	64573389	-1234	distal	1	1	no	no	yes	1,0,(0)	1,0,(0)	0,0,(0)	0,0,(0)	SRR530637(1;1),
chr9	64774163	-	canonical	TTCTC(A*)T	A	64774142	-21	expected	1	1	yes	no	yes	0,0,(1)	0,0,(1)	0,0,(1)	0,0,(1)	SRR530636(1;1),
chr9	75241361	-	canonical	TGTTT(A*)C	A	75241336	-25	expected	1	1	yes	no	yes	0,0,(1)	0,0,(1)	0,0,(1)	0,0,(1)	SRR530638(1;1),
chr9	77932479	-	canonical	AGCTC(A*)C	A	77932461	-18	expected	1	1	yes	no	yes	0,0,(1)	0,0,(1)	0,0,(1)	0,0,(1)	SRR530633(1;1),
chr9	77932489	-	canonical	TGGTT(A*)T	A	77932461	-28	expected	1	1	yes	no	yes	0,0,(1)	0,0,(1)	0,0,(1)	0,0,(1)	SRR530636(1;1),
chr9	82769115	-	canonical	TTCTC(A*)T	A	82769094	-21	expected	1	1	yes	no	yes	0,0,(1)	0,0,(1)	0,0,(1)	0,0,(1)	SRR530638(1;1),
chr9	87148909	-	canonical	TGTTT(A*)T	A	87148883	-26	expected	1	1	yes	no	yes	0,0,(1)	0,0,(1)	0,0,(1)	0,0,(1)	SRR530638(1;1),
chr9	88416841	-	canonical	TACTC(A*)T	A	88416813	-28	expected	4	4	yes	yes	yes	0,0,(4)	0,0,(4)	0,0,(4)	0,0,(4)	SRR530634(1;1),SRR530635(1;1),SRR530637(2;2),
chr9	90100082	-	canonical	TGCTC(A*)T	A	90100060	-22	expected	1	1	yes	no	yes	0,0,(1)	0,0,(1)	0,0,(1)	0,0,(1)	SRR530638(1;1),
chr9	96239151	-	canonical	TGCTG(A*)C	A	96239128	-23	expected	2	2	yes	no	yes	0,0,(2)	0,0,(2)	0,0,(2)	0,0,(2)	SRR530636(2;2),
chr9	102489370	-	canonical	TCCTA(A*)C	A	102489342	-28	expected	1	1	yes	no	yes	0,0,(1)	0,0,(1)	0,0,(1)	0,0,(1)	SRR530634(1;1),
chr9	103094708	-	canonical	TGCTC(A*)T	A	103094679	-29	expected	2	2	yes	no	yes	0,0,(2)	0,0,(2)	0,0,(2)	0,0,(2)	SRR530635(2;2),
chr9	104139528	-	canonical	TCCTC(A*)C	A	104139507	-21	expected	3	3	yes	yes	yes	0,1,(2)	0,1,(2)	0,0,(2)	0,0,(2)	SRR530637(1;1),SRR530636(1;1),SRR530634(1;1),
chr9	107230640	-	canonical	AGCTG(A*)C	A	107230620	-20	expected	1	1	no	no	yes	1,0,(0)	1,0,(0)	0,0,(0)	0,0,(0)	SRR530635(1;1),
chr9	107643443	-	canonical	TACTA(A*)C	A	107643423	-20	expected	1	1	yes	no	yes	0,0,(1)	0,0,(1)	0,0,(1)	0,0,(1)	SRR530634(1;1),
chr9	107645058	-	canonical	TACTC(C*)T	C	107645029	-29	expected	2	2	no	no	yes	0,0,(2)	0,0,(2)	0,0,(0)	0,0,(0)	SRR530638(2;2),
chr9	107989615	-	canonical	TGCTG(A*)C	A	107989595	-20	expected	1	1	no	no	yes	1,0,(0)	1,0,(0)	0,0,(0)	0,0,(0)	SRR530635(1;1),
chr9	108112010	-	canonical	AACTC(A*)C	A	108111992	-18	expected	1	1	yes	no	yes	0,0,(1)	0,0,(1)	0,0,(1)	0,0,(1)	SRR530640(1;1),
chr9	115166722	-	canonical	TATTC(A*)C	A	115166700	-22	expected	1	1	yes	no	yes	0,0,(1)	0,0,(1)	0,0,(1)	0,0,(1)	SRR530634(1;1),
chr9	13640523	+	canonical	TAATC(A*)T	A	13640546	-23	expected	1	1	yes	no	yes	0,0,(1)	0,0,(1)	0,0,(1)	0,0,(1)	SRR530635(1;1),
chr9	13644054	+	canonical	TGTAC(A*)T	A	13644083	-29	expected	1	1	yes	no	yes	0,0,(1)	0,0,(1)	0,0,(1)	0,0,(1)	SRR530636(1;1),
chr9	18108702	+	canonical	TATTG(A*)T	A	18108726	-24	expected	1	1	yes	no	yes	0,0,(1)	0,0,(1)	0,0,(1)	0,0,(1)	SRR530638(1;1),
chr9	20695058	+	canonical	GGCTC(A*)C	A	20695082	-24	expected	1	1	yes	no	yes	0,0,(1)	0,0,(1)	0,0,(1)	0,0,(1)	SRR530635(1;1),
chr9	21203843	+	canonical	TACAC(A*)C	A	21203859	-16	expected	1	1	yes	no	yes	1,0,(0)	1,0,(0)	1,0,(0)	1,0,(0)	SRR530636(1;1),
chr9	21283277	+	canonical	TGCTG(A*)C	A	21283342	-65	distal	1	1	yes	no	yes	0,0,(1)	0,0,(1)	0,0,(1)	0,0,(1)	SRR530637(1;1),
chr9	21345009	+	canonical	TGCTG(A*)C	A	21345029	-20	expected	1	1	no	no	yes	1,0,(0)	1,0,(0)	0,0,(0)	0,0,(0)	SRR530634(1;1),
chr9	21443129	+	canonical	TCCTC(A*)T	A	21443157	-28	expected	1	1	yes	no	yes	0,0,(1)	0,0,(1)	0,0,(1)	0,0,(1)	SRR530636(1;1),
chr9	21483336	+	canonical	TGCTA(A*)C	A	21483372	-36	expected	3	3	yes	yes	yes	0,0,(3)	0,0,(3)	0,0,(3)	0,0,(3)	SRR530639(1;1),SRR530635(1;1),SRR530636(1;1),
chr9	21735731	+	canonical	TTCTC(A*)C	A	21735753	-22	expected	2	2	yes	no	yes	0,0,(2)	0,0,(2)	0,0,(2)	0,0,(2)	SRR530639(2;2),
chr9	21815850	+	canonical	TCCTC(A*)T	A	21815881	-31	expected	2	2	no	yes	yes	0,1,(1)	0,1,(1)	0,0,(0)	0,0,(0)	SRR530636(2;2),
chr9	22040628	+	canonical	TGCTT(A*)T	A	22040645	-17	expected	2	2	yes	yes	yes	0,1,(1)	0,1,(1)	0,0,(1)	0,0,(1)	SRR530637(2;2),
chr9	27126774	+	canonical	TGTTT(A*)T	A	27126790	-16	expected	1	1	yes	no	yes	0,0,(1)	0,0,(1)	0,0,(1)	0,0,(1)	SRR530637(1;1),
chr9	44188867	+	canonical	AACTG(A*)C	A	44188898	-31	expected	1	1	no	no	yes	1,0,(0)	1,0,(0)	0,0,(0)	0,0,(0)	SRR530637(1;1),
chr9	44196064	+	canonical	TCCTT(A*)T	A	44196088	-24	expected	1	1	no	no	yes	0,1,(0)	0,1,(0)	0,0,(0)	0,0,(0)	SRR530634(1;1),
chr9	44597947	+	canonical	TTTTC(A*)T	A	44597973	-26	expected	1	1	yes	no	yes	0,0,(1)	0,0,(1)	0,0,(1)	0,0,(1)	SRR530638(1;1),
chr9	46017612	+	canonical	GGCTT(A*)T	A	46017637	-25	expected	1	1	yes	no	yes	0,0,(1)	0,0,(1)	0,0,(1)	0,0,(1)	SRR530634(1;1),
chr9	50674524	+	canonical	AACTG(A*)C	A	50674548	-24	expected	1	1	no	no	yes	1,0,(0)	1,0,(0)	0,0,(0)	0,0,(0)	SRR530634(1;1),
chr9	55066098	+	canonical	TCCTC(A*)T	A	55066121	-23	expected	1	1	yes	no	yes	0,1,(0)	0,1,(0)	0,1,(0)	0,1,(0)	SRR530636(1;1),
chr9	65171983	+	canonical	TGCTT(A*)T	A	65172013	-30	expected	1	1	yes	no	yes	0,0,(1)	0,0,(1)	0,0,(1)	0,0,(1)	SRR530637(1;1),
chr9	67823545	+	canonical	TGCTT(A*)T	A	67823588	-43	expected	1	1	yes	no	yes	0,0,(1)	0,0,(1)	0,0,(1)	0,0,(1)	SRR530635(1;1),
chr9	69264722	+	canonical	TGGTA(A*)T	A	69264740	-18	expected	2	2	yes	no	yes	0,2,(0)	0,2,(0)	0,2,(0)	0,2,(0)	SRR530636(2;2),
chr9	70216440	+	canonical	TGCTG(A*)T	A	70216475	-35	expected	1	1	no	no	yes	1,0,(0)	1,0,(0)	0,0,(0)	0,0,(0)	SRR530637(1;1),
chr9	72970044	+	canonical	TATTT(A*)C	A	72970070	-26	expected	1	1	yes	no	yes	0,0,(1)	0,0,(1)	0,0,(1)	0,0,(1)	SRR530637(1;1),
chr9	79986828	+	canonical	TTCTC(A*)T	A	79986850	-22	expected	1	1	yes	no	yes	0,0,(1)	0,0,(1)	0,0,(1)	0,0,(1)	SRR530634(1;1),
chr9	83750906	+	canonical	TATTT(A*)C	A	83750924	-18	expected	1	1	yes	no	yes	0,0,(1)	0,0,(1)	0,0,(1)	0,0,(1)	SRR530636(1;1),
chr9	92501877	+	canonical	TACTG(A*)T	A	92501912	-35	expected	1	1	yes	no	yes	0,0,(1)	0,0,(1)	0,0,(1)	0,0,(1)	SRR530640(1;1),
chr9	103236358	+	canonical	TAGTT(A*)T	A	103236385	-27	expected	1	1	no	no	yes	0,0,(1)	0,0,(1)	0,0,(0)	0,0,(0)	SRR530637(1;1),
chr9	106767903	+	canonical	GGCTT(A*)T	A	106767928	-25	expected	1	1	yes	no	yes	0,0,(1)	0,0,(1)	0,0,(1)	0,0,(1)	SRR530636(1;1),
chr9	107467155	+	canonical	TCTTC(A*)C	A	107467177	-22	expected	2	2	no	no	yes	0,2,(0)	0,2,(0)	0,0,(0)	0,0,(0)	SRR530635(2;2),
chr9	107985333	+	canonical	GGCTG(A*)C	A	107985359	-26	expected	2	1	no	no	yes	2,0,(0)	1,0,(0)	0,0,(0)	0,0,(0)	SRR530638(2;1),
chr9	108395268	+	canonical	GGCTC(A*)C	A	108395298	-30	expected	1	1	no	no	yes	0,1,(0)	0,1,(0)	0,0,(0)	0,0,(0)	SRR530634(1;1),
chr9	109744419	+	canonical	TAGTC(A*)C	A	109744440	-21	expected	1	1	no	no	yes	0,1,(0)	0,1,(0)	0,0,(0)	0,0,(0)	SRR530638(1;1),
chr9	122912665	+	canonical	TGCAG(A*)T	A	122912687	-22	expected	1	1	no	no	yes	1,0,(0)	1,0,(0)	0,0,(0)	0,0,(0)	SRR530636(1;1),
chrX	7721107	-	canonical	GACTG(A*)C	A	7721073	-34	expected	4	3	yes	yes	yes	2,0,(2)	1,0,(2)	0,0,(2)	0,0,(2)	SRR530636(3;2),SRR530634(1;1),
chrX	20613625	-	canonical	TGCTG(A*)C	A	20613597	-28	expected	1	1	no	no	yes	1,0,(0)	1,0,(0)	0,0,(0)	0,0,(0)	SRR530636(1;1),
chrX	71198411	-	canonical	TGTTC(A*)T	A	71198389	-22	expected	1	1	yes	no	yes	0,0,(1)	0,0,(1)	0,0,(1)	0,0,(1)	SRR530635(1;1),
chrX	90850783	-	canonical	TGCTC(A*)T	A	90850752	-31	expected	1	1	no	no	yes	0,0,(1)	0,0,(1)	0,0,(0)	0,0,(0)	SRR530636(1;1),
chrX	130772801	-	canonical	TATTA(A*)C	A	130772781	-20	expected	1	1	no	no	yes	0,1,(0)	0,1,(0)	0,0,(0)	0,0,(0)	SRR530635(1;1),
chrX	147524985	-	canonical	TACTT(A*)A	A	147524957	-28	expected	1	1	no	no	yes	0,1,(0)	0,1,(0)	0,0,(0)	0,0,(0)	SRR530636(1;1),
chrX	7369163	+	canonical	TCCTG(A*)T	A	7369195	-32	expected	1	1	yes	no	yes	0,0,(1)	0,0,(1)	0,0,(1)	0,0,(1)	SRR530635(1;1),
chrX	7377621	+	canonical	TGCTG(A*)T	A	7377661	-40	expected	1	1	no	no	yes	1,0,(0)	1,0,(0)	0,0,(0)	0,0,(0)	SRR530634(1;1),
chrX	12865383	+	canonical	TACTG(A*)T	A	12865404	-21	expected	1	1	yes	no	yes	0,0,(1)	0,0,(1)	0,0,(1)	0,0,(1)	SRR530636(1;1),
chrX	12865679	+	canonical	TGATA(A*)T	A	12865698	-19	expected	2	2	no	no	yes	2,0,(0)	2,0,(0)	0,0,(0)	0,0,(0)	SRR530639(2;2),
chrX	17740483	+	canonical	CACTA(A*)C	A	17740509	-26	expected	1	1	yes	no	yes	0,0,(1)	0,0,(1)	0,0,(1)	0,0,(1)	SRR530638(1;1),
chrX	20258210	+	canonical	TTCTC(A*)T	A	20258233	-23	expected	3	3	yes	yes	yes	0,0,(3)	0,0,(3)	0,0,(3)	0,0,(3)	SRR530634(1;1),SRR530636(2;2),
chrX	71516973	+	canonical	TAATC(A*)C	A	71516998	-25	expected	1	1	yes	no	yes	0,0,(1)	0,0,(1)	0,0,(1)	0,0,(1)	SRR530633(1;1),
chrX	71689091	+	canonical	TGTTC(A*)C	A	71689110	-19	expected	1	1	yes	no	yes	0,0,(1)	0,0,(1)	0,0,(1)	0,0,(1)	SRR530633(1;1),
chrX	98514731	+	canonical	TGGTG(A*)C	A	98514757	-26	expected	2	1	yes	no	yes	0,0,(2)	0,0,(1)	0,0,(2)	0,0,(1)	SRR530638(2;1),
chrX	130609028	+	canonical	TACAC(A*)C	A	130609051	-23	expected	3	3	yes	yes	yes	3,0,(0)	3,0,(0)	3,0,(0)	3,0,(0)	SRR530637(1;1),SRR530634(1;1),SRR530636(1;1),
chrX	130615706	+	canonical	AACTC(A*)C	A	130615729	-23	expected	4	4	yes	yes	yes	0,0,(4)	0,0,(4)	0,0,(3)	0,0,(3)	SRR530633(1;1),SRR530636(3;3),
chrX	135872451	+	canonical	TTCTA(A*)T	A	135872484	-33	expected	3	3	yes	no	yes	0,0,(3)	0,0,(3)	0,0,(3)	0,0,(3)	SRR530636(3;3),
chrX	147514398	+	canonical	TGTAC(A*)C	A	147514421	-23	expected	1	1	no	no	yes	1,0,(0)	1,0,(0)	0,0,(0)	0,0,(0)	SRR530639(1;1),
chrX	148341782	+	canonical	CACTT(A*)C	A	148341818	-36	expected	4	3	yes	yes	yes	0,0,(4)	0,0,(3)	0,0,(4)	0,0,(3)	SRR530635(2;2),SRR530636(2;1),
chrX	148367444	+	canonical	TCTTT(A*)C	A	148367482	-38	expected	1	1	yes	no	yes	0,0,(1)	0,0,(1)	0,0,(1)	0,0,(1)	SRR530637(1;1),
chrX	148481173	+	canonical	TCTTC(A*)T	A	148481202	-29	expected	1	1	yes	no	yes	0,0,(1)	0,0,(1)	0,0,(1)	0,0,(1)	SRR530636(1;1),
chrX	148495495	+	canonical	TATTA(G*)C	G	148495518	-23	expected	2	2	yes	yes	yes	0,2,(0)	0,2,(0)	0,2,(0)	0,2,(0)	SRR530636(1;1),SRR530635(1;1),
chrX	156998011	+	canonical	AACTC(A*)T	A	156998031	-20	expected	1	1	yes	no	yes	0,0,(1)	0,0,(1)	0,0,(1)	0,0,(1)	SRR530636(1;1),
chrX	157028842	+	canonical	CACTC(A*)T	A	157028870	-28	expected	1	1	yes	no	yes	0,0,(1)	0,0,(1)	0,0,(1)	0,0,(1)	SRR530636(1;1),
chrY	264125	+	canonical	TCTTT(A*)C	A	264152	-27	expected	1	1	no	no	yes	0,1,(0)	0,1,(0)	0,0,(0)	0,0,(0)	SRR530635(1;1),
chr1	20793760	-	canonicalC	TACTT(C*)C	C	20793735	-25	expected	1	1	no	no	yes	0,0,(1)	0,0,(1)	0,0,(0)	0,0,(0)	SRR530634(1;1),
chr1	36219943	-	canonicalC	TGCTC(C*)C	C	36219208	-735	distal	1	1	no	no	yes	0,1,(0)	0,1,(0)	0,0,(0)	0,0,(0)	SRR530638(1;1),
chr1	75474418	-	canonicalC	TGCTA(T*)C	T	75474393	-25	expected	1	1	yes	no	yes	0,1,(0)	0,1,(0)	0,1,(0)	0,1,(0)	SRR530636(1;1),
chr1	93285063	-	canonicalC	TTCTG(T*)C	T	93285041	-22	expected	2	2	no	no	yes	2,0,(0)	2,0,(0)	0,0,(0)	0,0,(0)	SRR530639(2;2),
chr1	94356879	-	canonicalC	TGCTG(T*)A	T	94348696	-8183	distal	1	1	no	no	yes	1,0,(0)	1,0,(0)	0,0,(0)	0,0,(0)	SRR530636(1;1),
chr1	95522807	-	canonicalC	TGATG(C*)C	C	95522785	-22	expected	1	1	no	no	yes	0,0,(1)	0,0,(1)	0,0,(0)	0,0,(0)	SRR530636(1;1),
chr1	162665923	-	canonicalC	TACTA(C*)T	C	162665889	-34	expected	1	1	yes	no	yes	0,1,(0)	0,1,(0)	0,1,(0)	0,1,(0)	SRR530635(1;1),
chr1	172087249	-	canonicalC	TACTA(C*)T	C	172087227	-22	expected	1	1	yes	no	yes	0,1,(0)	0,1,(0)	0,1,(0)	0,1,(0)	SRR530637(1;1),
chr1	181676680	-	canonicalC	TCCTA(C*)T	C	181676659	-21	expected	1	1	yes	no	yes	0,1,(0)	0,1,(0)	0,1,(0)	0,1,(0)	SRR530637(1;1),
chr1	37426176	+	canonicalC	TGTGG(C*)C	C	37426202	-26	expected	1	1	yes	no	yes	0,0,(1)	0,0,(1)	0,0,(1)	0,0,(1)	SRR530637(1;1),
chr1	74743724	+	canonicalC	TGCTC(C*)C	C	74743752	-28	expected	2	2	yes	yes	yes	1,0,(1)	1,0,(1)	1,0,(0)	1,0,(0)	SRR530635(1;1),SRR530638(1;1),
chr1	89676669	+	canonicalC	CACTG(C*)C	C	89676699	-30	expected	1	1	no	no	yes	0,0,(1)	0,0,(1)	0,0,(0)	0,0,(0)	SRR530636(1;1),
chr1	89838935	+	canonicalC	TGTTG(C*)C	C	89838957	-22	expected	1	1	no	no	yes	0,0,(1)	0,0,(1)	0,0,(0)	0,0,(0)	SRR530637(1;1),
chr1	137049334	+	canonicalC	TGCTC(C*)T	C	137049369	-35	expected	1	1	no	no	yes	0,0,(1)	0,0,(1)	0,0,(0)	0,0,(0)	SRR530633(1;1),
chr1	168319948	+	canonicalC	TGCTA(T*)T	T	168319966	-18	expected	2	2	yes	yes	yes	0,2,(0)	0,2,(0)	0,2,(0)	0,2,(0)	SRR530636(1;1),SRR530634(1;1),
chr1	173337474	+	canonicalC	AACTA(T*)C	T	173337488	-14	expected	1	1	yes	no	yes	0,1,(0)	0,1,(0)	0,1,(0)	0,1,(0)	SRR530638(1;1),
chr1	187091034	+	canonicalC	TGTTA(C*)C	C	187091051	-17	expected	1	1	no	no	yes	0,0,(1)	0,0,(1)	0,0,(0)	0,0,(0)	SRR530637(1;1),
chr10	39861381	-	canonicalC	TGCAG(C*)T	C	39800613	-60768	distal	1	1	no	no	yes	0,1,(0)	0,1,(0)	0,0,(0)	0,0,(0)	SRR530635(1;1),
chr10	75847673	-	canonicalC	TGCTT(C*)C	C	75847650	-23	expected	1	1	no	no	yes	0,0,(1)	0,0,(1)	0,0,(0)	0,0,(0)	SRR530633(1;1),
chr10	80172045	-	canonicalC	TACAG(C*)C	C	80172031	-14	expected	1	1	yes	no	yes	1,0,(0)	1,0,(0)	1,0,(0)	1,0,(0)	SRR530635(1;1),
chr10	80620781	-	canonicalC	GGCTA(C*)C	C	80620762	-19	expected	2	1	no	no	yes	0,0,(2)	0,0,(1)	0,0,(0)	0,0,(0)	SRR530640(2;1),
chr10	80954824	-	canonicalC	TGGTA(T*)C	T	80954802	-22	expected	1	1	yes	no	yes	0,1,(0)	0,1,(0)	0,1,(0)	0,1,(0)	SRR530637(1;1),
chr10	116495274	-	canonicalC	TATTA(C*)C	C	116495254	-20	expected	2	1	yes	no	yes	0,2,(0)	0,1,(0)	0,2,(0)	0,1,(0)	SRR530636(2;1),
chr10	116799267	-	canonicalC	TGCTA(C*)T	C	116799243	-24	expected	1	1	yes	no	yes	0,1,(0)	0,1,(0)	0,1,(0)	0,1,(0)	SRR530637(1;1),
chr10	126957489	-	canonicalC	CACTG(C*)C	C	126957473	-16	expected	1	1	no	no	yes	0,0,(1)	0,0,(1)	0,0,(0)	0,0,(0)	SRR530637(1;1),
chr10	41199402	+	canonicalC	TATTA(C*)C	C	41199424	-22	expected	1	1	no	no	yes	0,0,(1)	0,0,(1)	0,0,(0)	0,0,(0)	SRR530636(1;1),
chr10	41203951	+	canonicalC	TGCTA(C*)C	C	41203970	-19	expected	2	2	no	yes	yes	0,0,(2)	0,0,(2)	0,0,(0)	0,0,(0)	SRR530637(1;1),SRR530635(1;1),
chr10	42524848	+	canonicalC	TACAG(C*)T	C	42524881	-33	expected	1	1	yes	no	yes	1,0,(0)	1,0,(0)	1,0,(0)	1,0,(0)	SRR530639(1;1),
chr10	50365442	+	canonicalC	TATTA(T*)T	T	50365468	-26	expected	1	1	yes	no	yes	0,1,(0)	0,1,(0)	0,1,(0)	0,1,(0)	SRR530634(1;1),
chr10	57881127	+	canonicalC	TGTGA(C*)C	C	57881146	-19	expected	1	1	yes	no	yes	0,1,(0)	0,1,(0)	0,1,(0)	0,1,(0)	SRR530637(1;1),
chr10	80072053	+	canonicalC	GGCTA(C*)C	C	80072074	-21	expected	8	8	no	yes	yes	0,0,(8)	0,0,(8)	0,0,(0)	0,0,(0)	SRR530633(1;1),SRR530638(1;1),SRR530640(1;1),SRR530634(5;5),
chr10	80580871	+	canonicalC	AGCTA(C*)C	C	80580896	-25	expected	1	1	no	no	yes	0,0,(1)	0,0,(1)	0,0,(0)	0,0,(0)	SRR530636(1;1),
chr10	82347220	+	canonicalC	TATTA(T*)T	T	82347229	-9	proximal	1	1	yes	no	yes	0,1,(0)	0,1,(0)	0,1,(0)	0,1,(0)	SRR530640(1;1),
chr10	107687945	+	canonicalC	TTTTG(T*)C	T	107687969	-24	expected	1	1	no	no	yes	0,0,(1)	0,0,(1)	0,0,(0)	0,0,(0)	SRR530634(1;1),
chr10	127642118	+	canonicalC	CACTG(C*)C	C	127642143	-25	expected	4	4	no	yes	yes	0,0,(4)	0,0,(4)	0,0,(0)	0,0,(0)	SRR530636(3;3),SRR530640(1;1),
chr11	6414557	-	canonicalC	TCTTA(C*)C	C	6414540	-17	expected	1	1	yes	no	yes	0,1,(0)	0,1,(0)	0,1,(0)	0,1,(0)	SRR530637(1;1),
chr11	6516416	-	canonicalC	AGCTA(T*)C	T	6515769	-647	distal	2	2	yes	no	yes	2,0,(0)	2,0,(0)	2,0,(0)	2,0,(0)	SRR530637(2;2),
chr11	20208104	-	canonicalC	TGCTT(C*)C	C	20208089	-15	expected	1	1	no	no	yes	0,0,(1)	0,0,(1)	0,0,(0)	0,0,(0)	SRR530637(1;1),
chr11	33061649	-	canonicalC	TGCTT(T*)C	T	33061627	-22	expected	1	1	no	no	yes	0,1,(0)	0,1,(0)	0,0,(0)	0,0,(0)	SRR530640(1;1),
chr11	48621782	-	canonicalC	TGCTC(C*)C	C	48621754	-28	expected	1	1	no	no	yes	0,0,(1)	0,0,(1)	0,0,(0)	0,0,(0)	SRR530636(1;1),
chr11	50110913	-	canonicalC	TCCTA(C*)A	C	50110896	-17	expected	1	1	yes	no	yes	1,0,(0)	1,0,(0)	1,0,(0)	1,0,(0)	SRR530635(1;1),
chr11	60529479	-	canonicalC	AACTA(C*)C	C	60529459	-20	expected	2	2	yes	yes	yes	0,0,(2)	0,0,(2)	0,0,(1)	0,0,(1)	SRR530637(1;1),SRR530639(1;1),
chr11	62156877	-	canonicalC	TGCTA(C*)C	C	62156853	-24	expected	2	2	no	yes	yes	1,0,(1)	1,0,(1)	0,0,(0)	0,0,(0)	SRR530637(1;1),SRR530635(1;1),
chr11	86120586	-	canonicalC	CACTG(C*)C	C	86120564	-22	expected	4	2	no	no	yes	4,0,(0)	2,0,(0)	0,0,(0)	0,0,(0)	SRR530635(4;2),
chr11	86142135	-	canonicalC	TATAG(C*)C	C	86142111	-24	expected	2	2	yes	no	yes	2,0,(0)	2,0,(0)	2,0,(0)	2,0,(0)	SRR530638(2;2),
chr11	88701093	-	canonicalC	TCCTG(T*)C	T	88701065	-28	expected	1	1	no	no	yes	0,0,(1)	0,0,(1)	0,0,(0)	0,0,(0)	SRR530638(1;1),
chr11	95935034	-	canonicalC	GACTG(C*)C	C	95935015	-19	expected	3	3	no	yes	yes	0,0,(3)	0,0,(3)	0,0,(0)	0,0,(0)	SRR530638(2;2),SRR530634(1;1),
chr11	95964086	-	canonicalC	AGCTA(C*)C	C	95964066	-20	expected	1	1	no	no	yes	1,0,(0)	1,0,(0)	0,0,(0)	0,0,(0)	SRR530640(1;1),
chr11	100375678	-	canonicalC	TGTTG(T*)T	T	100375651	-27	expected	1	1	no	no	yes	1,0,(0)	1,0,(0)	0,0,(0)	0,0,(0)	SRR530637(1;1),
chr11	100572562	-	canonicalC	TTCTG(C*)C	C	100572543	-19	expected	1	1	no	no	yes	0,0,(1)	0,0,(1)	0,0,(0)	0,0,(0)	SRR530638(1;1),
chr11	102729984	-	canonicalC	TCTTA(T*)C	T	102729966	-18	expected	1	1	yes	no	yes	0,1,(0)	0,1,(0)	0,1,(0)	0,1,(0)	SRR530633(1;1),
chr11	102932726	-	canonicalC	AGCTG(C*)C	C	102932704	-22	expected	8	7	no	yes	yes	1,0,(7)	1,0,(6)	0,0,(0)	0,0,(0)	SRR530638(2;2),SRR530637(6;5),
chr11	106645499	-	canonicalC	TACTA(C*)T	C	106645476	-23	expected	3	3	yes	yes	yes	0,3,(0)	0,3,(0)	0,3,(0)	0,3,(0)	SRR530634(1;1),SRR530636(1;1),SRR530635(1;1),
chr11	106646631	-	canonicalC	TACTC(C*)T	C	106646610	-21	expected	2	2	yes	no	yes	0,2,(0)	0,2,(0)	0,2,(0)	0,2,(0)	SRR530637(2;2),
chr11	115277192	-	canonicalC	TGTAG(C*)T	C	115223102	-54090	distal	2	1	no	no	yes	2,0,(0)	1,0,(0)	0,0,(0)	0,0,(0)	SRR530636(2;1),
chr11	115470496	-	canonicalC	TGCAG(C*)T	C	115470467	-29	expected	2	2	yes	yes	yes	2,0,(0)	2,0,(0)	2,0,(0)	2,0,(0)	SRR530636(1;1),SRR530635(1;1),
chr11	116466410	-	canonicalC	CGCTG(C*)C	C	116465820	-590	distal	1	1	no	no	yes	0,0,(1)	0,0,(1)	0,0,(0)	0,0,(0)	SRR530633(1;1),
chr11	118053805	-	canonicalC	TGCAG(C*)T	C	118053775	-30	expected	5	5	yes	yes	yes	5,0,(0)	5,0,(0)	4,0,(0)	4,0,(0)	SRR530636(1;1),SRR530638(2;2),SRR530637(2;2),
chr11	120244734	-	canonicalC	TGCAA(C*)C	C	120244713	-21	expected	1	1	yes	no	yes	1,0,(0)	1,0,(0)	1,0,(0)	1,0,(0)	SRR530636(1;1),
chr11	120672128	-	canonicalC	TGCAG(C*)T	C	120672106	-22	expected	1	1	yes	no	yes	1,0,(0)	1,0,(0)	1,0,(0)	1,0,(0)	SRR530636(1;1),
chr11	4037192	+	canonicalC	TGCTT(C*)C	C	4037214	-22	expected	1	1	no	no	yes	0,0,(1)	0,0,(1)	0,0,(0)	0,0,(0)	SRR530638(1;1),
chr11	4061029	+	canonicalC	TACTA(C*)C	C	4061048	-19	expected	2	2	yes	yes	yes	0,2,(0)	0,2,(0)	0,2,(0)	0,2,(0)	SRR530634(1;1),SRR530636(1;1),
chr11	32620435	+	canonicalC	TTCTG(C*)C	C	32620471	-36	expected	1	1	no	no	yes	0,0,(1)	0,0,(1)	0,0,(0)	0,0,(0)	SRR530637(1;1),
chr11	48616876	+	canonicalC	TGCTT(C*)C	C	48616905	-29	expected	1	1	no	no	yes	0,0,(1)	0,0,(1)	0,0,(0)	0,0,(0)	SRR530636(1;1),
chr11	49981632	+	canonicalC	TGTAG(T*)C	T	49981670	-38	expected	1	1	yes	no	yes	1,0,(0)	1,0,(0)	1,0,(0)	1,0,(0)	SRR530637(1;1),
chr11	62416704	+	canonicalC	AATTG(C*)C	C	62416736	-32	expected	7	7	no	yes	yes	0,0,(7)	0,0,(7)	0,0,(0)	0,0,(0)	SRR530635(1;1),SRR530639(2;2),SRR530634(2;2),SRR530638(1;1),SRR530637(1;1),
chr11	68917321	+	canonicalC	TGCTG(C*)C	C	68917343	-22	expected	2	2	no	no	yes	0,0,(2)	0,0,(2)	0,0,(0)	0,0,(0)	SRR530635(2;2),
chr11	70423029	+	canonicalC	TACTG(C*)C	C	70423055	-26	expected	5	4	no	yes	yes	0,0,(5)	0,0,(4)	0,0,(0)	0,0,(0)	SRR530638(1;1),SRR530637(2;1),SRR530636(2;2),
chr11	70423522	+	canonicalC	TGCTT(C*)C	C	70423579	-57	expected	1	1	no	no	yes	0,0,(1)	0,0,(1)	0,0,(0)	0,0,(0)	SRR530636(1;1),
chr11	78064485	+	canonicalC	GACTG(C*)C	C	78064517	-32	expected	2	2	no	yes	yes	0,0,(2)	0,0,(2)	0,0,(0)	0,0,(0)	SRR530633(1;1),SRR530636(1;1),
chr11	78106173	+	canonicalC	TATTG(C*)C	C	78106195	-22	expected	3	3	no	yes	yes	0,0,(3)	0,0,(3)	0,0,(0)	0,0,(0)	SRR530635(2;2),SRR530633(1;1),
chr11	78128440	+	canonicalC	TGATG(T*)C	T	78128462	-22	expected	2	2	no	yes	yes	0,0,(2)	0,0,(2)	0,0,(0)	0,0,(0)	SRR530636(1;1),SRR530638(1;1),
chr11	87588980	+	canonicalC	TGCTT(C*)T	C	87589003	-23	expected	1	1	no	no	yes	0,0,(1)	0,0,(1)	0,0,(0)	0,0,(0)	SRR530637(1;1),
chr11	95250369	+	canonicalC	CACTG(C*)C	C	95250393	-24	expected	2	1	no	no	yes	0,0,(2)	0,0,(1)	0,0,(0)	0,0,(0)	SRR530637(2;1),
chr11	98282155	+	canonicalC	CACTG(C*)C	C	98282178	-23	expected	1	1	no	no	yes	0,0,(1)	0,0,(1)	0,0,(0)	0,0,(0)	SRR530639(1;1),
chr11	98549250	+	canonicalC	TGCTG(C*)T	C	98551776	-2526	distal	1	1	no	no	yes	0,1,(0)	0,1,(0)	0,0,(0)	0,0,(0)	SRR530635(1;1),
chr11	100952402	+	canonicalC	TGTCA(C*)C	C	100952422	-20	expected	1	1	yes	no	yes	0,1,(0)	0,1,(0)	0,1,(0)	0,1,(0)	SRR530636(1;1),
chr11	102294255	+	canonicalC	GGCTG(C*)C	C	102294278	-23	expected	2	2	no	yes	yes	0,0,(2)	0,0,(2)	0,0,(0)	0,0,(0)	SRR530637(1;1),SRR530638(1;1),
chr11	104988072	+	canonicalC	AGCTG(C*)C	C	104988089	-17	expected	1	1	no	no	yes	0,0,(1)	0,0,(1)	0,0,(0)	0,0,(0)	SRR530637(1;1),
chr11	115442019	+	canonicalC	TGCAG(T*)C	T	115442043	-24	expected	1	1	yes	no	yes	1,0,(0)	1,0,(0)	1,0,(0)	1,0,(0)	SRR530634(1;1),
chr11	115647470	+	canonicalC	TGCTC(C*)C	C	115647489	-19	expected	1	1	no	no	yes	0,1,(0)	0,1,(0)	0,0,(0)	0,0,(0)	SRR530634(1;1),
chr11	115823034	+	canonicalC	TGCAA(C*)T	C	115823052	-18	expected	1	1	yes	no	yes	1,0,(0)	1,0,(0)	1,0,(0)	1,0,(0)	SRR530637(1;1),
chr11	117673749	+	canonicalC	CACTG(C*)C	C	117673772	-23	expected	12	12	yes	yes	yes	4,1,(7)	4,1,(7)	0,1,(0)	0,1,(0)	SRR530634(2;2),SRR530637(5;5),SRR530638(4;4),SRR530633(1;1),
chr11	119363985	+	canonicalC	CGTTG(C*)C	C	119364012	-27	expected	2	2	no	no	yes	0,0,(2)	0,0,(2)	0,0,(0)	0,0,(0)	SRR530636(2;2),
chr12	16551629	-	canonicalC	TGCTA(T*)T	T	16551602	-27	expected	1	1	yes	no	yes	0,1,(0)	0,1,(0)	0,1,(0)	0,1,(0)	SRR530639(1;1),
chr12	40943851	-	canonicalC	TGTTA(C*)A	C	40943829	-22	expected	1	1	yes	no	yes	0,1,(0)	0,1,(0)	0,1,(0)	0,1,(0)	SRR530636(1;1),
chr12	77709082	-	canonicalC	AGCTA(T*)C	T	77709058	-24	expected	1	1	yes	no	yes	1,0,(0)	1,0,(0)	1,0,(0)	1,0,(0)	SRR530635(1;1),
chr12	77714340	-	canonicalC	TGGTA(T*)C	T	77714307	-33	expected	5	2	yes	no	yes	0,5,(0)	0,2,(0)	0,5,(0)	0,2,(0)	SRR530636(5;2),
chr12	85512741	-	canonicalC	CACTG(C*)C	C	85512709	-32	expected	11	10	no	yes	yes	0,0,(11)	0,0,(10)	0,0,(0)	0,0,(0)	SRR530636(1;1),SRR530634(2;2),SRR530635(3;3),SRR530640(1;1),SRR530637(3;2),SRR530633(1;1),
chr12	103110157	-	canonicalC	TACTA(T*)A	T	103110137	-20	expected	1	1	yes	no	yes	0,1,(0)	0,1,(0)	0,1,(0)	0,1,(0)	SRR530638(1;1),
chr12	3237253	+	canonicalC	TACTT(C*)C	C	3237284	-31	expected	2	1	no	no	yes	0,0,(2)	0,0,(1)	0,0,(0)	0,0,(0)	SRR530636(2;1),
chr12	82271147	+	canonicalC	TTCTG(C*)C	C	82271172	-25	expected	1	1	no	no	yes	0,0,(1)	0,0,(1)	0,0,(0)	0,0,(0)	SRR530637(1;1),
chr12	89695160	+	canonicalC	TGCTG(C*)C	C	89695180	-20	expected	8	7	no	yes	yes	0,0,(8)	0,0,(7)	0,0,(0)	0,0,(0)	SRR530633(1;1),SRR530638(1;1),SRR530637(2;1),SRR530635(2;2),SRR530634(1;1),SRR530636(1;1),
chr12	100024075	+	canonicalC	TGTTC(C*)T	C	100024784	-709	distal	1	1	yes	no	yes	1,0,(0)	1,0,(0)	1,0,(0)	1,0,(0)	SRR530635(1;1),
chr12	110968278	+	canonicalC	TGCTG(T*)C	T	110968322	-44	expected	1	1	no	no	yes	1,0,(0)	1,0,(0)	0,0,(0)	0,0,(0)	SRR530640(1;1),
chr12	114299264	+	canonicalC	CACTG(C*)C	C	114299283	-19	expected	3	2	no	no	yes	0,0,(3)	0,0,(2)	0,0,(0)	0,0,(0)	SRR530636(3;2),
chr13	54785440	-	canonicalC	TGCTG(C*)C	C	54785436	-4	proximal	2	2	no	yes	yes	0,0,(2)	0,0,(2)	0,0,(0)	0,0,(0)	SRR530636(1;1),SRR530635(1;1),
chr13	55429868	-	canonicalC	TACTG(C*)C	C	55429845	-23	expected	2	2	no	no	yes	0,0,(2)	0,0,(2)	0,0,(0)	0,0,(0)	SRR530636(2;2),
chr13	56191241	-	canonicalC	TATTT(C*)C	C	56191218	-23	expected	1	1	no	no	yes	0,0,(1)	0,0,(1)	0,0,(0)	0,0,(0)	SRR530637(1;1),
chr13	100821105	-	canonicalC	TGTTA(T*)C	T	100821084	-21	expected	1	1	yes	no	yes	0,1,(0)	0,1,(0)	0,1,(0)	0,1,(0)	SRR530636(1;1),
chr13	108530499	-	canonicalC	TGTTA(C*)C	C	108530459	-40	expected	1	1	no	no	yes	0,0,(1)	0,0,(1)	0,0,(0)	0,0,(0)	SRR530637(1;1),
chr13	49797183	+	canonicalC	TGCCA(C*)C	C	49797212	-29	expected	1	1	no	no	yes	1,0,(0)	1,0,(0)	0,0,(0)	0,0,(0)	SRR530636(1;1),
chr14	19102291	-	canonicalC	CACTA(T*)C	T	19101830	-461	distal	1	1	yes	no	yes	1,0,(0)	1,0,(0)	1,0,(0)	1,0,(0)	SRR530635(1;1),
chr14	31831076	-	canonicalC	TGCAG(T*)C	T	31831052	-24	expected	1	1	no	no	yes	1,0,(0)	1,0,(0)	0,0,(0)	0,0,(0)	SRR530635(1;1),
chr14	32421255	-	canonicalC	TTCTG(C*)C	C	32421229	-26	expected	1	1	no	no	yes	0,0,(1)	0,0,(1)	0,0,(0)	0,0,(0)	SRR530633(1;1),
chr14	60857488	-	canonicalC	TCCTA(T*)C	T	60857463	-25	expected	1	1	no	no	yes	1,0,(0)	1,0,(0)	0,0,(0)	0,0,(0)	SRR530638(1;1),
chr14	21508840	+	canonicalC	TGCTA(T*)C	T	21508855	-15	expected	2	1	yes	no	yes	0,2,(0)	0,1,(0)	0,2,(0)	0,1,(0)	SRR530637(2;1),
chr14	21530228	+	canonicalC	TGTGG(C*)C	C	21530249	-21	expected	1	1	no	no	yes	0,0,(1)	0,0,(1)	0,0,(0)	0,0,(0)	SRR530636(1;1),
chr14	52611453	+	canonicalC	AACTG(T*)C	T	52611486	-33	expected	1	1	no	no	yes	1,0,(0)	1,0,(0)	0,0,(0)	0,0,(0)	SRR530635(1;1),
chr14	56227732	+	canonicalC	TGCAG(C*)C	C	56227757	-25	expected	1	1	yes	no	yes	1,0,(0)	1,0,(0)	1,0,(0)	1,0,(0)	SRR530634(1;1),
chr14	56243174	+	canonicalC	TGCTC(T*)C	T	56243185	-11	expected	1	1	no	no	yes	1,0,(0)	1,0,(0)	0,0,(0)	0,0,(0)	SRR530635(1;1),
chr14	121345917	+	canonicalC	TATGA(C*)C	C	121345940	-23	expected	1	1	yes	no	yes	0,1,(0)	0,1,(0)	0,1,(0)	0,1,(0)	SRR530634(1;1),
chr15	35867078	-	canonicalC	TGTTA(C*)A	C	35867039	-39	expected	1	1	no	no	yes	1,0,(0)	1,0,(0)	0,0,(0)	0,0,(0)	SRR530633(1;1),
chr15	37907860	-	canonicalC	GATTG(T*)C	T	37907837	-23	expected	1	1	yes	no	yes	0,1,(0)	0,1,(0)	0,1,(0)	0,1,(0)	SRR530637(1;1),
chr15	57963919	-	canonicalC	TACAG(C*)A	C	57963896	-23	expected	1	1	yes	no	yes	1,0,(0)	1,0,(0)	1,0,(0)	1,0,(0)	SRR530636(1;1),
chr15	63969602	-	canonicalC	TACAG(T*)C	T	63967416	-2186	distal	1	1	no	no	yes	1,0,(0)	1,0,(0)	0,0,(0)	0,0,(0)	SRR530636(1;1),
chr15	75722133	-	canonicalC	AGCTA(T*)C	T	75722112	-21	expected	2	1	yes	no	yes	0,2,(0)	0,1,(0)	0,2,(0)	0,1,(0)	SRR530638(2;1),
chr15	75747528	-	canonicalC	CACTG(C*)C	C	75747509	-19	expected	1	1	no	no	yes	0,0,(1)	0,0,(1)	0,0,(0)	0,0,(0)	SRR530636(1;1),
chr15	76538683	-	canonicalC	TGCTT(C*)C	C	76538653	-30	expected	4	4	no	yes	yes	0,0,(4)	0,0,(4)	0,0,(0)	0,0,(0)	SRR530635(3;3),SRR530633(1;1),
chr15	79908559	-	canonicalC	AGCTG(C*)T	C	79908536	-23	expected	2	1	yes	no	yes	0,0,(2)	0,0,(1)	0,0,(2)	0,0,(1)	SRR530639(2;1),
chr15	79908890	-	canonicalC	AACTG(C*)C	C	79908856	-34	expected	2	2	no	yes	yes	0,0,(2)	0,0,(2)	0,0,(0)	0,0,(0)	SRR530640(1;1),SRR530637(1;1),
chr15	82947426	-	canonicalC	TGTGA(C*)C	C	82947401	-25	expected	1	1	yes	no	yes	0,1,(0)	0,1,(0)	0,1,(0)	0,1,(0)	SRR530637(1;1),
chr15	96523049	-	canonicalC	TGCAG(C*)G	C	96523028	-21	expected	1	1	yes	no	yes	1,0,(0)	1,0,(0)	1,0,(0)	1,0,(0)	SRR530634(1;1),
chr15	6720107	+	canonicalC	TGCTT(C*)C	C	6720122	-15	expected	1	1	no	no	yes	0,0,(1)	0,0,(1)	0,0,(0)	0,0,(0)	SRR530637(1;1),
chr15	12047924	+	canonicalC	TGCCA(T*)C	T	12047993	-69	distal	2	2	no	yes	yes	0,2,(0)	0,2,(0)	0,0,(0)	0,0,(0)	SRR530635(1;1),SRR530636(1;1),
chr15	76263688	+	canonicalC	TGCAG(C*)C	C	76263703	-15	expected	2	1	no	no	yes	2,0,(0)	1,0,(0)	0,0,(0)	0,0,(0)	SRR530636(2;1),
chr15	78713677	+	canonicalC	GGCTA(C*)C	C	78713697	-20	expected	1	1	no	no	yes	0,0,(1)	0,0,(1)	0,0,(0)	0,0,(0)	SRR530634(1;1),
chr15	78716267	+	canonicalC	TGCTG(C*)C	C	78716293	-26	expected	3	2	no	yes	yes	0,0,(3)	0,0,(2)	0,0,(0)	0,0,(0)	SRR530639(2;1),SRR530640(1;1),
chr15	78760410	+	canonicalC	CACTG(C*)C	C	78760427	-17	expected	2	2	no	yes	yes	0,0,(2)	0,0,(2)	0,0,(0)	0,0,(0)	SRR530633(1;1),SRR530637(1;1),
chr15	86142137	+	canonicalC	TACTG(C*)C	C	86142156	-19	expected	1	1	no	no	yes	0,0,(1)	0,0,(1)	0,0,(0)	0,0,(0)	SRR530636(1;1),
chr16	4558752	-	canonicalC	TACTA(G*)C	G	4552100	-6652	distal	1	1	no	no	yes	0,0,(1)	0,0,(1)	0,0,(0)	0,0,(0)	SRR530638(1;1),
chr16	4769809	-	canonicalC	TTCTG(C*)C	C	4769795	-14	expected	1	1	no	no	yes	1,0,(0)	1,0,(0)	0,0,(0)	0,0,(0)	SRR530637(1;1),
chr16	17295582	-	canonicalC	GGCTA(C*)C	C	17295555	-27	expected	1	1	no	no	yes	0,0,(1)	0,0,(1)	0,0,(0)	0,0,(0)	SRR530636(1;1),
chr16	18072396	-	canonicalC	TACTC(C*)C	C	18060850	-11546	distal	1	1	no	no	yes	1,0,(0)	1,0,(0)	0,0,(0)	0,0,(0)	SRR530636(1;1),
chr16	22247352	-	canonicalC	TGCAA(T*)C	T	22247336	-16	expected	1	1	yes	no	yes	1,0,(0)	1,0,(0)	1,0,(0)	1,0,(0)	SRR530639(1;1),
chr16	33959271	-	canonicalC	TACTG(C*)C	C	33959253	-18	expected	3	3	no	yes	yes	0,0,(3)	0,0,(3)	0,0,(0)	0,0,(0)	SRR530637(1;1),SRR530634(1;1),SRR530638(1;1),
chr16	90767459	-	canonicalC	TGCAA(C*)C	C	90767433	-26	expected	1	1	yes	no	yes	1,0,(0)	1,0,(0)	1,0,(0)	1,0,(0)	SRR530636(1;1),
chr16	20229548	+	canonicalC	TTCTG(T*)C	T	20229570	-22	expected	1	1	yes	no	yes	0,0,(1)	0,0,(1)	0,0,(1)	0,0,(1)	SRR530636(1;1),
chr16	20542690	+	canonicalC	TGCTG(C*)C	C	20542711	-21	expected	2	2	no	yes	yes	0,0,(2)	0,0,(2)	0,0,(0)	0,0,(0)	SRR530635(1;1),SRR530633(1;1),
chr16	20684431	+	canonicalC	TGTTA(C*)T	C	20684480	-49	expected	2	2	no	yes	yes	0,0,(2)	0,0,(2)	0,0,(0)	0,0,(0)	SRR530638(1;1),SRR530633(1;1),
chr16	20684444	+	canonicalC	TGCTC(C*)C	C	20684480	-36	expected	4	4	no	yes	yes	0,2,(2)	0,2,(2)	0,0,(0)	0,0,(0)	SRR530640(2;2),SRR530634(1;1),SRR530635(1;1),
chr16	22869172	+	canonicalC	TACTA(T*)T	T	22869193	-21	expected	1	1	yes	no	yes	0,1,(0)	0,1,(0)	0,1,(0)	0,1,(0)	SRR530637(1;1),
chr17	3114392	-	canonicalC	TGCAA(C*)C	C	3114345	-47	expected	1	1	yes	no	yes	1,0,(0)	1,0,(0)	1,0,(0)	1,0,(0)	SRR530637(1;1),
chr17	24317644	-	canonicalC	AACTG(T*)C	T	24317621	-23	expected	1	1	no	no	yes	1,0,(0)	1,0,(0)	0,0,(0)	0,0,(0)	SRR530636(1;1),
chr17	26001006	-	canonicalC	CACTG(C*)C	C	26000984	-22	expected	1	1	no	no	yes	0,0,(1)	0,0,(1)	0,0,(0)	0,0,(0)	SRR530634(1;1),
chr17	32448062	-	canonicalC	TATTA(C*)C	C	32448039	-23	expected	1	1	no	no	yes	0,0,(1)	0,0,(1)	0,0,(0)	0,0,(0)	SRR530637(1;1),
chr17	34163437	-	canonicalC	GACTG(C*)C	C	34163415	-22	expected	1	1	yes	no	yes	1,0,(0)	1,0,(0)	1,0,(0)	1,0,(0)	SRR530635(1;1),
chr17	34251447	-	canonicalC	TGCAG(C*)T	C	34251423	-24	expected	2	2	yes	no	yes	2,0,(0)	2,0,(0)	2,0,(0)	2,0,(0)	SRR530635(2;2),
chr17	35807225	-	canonicalC	TCCTG(C*)C	C	35807203	-22	expected	1	1	no	no	yes	0,0,(1)	0,0,(1)	0,0,(0)	0,0,(0)	SRR530635(1;1),
chr17	46451286	-	canonicalC	TGCTA(C*)C	C	46451263	-23	expected	1	1	no	no	yes	0,0,(1)	0,0,(1)	0,0,(0)	0,0,(0)	SRR530635(1;1),
chr17	46880411	-	canonicalC	TGTTG(T*)C	T	46880231	-180	distal	1	1	yes	no	yes	0,1,(0)	0,1,(0)	0,1,(0)	0,1,(0)	SRR530637(1;1),
chr17	56264364	-	canonicalC	CACTG(C*)C	C	56264340	-24	expected	1	1	no	no	yes	0,0,(1)	0,0,(1)	0,0,(0)	0,0,(0)	SRR530633(1;1),
chr17	85106535	-	canonicalC	TATTA(C*)C	C	85106518	-17	expected	1	1	no	no	yes	0,0,(1)	0,0,(1)	0,0,(0)	0,0,(0)	SRR530636(1;1),
chr17	12344936	+	canonicalC	TTCTG(C*)T	C	12391617	-46681	distal	2	1	no	no	yes	0,0,(2)	0,0,(1)	0,0,(0)	0,0,(0)	SRR530638(2;1),
chr17	27251769	+	canonicalC	TGCTT(C*)C	C	27251791	-22	expected	1	1	no	no	yes	0,0,(1)	0,0,(1)	0,0,(0)	0,0,(0)	SRR530636(1;1),
chr17	29100168	+	canonicalC	TGCTT(C*)C	C	29100195	-27	expected	4	4	no	yes	yes	0,0,(4)	0,0,(4)	0,0,(0)	0,0,(0)	SRR530634(2;2),SRR530639(2;2),
chr17	32196184	+	canonicalC	TGTTA(C*)C	C	32196218	-34	expected	1	1	yes	no	yes	0,1,(0)	0,1,(0)	0,1,(0)	0,1,(0)	SRR530636(1;1),
chr17	34072060	+	canonicalC	TGCAG(T*)C	T	34072078	-18	expected	1	1	yes	no	yes	1,0,(0)	1,0,(0)	1,0,(0)	1,0,(0)	SRR530637(1;1),
chr17	35048287	+	canonicalC	CACTA(T*)C	T	35048307	-20	expected	1	1	yes	no	yes	0,1,(0)	0,1,(0)	0,1,(0)	0,1,(0)	SRR530635(1;1),
chr17	35151544	+	canonicalC	TACTG(C*)C	C	35151566	-22	expected	5	5	no	yes	yes	1,0,(4)	1,0,(4)	0,0,(0)	0,0,(0)	SRR530638(1;1),SRR530639(2;2),SRR530634(1;1),SRR530636(1;1),
chr17	35961750	+	canonicalC	GACTG(C*)C	C	35961777	-27	expected	1	1	yes	no	yes	0,0,(1)	0,0,(1)	0,0,(1)	0,0,(1)	SRR530633(1;1),
chr17	45703230	+	canonicalC	TACTG(T*)C	T	45703257	-27	expected	1	1	no	no	yes	1,0,(0)	1,0,(0)	0,0,(0)	0,0,(0)	SRR530640(1;1),
chr17	46860810	+	canonicalC	TGCCA(T*)C	T	46860867	-57	expected	1	1	yes	no	yes	0,1,(0)	0,1,(0)	0,1,(0)	0,1,(0)	SRR530635(1;1),
chr17	56238375	+	canonicalC	GGCTG(C*)C	C	56238396	-21	expected	37	35	yes	yes	yes	6,0,(31)	4,0,(31)	1,0,(0)	1,0,(0)	SRR530633(1;1),SRR530638(4;4),SRR530637(1;1),SRR530640(4;4),SRR530635(3;3),SRR530639(1;1),SRR530634(4;4),SRR530636(19;17),
chr17	56745191	+	canonicalC	AACTG(C*)C	C	56745219	-28	expected	20	19	yes	yes	yes	3,2,(15)	2,2,(15)	0,2,(1)	0,2,(1)	SRR530635(5;5),SRR530634(3;2),SRR530636(6;6),SRR530633(2;2),SRR530637(4;4),
chr17	57445067	+	canonicalC	TACTT(T*)C	T	57445085	-18	expected	1	1	no	no	yes	0,0,(1)	0,0,(1)	0,0,(0)	0,0,(0)	SRR530633(1;1),
chr17	66485597	+	canonicalC	TCCTG(C*)C	C	66485628	-31	expected	1	1	yes	no	yes	1,0,(0)	1,0,(0)	1,0,(0)	1,0,(0)	SRR530639(1;1),
chr18	60976204	-	canonicalC	TGTGA(C*)C	C	60976182	-22	expected	1	1	yes	no	yes	0,1,(0)	0,1,(0)	0,1,(0)	0,1,(0)	SRR530637(1;1),
chr18	60712471	+	canonicalC	TGATA(C*)C	C	60712498	-27	expected	1	1	yes	no	yes	0,1,(0)	0,1,(0)	0,1,(0)	0,1,(0)	SRR530635(1;1),
chr18	64086214	+	canonicalC	TGCAG(C*)G	C	64086232	-18	expected	1	1	yes	no	yes	1,0,(0)	1,0,(0)	1,0,(0)	1,0,(0)	SRR530636(1;1),
chr18	75161663	+	canonicalC	AGCTG(C*)T	C	75161677	-14	expected	1	1	no	no	yes	0,0,(1)	0,0,(1)	0,0,(0)	0,0,(0)	SRR530637(1;1),
chr19	3514745	-	canonicalC	TGCTA(T*)G	T	3514719	-26	expected	1	1	no	no	yes	1,0,(0)	1,0,(0)	0,0,(0)	0,0,(0)	SRR530636(1;1),
chr19	5994915	-	canonicalC	TGCAG(C*)C	C	5994887	-28	expected	1	1	yes	no	yes	1,0,(0)	1,0,(0)	1,0,(0)	1,0,(0)	SRR530636(1;1),
chr19	6228549	-	canonicalC	AGCTG(C*)C	C	6228531	-18	expected	1	1	no	no	yes	0,0,(1)	0,0,(1)	0,0,(0)	0,0,(0)	SRR530636(1;1),
chr19	6230291	-	canonicalC	TGCTG(C*)C	C	6230275	-16	expected	3	3	no	yes	yes	0,0,(3)	0,0,(3)	0,0,(0)	0,0,(0)	SRR530640(1;1),SRR530638(1;1),SRR530634(1;1),
chr19	6923198	-	canonicalC	TGCAG(T*)C	T	6923174	-24	expected	1	1	yes	no	yes	1,0,(0)	1,0,(0)	1,0,(0)	1,0,(0)	SRR530638(1;1),
chr19	10285192	-	canonicalC	GGCTG(C*)C	C	10285163	-29	expected	1	1	no	no	yes	1,0,(0)	1,0,(0)	0,0,(0)	0,0,(0)	SRR530640(1;1),
chr19	37372691	-	canonicalC	TACTT(T*)C	T	37372664	-27	expected	1	1	no	no	yes	0,1,(0)	0,1,(0)	0,0,(0)	0,0,(0)	SRR530635(1;1),
chr19	41295825	-	canonicalC	TGCTA(G*)A	G	41295795	-30	expected	1	1	no	no	yes	0,1,(0)	0,1,(0)	0,0,(0)	0,0,(0)	SRR530635(1;1),
chr19	42030090	-	canonicalC	TACTC(C*)C	C	42030063	-27	expected	1	1	no	no	yes	0,0,(1)	0,0,(1)	0,0,(0)	0,0,(0)	SRR530635(1;1),
chr19	44185181	-	canonicalC	TACTA(C*)T	C	44185150	-31	expected	1	1	yes	no	yes	0,1,(0)	0,1,(0)	0,1,(0)	0,1,(0)	SRR530639(1;1),
chr19	44220572	-	canonicalC	TACTC(C*)T	C	44220547	-25	expected	1	1	no	no	yes	0,1,(0)	0,1,(0)	0,0,(0)	0,0,(0)	SRR530634(1;1),
chr19	60847060	-	canonicalC	GATTA(C*)C	C	60847040	-20	expected	1	1	yes	no	yes	0,1,(0)	0,1,(0)	0,1,(0)	0,1,(0)	SRR530636(1;1),
chr19	4150412	+	canonicalC	GGCTA(C*)C	C	4150439	-27	expected	2	2	no	no	yes	0,0,(2)	0,0,(2)	0,0,(0)	0,0,(0)	SRR530638(2;2),
chr19	4620093	+	canonicalC	TATTA(C*)C	C	4620113	-20	expected	1	1	no	no	yes	0,0,(1)	0,0,(1)	0,0,(0)	0,0,(0)	SRR530634(1;1),
chr19	5493132	+	canonicalC	TGCAG(C*)C	C	5493154	-22	expected	4	4	yes	yes	yes	4,0,(0)	4,0,(0)	4,0,(0)	4,0,(0)	SRR530636(3;3),SRR530634(1;1),
chr19	6059110	+	canonicalC	TGCTA(C*)T	C	6059143	-33	expected	1	1	yes	no	yes	0,1,(0)	0,1,(0)	0,1,(0)	0,1,(0)	SRR530639(1;1),
chr19	6256136	+	canonicalC	TGTTG(T*)C	T	6256167	-31	expected	2	2	no	yes	yes	0,0,(2)	0,0,(2)	0,0,(0)	0,0,(0)	SRR530635(1;1),SRR530636(1;1),
chr19	6389143	+	canonicalC	GACTG(C*)C	C	6389159	-16	expected	1	1	no	no	yes	0,0,(1)	0,0,(1)	0,0,(0)	0,0,(0)	SRR530638(1;1),
chr19	8798827	+	canonicalC	TGTGG(C*)A	C	8798892	-65	distal	3	2	no	no	yes	0,3,(0)	0,2,(0)	0,0,(0)	0,0,(0)	SRR530636(3;2),
chr19	8921869	+	canonicalC	TGTTC(C*)C	C	8921895	-26	expected	2	1	no	no	yes	0,0,(2)	0,0,(1)	0,0,(0)	0,0,(0)	SRR530634(2;1),
chr19	8982997	+	canonicalC	AGTTG(T*)C	T	8983167	-170	distal	1	1	yes	no	yes	0,0,(1)	0,0,(1)	0,0,(1)	0,0,(1)	SRR530634(1;1),
chr19	9034203	+	canonicalC	TAGTA(C*)C	C	9034232	-29	expected	1	1	no	no	yes	0,1,(0)	0,1,(0)	0,0,(0)	0,0,(0)	SRR530639(1;1),
chr19	10698242	+	canonicalC	TACCA(C*)C	C	10699213	-971	distal	1	1	no	no	yes	1,0,(0)	1,0,(0)	0,0,(0)	0,0,(0)	SRR530635(1;1),
chr19	29196225	+	canonicalC	TGCTT(T*)C	T	29196255	-30	expected	4	2	no	no	yes	0,4,(0)	0,2,(0)	0,0,(0)	0,0,(0)	SRR530637(4;2),
chr19	29373056	+	canonicalC	TCTTA(C*)C	C	29373077	-21	expected	1	1	yes	no	yes	0,1,(0)	0,1,(0)	0,1,(0)	0,1,(0)	SRR530635(1;1),
chr19	37478566	+	canonicalC	TGTTA(T*)C	T	37478603	-37	expected	1	1	no	no	yes	0,1,(0)	0,1,(0)	0,0,(0)	0,0,(0)	SRR530636(1;1),
chr19	42013968	+	canonicalC	AACTG(T*)C	T	42014089	-121	distal	2	2	no	yes	yes	0,2,(0)	0,2,(0)	0,0,(0)	0,0,(0)	SRR530633(1;1),SRR530637(1;1),
chr19	45590323	+	canonicalC	TACCA(T*)C	T	45590347	-24	expected	1	1	yes	no	yes	0,1,(0)	0,1,(0)	0,1,(0)	0,1,(0)	SRR530633(1;1),
chr19	46446395	+	canonicalC	TGCTC(C*)T	C	46446425	-30	expected	3	3	no	yes	yes	0,2,(1)	0,2,(1)	0,0,(0)	0,0,(0)	SRR530639(1;1),SRR530636(2;2),
chr19	46525361	+	canonicalC	TACCA(C*)C	C	46525380	-19	expected	1	1	no	no	yes	1,0,(0)	1,0,(0)	0,0,(0)	0,0,(0)	SRR530636(1;1),
chr2	11685885	-	canonicalC	TGTTA(T*)T	T	11685860	-25	expected	1	1	yes	no	yes	0,1,(0)	0,1,(0)	0,1,(0)	0,1,(0)	SRR530634(1;1),
chr2	24718958	-	canonicalC	TACTC(C*)T	C	24718931	-27	expected	9	9	no	yes	yes	0,8,(1)	0,8,(1)	0,0,(0)	0,0,(0)	SRR530637(1;1),SRR530635(2;2),SRR530636(5;5),SRR530634(1;1),
chr2	24782718	-	canonicalC	TGCTC(C*)C	C	24782696	-22	expected	5	5	no	yes	yes	0,3,(2)	0,3,(2)	0,0,(0)	0,0,(0)	SRR530634(1;1),SRR530636(1;1),SRR530635(3;3),
chr2	25447956	-	canonicalC	CACTG(C*)C	C	25447923	-33	expected	2	1	no	no	yes	2,0,(0)	1,0,(0)	0,0,(0)	0,0,(0)	SRR530636(2;1),
chr2	26495010	-	canonicalC	TGCTT(T*)C	T	26494991	-19	expected	1	1	no	no	yes	0,0,(1)	0,0,(1)	0,0,(0)	0,0,(0)	SRR530636(1;1),
chr2	27305627	-	canonicalC	TGCTG(C*)C	C	27304846	-781	distal	1	1	no	no	yes	1,0,(0)	1,0,(0)	0,0,(0)	0,0,(0)	SRR530639(1;1),
chr2	32115265	-	canonicalC	TTCTG(T*)C	T	32115259	-6	proximal	1	1	yes	no	yes	0,1,(0)	0,1,(0)	0,1,(0)	0,1,(0)	SRR530637(1;1),
chr2	90906303	-	canonicalC	CGCTG(C*)C	C	90906283	-20	expected	1	1	no	no	yes	0,0,(1)	0,0,(1)	0,0,(0)	0,0,(0)	SRR530636(1;1),
chr2	112207443	-	canonicalC	TGGTA(C*)A	C	112204462	-2981	distal	1	1	yes	no	yes	0,1,(0)	0,1,(0)	0,1,(0)	0,1,(0)	SRR530635(1;1),
chr2	120335901	-	canonicalC	TGTGA(C*)C	C	120335878	-23	expected	1	1	yes	no	yes	0,1,(0)	0,1,(0)	0,1,(0)	0,1,(0)	SRR530635(1;1),
chr2	130487590	-	canonicalC	TGCTA(T*)A	T	130487574	-16	expected	1	1	yes	no	yes	0,1,(0)	0,1,(0)	0,1,(0)	0,1,(0)	SRR530637(1;1),
chr2	150664158	-	canonicalC	TCTTA(C*)C	C	150664130	-28	expected	1	1	yes	no	yes	0,1,(0)	0,1,(0)	0,1,(0)	0,1,(0)	SRR530638(1;1),
chr2	155648772	-	canonicalC	TGGTA(C*)C	C	155648754	-18	expected	1	1	yes	no	yes	0,1,(0)	0,1,(0)	0,1,(0)	0,1,(0)	SRR530637(1;1),
chr2	165620156	-	canonicalC	TGCAG(C*)T	C	165620134	-22	expected	1	1	yes	no	yes	1,0,(0)	1,0,(0)	1,0,(0)	1,0,(0)	SRR530636(1;1),
chr2	179921996	-	canonicalC	TGCAG(C*)C	C	179921981	-15	expected	1	1	yes	no	yes	1,0,(0)	1,0,(0)	1,0,(0)	1,0,(0)	SRR530636(1;1),
chr2	25198720	+	canonicalC	TCTTG(C*)C	C	25198743	-23	expected	1	1	no	no	yes	0,0,(1)	0,0,(1)	0,0,(0)	0,0,(0)	SRR530637(1;1),
chr2	26766494	+	canonicalC	CGCTG(C*)C	C	26766525	-31	expected	2	2	no	no	yes	0,0,(2)	0,0,(2)	0,0,(0)	0,0,(0)	SRR530636(2;2),
chr2	26768174	+	canonicalC	TACAG(C*)T	C	26768190	-16	expected	17	17	yes	yes	yes	16,1,(0)	16,1,(0)	15,1,(0)	15,1,(0)	SRR530636(6;6),SRR530634(7;7),SRR530637(1;1),SRR530633(3;3),
chr2	28536686	+	canonicalC	TGTAA(C*)C	C	28536710	-24	expected	1	1	yes	no	yes	1,0,(0)	1,0,(0)	1,0,(0)	1,0,(0)	SRR530636(1;1),
chr2	29833880	+	canonicalC	TGCAG(T*)C	T	29833896	-16	expected	1	1	yes	no	yes	1,0,(0)	1,0,(0)	1,0,(0)	1,0,(0)	SRR530637(1;1),
chr2	30194988	+	canonicalC	AACTG(C*)C	C	30195018	-30	expected	1	1	no	no	yes	0,0,(1)	0,0,(1)	0,0,(0)	0,0,(0)	SRR530635(1;1),
chr2	30233673	+	canonicalC	TGCTC(C*)T	C	30233693	-20	expected	3	3	yes	yes	yes	0,1,(2)	0,1,(2)	0,1,(2)	0,1,(2)	SRR530636(2;2),SRR530633(1;1),
chr2	34628666	+	canonicalC	AATTA(C*)C	C	34628689	-23	expected	1	1	no	no	yes	1,0,(0)	1,0,(0)	0,0,(0)	0,0,(0)	SRR530636(1;1),
chr2	83497142	+	canonicalC	TGCAA(T*)C	T	83497172	-30	expected	1	1	yes	no	yes	1,0,(0)	1,0,(0)	1,0,(0)	1,0,(0)	SRR530635(1;1),
chr2	119841406	+	canonicalC	AGCTG(T*)C	T	119841428	-22	expected	1	1	no	no	yes	1,0,(0)	1,0,(0)	0,0,(0)	0,0,(0)	SRR530638(1;1),
chr2	121973672	+	canonicalC	GGCTA(C*)A	C	121976608	-2936	distal	2	1	yes	no	yes	0,0,(2)	0,0,(1)	0,0,(2)	0,0,(1)	SRR530636(2;1),
chr2	130839316	+	canonicalC	TGTCA(C*)C	C	130839342	-26	expected	1	1	yes	no	yes	0,1,(0)	0,1,(0)	0,1,(0)	0,1,(0)	SRR530637(1;1),
chr2	151335220	+	canonicalC	TACTG(C*)C	C	151335244	-24	expected	2	2	no	yes	yes	0,0,(2)	0,0,(2)	0,0,(0)	0,0,(0)	SRR530638(1;1),SRR530639(1;1),
chr2	151336618	+	canonicalC	CATTA(C*)C	C	151336642	-24	expected	1	1	no	no	yes	1,0,(0)	1,0,(0)	0,0,(0)	0,0,(0)	SRR530635(1;1),
chr2	153075400	+	canonicalC	TTCTA(C*)C	C	153075416	-16	expected	1	1	yes	no	yes	1,0,(0)	1,0,(0)	1,0,(0)	1,0,(0)	SRR530635(1;1),
chr2	166843218	+	canonicalC	CACTG(T*)C	T	166843242	-24	expected	1	1	no	no	yes	1,0,(0)	1,0,(0)	0,0,(0)	0,0,(0)	SRR530640(1;1),
chr3	87861974	-	canonicalC	GACTG(C*)C	C	87861953	-21	expected	2	2	no	no	yes	0,0,(2)	0,0,(2)	0,0,(0)	0,0,(0)	SRR530635(2;2),
chr3	88898469	-	canonicalC	TGCTG(C*)C	C	88898451	-18	expected	1	1	no	no	yes	1,0,(0)	1,0,(0)	0,0,(0)	0,0,(0)	SRR530637(1;1),
chr3	90214076	-	canonicalC	TGCTC(C*)C	C	90214049	-27	expected	1	1	no	no	yes	0,0,(1)	0,0,(1)	0,0,(0)	0,0,(0)	SRR530640(1;1),
chr3	95542250	-	canonicalC	AACTG(C*)C	C	95542224	-26	expected	1	1	no	no	yes	0,0,(1)	0,0,(1)	0,0,(0)	0,0,(0)	SRR530635(1;1),
chr3	107468577	-	canonicalC	TACTG(C*)C	C	107468554	-23	expected	1	1	no	no	yes	0,0,(1)	0,0,(1)	0,0,(0)	0,0,(0)	SRR530635(1;1),
chr3	157581541	-	canonicalC	TACTT(C*)C	C	157581499	-42	expected	1	1	no	no	yes	0,0,(1)	0,0,(1)	0,0,(0)	0,0,(0)	SRR530638(1;1),
chr3	87653248	+	canonicalC	TGCTG(C*)C	C	87655644	-2396	distal	1	1	no	no	yes	0,0,(1)	0,0,(1)	0,0,(0)	0,0,(0)	SRR530637(1;1),
chr3	88497320	+	canonicalC	TCTTA(C*)C	C	88497342	-22	expected	1	1	yes	no	yes	0,1,(0)	0,1,(0)	0,1,(0)	0,1,(0)	SRR530638(1;1),
chr3	89011127	+	canonicalC	TATTG(C*)T	C	89011148	-21	expected	1	1	no	no	yes	0,0,(1)	0,0,(1)	0,0,(0)	0,0,(0)	SRR530637(1;1),
chr3	89543986	+	canonicalC	TATTA(C*)T	C	89544015	-29	expected	3	3	yes	yes	yes	2,1,(0)	2,1,(0)	0,1,(0)	0,1,(0)	SRR530636(2;2),SRR530634(1;1),
chr3	95274061	+	canonicalC	TGTGA(C*)C	C	95274098	-37	expected	1	1	yes	no	yes	0,1,(0)	0,1,(0)	0,1,(0)	0,1,(0)	SRR530634(1;1),
chr3	95292228	+	canonicalC	TATTA(C*)T	C	95292276	-48	expected	1	1	yes	no	yes	0,1,(0)	0,1,(0)	0,1,(0)	0,1,(0)	SRR530636(1;1),
chr3	108189169	+	canonicalC	GACTG(C*)C	C	108189210	-41	expected	3	2	no	yes	yes	0,0,(3)	0,0,(2)	0,0,(0)	0,0,(0)	SRR530638(1;1),SRR530636(2;1),
chr3	152114925	+	canonicalC	CACTG(T*)C	T	152114954	-29	expected	4	2	no	no	yes	4,0,(0)	2,0,(0)	0,0,(0)	0,0,(0)	SRR530637(4;2),
chr4	118062498	-	canonicalC	TTTTG(C*)C	C	118062474	-24	expected	40	36	yes	yes	yes	0,0,(40)	0,0,(36)	0,0,(1)	0,0,(1)	SRR530639(2;2),SRR530635(6;5),SRR530636(16;15),SRR530634(1;1),SRR530638(3;3),SRR530640(2;2),SRR530637(10;8),
chr4	129400051	-	canonicalC	TGTTA(C*)A	C	129400022	-29	expected	1	1	no	no	yes	0,1,(0)	0,1,(0)	0,0,(0)	0,0,(0)	SRR530636(1;1),
chr4	131353929	-	canonicalC	TGCTT(C*)T	C	131353906	-23	expected	1	1	no	no	yes	0,0,(1)	0,0,(1)	0,0,(0)	0,0,(0)	SRR530634(1;1),
chr4	32806142	+	canonicalC	TGCAG(T*)C	T	32807708	-1566	distal	1	1	no	no	yes	1,0,(0)	1,0,(0)	0,0,(0)	0,0,(0)	SRR530638(1;1),
chr4	32825850	+	canonicalC	TGTAA(C*)C	C	32825877	-27	expected	1	1	yes	no	yes	1,0,(0)	1,0,(0)	1,0,(0)	1,0,(0)	SRR530636(1;1),
chr4	34607203	+	canonicalC	TATTA(T*)T	T	34607232	-29	expected	1	1	no	no	yes	0,0,(1)	0,0,(1)	0,0,(0)	0,0,(0)	SRR530638(1;1),
chr4	46484252	+	canonicalC	TGTTA(C*)G	C	46484269	-17	expected	1	1	yes	no	yes	0,1,(0)	0,1,(0)	0,1,(0)	0,1,(0)	SRR530636(1;1),
chr4	131866345	+	canonicalC	TACTT(T*)C	T	131866365	-20	expected	2	2	no	yes	yes	0,1,(1)	0,1,(1)	0,0,(0)	0,0,(0)	SRR530637(1;1),SRR530640(1;1),
chr4	134028691	+	canonicalC	TACTT(C*)A	C	134028718	-27	expected	1	1	no	no	yes	0,0,(1)	0,0,(1)	0,0,(0)	0,0,(0)	SRR530634(1;1),
chr4	140877708	+	canonicalC	GGCTA(C*)A	C	140877977	-269	distal	1	1	no	no	yes	0,0,(1)	0,0,(1)	0,0,(0)	0,0,(0)	SRR530640(1;1),
chr4	155274371	+	canonicalC	TACTG(C*)C	C	155274395	-24	expected	2	2	no	no	yes	0,0,(2)	0,0,(2)	0,0,(0)	0,0,(0)	SRR530636(2;2),
chr5	23949300	-	canonicalC	TCTTA(C*)C	C	23949274	-26	expected	1	1	yes	no	yes	0,1,(0)	0,1,(0)	0,1,(0)	0,1,(0)	SRR530636(1;1),
chr5	28108044	-	canonicalC	TGCAA(T*)C	T	28108025	-19	expected	1	1	no	no	yes	0,1,(0)	0,1,(0)	0,0,(0)	0,0,(0)	SRR530638(1;1),
chr5	34978440	-	canonicalC	TCCTG(C*)C	C	34978416	-24	expected	26	26	yes	yes	yes	1,1,(24)	1,1,(24)	0,1,(0)	0,1,(0)	SRR530639(3;3),SRR530635(5;5),SRR530636(4;4),SRR530634(4;4),SRR530633(1;1),SRR530638(5;5),SRR530640(1;1),SRR530637(3;3),
chr5	42183201	-	canonicalC	CATTG(C*)C	C	42183176	-25	expected	1	1	no	no	yes	0,0,(1)	0,0,(1)	0,0,(0)	0,0,(0)	SRR530638(1;1),
chr5	130466040	-	canonicalC	TACTC(C*)T	C	130466022	-18	expected	1	1	no	no	yes	0,1,(0)	0,1,(0)	0,0,(0)	0,0,(0)	SRR530638(1;1),
chr5	135079370	-	canonicalC	TCCTG(C*)C	C	135079350	-20	expected	1	1	no	no	yes	0,0,(1)	0,0,(1)	0,0,(0)	0,0,(0)	SRR530637(1;1),
chr5	138096672	-	canonicalC	AGCTG(C*)C	C	138096640	-32	expected	2	2	no	no	yes	0,0,(2)	0,0,(2)	0,0,(0)	0,0,(0)	SRR530636(2;2),
chr5	138610724	-	canonicalC	TCCTG(C*)C	C	138610701	-23	expected	3	3	yes	yes	yes	0,1,(2)	0,1,(2)	0,1,(0)	0,1,(0)	SRR530636(1;1),SRR530637(2;2),
chr5	140240387	-	canonicalC	TGATA(C*)A	C	140240361	-26	expected	1	1	no	no	yes	1,0,(0)	1,0,(0)	0,0,(0)	0,0,(0)	SRR530635(1;1),
chr5	30092015	+	canonicalC	TGTAG(C*)T	C	30092045	-30	expected	1	1	yes	no	yes	1,0,(0)	1,0,(0)	1,0,(0)	1,0,(0)	SRR530636(1;1),
chr5	31178140	+	canonicalC	CACTG(C*)C	C	31178162	-22	expected	1	1	no	no	yes	0,0,(1)	0,0,(1)	0,0,(0)	0,0,(0)	SRR530636(1;1),
chr5	31361329	+	canonicalC	AGCTG(C*)C	C	31361353	-24	expected	1	1	no	no	yes	0,0,(1)	0,0,(1)	0,0,(0)	0,0,(0)	SRR530636(1;1),
chr5	110756693	+	canonicalC	TGTTA(C*)A	C	110756720	-27	expected	1	1	no	no	yes	0,1,(0)	0,1,(0)	0,0,(0)	0,0,(0)	SRR530633(1;1),
chr5	114811216	+	canonicalC	CGCTG(C*)C	C	114811235	-19	expected	1	1	yes	no	yes	1,0,(0)	1,0,(0)	1,0,(0)	1,0,(0)	SRR530638(1;1),
chr5	123169115	+	canonicalC	TGCTG(C*)C	C	123169138	-23	expected	1	1	no	no	yes	0,0,(1)	0,0,(1)	0,0,(0)	0,0,(0)	SRR530636(1;1),
chr5	137961751	+	canonicalC	TTTTG(C*)C	C	137961774	-23	expected	2	2	no	no	yes	0,0,(2)	0,0,(2)	0,0,(0)	0,0,(0)	SRR530637(2;2),
chr5	138613968	+	canonicalC	TACTA(C*)A	C	138614014	-46	expected	1	1	yes	no	yes	0,1,(0)	0,1,(0)	0,1,(0)	0,1,(0)	SRR530639(1;1),
chr5	139699525	+	canonicalC	TGCTT(C*)C	C	139699547	-22	expected	3	1	no	no	yes	0,0,(3)	0,0,(1)	0,0,(0)	0,0,(0)	SRR530636(3;1),
chr5	145885418	+	canonicalC	TGCTA(C*)C	C	145885455	-37	expected	1	1	no	no	yes	0,0,(1)	0,0,(1)	0,0,(0)	0,0,(0)	SRR530636(1;1),
chr6	29089645	-	canonicalC	TACTA(C*)A	C	29089626	-19	expected	2	2	yes	yes	yes	1,1,(0)	1,1,(0)	0,1,(0)	0,1,(0)	SRR530637(1;1),SRR530639(1;1),
chr6	29529386	-	canonicalC	TGCCA(T*)C	T	29528601	-785	distal	1	1	no	no	yes	0,0,(1)	0,0,(1)	0,0,(0)	0,0,(0)	SRR530635(1;1),
chr6	30433010	-	canonicalC	TTCTA(C*)T	C	30432985	-25	expected	1	1	yes	no	yes	0,1,(0)	0,1,(0)	0,1,(0)	0,1,(0)	SRR530634(1;1),
chr6	39350522	-	canonicalC	TGCAG(C*)C	C	39350504	-18	expected	2	2	yes	yes	yes	1,0,(1)	1,0,(1)	1,0,(0)	1,0,(0)	SRR530639(1;1),SRR530635(1;1),
chr6	41639670	-	canonicalC	TCTTA(C*)C	C	41639637	-33	expected	1	1	no	no	yes	0,1,(0)	0,1,(0)	0,0,(0)	0,0,(0)	SRR530635(1;1),
chr6	87795345	-	canonicalC	TATAG(T*)C	T	87795314	-31	expected	2	2	yes	no	yes	2,0,(0)	2,0,(0)	2,0,(0)	2,0,(0)	SRR530639(2;2),
chr6	90978918	-	canonicalC	TACCA(C*)C	C	90978895	-23	expected	1	1	no	no	yes	1,0,(0)	1,0,(0)	0,0,(0)	0,0,(0)	SRR530634(1;1),
chr6	92149949	-	canonicalC	TGCTA(C*)C	C	92149929	-20	expected	1	1	no	no	yes	1,0,(0)	1,0,(0)	0,0,(0)	0,0,(0)	SRR530638(1;1),
chr6	97153611	-	canonicalC	TGCAG(C*)T	C	97153588	-23	expected	1	1	yes	no	yes	1,0,(0)	1,0,(0)	1,0,(0)	1,0,(0)	SRR530637(1;1),
chr6	124655880	-	canonicalC	TGCTC(T*)C	T	124655860	-20	expected	1	1	yes	no	yes	0,1,(0)	0,1,(0)	0,1,(0)	0,1,(0)	SRR530640(1;1),
chr6	48362249	+	canonicalC	GACTA(C*)C	C	48362272	-23	expected	1	1	yes	no	yes	0,1,(0)	0,1,(0)	0,1,(0)	0,1,(0)	SRR530634(1;1),
chr6	66490382	+	canonicalC	TACTA(T*)T	T	66490419	-37	expected	1	1	yes	no	yes	0,1,(0)	0,1,(0)	0,1,(0)	0,1,(0)	SRR530634(1;1),
chr6	83005867	+	canonicalC	TACTA(C*)T	C	83005891	-24	expected	2	2	yes	yes	yes	0,2,(0)	0,2,(0)	0,2,(0)	0,2,(0)	SRR530637(1;1),SRR530638(1;1),
chr6	83059294	+	canonicalC	CGCTG(C*)C	C	83059307	-13	expected	1	1	yes	no	yes	1,0,(0)	1,0,(0)	1,0,(0)	1,0,(0)	SRR530634(1;1),
chr6	85392086	+	canonicalC	TGCTT(C*)C	C	85392104	-18	expected	1	1	no	no	yes	0,0,(1)	0,0,(1)	0,0,(0)	0,0,(0)	SRR530633(1;1),
chr6	85414744	+	canonicalC	TGTAA(C*)C	C	85414773	-29	expected	1	1	yes	no	yes	1,0,(0)	1,0,(0)	1,0,(0)	1,0,(0)	SRR530636(1;1),
chr6	87845896	+	canonicalC	TACTG(C*)C	C	87845920	-24	expected	54	46	yes	yes	yes	1,3,(50)	1,3,(42)	1,3,(3)	1,3,(3)	SRR530637(14;11),SRR530640(2;2),SRR530638(12;10),SRR530633(3;3),SRR530636(12;10),SRR530634(1;1),SRR530635(10;9),
chr6	113219463	+	canonicalC	TACAG(C*)T	C	113219494	-31	expected	1	1	yes	no	yes	1,0,(0)	1,0,(0)	1,0,(0)	1,0,(0)	SRR530638(1;1),
chr6	115515892	+	canonicalC	TGTTG(C*)A	C	115515894	-2	proximal	1	1	yes	no	yes	0,0,(1)	0,0,(1)	0,0,(1)	0,0,(1)	SRR530633(1;1),
chr6	124782141	+	canonicalC	TGCAG(C*)T	C	124782163	-22	expected	1	1	yes	no	yes	1,0,(0)	1,0,(0)	1,0,(0)	1,0,(0)	SRR530636(1;1),
chr6	124996900	+	canonicalC	TGTGA(C*)C	C	124996921	-21	expected	1	1	no	no	yes	0,1,(0)	0,1,(0)	0,0,(0)	0,0,(0)	SRR530636(1;1),
chr6	125050793	+	canonicalC	TGCTC(C*)A	C	125050795	-2	proximal	2	2	no	yes	yes	0,1,(1)	0,1,(1)	0,0,(0)	0,0,(0)	SRR530636(1;1),SRR530638(1;1),
chr6	146715917	+	canonicalC	TATTA(T*)C	T	146715940	-23	expected	1	1	yes	no	yes	0,1,(0)	0,1,(0)	0,1,(0)	0,1,(0)	SRR530636(1;1),
chr7	4763185	-	canonicalC	GGCTG(C*)T	C	4763158	-27	expected	1	1	no	no	yes	0,0,(1)	0,0,(1)	0,0,(0)	0,0,(0)	SRR530637(1;1),
chr7	19844840	-	canonicalC	TGTAG(C*)T	C	19844816	-24	expected	3	3	yes	yes	yes	3,0,(0)	3,0,(0)	3,0,(0)	3,0,(0)	SRR530636(1;1),SRR530638(2;2),
chr7	25882812	-	canonicalC	CGCTG(C*)C	C	25882786	-26	expected	1	1	no	no	yes	0,0,(1)	0,0,(1)	0,0,(0)	0,0,(0)	SRR530637(1;1),
chr7	26499521	-	canonicalC	GGCTG(C*)C	C	26499501	-20	expected	7	5	no	yes	yes	0,0,(7)	0,0,(5)	0,0,(0)	0,0,(0)	SRR530638(5;3),SRR530636(2;2),
chr7	27959621	-	canonicalC	TGCTG(C*)C	C	27959595	-26	expected	7	7	yes	yes	yes	1,0,(6)	1,0,(6)	1,0,(0)	1,0,(0)	SRR530636(2;2),SRR530637(1;1),SRR530638(2;2),SRR530635(2;2),
chr7	28208867	-	canonicalC	TGCTG(C*)C	C	28208843	-24	expected	1	1	no	no	yes	0,0,(1)	0,0,(1)	0,0,(0)	0,0,(0)	SRR530640(1;1),
chr7	29940851	-	canonicalC	TGCTT(C*)C	C	29940828	-23	expected	1	1	no	no	yes	0,0,(1)	0,0,(1)	0,0,(0)	0,0,(0)	SRR530637(1;1),
chr7	30032774	-	canonicalC	TCCTA(C*)C	C	30032753	-21	expected	1	1	no	no	yes	0,0,(1)	0,0,(1)	0,0,(0)	0,0,(0)	SRR530636(1;1),
chr7	52381648	-	canonicalC	TGCTG(C*)T	C	52381607	-41	expected	2	2	no	no	yes	2,0,(0)	2,0,(0)	0,0,(0)	0,0,(0)	SRR530640(2;2),
chr7	52402205	-	canonicalC	TTTTG(C*)C	C	52402178	-27	expected	1	1	no	no	yes	0,0,(1)	0,0,(1)	0,0,(0)	0,0,(0)	SRR530636(1;1),
chr7	52680201	-	canonicalC	GGCTG(C*)C	C	52680175	-26	expected	1	1	no	no	yes	0,0,(1)	0,0,(1)	0,0,(0)	0,0,(0)	SRR530634(1;1),
chr7	108445766	-	canonicalC	TGCCA(C*)C	C	108445747	-19	expected	4	4	no	no	yes	4,0,(0)	4,0,(0)	0,0,(0)	0,0,(0)	SRR530637(4;4),
chr7	125303363	-	canonicalC	TATAG(T*)C	T	125303334	-29	expected	1	1	yes	no	yes	1,0,(0)	1,0,(0)	1,0,(0)	1,0,(0)	SRR530637(1;1),
chr7	125350571	-	canonicalC	TGATG(C*)C	C	125350528	-43	expected	1	1	no	no	yes	0,0,(1)	0,0,(1)	0,0,(0)	0,0,(0)	SRR530634(1;1),
chr7	130444139	-	canonicalC	TGCTC(C*)T	C	130444116	-23	expected	2	2	no	no	yes	0,2,(0)	0,2,(0)	0,0,(0)	0,0,(0)	SRR530637(2;2),
chr7	132785267	-	canonicalC	TGTAA(C*)C	C	132785247	-20	expected	1	1	yes	no	yes	0,1,(0)	0,1,(0)	0,1,(0)	0,1,(0)	SRR530635(1;1),
chr7	132812952	-	canonicalC	CACTG(C*)C	C	132812932	-20	expected	4	4	no	no	yes	0,0,(4)	0,0,(4)	0,0,(0)	0,0,(0)	SRR530636(4;4),
chr7	133248475	-	canonicalC	TGCTG(C*)C	C	133248448	-27	expected	2	1	no	no	yes	0,0,(2)	0,0,(1)	0,0,(0)	0,0,(0)	SRR530636(2;1),
chr7	133844633	-	canonicalC	TGTTG(C*)T	C	133844610	-23	expected	1	1	no	no	yes	1,0,(0)	1,0,(0)	0,0,(0)	0,0,(0)	SRR530633(1;1),
chr7	135418242	-	canonicalC	CGCTG(C*)C	C	135418237	-5	proximal	4	4	no	no	yes	0,0,(4)	0,0,(4)	0,0,(0)	0,0,(0)	SRR530636(4;4),
chr7	135847165	-	canonicalC	CACTG(C*)C	C	135847142	-23	expected	4	3	no	no	yes	0,0,(4)	0,0,(3)	0,0,(0)	0,0,(0)	SRR530636(4;3),
chr7	19671650	+	canonicalC	TGCCA(C*)C	C	19671680	-30	expected	2	2	no	no	yes	0,0,(2)	0,0,(2)	0,0,(0)	0,0,(0)	SRR530639(2;2),
chr7	28971343	+	canonicalC	TCTTA(C*)C	C	28971380	-37	expected	3	3	yes	yes	yes	0,3,(0)	0,3,(0)	0,3,(0)	0,3,(0)	SRR530636(1;1),SRR530634(1;1),SRR530633(1;1),
chr7	86578046	+	canonicalC	GGCTG(C*)C	C	86578068	-22	expected	2	1	no	no	yes	2,0,(0)	1,0,(0)	0,0,(0)	0,0,(0)	SRR530636(2;1),
chr7	87406687	+	canonicalC	TTTTG(C*)C	C	87406706	-19	expected	1	1	no	no	yes	0,0,(1)	0,0,(1)	0,0,(0)	0,0,(0)	SRR530638(1;1),
chr7	109229973	+	canonicalC	AGCTG(C*)C	C	109229996	-23	expected	3	3	no	yes	yes	1,0,(2)	1,0,(2)	0,0,(0)	0,0,(0)	SRR530638(1;1),SRR530639(1;1),SRR530635(1;1),
chr7	132774185	+	canonicalC	TGCTG(C*)C	C	132774218	-33	expected	4	4	no	yes	yes	1,0,(3)	1,0,(3)	0,0,(0)	0,0,(0)	SRR530638(1;1),SRR530637(3;3),
chr7	133633029	+	canonicalC	TTCTG(C*)C	C	133633065	-36	expected	1	1	yes	no	yes	0,0,(1)	0,0,(1)	0,0,(1)	0,0,(1)	SRR530637(1;1),
chr7	134445499	+	canonicalC	TGCCA(C*)C	C	134445524	-25	expected	2	2	no	no	yes	2,0,(0)	2,0,(0)	0,0,(0)	0,0,(0)	SRR530637(2;2),
chr7	147117870	+	canonicalC	TGTTG(T*)G	T	147118414	-544	distal	1	1	no	no	yes	0,1,(0)	0,1,(0)	0,0,(0)	0,0,(0)	SRR530638(1;1),
chr7	148418283	+	canonicalC	CACTG(C*)C	C	148418317	-34	expected	1	1	no	no	yes	0,0,(1)	0,0,(1)	0,0,(0)	0,0,(0)	SRR530637(1;1),
chr8	11542026	-	canonicalC	TGGTG(C*)C	C	11542003	-23	expected	1	1	no	no	yes	0,0,(1)	0,0,(1)	0,0,(0)	0,0,(0)	SRR530634(1;1),
chr8	47139853	-	canonicalC	TGCTG(C*)C	C	47139834	-19	expected	1	1	no	no	yes	0,0,(1)	0,0,(1)	0,0,(0)	0,0,(0)	SRR530636(1;1),
chr8	72433893	-	canonicalC	CACTA(C*)C	C	72433873	-20	expected	2	2	no	yes	yes	0,0,(2)	0,0,(2)	0,0,(0)	0,0,(0)	SRR530635(1;1),SRR530636(1;1),
chr8	73307733	-	canonicalC	GGCTG(C*)C	C	73307708	-25	expected	2	2	no	yes	yes	0,0,(2)	0,0,(2)	0,0,(0)	0,0,(0)	SRR530638(1;1),SRR530637(1;1),
chr8	98263852	-	canonicalC	TTCTA(C*)C	C	98263827	-25	expected	1	1	no	no	yes	0,0,(1)	0,0,(1)	0,0,(0)	0,0,(0)	SRR530633(1;1),
chr8	108228450	-	canonicalC	TAGTG(C*)C	C	108228414	-36	expected	1	1	no	no	yes	0,0,(1)	0,0,(1)	0,0,(0)	0,0,(0)	SRR530637(1;1),
chr8	108296130	-	canonicalC	TATTC(C*)C	C	108296106	-24	expected	1	1	no	no	yes	0,0,(1)	0,0,(1)	0,0,(0)	0,0,(0)	SRR530636(1;1),
chr8	108483408	-	canonicalC	TCCTG(C*)C	C	108483389	-19	expected	3	2	no	yes	yes	0,0,(3)	0,0,(2)	0,0,(0)	0,0,(0)	SRR530635(1;1),SRR530633(2;1),
chr8	109940170	-	canonicalC	TGCAG(C*)C	C	109940150	-20	expected	2	2	yes	yes	yes	2,0,(0)	2,0,(0)	2,0,(0)	2,0,(0)	SRR530637(1;1),SRR530633(1;1),
chr8	114364406	-	canonicalC	TGCTT(C*)C	C	114364385	-21	expected	3	3	no	yes	yes	0,0,(3)	0,0,(3)	0,0,(0)	0,0,(0)	SRR530638(1;1),SRR530637(1;1),SRR530634(1;1),
chr8	124322153	-	canonicalC	TACAG(C*)T	C	124322136	-17	expected	2	1	yes	no	yes	2,0,(0)	1,0,(0)	2,0,(0)	1,0,(0)	SRR530634(2;1),
chr8	125009877	-	canonicalC	TACTT(C*)C	C	125009856	-21	expected	1	1	no	no	yes	0,0,(1)	0,0,(1)	0,0,(0)	0,0,(0)	SRR530640(1;1),
chr8	125020511	-	canonicalC	TGCTG(C*)C	C	125020479	-32	expected	1	1	yes	no	yes	1,0,(0)	1,0,(0)	1,0,(0)	1,0,(0)	SRR530635(1;1),
chr8	125157431	-	canonicalC	GACTG(C*)C	C	125157408	-23	expected	1	1	no	no	yes	0,0,(1)	0,0,(1)	0,0,(0)	0,0,(0)	SRR530633(1;1),
chr8	125423746	-	canonicalC	AGCTG(C*)C	C	125423707	-39	expected	2	2	no	no	yes	0,0,(2)	0,0,(2)	0,0,(0)	0,0,(0)	SRR530634(2;2),
chr8	125730252	-	canonicalC	TACTG(C*)C	C	125730231	-21	expected	15	12	yes	yes	yes	0,4,(11)	0,2,(10)	0,4,(0)	0,2,(0)	SRR530640(1;1),SRR530638(3;2),SRR530634(4;4),SRR530636(7;5),
chr8	12851007	+	canonicalC	TGATG(T*)C	T	12851036	-29	expected	1	1	no	no	yes	0,0,(1)	0,0,(1)	0,0,(0)	0,0,(0)	SRR530634(1;1),
chr8	24231354	+	canonicalC	TGCAA(C*)C	C	24231371	-17	expected	2	1	yes	no	yes	2,0,(0)	1,0,(0)	2,0,(0)	1,0,(0)	SRR530636(2;1),
chr8	83033318	+	canonicalC	TGTAA(C*)C	C	83033343	-25	expected	1	1	yes	no	yes	0,1,(0)	0,1,(0)	0,1,(0)	0,1,(0)	SRR530635(1;1),
chr8	86134461	+	canonicalC	CACTG(C*)C	C	86134487	-26	expected	2	2	no	no	yes	0,0,(2)	0,0,(2)	0,0,(0)	0,0,(0)	SRR530636(2;2),
chr8	87223012	+	canonicalC	CACTG(C*)C	C	87223037	-25	expected	2	2	no	yes	yes	0,0,(2)	0,0,(2)	0,0,(0)	0,0,(0)	SRR530636(1;1),SRR530637(1;1),
chr8	87227778	+	canonicalC	TGCTA(T*)C	T	87227793	-15	expected	1	1	yes	no	yes	0,1,(0)	0,1,(0)	0,1,(0)	0,1,(0)	SRR530633(1;1),
chr8	90845959	+	canonicalC	GGCTG(T*)C	T	90845995	-36	expected	1	1	no	no	yes	1,0,(0)	1,0,(0)	0,0,(0)	0,0,(0)	SRR530634(1;1),
chr8	97621830	+	canonicalC	TGCTG(C*)C	C	97621854	-24	expected	6	5	no	no	yes	0,0,(6)	0,0,(5)	0,0,(0)	0,0,(0)	SRR530636(6;5),
chr8	109441462	+	canonicalC	TATAG(T*)C	T	109441481	-19	expected	1	1	yes	no	yes	1,0,(0)	1,0,(0)	1,0,(0)	1,0,(0)	SRR530633(1;1),
chr8	120124996	+	canonicalC	AACTG(C*)C	C	120125027	-31	expected	1	1	no	no	yes	0,0,(1)	0,0,(1)	0,0,(0)	0,0,(0)	SRR530640(1;1),
chr8	124858797	+	canonicalC	TGTTC(C*)T	C	124858831	-34	expected	1	1	yes	no	yes	1,0,(0)	1,0,(0)	1,0,(0)	1,0,(0)	SRR530636(1;1),
chr8	124932117	+	canonicalC	CACTG(C*)C	C	124932142	-25	expected	5	5	no	yes	yes	1,0,(4)	1,0,(4)	0,0,(0)	0,0,(0)	SRR530636(2;2),SRR530635(2;2),SRR530638(1;1),
chr8	125000389	+	canonicalC	TTCTG(C*)C	C	125000414	-25	expected	5	5	no	yes	yes	0,0,(5)	0,0,(5)	0,0,(0)	0,0,(0)	SRR530634(1;1),SRR530636(2;2),SRR530638(1;1),SRR530637(1;1),
chr8	125001061	+	canonicalC	TGCTG(C*)C	C	125001076	-15	expected	36	31	no	yes	yes	0,0,(36)	0,0,(31)	0,0,(0)	0,0,(0)	SRR530640(1;1),SRR530637(3;3),SRR530633(3;3),SRR530638(3;3),SRR530636(16;12),SRR530634(1;1),SRR530635(8;7),SRR530639(1;1),
chr9	21081105	-	canonicalC	TGCTG(C*)C	C	21081079	-26	expected	1	1	no	no	yes	0,0,(1)	0,0,(1)	0,0,(0)	0,0,(0)	SRR530633(1;1),
chr9	32235673	-	canonicalC	TTCTG(C*)C	C	32235650	-23	expected	2	2	no	yes	yes	1,0,(1)	1,0,(1)	0,0,(0)	0,0,(0)	SRR530637(1;1),SRR530638(1;1),
chr9	34855133	-	canonicalC	TGCTA(C*)C	C	34855104	-29	expected	1	1	yes	no	yes	0,1,(0)	0,1,(0)	0,1,(0)	0,1,(0)	SRR530635(1;1),
chr9	34998992	-	canonicalC	AACTG(C*)C	C	34998967	-25	expected	3	3	no	yes	yes	0,0,(3)	0,0,(3)	0,0,(0)	0,0,(0)	SRR530637(2;2),SRR530638(1;1),
chr9	44619185	-	canonicalC	TACTG(C*)C	C	44619163	-22	expected	2	2	no	yes	yes	0,0,(2)	0,0,(2)	0,0,(0)	0,0,(0)	SRR530635(1;1),SRR530636(1;1),
chr9	58077233	-	canonicalC	TGCTG(C*)C	C	58077214	-19	expected	15	14	no	yes	yes	2,0,(13)	2,0,(12)	0,0,(0)	0,0,(0)	SRR530639(3;3),SRR530635(3;3),SRR530636(1;1),SRR530634(2;2),SRR530638(2;1),SRR530633(1;1),SRR530640(1;1),SRR530637(2;2),
chr9	59256046	-	canonicalC	TGCAG(T*)C	T	59255754	-292	distal	1	1	no	no	yes	1,0,(0)	1,0,(0)	0,0,(0)	0,0,(0)	SRR530637(1;1),
chr9	85622421	-	canonicalC	TACAG(T*)C	T	85622400	-21	expected	1	1	yes	no	yes	1,0,(0)	1,0,(0)	1,0,(0)	1,0,(0)	SRR530637(1;1),
chr9	88274443	-	canonicalC	TTCTG(T*)C	T	88274404	-39	expected	1	1	no	no	yes	0,0,(1)	0,0,(1)	0,0,(0)	0,0,(0)	SRR530636(1;1),
chr9	106339148	-	canonicalC	TGCTT(C*)C	C	106339131	-17	expected	1	1	no	no	yes	0,0,(1)	0,0,(1)	0,0,(0)	0,0,(0)	SRR530635(1;1),
chr9	106376874	-	canonicalC	TGCTG(C*)C	C	106376866	-8	proximal	1	1	no	no	yes	0,0,(1)	0,0,(1)	0,0,(0)	0,0,(0)	SRR530637(1;1),
chr9	107991923	-	canonicalC	TGCTA(C*)A	C	107991900	-23	expected	1	1	yes	no	yes	0,1,(0)	0,1,(0)	0,1,(0)	0,1,(0)	SRR530635(1;1),
chr9	13640302	+	canonicalC	TATGA(C*)C	C	13640328	-26	expected	1	1	yes	no	yes	0,1,(0)	0,1,(0)	0,1,(0)	0,1,(0)	SRR530635(1;1),
chr9	15110958	+	canonicalC	TGCTG(C*)C	C	15112171	-1213	distal	1	1	no	no	yes	0,0,(1)	0,0,(1)	0,0,(0)	0,0,(0)	SRR530636(1;1),
chr9	15111302	+	canonicalC	TGTAG(T*)C	T	15112171	-869	distal	1	1	yes	no	yes	1,0,(0)	1,0,(0)	1,0,(0)	1,0,(0)	SRR530638(1;1),
chr9	20675615	+	canonicalC	TTCTG(C*)C	C	20675640	-25	expected	1	1	no	no	yes	0,0,(1)	0,0,(1)	0,0,(0)	0,0,(0)	SRR530638(1;1),
chr9	21309890	+	canonicalC	TACAG(C*)C	C	21309907	-17	expected	1	1	yes	no	yes	1,0,(0)	1,0,(0)	1,0,(0)	1,0,(0)	SRR530636(1;1),
chr9	21310742	+	canonicalC	CACTA(C*)C	C	21310776	-34	expected	2	2	no	yes	yes	0,0,(2)	0,0,(2)	0,0,(0)	0,0,(0)	SRR530637(1;1),SRR530635(1;1),
chr9	21379838	+	canonicalC	TGCTA(T*)T	T	21379857	-19	expected	2	1	yes	no	yes	0,2,(0)	0,1,(0)	0,2,(0)	0,1,(0)	SRR530636(2;1),
chr9	22042093	+	canonicalC	TATTA(T*)T	T	22042118	-25	expected	4	2	yes	no	yes	0,4,(0)	0,2,(0)	0,4,(0)	0,2,(0)	SRR530636(4;2),
chr9	25113684	+	canonicalC	TATTA(C*)C	C	25113710	-26	expected	2	2	no	no	yes	0,2,(0)	0,2,(0)	0,0,(0)	0,0,(0)	SRR530634(2;2),
chr9	56979224	+	canonicalC	TGCTG(C*)C	C	56979338	-114	distal	1	1	yes	no	yes	0,1,(0)	0,1,(0)	0,1,(0)	0,1,(0)	SRR530635(1;1),
chr9	59519349	+	canonicalC	TGCTT(C*)C	C	59519381	-32	expected	1	1	no	no	yes	0,0,(1)	0,0,(1)	0,0,(0)	0,0,(0)	SRR530637(1;1),
chr9	59519700	+	canonicalC	TTTTA(C*)C	C	59519727	-27	expected	1	1	yes	no	yes	0,0,(1)	0,0,(1)	0,0,(1)	0,0,(1)	SRR530637(1;1),
chr9	62225327	+	canonicalC	GGCTG(C*)C	C	62225360	-33	expected	3	3	no	yes	yes	0,0,(3)	0,0,(3)	0,0,(0)	0,0,(0)	SRR530635(2;2),SRR530637(1;1),
chr9	90066298	+	canonicalC	TGTTA(C*)T	C	90066311	-13	expected	1	1	yes	no	yes	0,1,(0)	0,1,(0)	0,1,(0)	0,1,(0)	SRR530637(1;1),
chr9	106362957	+	canonicalC	TGCTG(C*)C	C	106362981	-24	expected	4	2	no	yes	yes	0,0,(4)	0,0,(2)	0,0,(0)	0,0,(0)	SRR530636(1;1),SRR530637(3;1),
chr9	107861751	+	canonicalC	TGCTC(C*)C	C	107861769	-18	expected	1	1	no	no	yes	0,1,(0)	0,1,(0)	0,0,(0)	0,0,(0)	SRR530633(1;1),
chr9	110274679	+	canonicalC	TTCTA(C*)C	C	110274700	-21	expected	2	2	yes	no	yes	0,2,(0)	0,2,(0)	0,2,(0)	0,2,(0)	SRR530635(2;2),
chrX	7721583	-	canonicalC	GACTG(C*)C	C	7721073	-510	distal	1	1	no	no	yes	0,0,(1)	0,0,(1)	0,0,(0)	0,0,(0)	SRR530635(1;1),
chrX	71175883	-	canonicalC	TGCTT(C*)C	C	71175856	-27	expected	1	1	no	no	yes	0,0,(1)	0,0,(1)	0,0,(0)	0,0,(0)	SRR530634(1;1),
chrX	71198028	-	canonicalC	TACTG(C*)C	C	71198005	-23	expected	10	10	yes	yes	yes	0,1,(9)	0,1,(9)	0,1,(0)	0,1,(0)	SRR530635(3;3),SRR530636(1;1),SRR530634(1;1),SRR530638(2;2),SRR530633(1;1),SRR530637(2;2),
chrX	71470617	-	canonicalC	TTCTG(C*)C	C	71470597	-20	expected	8	8	no	yes	yes	0,0,(8)	0,0,(8)	0,0,(0)	0,0,(0)	SRR530640(3;3),SRR530635(2;2),SRR530634(1;1),SRR530636(2;2),
chrX	71656803	-	canonicalC	TGTTA(C*)C	C	71656783	-20	expected	1	1	yes	no	yes	0,1,(0)	0,1,(0)	0,1,(0)	0,1,(0)	SRR530633(1;1),
chrX	130773147	-	canonicalC	TTCTG(C*)C	C	130773125	-22	expected	1	1	no	no	yes	1,0,(0)	1,0,(0)	0,0,(0)	0,0,(0)	SRR530634(1;1),
chrX	131342077	-	canonicalC	TACTT(T*)C	T	131342052	-25	expected	7	4	yes	no	yes	0,0,(7)	0,0,(4)	0,0,(7)	0,0,(4)	SRR530636(7;4),
chrX	7387705	+	canonicalC	TGCTG(C*)C	C	7387733	-28	expected	2	2	no	yes	yes	0,0,(2)	0,0,(2)	0,0,(0)	0,0,(0)	SRR530635(1;1),SRR530636(1;1),
chrX	20214516	+	canonicalC	GACTA(C*)C	C	20214551	-35	expected	1	1	no	no	yes	0,0,(1)	0,0,(1)	0,0,(0)	0,0,(0)	SRR530638(1;1),
chrX	98638608	+	canonicalC	TATTA(T*)C	T	98638633	-25	expected	1	1	yes	no	yes	0,1,(0)	0,1,(0)	0,1,(0)	0,1,(0)	SRR530635(1;1),
chrX	148315028	+	canonicalC	TACTA(C*)C	C	148315042	-14	expected	1	1	yes	no	yes	0,1,(0)	0,1,(0)	0,1,(0)	0,1,(0)	SRR530636(1;1),
chr1	36219942	-	canonical2nt	TGCTC(CC*)T	C	36219208	-734	distal	1	1	no	no	yes	0,0,(0,1)	0,0,(0,1)	0,0,(0,0)	0,0,(0,0)	SRR530639(1;1),
chr1	36401044	-	canonical2nt	TGCTG(CA*)T	A	36401024	-20	expected	1	1	yes	no	yes	0,0,(0,1)	0,0,(0,1)	0,0,(0,1)	0,0,(0,1)	SRR530640(1;1),
chr1	36865345	-	canonical2nt	TACTG(A*T)T	A	36865321	-22	expected	1	1	yes	no	yes	0,0,(1,0)	0,0,(1,0)	0,0,(1,0)	0,0,(1,0)	SRR530636(1;1),
chr1	43108855	-	canonical2nt	TACTG(A*G)T	A	43108836	-17	expected	1	1	no	no	yes	1,0,(0,0)	1,0,(0,0)	0,0,(0,0)	0,0,(0,0)	SRR530635(1;1),
chr1	52271128	-	canonical2nt	TGCAA(AG*)T	G	52269210	-1918	distal	1	1	no	no	yes	0,0,(0,1)	0,0,(0,1)	0,0,(0,0)	0,0,(0,0)	SRR530636(1;1),
chr1	55056623	-	canonical2nt	TGATA(TA*)T	A	55056596	-27	expected	1	1	yes	no	yes	0,0,(0,1)	0,0,(0,1)	0,0,(0,1)	0,0,(0,1)	SRR530635(1;1),
chr1	75128087	-	canonical2nt	TCCTC(A*A)T	A	75126225	-1860	distal	2	1	no	no	yes	0,0,(2,0)	0,0,(1,0)	0,0,(0,0)	0,0,(0,0)	SRR530635(2;1),
chr1	75490661	-	canonical2nt	TAGTT(A*G)T	A	75490632	-27	expected	1	1	no	no	yes	0,0,(1,0)	0,0,(1,0)	0,0,(0,0)	0,0,(0,0)	SRR530639(1;1),
chr1	93283943	-	canonical2nt	TTTTG(TA*)T	A	93283918	-25	expected	2	2	yes	no	yes	0,0,(0,2)	0,0,(0,2)	0,0,(0,2)	0,0,(0,2)	SRR530636(2;2),
chr1	94358948	-	canonical2nt	TGCTG(AC*)C	C	94358922	-26	expected	1	1	yes	no	yes	0,0,(0,1)	0,0,(0,1)	0,0,(0,1)	0,0,(0,1)	SRR530637(1;1),
chr1	95305102	-	canonical2nt	GGCTG(A*G)C	A	95305074	-26	expected	1	1	no	no	yes	1,0,(0,0)	1,0,(0,0)	0,0,(0,0)	0,0,(0,0)	SRR530637(1;1),
chr1	95324867	-	canonical2nt	TGGTA(TG*)T	G	95324829	-38	expected	1	1	yes	no	yes	0,1,(0,0)	0,1,(0,0)	0,1,(0,0)	0,1,(0,0)	SRR530634(1;1),
chr1	95521224	-	canonical2nt	TACCC(A*G)T	A	95521201	-21	expected	2	2	yes	no	yes	0,0,(2,0)	0,0,(2,0)	0,0,(2,0)	0,0,(2,0)	SRR530636(2;2),
chr1	95522211	-	canonical2nt	AATTC(A*G)C	A	95522183	-26	expected	1	1	yes	no	yes	0,0,(1,0)	0,0,(1,0)	0,0,(1,0)	0,0,(1,0)	SRR530636(1;1),
chr1	95531984	-	canonical2nt	TGTTG(AC*)C	C	95531960	-24	expected	1	1	yes	no	yes	0,0,(0,1)	0,0,(0,1)	0,0,(0,1)	0,0,(0,1)	SRR530636(1;1),
chr1	108676707	-	canonical2nt	AGCTG(A*G)C	A	108676687	-18	expected	1	1	yes	no	yes	0,0,(1,0)	0,0,(1,0)	0,0,(1,0)	0,0,(1,0)	SRR530636(1;1),
chr1	121622696	-	canonical2nt	TTTTG(AA*)T	A	121622673	-23	expected	1	1	yes	no	yes	0,0,(0,1)	0,0,(0,1)	0,0,(0,1)	0,0,(0,1)	SRR530635(1;1),
chr1	145986834	-	canonical2nt	TGCTT(A*A)C	A	145986813	-19	expected	1	1	yes	no	yes	0,0,(1,0)	0,0,(1,0)	0,0,(1,0)	0,0,(1,0)	SRR530637(1;1),
chr1	164609771	-	canonical2nt	TTCTC(A*G)T	A	164609738	-31	expected	3	3	yes	yes	yes	0,0,(3,0)	0,0,(3,0)	0,0,(3,0)	0,0,(3,0)	SRR530637(1;1),SRR530635(2;2),
chr1	164611055	-	canonical2nt	TATTA(CA*)T	A	164611027	-28	expected	1	1	yes	no	yes	0,0,(0,1)	0,0,(0,1)	0,0,(0,1)	0,0,(0,1)	SRR530634(1;1),
chr1	164612676	-	canonical2nt	TGCTA(CA*)T	A	164612652	-24	expected	6	5	yes	no	yes	0,0,(0,6)	0,0,(0,5)	0,0,(0,2)	0,0,(0,1)	SRR530637(6;5),
chr1	173210153	-	canonical2nt	TTTTC(A*A)C	A	173210132	-19	expected	1	1	no	no	yes	0,0,(1,0)	0,0,(1,0)	0,0,(0,0)	0,0,(0,0)	SRR530635(1;1),
chr1	173210420	-	canonical2nt	TCCTT(A*G)T	A	173210386	-32	expected	3	3	yes	no	yes	0,0,(3,0)	0,0,(3,0)	0,0,(2,0)	0,0,(2,0)	SRR530636(3;3),
chr1	180261001	-	canonical2nt	TGATT(TA*)T	A	180260977	-24	expected	2	2	yes	no	yes	0,0,(0,2)	0,0,(0,2)	0,0,(0,2)	0,0,(0,2)	SRR530635(2;2),
chr1	181699293	-	canonical2nt	AACTG(A*G)T	A	181699270	-21	expected	1	1	yes	no	yes	0,0,(1,0)	0,0,(1,0)	0,0,(1,0)	0,0,(1,0)	SRR530635(1;1),
chr1	4881984	+	canonical2nt	TCCTT(AA*)T	A	4881995	-11	expected	2	2	yes	yes	yes	0,2,(0,0)	0,2,(0,0)	0,1,(0,0)	0,1,(0,0)	SRR530634(1;1),SRR530636(1;1),
chr1	39428125	+	canonical2nt	TGCTG(AC*)T	C	39428146	-21	expected	2	1	yes	no	yes	0,0,(0,2)	0,0,(0,1)	0,0,(0,2)	0,0,(0,1)	SRR530636(2;1),
chr1	52194098	+	canonical2nt	TATTC(C*A)C	C	52194122	-22	expected	1	1	no	no	yes	0,0,(1,0)	0,0,(1,0)	0,0,(0,0)	0,0,(0,0)	SRR530638(1;1),
chr1	58455823	+	canonical2nt	TACTG(CA*)C	A	58455847	-24	expected	3	3	yes	no	yes	0,0,(0,3)	0,0,(0,3)	0,0,(0,3)	0,0,(0,3)	SRR530638(3;3),
chr1	58455837	+	canonical2nt	TGTTA(CG*)T	G	58455847	-10	proximal	1	1	no	no	yes	0,1,(0,0)	0,1,(0,0)	0,0,(0,0)	0,0,(0,0)	SRR530638(1;1),
chr1	58567386	+	canonical2nt	TGCTC(A*G)C	A	58567414	-26	expected	1	1	yes	no	yes	0,0,(1,0)	0,0,(1,0)	0,0,(1,0)	0,0,(1,0)	SRR530638(1;1),
chr1	58711770	+	canonical2nt	TGCTT(TA*)T	A	58711788	-18	expected	2	2	yes	no	yes	0,0,(0,2)	0,0,(0,2)	0,0,(0,2)	0,0,(0,2)	SRR530637(2;2),
chr1	74636037	+	canonical2nt	TTCTA(TA*)C	A	74636059	-22	expected	2	2	no	no	yes	0,2,(0,0)	0,2,(0,0)	0,0,(0,0)	0,0,(0,0)	SRR530635(2;2),
chr1	75526487	+	canonical2nt	TGCTG(TG*)T	G	75526508	-21	expected	1	1	yes	no	yes	0,1,(0,0)	0,1,(0,0)	0,1,(0,0)	0,1,(0,0)	SRR530637(1;1),
chr1	88943593	+	canonical2nt	GGCTT(A*G)T	A	88943611	-16	expected	1	1	no	no	yes	0,0,(1,0)	0,0,(1,0)	0,0,(0,0)	0,0,(0,0)	SRR530640(1;1),
chr1	89250954	+	canonical2nt	TGTTT(GA*)C	A	89250978	-24	expected	2	2	yes	no	yes	0,0,(0,2)	0,0,(0,2)	0,0,(0,2)	0,0,(0,2)	SRR530635(2;2),
chr1	89670705	+	canonical2nt	TGCTC(TT*)T	T	89670719	-14	expected	1	1	no	no	yes	0,1,(0,0)	0,1,(0,0)	0,0,(0,0)	0,0,(0,0)	SRR530638(1;1),
chr1	93416598	+	canonical2nt	TGTTT(CA*)C	A	93416632	-34	expected	1	1	no	no	yes	0,0,(0,1)	0,0,(0,1)	0,0,(0,0)	0,0,(0,0)	SRR530635(1;1),
chr1	93424147	+	canonical2nt	TGCTG(GA*)G	A	93424194	-47	expected	1	1	no	no	yes	0,0,(0,1)	0,0,(0,1)	0,0,(0,0)	0,0,(0,0)	SRR530633(1;1),
chr1	94812374	+	canonical2nt	TCCTT(A*G)C	A	94812390	-14	expected	1	1	yes	no	yes	0,0,(1,0)	0,0,(1,0)	0,0,(1,0)	0,0,(1,0)	SRR530636(1;1),
chr1	95398061	+	canonical2nt	TTCTC(TA*)C	A	95398083	-22	expected	1	1	yes	no	yes	0,0,(0,1)	0,0,(0,1)	0,0,(0,1)	0,0,(0,1)	SRR530637(1;1),
chr1	120448565	+	canonical2nt	TGCTT(AA*)C	A	120448589	-24	expected	2	2	no	no	yes	0,2,(0,0)	0,2,(0,0)	0,0,(0,0)	0,0,(0,0)	SRR530634(2;2),
chr1	129827255	+	canonical2nt	AGTTC(AA*)C	A	129827283	-28	expected	1	1	yes	no	yes	0,0,(0,1)	0,0,(0,1)	0,0,(0,1)	0,0,(0,1)	SRR530636(1;1),
chr1	129834538	+	canonical2nt	TGCAG(TA*)T	A	129834565	-27	expected	1	1	yes	no	yes	0,0,(0,1)	0,0,(0,1)	0,0,(0,1)	0,0,(0,1)	SRR530637(1;1),
chr1	129834546	+	canonical2nt	TTCTG(GG*)T	G	129834565	-19	expected	1	1	no	no	yes	0,1,(0,0)	0,1,(0,0)	0,0,(0,0)	0,0,(0,0)	SRR530637(1;1),
chr1	130148759	+	canonical2nt	TCTTA(AA*)T	A	130148779	-20	expected	2	2	yes	no	yes	0,2,(0,0)	0,2,(0,0)	0,2,(0,0)	0,2,(0,0)	SRR530637(2;2),
chr1	136518483	+	canonical2nt	TGTTT(CA*)C	A	136518511	-28	expected	2	2	yes	no	yes	0,0,(0,2)	0,0,(0,2)	0,0,(0,2)	0,0,(0,2)	SRR530633(2;2),
chr1	162965863	+	canonical2nt	TACTA(A*A)G	A	162965882	-17	expected	3	3	yes	yes	yes	0,2,(1,0)	0,2,(1,0)	0,2,(1,0)	0,2,(1,0)	SRR530637(2;2),SRR530638(1;1),
chr1	174051260	+	canonical2nt	TCTTA(AA*)T	A	174051360	-100	distal	1	1	yes	no	yes	0,1,(0,0)	0,1,(0,0)	0,1,(0,0)	0,1,(0,0)	SRR530633(1;1),
chr1	176123026	+	canonical2nt	TGCTG(A*G)G	A	176123050	-22	expected	3	3	yes	no	yes	0,0,(3,0)	0,0,(3,0)	0,0,(3,0)	0,0,(3,0)	SRR530636(3;3),
chr1	182522961	+	canonical2nt	TGCAG(AA*)T	A	182522978	-17	expected	1	1	yes	no	yes	0,0,(0,1)	0,0,(0,1)	0,0,(0,1)	0,0,(0,1)	SRR530637(1;1),
chr1	182836270	+	canonical2nt	CACTC(A*G)T	A	182836293	-21	expected	1	1	yes	no	yes	0,0,(1,0)	0,0,(1,0)	0,0,(1,0)	0,0,(1,0)	SRR530637(1;1),
chr1	187107235	+	canonical2nt	TGCTG(A*A)T	A	187107260	-23	expected	1	1	no	no	yes	0,0,(1,0)	0,0,(1,0)	0,0,(0,0)	0,0,(0,0)	SRR530638(1;1),
chr1	187235010	+	canonical2nt	GGTTC(A*G)T	A	187235036	-24	expected	1	1	yes	no	yes	0,0,(1,0)	0,0,(1,0)	0,0,(1,0)	0,0,(1,0)	SRR530634(1;1),
chr1	187280204	+	canonical2nt	TACAC(A*A)C	A	187280230	-24	expected	1	1	yes	no	yes	0,0,(1,0)	0,0,(1,0)	0,0,(1,0)	0,0,(1,0)	SRR530636(1;1),
chr1	189057605	+	canonical2nt	TTCTC(A*G)T	A	189057625	-18	expected	2	2	yes	no	yes	0,0,(2,0)	0,0,(2,0)	0,0,(2,0)	0,0,(2,0)	SRR530634(2;2),
chr1	193437222	+	canonical2nt	TGGTG(T*G)T	T	193437517	-293	distal	1	1	no	no	yes	0,0,(1,0)	0,0,(1,0)	0,0,(0,0)	0,0,(0,0)	SRR530636(1;1),
chr10	39963724	-	canonical2nt	TGTTG(A*G)A	A	39963699	-23	expected	1	1	yes	no	yes	0,0,(1,0)	0,0,(1,0)	0,0,(1,0)	0,0,(1,0)	SRR530637(1;1),
chr10	59413804	-	canonical2nt	TACAA(TA*)C	A	59413777	-27	expected	1	1	yes	no	yes	0,1,(0,0)	0,1,(0,0)	0,1,(0,0)	0,1,(0,0)	SRR530640(1;1),
chr10	61737375	-	canonical2nt	TGCTC(A*G)T	A	61737350	-23	expected	1	1	no	no	yes	1,0,(0,0)	1,0,(0,0)	0,0,(0,0)	0,0,(0,0)	SRR530634(1;1),
chr10	75208169	-	canonical2nt	TGTGC(A*A)T	A	75208142	-25	expected	1	1	yes	no	yes	0,0,(1,0)	0,0,(1,0)	0,0,(1,0)	0,0,(1,0)	SRR530636(1;1),
chr10	75210746	-	canonical2nt	TACTG(A*A)C	A	75210720	-24	expected	1	1	no	no	yes	1,0,(0,0)	1,0,(0,0)	0,0,(0,0)	0,0,(0,0)	SRR530637(1;1),
chr10	75885992	-	canonical2nt	TCTTA(A*A)T	A	75885970	-20	expected	1	1	no	no	yes	1,0,(0,0)	1,0,(0,0)	0,0,(0,0)	0,0,(0,0)	SRR530638(1;1),
chr10	76541285	-	canonical2nt	TGCCT(A*G)C	A	76541264	-19	expected	1	1	yes	no	yes	0,0,(1,0)	0,0,(1,0)	0,0,(1,0)	0,0,(1,0)	SRR530640(1;1),
chr10	79857961	-	canonical2nt	TGCAG(A*G)T	A	79857946	-13	expected	2	2	yes	no	yes	2,0,(0,0)	2,0,(0,0)	2,0,(0,0)	2,0,(0,0)	SRR530636(2;2),
chr10	79879164	-	canonical2nt	TGCTG(GG*)G	G	79878671	-493	distal	1	1	no	no	yes	0,0,(0,1)	0,0,(0,1)	0,0,(0,0)	0,0,(0,0)	SRR530639(1;1),
chr10	80132476	-	canonical2nt	GACTC(A*G)T	A	80132448	-26	expected	1	1	no	no	yes	0,0,(1,0)	0,0,(1,0)	0,0,(0,0)	0,0,(0,0)	SRR530635(1;1),
chr10	80512658	-	canonical2nt	TCCTC(T*G)C	T	80512626	-30	expected	1	1	no	no	yes	0,0,(1,0)	0,0,(1,0)	0,0,(0,0)	0,0,(0,0)	SRR530634(1;1),
chr10	86166376	-	canonical2nt	AGCTG(A*G)T	A	86166346	-28	expected	1	1	yes	no	yes	0,0,(1,0)	0,0,(1,0)	0,0,(1,0)	0,0,(1,0)	SRR530637(1;1),
chr10	114636852	-	canonical2nt	TTCTC(AG*)T	G	114636820	-32	expected	1	1	yes	no	yes	0,1,(0,0)	0,1,(0,0)	0,1,(0,0)	0,1,(0,0)	SRR530635(1;1),
chr10	126737663	-	canonical2nt	TCCTC(T*G)T	T	126737636	-25	expected	1	1	no	no	yes	1,0,(0,0)	1,0,(0,0)	0,0,(0,0)	0,0,(0,0)	SRR530638(1;1),
chr10	21716339	+	canonical2nt	CACTA(A*G)C	A	21716364	-23	expected	1	1	yes	no	yes	0,0,(1,0)	0,0,(1,0)	0,0,(1,0)	0,0,(1,0)	SRR530639(1;1),
chr10	59302399	+	canonical2nt	TGCTT(TA*)T	A	59302422	-23	expected	1	1	yes	no	yes	0,0,(0,1)	0,0,(0,1)	0,0,(0,1)	0,0,(0,1)	SRR530636(1;1),
chr10	79439114	+	canonical2nt	CGCTG(TG*)T	G	79439138	-24	expected	2	1	yes	no	yes	0,2,(0,0)	0,1,(0,0)	0,2,(0,0)	0,1,(0,0)	SRR530636(2;1),
chr10	79517684	+	canonical2nt	TAGTG(TA*)T	A	79517712	-28	expected	2	2	yes	no	yes	0,0,(0,2)	0,0,(0,2)	0,0,(0,2)	0,0,(0,2)	SRR530640(2;2),
chr10	79587527	+	canonical2nt	AGCTA(A*G)C	A	79587546	-17	expected	1	1	yes	no	yes	0,0,(1,0)	0,0,(1,0)	0,0,(1,0)	0,0,(1,0)	SRR530636(1;1),
chr10	79588214	+	canonical2nt	TCCTT(A*G)C	A	79588223	-7	proximal	11	7	yes	yes	yes	3,0,(8,0)	3,0,(4,0)	1,0,(1,0)	1,0,(1,0)	SRR530634(1;1),SRR530636(6;4),SRR530640(1;1),SRR530637(3;1),
chr10	80248218	+	canonical2nt	TACTG(A*G)A	A	80248242	-22	expected	1	1	yes	no	yes	0,0,(1,0)	0,0,(1,0)	0,0,(1,0)	0,0,(1,0)	SRR530638(1;1),
chr10	80541192	+	canonical2nt	GGCTG(A*G)C	A	80541214	-20	expected	2	2	yes	no	yes	0,0,(2,0)	0,0,(2,0)	0,0,(2,0)	0,0,(2,0)	SRR530636(2;2),
chr10	80610697	+	canonical2nt	TGCTG(AC*)C	C	80610714	-17	expected	1	1	yes	no	yes	0,0,(0,1)	0,0,(0,1)	0,0,(0,1)	0,0,(0,1)	SRR530636(1;1),
chr10	80643295	+	canonical2nt	TGCTG(AC*)C	C	80643309	-14	expected	1	1	yes	no	yes	0,0,(0,1)	0,0,(0,1)	0,0,(0,1)	0,0,(0,1)	SRR530633(1;1),
chr10	93630353	+	canonical2nt	TACTG(A*G)A	A	93630382	-27	expected	1	1	no	no	yes	1,0,(0,0)	1,0,(0,0)	0,0,(0,0)	0,0,(0,0)	SRR530633(1;1),
chr10	96080879	+	canonical2nt	TCCTG(A*G)C	A	96080909	-28	expected	1	1	yes	no	yes	0,0,(1,0)	0,0,(1,0)	0,0,(1,0)	0,0,(1,0)	SRR530634(1;1),
chr10	126430042	+	canonical2nt	AGCTC(A*G)C	A	126430063	-19	expected	1	1	yes	no	yes	0,0,(1,0)	0,0,(1,0)	0,0,(1,0)	0,0,(1,0)	SRR530636(1;1),
chr10	126712028	+	canonical2nt	CATTC(A*G)T	A	126712049	-19	expected	1	1	no	no	yes	0,0,(1,0)	0,0,(1,0)	0,0,(0,0)	0,0,(0,0)	SRR530636(1;1),
chr10	126732738	+	canonical2nt	TCCTG(A*A)C	A	126732778	-38	expected	1	1	no	no	yes	1,0,(0,0)	1,0,(0,0)	0,0,(0,0)	0,0,(0,0)	SRR530635(1;1),
chr10	126895842	+	canonical2nt	TACTT(T*T)C	T	126895865	-21	expected	2	2	yes	yes	yes	0,0,(2,0)	0,0,(2,0)	0,0,(1,0)	0,0,(1,0)	SRR530639(1;1),SRR530636(1;1),
chr11	3032909	-	canonical2nt	TACCA(A*A)C	A	3032330	-577	distal	1	1	no	no	yes	0,0,(1,0)	0,0,(1,0)	0,0,(0,0)	0,0,(0,0)	SRR530634(1;1),
chr11	3077551	-	canonical2nt	TACTG(TA*)A	A	3077524	-27	expected	1	1	yes	no	yes	0,0,(0,1)	0,0,(0,1)	0,0,(0,1)	0,0,(0,1)	SRR530638(1;1),
chr11	3422663	-	canonical2nt	GGTTG(AA*)T	A	3422581	-82	distal	1	1	no	no	yes	0,0,(0,1)	0,0,(0,1)	0,0,(0,0)	0,0,(0,0)	SRR530635(1;1),
chr11	4993760	-	canonical2nt	TAGTC(AA*)T	A	4993735	-25	expected	3	3	yes	yes	yes	0,0,(1,2)	0,0,(1,2)	0,0,(0,2)	0,0,(0,2)	SRR530637(2;2),SRR530636(1;1),
chr11	8910423	-	canonical2nt	TGTTC(TG*)C	G	8910420	-3	proximal	2	2	yes	no	yes	0,2,(0,0)	0,2,(0,0)	0,2,(0,0)	0,2,(0,0)	SRR530635(2;2),
chr11	33054084	-	canonical2nt	TCCTT(AA*)T	A	33054060	-24	expected	2	2	yes	no	yes	0,0,(0,2)	0,0,(0,2)	0,0,(0,2)	0,0,(0,2)	SRR530637(2;2),
chr11	33061658	-	canonical2nt	TGCTA(G*G)T	G	33061627	-29	expected	1	1	no	no	yes	1,0,(0,0)	1,0,(0,0)	0,0,(0,0)	0,0,(0,0)	SRR530635(1;1),
chr11	50110661	-	canonical2nt	TGTTC(A*G)T	A	50110639	-20	expected	1	1	yes	no	yes	0,0,(1,0)	0,0,(1,0)	0,0,(1,0)	0,0,(1,0)	SRR530635(1;1),
chr11	53097189	-	canonical2nt	TGTTG(A*A)C	A	53097164	-23	expected	1	1	yes	no	yes	0,0,(1,0)	0,0,(1,0)	0,0,(1,0)	0,0,(1,0)	SRR530635(1;1),
chr11	53799848	-	canonical2nt	TACTG(AG*)G	G	53797187	-2661	distal	1	1	no	no	yes	0,0,(0,1)	0,0,(0,1)	0,0,(0,0)	0,0,(0,0)	SRR530636(1;1),
chr11	54751588	-	canonical2nt	TCTTT(A*G)C	A	54751567	-19	expected	1	1	yes	no	yes	0,0,(1,0)	0,0,(1,0)	0,0,(1,0)	0,0,(1,0)	SRR530635(1;1),
chr11	59608785	-	canonical2nt	TTCTG(A*G)C	A	59608766	-17	expected	1	1	yes	no	yes	0,0,(1,0)	0,0,(1,0)	0,0,(1,0)	0,0,(1,0)	SRR530637(1;1),
chr11	60603784	-	canonical2nt	TACTC(CA*)T	A	60603764	-20	expected	9	9	yes	yes	yes	0,4,(1,4)	0,4,(1,4)	0,1,(0,4)	0,1,(0,4)	SRR530638(3;3),SRR530633(2;2),SRR530637(4;4),
chr11	62152601	-	canonical2nt	CACTC(A*G)T	A	62152570	-29	expected	1	1	no	no	yes	0,0,(1,0)	0,0,(1,0)	0,0,(0,0)	0,0,(0,0)	SRR530640(1;1),
chr11	69168005	-	canonical2nt	TTCTG(GA*)C	A	69167984	-21	expected	1	1	yes	no	yes	0,0,(0,1)	0,0,(0,1)	0,0,(0,1)	0,0,(0,1)	SRR530637(1;1),
chr11	69221361	-	canonical2nt	TACCT(AA*)C	A	69221341	-20	expected	2	2	yes	yes	yes	0,1,(0,1)	0,1,(0,1)	0,0,(0,1)	0,0,(0,1)	SRR530636(1;1),SRR530635(1;1),
chr11	69472221	-	canonical2nt	TCCTC(A*G)C	A	69472200	-19	expected	3	3	yes	yes	yes	0,0,(3,0)	0,0,(3,0)	0,0,(1,0)	0,0,(1,0)	SRR530635(2;2),SRR530634(1;1),
chr11	69558571	-	canonical2nt	CACTG(A*A)C	A	69558546	-23	expected	1	1	yes	no	yes	0,0,(1,0)	0,0,(1,0)	0,0,(1,0)	0,0,(1,0)	SRR530634(1;1),
chr11	70466503	-	canonical2nt	AACTT(A*A)T	A	70466481	-20	expected	1	1	yes	no	yes	0,0,(1,0)	0,0,(1,0)	0,0,(1,0)	0,0,(1,0)	SRR530635(1;1),
chr11	70792305	-	canonical2nt	TGCTG(AC*)T	C	70792286	-19	expected	1	1	yes	no	yes	0,0,(0,1)	0,0,(0,1)	0,0,(0,1)	0,0,(0,1)	SRR530633(1;1),
chr11	75229034	-	canonical2nt	TATAG(A*G)T	A	75228626	-406	distal	1	1	no	no	yes	0,0,(1,0)	0,0,(1,0)	0,0,(0,0)	0,0,(0,0)	SRR530638(1;1),
chr11	78786713	-	canonical2nt	TGCTC(T*T)T	T	78786691	-20	expected	3	3	yes	yes	yes	2,1,(0,0)	2,1,(0,0)	0,1,(0,0)	0,1,(0,0)	SRR530636(2;2),SRR530634(1;1),
chr11	84635280	-	canonical2nt	GGCTG(A*G)C	A	84635259	-19	expected	2	2	yes	yes	yes	1,0,(1,0)	1,0,(1,0)	0,0,(1,0)	0,0,(1,0)	SRR530636(2;2),
chr11	86531589	-	canonical2nt	TCCTT(A*A)T	A	86531563	-24	expected	1	1	yes	no	yes	0,0,(1,0)	0,0,(1,0)	0,0,(1,0)	0,0,(1,0)	SRR530636(1;1),
chr11	94530142	-	canonical2nt	TGCTG(GA*)C	A	94530121	-21	expected	1	1	yes	no	yes	0,0,(0,1)	0,0,(0,1)	0,0,(0,1)	0,0,(0,1)	SRR530638(1;1),
chr11	96772070	-	canonical2nt	TGCTG(A*G)T	A	96772052	-16	expected	1	1	no	no	yes	1,0,(0,0)	1,0,(0,0)	0,0,(0,0)	0,0,(0,0)	SRR530634(1;1),
chr11	97026437	-	canonical2nt	TTCTA(A*G)T	A	97026410	-25	expected	1	1	yes	no	yes	0,0,(1,0)	0,0,(1,0)	0,0,(1,0)	0,0,(1,0)	SRR530636(1;1),
chr11	98857061	-	canonical2nt	TTCTC(A*G)T	A	98857038	-21	expected	7	5	yes	yes	yes	0,0,(7,0)	0,0,(5,0)	0,0,(7,0)	0,0,(5,0)	SRR530636(6;4),SRR530635(1;1),
chr11	99074671	-	canonical2nt	TGCTG(A*G)C	A	99074644	-25	expected	1	1	yes	no	yes	0,0,(1,0)	0,0,(1,0)	0,0,(1,0)	0,0,(1,0)	SRR530640(1;1),
chr11	100452899	-	canonical2nt	AGCTG(A*A)C	A	100452879	-18	expected	5	5	yes	yes	yes	3,0,(2,0)	3,0,(2,0)	0,0,(2,0)	0,0,(2,0)	SRR530635(1;1),SRR530638(3;3),SRR530637(1;1),
chr11	102326878	-	canonical2nt	TGGTG(T*G)T	T	102326864	-12	expected	1	1	no	no	yes	0,0,(1,0)	0,0,(1,0)	0,0,(0,0)	0,0,(0,0)	SRR530636(1;1),
chr11	102550183	-	canonical2nt	TCCTT(AA*)C	A	102550173	-10	proximal	1	1	no	no	yes	0,1,(0,0)	0,1,(0,0)	0,0,(0,0)	0,0,(0,0)	SRR530637(1;1),
chr11	102701454	-	canonical2nt	AGCTT(A*G)C	A	102701432	-20	expected	1	1	yes	no	yes	0,0,(1,0)	0,0,(1,0)	0,0,(1,0)	0,0,(1,0)	SRR530638(1;1),
chr11	102701723	-	canonical2nt	TGCTC(C*A)C	C	102701696	-25	expected	1	1	no	no	yes	0,0,(1,0)	0,0,(1,0)	0,0,(0,0)	0,0,(0,0)	SRR530634(1;1),
chr11	102774884	-	canonical2nt	GACTG(A*G)C	A	102774864	-18	expected	1	1	yes	no	yes	0,0,(1,0)	0,0,(1,0)	0,0,(1,0)	0,0,(1,0)	SRR530636(1;1),
chr11	102940993	-	canonical2nt	TCCTG(A*G)C	A	102940983	-8	proximal	2	2	no	no	yes	0,0,(2,0)	0,0,(2,0)	0,0,(0,0)	0,0,(0,0)	SRR530639(2;2),
chr11	106074694	-	canonical2nt	CACTT(AG*)C	G	106074675	-19	expected	1	1	no	no	yes	0,1,(0,0)	0,1,(0,0)	0,0,(0,0)	0,0,(0,0)	SRR530636(1;1),
chr11	106112671	-	canonical2nt	TGCTG(CC*)T	C	106112649	-22	expected	1	1	yes	no	yes	0,0,(0,1)	0,0,(0,1)	0,0,(0,1)	0,0,(0,1)	SRR530634(1;1),
chr11	106116762	-	canonical2nt	TGCCT(TA*)T	A	106116739	-23	expected	1	1	yes	no	yes	0,0,(0,1)	0,0,(0,1)	0,0,(0,1)	0,0,(0,1)	SRR530634(1;1),
chr11	107041453	-	canonical2nt	TTCTG(AA*)C	A	107041432	-21	expected	1	1	yes	no	yes	0,0,(0,1)	0,0,(0,1)	0,0,(0,1)	0,0,(0,1)	SRR530637(1;1),
chr11	116332902	-	canonical2nt	TGCAT(A*A)C	A	116332869	-31	expected	1	1	yes	no	yes	1,0,(0,0)	1,0,(0,0)	1,0,(0,0)	1,0,(0,0)	SRR530635(1;1),
chr11	119957214	-	canonical2nt	GGCTC(A*G)C	A	119957185	-27	expected	1	1	yes	no	yes	0,0,(1,0)	0,0,(1,0)	0,0,(1,0)	0,0,(1,0)	SRR530637(1;1),
chr11	119971247	-	canonical2nt	TGTGG(AG*)T	G	119970850	-397	distal	1	1	no	no	yes	0,0,(0,1)	0,0,(0,1)	0,0,(0,0)	0,0,(0,0)	SRR530637(1;1),
chr11	120472745	-	canonical2nt	TGCTT(CA*)C	A	120472727	-18	expected	3	3	yes	no	yes	0,0,(0,3)	0,0,(0,3)	0,0,(0,2)	0,0,(0,2)	SRR530636(3;3),
chr11	120473039	-	canonical2nt	AGCTG(A*G)C	A	120473019	-18	expected	3	3	yes	yes	yes	2,0,(1,0)	2,0,(1,0)	2,0,(1,0)	2,0,(1,0)	SRR530634(1;1),SRR530636(2;2),
chr11	120652366	-	canonical2nt	TCCTG(TG*)C	G	120651194	-1172	distal	1	1	no	no	yes	0,0,(0,1)	0,0,(0,1)	0,0,(0,0)	0,0,(0,0)	SRR530634(1;1),
chr11	120654445	-	canonical2nt	GGTTG(AA*)C	A	120654424	-21	expected	1	1	yes	no	yes	0,0,(0,1)	0,0,(0,1)	0,0,(0,1)	0,0,(0,1)	SRR530637(1;1),
chr11	120669656	-	canonical2nt	TGCTC(A*G)A	A	120669640	-14	expected	1	1	yes	no	yes	0,0,(1,0)	0,0,(1,0)	0,0,(1,0)	0,0,(1,0)	SRR530636(1;1),
chr11	120676801	-	canonical2nt	TGCTG(AC*)C	C	120676784	-17	expected	3	3	yes	yes	yes	0,0,(0,3)	0,0,(0,3)	0,0,(0,3)	0,0,(0,3)	SRR530638(1;1),SRR530637(1;1),SRR530635(1;1),
chr11	120677295	-	canonical2nt	TGCTG(AC*)C	C	120677276	-19	expected	2	1	yes	no	yes	0,0,(0,2)	0,0,(0,1)	0,0,(0,2)	0,0,(0,1)	SRR530638(2;1),
chr11	3143832	+	canonical2nt	TGCTG(CA*)C	A	3143853	-21	expected	2	1	yes	no	yes	0,0,(0,2)	0,0,(0,1)	0,0,(0,2)	0,0,(0,1)	SRR530636(2;1),
chr11	4076241	+	canonical2nt	TGCTT(A*G)T	A	4076272	-29	expected	1	1	yes	no	yes	0,0,(1,0)	0,0,(1,0)	0,0,(1,0)	0,0,(1,0)	SRR530637(1;1),
chr11	23182502	+	canonical2nt	TACTT(AA*)A	A	23182528	-26	expected	1	1	yes	no	yes	0,0,(0,1)	0,0,(0,1)	0,0,(0,1)	0,0,(0,1)	SRR530635(1;1),
chr11	51087034	+	canonical2nt	TACTT(A*G)A	A	51087061	-25	expected	1	1	no	no	yes	0,0,(1,0)	0,0,(1,0)	0,0,(0,0)	0,0,(0,0)	SRR530638(1;1),
chr11	53408306	+	canonical2nt	TCCTT(TA*)C	A	53408327	-21	expected	1	1	yes	no	yes	0,0,(0,1)	0,0,(0,1)	0,0,(0,1)	0,0,(0,1)	SRR530638(1;1),
chr11	55307185	+	canonical2nt	AGCTA(A*G)T	A	55308754	-1567	distal	1	1	yes	no	yes	1,0,(0,0)	1,0,(0,0)	1,0,(0,0)	1,0,(0,0)	SRR530633(1;1),
chr11	59578885	+	canonical2nt	TGCTG(A*A)G	A	59578909	-22	expected	3	3	no	no	yes	3,0,(0,0)	3,0,(0,0)	0,0,(0,0)	0,0,(0,0)	SRR530634(3;3),
chr11	62097607	+	canonical2nt	AACTG(A*A)C	A	62097632	-23	expected	1	1	no	no	yes	1,0,(0,0)	1,0,(0,0)	0,0,(0,0)	0,0,(0,0)	SRR530634(1;1),
chr11	62417279	+	canonical2nt	TGCAC(AG*)C	G	62417904	-625	distal	1	1	no	no	yes	0,0,(0,1)	0,0,(0,1)	0,0,(0,0)	0,0,(0,0)	SRR530638(1;1),
chr11	68716658	+	canonical2nt	TGCTC(AG*)T	G	68716680	-22	expected	1	1	yes	no	yes	0,1,(0,0)	0,1,(0,0)	0,1,(0,0)	0,1,(0,0)	SRR530634(1;1),
chr11	68917324	+	canonical2nt	TGCCC(A*G)T	A	68917343	-17	expected	1	1	yes	no	yes	1,0,(0,0)	1,0,(0,0)	1,0,(0,0)	1,0,(0,0)	SRR530634(1;1),
chr11	69723743	+	canonical2nt	TGTAG(A*A)T	A	69723762	-17	expected	1	1	yes	no	yes	1,0,(0,0)	1,0,(0,0)	1,0,(0,0)	1,0,(0,0)	SRR530636(1;1),
chr11	69819144	+	canonical2nt	TCCTG(A*G)T	A	69819163	-17	expected	1	1	no	no	yes	1,0,(0,0)	1,0,(0,0)	0,0,(0,0)	0,0,(0,0)	SRR530634(1;1),
chr11	72255877	+	canonical2nt	TCCTG(A*G)C	A	72255901	-22	expected	4	4	yes	yes	yes	0,1,(3,0)	0,1,(3,0)	0,1,(3,0)	0,1,(3,0)	SRR530637(3;3),SRR530635(1;1),
chr11	72256220	+	canonical2nt	TGCTC(T*T)C	T	72256247	-25	expected	1	1	no	no	yes	0,0,(1,0)	0,0,(1,0)	0,0,(0,0)	0,0,(0,0)	SRR530636(1;1),
chr11	72786219	+	canonical2nt	TACAT(AG*)C	G	72786323	-104	distal	1	1	no	no	yes	0,0,(0,1)	0,0,(0,1)	0,0,(0,0)	0,0,(0,0)	SRR530638(1;1),
chr11	72826357	+	canonical2nt	TGCTC(A*G)G	A	72826409	-50	expected	1	1	yes	no	yes	0,0,(1,0)	0,0,(1,0)	0,0,(1,0)	0,0,(1,0)	SRR530634(1;1),
chr11	74473827	+	canonical2nt	TGTTC(CA*)C	A	74473853	-26	expected	1	1	yes	no	yes	0,0,(0,1)	0,0,(0,1)	0,0,(0,1)	0,0,(0,1)	SRR530634(1;1),
chr11	74476857	+	canonical2nt	TGCTT(CA*)T	A	74476881	-24	expected	1	1	no	no	yes	0,0,(0,1)	0,0,(0,1)	0,0,(0,0)	0,0,(0,0)	SRR530634(1;1),
chr11	75307293	+	canonical2nt	TACTC(T*T)T	T	75307315	-20	expected	2	2	no	yes	yes	1,1,(0,0)	1,1,(0,0)	0,0,(0,0)	0,0,(0,0)	SRR530636(2;2),
chr11	75570504	+	canonical2nt	TTCTT(AA*)T	A	75572793	-2289	distal	3	3	yes	yes	yes	0,0,(2,1)	0,0,(2,1)	0,0,(1,0)	0,0,(1,0)	SRR530636(2;2),SRR530635(1;1),
chr11	76021391	+	canonical2nt	TGCCT(TA*)T	A	76021411	-20	expected	3	3	yes	no	yes	0,0,(0,3)	0,0,(0,3)	0,0,(0,3)	0,0,(0,3)	SRR530636(3;3),
chr11	78078245	+	canonical2nt	TACCC(AA*)C	A	78078680	-435	distal	1	1	no	no	yes	0,1,(0,0)	0,1,(0,0)	0,0,(0,0)	0,0,(0,0)	SRR530636(1;1),
chr11	78134522	+	canonical2nt	TCCTC(A*G)T	A	78134544	-20	expected	5	4	yes	yes	yes	0,0,(5,0)	0,0,(4,0)	0,0,(3,0)	0,0,(2,0)	SRR530636(1;1),SRR530635(2;1),SRR530637(1;1),SRR530640(1;1),
chr11	80209267	+	canonical2nt	TACTG(TA*)T	A	80209293	-26	expected	1	1	yes	no	yes	0,0,(0,1)	0,0,(0,1)	0,0,(0,1)	0,0,(0,1)	SRR530636(1;1),
chr11	82611048	+	canonical2nt	TTCTT(AA*)T	A	82611275	-227	distal	1	1	no	no	yes	0,0,(0,1)	0,0,(0,1)	0,0,(0,0)	0,0,(0,0)	SRR530639(1;1),
chr11	83837752	+	canonical2nt	TGTTG(A*A)C	A	83837779	-25	expected	1	1	yes	no	yes	0,0,(1,0)	0,0,(1,0)	0,0,(1,0)	0,0,(1,0)	SRR530639(1;1),
chr11	84092340	+	canonical2nt	TACTG(A*G)A	A	84092367	-25	expected	1	1	no	no	yes	1,0,(0,0)	1,0,(0,0)	0,0,(0,0)	0,0,(0,0)	SRR530634(1;1),
chr11	86943182	+	canonical2nt	TCTTC(A*G)T	A	86943217	-33	expected	1	1	yes	no	yes	0,0,(1,0)	0,0,(1,0)	0,0,(1,0)	0,0,(1,0)	SRR530636(1;1),
chr11	95248497	+	canonical2nt	TGCTC(A*G)A	A	95248524	-25	expected	1	1	no	no	yes	0,0,(1,0)	0,0,(1,0)	0,0,(0,0)	0,0,(0,0)	SRR530637(1;1),
chr11	95615195	+	canonical2nt	TGCTT(GG*)C	G	95615224	-29	expected	1	1	yes	no	yes	0,0,(0,1)	0,0,(0,1)	0,0,(0,1)	0,0,(0,1)	SRR530635(1;1),
chr11	97565077	+	canonical2nt	AACTG(A*G)C	A	97565101	-22	expected	2	2	yes	yes	yes	1,0,(1,0)	1,0,(1,0)	0,0,(1,0)	0,0,(1,0)	SRR530636(2;2),
chr11	98218110	+	canonical2nt	CACTC(A*G)C	A	98218138	-26	expected	1	1	yes	no	yes	0,0,(1,0)	0,0,(1,0)	0,0,(1,0)	0,0,(1,0)	SRR530636(1;1),
chr11	98689852	+	canonical2nt	TAGTC(A*G)C	A	98689868	-14	expected	3	3	yes	yes	yes	0,1,(2,0)	0,1,(2,0)	0,1,(0,0)	0,1,(0,0)	SRR530635(1;1),SRR530636(1;1),SRR530634(1;1),
chr11	100182504	+	canonical2nt	TGGTC(AA*)T	A	100182630	-126	distal	1	1	yes	no	yes	0,1,(0,0)	0,1,(0,0)	0,1,(0,0)	0,1,(0,0)	SRR530636(1;1),
chr11	101190484	+	canonical2nt	TTCTT(AG*)C	G	101190510	-26	expected	1	1	no	no	yes	0,1,(0,0)	0,1,(0,0)	0,0,(0,0)	0,0,(0,0)	SRR530636(1;1),
chr11	102965725	+	canonical2nt	TGCTC(CA*)T	A	102965746	-21	expected	2	2	no	no	yes	0,2,(0,0)	0,2,(0,0)	0,0,(0,0)	0,0,(0,0)	SRR530636(2;2),
chr11	106650754	+	canonical2nt	GGCTG(AA*)T	A	106652044	-1290	distal	1	1	no	no	yes	0,1,(0,0)	0,1,(0,0)	0,0,(0,0)	0,0,(0,0)	SRR530637(1;1),
chr11	107465354	+	canonical2nt	TACTC(A*A)T	A	107465379	-23	expected	2	2	yes	no	yes	0,0,(2,0)	0,0,(2,0)	0,0,(2,0)	0,0,(2,0)	SRR530635(2;2),
chr11	109527932	+	canonical2nt	TGTTT(A*G)C	A	109527957	-23	expected	4	4	yes	yes	yes	0,0,(4,0)	0,0,(4,0)	0,0,(4,0)	0,0,(4,0)	SRR530637(1;1),SRR530633(2;2),SRR530635(1;1),
chr11	115429654	+	canonical2nt	TCTTG(TA*)T	A	115429676	-22	expected	1	1	yes	no	yes	0,0,(0,1)	0,0,(0,1)	0,0,(0,1)	0,0,(0,1)	SRR530634(1;1),
chr11	115431281	+	canonical2nt	AGCTG(A*G)C	A	115431312	-29	expected	1	1	no	no	yes	1,0,(0,0)	1,0,(0,0)	0,0,(0,0)	0,0,(0,0)	SRR530635(1;1),
chr11	115442538	+	canonical2nt	TGCTG(GG*)G	G	115443055	-517	distal	1	1	no	no	yes	0,0,(0,1)	0,0,(0,1)	0,0,(0,0)	0,0,(0,0)	SRR530634(1;1),
chr11	115708883	+	canonical2nt	TGCTC(A*A)G	A	115708902	-17	expected	2	1	yes	no	yes	0,0,(2,0)	0,0,(1,0)	0,0,(2,0)	0,0,(1,0)	SRR530636(2;1),
chr11	115914311	+	canonical2nt	TGCTG(AC*)C	C	115914329	-18	expected	1	1	yes	no	yes	0,0,(0,1)	0,0,(0,1)	0,0,(0,1)	0,0,(0,1)	SRR530636(1;1),
chr11	120340380	+	canonical2nt	CGCTC(A*G)C	A	120340400	-18	expected	2	2	yes	no	yes	0,0,(2,0)	0,0,(2,0)	0,0,(1,0)	0,0,(1,0)	SRR530636(2;2),
chr11	120579298	+	canonical2nt	TGCCA(A*G)C	A	120579350	-50	expected	1	1	no	no	yes	0,0,(1,0)	0,0,(1,0)	0,0,(0,0)	0,0,(0,0)	SRR530634(1;1),
chr11	120815460	+	canonical2nt	TTCTA(TA*)C	A	120815487	-27	expected	2	2	yes	yes	yes	0,0,(0,2)	0,0,(0,2)	0,0,(0,2)	0,0,(0,2)	SRR530636(1;1),SRR530638(1;1),
chr12	36834254	-	canonical2nt	TGCTC(T*T)T	T	36834229	-23	expected	3	3	yes	yes	yes	0,2,(1,0)	0,2,(1,0)	0,1,(0,0)	0,1,(0,0)	SRR530638(1;1),SRR530640(1;1),SRR530635(1;1),
chr12	40943848	-	canonical2nt	TACAG(T*G)T	T	40943829	-17	expected	2	2	yes	yes	yes	2,0,(0,0)	2,0,(0,0)	2,0,(0,0)	2,0,(0,0)	SRR530637(1;1),SRR530636(1;1),
chr12	88450265	-	canonical2nt	TGCTG(AC*)C	C	88450243	-22	expected	1	1	yes	no	yes	0,0,(0,1)	0,0,(0,1)	0,0,(0,1)	0,0,(0,1)	SRR530634(1;1),
chr12	88791940	-	canonical2nt	TTTTT(A*G)T	A	88791919	-19	expected	2	2	no	no	yes	0,0,(2,0)	0,0,(2,0)	0,0,(0,0)	0,0,(0,0)	SRR530640(2;2),
chr12	102156628	-	canonical2nt	TATTA(A*A)T	A	102156607	-19	expected	1	1	yes	no	yes	0,0,(1,0)	0,0,(1,0)	0,0,(1,0)	0,0,(1,0)	SRR530639(1;1),
chr12	113894867	-	canonical2nt	TACCC(TG*)C	G	113894800	-67	distal	1	1	no	no	yes	0,0,(0,1)	0,0,(0,1)	0,0,(0,0)	0,0,(0,0)	SRR530635(1;1),
chr12	113895622	-	canonical2nt	TCCTC(A*G)C	A	113895604	-16	expected	1	1	no	no	yes	0,0,(1,0)	0,0,(1,0)	0,0,(0,0)	0,0,(0,0)	SRR530638(1;1),
chr12	114659030	-	canonical2nt	TGCTC(TG*)T	G	114657279	-1751	distal	1	1	no	no	yes	0,0,(0,1)	0,0,(0,1)	0,0,(0,0)	0,0,(0,0)	SRR530637(1;1),
chr12	25234261	+	canonical2nt	TACTG(A*G)C	A	25234283	-20	expected	1	1	yes	no	yes	0,0,(1,0)	0,0,(1,0)	0,0,(1,0)	0,0,(1,0)	SRR530636(1;1),
chr12	70408580	+	canonical2nt	TACTT(CA*)T	A	70408604	-24	expected	2	1	yes	no	yes	0,0,(0,2)	0,0,(0,1)	0,0,(0,2)	0,0,(0,1)	SRR530635(2;1),
chr12	77666750	+	canonical2nt	TACTA(TA*)T	A	77666770	-20	expected	1	1	yes	no	yes	0,0,(0,1)	0,0,(0,1)	0,0,(0,1)	0,0,(0,1)	SRR530636(1;1),
chr12	82048760	+	canonical2nt	CACTG(A*A)T	A	82048782	-20	expected	1	1	yes	no	yes	0,0,(1,0)	0,0,(1,0)	0,0,(1,0)	0,0,(1,0)	SRR530635(1;1),
chr12	85015973	+	canonical2nt	TACTA(A*G)A	A	85015993	-18	expected	1	1	no	no	yes	0,0,(1,0)	0,0,(1,0)	0,0,(0,0)	0,0,(0,0)	SRR530636(1;1),
chr12	87205651	+	canonical2nt	TGTTA(G*G)T	G	87217440	-11787	distal	1	1	no	no	yes	0,0,(1,0)	0,0,(1,0)	0,0,(0,0)	0,0,(0,0)	SRR530640(1;1),
chr12	103226817	+	canonical2nt	TGCTT(CA*)T	A	103226842	-25	expected	1	1	yes	no	yes	0,0,(0,1)	0,0,(0,1)	0,0,(0,1)	0,0,(0,1)	SRR530638(1;1),
chr12	111903846	+	canonical2nt	TGCTG(A*G)G	A	111903873	-25	expected	1	1	no	no	yes	1,0,(0,0)	1,0,(0,0)	0,0,(0,0)	0,0,(0,0)	SRR530636(1;1),
chr12	113012539	+	canonical2nt	TGCAA(T*G)T	T	113012563	-22	expected	1	1	no	no	yes	1,0,(0,0)	1,0,(0,0)	0,0,(0,0)	0,0,(0,0)	SRR530638(1;1),
chr12	113016205	+	canonical2nt	AGCTG(A*A)C	A	113016230	-23	expected	2	2	yes	yes	yes	1,0,(1,0)	1,0,(1,0)	0,0,(1,0)	0,0,(1,0)	SRR530636(1;1),SRR530639(1;1),
chr12	113841269	+	canonical2nt	CGCTC(A*G)C	A	113841291	-20	expected	3	3	yes	no	yes	0,0,(3,0)	0,0,(3,0)	0,0,(3,0)	0,0,(3,0)	SRR530636(3;3),
chr12	114288704	+	canonical2nt	TACTC(TC*)C	C	114288727	-23	expected	10	9	yes	yes	yes	0,10,(0,0)	0,9,(0,0)	0,3,(0,0)	0,2,(0,0)	SRR530634(1;1),SRR530636(5;4),SRR530635(1;1),SRR530633(3;3),
chr12	114299258	+	canonical2nt	TGTTC(TC*)C	C	114299283	-25	expected	1	1	no	no	yes	0,0,(0,1)	0,0,(0,1)	0,0,(0,0)	0,0,(0,0)	SRR530635(1;1),
chr12	114371692	+	canonical2nt	TATTC(A*A)C	A	114371751	-57	expected	1	1	yes	no	yes	0,0,(1,0)	0,0,(1,0)	0,0,(1,0)	0,0,(1,0)	SRR530635(1;1),
chr13	58495253	-	canonical2nt	TATTA(AG*)T	G	58495229	-24	expected	1	1	yes	no	yes	0,1,(0,0)	0,1,(0,0)	0,1,(0,0)	0,1,(0,0)	SRR530635(1;1),
chr13	85356640	-	canonical2nt	TTCTA(AA*)C	A	85356616	-24	expected	1	1	no	no	yes	0,1,(0,0)	0,1,(0,0)	0,0,(0,0)	0,0,(0,0)	SRR530638(1;1),
chr13	9169875	+	canonical2nt	TACAT(A*A)C	A	9169897	-20	expected	1	1	yes	no	yes	1,0,(0,0)	1,0,(0,0)	1,0,(0,0)	1,0,(0,0)	SRR530636(1;1),
chr13	13802960	+	canonical2nt	AATTC(A*G)T	A	13802990	-28	expected	1	1	yes	no	yes	0,0,(1,0)	0,0,(1,0)	0,0,(1,0)	0,0,(1,0)	SRR530637(1;1),
chr13	13820804	+	canonical2nt	TACTT(CA*)T	A	13820831	-27	expected	1	1	yes	no	yes	0,0,(0,1)	0,0,(0,1)	0,0,(0,1)	0,0,(0,1)	SRR530637(1;1),
chr13	14708978	+	canonical2nt	TGTAG(TA*)T	A	14709003	-25	expected	2	2	yes	yes	yes	1,0,(0,1)	1,0,(0,1)	1,0,(0,1)	1,0,(0,1)	SRR530635(1;1),SRR530637(1;1),
chr13	45503694	+	canonical2nt	TACTA(A*G)T	A	45503724	-28	expected	1	1	yes	no	yes	0,0,(1,0)	0,0,(1,0)	0,0,(1,0)	0,0,(1,0)	SRR530636(1;1),
chr13	49818304	+	canonical2nt	CGTTC(A*A)C	A	49818361	-55	expected	1	1	no	no	yes	0,0,(1,0)	0,0,(1,0)	0,0,(0,0)	0,0,(0,0)	SRR530638(1;1),
chr13	54641035	+	canonical2nt	TGTAC(AA*)C	A	54641064	-29	expected	1	1	yes	no	yes	0,0,(0,1)	0,0,(0,1)	0,0,(0,1)	0,0,(0,1)	SRR530635(1;1),
chr13	55694836	+	canonical2nt	TATTT(CA*)T	A	55694861	-25	expected	1	1	yes	no	yes	0,0,(0,1)	0,0,(0,1)	0,0,(0,1)	0,0,(0,1)	SRR530634(1;1),
chr13	69770082	+	canonical2nt	TCCTG(AA*)T	A	69770112	-30	expected	1	1	yes	no	yes	0,1,(0,0)	0,1,(0,0)	0,1,(0,0)	0,1,(0,0)	SRR530636(1;1),
chr13	73755817	+	canonical2nt	AGCTC(TG*)T	G	73755849	-32	expected	1	1	no	no	yes	0,1,(0,0)	0,1,(0,0)	0,0,(0,0)	0,0,(0,0)	SRR530637(1;1),
chr13	90240479	+	canonical2nt	TAATC(A*G)T	A	90240512	-31	expected	1	1	yes	no	yes	0,0,(1,0)	0,0,(1,0)	0,0,(1,0)	0,0,(1,0)	SRR530636(1;1),
chr13	97160658	+	canonical2nt	TGTTC(A*G)A	A	97161542	-882	distal	1	1	yes	no	yes	0,0,(1,0)	0,0,(1,0)	0,0,(1,0)	0,0,(1,0)	SRR530639(1;1),
chr13	107737889	+	canonical2nt	TACTA(A*G)A	A	107738780	-889	distal	1	1	no	no	yes	0,0,(1,0)	0,0,(1,0)	0,0,(0,0)	0,0,(0,0)	SRR530636(1;1),
chr14	25279330	-	canonical2nt	TGCTC(A*G)G	A	25279299	-29	expected	2	1	yes	no	yes	0,0,(2,0)	0,0,(1,0)	0,0,(2,0)	0,0,(1,0)	SRR530637(2;1),
chr14	31827945	-	canonical2nt	AGTTC(AG*)T	G	31827863	-82	distal	1	1	yes	no	yes	0,1,(0,0)	0,1,(0,0)	0,1,(0,0)	0,1,(0,0)	SRR530639(1;1),
chr14	31997927	-	canonical2nt	TGCTT(A*G)T	A	31997583	-342	distal	1	1	no	no	yes	0,0,(1,0)	0,0,(1,0)	0,0,(0,0)	0,0,(0,0)	SRR530637(1;1),
chr14	47870594	-	canonical2nt	TGTTC(A*G)T	A	47870566	-26	expected	1	1	yes	no	yes	0,0,(1,0)	0,0,(1,0)	0,0,(1,0)	0,0,(1,0)	SRR530638(1;1),
chr14	52823880	-	canonical2nt	TTCTA(TA*)C	A	52823854	-26	expected	1	1	yes	no	yes	0,0,(0,1)	0,0,(0,1)	0,0,(0,1)	0,0,(0,1)	SRR530636(1;1),
chr14	60851020	-	canonical2nt	TGTTA(CA*)T	A	60850993	-27	expected	1	1	yes	no	yes	0,0,(0,1)	0,0,(0,1)	0,0,(0,1)	0,0,(0,1)	SRR530634(1;1),
chr14	72964573	-	canonical2nt	TAATG(AA*)C	A	72964551	-22	expected	1	1	yes	no	yes	0,0,(0,1)	0,0,(0,1)	0,0,(0,1)	0,0,(0,1)	SRR530636(1;1),
chr14	105524027	-	canonical2nt	CATTG(T*G)T	T	105524000	-25	expected	1	1	no	no	yes	0,0,(1,0)	0,0,(1,0)	0,0,(0,0)	0,0,(0,0)	SRR530636(1;1),
chr14	8983979	+	canonical2nt	TGGTT(TA*)C	A	8984008	-29	expected	1	1	no	no	yes	0,1,(0,0)	0,1,(0,0)	0,0,(0,0)	0,0,(0,0)	SRR530634(1;1),
chr14	17255113	+	canonical2nt	TGCTA(TA*)T	A	17255135	-22	expected	1	1	no	no	yes	0,0,(0,1)	0,0,(0,1)	0,0,(0,0)	0,0,(0,0)	SRR530634(1;1),
chr14	30806128	+	canonical2nt	GGCTG(AA*)C	A	30806146	-18	expected	2	2	yes	yes	yes	0,1,(0,1)	0,1,(0,1)	0,0,(0,1)	0,0,(0,1)	SRR530637(1;1),SRR530634(1;1),
chr14	32158619	+	canonical2nt	TGCTT(T*A)G	T	32158644	-23	expected	1	1	no	no	yes	0,0,(1,0)	0,0,(1,0)	0,0,(0,0)	0,0,(0,0)	SRR530636(1;1),
chr14	57309721	+	canonical2nt	TACAA(TG*)C	G	57309743	-22	expected	1	1	yes	no	yes	0,1,(0,0)	0,1,(0,0)	0,1,(0,0)	0,1,(0,0)	SRR530634(1;1),
chr14	65421787	+	canonical2nt	TCCTT(A*G)T	A	65421810	-21	expected	2	2	yes	no	yes	0,0,(2,0)	0,0,(2,0)	0,0,(2,0)	0,0,(2,0)	SRR530635(2;2),
chr14	66465098	+	canonical2nt	TTCTT(A*G)T	A	66465132	-32	expected	1	1	yes	no	yes	0,0,(1,0)	0,0,(1,0)	0,0,(1,0)	0,0,(1,0)	SRR530634(1;1),
chr14	66927547	+	canonical2nt	TGCTG(AC*)T	C	66927571	-24	expected	1	1	yes	no	yes	0,0,(0,1)	0,0,(0,1)	0,0,(0,1)	0,0,(0,1)	SRR530635(1;1),
chr14	121325392	+	canonical2nt	TCTTG(A*G)C	A	121325422	-28	expected	1	1	yes	no	yes	0,0,(1,0)	0,0,(1,0)	0,0,(1,0)	0,0,(1,0)	SRR530634(1;1),
chr15	8277167	-	canonical2nt	TAGTC(A*G)C	A	8277142	-23	expected	1	1	yes	no	yes	0,0,(1,0)	0,0,(1,0)	0,0,(1,0)	0,0,(1,0)	SRR530637(1;1),
chr15	31520831	-	canonical2nt	GACTG(A*G)T	A	31520810	-19	expected	2	1	no	no	yes	2,0,(0,0)	1,0,(0,0)	0,0,(0,0)	0,0,(0,0)	SRR530636(2;1),
chr15	34372558	-	canonical2nt	TGTTC(A*A)G	A	34372535	-21	expected	2	1	yes	no	yes	0,0,(2,0)	0,0,(1,0)	0,0,(2,0)	0,0,(1,0)	SRR530635(2;1),
chr15	36532756	-	canonical2nt	AGCTT(TA*)T	A	36532740	-16	expected	1	1	no	no	yes	0,1,(0,0)	0,1,(0,0)	0,0,(0,0)	0,0,(0,0)	SRR530637(1;1),
chr15	50663017	-	canonical2nt	AGTTG(A*A)T	A	50662552	-463	distal	1	1	yes	no	yes	1,0,(0,0)	1,0,(0,0)	1,0,(0,0)	1,0,(0,0)	SRR530640(1;1),
chr15	51629287	-	canonical2nt	TTCTC(A*G)T	A	51629258	-27	expected	1	1	yes	no	yes	0,0,(1,0)	0,0,(1,0)	0,0,(1,0)	0,0,(1,0)	SRR530636(1;1),
chr15	57947423	-	canonical2nt	TACTG(A*A)A	A	57947401	-20	expected	1	1	no	no	yes	1,0,(0,0)	1,0,(0,0)	0,0,(0,0)	0,0,(0,0)	SRR530640(1;1),
chr15	75880613	-	canonical2nt	TGCTC(A*G)A	A	75880542	-69	distal	1	1	no	no	yes	0,0,(1,0)	0,0,(1,0)	0,0,(0,0)	0,0,(0,0)	SRR530634(1;1),
chr15	78401253	-	canonical2nt	TCCTG(CA*)T	A	78401233	-20	expected	2	2	yes	yes	yes	0,0,(0,2)	0,0,(0,2)	0,0,(0,2)	0,0,(0,2)	SRR530637(1;1),SRR530636(1;1),
chr15	79908556	-	canonical2nt	TGCTA(A*G)C	A	79908536	-18	expected	1	1	no	no	yes	1,0,(0,0)	1,0,(0,0)	0,0,(0,0)	0,0,(0,0)	SRR530640(1;1),
chr15	83209651	-	canonical2nt	TGCTA(A*G)A	A	83209625	-24	expected	1	1	yes	no	yes	0,0,(1,0)	0,0,(1,0)	0,0,(1,0)	0,0,(1,0)	SRR530635(1;1),
chr15	88522340	-	canonical2nt	GACTG(A*G)C	A	88522314	-24	expected	1	1	no	no	yes	1,0,(0,0)	1,0,(0,0)	0,0,(0,0)	0,0,(0,0)	SRR530640(1;1),
chr15	96247639	-	canonical2nt	TACAA(A*G)C	A	96247620	-17	expected	2	2	yes	yes	yes	2,0,(0,0)	2,0,(0,0)	2,0,(0,0)	2,0,(0,0)	SRR530637(1;1),SRR530636(1;1),
chr15	98557384	-	canonical2nt	AGTTC(A*G)T	A	98557364	-18	expected	1	1	yes	no	yes	0,0,(1,0)	0,0,(1,0)	0,0,(1,0)	0,0,(1,0)	SRR530636(1;1),
chr15	98644496	-	canonical2nt	TACTG(A*G)C	A	98644474	-20	expected	1	1	yes	no	yes	0,0,(1,0)	0,0,(1,0)	0,0,(1,0)	0,0,(1,0)	SRR530636(1;1),
chr15	99566887	-	canonical2nt	TACTG(CA*)T	A	99566867	-20	expected	1	1	yes	no	yes	0,0,(0,1)	0,0,(0,1)	0,0,(0,1)	0,0,(0,1)	SRR530635(1;1),
chr15	4051782	+	canonical2nt	TGCTC(TA*)T	A	4051803	-21	expected	2	1	yes	no	yes	0,0,(0,2)	0,0,(0,1)	0,0,(0,2)	0,0,(0,1)	SRR530636(2;1),
chr15	6729164	+	canonical2nt	TGTTC(A*G)T	A	6729187	-21	expected	1	1	yes	no	yes	0,0,(1,0)	0,0,(1,0)	0,0,(1,0)	0,0,(1,0)	SRR530634(1;1),
chr15	12070153	+	canonical2nt	TACTT(A*A)C	A	12070188	-33	expected	2	2	yes	no	yes	0,0,(2,0)	0,0,(2,0)	0,0,(2,0)	0,0,(2,0)	SRR530638(2;2),
chr15	34064309	+	canonical2nt	TACCA(T*A)T	T	34066441	-2130	distal	1	1	yes	no	yes	1,0,(0,0)	1,0,(0,0)	1,0,(0,0)	1,0,(0,0)	SRR530634(1;1),
chr15	73587198	+	canonical2nt	GGCTT(T*A)T	T	73587226	-26	expected	1	1	no	no	yes	0,0,(1,0)	0,0,(1,0)	0,0,(0,0)	0,0,(0,0)	SRR530634(1;1),
chr15	76543788	+	canonical2nt	TGCTG(GC*)C	C	76543830	-42	expected	1	1	yes	no	yes	0,0,(0,1)	0,0,(0,1)	0,0,(0,1)	0,0,(0,1)	SRR530636(1;1),
chr15	76734949	+	canonical2nt	TACAA(T*A)C	T	76734968	-17	expected	1	1	no	no	yes	1,0,(0,0)	1,0,(0,0)	0,0,(0,0)	0,0,(0,0)	SRR530637(1;1),
chr15	78716268	+	canonical2nt	TGCTG(CC*)C	C	78716293	-25	expected	1	1	yes	no	yes	0,0,(0,1)	0,0,(0,1)	0,0,(0,1)	0,0,(0,1)	SRR530636(1;1),
chr15	78963407	+	canonical2nt	GGCTG(A*G)T	A	78963429	-20	expected	1	1	yes	no	yes	0,0,(1,0)	0,0,(1,0)	0,0,(1,0)	0,0,(1,0)	SRR530634(1;1),
chr15	80797518	+	canonical2nt	TGTTG(A*G)A	A	80797541	-21	expected	1	1	yes	no	yes	0,0,(1,0)	0,0,(1,0)	0,0,(1,0)	0,0,(1,0)	SRR530634(1;1),
chr15	88915319	+	canonical2nt	TACCC(A*G)C	A	88915332	-11	expected	2	2	yes	no	yes	0,0,(2,0)	0,0,(2,0)	0,0,(2,0)	0,0,(2,0)	SRR530636(2;2),
chr15	89095531	+	canonical2nt	TGCTG(A*G)G	A	89095559	-26	expected	1	1	no	no	yes	0,0,(1,0)	0,0,(1,0)	0,0,(0,0)	0,0,(0,0)	SRR530638(1;1),
chr15	89362036	+	canonical2nt	AGCTC(A*A)C	A	89362056	-18	expected	1	1	no	no	yes	0,0,(1,0)	0,0,(1,0)	0,0,(0,0)	0,0,(0,0)	SRR530634(1;1),
chr15	98905745	+	canonical2nt	TCCTC(A*G)T	A	98905780	-33	expected	2	2	yes	no	yes	0,0,(2,0)	0,0,(2,0)	0,0,(1,0)	0,0,(1,0)	SRR530636(2;2),
chr15	102309026	+	canonical2nt	TTCTA(A*G)C	A	102309046	-18	expected	1	1	yes	no	yes	0,0,(1,0)	0,0,(1,0)	0,0,(1,0)	0,0,(1,0)	SRR530636(1;1),
chr15	103355208	+	canonical2nt	TACTT(CA*)T	A	103355228	-20	expected	6	6	yes	yes	yes	0,0,(0,6)	0,0,(0,6)	0,0,(0,6)	0,0,(0,6)	SRR530636(2;2),SRR530638(4;4),
chr16	8710238	-	canonical2nt	TGCTG(A*A)G	A	8709040	-1196	distal	1	1	no	no	yes	0,0,(1,0)	0,0,(1,0)	0,0,(0,0)	0,0,(0,0)	SRR530634(1;1),
chr16	17092903	-	canonical2nt	TGCAG(A*G)C	A	17092884	-17	expected	2	2	yes	yes	yes	1,0,(1,0)	1,0,(1,0)	0,0,(1,0)	0,0,(1,0)	SRR530633(1;1),SRR530636(1;1),
chr16	17095157	-	canonical2nt	TGCTC(CG*)T	G	17095136	-21	expected	1	1	no	no	yes	0,1,(0,0)	0,1,(0,0)	0,0,(0,0)	0,0,(0,0)	SRR530638(1;1),
chr16	17364128	-	canonical2nt	TGCTT(CA*)T	A	17364105	-23	expected	1	1	no	no	yes	0,0,(0,1)	0,0,(0,1)	0,0,(0,0)	0,0,(0,0)	SRR530636(1;1),
chr16	18797517	-	canonical2nt	AGCTT(T*A)C	T	18797492	-23	expected	1	1	no	no	yes	0,0,(1,0)	0,0,(1,0)	0,0,(0,0)	0,0,(0,0)	SRR530636(1;1),
chr16	18811485	-	canonical2nt	TGTTC(A*A)C	A	18811457	-26	expected	1	1	yes	no	yes	0,0,(1,0)	0,0,(1,0)	0,0,(1,0)	0,0,(1,0)	SRR530636(1;1),
chr16	38545996	-	canonical2nt	TGCTC(T*G)A	T	38545966	-28	expected	1	1	no	no	yes	1,0,(0,0)	1,0,(0,0)	0,0,(0,0)	0,0,(0,0)	SRR530634(1;1),
chr16	90257669	-	canonical2nt	TGGTT(T*A)T	T	90257647	-20	expected	1	1	no	no	yes	0,0,(1,0)	0,0,(1,0)	0,0,(0,0)	0,0,(0,0)	SRR530633(1;1),
chr16	5238719	+	canonical2nt	TGCTG(AT*)C	T	5238737	-18	expected	1	1	no	no	yes	0,0,(0,1)	0,0,(0,1)	0,0,(0,0)	0,0,(0,0)	SRR530634(1;1),
chr16	8485938	+	canonical2nt	CACTC(A*G)T	A	8485957	-17	expected	1	1	yes	no	yes	0,0,(1,0)	0,0,(1,0)	0,0,(1,0)	0,0,(1,0)	SRR530637(1;1),
chr16	14419767	+	canonical2nt	TGCTG(A*G)T	A	14419792	-23	expected	1	1	yes	no	yes	0,0,(1,0)	0,0,(1,0)	0,0,(1,0)	0,0,(1,0)	SRR530635(1;1),
chr16	17026087	+	canonical2nt	TATTC(T*G)T	T	17026118	-29	expected	1	1	no	no	yes	0,0,(1,0)	0,0,(1,0)	0,0,(0,0)	0,0,(0,0)	SRR530637(1;1),
chr16	18070172	+	canonical2nt	TACTC(A*A)G	A	18070183	-9	proximal	3	3	no	yes	yes	0,0,(3,0)	0,0,(3,0)	0,0,(0,0)	0,0,(0,0)	SRR530635(1;1),SRR530636(2;2),
chr16	18252200	+	canonical2nt	TATTC(CA*)T	A	18252218	-18	expected	2	2	yes	yes	yes	0,0,(0,2)	0,0,(0,2)	0,0,(0,2)	0,0,(0,2)	SRR530637(1;1),SRR530635(1;1),
chr16	20674279	+	canonical2nt	TGCTG(A*A)C	A	20674300	-19	expected	2	1	no	no	yes	2,0,(0,0)	1,0,(0,0)	0,0,(0,0)	0,0,(0,0)	SRR530634(2;1),
chr16	20682092	+	canonical2nt	TACTT(CA*)C	A	20682114	-22	expected	2	2	yes	yes	yes	0,0,(0,2)	0,0,(0,2)	0,0,(0,2)	0,0,(0,2)	SRR530636(1;1),SRR530638(1;1),
chr16	22870990	+	canonical2nt	TGCTC(CA*)C	A	22871012	-22	expected	1	1	yes	no	yes	0,0,(0,1)	0,0,(0,1)	0,0,(0,1)	0,0,(0,1)	SRR530634(1;1),
chr16	23111868	+	canonical2nt	TATTG(AA*)C	A	23111889	-21	expected	2	2	yes	yes	yes	1,0,(0,1)	1,0,(0,1)	0,0,(0,1)	0,0,(0,1)	SRR530636(1;1),SRR530637(1;1),
chr16	32623433	+	canonical2nt	TAGTA(TA*)T	A	32623457	-24	expected	1	1	yes	no	yes	0,0,(0,1)	0,0,(0,1)	0,0,(0,1)	0,0,(0,1)	SRR530640(1;1),
chr16	33735603	+	canonical2nt	GGCTT(A*A)T	A	33735626	-21	expected	2	2	yes	no	yes	0,0,(2,0)	0,0,(2,0)	0,0,(2,0)	0,0,(2,0)	SRR530637(2;2),
chr16	36929308	+	canonical2nt	TGCTA(CA*)T	A	36929341	-33	expected	1	1	yes	no	yes	0,0,(0,1)	0,0,(0,1)	0,0,(0,1)	0,0,(0,1)	SRR530637(1;1),
chr16	36961495	+	canonical2nt	TAGTT(A*G)T	A	36961519	-22	expected	1	1	yes	no	yes	0,0,(1,0)	0,0,(1,0)	0,0,(1,0)	0,0,(1,0)	SRR530634(1;1),
chr16	42876100	+	canonical2nt	TGCGG(AG*)C	G	42907789	-31689	distal	1	1	no	no	yes	0,0,(0,1)	0,0,(0,1)	0,0,(0,0)	0,0,(0,0)	SRR530636(1;1),
chr16	44727113	+	canonical2nt	TACTG(A*G)T	A	44727140	-25	expected	2	2	yes	no	yes	0,0,(2,0)	0,0,(2,0)	0,0,(2,0)	0,0,(2,0)	SRR530637(2;2),
chr16	91675610	+	canonical2nt	TGTAA(A*A)T	A	91675645	-33	expected	1	1	yes	no	yes	1,0,(0,0)	1,0,(0,0)	1,0,(0,0)	1,0,(0,0)	SRR530637(1;1),
chr16	96374554	+	canonical2nt	TGTTT(CA*)C	A	96374577	-23	expected	1	1	yes	no	yes	0,0,(0,1)	0,0,(0,1)	0,0,(0,1)	0,0,(0,1)	SRR530640(1;1),
chr17	6056778	-	canonical2nt	TATTC(A*G)G	A	6056757	-19	expected	2	1	yes	no	yes	0,0,(2,0)	0,0,(1,0)	0,0,(2,0)	0,0,(1,0)	SRR530636(2;1),
chr17	24655767	-	canonical2nt	TATTG(CA*)T	A	24655744	-23	expected	4	3	yes	yes	yes	0,0,(0,4)	0,0,(0,3)	0,0,(0,4)	0,0,(0,3)	SRR530637(3;2),SRR530636(1;1),
chr17	24843131	-	canonical2nt	CACTC(A*G)C	A	24843111	-18	expected	1	1	yes	no	yes	0,0,(1,0)	0,0,(1,0)	0,0,(1,0)	0,0,(1,0)	SRR530635(1;1),
chr17	26021771	-	canonical2nt	TGCTA(A*G)T	A	26021747	-22	expected	1	1	yes	no	yes	0,0,(1,0)	0,0,(1,0)	0,0,(1,0)	0,0,(1,0)	SRR530635(1;1),
chr17	32449346	-	canonical2nt	TCCTC(A*G)T	A	32449318	-26	expected	1	1	yes	no	yes	0,0,(1,0)	0,0,(1,0)	0,0,(1,0)	0,0,(1,0)	SRR530635(1;1),
chr17	35087441	-	canonical2nt	TGCTG(AA*)A	A	35087420	-21	expected	18	18	yes	yes	yes	3,2,(8,5)	3,2,(8,5)	0,0,(8,5)	0,0,(8,5)	SRR530638(4;4),SRR530637(7;7),SRR530635(1;1),SRR530636(2;2),SRR530634(4;4),
chr17	35135703	-	canonical2nt	TATGG(AG*)T	G	35135170	-533	distal	1	1	no	no	yes	0,0,(0,1)	0,0,(0,1)	0,0,(0,0)	0,0,(0,0)	SRR530638(1;1),
chr17	35290709	-	canonical2nt	TGTTT(TA*)C	A	35290685	-24	expected	1	1	yes	no	yes	0,0,(0,1)	0,0,(0,1)	0,0,(0,1)	0,0,(0,1)	SRR530635(1;1),
chr17	36404791	-	canonical2nt	TGTTC(T*A)T	T	36404165	-624	distal	1	1	no	no	yes	0,0,(1,0)	0,0,(1,0)	0,0,(0,0)	0,0,(0,0)	SRR530639(1;1),
chr17	45708151	-	canonical2nt	TGCTG(AT*)C	T	45708126	-25	expected	3	3	no	yes	yes	0,0,(0,3)	0,0,(0,3)	0,0,(0,0)	0,0,(0,0)	SRR530639(1;1),SRR530640(1;1),SRR530637(1;1),
chr17	45815978	-	canonical2nt	TGCTG(CA*)C	A	45815950	-28	expected	1	1	yes	no	yes	0,0,(0,1)	0,0,(0,1)	0,0,(0,1)	0,0,(0,1)	SRR530636(1;1),
chr17	46915251	-	canonical2nt	TGGTG(A*A)C	A	46915220	-29	expected	2	2	no	no	yes	2,0,(0,0)	2,0,(0,0)	0,0,(0,0)	0,0,(0,0)	SRR530635(2;2),
chr17	47119347	-	canonical2nt	TGTTT(CA*)T	A	47119322	-25	expected	2	2	yes	yes	yes	0,0,(0,2)	0,0,(0,2)	0,0,(0,2)	0,0,(0,2)	SRR530637(1;1),SRR530636(1;1),
chr17	56574471	-	canonical2nt	TGCTC(CA*)T	A	56574437	-34	expected	1	1	yes	no	yes	0,0,(0,1)	0,0,(0,1)	0,0,(0,1)	0,0,(0,1)	SRR530633(1;1),
chr17	57164518	-	canonical2nt	TACTC(A*G)T	A	57164501	-15	expected	1	1	no	no	yes	0,0,(1,0)	0,0,(1,0)	0,0,(0,0)	0,0,(0,0)	SRR530636(1;1),
chr17	64636490	-	canonical2nt	TGCTT(GA*)C	A	64636463	-27	expected	1	1	yes	no	yes	0,0,(0,1)	0,0,(0,1)	0,0,(0,1)	0,0,(0,1)	SRR530637(1;1),
chr17	65932119	-	canonical2nt	TGTTA(A*A)G	A	65932093	-24	expected	1	1	yes	no	yes	0,0,(1,0)	0,0,(1,0)	0,0,(1,0)	0,0,(1,0)	SRR530640(1;1),
chr17	71194634	-	canonical2nt	TATTG(A*A)G	A	71194612	-20	expected	1	1	yes	no	yes	0,0,(1,0)	0,0,(1,0)	0,0,(1,0)	0,0,(1,0)	SRR530637(1;1),
chr17	80443929	-	canonical2nt	TGTTA(AA*)A	A	80443905	-24	expected	1	1	no	no	yes	0,1,(0,0)	0,1,(0,0)	0,0,(0,0)	0,0,(0,0)	SRR530634(1;1),
chr17	85109775	-	canonical2nt	TAGTG(A*A)C	A	85109746	-27	expected	1	1	yes	no	yes	0,0,(1,0)	0,0,(1,0)	0,0,(1,0)	0,0,(1,0)	SRR530638(1;1),
chr17	85153961	-	canonical2nt	TGCAA(T*G)T	T	85153938	-21	expected	1	1	yes	no	yes	1,0,(0,0)	1,0,(0,0)	1,0,(0,0)	1,0,(0,0)	SRR530634(1;1),
chr17	24857186	+	canonical2nt	TGCTG(AT*)T	T	24857217	-31	expected	1	1	no	no	yes	0,0,(0,1)	0,0,(0,1)	0,0,(0,0)	0,0,(0,0)	SRR530637(1;1),
chr17	28467747	+	canonical2nt	AGCTT(A*G)C	A	28467774	-25	expected	4	4	yes	yes	yes	0,1,(3,0)	0,1,(3,0)	0,0,(2,0)	0,0,(2,0)	SRR530636(1;1),SRR530634(1;1),SRR530635(2;2),
chr17	29838407	+	canonical2nt	TCCTG(AG*)T	G	29838429	-22	expected	2	2	yes	yes	yes	1,0,(0,1)	1,0,(0,1)	0,0,(0,1)	0,0,(0,1)	SRR530634(1;1),SRR530637(1;1),
chr17	35151545	+	canonical2nt	TACTG(CC*)T	C	35151566	-21	expected	4	4	yes	yes	yes	0,0,(0,4)	0,0,(0,4)	0,0,(0,1)	0,0,(0,1)	SRR530637(1;1),SRR530639(1;1),SRR530634(2;2),
chr17	35985932	+	canonical2nt	TGTTC(TA*)C	A	35985951	-19	expected	1	1	yes	no	yes	0,0,(0,1)	0,0,(0,1)	0,0,(0,1)	0,0,(0,1)	SRR530636(1;1),
chr17	36054127	+	canonical2nt	TTTTG(TG*)T	G	36054142	-15	expected	1	1	no	no	yes	0,1,(0,0)	0,1,(0,0)	0,0,(0,0)	0,0,(0,0)	SRR530635(1;1),
chr17	46635568	+	canonical2nt	TAGTA(A*G)T	A	46635591	-21	expected	1	1	yes	no	yes	0,0,(1,0)	0,0,(1,0)	0,0,(1,0)	0,0,(1,0)	SRR530636(1;1),
chr17	46858598	+	canonical2nt	TGCTG(AC*)C	C	46858618	-20	expected	2	2	yes	no	yes	0,0,(0,2)	0,0,(0,2)	0,0,(0,2)	0,0,(0,2)	SRR530637(2;2),
[truncated: 8,855 more rows]
