# Supplementary material for: TechCrunch Interview With Mark Zuckerberg On $100 Million Education Donation
Source: HighWire-hosted journal article supplement (doi:10.1101/gr.202820.115), 2010-01-01
Supplement: Supplemental_Table_S4.xlsx [file Supplemental_Table_S4.xlsx]

## Sheet: BP_table_5_pombe.txt
Branchpoint coordinate			Motif Model	Branchpoint Sequence - ( ) around bulge, * - BP nucleotide	BP nucleotide	3'ss	BP-3'ss distance	BP position	Total Read Evidence	Unique Read Evidence	Mutation in at Least 1 Read	Discovered in Multiple RNAseq Sources	Discovered in unbiased RNAseq source	Total Read Count (by position)	Unique Read Count (by position)	Read Count with Mutation (by position)	Unique Read Count with Mutation (by position)	RNAseq Source
AB325691	9380	-	canonical	TATTG(A*)C	A	9365	-15	expected	47	37	yes	yes	yes	2,4,(41)	2,4,(31)	0,4,(37)	0,4,(28)	SRR957843(35;28),SRR957844(12;9),
AB325691	9411	-	canonical	TACTA(A*)T	A	9365	-46	expected	1	1	yes	no	yes	0,0,(1)	0,0,(1)	0,0,(1)	0,0,(1)	SRR957843(1;1),
I	181854	-	canonical	TACTA(A*)C	A	181749	-105	distal	10	8	yes	yes	yes	0,2,(8)	0,2,(6)	0,0,(8)	0,0,(6)	SRR957844(3;2),SRR957843(7;6),
I	242831	-	canonical	TATTA(A*)T	A	242815	-16	expected	1	1	yes	no	yes	0,0,(1)	0,0,(1)	0,0,(1)	0,0,(1)	SRR957842(1;1),
I	256151	-	canonical	TACTA(A*)C	A	256134	-17	expected	1	1	yes	no	yes	0,0,(1)	0,0,(1)	0,0,(1)	0,0,(1)	SRR957843(1;1),
I	301272	-	canonical	TACTA(A*)C	A	301263	-9	proximal	6	6	yes	yes	yes	1,0,(5)	1,0,(5)	0,0,(5)	0,0,(5)	SRR957843(5;5),SRR957844(1;1),
I	346450	-	canonical	AACTA(A*)C	A	346439	-11	expected	5	4	yes	yes	yes	0,1,(4)	0,1,(3)	0,0,(4)	0,0,(3)	SRR957844(1;1),SRR957843(4;3),
I	375840	-	canonical	TACTT(A*)C	A	375830	-10	proximal	94	53	yes	yes	yes	2,3,(89)	2,3,(48)	2,0,(81)	2,0,(40)	SRR957843(57;33),SRR957844(37;20),
I	376456	-	canonical	TACTA(A*)C	A	376446	-10	proximal	26	21	yes	yes	yes	1,0,(25)	1,0,(20)	0,0,(24)	0,0,(19)	SRR957844(9;8),SRR957843(17;13),
I	482197	-	canonical	TACTA(A*)C	A	482185	-12	expected	2	1	no	no	yes	0,2,(0)	0,1,(0)	0,0,(0)	0,0,(0)	SRR957843(2;1),
I	509494	-	canonical	GACTA(A*)C	A	509485	-9	proximal	22	18	yes	yes	yes	4,1,(17)	3,1,(14)	3,0,(13)	2,0,(11)	SRR957843(12;11),SRR957844(10;7),
I	580990	-	canonical	TACTA(A*)T	A	580983	-7	proximal	7	6	yes	yes	yes	1,0,(6)	1,0,(5)	0,0,(6)	0,0,(5)	SRR957844(3;2),SRR957843(4;4),
I	605365	-	canonical	TGCTA(A*)C	A	605355	-10	proximal	5	4	yes	yes	yes	0,0,(5)	0,0,(4)	0,0,(5)	0,0,(4)	SRR957843(3;2),SRR957844(2;2),
I	641193	-	canonical	TTCTA(A*)C	A	641184	-9	proximal	30	18	yes	yes	yes	4,2,(24)	3,2,(13)	1,0,(24)	1,0,(13)	SRR957844(9;6),SRR957843(21;12),
I	642143	-	canonical	TGCTA(A*)C	A	642131	-12	expected	74	48	yes	yes	yes	10,16,(48)	8,11,(29)	5,1,(44)	4,1,(27)	SRR957844(44;29),SRR957843(30;19),
I	709353	-	canonical	GACTA(A*)C	A	709339	-14	expected	26	17	yes	yes	yes	3,4,(19)	2,3,(12)	3,2,(19)	2,2,(12)	SRR957843(12;9),SRR957844(14;8),
I	709653	-	canonical	TACTA(A*)C	A	709644	-9	proximal	35	21	yes	yes	yes	5,10,(20)	4,6,(11)	0,1,(20)	0,1,(11)	SRR957843(15;9),SRR957844(20;12),
I	727912	-	canonical	TATTA(A*)C	A	727901	-11	expected	156	65	yes	yes	yes	7,19,(130)	6,14,(45)	1,0,(107)	1,0,(30)	SRR957841(2;2),SRR957842(5;4),SRR957843(88;31),SRR957844(61;28),
I	753088	-	canonical	TATTA(A*)C	A	753079	-9	proximal	1	1	yes	no	yes	0,0,(1)	0,0,(1)	0,0,(1)	0,0,(1)	SRR957844(1;1),
I	756622	-	canonical	TATTA(A*)C	A	756610	-12	expected	15	12	yes	yes	yes	0,5,(10)	0,4,(8)	0,0,(7)	0,0,(5)	SRR957843(12;10),SRR957844(3;2),
I	756889	-	canonical	TACTA(A*)T	A	756881	-8	proximal	3	3	yes	yes	yes	1,0,(2)	1,0,(2)	0,0,(2)	0,0,(2)	SRR957844(2;2),SRR957843(1;1),
I	775284	-	canonical	CACTT(A*)T	A	774403	-881	distal	2	2	yes	yes	yes	0,0,(2)	0,0,(2)	0,0,(2)	0,0,(2)	SRR957843(1;1),SRR957844(1;1),
I	775298	-	canonical	TATTA(A*)C	A	775290	-8	proximal	2	2	yes	no	yes	0,0,(2)	0,0,(2)	0,0,(1)	0,0,(1)	SRR957844(2;2),
I	775526	-	canonical	AACTA(A*)C	A	775513	-13	expected	1	1	yes	no	yes	0,0,(1)	0,0,(1)	0,0,(1)	0,0,(1)	SRR957844(1;1),
I	782343	-	canonical	TGCTA(A*)C	A	782336	-7	proximal	1	1	no	no	yes	1,0,(0)	1,0,(0)	0,0,(0)	0,0,(0)	SRR957843(1;1),
I	792959	-	canonical	TTTTA(A*)C	A	792949	-10	proximal	4	3	yes	no	yes	0,0,(4)	0,0,(3)	0,0,(4)	0,0,(3)	SRR957843(4;3),
I	821130	-	canonical	TGCTA(A*)C	A	821118	-12	expected	5	4	yes	yes	yes	0,1,(4)	0,1,(3)	0,1,(4)	0,1,(3)	SRR957844(4;3),SRR957843(1;1),
I	827685	-	canonical	TTCTA(A*)C	A	827678	-7	proximal	2	2	yes	yes	yes	0,1,(1)	0,1,(1)	0,1,(1)	0,1,(1)	SRR957843(1;1),SRR957844(1;1),
I	829434	-	canonical	TTCTA(A*)T	A	829424	-10	proximal	3	3	yes	yes	yes	0,0,(3)	0,0,(3)	0,0,(3)	0,0,(3)	SRR957844(2;2),SRR957843(1;1),
I	879847	-	canonical	TACTA(A*)T	A	879835	-12	expected	33	20	yes	yes	yes	1,0,(32)	1,0,(19)	0,0,(28)	0,0,(16)	SRR957843(20;11),SRR957844(13;9),
I	906159	-	canonical	TGCTG(A*)T	A	906144	-15	expected	21	13	yes	yes	yes	9,0,(12)	7,0,(6)	0,0,(12)	0,0,(6)	SRR957843(11;8),SRR957844(10;5),
I	925863	-	canonical	TACTA(A*)T	A	925857	-6	proximal	17	14	yes	yes	yes	0,1,(16)	0,1,(13)	0,0,(15)	0,0,(12)	SRR957843(9;6),SRR957844(8;8),
I	927390	-	canonical	TGCTA(A*)C	A	927381	-9	proximal	5	5	yes	yes	yes	2,0,(3)	2,0,(3)	0,0,(3)	0,0,(3)	SRR957843(4;4),SRR957844(1;1),
I	935682	-	canonical	TGTTA(A*)C	A	935668	-14	expected	3	3	no	yes	yes	1,1,(1)	1,1,(1)	0,0,(0)	0,0,(0)	SRR957843(2;2),SRR957844(1;1),
I	956284	-	canonical	AGCTA(A*)T	A	956272	-12	expected	9	7	no	yes	yes	9,0,(0)	7,0,(0)	0,0,(0)	0,0,(0)	SRR957843(5;4),SRR957844(4;3),
I	976146	-	canonical	TACTA(A*)C	A	976137	-9	proximal	5	5	yes	yes	yes	0,1,(4)	0,1,(4)	0,0,(4)	0,0,(4)	SRR957843(3;3),SRR957844(2;2),
I	980040	-	canonical	TGCTA(A*)C	A	980026	-14	expected	1	1	no	no	yes	0,1,(0)	0,1,(0)	0,0,(0)	0,0,(0)	SRR957844(1;1),
I	980783	-	canonical	AGCTA(A*)C	A	980774	-9	proximal	3	3	yes	no	yes	0,0,(3)	0,0,(3)	0,0,(3)	0,0,(3)	SRR957843(3;3),
I	1043798	-	canonical	AATTA(A*)C	A	1043789	-9	proximal	30	26	yes	yes	yes	0,5,(25)	0,5,(21)	0,2,(23)	0,2,(19)	SRR957843(15;14),SRR957844(15;12),
I	1089053	-	canonical	CGCTA(A*)C	A	1089044	-9	proximal	6	6	yes	yes	yes	1,0,(5)	1,0,(5)	0,0,(5)	0,0,(5)	SRR957844(1;1),SRR957843(5;5),
I	1094932	-	canonical	TACTA(A*)C	A	1094920	-12	expected	1	1	no	no	yes	1,0,(0)	1,0,(0)	0,0,(0)	0,0,(0)	SRR957843(1;1),
I	1135072	-	canonical	TCCTA(A*)C	A	1135061	-11	expected	158	83	yes	yes	yes	16,25,(117)	12,21,(50)	11,2,(97)	7,2,(37)	SRR957843(105;50),SRR957844(53;33),
I	1135419	-	canonical	TGCTA(A*)C	A	1135402	-17	expected	7	5	yes	yes	yes	1,0,(6)	1,0,(4)	0,0,(6)	0,0,(4)	SRR957843(6;4),SRR957844(1;1),
I	1135789	-	canonical	TATTA(A*)C	A	1135776	-13	expected	18	15	yes	yes	yes	0,1,(17)	0,1,(14)	0,0,(15)	0,0,(12)	SRR957843(11;9),SRR957844(7;6),
I	1171282	-	canonical	TGCTA(A*)C	A	1171270	-12	expected	2	2	yes	no	yes	0,0,(2)	0,0,(2)	0,0,(2)	0,0,(2)	SRR957843(2;2),
I	1173217	-	canonical	AACTA(A*)C	A	1173207	-10	proximal	2	2	no	yes	yes	1,0,(1)	1,0,(1)	0,0,(0)	0,0,(0)	SRR957843(2;2),
I	1194418	-	canonical	TGCTA(A*)C	A	1194407	-11	expected	12	10	yes	yes	yes	4,0,(8)	3,0,(7)	0,0,(8)	0,0,(7)	SRR957844(6;5),SRR957843(6;5),
I	1194641	-	canonical	TGCTA(A*)C	A	1194631	-10	proximal	7	7	yes	yes	yes	0,2,(5)	0,2,(5)	0,0,(5)	0,0,(5)	SRR957843(5;5),SRR957844(2;2),
I	1252818	-	canonical	TATTA(A*)C	A	1252807	-11	expected	72	35	yes	yes	yes	0,0,(72)	0,0,(35)	0,0,(71)	0,0,(34)	SRR957843(36;17),SRR957844(36;18),
I	1282175	-	canonical	TGCTA(A*)C	A	1282167	-8	proximal	12	10	yes	yes	yes	4,0,(8)	3,0,(7)	0,0,(6)	0,0,(5)	SRR957843(9;7),SRR957844(3;3),
I	1300489	-	canonical	TACTA(A*)C	A	1300480	-9	proximal	28	23	yes	yes	yes	4,8,(16)	4,7,(12)	3,0,(15)	3,0,(11)	SRR957843(19;14),SRR957844(9;9),
I	1339390	-	canonical	GACTA(A*)C	A	1339375	-15	expected	3	3	yes	no	yes	0,0,(3)	0,0,(3)	0,0,(2)	0,0,(2)	SRR957843(3;3),
I	1353250	-	canonical	TACTA(A*)T	A	1353236	-14	expected	526	100	yes	yes	yes	13,33,(480)	10,23,(67)	0,8,(463)	0,7,(55)	SRR957844(203;40),SRR957843(323;60),
I	1380986	-	canonical	CACTA(A*)C	A	1380975	-11	expected	45	37	yes	yes	yes	7,4,(34)	7,4,(26)	2,0,(31)	2,0,(23)	SRR957843(23;19),SRR957844(22;18),
I	1381335	-	canonical	AGCTA(A*)C	A	1381326	-9	proximal	8	7	yes	yes	yes	2,1,(5)	2,1,(4)	0,0,(5)	0,0,(4)	SRR957844(2;2),SRR957843(6;5),
I	1383236	-	canonical	TACTA(A*)C	A	1383224	-12	expected	1	1	yes	no	yes	0,0,(1)	0,0,(1)	0,0,(1)	0,0,(1)	SRR957841(1;1),
I	1402473	-	canonical	GACTA(A*)C	A	1402464	-9	proximal	55	31	yes	yes	yes	0,1,(54)	0,1,(30)	0,0,(53)	0,0,(29)	SRR957844(29;15),SRR957843(26;16),
I	1418449	-	canonical	TATTA(A*)C	A	1418440	-9	proximal	10	8	yes	yes	yes	1,0,(9)	1,0,(7)	0,0,(9)	0,0,(7)	SRR957843(2;2),SRR957844(8;6),
I	1429626	-	canonical	TACTA(A*)C	A	1429617	-9	proximal	3	3	yes	yes	yes	0,0,(3)	0,0,(3)	0,0,(3)	0,0,(3)	SRR957843(1;1),SRR957844(2;2),
I	1457556	-	canonical	GATTA(A*)C	A	1457541	-15	expected	4	4	yes	yes	yes	0,1,(3)	0,1,(3)	0,0,(3)	0,0,(3)	SRR957843(3;3),SRR957844(1;1),
I	1506591	-	canonical	TACTA(A*)C	A	1506583	-8	proximal	1	1	yes	no	yes	0,0,(1)	0,0,(1)	0,0,(1)	0,0,(1)	SRR957844(1;1),
I	1512163	-	canonical	CGCTG(A*)T	A	1506898	-5265	distal	1	1	yes	no	yes	0,0,(1)	0,0,(1)	0,0,(1)	0,0,(1)	SRR957844(1;1),
I	1512213	-	canonical	AACTA(A*)C	A	1512198	-15	expected	4	3	yes	yes	yes	0,0,(4)	0,0,(3)	0,0,(4)	0,0,(3)	SRR957843(1;1),SRR957844(3;2),
I	1516675	-	canonical	AGCTA(A*)C	A	1516663	-12	expected	9	8	yes	yes	yes	0,2,(7)	0,2,(6)	0,1,(7)	0,1,(6)	SRR957844(3;3),SRR957843(6;5),
I	1554309	-	canonical	TTCTA(A*)T	A	1554292	-17	expected	159	51	yes	yes	yes	23,7,(129)	13,6,(32)	2,1,(125)	1,1,(29)	SRR957844(97;33),SRR957843(62;18),
I	1593789	-	canonical	AACTA(A*)C	A	1593780	-9	proximal	21	16	yes	yes	yes	3,3,(15)	3,3,(10)	0,0,(15)	0,0,(10)	SRR957844(8;7),SRR957843(13;9),
I	1594192	-	canonical	TATTG(A*)C	A	1594182	-10	proximal	11	9	yes	yes	yes	3,1,(7)	3,1,(5)	0,1,(7)	0,1,(5)	SRR957843(6;6),SRR957844(5;3),
I	1606901	-	canonical	TACTT(A*)T	A	1606803	-98	distal	1	1	yes	no	yes	0,0,(1)	0,0,(1)	0,0,(1)	0,0,(1)	SRR957844(1;1),
I	1619735	-	canonical	TATTA(A*)C	A	1619727	-8	proximal	1	1	yes	no	yes	0,0,(1)	0,0,(1)	0,0,(1)	0,0,(1)	SRR957843(1;1),
I	1645243	-	canonical	TTCTA(A*)C	A	1645231	-12	expected	9	9	yes	yes	yes	0,0,(9)	0,0,(9)	0,0,(8)	0,0,(8)	SRR957844(1;1),SRR957843(8;8),
I	1653615	-	canonical	AACTA(A*)T	A	1653606	-9	proximal	119	54	yes	yes	yes	0,6,(113)	0,5,(49)	0,2,(105)	0,1,(41)	SRR957844(54;21),SRR957843(65;33),
I	1700970	-	canonical	TTCTG(A*)C	A	1700959	-11	expected	58	47	yes	yes	yes	6,5,(47)	5,5,(37)	0,3,(45)	0,3,(35)	SRR957843(34;28),SRR957844(24;19),
I	1706577	-	canonical	TGCTA(A*)T	A	1706568	-9	proximal	47	30	yes	yes	yes	1,2,(44)	1,2,(27)	0,1,(43)	0,1,(26)	SRR957843(20;13),SRR957844(27;17),
I	1710559	-	canonical	TACTA(A*)C	A	1710549	-10	proximal	20	20	yes	yes	yes	3,6,(11)	3,6,(11)	1,1,(11)	1,1,(11)	SRR957843(9;9),SRR957844(11;11),
I	1728741	-	canonical	TACTA(A*)C	A	1728730	-11	expected	5	4	yes	yes	yes	2,0,(3)	2,0,(2)	0,0,(3)	0,0,(2)	SRR957843(3;3),SRR957844(2;1),
I	1743135	-	canonical	TGTTA(A*)C	A	1743124	-11	expected	3	3	yes	yes	yes	0,0,(3)	0,0,(3)	0,0,(2)	0,0,(2)	SRR957844(2;2),SRR957843(1;1),
I	1764803	-	canonical	TACTA(A*)G	A	1764792	-11	expected	2	2	yes	no	yes	0,0,(2)	0,0,(2)	0,0,(1)	0,0,(1)	SRR957844(2;2),
I	1766222	-	canonical	AACTA(A*)C	A	1766188	-34	expected	8	8	yes	yes	yes	1,0,(7)	1,0,(7)	0,0,(6)	0,0,(6)	SRR957843(5;5),SRR957844(3;3),
I	1794778	-	canonical	TATTA(A*)T	A	1794766	-12	expected	1	1	yes	no	yes	0,0,(1)	0,0,(1)	0,0,(1)	0,0,(1)	SRR957843(1;1),
I	1808384	-	canonical	GACTA(A*)T	A	1808376	-8	proximal	2	2	yes	yes	yes	0,0,(2)	0,0,(2)	0,0,(2)	0,0,(2)	SRR957843(1;1),SRR957844(1;1),
I	1808554	-	canonical	TTTTA(A*)C	A	1808538	-16	expected	3	3	yes	yes	yes	0,0,(3)	0,0,(3)	0,0,(3)	0,0,(3)	SRR957844(1;1),SRR957843(2;2),
I	1808972	-	canonical	TGCTA(T*)C	T	1808918	-54	expected	1	1	no	no	yes	0,1,(0)	0,1,(0)	0,0,(0)	0,0,(0)	SRR957843(1;1),
I	1826823	-	canonical	TGCTA(A*)T	A	1826809	-14	expected	2	2	yes	no	yes	0,0,(2)	0,0,(2)	0,0,(2)	0,0,(2)	SRR957843(2;2),
I	1881492	-	canonical	TGTTA(A*)C	A	1881478	-14	expected	73	43	yes	yes	yes	3,7,(63)	3,5,(35)	0,3,(60)	0,3,(32)	SRR957844(31;19),SRR957843(42;24),
I	1920208	-	canonical	TACTA(A*)C	A	1920201	-7	proximal	512	131	yes	yes	yes	33,62,(417)	24,39,(68)	13,9,(392)	11,9,(48)	SRR957844(184;49),SRR957843(326;80),SRR957842(2;2),
I	1936246	-	canonical	TACTA(A*)T	A	1936234	-12	expected	1	1	yes	no	yes	0,0,(1)	0,0,(1)	0,0,(1)	0,0,(1)	SRR957844(1;1),
I	1981968	-	canonical	TATTA(A*)T	A	1981957	-11	expected	3	3	yes	yes	yes	0,0,(3)	0,0,(3)	0,0,(3)	0,0,(3)	SRR957843(2;2),SRR957844(1;1),
I	2028513	-	canonical	CACTA(A*)T	A	2028198	-315	distal	1	1	yes	no	yes	0,0,(1)	0,0,(1)	0,0,(1)	0,0,(1)	SRR957843(1;1),
I	2105059	-	canonical	AGCTA(A*)C	A	2105046	-13	expected	8	8	yes	yes	yes	4,2,(2)	4,2,(2)	0,0,(2)	0,0,(2)	SRR957844(2;2),SRR957843(6;6),
I	2116030	-	canonical	TACTA(A*)C	A	2116017	-13	expected	123	64	yes	yes	yes	11,3,(109)	11,3,(50)	3,1,(107)	3,1,(48)	SRR957844(53;29),SRR957843(70;35),
I	2132438	-	canonical	TACTA(A*)C	A	2132426	-12	expected	1	1	no	no	yes	1,0,(0)	1,0,(0)	0,0,(0)	0,0,(0)	SRR957843(1;1),
I	2156056	-	canonical	TGCTA(A*)T	A	2156048	-8	proximal	24	17	yes	yes	yes	1,0,(23)	1,0,(16)	0,0,(23)	0,0,(16)	SRR957844(13;9),SRR957843(11;8),
I	2178372	-	canonical	TACTA(A*)C	A	2178355	-17	expected	32	24	yes	yes	yes	1,3,(28)	1,3,(20)	0,0,(27)	0,0,(19)	SRR957844(12;8),SRR957843(20;16),
I	2179133	-	canonical	CACTA(A*)C	A	2179117	-16	expected	44	25	yes	yes	yes	3,2,(39)	3,2,(20)	0,1,(39)	0,1,(20)	SRR957844(19;12),SRR957843(25;13),
I	2183972	-	canonical	TACTA(A*)C	A	2183959	-13	expected	1	1	no	no	yes	0,0,(1)	0,0,(1)	0,0,(0)	0,0,(0)	SRR957844(1;1),
I	2193176	-	canonical	TACTA(A*)T	A	2193163	-13	expected	4	4	yes	yes	yes	0,0,(4)	0,0,(4)	0,0,(4)	0,0,(4)	SRR957843(1;1),SRR957844(3;3),
I	2218580	-	canonical	TTCTA(A*)C	A	2218569	-11	expected	11	9	yes	yes	yes	0,0,(11)	0,0,(9)	0,0,(11)	0,0,(9)	SRR957844(4;3),SRR957843(7;6),
I	2238915	-	canonical	AACTA(A*)C	A	2238904	-11	expected	25	20	yes	yes	yes	2,5,(18)	2,5,(13)	1,0,(16)	1,0,(11)	SRR957844(13;9),SRR957843(11;10),SRR957842(1;1),
I	2279005	-	canonical	GACTA(A*)C	A	2278994	-11	expected	4	3	yes	yes	yes	0,0,(4)	0,0,(3)	0,0,(4)	0,0,(3)	SRR957843(1;1),SRR957844(3;2),
I	2284727	-	canonical	TACTA(A*)C	A	2284717	-10	proximal	4	4	yes	yes	yes	2,0,(2)	2,0,(2)	0,0,(2)	0,0,(2)	SRR957843(3;3),SRR957844(1;1),
I	2311582	-	canonical	AACTA(A*)T	A	2311571	-11	expected	34	23	yes	yes	yes	4,3,(27)	2,2,(19)	0,0,(27)	0,0,(19)	SRR957843(15;12),SRR957844(19;11),
I	2348627	-	canonical	CACTA(A*)T	A	2348614	-13	expected	138	48	yes	yes	yes	6,4,(128)	6,4,(38)	0,2,(128)	0,2,(38)	SRR957841(1;1),SRR957843(67;22),SRR957844(70;25),
I	2380035	-	canonical	TCCTA(A*)C	A	2380026	-9	proximal	8	6	yes	yes	yes	0,1,(7)	0,1,(5)	0,0,(7)	0,0,(5)	SRR957843(6;4),SRR957844(2;2),
I	2396625	-	canonical	TACTA(A*)C	A	2396615	-10	proximal	221	59	yes	yes	yes	26,26,(169)	15,16,(28)	4,3,(168)	3,3,(27)	SRR957843(111;29),SRR957844(110;30),
I	2404260	-	canonical	GGCTA(A*)C	A	2404250	-10	proximal	114	62	yes	yes	yes	21,11,(82)	15,9,(38)	8,2,(79)	6,2,(35)	SRR957843(71;36),SRR957844(43;26),
I	2472762	-	canonical	TATTA(A*)C	A	2472749	-13	expected	1	1	no	no	yes	0,1,(0)	0,1,(0)	0,0,(0)	0,0,(0)	SRR957843(1;1),
I	2517818	-	canonical	TTCTT(A*)C	A	2517789	-29	expected	1	1	yes	no	yes	0,0,(1)	0,0,(1)	0,0,(1)	0,0,(1)	SRR957843(1;1),
I	2557859	-	canonical	AACTA(A*)C	A	2557848	-11	expected	27	22	yes	yes	yes	6,7,(14)	6,5,(11)	3,3,(14)	3,2,(11)	SRR957844(15;11),SRR957843(12;11),
I	2560971	-	canonical	GGCTA(A*)T	A	2559214	-1757	distal	2	2	yes	yes	yes	0,0,(2)	0,0,(2)	0,0,(2)	0,0,(2)	SRR957844(1;1),SRR957843(1;1),
I	2621527	-	canonical	TTCTA(A*)C	A	2621519	-8	proximal	9	8	yes	yes	yes	0,1,(8)	0,1,(7)	0,0,(7)	0,0,(6)	SRR957844(5;5),SRR957843(4;3),
I	2672793	-	canonical	AGCTA(A*)C	A	2672783	-10	proximal	7	7	yes	yes	yes	5,1,(1)	5,1,(1)	3,0,(1)	3,0,(1)	SRR957844(3;3),SRR957843(4;4),
I	2675409	-	canonical	AACTA(A*)C	A	2675398	-11	expected	79	42	yes	yes	yes	0,0,(79)	0,0,(42)	0,0,(77)	0,0,(40)	SRR957844(27;18),SRR957843(50;22),SRR957842(2;2),
I	2675617	-	canonical	TGCTA(A*)T	A	2675606	-11	expected	1	1	yes	no	yes	0,0,(1)	0,0,(1)	0,0,(1)	0,0,(1)	SRR957843(1;1),
I	2693116	-	canonical	AGCTA(A*)C	A	2693106	-10	proximal	20	18	yes	yes	yes	4,3,(13)	4,3,(11)	3,1,(13)	3,1,(11)	SRR957843(11;10),SRR957844(9;8),
I	2765718	-	canonical	TACTA(A*)A	A	2765706	-12	expected	8	6	yes	yes	yes	0,4,(4)	0,3,(3)	0,0,(2)	0,0,(2)	SRR957843(4;3),SRR957844(4;3),
I	2785693	-	canonical	CACTA(A*)C	A	2785684	-9	proximal	24	20	yes	yes	yes	3,2,(19)	3,2,(15)	1,0,(15)	1,0,(12)	SRR957844(9;7),SRR957843(15;13),
I	2793263	-	canonical	AACTG(A*)C	A	2793252	-11	expected	66	35	yes	yes	yes	12,0,(54)	9,0,(26)	0,0,(48)	0,0,(20)	SRR957843(33;17),SRR957844(33;18),
I	2851571	-	canonical	TGCTA(A*)T	A	2851557	-14	expected	247	97	yes	yes	yes	15,23,(209)	13,18,(66)	0,2,(190)	0,2,(49)	SRR957844(115;44),SRR957843(130;51),SRR957842(1;1),SRR957841(1;1),
I	2865428	-	canonical	TATTG(A*)C	A	2865409	-19	expected	4	4	yes	yes	yes	0,1,(3)	0,1,(3)	0,0,(3)	0,0,(3)	SRR957843(2;2),SRR957844(2;2),
I	2867400	-	canonical	TATTA(A*)C	A	2867391	-9	proximal	1	1	yes	no	yes	0,0,(1)	0,0,(1)	0,0,(1)	0,0,(1)	SRR957843(1;1),
I	2869189	-	canonical	TATTA(A*)C	A	2869171	-18	expected	1	1	yes	no	yes	0,0,(1)	0,0,(1)	0,0,(1)	0,0,(1)	SRR957843(1;1),
I	2892186	-	canonical	TACTA(A*)T	A	2892175	-11	expected	244	69	yes	yes	yes	6,18,(220)	6,14,(49)	0,6,(217)	0,5,(47)	SRR957844(111;28),SRR957843(133;41),
I	3008806	-	canonical	TGCTA(A*)C	A	3008795	-11	expected	2	2	yes	yes	yes	1,0,(1)	1,0,(1)	0,0,(1)	0,0,(1)	SRR957844(1;1),SRR957843(1;1),
I	3018082	-	canonical	TACTA(A*)C	A	3018073	-9	proximal	16	12	yes	yes	yes	0,3,(13)	0,3,(9)	0,1,(13)	0,1,(9)	SRR957843(12;9),SRR957844(4;3),
I	3020020	-	canonical	GGCTA(A*)C	A	3020010	-10	proximal	691	186	yes	yes	yes	100,46,(545)	57,29,(100)	80,8,(531)	41,7,(90)	SRR957843(403;101),SRR957842(1;1),SRR957844(287;84),
I	3040007	-	canonical	TACTA(A*)C	A	3039995	-12	expected	18	9	yes	yes	yes	1,0,(17)	1,0,(8)	0,0,(17)	0,0,(8)	SRR957844(14;5),SRR957843(4;4),
I	3042835	-	canonical	TACTA(A*)C	A	3042817	-18	expected	1	1	yes	no	yes	0,0,(1)	0,0,(1)	0,0,(1)	0,0,(1)	SRR957844(1;1),
I	3050760	-	canonical	TACTA(A*)C	A	3050745	-15	expected	241	78	yes	yes	yes	10,19,(212)	8,18,(52)	2,3,(208)	1,3,(48)	SRR957843(128;46),SRR957844(113;32),
I	3090056	-	canonical	TTCTA(A*)C	A	3090047	-9	proximal	12	11	yes	yes	yes	2,4,(6)	2,4,(5)	0,1,(5)	0,1,(4)	SRR957843(8;8),SRR957844(4;3),
I	3090299	-	canonical	GACTA(A*)C	A	3090285	-14	expected	9	9	yes	yes	yes	0,0,(9)	0,0,(9)	0,0,(9)	0,0,(9)	SRR957844(6;6),SRR957843(3;3),
I	3102163	-	canonical	TATTA(A*)C	A	3102149	-14	expected	4	4	yes	yes	yes	0,0,(4)	0,0,(4)	0,0,(4)	0,0,(4)	SRR957843(2;2),SRR957844(2;2),
I	3103581	-	canonical	TTCTG(A*)C	A	3103565	-16	expected	13	13	yes	yes	yes	4,0,(9)	4,0,(9)	0,0,(9)	0,0,(9)	SRR957844(6;6),SRR957843(7;7),
I	3114013	-	canonical	TACTA(A*)T	A	3113999	-14	expected	2	2	yes	no	yes	0,0,(2)	0,0,(2)	0,0,(2)	0,0,(2)	SRR957843(2;2),
I	3172866	-	canonical	TTCTA(A*)C	A	3172857	-9	proximal	37	32	yes	yes	yes	1,4,(32)	1,4,(27)	1,2,(31)	1,2,(26)	SRR957844(20;16),SRR957843(17;16),
I	3179717	-	canonical	TACTG(A*)C	A	3179709	-8	proximal	15	12	yes	yes	yes	6,0,(9)	4,0,(8)	0,0,(9)	0,0,(8)	SRR957843(10;7),SRR957844(5;5),
I	3187731	-	canonical	TGCTA(A*)C	A	3187722	-9	proximal	14	13	yes	yes	yes	3,0,(11)	3,0,(10)	0,0,(11)	0,0,(10)	SRR957843(6;6),SRR957844(8;7),
I	3187957	-	canonical	TTCTA(A*)C	A	3187941	-16	expected	30	21	yes	yes	yes	1,2,(27)	1,2,(18)	0,1,(25)	0,1,(16)	SRR957843(17;12),SRR957844(13;9),
I	3221628	-	canonical	TATTA(A*)C	A	3221620	-8	proximal	23	17	yes	yes	yes	0,2,(21)	0,2,(15)	0,0,(20)	0,0,(14)	SRR957843(16;11),SRR957844(7;6),
I	3241579	-	canonical	TACTA(A*)T	A	3241570	-9	proximal	1	1	no	no	yes	1,0,(0)	1,0,(0)	0,0,(0)	0,0,(0)	SRR957843(1;1),
I	3241768	-	canonical	TATTA(A*)C	A	3241753	-15	expected	10	10	yes	yes	yes	0,2,(8)	0,2,(8)	0,1,(7)	0,1,(7)	SRR957844(4;4),SRR957843(6;6),
I	3259070	-	canonical	TACTG(A*)T	A	3259053	-17	expected	144	61	yes	yes	yes	93,6,(45)	30,6,(25)	1,2,(37)	1,2,(20)	SRR957841(1;1),SRR957843(78;31),SRR957844(65;29),
I	3279547	-	canonical	TGCTA(A*)C	A	3279539	-8	proximal	4	4	yes	yes	yes	1,0,(3)	1,0,(3)	1,0,(3)	1,0,(3)	SRR957844(1;1),SRR957843(3;3),
I	3366888	-	canonical	TTTTA(A*)C	A	3366872	-16	expected	4	3	yes	yes	yes	1,0,(3)	1,0,(2)	1,0,(3)	1,0,(2)	SRR957844(1;1),SRR957843(3;2),
I	3369461	-	canonical	TGCTA(A*)C	A	3369449	-12	expected	1	1	no	no	yes	0,0,(1)	0,0,(1)	0,0,(0)	0,0,(0)	SRR957844(1;1),
I	3393039	-	canonical	TGCTG(A*)C	A	3393028	-11	expected	14	13	yes	yes	yes	6,0,(8)	6,0,(7)	0,0,(8)	0,0,(7)	SRR957844(8;7),SRR957843(6;6),
I	3409278	-	canonical	TGTTA(A*)C	A	3409267	-11	expected	16	14	yes	yes	yes	0,1,(15)	0,1,(13)	0,0,(14)	0,0,(12)	SRR957843(7;7),SRR957844(9;7),
I	3430354	-	canonical	TACTA(A*)T	A	3430343	-11	expected	11	10	no	yes	yes	7,2,(2)	6,2,(2)	0,0,(0)	0,0,(0)	SRR957844(4;4),SRR957843(7;6),
I	3442058	-	canonical	TGTTA(A*)T	A	3442048	-10	proximal	1	1	no	no	yes	1,0,(0)	1,0,(0)	0,0,(0)	0,0,(0)	SRR957843(1;1),
I	3452279	-	canonical	TACTA(A*)C	A	3452269	-10	proximal	18	15	yes	yes	yes	1,3,(14)	1,2,(12)	0,2,(14)	0,1,(12)	SRR957844(7;6),SRR957843(11;9),
I	3460572	-	canonical	TTCTA(A*)C	A	3460560	-12	expected	11	9	yes	yes	yes	3,2,(6)	2,2,(5)	3,0,(4)	2,0,(4)	SRR957844(3;3),SRR957843(8;6),
I	3461613	-	canonical	TGCTA(A*)C	A	3461583	-30	expected	22	19	yes	yes	yes	12,2,(8)	10,1,(8)	1,0,(8)	1,0,(8)	SRR957843(13;11),SRR957844(9;8),
I	3465458	-	canonical	AACTA(A*)C	A	3465444	-14	expected	16	9	yes	yes	yes	0,1,(15)	0,1,(8)	0,1,(14)	0,1,(7)	SRR957844(7;4),SRR957843(9;5),
I	3466019	-	canonical	TGCTG(A*)C	A	3466006	-13	expected	15	13	yes	yes	yes	12,0,(3)	10,0,(3)	0,0,(3)	0,0,(3)	SRR957844(3;3),SRR957843(12;10),
I	3469854	-	canonical	CACTA(A*)C	A	3469845	-9	proximal	5	5	yes	yes	yes	1,0,(4)	1,0,(4)	0,0,(3)	0,0,(3)	SRR957843(1;1),SRR957844(4;4),
I	3474644	-	canonical	TGCTA(A*)T	A	3474631	-13	expected	116	44	yes	yes	yes	12,10,(94)	8,6,(30)	0,1,(94)	0,1,(30)	SRR957843(59;23),SRR957842(1;1),SRR957844(56;20),
I	3493284	-	canonical	CGCTA(A*)C	A	3493274	-10	proximal	2	2	yes	yes	yes	1,0,(1)	1,0,(1)	0,0,(1)	0,0,(1)	SRR957843(2;2),
I	3494085	-	canonical	TACTA(A*)C	A	3494071	-14	expected	2	2	yes	yes	yes	1,0,(1)	1,0,(1)	1,0,(0)	1,0,(0)	SRR957844(1;1),SRR957843(1;1),
I	3497012	-	canonical	TGTTA(T*)T	T	3496988	-24	expected	1	1	yes	no	yes	1,0,(0)	1,0,(0)	1,0,(0)	1,0,(0)	SRR957844(1;1),
I	3509811	-	canonical	TTTTA(A*)C	A	3508050	-1761	distal	1	1	no	no	yes	0,0,(1)	0,0,(1)	0,0,(0)	0,0,(0)	SRR957843(1;1),
I	3519150	-	canonical	TGCTA(A*)T	A	3519139	-11	expected	24	21	yes	yes	yes	2,1,(21)	2,1,(18)	1,0,(20)	1,0,(17)	SRR957843(10;9),SRR957844(14;12),
I	3523478	-	canonical	TACTC(A*)T	A	3522287	-1191	distal	1	1	yes	no	yes	0,0,(1)	0,0,(1)	0,0,(1)	0,0,(1)	SRR957843(1;1),
I	3523653	-	canonical	GATTA(A*)C	A	3523644	-9	proximal	41	25	yes	yes	yes	0,4,(37)	0,3,(22)	0,2,(32)	0,2,(18)	SRR957844(11;10),SRR957843(30;15),
I	3527502	-	canonical	TTTTA(A*)C	A	3527493	-9	proximal	36	23	yes	yes	yes	0,1,(35)	0,1,(22)	0,0,(35)	0,0,(22)	SRR957843(18;12),SRR957844(18;11),
I	3527512	-	canonical	TCTTA(A*)C	A	3527493	-19	expected	2	2	yes	no	yes	0,0,(2)	0,0,(2)	0,0,(2)	0,0,(2)	SRR957843(2;2),
I	3534747	-	canonical	TACTA(A*)T	A	3534738	-9	proximal	4	3	yes	yes	yes	0,0,(4)	0,0,(3)	0,0,(4)	0,0,(3)	SRR957843(2;2),SRR957844(2;1),
I	3546932	-	canonical	GACTG(A*)C	A	3546914	-18	expected	2	2	no	yes	yes	1,0,(1)	1,0,(1)	0,0,(0)	0,0,(0)	SRR957844(2;2),
I	3547165	-	canonical	AGCTT(A*)C	A	3547152	-13	expected	2	2	yes	yes	yes	0,0,(2)	0,0,(2)	0,0,(2)	0,0,(2)	SRR957844(1;1),SRR957843(1;1),
I	3567650	-	canonical	TATTA(A*)C	A	3567638	-12	expected	9	8	yes	yes	yes	0,0,(9)	0,0,(8)	0,0,(8)	0,0,(7)	SRR957844(4;3),SRR957843(5;5),
I	3569378	-	canonical	TACTA(A*)C	A	3569368	-10	proximal	7	7	yes	yes	yes	1,0,(6)	1,0,(6)	0,0,(5)	0,0,(5)	SRR957843(1;1),SRR957844(6;6),
I	3584009	-	canonical	TGCTA(A*)C	A	3583995	-14	expected	40	33	yes	yes	yes	9,7,(24)	6,6,(21)	1,0,(24)	1,0,(21)	SRR957844(22;16),SRR957843(18;17),
I	3619714	-	canonical	TACTA(A*)T	A	3619703	-11	expected	1	1	yes	no	yes	0,0,(1)	0,0,(1)	0,0,(1)	0,0,(1)	SRR957844(1;1),
I	3620266	-	canonical	TATTA(A*)C	A	3620257	-9	proximal	1	1	yes	no	yes	0,0,(1)	0,0,(1)	0,0,(1)	0,0,(1)	SRR957844(1;1),
I	3623185	-	canonical	TTCTA(A*)C	A	3623175	-10	proximal	4	4	yes	yes	yes	1,0,(3)	1,0,(3)	0,0,(3)	0,0,(3)	SRR957843(3;3),SRR957844(1;1),
I	3639275	-	canonical	AACTA(A*)C	A	3639264	-11	expected	6	4	yes	yes	yes	0,2,(4)	0,1,(3)	0,0,(4)	0,0,(3)	SRR957843(6;4),
I	3686609	-	canonical	AGCTA(A*)C	A	3686600	-9	proximal	17	12	yes	yes	yes	5,2,(10)	4,2,(6)	2,0,(10)	2,0,(6)	SRR957843(8;5),SRR957844(9;7),
I	3709359	-	canonical	TTCTA(A*)C	A	3709346	-13	expected	93	62	yes	yes	yes	9,11,(73)	8,11,(43)	4,5,(72)	4,5,(42)	SRR957844(39;26),SRR957843(54;36),
I	3727157	-	canonical	AACTA(A*)T	A	3727142	-15	expected	2	2	no	yes	yes	1,1,(0)	1,1,(0)	0,0,(0)	0,0,(0)	SRR957843(1;1),SRR957844(1;1),
I	3735288	-	canonical	TACTA(A*)C	A	3735276	-12	expected	64	52	yes	yes	yes	8,8,(48)	8,8,(36)	8,0,(43)	8,0,(32)	SRR957844(21;20),SRR957843(42;31),SRR957841(1;1),
I	3821046	-	canonical	AACTA(A*)C	A	3821033	-13	expected	60	39	yes	yes	yes	7,4,(49)	6,4,(29)	1,0,(46)	1,0,(26)	SRR957843(44;26),SRR957844(16;13),
I	3839167	-	canonical	TACTA(A*)C	A	3839157	-10	proximal	124	61	yes	yes	yes	5,16,(103)	5,11,(45)	4,5,(99)	4,4,(41)	SRR957843(74;37),SRR957844(50;24),
I	3896876	-	canonical	TACTA(A*)C	A	3896863	-13	expected	3	2	yes	yes	yes	0,1,(2)	0,1,(1)	0,1,(2)	0,1,(1)	SRR957844(3;2),
I	3909746	-	canonical	TGCTA(A*)C	A	3909734	-12	expected	38	24	yes	yes	yes	28,3,(7)	14,3,(7)	1,0,(7)	1,0,(7)	SRR957844(19;12),SRR957843(19;12),
I	3915131	-	canonical	TGCTG(A*)T	A	3915124	-7	proximal	2	2	yes	yes	yes	1,0,(1)	1,0,(1)	0,0,(1)	0,0,(1)	SRR957843(1;1),SRR957844(1;1),
I	3915830	-	canonical	TACTA(A*)T	A	3915821	-9	proximal	2	1	yes	no	yes	0,0,(2)	0,0,(1)	0,0,(2)	0,0,(1)	SRR957843(2;1),
I	3927897	-	canonical	TACTA(A*)C	A	3927884	-13	expected	5	5	yes	yes	yes	0,2,(3)	0,2,(3)	0,0,(3)	0,0,(3)	SRR957843(2;2),SRR957844(3;3),
I	3942378	-	canonical	AGCTA(A*)C	A	3942364	-14	expected	3	3	yes	yes	yes	1,1,(1)	1,1,(1)	1,0,(1)	1,0,(1)	SRR957844(3;3),
I	3942684	-	canonical	TTCTA(A*)C	A	3942669	-15	expected	196	109	yes	yes	yes	32,21,(143)	20,18,(71)	17,5,(130)	11,5,(60)	SRR957844(73;38),SRR957843(123;71),
I	3980208	-	canonical	TACTA(A*)C	A	3980195	-13	expected	11	9	yes	yes	yes	2,4,(5)	2,3,(4)	0,1,(5)	0,1,(4)	SRR957843(5;5),SRR957844(6;4),
I	4007163	-	canonical	TGCTA(A*)C	A	4007148	-15	expected	99	43	yes	yes	yes	15,4,(80)	11,3,(29)	6,0,(80)	4,0,(29)	SRR957844(49;18),SRR957843(50;25),
I	4034964	-	canonical	AGCTA(A*)C	A	4034949	-15	expected	2	2	yes	yes	yes	1,0,(1)	1,0,(1)	0,0,(1)	0,0,(1)	SRR957843(1;1),SRR957844(1;1),
I	4034983	-	canonical	CGTTA(A*)T	A	4034949	-34	expected	1	1	yes	no	yes	0,0,(1)	0,0,(1)	0,0,(1)	0,0,(1)	SRR957843(1;1),
I	4035550	-	canonical	TGTTA(A*)C	A	4035543	-7	proximal	1	1	yes	no	yes	0,0,(1)	0,0,(1)	0,0,(1)	0,0,(1)	SRR957844(1;1),
I	4043667	-	canonical	TACTA(A*)C	A	4043657	-10	proximal	35	25	yes	yes	yes	2,4,(29)	1,4,(20)	0,1,(27)	0,1,(18)	SRR957843(20;15),SRR957844(15;10),
I	4046980	-	canonical	GACTA(A*)C	A	4046970	-10	proximal	4	3	yes	yes	yes	0,0,(4)	0,0,(3)	0,0,(4)	0,0,(3)	SRR957843(1;1),SRR957844(3;2),
I	4046987	-	canonical	TATTA(A*)T	A	4046970	-17	expected	1	1	yes	no	yes	0,0,(1)	0,0,(1)	0,0,(1)	0,0,(1)	SRR957843(1;1),
I	4055884	-	canonical	TACTA(A*)C	A	4055872	-12	expected	8	8	yes	yes	yes	1,2,(5)	1,2,(5)	1,2,(5)	1,2,(5)	SRR957843(5;5),SRR957844(3;3),
I	4066504	-	canonical	GACTG(A*)C	A	4066491	-13	expected	42	29	yes	yes	yes	21,3,(18)	15,2,(12)	0,2,(16)	0,1,(10)	SRR957843(33;22),SRR957844(9;7),
I	4066663	-	canonical	TGTTA(A*)C	A	4066652	-11	expected	2	1	yes	no	yes	0,0,(2)	0,0,(1)	0,0,(2)	0,0,(1)	SRR957844(2;1),
I	4066875	-	canonical	CGCTA(A*)C	A	4066858	-17	expected	2	2	no	no	yes	0,2,(0)	0,2,(0)	0,0,(0)	0,0,(0)	SRR957844(2;2),
I	4070196	-	canonical	TGCTA(A*)C	A	4070172	-24	expected	4	4	yes	yes	yes	1,0,(3)	1,0,(3)	0,0,(2)	0,0,(2)	SRR957844(1;1),SRR957843(3;3),
I	4113947	-	canonical	TACTA(A*)C	A	4113933	-14	expected	2	2	yes	yes	yes	0,1,(1)	0,1,(1)	0,1,(1)	0,1,(1)	SRR957843(2;2),
I	4132935	-	canonical	TACTA(A*)C	A	4132923	-12	expected	11	9	yes	yes	yes	1,5,(5)	1,4,(4)	0,1,(5)	0,1,(4)	SRR957843(6;5),SRR957844(5;4),
I	4133320	-	canonical	CGCTA(A*)C	A	4133299	-21	expected	37	24	yes	yes	yes	0,7,(30)	0,7,(17)	0,2,(29)	0,2,(16)	SRR957843(19;14),SRR957844(18;10),
I	4138732	-	canonical	TACTA(A*)C	A	4138718	-14	expected	42	34	yes	yes	yes	6,2,(34)	5,2,(27)	3,1,(34)	2,1,(27)	SRR957844(20;15),SRR957843(22;19),
I	4152353	-	canonical	TACTA(A*)T	A	4152345	-8	proximal	32	26	yes	yes	yes	1,4,(27)	1,4,(21)	0,1,(25)	0,1,(19)	SRR957844(15;14),SRR957843(17;12),
I	4207730	-	canonical	TACTA(A*)T	A	4207714	-16	expected	23	16	yes	yes	yes	1,2,(20)	1,2,(13)	0,1,(19)	0,1,(12)	SRR957844(11;8),SRR957843(12;8),
I	4247634	-	canonical	TTCTA(A*)C	A	4247614	-20	expected	3	3	yes	yes	yes	0,1,(2)	0,1,(2)	0,1,(2)	0,1,(2)	SRR957844(2;2),SRR957843(1;1),
I	4257142	-	canonical	CGCTA(A*)C	A	4257132	-10	proximal	4	3	yes	yes	yes	0,1,(3)	0,1,(2)	0,1,(3)	0,1,(2)	SRR957843(3;2),SRR957844(1;1),
I	4305582	-	canonical	TACTG(A*)C	A	4305569	-13	expected	34	25	yes	yes	yes	20,1,(13)	13,1,(11)	0,0,(11)	0,0,(10)	SRR957843(22;16),SRR957844(12;9),
I	4305625	-	canonical	GATTA(A*)T	A	4305569	-56	expected	3	3	no	yes	yes	0,3,(0)	0,3,(0)	0,0,(0)	0,0,(0)	SRR957843(2;2),SRR957844(1;1),
I	4409105	-	canonical	GACTA(A*)C	A	4409096	-9	proximal	1	1	no	no	yes	0,1,(0)	0,1,(0)	0,0,(0)	0,0,(0)	SRR957842(1;1),
I	4426122	-	canonical	TGTTA(A*)C	A	4426110	-12	expected	7	5	yes	yes	yes	0,0,(7)	0,0,(5)	0,0,(7)	0,0,(5)	SRR957843(6;4),SRR957844(1;1),
I	4426276	-	canonical	TACTA(A*)C	A	4426268	-8	proximal	42	33	yes	yes	yes	6,5,(31)	4,5,(24)	0,1,(31)	0,1,(24)	SRR957843(27;21),SRR957844(15;12),
I	4468779	-	canonical	TACTA(A*)C	A	4468768	-11	expected	276	111	yes	yes	yes	26,18,(232)	18,18,(75)	5,6,(229)	4,6,(72)	SRR957844(126;44),SRR957843(150;67),
I	4476484	-	canonical	AACTA(A*)C	A	4476474	-10	proximal	36	23	yes	yes	yes	2,3,(31)	2,2,(19)	0,0,(30)	0,0,(18)	SRR957843(27;16),SRR957844(9;7),
I	4485607	-	canonical	TATTA(A*)T	A	4485596	-11	expected	7	7	yes	yes	yes	0,4,(3)	0,4,(3)	0,0,(1)	0,0,(1)	SRR957844(1;1),SRR957843(6;6),
I	4548481	-	canonical	TGCTA(A*)T	A	4548474	-7	proximal	4	3	yes	yes	yes	0,0,(4)	0,0,(3)	0,0,(4)	0,0,(3)	SRR957843(2;2),SRR957844(2;1),
I	4705234	-	canonical	TACTA(A*)C	A	4705224	-10	proximal	23	15	yes	yes	yes	4,1,(18)	4,1,(10)	1,0,(17)	1,0,(9)	SRR957843(13;9),SRR957844(10;6),
I	4733339	-	canonical	TACTG(A*)C	A	4733328	-11	expected	67	40	yes	yes	yes	34,0,(33)	18,0,(22)	0,0,(33)	0,0,(22)	SRR957842(1;1),SRR957843(35;21),SRR957844(31;18),
I	4733607	-	canonical	AACTA(A*)T	A	4733599	-8	proximal	5	3	yes	yes	yes	0,0,(5)	0,0,(3)	0,0,(5)	0,0,(3)	SRR957843(1;1),SRR957844(4;2),
I	4751743	-	canonical	TACTG(A*)C	A	4751734	-9	proximal	1	1	no	no	yes	1,0,(0)	1,0,(0)	0,0,(0)	0,0,(0)	SRR957844(1;1),
I	4752043	-	canonical	AGCTA(A*)T	A	4752034	-9	proximal	1	1	no	no	yes	1,0,(0)	1,0,(0)	0,0,(0)	0,0,(0)	SRR957842(1;1),
I	4752238	-	canonical	CACTA(A*)C	A	4752224	-14	expected	1	1	no	no	yes	0,1,(0)	0,1,(0)	0,0,(0)	0,0,(0)	SRR957842(1;1),
I	4778160	-	canonical	TTCTA(A*)C	A	4778147	-13	expected	3	3	yes	yes	yes	0,1,(2)	0,1,(2)	0,0,(2)	0,0,(2)	SRR957843(3;3),
I	4779677	-	canonical	TGCTA(A*)T	A	4779667	-10	proximal	20	15	yes	yes	yes	3,3,(14)	2,3,(10)	2,0,(12)	1,0,(8)	SRR957843(11;9),SRR957844(9;6),
I	4798113	-	canonical	TACTA(A*)T	A	4798103	-10	proximal	1	1	yes	no	yes	0,0,(1)	0,0,(1)	0,0,(1)	0,0,(1)	SRR957843(1;1),
I	4835736	-	canonical	TATTT(A*)T	A	4835703	-33	expected	2	1	no	no	yes	0,0,(2)	0,0,(1)	0,0,(0)	0,0,(0)	SRR957843(2;1),
I	4842901	-	canonical	AATTA(A*)C	A	4842891	-10	proximal	16	14	yes	yes	yes	0,4,(12)	0,3,(11)	0,1,(12)	0,1,(11)	SRR957843(10;8),SRR957844(6;6),
I	4843244	-	canonical	TATTA(A*)C	A	4843231	-13	expected	3	3	yes	yes	yes	0,0,(3)	0,0,(3)	0,0,(3)	0,0,(3)	SRR957843(1;1),SRR957844(2;2),
I	4859830	-	canonical	TACTA(A*)C	A	4859813	-17	expected	7	6	yes	yes	yes	0,0,(7)	0,0,(6)	0,0,(6)	0,0,(5)	SRR957843(6;5),SRR957844(1;1),
I	4872586	-	canonical	TACTA(A*)T	A	4872572	-14	expected	35	24	yes	yes	yes	1,0,(34)	1,0,(23)	0,0,(31)	0,0,(21)	SRR957843(15;10),SRR957844(20;14),
I	4894523	-	canonical	TGCTA(A*)T	A	4894514	-9	proximal	12	9	yes	yes	yes	4,1,(7)	3,1,(5)	0,0,(6)	0,0,(4)	SRR957843(8;5),SRR957844(4;4),
I	4927610	-	canonical	TGCTA(A*)C	A	4927598	-12	expected	4	3	yes	yes	yes	0,1,(3)	0,1,(2)	0,0,(2)	0,0,(1)	SRR957844(4;3),
I	4950890	-	canonical	TGCTA(A*)T	A	4950882	-8	proximal	22	15	yes	yes	yes	1,4,(17)	1,3,(11)	0,0,(17)	0,0,(11)	SRR957843(14;9),SRR957844(8;6),
I	4972672	-	canonical	TGCTA(A*)C	A	4972662	-10	proximal	35	26	yes	yes	yes	4,7,(24)	4,3,(19)	2,0,(24)	2,0,(19)	SRR957843(15;11),SRR957844(20;15),
I	4972942	-	canonical	TGTTA(A*)C	A	4972922	-20	expected	15	13	yes	yes	yes	0,0,(15)	0,0,(13)	0,0,(15)	0,0,(13)	SRR957844(11;9),SRR957843(4;4),
I	4973044	-	canonical	TGCTA(A*)T	A	4973030	-14	expected	29	25	yes	yes	yes	1,5,(23)	1,5,(19)	0,0,(19)	0,0,(15)	SRR957844(11;9),SRR957843(18;16),
I	4985923	-	canonical	AGCTA(A*)C	A	4985906	-17	expected	7	6	yes	yes	yes	0,0,(7)	0,0,(6)	0,0,(6)	0,0,(5)	SRR957844(6;5),SRR957843(1;1),
I	4993946	-	canonical	TATTA(A*)C	A	4993934	-12	expected	22	20	yes	yes	yes	0,4,(18)	0,4,(16)	0,0,(15)	0,0,(13)	SRR957843(13;12),SRR957844(9;8),
I	4996776	-	canonical	CGTTA(A*)C	A	4996763	-13	expected	1	1	no	no	yes	0,0,(1)	0,0,(1)	0,0,(0)	0,0,(0)	SRR957844(1;1),
I	5017067	-	canonical	TGCTA(A*)C	A	5017059	-8	proximal	24	19	yes	yes	yes	16,2,(6)	13,1,(5)	3,0,(6)	3,0,(5)	SRR957843(15;12),SRR957844(9;7),
I	5017259	-	canonical	TACTA(A*)T	A	5017252	-7	proximal	439	112	yes	yes	yes	24,41,(374)	20,29,(63)	7,7,(342)	6,7,(46)	SRR957841(1;1),SRR957843(250;57),SRR957842(3;3),SRR957844(185;51),
I	5017545	-	canonical	TACAT(A*)C	A	5017433	-112	distal	1	1	no	no	yes	0,0,(1)	0,0,(1)	0,0,(0)	0,0,(0)	SRR957844(1;1),
I	5017713	-	canonical	TATTA(A*)C	A	5017703	-10	proximal	8	4	yes	yes	yes	0,3,(5)	0,1,(3)	0,0,(5)	0,0,(3)	SRR957844(8;4),
I	5023191	-	canonical	TGCTA(A*)C	A	5023175	-16	expected	1	1	yes	no	yes	1,0,(0)	1,0,(0)	1,0,(0)	1,0,(0)	SRR957843(1;1),
I	5044244	-	canonical	TACTA(A*)C	A	5044231	-13	expected	58	40	yes	yes	yes	4,11,(43)	4,8,(28)	2,0,(41)	2,0,(26)	SRR957844(20;16),SRR957843(38;24),
I	5054386	-	canonical	TGCTT(A*)C	A	5054373	-13	expected	5	2	yes	no	yes	0,0,(5)	0,0,(2)	0,0,(5)	0,0,(2)	SRR957844(5;2),
I	5073196	-	canonical	AACTA(A*)C	A	5073188	-8	proximal	23	19	yes	yes	yes	3,1,(19)	3,1,(15)	0,0,(17)	0,0,(13)	SRR957844(9;6),SRR957843(14;13),
I	5095312	-	canonical	TACTA(A*)C	A	5095301	-11	expected	67	33	yes	yes	yes	4,7,(56)	4,4,(25)	0,0,(52)	0,0,(23)	SRR957843(42;23),SRR957844(25;10),
I	5098414	-	canonical	TTCTA(A*)C	A	5098405	-9	proximal	10	10	yes	yes	yes	2,2,(6)	2,2,(6)	1,1,(4)	1,1,(4)	SRR957844(4;4),SRR957843(6;6),
I	5276767	-	canonical	TATTA(A*)T	A	5276755	-12	expected	12	11	yes	yes	yes	0,0,(12)	0,0,(11)	0,0,(7)	0,0,(7)	SRR957843(6;5),SRR957844(6;6),
I	5287708	-	canonical	TTTTA(A*)C	A	5287698	-10	proximal	8	6	yes	yes	yes	0,0,(8)	0,0,(6)	0,0,(7)	0,0,(5)	SRR957843(5;4),SRR957844(3;2),
I	5353333	-	canonical	GACTA(A*)C	A	5350780	-2553	distal	1	1	yes	no	yes	0,0,(1)	0,0,(1)	0,0,(1)	0,0,(1)	SRR957844(1;1),
I	5361343	-	canonical	GGCTA(A*)T	A	5361331	-12	expected	1	1	yes	no	yes	0,0,(1)	0,0,(1)	0,0,(1)	0,0,(1)	SRR957844(1;1),
I	5369566	-	canonical	TACTA(A*)C	A	5369559	-7	proximal	11	9	yes	yes	yes	0,1,(10)	0,1,(8)	0,0,(10)	0,0,(8)	SRR957843(7;6),SRR957844(4;3),
I	5369792	-	canonical	TGCTA(A*)C	A	5369782	-10	proximal	195	85	yes	yes	yes	19,17,(159)	15,14,(56)	3,2,(146)	3,1,(46)	SRR957844(81;33),SRR957843(114;52),
I	5373344	-	canonical	AACTA(A*)C	A	5373331	-13	expected	7	6	yes	yes	yes	0,3,(4)	0,3,(3)	0,0,(3)	0,0,(2)	SRR957843(5;4),SRR957844(2;2),
I	5384093	-	canonical	TGCTG(A*)C	A	5384083	-10	proximal	26	23	yes	yes	yes	8,1,(17)	8,1,(14)	0,0,(16)	0,0,(13)	SRR957844(5;4),SRR957843(21;19),
I	5390722	-	canonical	TGCTA(A*)T	A	5390707	-15	expected	50	26	yes	yes	yes	3,0,(47)	3,0,(23)	0,0,(45)	0,0,(21)	SRR957844(16;11),SRR957843(34;15),
I	290172	+	canonical	TACTA(A*)C	A	290186	-14	expected	105	70	yes	yes	yes	16,7,(82)	15,7,(48)	5,2,(82)	5,2,(48)	SRR957841(2;1),SRR957844(52;34),SRR957842(1;1),SRR957843(50;34),
I	303326	+	canonical	TACTA(A*)A	A	303333	-7	proximal	1	1	no	no	yes	0,1,(0)	0,1,(0)	0,0,(0)	0,0,(0)	SRR957844(1;1),
I	304662	+	canonical	TGCTA(A*)C	A	304673	-11	expected	8	7	yes	yes	yes	4,0,(4)	4,0,(3)	1,0,(4)	1,0,(3)	SRR957844(5;4),SRR957843(3;3),
I	306077	+	canonical	GACTA(A*)C	A	306089	-12	expected	49	31	yes	yes	yes	0,1,(48)	0,1,(30)	0,1,(46)	0,1,(28)	SRR957843(30;18),SRR957844(19;13),
I	306301	+	canonical	TACTT(A*)C	A	306315	-14	expected	18	15	yes	yes	yes	0,1,(17)	0,1,(14)	0,0,(14)	0,0,(12)	SRR957843(10;9),SRR957844(8;6),
I	326929	+	canonical	TGCTT(A*)C	A	326941	-12	expected	1	1	yes	no	yes	0,0,(1)	0,0,(1)	0,0,(1)	0,0,(1)	SRR957844(1;1),
I	351280	+	canonical	TACTA(A*)C	A	351294	-14	expected	5	3	yes	yes	yes	1,2,(2)	1,1,(1)	0,0,(2)	0,0,(1)	SRR957843(3;2),SRR957844(2;1),
I	367097	+	canonical	TACTA(A*)T	A	367104	-7	proximal	1	1	yes	no	yes	0,0,(1)	0,0,(1)	0,0,(1)	0,0,(1)	SRR957844(1;1),
I	367280	+	canonical	TACTA(A*)C	A	367292	-12	expected	85	47	yes	yes	yes	1,12,(72)	1,8,(38)	0,2,(67)	0,1,(34)	SRR957843(49;26),SRR957844(36;21),
I	384973	+	canonical	AACTA(A*)T	A	384985	-12	expected	3	3	yes	yes	yes	0,0,(3)	0,0,(3)	0,0,(3)	0,0,(3)	SRR957843(1;1),SRR957844(2;2),
I	386775	+	canonical	TACTA(A*)C	A	386785	-10	proximal	12	9	yes	yes	yes	1,0,(11)	1,0,(8)	1,0,(11)	1,0,(8)	SRR957844(7;5),SRR957843(5;4),
I	406119	+	canonical	CACTA(A*)C	A	406133	-14	expected	43	26	yes	yes	yes	5,2,(36)	4,2,(20)	2,0,(35)	2,0,(19)	SRR957844(18;14),SRR957843(25;12),
I	406257	+	canonical	AACTA(A*)C	A	406267	-10	proximal	1	1	yes	no	yes	1,0,(0)	1,0,(0)	1,0,(0)	1,0,(0)	SRR957843(1;1),
I	406336	+	canonical	TATTG(A*)T	A	406502	-166	distal	1	1	yes	no	yes	0,0,(1)	0,0,(1)	0,0,(1)	0,0,(1)	SRR957844(1;1),
I	415752	+	canonical	TTCTA(A*)C	A	415762	-10	proximal	12	9	yes	yes	yes	0,3,(9)	0,2,(7)	0,0,(9)	0,0,(7)	SRR957844(2;2),SRR957843(10;7),
I	494658	+	canonical	TTCTA(A*)C	A	494666	-8	proximal	1	1	no	no	yes	1,0,(0)	1,0,(0)	0,0,(0)	0,0,(0)	SRR957843(1;1),
I	520785	+	canonical	TGCTA(A*)T	A	520799	-14	expected	1	1	yes	no	yes	0,1,(0)	0,1,(0)	0,1,(0)	0,1,(0)	SRR957844(1;1),
I	570876	+	canonical	TTCTA(A*)C	A	570884	-8	proximal	5	4	yes	yes	yes	0,0,(5)	0,0,(4)	0,0,(5)	0,0,(4)	SRR957844(2;1),SRR957843(3;3),
I	578662	+	canonical	TGCTA(A*)T	A	578680	-18	expected	1	1	yes	no	yes	0,0,(1)	0,0,(1)	0,0,(1)	0,0,(1)	SRR957844(1;1),
I	609687	+	canonical	TATTA(A*)C	A	609697	-10	proximal	6	6	no	yes	yes	0,1,(5)	0,1,(5)	0,0,(0)	0,0,(0)	SRR957844(2;2),SRR957843(4;4),
I	623363	+	canonical	CGCTG(A*)C	A	623374	-11	expected	1	1	yes	no	yes	0,0,(1)	0,0,(1)	0,0,(1)	0,0,(1)	SRR957843(1;1),
I	635336	+	canonical	TGCTA(A*)C	A	635348	-12	expected	13	12	yes	yes	yes	1,1,(11)	1,1,(10)	0,0,(11)	0,0,(10)	SRR957843(10;9),SRR957844(3;3),
I	636376	+	canonical	TACTA(A*)C	A	636384	-8	proximal	1	1	no	no	yes	1,0,(0)	1,0,(0)	0,0,(0)	0,0,(0)	SRR957844(1;1),
I	686977	+	canonical	TATTA(A*)C	A	686988	-11	expected	14	12	yes	yes	yes	0,1,(13)	0,1,(11)	0,0,(11)	0,0,(9)	SRR957843(7;7),SRR957844(7;5),
I	691840	+	canonical	CACTA(A*)T	A	691852	-12	expected	1	1	yes	no	yes	0,0,(1)	0,0,(1)	0,0,(1)	0,0,(1)	SRR957843(1;1),
I	692839	+	canonical	CGCTA(A*)C	A	692848	-9	proximal	14	10	yes	yes	yes	1,0,(13)	1,0,(9)	1,0,(13)	1,0,(9)	SRR957844(4;4),SRR957843(10;6),
I	697915	+	canonical	AGCTA(A*)C	A	697927	-12	expected	2	2	yes	no	yes	0,0,(2)	0,0,(2)	0,0,(1)	0,0,(1)	SRR957843(2;2),
I	704192	+	canonical	TATTA(A*)T	A	704204	-12	expected	6	6	yes	yes	yes	0,3,(3)	0,3,(3)	0,0,(3)	0,0,(3)	SRR957843(1;1),SRR957844(5;5),
I	715805	+	canonical	TGCTA(A*)C	A	715993	-188	distal	18	15	yes	yes	yes	0,3,(15)	0,3,(12)	0,0,(15)	0,0,(12)	SRR957844(10;9),SRR957843(8;6),
I	733361	+	canonical	TACTA(A*)T	A	733368	-7	proximal	8	6	yes	yes	yes	0,0,(8)	0,0,(6)	0,0,(8)	0,0,(6)	SRR957844(3;2),SRR957843(5;4),
I	737154	+	canonical	TACTA(A*)C	A	737164	-10	proximal	2	2	yes	yes	yes	0,1,(1)	0,1,(1)	0,0,(1)	0,0,(1)	SRR957844(2;2),
I	750099	+	canonical	CGCTA(A*)C	A	750112	-13	expected	22	20	yes	yes	yes	1,1,(20)	1,1,(18)	1,0,(20)	1,0,(18)	SRR957844(12;10),SRR957843(10;10),
I	777878	+	canonical	TTCTA(A*)C	A	777890	-12	expected	1	1	yes	no	yes	0,0,(1)	0,0,(1)	0,0,(1)	0,0,(1)	SRR957844(1;1),
I	818420	+	canonical	TGCTA(A*)T	A	818428	-8	proximal	1	1	no	no	yes	0,0,(1)	0,0,(1)	0,0,(0)	0,0,(0)	SRR957844(1;1),
I	877162	+	canonical	TGCTA(A*)C	A	877174	-12	expected	4	3	no	yes	yes	4,0,(0)	3,0,(0)	0,0,(0)	0,0,(0)	SRR957844(1;1),SRR957843(3;2),
I	895586	+	canonical	AACTT(A*)C	A	895596	-10	proximal	879	199	yes	yes	yes	1,2,(876)	1,2,(196)	1,1,(688)	1,1,(115)	SRR957842(2;2),SRR957843(573;109),SRR957844(304;88),
I	896027	+	canonical	TGCTA(A*)C	A	896038	-11	expected	1	1	no	no	yes	0,1,(0)	0,1,(0)	0,0,(0)	0,0,(0)	SRR957843(1;1),
I	903535	+	canonical	AACTA(A*)C	A	903545	-10	proximal	8	6	yes	yes	yes	2,3,(3)	2,2,(2)	0,0,(3)	0,0,(2)	SRR957843(4;3),SRR957844(4;3),
I	922880	+	canonical	TATTA(A*)T	A	922892	-12	expected	4	4	no	yes	yes	0,0,(4)	0,0,(4)	0,0,(0)	0,0,(0)	SRR957843(3;3),SRR957844(1;1),
I	930664	+	canonical	TTCTA(A*)C	A	930677	-13	expected	7	5	yes	yes	yes	1,1,(5)	1,1,(3)	0,0,(5)	0,0,(3)	SRR957843(1;1),SRR957844(6;4),
I	942198	+	canonical	AACTA(A*)C	A	942214	-16	expected	2	2	yes	no	yes	0,0,(2)	0,0,(2)	0,0,(2)	0,0,(2)	SRR957843(2;2),
I	942435	+	canonical	TACTT(A*)C	A	942450	-15	expected	28	19	yes	yes	yes	1,0,(27)	1,0,(18)	0,0,(27)	0,0,(18)	SRR957844(14;9),SRR957843(14;10),
I	960584	+	canonical	GACTA(A*)T	A	960607	-23	expected	2	2	yes	no	yes	0,0,(2)	0,0,(2)	0,0,(2)	0,0,(2)	SRR957844(2;2),
I	960595	+	canonical	AACTA(A*)C	A	960607	-12	expected	137	55	yes	yes	yes	8,4,(125)	8,4,(43)	4,2,(124)	4,2,(42)	SRR957842(1;1),SRR957843(83;31),SRR957844(53;23),
I	979106	+	canonical	TTCTA(A*)T	A	979119	-13	expected	7	5	yes	yes	yes	0,1,(6)	0,1,(4)	0,0,(6)	0,0,(4)	SRR957843(7;5),
I	988736	+	canonical	AACTA(A*)C	A	988747	-11	expected	1	1	yes	no	yes	0,0,(1)	0,0,(1)	0,0,(1)	0,0,(1)	SRR957843(1;1),
I	990703	+	canonical	TGCTA(A*)C	A	990711	-8	proximal	4	4	yes	yes	yes	1,0,(3)	1,0,(3)	0,0,(2)	0,0,(2)	SRR957843(4;4),
I	1008838	+	canonical	TACTA(A*)T	A	1008848	-10	proximal	6	4	yes	yes	yes	0,0,(6)	0,0,(4)	0,0,(6)	0,0,(4)	SRR957844(2;1),SRR957843(4;3),
I	1041659	+	canonical	TTCTA(A*)C	A	1041672	-13	expected	1	1	no	no	yes	0,0,(1)	0,0,(1)	0,0,(0)	0,0,(0)	SRR957844(1;1),
I	1049357	+	canonical	TTCTA(A*)C	A	1049364	-7	proximal	2	2	yes	yes	yes	0,0,(2)	0,0,(2)	0,0,(2)	0,0,(2)	SRR957843(1;1),SRR957844(1;1),
I	1050164	+	canonical	GACTA(A*)C	A	1050174	-10	proximal	19	15	yes	yes	yes	1,1,(17)	1,1,(13)	1,0,(15)	1,0,(11)	SRR957843(6;5),SRR957844(13;10),
I	1055158	+	canonical	TGCTA(A*)T	A	1055167	-9	proximal	18	16	yes	yes	yes	2,2,(14)	1,2,(13)	0,0,(14)	0,0,(13)	SRR957844(8;8),SRR957843(10;8),
I	1058487	+	canonical	GGCTT(A*)C	A	1058622	-135	distal	1	1	yes	no	yes	0,0,(1)	0,0,(1)	0,0,(1)	0,0,(1)	SRR957844(1;1),
I	1109043	+	canonical	TTCTA(A*)C	A	1109054	-11	expected	2	2	yes	yes	yes	0,1,(1)	0,1,(1)	0,0,(1)	0,0,(1)	SRR957844(1;1),SRR957843(1;1),
I	1145876	+	canonical	TATTA(A*)C	A	1145887	-11	expected	9	7	yes	yes	yes	0,0,(9)	0,0,(7)	0,0,(9)	0,0,(7)	SRR957843(6;5),SRR957844(3;2),
I	1146099	+	canonical	TATTA(A*)C	A	1146109	-10	proximal	2	1	no	no	yes	0,2,(0)	0,1,(0)	0,0,(0)	0,0,(0)	SRR957843(2;1),
I	1226029	+	canonical	TACTG(A*)C	A	1226038	-9	proximal	31	22	yes	yes	yes	21,0,(10)	13,0,(9)	0,0,(9)	0,0,(8)	SRR957843(18;10),SRR957844(13;12),
I	1275824	+	canonical	TATTA(A*)C	A	1275836	-12	expected	4	4	yes	yes	yes	0,1,(3)	0,1,(3)	0,0,(3)	0,0,(3)	SRR957843(4;4),
I	1276924	+	canonical	TACTA(A*)T	A	1276936	-12	expected	4	4	yes	yes	yes	0,1,(3)	0,1,(3)	0,0,(3)	0,0,(3)	SRR957843(1;1),SRR957844(3;3),
I	1277522	+	canonical	CACTA(A*)T	A	1279819	-2297	distal	1	1	yes	no	yes	0,0,(1)	0,0,(1)	0,0,(1)	0,0,(1)	SRR957843(1;1),
I	1280361	+	canonical	GACTA(A*)C	A	1281106	-745	distal	1	1	yes	no	yes	0,0,(1)	0,0,(1)	0,0,(1)	0,0,(1)	SRR957843(1;1),
I	1283749	+	canonical	AACTA(A*)C	A	1283758	-9	proximal	1	1	yes	no	yes	0,0,(1)	0,0,(1)	0,0,(1)	0,0,(1)	SRR957843(1;1),
I	1285688	+	canonical	AACTA(A*)T	A	1285700	-12	expected	16	11	yes	yes	yes	1,2,(13)	1,2,(8)	0,0,(11)	0,0,(6)	SRR957843(12;7),SRR957844(4;4),
I	1285708	+	canonical	TATTG(A*)C	A	1306568	-20860	distal	1	1	no	no	yes	1,0,(0)	1,0,(0)	0,0,(0)	0,0,(0)	SRR957844(1;1),
I	1321768	+	canonical	AGCTA(A*)T	A	1321781	-13	expected	5	5	yes	yes	yes	0,1,(4)	0,1,(4)	0,0,(4)	0,0,(4)	SRR957844(1;1),SRR957843(4;4),
I	1322124	+	canonical	CGTTA(A*)C	A	1322137	-13	expected	1	1	yes	no	yes	0,0,(1)	0,0,(1)	0,0,(1)	0,0,(1)	SRR957843(1;1),
I	1354678	+	canonical	TGCTA(A*)C	A	1354687	-9	proximal	10	6	yes	yes	yes	0,1,(9)	0,1,(5)	0,0,(7)	0,0,(4)	SRR957843(7;4),SRR957844(3;2),
I	1368636	+	canonical	TACTA(A*)T	A	1368645	-9	proximal	2	2	no	yes	yes	1,1,(0)	1,1,(0)	0,0,(0)	0,0,(0)	SRR957844(2;2),
I	1377018	+	canonical	AATTA(A*)C	A	1377031	-13	expected	1	1	no	no	yes	0,1,(0)	0,1,(0)	0,0,(0)	0,0,(0)	SRR957844(1;1),
I	1422162	+	canonical	CACTA(A*)C	A	1422179	-17	expected	30	19	yes	yes	yes	2,0,(28)	2,0,(17)	1,0,(28)	1,0,(17)	SRR957843(21;12),SRR957844(9;7),
I	1455024	+	canonical	TACTG(A*)C	A	1455043	-19	expected	17	12	yes	yes	yes	12,2,(3)	8,1,(3)	0,0,(3)	0,0,(3)	SRR957843(11;8),SRR957844(6;4),
I	1575660	+	canonical	TGCTT(A*)C	A	1575672	-12	expected	81	54	yes	yes	yes	1,14,(66)	1,14,(39)	1,10,(59)	1,10,(35)	SRR957844(30;22),SRR957843(51;32),
I	1578782	+	canonical	TACTA(A*)C	A	1578792	-10	proximal	204	115	yes	yes	yes	12,31,(161)	12,24,(79)	10,3,(137)	10,3,(59)	SRR957844(87;48),SRR957843(116;66),SRR957842(1;1),
I	1586932	+	canonical	AACTC(A*)C	A	1586943	-11	expected	19	12	yes	yes	yes	0,1,(18)	0,1,(11)	0,0,(17)	0,0,(10)	SRR957844(7;5),SRR957843(12;7),
I	1589448	+	canonical	TGCTA(A*)T	A	1589462	-14	expected	8	8	yes	yes	yes	1,2,(5)	1,2,(5)	1,0,(1)	1,0,(1)	SRR957843(7;7),SRR957844(1;1),
I	1604512	+	canonical	TTCTG(A*)C	A	1604529	-17	expected	2	2	yes	yes	yes	0,0,(2)	0,0,(2)	0,0,(2)	0,0,(2)	SRR957844(1;1),SRR957843(1;1),
I	1632155	+	canonical	TATTA(A*)C	A	1632166	-11	expected	1	1	yes	no	yes	0,0,(1)	0,0,(1)	0,0,(1)	0,0,(1)	SRR957843(1;1),
I	1632352	+	canonical	TACTA(A*)C	A	1632361	-9	proximal	39	30	yes	yes	yes	3,4,(32)	3,4,(23)	1,1,(31)	1,1,(22)	SRR957844(14;9),SRR957843(25;21),
I	1643500	+	canonical	GGCTA(A*)C	A	1643509	-9	proximal	5	5	yes	yes	yes	0,2,(3)	0,2,(3)	0,0,(3)	0,0,(3)	SRR957844(4;4),SRR957843(1;1),
I	1788177	+	canonical	TGCTA(A*)C	A	1788191	-14	expected	4	3	yes	yes	yes	1,0,(3)	1,0,(2)	1,0,(3)	1,0,(2)	SRR957843(3;2),SRR957844(1;1),
I	1838955	+	canonical	TACTA(A*)A	A	1838969	-14	expected	2	2	no	no	yes	2,0,(0)	2,0,(0)	0,0,(0)	0,0,(0)	SRR957843(2;2),
I	1876947	+	canonical	TGCTA(A*)C	A	1876958	-11	expected	3	3	no	yes	yes	2,0,(1)	2,0,(1)	0,0,(0)	0,0,(0)	SRR957844(1;1),SRR957843(2;2),
I	1892911	+	canonical	AACTA(A*)C	A	1892925	-14	expected	4	4	yes	yes	yes	0,0,(4)	0,0,(4)	0,0,(4)	0,0,(4)	SRR957844(1;1),SRR957843(3;3),
I	1900377	+	canonical	TGCTG(A*)C	A	1900385	-8	proximal	7	7	yes	yes	yes	3,0,(4)	3,0,(4)	2,0,(3)	2,0,(3)	SRR957843(5;5),SRR957844(2;2),
I	1916304	+	canonical	TACTG(A*)C	A	1916318	-14	expected	26	22	yes	yes	yes	12,0,(14)	10,0,(12)	0,0,(14)	0,0,(12)	SRR957844(14;11),SRR957843(12;11),
I	1916808	+	canonical	TACTG(A*)C	A	1916817	-9	proximal	44	28	yes	yes	yes	38,1,(5)	22,1,(5)	0,1,(4)	0,1,(4)	SRR957844(16;10),SRR957843(28;18),
I	1923181	+	canonical	TACTA(A*)T	A	1923192	-11	expected	20	11	yes	yes	yes	1,1,(18)	1,1,(9)	0,1,(18)	0,1,(9)	SRR957844(14;6),SRR957843(6;5),
I	1939063	+	canonical	TATTA(A*)C	A	1939074	-11	expected	4	4	yes	yes	yes	0,0,(4)	0,0,(4)	0,0,(4)	0,0,(4)	SRR957844(2;2),SRR957843(2;2),
I	2016824	+	canonical	CGCTA(A*)C	A	2016840	-16	expected	13	12	yes	yes	yes	2,1,(10)	2,1,(9)	1,1,(10)	1,1,(9)	SRR957844(5;4),SRR957843(8;8),
I	2107872	+	canonical	TATTA(A*)C	A	2107881	-9	proximal	6	6	yes	yes	yes	0,1,(5)	0,1,(5)	0,0,(4)	0,0,(4)	SRR957843(4;4),SRR957844(2;2),
I	2123442	+	canonical	TACTG(A*)C	A	2123451	-9	proximal	17	12	yes	yes	yes	11,0,(6)	8,0,(4)	0,0,(6)	0,0,(4)	SRR957844(8;6),SRR957843(9;6),
I	2145911	+	canonical	TGCTA(A*)T	A	2145926	-15	expected	175	79	yes	yes	yes	23,19,(133)	18,15,(46)	6,1,(130)	6,1,(43)	SRR957842(2;2),SRR957843(96;45),SRR957844(77;32),
I	2146031	+	canonical	TACTG(A*)C	A	2146042	-11	expected	1	1	yes	no	yes	0,0,(1)	0,0,(1)	0,0,(1)	0,0,(1)	SRR957844(1;1),
I	2146313	+	canonical	TTCTA(A*)C	A	2146325	-12	expected	34	27	yes	yes	yes	6,5,(23)	4,4,(19)	2,0,(18)	1,0,(14)	SRR957843(12;9),SRR957844(22;18),
I	2152688	+	canonical	TACTA(A*)T	A	2152698	-10	proximal	133	60	yes	yes	yes	0,30,(103)	0,23,(37)	0,4,(99)	0,4,(34)	SRR957843(95;36),SRR957844(38;24),
I	2153457	+	canonical	TACTA(A*)C	A	2153467	-10	proximal	5	4	yes	yes	yes	1,0,(4)	1,0,(3)	1,0,(4)	1,0,(3)	SRR957843(1;1),SRR957844(4;3),
I	2216610	+	canonical	TACTA(A*)T	A	2216620	-10	proximal	1	1	yes	no	yes	0,0,(1)	0,0,(1)	0,0,(1)	0,0,(1)	SRR957843(1;1),
I	2280846	+	canonical	TACTA(A*)C	A	2280859	-13	expected	38	26	yes	yes	yes	7,2,(29)	5,2,(19)	6,1,(28)	4,1,(18)	SRR957844(19;12),SRR957843(19;14),
I	2280980	+	canonical	TGCTA(A*)C	A	2280991	-11	expected	5	3	yes	yes	yes	1,0,(4)	1,0,(2)	0,0,(4)	0,0,(2)	SRR957844(5;3),
I	2281298	+	canonical	TGCTA(A*)C	A	2281307	-9	proximal	1	1	yes	no	yes	0,0,(1)	0,0,(1)	0,0,(1)	0,0,(1)	SRR957843(1;1),
I	2315685	+	canonical	TGCTA(A*)C	A	2315700	-15	expected	28	20	yes	yes	yes	6,2,(20)	4,1,(15)	1,0,(20)	1,0,(15)	SRR957843(23;15),SRR957844(5;5),
I	2340380	+	canonical	TGCTT(A*)C	A	2340391	-11	expected	24	17	yes	yes	yes	1,7,(16)	1,6,(10)	1,0,(14)	1,0,(8)	SRR957843(17;13),SRR957844(7;4),
I	2348416	+	canonical	TACTA(A*)C	A	2348424	-8	proximal	6	6	yes	yes	yes	0,0,(6)	0,0,(6)	0,0,(6)	0,0,(6)	SRR957843(1;1),SRR957844(5;5),
I	2357564	+	canonical	TACTA(A*)C	A	2357575	-11	expected	4	2	yes	yes	yes	0,3,(1)	0,1,(1)	0,0,(1)	0,0,(1)	SRR957844(4;2),
I	2371864	+	canonical	TGCTA(A*)C	A	2371876	-12	expected	1	1	no	no	yes	1,0,(0)	1,0,(0)	0,0,(0)	0,0,(0)	SRR957843(1;1),
I	2377754	+	canonical	TGCTA(A*)C	A	2377764	-10	proximal	203	87	yes	yes	yes	14,47,(142)	11,27,(49)	4,0,(130)	2,0,(40)	SRR957843(105;49),SRR957844(98;38),
I	2426404	+	canonical	TACTA(A*)T	A	2426413	-9	proximal	41	20	yes	yes	yes	1,6,(34)	1,5,(14)	0,0,(33)	0,0,(13)	SRR957844(18;11),SRR957843(23;9),
I	2436456	+	canonical	TGCTA(A*)A	A	2436466	-10	proximal	7	6	no	no	yes	7,0,(0)	6,0,(0)	0,0,(0)	0,0,(0)	SRR957843(7;6),
I	2439842	+	canonical	TTCTA(A*)C	A	2439854	-12	expected	224	117	yes	yes	yes	26,26,(172)	21,22,(74)	18,9,(168)	16,9,(70)	SRR957844(100;51),SRR957842(2;2),SRR957843(122;64),
I	2440494	+	canonical	TGCTA(A*)C	A	2440506	-12	expected	182	94	yes	yes	yes	27,26,(129)	19,16,(59)	2,3,(86)	2,3,(38)	SRR957844(71;36),SRR957843(111;58),
I	2443730	+	canonical	TACTA(A*)C	A	2443740	-10	proximal	1	1	yes	no	yes	0,0,(1)	0,0,(1)	0,0,(1)	0,0,(1)	SRR957844(1;1),
I	2445460	+	canonical	TATTA(A*)C	A	2445472	-12	expected	1	1	yes	no	yes	0,0,(1)	0,0,(1)	0,0,(1)	0,0,(1)	SRR957844(1;1),
I	2445467	+	canonical	AATTA(A*)C	A	2445472	-5	proximal	1	1	yes	no	yes	0,0,(1)	0,0,(1)	0,0,(1)	0,0,(1)	SRR957843(1;1),
I	2445505	+	canonical	GATTA(A*)C	A	2446051	-546	distal	2	2	yes	no	yes	0,0,(2)	0,0,(2)	0,0,(2)	0,0,(2)	SRR957844(2;2),
I	2446038	+	canonical	TCTTA(A*)C	A	2446051	-13	expected	69	40	yes	yes	yes	2,5,(62)	2,5,(33)	0,1,(61)	0,1,(32)	SRR957844(40;23),SRR957843(29;17),
I	2522022	+	canonical	GGCTA(A*)T	A	2522033	-11	expected	10	9	yes	yes	yes	1,0,(9)	1,0,(8)	0,0,(8)	0,0,(7)	SRR957843(8;7),SRR957844(2;2),
I	2564147	+	canonical	TACTA(A*)T	A	2564156	-9	proximal	1	1	no	no	yes	0,1,(0)	0,1,(0)	0,0,(0)	0,0,(0)	SRR957844(1;1),
I	2606387	+	canonical	TTCTT(A*)C	A	2606540	-153	distal	1	1	yes	no	yes	0,0,(1)	0,0,(1)	0,0,(1)	0,0,(1)	SRR957843(1;1),
I	2606529	+	canonical	TACTA(A*)C	A	2606540	-11	expected	7	7	yes	yes	yes	0,3,(4)	0,3,(4)	0,1,(4)	0,1,(4)	SRR957843(5;5),SRR957844(2;2),
I	2608075	+	canonical	TATTA(A*)C	A	2608088	-13	expected	32	21	yes	yes	yes	0,4,(28)	0,3,(18)	0,0,(25)	0,0,(16)	SRR957843(15;10),SRR957844(17;11),
I	2637964	+	canonical	GACTA(A*)T	A	2637978	-14	expected	3	3	yes	yes	yes	0,0,(3)	0,0,(3)	0,0,(3)	0,0,(3)	SRR957843(2;2),SRR957844(1;1),
I	2643842	+	canonical	TATTA(A*)T	A	2643859	-17	expected	388	71	yes	yes	yes	2,10,(376)	1,8,(62)	0,0,(364)	0,0,(50)	SRR957844(166;33),SRR957842(2;2),SRR957843(220;36),
I	2690130	+	canonical	CACTA(A*)C	A	2690152	-22	expected	3	3	yes	yes	yes	2,0,(1)	2,0,(1)	0,0,(1)	0,0,(1)	SRR957844(2;2),SRR957843(1;1),
I	2700646	+	canonical	TACTA(A*)T	A	2700657	-11	expected	41	27	yes	yes	yes	3,1,(37)	3,1,(23)	0,0,(36)	0,0,(22)	SRR957844(21;13),SRR957843(20;14),
I	2708764	+	canonical	TATTA(A*)C	A	2708778	-14	expected	18	16	yes	yes	yes	0,1,(17)	0,1,(15)	0,0,(15)	0,0,(13)	SRR957844(10;8),SRR957843(8;8),
I	2721184	+	canonical	TGCTC(A*)C	A	2721201	-17	expected	15	12	yes	yes	yes	0,4,(11)	0,3,(9)	0,0,(7)	0,0,(5)	SRR957843(6;6),SRR957844(9;6),
I	2722363	+	canonical	TACTA(A*)C	A	2722374	-11	expected	1	1	yes	no	yes	0,0,(1)	0,0,(1)	0,0,(1)	0,0,(1)	SRR957844(1;1),
I	2762644	+	canonical	TTCTG(A*)C	A	2762661	-17	expected	5	4	yes	yes	yes	1,1,(3)	1,1,(2)	0,1,(3)	0,1,(2)	SRR957844(1;1),SRR957842(2;2),SRR957843(2;1),
I	2795280	+	canonical	TACTG(A*)C	A	2795289	-9	proximal	15	13	yes	yes	yes	6,0,(9)	6,0,(7)	1,0,(9)	1,0,(7)	SRR957844(9;7),SRR957843(6;6),
I	2804275	+	canonical	AATTA(A*)T	A	2804387	-112	distal	1	1	no	no	yes	1,0,(0)	1,0,(0)	0,0,(0)	0,0,(0)	SRR957844(1;1),
I	2814919	+	canonical	TACTA(A*)C	A	2814927	-8	proximal	24	19	yes	yes	yes	0,3,(21)	0,3,(16)	0,0,(21)	0,0,(16)	SRR957843(14;12),SRR957844(10;7),
I	2830982	+	canonical	TACTA(A*)C	A	2830991	-9	proximal	21	18	yes	yes	yes	2,1,(18)	2,1,(15)	1,0,(18)	1,0,(15)	SRR957844(5;5),SRR957843(16;13),
I	2852159	+	canonical	GACTA(A*)C	A	2852174	-15	expected	56	38	yes	yes	yes	23,5,(28)	15,4,(19)	0,0,(27)	0,0,(18)	SRR957843(30;20),SRR957844(26;18),
I	2989555	+	canonical	TACTA(A*)T	A	2989564	-9	proximal	1	1	yes	no	yes	0,0,(1)	0,0,(1)	0,0,(1)	0,0,(1)	SRR957844(1;1),
I	2991487	+	canonical	TGCTA(A*)C	A	2991497	-10	proximal	7	6	yes	yes	yes	2,0,(5)	2,0,(4)	0,0,(5)	0,0,(4)	SRR957844(4;3),SRR957843(3;3),
I	3109595	+	canonical	TATTA(A*)C	A	3109605	-10	proximal	6	5	yes	yes	yes	0,5,(1)	0,4,(1)	0,0,(1)	0,0,(1)	SRR957843(4;3),SRR957844(2;2),
I	3144112	+	canonical	AGCTA(A*)C	A	3144124	-12	expected	1	1	no	no	yes	1,0,(0)	1,0,(0)	0,0,(0)	0,0,(0)	SRR957843(1;1),
I	3151779	+	canonical	AGCTA(A*)T	A	3151788	-9	proximal	6	4	no	yes	yes	5,1,(0)	3,1,(0)	0,0,(0)	0,0,(0)	SRR957843(4;3),SRR957844(2;1),
I	3163409	+	canonical	TGCTA(A*)T	A	3163422	-13	expected	15	9	yes	yes	yes	1,3,(11)	1,3,(5)	0,0,(11)	0,0,(5)	SRR957844(10;4),SRR957843(5;5),
I	3166853	+	canonical	TACTA(A*)C	A	3166864	-11	expected	10	9	yes	yes	yes	0,1,(9)	0,1,(8)	0,0,(9)	0,0,(8)	SRR957844(2;2),SRR957843(8;7),
I	3204057	+	canonical	CACTA(A*)C	A	3204067	-10	proximal	1	1	yes	no	yes	0,0,(1)	0,0,(1)	0,0,(1)	0,0,(1)	SRR957844(1;1),
I	3207856	+	canonical	TATTA(A*)C	A	3207869	-13	expected	1	1	no	no	yes	0,0,(1)	0,0,(1)	0,0,(0)	0,0,(0)	SRR957844(1;1),
I	3210307	+	canonical	TTCTA(A*)C	A	3210317	-10	proximal	27	19	yes	yes	yes	1,0,(26)	1,0,(18)	1,0,(26)	1,0,(18)	SRR957843(19;14),SRR957844(8;5),
I	3339332	+	canonical	TGCTA(A*)C	A	3339347	-15	expected	2	2	yes	yes	yes	0,0,(2)	0,0,(2)	0,0,(2)	0,0,(2)	SRR957844(1;1),SRR957843(1;1),
I	3345018	+	canonical	GACTA(A*)C	A	3345030	-12	expected	10	10	yes	yes	yes	0,0,(10)	0,0,(10)	0,0,(9)	0,0,(9)	SRR957843(7;7),SRR957844(3;3),
I	3377502	+	canonical	TACTG(A*)C	A	3377518	-16	expected	28	24	yes	yes	yes	15,1,(12)	12,1,(11)	0,1,(12)	0,1,(11)	SRR957843(14;12),SRR957844(14;12),
I	3384728	+	canonical	TACTT(A*)T	A	3384744	-16	expected	37	25	yes	yes	yes	0,1,(36)	0,1,(24)	0,0,(33)	0,0,(21)	SRR957844(16;9),SRR957843(21;16),
I	3384735	+	canonical	CACTA(A*)T	A	3384744	-9	proximal	728	107	yes	yes	yes	36,24,(668)	24,18,(65)	1,11,(662)	1,7,(59)	SRR957844(320;47),SRR957843(408;60),
I	3388904	+	canonical	AACTA(A*)C	A	3388912	-8	proximal	48	28	yes	yes	yes	6,1,(41)	4,1,(23)	0,0,(41)	0,0,(23)	SRR957843(21;13),SRR957844(27;15),
I	3426197	+	canonical	AACTA(A*)C	A	3426210	-13	expected	15	11	yes	yes	yes	0,0,(15)	0,0,(11)	0,0,(15)	0,0,(11)	SRR957843(9;6),SRR957844(6;5),
I	3431469	+	canonical	CACTA(A*)C	A	3431480	-11	expected	1	1	yes	no	yes	0,0,(1)	0,0,(1)	0,0,(1)	0,0,(1)	SRR957844(1;1),
I	3441475	+	canonical	TACTA(A*)C	A	3441486	-11	expected	1	1	yes	no	yes	0,0,(1)	0,0,(1)	0,0,(1)	0,0,(1)	SRR957844(1;1),
I	3444269	+	canonical	CACTA(A*)C	A	3444281	-12	expected	16	12	yes	yes	yes	0,0,(16)	0,0,(12)	0,0,(14)	0,0,(10)	SRR957844(7;4),SRR957843(9;8),
I	3463242	+	canonical	TATTA(A*)C	A	3463258	-16	expected	16	11	yes	yes	yes	0,4,(12)	0,3,(8)	0,0,(12)	0,0,(8)	SRR957844(8;3),SRR957843(8;8),
I	3485232	+	canonical	AGCTA(A*)T	A	3485240	-8	proximal	2	2	yes	yes	yes	1,0,(1)	1,0,(1)	0,0,(1)	0,0,(1)	SRR957843(1;1),SRR957844(1;1),
I	3486045	+	canonical	TACTG(A*)C	A	3486055	-10	proximal	46	28	yes	yes	yes	23,1,(22)	15,1,(12)	1,1,(20)	1,1,(11)	SRR957843(32;17),SRR957844(14;11),
I	3495031	+	canonical	TACTA(A*)C	A	3495046	-15	expected	8	8	yes	yes	yes	0,1,(7)	0,1,(7)	0,0,(6)	0,0,(6)	SRR957844(3;3),SRR957843(5;5),
I	3499413	+	canonical	TGCTA(A*)C	A	3499428	-15	expected	239	104	yes	yes	yes	44,10,(185)	36,10,(58)	12,2,(179)	11,2,(54)	SRR957844(111;49),SRR957843(128;55),
I	3505303	+	canonical	TACTA(A*)T	A	3505310	-7	proximal	27	17	yes	yes	yes	0,0,(27)	0,0,(17)	0,0,(26)	0,0,(16)	SRR957843(14;10),SRR957844(13;7),
I	3515922	+	canonical	AACTA(A*)C	A	3515932	-10	proximal	4	3	yes	yes	yes	0,0,(4)	0,0,(3)	0,0,(4)	0,0,(3)	SRR957843(1;1),SRR957844(3;2),
I	3528751	+	canonical	AGCTA(A*)T	A	3528762	-11	expected	164	63	yes	yes	yes	29,8,(127)	21,7,(35)	4,2,(124)	3,2,(32)	SRR957844(70;30),SRR957843(94;33),
I	3530603	+	canonical	GGCTA(A*)C	A	3530614	-11	expected	138	73	yes	yes	yes	16,10,(112)	14,5,(54)	15,0,(107)	13,0,(49)	SRR957843(86;48),SRR957844(52;25),
I	3537977	+	canonical	AGTTA(A*)C	A	3537984	-7	proximal	8	8	yes	yes	yes	1,1,(6)	1,1,(6)	0,0,(5)	0,0,(5)	SRR957843(3;3),SRR957844(5;5),
I	3612405	+	canonical	TACTT(A*)C	A	3612421	-16	expected	4	4	yes	yes	yes	0,0,(4)	0,0,(4)	0,0,(4)	0,0,(4)	SRR957843(3;3),SRR957844(1;1),
I	3612864	+	canonical	TGCTA(A*)T	A	3612876	-12	expected	2	2	yes	no	yes	0,0,(2)	0,0,(2)	0,0,(2)	0,0,(2)	SRR957843(2;2),
I	3643617	+	canonical	TGTTA(A*)C	A	3643633	-16	expected	39	29	yes	yes	yes	2,5,(32)	2,5,(22)	0,0,(32)	0,0,(22)	SRR957843(28;21),SRR957844(11;8),
I	3649702	+	canonical	TACTA(A*)T	A	3649715	-13	expected	4	3	yes	yes	yes	0,0,(4)	0,0,(3)	0,0,(4)	0,0,(3)	SRR957844(2;2),SRR957843(2;1),
I	3649789	+	canonical	TTCTA(A*)T	A	3649798	-9	proximal	2	2	yes	yes	yes	0,1,(1)	0,1,(1)	0,0,(1)	0,0,(1)	SRR957843(1;1),SRR957844(1;1),
I	3650458	+	canonical	TACTA(A*)A	A	3655469	-5011	distal	1	1	no	no	yes	0,0,(1)	0,0,(1)	0,0,(0)	0,0,(0)	SRR957844(1;1),
I	3655460	+	canonical	TGCTA(A*)C	A	3655469	-9	proximal	4	4	yes	yes	yes	3,1,(0)	3,1,(0)	1,0,(0)	1,0,(0)	SRR957843(2;2),SRR957844(2;2),
I	3659259	+	canonical	TACTG(A*)T	A	3659270	-11	expected	1	1	no	no	yes	1,0,(0)	1,0,(0)	0,0,(0)	0,0,(0)	SRR957844(1;1),
I	3659514	+	canonical	TACTA(A*)C	A	3659526	-12	expected	75	49	yes	yes	yes	6,7,(62)	4,7,(38)	6,1,(60)	4,1,(36)	SRR957843(46;27),SRR957844(29;22),
I	3666119	+	canonical	TACTA(A*)C	A	3666133	-14	expected	3	3	yes	yes	yes	1,0,(2)	1,0,(2)	0,0,(2)	0,0,(2)	SRR957843(3;3),
I	3667297	+	canonical	TACTA(A*)T	A	3667313	-16	expected	216	64	yes	yes	yes	20,15,(181)	12,9,(43)	0,1,(174)	0,1,(37)	SRR957844(84;25),SRR957843(132;39),
I	3693291	+	canonical	TACTA(A*)A	A	3693302	-11	expected	4	4	yes	yes	yes	0,0,(4)	0,0,(4)	0,0,(1)	0,0,(1)	SRR957844(3;3),SRR957843(1;1),
I	3722986	+	canonical	TACTA(A*)C	A	3722998	-12	expected	120	54	yes	yes	yes	6,8,(106)	5,6,(43)	1,1,(105)	1,1,(42)	SRR957844(66;30),SRR957843(54;24),
I	3727585	+	canonical	TGCTA(A*)T	A	3727603	-18	expected	2	2	yes	no	yes	0,0,(2)	0,0,(2)	0,0,(2)	0,0,(2)	SRR957843(2;2),
I	3730477	+	canonical	TACTA(A*)C	A	3730493	-16	expected	11	10	yes	yes	yes	0,2,(9)	0,2,(8)	0,0,(9)	0,0,(8)	SRR957843(7;7),SRR957844(4;3),
I	3730893	+	canonical	TACTA(A*)C	A	3730903	-10	proximal	69	51	yes	yes	yes	7,8,(54)	5,6,(40)	0,0,(52)	0,0,(38)	SRR957844(37;25),SRR957843(32;26),
I	3731878	+	canonical	TACTA(A*)T	A	3731892	-14	expected	50	27	yes	yes	yes	4,6,(40)	4,5,(18)	1,2,(38)	1,2,(17)	SRR957843(27;15),SRR957844(23;12),
I	3861618	+	canonical	TGCTA(A*)T	A	3861630	-12	expected	1	1	yes	no	yes	0,0,(1)	0,0,(1)	0,0,(1)	0,0,(1)	SRR957843(1;1),
I	3869533	+	canonical	TACTA(A*)C	A	3869547	-14	expected	279	120	yes	yes	yes	54,113,(112)	31,38,(51)	35,5,(98)	20,3,(38)	SRR957843(142;56),SRR957844(137;64),
I	3884833	+	canonical	AACTA(A*)C	A	3884843	-10	proximal	5	5	yes	yes	yes	3,0,(2)	3,0,(2)	2,0,(2)	2,0,(2)	SRR957844(1;1),SRR957843(4;4),
I	3913086	+	canonical	TGCTA(A*)C	A	3913096	-10	proximal	10	7	yes	yes	yes	0,3,(7)	0,3,(4)	0,0,(7)	0,0,(4)	SRR957843(3;2),SRR957844(7;5),
I	3974864	+	canonical	TACTA(A*)C	A	3974878	-14	expected	66	37	yes	yes	yes	10,1,(55)	5,1,(31)	1,1,(55)	1,1,(31)	SRR957843(43;24),SRR957844(23;13),
I	4005146	+	canonical	AGCTA(A*)C	A	4005153	-7	proximal	3	3	yes	yes	yes	1,0,(2)	1,0,(2)	0,0,(2)	0,0,(2)	SRR957844(1;1),SRR957843(2;2),
I	4005325	+	canonical	TGCTA(A*)C	A	4005340	-15	expected	2	2	yes	yes	yes	1,0,(1)	1,0,(1)	0,0,(1)	0,0,(1)	SRR957844(1;1),SRR957843(1;1),
I	4057292	+	canonical	TACTA(A*)C	A	4057303	-11	expected	65	34	yes	yes	yes	3,3,(59)	3,3,(28)	3,1,(56)	3,1,(25)	SRR957844(35;17),SRR957843(30;17),
I	4074376	+	canonical	TACTT(A*)C	A	4074387	-11	expected	6	4	yes	yes	yes	0,0,(6)	0,0,(4)	0,0,(5)	0,0,(3)	SRR957844(5;3),SRR957843(1;1),
I	4167061	+	canonical	AGCTG(A*)C	A	4167076	-15	expected	2	2	no	yes	yes	2,0,(0)	2,0,(0)	0,0,(0)	0,0,(0)	SRR957844(1;1),SRR957843(1;1),
I	4227308	+	canonical	TACTA(A*)C	A	4227316	-8	proximal	171	75	yes	yes	yes	23,19,(129)	16,13,(46)	11,1,(123)	8,1,(41)	SRR957841(3;2),SRR957844(61;24),SRR957843(107;49),
I	4267303	+	canonical	TACTA(A*)T	A	4267320	-17	expected	58	36	yes	yes	yes	22,20,(16)	13,13,(10)	2,0,(3)	2,0,(3)	SRR957843(28;17),SRR957844(30;19),
I	4306176	+	canonical	TACTA(A*)C	A	4306187	-11	expected	5	5	yes	yes	yes	1,0,(4)	1,0,(4)	0,0,(3)	0,0,(3)	SRR957844(2;2),SRR957843(3;3),
I	4365996	+	canonical	TGCTA(A*)C	A	4366008	-12	expected	1	1	yes	no	yes	0,0,(1)	0,0,(1)	0,0,(1)	0,0,(1)	SRR957843(1;1),
I	4383736	+	canonical	TGCTA(A*)C	A	4383749	-13	expected	5	5	yes	yes	yes	1,0,(4)	1,0,(4)	0,0,(4)	0,0,(4)	SRR957844(3;3),SRR957843(2;2),
I	4405509	+	canonical	TACTA(A*)C	A	4405518	-9	proximal	14	11	yes	yes	yes	1,0,(13)	1,0,(10)	0,0,(12)	0,0,(9)	SRR957841(2;1),SRR957844(7;5),SRR957843(4;4),SRR957842(1;1),
I	4415987	+	canonical	TACTA(A*)T	A	4416004	-17	expected	152	49	yes	yes	yes	10,3,(139)	6,3,(40)	0,0,(139)	0,0,(40)	SRR957844(53;20),SRR957843(98;28),SRR957841(1;1),
I	4423101	+	canonical	TATTA(A*)T	A	4423111	-10	proximal	15	12	yes	yes	yes	0,1,(14)	0,1,(11)	0,0,(13)	0,0,(10)	SRR957843(8;6),SRR957844(7;6),
I	4423292	+	canonical	TACTA(A*)C	A	4423306	-14	expected	12	11	yes	yes	yes	1,4,(7)	1,3,(7)	1,0,(5)	1,0,(5)	SRR957844(2;2),SRR957843(10;9),
I	4423507	+	canonical	TACTA(A*)C	A	4423516	-9	proximal	6	6	yes	yes	yes	0,1,(5)	0,1,(5)	0,1,(5)	0,1,(5)	SRR957843(3;3),SRR957844(3;3),
I	4443509	+	canonical	TGCTA(A*)T	A	4443518	-9	proximal	12	12	yes	yes	yes	3,3,(6)	3,3,(6)	0,0,(6)	0,0,(6)	SRR957844(4;4),SRR957843(8;8),
I	4450917	+	canonical	TACTA(A*)C	A	4450925	-8	proximal	5	4	yes	yes	yes	2,0,(3)	2,0,(2)	2,0,(2)	2,0,(1)	SRR957843(4;3),SRR957844(1;1),
I	4481138	+	canonical	TATTA(A*)C	A	4481157	-19	expected	36	27	yes	yes	yes	1,2,(33)	1,2,(24)	0,1,(28)	0,1,(19)	SRR957844(12;11),SRR957843(24;16),
I	4481881	+	canonical	TATTA(A*)C	A	4481892	-11	expected	2	2	yes	no	yes	0,0,(2)	0,0,(2)	0,0,(2)	0,0,(2)	SRR957843(2;2),
I	4490828	+	canonical	TACTA(A*)T	A	4490836	-8	proximal	3	3	yes	no	yes	0,0,(3)	0,0,(3)	0,0,(3)	0,0,(3)	SRR957843(3;3),
I	4498740	+	canonical	TGCTA(A*)T	A	4498757	-17	expected	10	9	yes	yes	yes	3,3,(4)	3,2,(4)	1,0,(4)	1,0,(4)	SRR957844(6;5),SRR957843(4;4),
I	4502496	+	canonical	TATTA(A*)T	A	4502509	-13	expected	8	7	yes	yes	yes	0,2,(6)	0,2,(5)	0,0,(4)	0,0,(3)	SRR957844(2;2),SRR957843(6;5),
I	4502982	+	canonical	GACTA(A*)C	A	4502994	-12	expected	45	31	yes	yes	yes	5,1,(39)	5,1,(25)	2,0,(38)	2,0,(24)	SRR957843(30;22),SRR957844(15;9),
I	4589400	+	canonical	TACTA(A*)T	A	4589409	-9	proximal	31	19	yes	yes	yes	1,3,(27)	1,3,(15)	0,1,(27)	0,1,(15)	SRR957843(16;8),SRR957844(15;11),
I	4614142	+	canonical	TTCTA(A*)T	A	4614151	-9	proximal	1	1	yes	no	yes	0,0,(1)	0,0,(1)	0,0,(1)	0,0,(1)	SRR957843(1;1),
I	4645837	+	canonical	TGCTA(A*)C	A	4645853	-16	expected	40	29	yes	yes	yes	6,3,(31)	5,2,(22)	1,0,(31)	1,0,(22)	SRR957844(26;17),SRR957843(14;12),
I	4655233	+	canonical	AGCTA(A*)C	A	4655246	-13	expected	38	22	yes	yes	yes	5,1,(32)	4,1,(17)	0,0,(32)	0,0,(17)	SRR957843(24;11),SRR957844(14;11),
I	4707376	+	canonical	TACTA(A*)T	A	4707386	-10	proximal	40	29	yes	yes	yes	1,3,(36)	1,3,(25)	0,1,(34)	0,1,(23)	SRR957844(15;11),SRR957843(25;18),
I	4710126	+	canonical	TACTA(A*)C	A	4710138	-12	expected	5	5	yes	yes	yes	0,0,(5)	0,0,(5)	0,0,(5)	0,0,(5)	SRR957843(3;3),SRR957844(2;2),
I	4723362	+	canonical	TACTA(A*)C	A	4723375	-13	expected	81	45	yes	yes	yes	3,7,(71)	3,7,(35)	0,2,(65)	0,2,(31)	SRR957844(34;20),SRR957843(47;25),
I	4767698	+	canonical	TACTA(A*)T	A	4767710	-12	expected	65	31	yes	yes	yes	1,5,(59)	1,5,(25)	0,0,(56)	0,0,(22)	SRR957843(33;16),SRR957844(32;15),
I	4774356	+	canonical	GGCTA(A*)C	A	4774366	-10	proximal	160	51	yes	yes	yes	20,9,(131)	13,7,(31)	17,0,(124)	11,0,(26)	SRR957844(61;22),SRR957843(99;29),
I	4870805	+	canonical	AACTA(A*)T	A	4870822	-17	expected	23	15	yes	yes	yes	2,0,(21)	2,0,(13)	0,0,(21)	0,0,(13)	SRR957844(14;9),SRR957843(9;6),
I	4874370	+	canonical	TACTA(A*)C	A	4874383	-13	expected	85	44	yes	yes	yes	32,15,(38)	17,10,(17)	15,1,(33)	9,1,(13)	SRR957844(37;19),SRR957843(48;25),
I	4874591	+	canonical	TATTA(A*)C	A	4874604	-13	expected	71	47	yes	yes	yes	1,3,(67)	1,3,(43)	0,2,(62)	0,2,(38)	SRR957844(34;26),SRR957843(37;21),
I	4874812	+	canonical	TACTA(A*)C	A	4874825	-13	expected	10	9	yes	yes	yes	1,4,(5)	1,3,(5)	0,0,(3)	0,0,(3)	SRR957844(7;6),SRR957843(3;3),
I	4898735	+	canonical	TACTA(A*)C	A	4898748	-13	expected	2	2	yes	yes	yes	0,0,(2)	0,0,(2)	0,0,(2)	0,0,(2)	SRR957843(1;1),SRR957844(1;1),
I	4902121	+	canonical	TACTA(A*)C	A	4902132	-11	expected	23	13	yes	yes	yes	3,3,(17)	3,2,(8)	2,0,(17)	2,0,(8)	SRR957843(14;8),SRR957844(9;5),
I	4951729	+	canonical	TACTA(A*)T	A	4951736	-7	proximal	44	27	yes	yes	yes	5,3,(36)	4,3,(20)	0,1,(35)	0,1,(19)	SRR957844(12;9),SRR957843(31;17),SRR957842(1;1),
I	4970076	+	canonical	TTTTA(A*)C	A	4970086	-10	proximal	9	8	yes	yes	yes	0,1,(8)	0,1,(7)	0,0,(7)	0,0,(6)	SRR957844(4;4),SRR957843(5;4),
I	4991691	+	canonical	TACTA(A*)C	A	4991705	-14	expected	29	21	yes	yes	yes	11,2,(16)	7,2,(12)	6,0,(16)	3,0,(12)	SRR957843(15;11),SRR957842(1;1),SRR957844(13;9),
I	5005106	+	canonical	TGCTA(A*)C	A	5005120	-14	expected	12	9	yes	yes	yes	0,2,(10)	0,2,(7)	0,0,(9)	0,0,(6)	SRR957843(6;5),SRR957844(6;4),
I	5018377	+	canonical	TACTA(A*)C	A	5018392	-15	expected	64	39	yes	yes	yes	3,8,(53)	3,5,(31)	3,1,(39)	3,1,(22)	SRR957844(23;18),SRR957843(41;21),
I	5022709	+	canonical	TACTA(A*)C	A	5022725	-16	expected	7	5	yes	yes	yes	1,1,(5)	1,1,(3)	1,0,(4)	1,0,(2)	SRR957843(6;4),SRR957844(1;1),
I	5025265	+	canonical	AGCTA(A*)C	A	5025278	-13	expected	23	18	yes	yes	yes	3,5,(15)	3,4,(11)	0,0,(15)	0,0,(11)	SRR957844(6;5),SRR957843(17;13),
I	5120427	+	canonical	TGCTA(A*)C	A	5120440	-13	expected	14	12	yes	yes	yes	3,0,(11)	3,0,(9)	0,0,(10)	0,0,(8)	SRR957844(6;5),SRR957843(8;7),
I	5133918	+	canonical	TGCTA(A*)C	A	5133929	-11	expected	11	10	yes	yes	yes	2,2,(7)	2,1,(7)	0,2,(7)	0,1,(7)	SRR957844(6;5),SRR957843(5;5),
I	5189951	+	canonical	TTCTA(A*)C	A	5189968	-17	expected	33	25	yes	yes	yes	4,6,(23)	3,5,(17)	2,2,(22)	1,2,(16)	SRR957844(11;9),SRR957843(22;16),
I	5207045	+	canonical	TTCTA(A*)T	A	5207060	-15	expected	81	33	yes	yes	yes	4,6,(71)	3,5,(25)	0,1,(69)	0,1,(23)	SRR957844(44;18),SRR957843(37;15),
I	5207292	+	canonical	AACTA(A*)C	A	5207302	-10	proximal	20	17	yes	yes	yes	0,3,(17)	0,3,(14)	0,0,(16)	0,0,(13)	SRR957844(10;9),SRR957843(10;8),
I	5248118	+	canonical	TGCTA(A*)C	A	5248130	-12	expected	73	53	yes	yes	yes	13,12,(48)	10,11,(32)	1,2,(46)	1,2,(30)	SRR957844(28;23),SRR957842(1;1),SRR957843(44;29),
I	5257002	+	canonical	TACTA(A*)T	A	5257012	-10	proximal	145	84	yes	yes	yes	14,93,(38)	13,42,(29)	1,6,(21)	1,5,(17)	SRR957844(39;30),SRR957843(106;54),
I	5257327	+	canonical	TGCTA(A*)T	A	5257341	-14	expected	173	59	yes	yes	yes	29,9,(135)	15,6,(38)	2,1,(131)	1,1,(35)	SRR957844(65;25),SRR957843(108;34),
I	5293451	+	canonical	AACTA(A*)T	A	5293460	-9	proximal	2	1	yes	no	yes	0,0,(2)	0,0,(1)	0,0,(2)	0,0,(1)	SRR957844(2;1),
I	5299207	+	canonical	TACTA(A*)C	A	5299230	-23	expected	41	30	yes	yes	yes	6,6,(29)	6,5,(19)	4,0,(28)	4,0,(18)	SRR957841(1;1),SRR957843(25;21),SRR957844(15;8),
I	5301100	+	canonical	TACTA(A*)A	A	5301115	-15	expected	17	16	no	yes	yes	4,8,(5)	4,7,(5)	0,0,(0)	0,0,(0)	SRR957843(10;9),SRR957844(7;7),
I	5329498	+	canonical	TACTA(A*)T	A	5329505	-7	proximal	4	4	yes	yes	yes	0,0,(4)	0,0,(4)	0,0,(4)	0,0,(4)	SRR957844(2;2),SRR957843(2;2),
I	5329864	+	canonical	TACTA(A*)C	A	5329877	-13	expected	18	15	yes	yes	yes	3,1,(14)	3,1,(11)	0,0,(14)	0,0,(11)	SRR957844(12;10),SRR957843(6;5),
I	5359541	+	canonical	TACTA(A*)C	A	5359550	-9	proximal	568	185	yes	yes	yes	49,81,(438)	35,47,(103)	14,9,(424)	11,8,(91)	SRR957844(258;86),SRR957843(310;99),
I	5367809	+	canonical	TACTA(A*)C	A	5367820	-11	expected	15	11	yes	yes	yes	5,0,(10)	3,0,(8)	2,0,(9)	1,0,(7)	SRR957843(9;7),SRR957844(6;4),
I	5368203	+	canonical	TGCTA(A*)C	A	5368217	-14	expected	50	33	yes	yes	yes	11,4,(35)	8,4,(21)	6,0,(34)	5,0,(20)	SRR957844(26;17),SRR957843(24;16),
I	5383217	+	canonical	TACTA(A*)C	A	5383229	-12	expected	211	74	yes	yes	yes	26,17,(168)	16,10,(48)	3,4,(166)	2,3,(46)	SRR957843(109;41),SRR957842(2;2),SRR957844(100;31),
I	5429107	+	canonical	TGCTA(A*)C	A	5429118	-11	expected	185	81	yes	yes	yes	22,8,(155)	16,7,(58)	2,0,(151)	2,0,(54)	SRR957844(61;28),SRR957843(124;53),
II	196258	-	canonical	AACTA(A*)T	A	196244	-14	expected	40	22	yes	yes	yes	0,0,(40)	0,0,(22)	0,0,(39)	0,0,(21)	SRR957844(22;13),SRR957843(18;9),
II	221163	-	canonical	TGTTA(A*)C	A	221150	-13	expected	2	2	yes	yes	yes	1,0,(1)	1,0,(1)	0,0,(1)	0,0,(1)	SRR957844(1;1),SRR957843(1;1),
II	244861	-	canonical	TAGTA(A*)C	A	244713	-148	distal	1	1	yes	no	yes	0,0,(1)	0,0,(1)	0,0,(1)	0,0,(1)	SRR957844(1;1),
II	259715	-	canonical	TACTA(A*)C	A	259704	-11	expected	131	58	yes	yes	yes	7,11,(113)	4,11,(43)	0,3,(110)	0,3,(40)	SRR957843(70;30),SRR957844(61;28),
II	296320	-	canonical	TACTA(A*)C	A	296306	-14	expected	47	33	yes	yes	yes	0,0,(47)	0,0,(33)	0,0,(27)	0,0,(20)	SRR957843(26;17),SRR957844(21;16),
II	296544	-	canonical	TACTA(A*)C	A	296533	-11	expected	51	37	yes	yes	yes	1,23,(27)	1,18,(18)	0,4,(25)	0,4,(16)	SRR957844(15;13),SRR957843(36;24),
II	343340	-	canonical	TACTA(A*)C	A	343322	-18	expected	9	9	yes	yes	yes	2,2,(5)	2,2,(5)	1,0,(5)	1,0,(5)	SRR957844(3;3),SRR957843(6;6),
II	343645	-	canonical	TTCTA(A*)C	A	343627	-18	expected	16	14	yes	yes	yes	4,1,(11)	4,1,(9)	1,0,(10)	1,0,(8)	SRR957844(7;6),SRR957843(9;8),
II	343862	-	canonical	GGCTA(A*)C	A	343849	-13	expected	21	17	yes	yes	yes	5,2,(14)	4,2,(11)	1,0,(11)	1,0,(9)	SRR957844(7;5),SRR957843(14;12),
II	345960	-	canonical	TACTA(A*)C	A	345947	-13	expected	5	5	yes	yes	yes	0,1,(4)	0,1,(4)	0,0,(4)	0,0,(4)	SRR957843(4;4),SRR957844(1;1),
II	383624	-	canonical	TACTA(A*)T	A	383612	-12	expected	2	1	no	no	yes	0,2,(0)	0,1,(0)	0,0,(0)	0,0,(0)	SRR957844(2;1),
II	401924	-	canonical	TACTA(A*)C	A	401910	-14	expected	17	15	yes	yes	yes	2,1,(14)	2,1,(12)	0,0,(14)	0,0,(12)	SRR957844(7;7),SRR957843(10;8),
II	428557	-	canonical	CGCTA(A*)C	A	428547	-10	proximal	8	6	yes	yes	yes	0,0,(8)	0,0,(6)	0,0,(8)	0,0,(6)	SRR957844(5;3),SRR957843(3;3),
II	441849	-	canonical	TACTA(A*)C	A	441840	-9	proximal	1	1	yes	no	yes	0,0,(1)	0,0,(1)	0,0,(1)	0,0,(1)	SRR957843(1;1),
II	452433	-	canonical	TGCTA(A*)C	A	452416	-17	expected	20	12	yes	yes	yes	2,1,(17)	2,1,(9)	0,1,(17)	0,1,(9)	SRR957844(8;4),SRR957843(12;8),
II	468621	-	canonical	TGCTA(A*)C	A	468609	-12	expected	6	5	yes	yes	yes	1,1,(4)	1,1,(3)	1,0,(4)	1,0,(3)	SRR957844(2;2),SRR957843(4;3),
II	480380	-	canonical	TGCTA(A*)T	A	480369	-11	expected	106	54	yes	yes	yes	13,6,(87)	12,6,(36)	0,0,(82)	0,0,(33)	SRR957844(42;22),SRR957843(64;32),
II	480487	-	canonical	AGCTG(A*)T	A	480369	-118	distal	1	1	no	no	yes	1,0,(0)	1,0,(0)	0,0,(0)	0,0,(0)	SRR957843(1;1),
II	493092	-	canonical	TACTA(A*)T	A	493083	-9	proximal	187	68	yes	yes	yes	5,10,(172)	4,10,(54)	0,5,(166)	0,5,(48)	SRR957843(81;28),SRR957842(2;2),SRR957844(104;38),
II	493495	-	canonical	TATTA(A*)C	A	493480	-15	expected	1	1	no	no	yes	0,0,(1)	0,0,(1)	0,0,(0)	0,0,(0)	SRR957843(1;1),
II	546163	-	canonical	TGCTA(A*)C	A	546152	-11	expected	4	4	yes	yes	yes	0,1,(3)	0,1,(3)	0,0,(3)	0,0,(3)	SRR957843(3;3),SRR957844(1;1),
II	546474	-	canonical	TACTA(A*)C	A	546464	-10	proximal	6	5	yes	yes	yes	0,1,(5)	0,1,(4)	0,0,(5)	0,0,(4)	SRR957843(3;3),SRR957844(3;2),
II	560045	-	canonical	TACTT(A*)C	A	560028	-17	expected	40	30	yes	yes	yes	0,3,(37)	0,3,(27)	0,1,(36)	0,1,(26)	SRR957844(20;12),SRR957843(20;18),
II	584947	-	canonical	AACTA(A*)C	A	584935	-12	expected	1	1	no	no	yes	1,0,(0)	1,0,(0)	0,0,(0)	0,0,(0)	SRR957843(1;1),
II	585425	-	canonical	GACTA(A*)C	A	585411	-14	expected	6	6	yes	yes	yes	0,1,(5)	0,1,(5)	0,0,(5)	0,0,(5)	SRR957843(2;2),SRR957844(4;4),
II	604589	-	canonical	CACTA(A*)C	A	604577	-12	expected	1	1	yes	no	yes	0,0,(1)	0,0,(1)	0,0,(1)	0,0,(1)	SRR957844(1;1),
II	616178	-	canonical	TACTA(A*)C	A	616163	-15	expected	45	36	yes	yes	yes	2,10,(33)	2,10,(24)	2,2,(28)	2,2,(22)	SRR957843(24;21),SRR957844(21;15),
II	617986	-	canonical	TGCTA(A*)T	A	617968	-18	expected	84	45	yes	yes	yes	8,7,(69)	5,6,(34)	0,0,(67)	0,0,(32)	SRR957844(42;20),SRR957843(42;25),
II	632158	-	canonical	TGCTG(A*)C	A	632142	-16	expected	5	3	yes	yes	yes	3,0,(2)	2,0,(1)	0,0,(2)	0,0,(1)	SRR957843(3;2),SRR957844(2;1),
II	632277	-	canonical	TACTA(A*)C	A	632267	-10	proximal	63	41	yes	yes	yes	5,7,(51)	5,6,(30)	2,1,(49)	2,1,(29)	SRR957843(39;24),SRR957844(24;17),
II	632445	-	canonical	TTCTA(A*)C	A	632433	-12	expected	1	1	yes	no	yes	0,0,(1)	0,0,(1)	0,0,(1)	0,0,(1)	SRR957843(1;1),
II	635556	-	canonical	TGCTT(A*)C	A	635544	-12	expected	38	31	yes	yes	yes	0,9,(29)	0,7,(24)	0,2,(26)	0,2,(22)	SRR957844(17;13),SRR957843(21;18),
II	648082	-	canonical	TACTA(A*)T	A	648070	-12	expected	1	1	yes	no	yes	0,1,(0)	0,1,(0)	0,1,(0)	0,1,(0)	SRR957843(1;1),
II	790028	-	canonical	TGCTA(A*)T	A	790017	-11	expected	2	2	yes	no	yes	0,0,(2)	0,0,(2)	0,0,(2)	0,0,(2)	SRR957844(2;2),
II	802671	-	canonical	TACTA(A*)T	A	802651	-20	expected	16	16	yes	yes	yes	3,3,(10)	3,3,(10)	1,0,(6)	1,0,(6)	SRR957844(4;4),SRR957843(12;12),
II	817292	-	canonical	TACTG(A*)C	A	817279	-13	expected	44	34	yes	yes	yes	23,1,(20)	16,1,(17)	1,1,(19)	1,1,(16)	SRR957844(24;19),SRR957843(20;15),
II	852858	-	canonical	TACTG(A*)C	A	852847	-11	expected	2	2	yes	yes	yes	1,0,(1)	1,0,(1)	0,0,(1)	0,0,(1)	SRR957844(1;1),SRR957843(1;1),
II	888154	-	canonical	TGCTA(A*)T	A	888142	-12	expected	452	90	yes	yes	yes	46,11,(395)	26,10,(54)	0,7,(391)	0,7,(51)	SRR957843(239;44),SRR957844(212;45),SRR957841(1;1),
II	896306	-	canonical	AGCTA(A*)T	A	888142	-8164	distal	1	1	no	no	yes	0,1,(0)	0,1,(0)	0,0,(0)	0,0,(0)	SRR957844(1;1),
II	969281	-	canonical	TACTA(A*)C	A	969265	-16	expected	4	3	yes	yes	yes	0,0,(4)	0,0,(3)	0,0,(4)	0,0,(3)	SRR957843(2;1),SRR957844(2;2),
II	988012	-	canonical	TACTA(A*)T	A	988001	-11	expected	53	33	yes	yes	yes	1,3,(49)	1,3,(29)	0,0,(47)	0,0,(27)	SRR957844(18;13),SRR957843(35;20),
II	988203	-	canonical	TAATA(A*)C	A	988001	-202	distal	2	2	yes	yes	yes	0,0,(2)	0,0,(2)	0,0,(2)	0,0,(2)	SRR957844(1;1),SRR957843(1;1),
II	1039909	-	canonical	TACTA(A*)C	A	1039902	-7	proximal	13	12	yes	yes	yes	1,2,(10)	1,2,(9)	1,1,(9)	1,1,(8)	SRR957843(10;10),SRR957844(3;2),
II	1062645	-	canonical	GACTA(A*)C	A	1062635	-10	proximal	3	2	yes	no	yes	0,0,(3)	0,0,(2)	0,0,(3)	0,0,(2)	SRR957844(3;2),
II	1069699	-	canonical	TTCTA(A*)C	A	1069688	-11	expected	1	1	yes	no	yes	0,0,(1)	0,0,(1)	0,0,(1)	0,0,(1)	SRR957844(1;1),
II	1088586	-	canonical	TGCTA(A*)T	A	1088574	-12	expected	64	44	yes	yes	yes	13,13,(38)	12,10,(22)	4,2,(35)	4,2,(19)	SRR957843(42;28),SRR957844(22;16),
II	1101092	-	canonical	TACTA(A*)T	A	1101080	-12	expected	9	8	yes	yes	yes	1,0,(8)	1,0,(7)	0,0,(8)	0,0,(7)	SRR957844(4;3),SRR957843(5;5),
II	1104074	-	canonical	TATTA(A*)C	A	1104063	-11	expected	1	1	no	no	yes	1,0,(0)	1,0,(0)	0,0,(0)	0,0,(0)	SRR957844(1;1),
II	1104388	-	canonical	TGCTG(A*)C	A	1104376	-12	expected	1	1	no	no	yes	1,0,(0)	1,0,(0)	0,0,(0)	0,0,(0)	SRR957843(1;1),
II	1120000	-	canonical	TACTA(A*)T	A	1119982	-18	expected	25	20	yes	yes	yes	0,6,(19)	0,5,(15)	0,0,(16)	0,0,(12)	SRR957844(12;9),SRR957843(13;11),
II	1131092	-	canonical	TACTA(A*)T	A	1131078	-14	expected	1	1	yes	no	yes	0,0,(1)	0,0,(1)	0,0,(1)	0,0,(1)	SRR957843(1;1),
II	1162675	-	canonical	TCCTA(A*)C	A	1162665	-10	proximal	3	2	yes	yes	yes	0,0,(3)	0,0,(2)	0,0,(3)	0,0,(2)	SRR957843(2;1),SRR957844(1;1),
II	1175375	-	canonical	TACTA(A*)T	A	1175365	-10	proximal	23	16	yes	yes	yes	2,0,(21)	2,0,(14)	0,0,(20)	0,0,(13)	SRR957843(19;12),SRR957844(4;4),
II	1186584	-	canonical	TACTT(A*)C	A	1175365	-11219	distal	3	2	yes	yes	yes	0,1,(2)	0,1,(1)	0,0,(2)	0,0,(1)	SRR957844(3;2),
II	1186649	-	canonical	TATTA(A*)T	A	1186640	-9	proximal	8	7	no	yes	yes	1,2,(5)	1,1,(5)	0,0,(0)	0,0,(0)	SRR957844(4;3),SRR957843(4;4),
II	1186861	-	canonical	TACTA(A*)C	A	1186846	-15	expected	22	17	yes	yes	yes	0,3,(19)	0,3,(14)	0,1,(19)	0,1,(14)	SRR957843(8;6),SRR957844(14;11),
II	1199252	-	canonical	TCCTA(A*)C	A	1199241	-11	expected	20	17	yes	yes	yes	0,2,(18)	0,2,(15)	0,1,(17)	0,1,(14)	SRR957843(6;6),SRR957844(14;11),
II	1238611	-	canonical	CACTA(A*)C	A	1238600	-11	expected	296	84	yes	yes	yes	13,15,(268)	10,12,(62)	1,4,(263)	1,4,(58)	SRR957843(165;42),SRR957844(131;42),
II	1238927	-	canonical	TACTA(A*)C	A	1238915	-12	expected	305	124	yes	yes	yes	5,79,(221)	5,31,(88)	2,7,(178)	2,5,(63)	SRR957842(4;3),SRR957843(156;65),SRR957844(145;56),
II	1280836	-	canonical	TATTA(A*)C	A	1280820	-16	expected	9	8	yes	yes	yes	0,0,(9)	0,0,(8)	0,0,(9)	0,0,(8)	SRR957844(5;5),SRR957843(4;3),
II	1374346	-	canonical	CGCTA(A*)T	A	1374338	-8	proximal	17	9	yes	yes	yes	1,0,(16)	1,0,(8)	0,0,(16)	0,0,(8)	SRR957843(7;3),SRR957844(10;6),
II	1377919	-	canonical	TACTA(A*)C	A	1377909	-10	proximal	33	25	yes	yes	yes	4,1,(28)	4,1,(20)	1,0,(28)	1,0,(20)	SRR957843(23;16),SRR957844(10;9),
II	1381152	-	canonical	TATTA(A*)C	A	1381143	-9	proximal	1	1	yes	no	yes	0,0,(1)	0,0,(1)	0,0,(1)	0,0,(1)	SRR957843(1;1),
II	1404854	-	canonical	AGCTA(A*)C	A	1404842	-12	expected	22	21	yes	yes	yes	5,4,(13)	5,3,(13)	2,0,(13)	2,0,(13)	SRR957844(9;9),SRR957843(13;12),
II	1409709	-	canonical	CGCTA(A*)C	A	1409699	-10	proximal	1	1	no	no	yes	1,0,(0)	1,0,(0)	0,0,(0)	0,0,(0)	SRR957843(1;1),
II	1432243	-	canonical	TACTT(A*)C	A	1432230	-13	expected	6	5	yes	yes	yes	0,0,(6)	0,0,(5)	0,0,(6)	0,0,(5)	SRR957844(3;3),SRR957843(3;2),
II	1450812	-	canonical	TTTTA(A*)C	A	1450794	-18	expected	1	1	yes	no	yes	0,0,(1)	0,0,(1)	0,0,(1)	0,0,(1)	SRR957844(1;1),
II	1466045	-	canonical	TACTA(A*)C	A	1466035	-10	proximal	5	5	yes	yes	yes	1,0,(4)	1,0,(4)	0,0,(4)	0,0,(4)	SRR957843(2;2),SRR957844(3;3),
II	1489353	-	canonical	TGCTA(A*)T	A	1489344	-9	proximal	14	10	yes	yes	yes	2,0,(12)	1,0,(9)	0,0,(12)	0,0,(9)	SRR957843(7;5),SRR957844(7;5),
II	1497034	-	canonical	TGCTA(A*)T	A	1497019	-15	expected	19	15	yes	yes	yes	2,1,(16)	2,1,(12)	0,0,(16)	0,0,(12)	SRR957843(11;9),SRR957844(8;6),
II	1508934	-	canonical	TATTA(A*)C	A	1508924	-10	proximal	3	3	yes	no	yes	0,0,(3)	0,0,(3)	0,0,(3)	0,0,(3)	SRR957843(3;3),
II	1513533	-	canonical	TTCTA(A*)C	A	1513520	-13	expected	2	2	yes	yes	yes	0,0,(2)	0,0,(2)	0,0,(2)	0,0,(2)	SRR957844(1;1),SRR957843(1;1),
II	1535476	-	canonical	TACTA(A*)C	A	1535464	-12	expected	613	217	yes	yes	yes	93,73,(447)	59,38,(120)	49,8,(418)	32,6,(99)	SRR957843(320;120),SRR957844(293;97),
II	1756055	-	canonical	TACTG(A*)C	A	1756042	-13	expected	109	53	yes	yes	yes	18,2,(89)	10,2,(41)	0,0,(87)	0,0,(39)	SRR957843(71;31),SRR957844(38;22),
II	1756686	-	canonical	TACTA(A*)C	A	1756672	-14	expected	1	1	yes	no	yes	0,0,(1)	0,0,(1)	0,0,(1)	0,0,(1)	SRR957844(1;1),
II	1757009	-	canonical	AACTA(A*)T	A	1756990	-19	expected	3	3	no	yes	yes	2,1,(0)	2,1,(0)	0,0,(0)	0,0,(0)	SRR957844(2;2),SRR957843(1;1),
II	1759867	-	canonical	TTCTA(A*)C	A	1759860	-7	proximal	32	30	yes	yes	yes	1,8,(23)	1,8,(21)	1,3,(22)	1,3,(20)	SRR957844(15;14),SRR957843(17;16),
II	1760179	-	canonical	TGCTA(A*)T	A	1760161	-18	expected	2	2	no	yes	yes	2,0,(0)	2,0,(0)	0,0,(0)	0,0,(0)	SRR957844(1;1),SRR957843(1;1),
II	1764871	-	canonical	TGCTA(A*)C	A	1764858	-13	expected	21	18	yes	yes	yes	6,1,(14)	5,1,(12)	0,1,(13)	0,1,(11)	SRR957843(11;10),SRR957844(10;8),
II	1785761	-	canonical	TACTA(A*)C	A	1785748	-13	expected	31	27	yes	yes	yes	1,7,(23)	1,7,(19)	1,0,(23)	1,0,(19)	SRR957843(22;18),SRR957844(9;9),
II	1822173	-	canonical	TGCTA(A*)T	A	1822163	-10	proximal	77	36	yes	yes	yes	22,2,(53)	15,2,(19)	3,2,(53)	2,2,(19)	SRR957843(41;19),SRR957844(36;17),
II	1834460	-	canonical	TATTA(A*)C	A	1834449	-11	expected	9	8	yes	yes	yes	0,1,(8)	0,1,(7)	0,0,(8)	0,0,(7)	SRR957843(6;5),SRR957844(3;3),
II	1855809	-	canonical	TACTA(A*)C	A	1855795	-14	expected	3	3	yes	yes	yes	0,1,(2)	0,1,(2)	0,0,(1)	0,0,(1)	SRR957843(3;3),
II	1865350	-	canonical	GACTA(A*)C	A	1865331	-19	expected	4	3	yes	yes	yes	0,0,(4)	0,0,(3)	0,0,(4)	0,0,(3)	SRR957843(3;2),SRR957844(1;1),
II	1891413	-	canonical	CGCTA(A*)T	A	1891395	-18	expected	418	120	yes	yes	yes	32,55,(331)	24,31,(65)	2,5,(316)	2,4,(54)	SRR957844(190;55),SRR957843(226;63),SRR957842(2;2),
II	1919710	-	canonical	TTCTA(A*)C	A	1919701	-9	proximal	16	14	yes	yes	yes	2,0,(14)	2,0,(12)	1,0,(14)	1,0,(12)	SRR957843(10;8),SRR957844(6;6),
II	1937969	-	canonical	TACTA(A*)C	A	1937958	-11	expected	7	7	yes	yes	yes	2,2,(3)	2,2,(3)	1,0,(3)	1,0,(3)	SRR957844(4;4),SRR957843(3;3),
II	2000372	-	canonical	TTCTA(A*)C	A	2000359	-13	expected	9	9	yes	yes	yes	0,1,(8)	0,1,(8)	0,0,(8)	0,0,(8)	SRR957844(4;4),SRR957843(5;5),
II	2030501	-	canonical	TGCTA(A*)T	A	2030486	-15	expected	10	9	yes	yes	yes	1,1,(8)	1,1,(7)	0,0,(7)	0,0,(6)	SRR957844(4;4),SRR957843(6;5),
II	2030813	-	canonical	TGCTA(A*)C	A	2030795	-18	expected	7	4	yes	yes	yes	5,0,(2)	3,0,(1)	1,0,(2)	1,0,(1)	SRR957841(1;1),SRR957843(6;3),
II	2050370	-	canonical	TGTTA(A*)C	A	2050358	-12	expected	1	1	yes	no	yes	0,0,(1)	0,0,(1)	0,0,(1)	0,0,(1)	SRR957844(1;1),
II	2057457	-	canonical	TACTA(A*)T	A	2057446	-11	expected	1	1	yes	no	yes	0,0,(1)	0,0,(1)	0,0,(1)	0,0,(1)	SRR957843(1;1),
II	2079651	-	canonical	TACTA(A*)C	A	2079641	-10	proximal	1	1	yes	no	yes	0,0,(1)	0,0,(1)	0,0,(1)	0,0,(1)	SRR957843(1;1),
II	2162266	-	canonical	TACTA(A*)C	A	2162256	-10	proximal	58	37	yes	yes	yes	1,7,(50)	1,6,(30)	0,0,(39)	0,0,(23)	SRR957843(43;28),SRR957844(15;9),
II	2162277	-	canonical	TGCTC(A*)T	A	2162256	-21	expected	2	2	yes	no	yes	0,0,(2)	0,0,(2)	0,0,(2)	0,0,(2)	SRR957843(2;2),
II	2184110	-	canonical	TACTA(A*)C	A	2184098	-12	expected	23	20	yes	yes	yes	6,7,(10)	6,6,(8)	1,0,(7)	1,0,(6)	SRR957843(16;14),SRR957844(7;6),
II	2184416	-	canonical	TGCTA(A*)C	A	2184405	-11	expected	1	1	no	no	yes	1,0,(0)	1,0,(0)	0,0,(0)	0,0,(0)	SRR957843(1;1),
II	2264885	-	canonical	AACTA(A*)T	A	2264873	-12	expected	107	55	yes	yes	yes	6,6,(95)	6,6,(43)	1,0,(90)	1,0,(39)	SRR957843(45;23),SRR957844(62;32),
II	2318261	-	canonical	TGCTA(A*)T	A	2318251	-10	proximal	45	30	yes	yes	yes	2,8,(35)	2,6,(22)	1,1,(30)	1,1,(18)	SRR957841(1;1),SRR957844(22;14),SRR957843(22;15),
II	2343013	-	canonical	CGCTA(A*)C	A	2343000	-13	expected	22	18	yes	yes	yes	1,4,(17)	1,3,(14)	1,0,(15)	1,0,(13)	SRR957843(8;7),SRR957844(14;11),
II	2349108	-	canonical	TGCTA(A*)C	A	2349095	-13	expected	45	27	yes	yes	yes	0,7,(38)	0,6,(21)	0,0,(38)	0,0,(21)	SRR957844(26;16),SRR957843(19;11),
II	2349131	-	canonical	TATTT(A*)T	A	2349095	-36	expected	3	3	yes	yes	yes	0,0,(3)	0,0,(3)	0,0,(3)	0,0,(3)	SRR957844(2;2),SRR957843(1;1),
II	2363014	-	canonical	TACTA(A*)C	A	2363003	-11	expected	1	1	yes	no	yes	0,0,(1)	0,0,(1)	0,0,(1)	0,0,(1)	SRR957844(1;1),
II	2371252	-	canonical	TTCTC(A*)C	A	2371243	-9	proximal	30	27	yes	yes	yes	0,5,(25)	0,4,(23)	0,0,(20)	0,0,(18)	SRR957844(15;14),SRR957843(14;12),SRR957842(1;1),
II	2394623	-	canonical	AACTA(A*)C	A	2394609	-14	expected	380	136	yes	yes	yes	90,40,(250)	33,22,(81)	83,4,(222)	27,4,(64)	SRR957844(164;58),SRR957843(216;78),
II	2405632	-	canonical	TACTA(A*)T	A	2405621	-11	expected	65	34	yes	yes	yes	1,9,(55)	1,6,(27)	0,0,(54)	0,0,(26)	SRR957843(44;23),SRR957844(21;11),
II	2419442	-	canonical	TATTA(A*)C	A	2419431	-11	expected	12	9	yes	yes	yes	0,1,(11)	0,1,(8)	0,0,(11)	0,0,(8)	SRR957844(4;4),SRR957843(8;5),
II	2433137	-	canonical	TGCTA(A*)T	A	2420858	-12279	distal	1	1	yes	no	yes	0,0,(1)	0,0,(1)	0,0,(1)	0,0,(1)	SRR957843(1;1),
II	2450516	-	canonical	TACTA(A*)T	A	2450505	-11	expected	80	50	yes	yes	yes	4,13,(63)	4,9,(37)	0,1,(57)	0,1,(31)	SRR957844(30;21),SRR957843(50;29),
II	2450792	-	canonical	TGCTA(A*)T	A	2450781	-11	expected	1	1	yes	no	yes	0,0,(1)	0,0,(1)	0,0,(1)	0,0,(1)	SRR957843(1;1),
II	2483647	-	canonical	TATTA(A*)C	A	2483637	-10	proximal	3	3	yes	no	yes	0,0,(3)	0,0,(3)	0,0,(3)	0,0,(3)	SRR957843(3;3),
II	2490055	-	canonical	TGCTA(A*)C	A	2490047	-8	proximal	19	18	yes	yes	yes	9,2,(8)	8,2,(8)	6,0,(5)	5,0,(5)	SRR957843(14;14),SRR957844(5;4),
II	2490849	-	canonical	AGCTA(A*)C	A	2490840	-9	proximal	45	28	yes	yes	yes	7,2,(36)	6,1,(21)	0,2,(34)	0,1,(20)	SRR957844(26;16),SRR957843(19;12),
II	2522640	-	canonical	TGCTA(A*)C	A	2522624	-16	expected	494	208	yes	yes	yes	88,75,(331)	57,39,(112)	54,8,(315)	38,7,(97)	SRR957841(2;1),SRR957844(197;91),SRR957843(295;116),
II	2565279	-	canonical	TGCTA(A*)C	A	2565268	-11	expected	2	2	yes	yes	yes	0,1,(1)	0,1,(1)	0,0,(1)	0,0,(1)	SRR957843(2;2),
II	2575109	-	canonical	CACTA(A*)C	A	2575096	-13	expected	85	47	yes	yes	yes	6,2,(77)	5,2,(40)	2,1,(77)	2,1,(40)	SRR957843(43;25),SRR957842(1;1),SRR957844(41;21),
II	2592317	-	canonical	TACTA(A*)C	A	2592305	-12	expected	1	1	no	no	yes	0,0,(1)	0,0,(1)	0,0,(0)	0,0,(0)	SRR957843(1;1),
II	2592855	-	canonical	TTCTA(A*)T	A	2592846	-9	proximal	6	5	yes	no	yes	0,0,(6)	0,0,(5)	0,0,(6)	0,0,(5)	SRR957843(6;5),
II	2605030	-	canonical	TACTA(A*)C	A	2605021	-9	proximal	2	2	yes	yes	yes	0,0,(2)	0,0,(2)	0,0,(2)	0,0,(2)	SRR957843(1;1),SRR957844(1;1),
II	2672045	-	canonical	AGCTA(A*)C	A	2672035	-10	proximal	10	10	yes	yes	yes	1,3,(6)	1,3,(6)	0,0,(6)	0,0,(6)	SRR957844(4;4),SRR957843(6;6),
II	2687753	-	canonical	AGCTA(A*)T	A	2687736	-17	expected	12	10	yes	yes	yes	2,0,(10)	2,0,(8)	0,0,(10)	0,0,(8)	SRR957844(4;3),SRR957843(8;7),
II	2719874	-	canonical	TATTA(A*)C	A	2719864	-10	proximal	3	3	yes	yes	yes	0,1,(2)	0,1,(2)	0,0,(2)	0,0,(2)	SRR957843(2;2),SRR957844(1;1),
II	2720598	-	canonical	TACTA(A*)C	A	2720590	-8	proximal	32	23	yes	yes	yes	3,3,(26)	3,3,(17)	2,1,(25)	2,1,(16)	SRR957844(13;9),SRR957843(19;14),
II	2749524	-	canonical	TACTA(A*)T	A	2749517	-7	proximal	6	6	yes	yes	yes	0,0,(6)	0,0,(6)	0,0,(6)	0,0,(6)	SRR957842(1;1),SRR957843(3;3),SRR957844(2;2),
II	2764693	-	canonical	TACTA(A*)T	A	2764682	-11	expected	3	2	yes	yes	yes	1,0,(2)	1,0,(1)	0,0,(2)	0,0,(1)	SRR957843(3;2),
II	2765382	-	canonical	TACTA(A*)C	A	2765367	-15	expected	4	3	yes	yes	yes	0,0,(4)	0,0,(3)	0,0,(4)	0,0,(3)	SRR957843(2;2),SRR957844(2;1),
II	2785667	-	canonical	AGCTA(A*)T	A	2785654	-13	expected	13	10	yes	yes	yes	1,0,(12)	1,0,(9)	0,0,(12)	0,0,(9)	SRR957843(8;7),SRR957844(5;3),
II	2793737	-	canonical	TTCTA(A*)C	A	2793727	-10	proximal	57	38	yes	yes	yes	5,4,(48)	5,3,(30)	3,0,(48)	3,0,(30)	SRR957844(21;15),SRR957843(36;23),
II	2811270	-	canonical	TGCTA(A*)C	A	2811256	-14	expected	22	17	yes	yes	yes	5,4,(13)	5,3,(9)	0,0,(13)	0,0,(9)	SRR957843(14;11),SRR957844(8;6),
II	2959790	-	canonical	AGTTA(A*)C	A	2959780	-10	proximal	4	3	yes	yes	yes	0,0,(4)	0,0,(3)	0,0,(4)	0,0,(3)	SRR957843(2;2),SRR957844(2;1),
II	2959936	-	canonical	TTCTA(A*)C	A	2959927	-9	proximal	1	1	yes	no	yes	0,0,(1)	0,0,(1)	0,0,(1)	0,0,(1)	SRR957844(1;1),
II	2960715	-	canonical	TGCTG(A*)C	A	2960702	-13	expected	9	9	yes	yes	yes	6,1,(2)	6,1,(2)	0,1,(2)	0,1,(2)	SRR957844(2;2),SRR957842(1;1),SRR957843(6;6),
II	2962423	-	canonical	TACTA(A*)C	A	2962409	-14	expected	18	15	yes	yes	yes	0,3,(15)	0,3,(12)	0,0,(15)	0,0,(12)	SRR957844(15;12),SRR957843(3;3),
II	3007196	-	canonical	TGCTG(A*)C	A	3007187	-9	proximal	5	3	no	yes	yes	5,0,(0)	3,0,(0)	0,0,(0)	0,0,(0)	SRR957843(2;2),SRR957844(3;1),
II	3030922	-	canonical	TACTA(A*)C	A	3030913	-9	proximal	1	1	yes	no	yes	0,0,(1)	0,0,(1)	0,0,(1)	0,0,(1)	SRR957843(1;1),
II	3054713	-	canonical	TCCTA(A*)C	A	3054703	-10	proximal	2	2	no	yes	yes	0,1,(1)	0,1,(1)	0,0,(0)	0,0,(0)	SRR957844(1;1),SRR957843(1;1),
II	3056274	-	canonical	AACTT(A*)C	A	3056264	-10	proximal	2	2	yes	no	yes	0,0,(2)	0,0,(2)	0,0,(2)	0,0,(2)	SRR957844(2;2),
II	3065044	-	canonical	TAGTA(A*)C	A	3065032	-12	expected	11	11	yes	yes	yes	0,3,(8)	0,3,(8)	0,0,(7)	0,0,(7)	SRR957843(5;5),SRR957844(6;6),
II	3105538	-	canonical	TATTA(A*)C	A	3105530	-8	proximal	6	6	no	yes	yes	1,2,(3)	1,2,(3)	0,0,(0)	0,0,(0)	SRR957844(2;2),SRR957843(3;3),SRR957841(1;1),
II	3111613	-	canonical	TGCTA(A*)C	A	3111600	-13	expected	1	1	yes	no	yes	0,0,(1)	0,0,(1)	0,0,(1)	0,0,(1)	SRR957844(1;1),
II	3115627	-	canonical	TTCTA(A*)C	A	3115615	-12	expected	3	3	yes	yes	yes	0,1,(2)	0,1,(2)	0,0,(2)	0,0,(2)	SRR957844(1;1),SRR957843(2;2),
II	3174660	-	canonical	TACTA(A*)C	A	3174650	-10	proximal	16	12	yes	yes	yes	0,1,(15)	0,1,(11)	0,0,(15)	0,0,(11)	SRR957841(1;1),SRR957843(6;6),SRR957844(9;5),
II	3218502	-	canonical	TACTA(A*)C	A	3218491	-11	expected	8	8	yes	yes	yes	1,0,(7)	1,0,(7)	0,0,(6)	0,0,(6)	SRR957843(7;7),SRR957844(1;1),
II	3227286	-	canonical	TACTA(A*)T	A	3227271	-15	expected	11	7	yes	yes	yes	0,4,(7)	0,3,(4)	0,0,(7)	0,0,(4)	SRR957844(3;2),SRR957843(8;5),
II	3252810	-	canonical	TGCTA(A*)C	A	3252799	-11	expected	3	3	yes	no	yes	0,0,(3)	0,0,(3)	0,0,(3)	0,0,(3)	SRR957843(3;3),
II	3253079	-	canonical	TGCTA(A*)T	A	3253067	-12	expected	3	2	no	yes	yes	3,0,(0)	2,0,(0)	0,0,(0)	0,0,(0)	SRR957841(2;1),SRR957844(1;1),
II	3282194	-	canonical	TACTA(A*)C	A	3282185	-9	proximal	1	1	yes	no	yes	0,0,(1)	0,0,(1)	0,0,(1)	0,0,(1)	SRR957843(1;1),
II	3309636	-	canonical	AGCTA(A*)C	A	3309627	-9	proximal	1	1	no	no	yes	1,0,(0)	1,0,(0)	0,0,(0)	0,0,(0)	SRR957844(1;1),
II	3309899	-	canonical	AACTA(A*)C	A	3309888	-11	expected	18	15	yes	yes	yes	1,3,(14)	1,2,(12)	0,1,(14)	0,1,(12)	SRR957843(12;9),SRR957844(6;6),
II	3332197	-	canonical	TACTA(A*)C	A	3332185	-12	expected	2	2	yes	no	yes	0,0,(2)	0,0,(2)	0,0,(2)	0,0,(2)	SRR957843(2;2),
II	3332642	-	canonical	TACTA(A*)C	A	3332627	-15	expected	2	2	no	yes	yes	1,0,(1)	1,0,(1)	0,0,(0)	0,0,(0)	SRR957844(2;2),
II	3385267	-	canonical	TATTA(A*)C	A	3385257	-10	proximal	89	49	yes	yes	yes	2,6,(81)	2,6,(41)	0,1,(74)	0,1,(35)	SRR957844(27;20),SRR957843(62;29),
II	3387035	-	canonical	AGCTA(A*)C	A	3387025	-10	proximal	5	4	yes	yes	yes	1,0,(4)	1,0,(3)	0,0,(4)	0,0,(3)	SRR957844(3;2),SRR957843(2;2),
II	3399477	-	canonical	TACTA(A*)C	A	3399466	-11	expected	27	20	yes	yes	yes	2,3,(22)	2,3,(15)	1,1,(22)	1,1,(15)	SRR957844(17;10),SRR957842(1;1),SRR957843(9;9),
II	3399769	-	canonical	TACTA(A*)T	A	3399755	-14	expected	4	3	yes	yes	yes	0,1,(3)	0,1,(2)	0,1,(3)	0,1,(2)	SRR957843(3;2),SRR957844(1;1),
II	3412403	-	canonical	TGCTG(A*)C	A	3412392	-11	expected	18	16	yes	yes	yes	11,3,(4)	10,2,(4)	0,2,(2)	0,1,(2)	SRR957844(8;6),SRR957843(10;10),
II	3433021	-	canonical	TGCTC(A*)C	A	3433005	-16	expected	9	8	yes	yes	yes	0,4,(5)	0,3,(5)	0,0,(2)	0,0,(2)	SRR957843(4;4),SRR957844(5;4),
II	3549795	-	canonical	AATTA(A*)C	A	3549786	-9	proximal	2	2	yes	yes	yes	0,0,(2)	0,0,(2)	0,0,(2)	0,0,(2)	SRR957844(1;1),SRR957843(1;1),
II	3550119	-	canonical	AACTA(A*)T	A	3550104	-15	expected	1	1	no	no	yes	1,0,(0)	1,0,(0)	0,0,(0)	0,0,(0)	SRR957842(1;1),
II	3583613	-	canonical	TACTA(A*)T	A	3583600	-13	expected	97	37	yes	yes	yes	6,5,(86)	5,4,(28)	0,1,(82)	0,1,(24)	SRR957843(50;20),SRR957844(47;17),
II	3610901	-	canonical	TATTA(A*)C	A	3610892	-9	proximal	5	5	yes	yes	yes	0,1,(4)	0,1,(4)	0,0,(4)	0,0,(4)	SRR957844(2;2),SRR957843(3;3),
II	3654290	-	canonical	TACTA(A*)C	A	3654283	-7	proximal	13	12	yes	yes	yes	2,0,(11)	2,0,(10)	1,0,(11)	1,0,(10)	SRR957843(8;7),SRR957844(5;5),
II	3661805	-	canonical	TGTTA(A*)C	A	3661791	-14	expected	7	5	yes	yes	yes	0,0,(7)	0,0,(5)	0,0,(7)	0,0,(5)	SRR957844(2;2),SRR957843(5;3),
II	3663216	-	canonical	TACTA(A*)C	A	3663206	-10	proximal	22	15	yes	yes	yes	0,4,(18)	0,3,(12)	0,0,(17)	0,0,(11)	SRR957843(15;10),SRR957844(7;5),
II	3665147	-	canonical	TATTA(A*)C	A	3665137	-10	proximal	3	2	yes	yes	yes	0,0,(3)	0,0,(2)	0,0,(3)	0,0,(2)	SRR957843(1;1),SRR957844(2;1),
II	3684936	-	canonical	TGCTA(A*)C	A	3684928	-8	proximal	28	25	yes	yes	yes	9,6,(13)	9,4,(12)	0,0,(13)	0,0,(12)	SRR957843(22;19),SRR957844(6;6),
II	3713249	-	canonical	TACTA(A*)T	A	3713237	-12	expected	104	78	yes	yes	yes	50,26,(28)	34,19,(25)	2,2,(8)	2,1,(8)	SRR957844(52;38),SRR957843(52;40),
II	3737153	-	canonical	TGCTA(A*)T	A	3737142	-11	expected	1	1	no	no	yes	0,0,(1)	0,0,(1)	0,0,(0)	0,0,(0)	SRR957843(1;1),
II	3761305	-	canonical	TACTA(A*)T	A	3761294	-11	expected	38	24	yes	yes	yes	3,0,(35)	3,0,(21)	0,0,(35)	0,0,(21)	SRR957843(22;14),SRR957844(16;10),
II	3788660	-	canonical	TACTA(A*)T	A	3788649	-11	expected	21	17	yes	yes	yes	2,4,(15)	2,4,(11)	0,1,(15)	0,1,(11)	SRR957844(5;5),SRR957843(16;12),
II	3874633	-	canonical	TACTA(A*)C	A	3874461	-172	distal	81	45	yes	yes	yes	10,5,(66)	6,5,(34)	4,1,(63)	2,1,(31)	SRR957843(59;29),SRR957844(22;16),
II	3924405	-	canonical	TACTG(A*)C	A	3924389	-16	expected	1	1	yes	no	yes	0,0,(1)	0,0,(1)	0,0,(1)	0,0,(1)	SRR957843(1;1),
II	3960707	-	canonical	CACTA(A*)C	A	3960696	-11	expected	10	8	yes	yes	yes	4,0,(6)	3,0,(5)	0,0,(6)	0,0,(5)	SRR957843(3;2),SRR957844(7;6),
II	3964588	-	canonical	TGCTA(A*)C	A	3964577	-11	expected	70	40	yes	yes	yes	10,1,(59)	8,1,(31)	1,0,(59)	1,0,(31)	SRR957843(42;23),SRR957844(28;17),
II	3965557	-	canonical	TACTG(A*)C	A	3965548	-9	proximal	11	9	yes	yes	yes	6,0,(5)	5,0,(4)	0,0,(3)	0,0,(3)	SRR957844(6;5),SRR957843(5;4),
II	4000866	-	canonical	TGCTA(A*)C	A	4000856	-10	proximal	3	3	yes	yes	yes	0,0,(3)	0,0,(3)	0,0,(3)	0,0,(3)	SRR957844(1;1),SRR957843(2;2),
II	4002401	-	canonical	TACTA(A*)T	A	4002392	-9	proximal	2	2	yes	no	yes	0,0,(2)	0,0,(2)	0,0,(2)	0,0,(2)	SRR957843(2;2),
II	4008830	-	canonical	TACTA(A*)C	A	4008819	-11	expected	1	1	no	no	yes	0,1,(0)	0,1,(0)	0,0,(0)	0,0,(0)	SRR957843(1;1),
II	4009188	-	canonical	TATTA(A*)C	A	4009176	-12	expected	31	13	yes	yes	yes	0,0,(31)	0,0,(13)	0,0,(29)	0,0,(11)	SRR957843(17;7),SRR957844(14;6),
II	4038648	-	canonical	TGCTA(A*)C	A	4038639	-9	proximal	2	2	yes	no	yes	0,0,(2)	0,0,(2)	0,0,(2)	0,0,(2)	SRR957843(2;2),
II	4086063	-	canonical	CACTA(A*)C	A	4086055	-8	proximal	1	1	no	no	yes	0,1,(0)	0,1,(0)	0,0,(0)	0,0,(0)	SRR957843(1;1),
II	4120428	-	canonical	TGCTA(A*)C	A	4120417	-11	expected	28	20	yes	yes	yes	2,4,(22)	2,4,(14)	1,0,(21)	1,0,(13)	SRR957843(10;10),SRR957844(18;10),
II	4125362	-	canonical	TACTA(A*)C	A	4125348	-14	expected	19	12	yes	yes	yes	2,1,(16)	2,1,(9)	0,0,(16)	0,0,(9)	SRR957843(9;6),SRR957844(10;6),
II	4128008	-	canonical	TACTA(A*)T	A	4127996	-12	expected	59	31	yes	yes	yes	1,4,(54)	1,4,(26)	0,1,(53)	0,1,(25)	SRR957843(29;14),SRR957844(30;17),
II	4128428	-	canonical	TACTA(A*)A	A	4128411	-17	expected	1	1	no	no	yes	1,0,(0)	1,0,(0)	0,0,(0)	0,0,(0)	SRR957843(1;1),
II	4138861	-	canonical	TATTA(A*)T	A	4138851	-10	proximal	27	20	yes	yes	yes	0,0,(27)	0,0,(20)	0,0,(25)	0,0,(18)	SRR957843(12;8),SRR957844(14;11),SRR957841(1;1),
II	4180092	-	canonical	TACTA(A*)C	A	4180082	-10	proximal	6	6	yes	yes	yes	1,0,(5)	1,0,(5)	0,0,(5)	0,0,(5)	SRR957844(2;2),SRR957843(4;4),
II	4221918	-	canonical	GGCTA(A*)C	A	4221906	-12	expected	353	116	yes	yes	yes	72,26,(255)	38,19,(59)	18,6,(250)	13,5,(56)	SRR957843(216;66),SRR957844(136;49),SRR957841(1;1),
II	4221973	-	canonical	TACTA(T*)C	T	4221906	-67	distal	2	2	yes	no	yes	0,0,(2)	0,0,(2)	0,0,(2)	0,0,(2)	SRR957843(2;2),
II	4222390	-	canonical	TATTA(A*)C	A	4222381	-9	proximal	15	12	yes	yes	yes	0,0,(15)	0,0,(12)	0,0,(13)	0,0,(10)	SRR957843(10;7),SRR957844(5;5),
II	4239047	-	canonical	TACTG(A*)C	A	4239038	-9	proximal	310	102	yes	yes	yes	144,6,(160)	33,5,(64)	1,4,(149)	1,3,(54)	SRR957841(1;1),SRR957844(96;40),SRR957843(213;61),
II	4241869	-	canonical	TACTA(A*)T	A	4241858	-11	expected	59	36	yes	yes	yes	2,3,(54)	2,3,(31)	0,1,(52)	0,1,(29)	SRR957844(19;12),SRR957843(40;24),
II	4261083	-	canonical	CACTA(A*)T	A	4261072	-11	expected	9	7	yes	yes	yes	0,2,(7)	0,1,(6)	0,0,(7)	0,0,(6)	SRR957843(1;1),SRR957844(8;6),
II	4300048	-	canonical	TGCTA(A*)C	A	4300036	-12	expected	4	4	yes	yes	yes	1,1,(2)	1,1,(2)	0,0,(2)	0,0,(2)	SRR957844(3;3),SRR957843(1;1),
II	4311355	-	canonical	AGCTA(A*)C	A	4311346	-9	proximal	1	1	yes	no	yes	0,0,(1)	0,0,(1)	0,0,(1)	0,0,(1)	SRR957843(1;1),
II	4331567	-	canonical	TACTA(A*)C	A	4331555	-12	expected	185	94	yes	yes	yes	16,28,(141)	16,21,(57)	7,3,(137)	7,3,(54)	SRR957841(4;2),SRR957843(90;46),SRR957842(1;1),SRR957844(90;45),
II	4332469	-	canonical	TACTA(A*)C	A	4332454	-15	expected	1	1	yes	no	yes	0,0,(1)	0,0,(1)	0,0,(1)	0,0,(1)	SRR957844(1;1),
II	4342931	-	canonical	TGCTA(A*)C	A	4342921	-10	proximal	393	168	yes	yes	yes	70,41,(282)	43,27,(98)	26,8,(276)	19,7,(92)	SRR957844(172;73),SRR957843(219;93),SRR957841(2;2),
II	4345110	-	canonical	TGCTA(A*)T	A	4345099	-11	expected	28	22	yes	yes	yes	4,0,(24)	3,0,(19)	0,0,(24)	0,0,(19)	SRR957844(13;11),SRR957843(15;11),
II	4374900	-	canonical	TACTA(A*)T	A	4374885	-15	expected	13	10	yes	yes	yes	3,0,(10)	3,0,(7)	0,0,(10)	0,0,(7)	SRR957843(3;3),SRR957844(10;7),
II	4384714	-	canonical	AGCTA(A*)C	A	4384704	-10	proximal	11	9	yes	yes	yes	0,0,(11)	0,0,(9)	0,0,(11)	0,0,(9)	SRR957844(8;7),SRR957843(3;2),
II	4386694	-	canonical	TACTA(A*)T	A	4386684	-10	proximal	58	31	yes	yes	yes	0,3,(55)	0,3,(28)	0,1,(53)	0,1,(26)	SRR957844(20;13),SRR957843(38;18),
II	4390840	-	canonical	TACTA(A*)C	A	4390826	-14	expected	1	1	yes	no	yes	0,0,(1)	0,0,(1)	0,0,(1)	0,0,(1)	SRR957844(1;1),
II	209912	+	canonical	TGTTA(A*)C	A	209921	-9	proximal	14	11	yes	yes	yes	1,2,(11)	1,2,(8)	0,1,(11)	0,1,(8)	SRR957844(3;3),SRR957843(11;8),
II	215595	+	canonical	TACTA(A*)T	A	215605	-10	proximal	23	20	yes	yes	yes	8,8,(7)	6,7,(7)	0,0,(3)	0,0,(3)	SRR957843(15;12),SRR957844(8;8),
II	224923	+	canonical	TTCTA(A*)C	A	224936	-13	expected	1	1	yes	no	yes	0,0,(1)	0,0,(1)	0,0,(1)	0,0,(1)	SRR957844(1;1),
II	225284	+	canonical	TGCTA(A*)T	A	225298	-14	expected	30	28	yes	yes	yes	4,1,(25)	4,1,(23)	0,1,(23)	0,1,(21)	SRR957843(19;18),SRR957844(11;10),
II	230602	+	canonical	TATTA(A*)C	A	230615	-13	expected	401	114	yes	yes	yes	2,23,(376)	2,20,(92)	2,6,(367)	2,6,(84)	SRR957843(238;61),SRR957844(163;53),
II	231485	+	canonical	TGCTA(A*)C	A	231496	-11	expected	22	20	yes	yes	yes	4,3,(15)	4,2,(14)	0,0,(15)	0,0,(14)	SRR957844(8;7),SRR957843(14;13),
II	231719	+	canonical	GGCTA(A*)C	A	231736	-17	expected	248	115	yes	yes	yes	39,19,(190)	25,13,(77)	18,0,(167)	12,0,(60)	SRR957841(6;6),SRR957844(95;47),SRR957843(140;57),SRR957842(7;5),
II	253337	+	canonical	CATTA(A*)C	A	265604	-12267	distal	8	4	yes	yes	yes	2,1,(5)	1,1,(2)	0,0,(5)	0,0,(2)	SRR957843(6;3),SRR957844(2;1),
II	267957	+	canonical	TTTTA(A*)C	A	267967	-10	proximal	6	6	yes	yes	yes	0,1,(5)	0,1,(5)	0,1,(5)	0,1,(5)	SRR957844(2;2),SRR957843(4;4),
II	365756	+	canonical	TACTA(A*)T	A	365765	-9	proximal	31	19	yes	yes	yes	1,3,(27)	1,3,(15)	0,1,(26)	0,1,(14)	SRR957843(21;11),SRR957844(10;8),
II	407043	+	canonical	TTCTA(A*)C	A	407055	-12	expected	1	1	no	no	yes	1,0,(0)	1,0,(0)	0,0,(0)	0,0,(0)	SRR957844(1;1),
II	410134	+	canonical	TGTTA(A*)C	A	410146	-12	expected	9	8	yes	yes	yes	0,0,(9)	0,0,(8)	0,0,(9)	0,0,(8)	SRR957844(5;5),SRR957843(4;3),
II	413878	+	canonical	TGCTA(A*)C	A	413893	-15	expected	99	53	yes	yes	yes	9,7,(83)	9,5,(39)	7,1,(80)	7,1,(36)	SRR957844(44;22),SRR957843(55;31),
II	419398	+	canonical	TGCTT(A*)C	A	419410	-12	expected	17	12	yes	yes	yes	1,2,(14)	1,2,(9)	0,0,(12)	0,0,(7)	SRR957843(9;7),SRR957844(8;5),
II	420649	+	canonical	TACTA(A*)C	A	420661	-12	expected	1	1	no	no	yes	0,0,(1)	0,0,(1)	0,0,(0)	0,0,(0)	SRR957844(1;1),
II	435271	+	canonical	TACTA(A*)T	A	435282	-11	expected	11	10	yes	yes	yes	0,2,(9)	0,2,(8)	0,0,(9)	0,0,(8)	SRR957841(1;1),SRR957843(7;7),SRR957844(3;2),
II	499540	+	canonical	TACTA(A*)C	A	499555	-15	expected	21	17	yes	yes	yes	1,3,(17)	1,3,(13)	0,0,(17)	0,0,(13)	SRR957843(11;10),SRR957844(10;7),
II	501673	+	canonical	TATTA(A*)C	A	501684	-11	expected	6	4	yes	no	yes	0,0,(6)	0,0,(4)	0,0,(5)	0,0,(3)	SRR957843(6;4),
II	514712	+	canonical	TACTA(A*)C	A	514723	-11	expected	5	4	yes	yes	yes	2,0,(3)	1,0,(3)	0,0,(3)	0,0,(3)	SRR957843(3;3),SRR957844(2;1),
II	516717	+	canonical	TATTA(A*)C	A	516726	-9	proximal	1	1	yes	no	yes	0,0,(1)	0,0,(1)	0,0,(1)	0,0,(1)	SRR957843(1;1),
II	517672	+	canonical	TGCTA(A*)C	A	517684	-12	expected	284	90	yes	yes	yes	26,27,(231)	17,17,(56)	3,2,(229)	3,1,(54)	SRR957844(121;41),SRR957843(161;47),SRR957842(2;2),
II	535620	+	canonical	TTCTA(A*)C	A	535631	-11	expected	499	207	yes	yes	yes	47,87,(365)	36,55,(116)	37,30,(331)	27,22,(89)	SRR957844(219;83),SRR957842(1;1),SRR957843(279;123),
II	539901	+	canonical	TACTA(A*)C	A	539914	-13	expected	24	20	yes	yes	yes	5,11,(8)	5,8,(7)	0,0,(4)	0,0,(4)	SRR957844(11;9),SRR957843(13;11),
II	556388	+	canonical	TGTTA(A*)C	A	556398	-10	proximal	6	6	yes	yes	yes	1,1,(4)	1,1,(4)	0,0,(4)	0,0,(4)	SRR957844(1;1),SRR957843(5;5),
II	556824	+	canonical	TACTA(A*)C	A	556845	-21	expected	9	9	yes	yes	yes	2,0,(7)	2,0,(7)	0,0,(7)	0,0,(7)	SRR957844(5;5),SRR957843(4;4),
II	578714	+	canonical	TACTA(A*)C	A	578724	-10	proximal	111	67	yes	yes	yes	11,10,(90)	9,9,(49)	7,1,(88)	5,1,(47)	SRR957844(62;34),SRR957843(49;33),
II	628529	+	canonical	TTCTA(A*)C	A	628537	-8	proximal	71	57	yes	yes	yes	11,11,(49)	8,11,(38)	6,3,(46)	5,3,(35)	SRR957843(36;29),SRR957844(35;28),
II	644535	+	canonical	TTTTA(A*)C	A	644546	-11	expected	2	1	yes	no	yes	0,0,(2)	0,0,(1)	0,0,(2)	0,0,(1)	SRR957844(2;1),
II	725670	+	canonical	GACTA(A*)C	A	725682	-12	expected	2	2	yes	yes	yes	1,0,(1)	1,0,(1)	0,0,(1)	0,0,(1)	SRR957843(2;2),
II	731470	+	canonical	TACTA(A*)C	A	731478	-8	proximal	4	4	yes	yes	yes	0,1,(3)	0,1,(3)	0,0,(3)	0,0,(3)	SRR957843(3;3),SRR957844(1;1),
II	731620	+	canonical	TACTA(A*)C	A	731632	-12	expected	21	13	yes	yes	yes	2,0,(19)	1,0,(12)	0,0,(19)	0,0,(12)	SRR957844(17;10),SRR957843(4;3),
II	735370	+	canonical	TAGTA(A*)C	A	735383	-13	expected	209	84	yes	yes	yes	0,89,(120)	0,35,(49)	0,5,(115)	0,5,(44)	SRR957844(88;43),SRR957843(121;41),
II	754771	+	canonical	GACTA(A*)T	A	754783	-12	expected	531	99	yes	yes	yes	17,17,(497)	13,15,(71)	4,2,(483)	3,2,(60)	SRR957844(213;42),SRR957843(318;57),
II	755135	+	canonical	AGCTA(A*)C	A	755149	-14	expected	119	68	yes	yes	yes	39,10,(70)	25,10,(33)	6,3,(68)	5,3,(31)	SRR957844(52;31),SRR957843(67;37),
II	765261	+	canonical	TTCTA(A*)C	A	765270	-9	proximal	12	11	yes	yes	yes	4,0,(8)	4,0,(7)	0,0,(7)	0,0,(6)	SRR957843(7;7),SRR957844(5;4),
II	771744	+	canonical	TGCTA(A*)C	A	771755	-11	expected	1	1	no	no	yes	1,0,(0)	1,0,(0)	0,0,(0)	0,0,(0)	SRR957843(1;1),
II	771973	+	canonical	TACTC(A*)C	A	771985	-12	expected	21	17	yes	yes	yes	1,6,(14)	1,4,(12)	0,0,(13)	0,0,(11)	SRR957843(12;9),SRR957844(9;8),
II	774572	+	canonical	TACTA(A*)C	A	774580	-8	proximal	3	3	yes	no	yes	0,0,(3)	0,0,(3)	0,0,(3)	0,0,(3)	SRR957843(3;3),
II	793482	+	canonical	TGCTA(A*)C	A	793548	-66	distal	34	30	yes	yes	yes	6,4,(24)	6,4,(20)	3,0,(22)	3,0,(18)	SRR957843(20;18),SRR957844(14;12),
II	824864	+	canonical	AACTA(A*)C	A	824873	-9	proximal	10	10	yes	yes	yes	3,0,(7)	3,0,(7)	2,0,(6)	2,0,(6)	SRR957843(4;4),SRR957844(6;6),
II	848246	+	canonical	TACTA(A*)T	A	848262	-16	expected	38	24	yes	yes	yes	1,4,(33)	1,4,(19)	0,1,(33)	0,1,(19)	SRR957844(11;9),SRR957843(27;15),
II	951395	+	canonical	CACTA(A*)C	A	967865	-16470	distal	1	1	yes	no	yes	0,0,(1)	0,0,(1)	0,0,(1)	0,0,(1)	SRR957843(1;1),
II	967856	+	canonical	GACTG(A*)T	A	967865	-9	proximal	2	2	yes	yes	yes	1,0,(1)	1,0,(1)	0,0,(1)	0,0,(1)	SRR957843(1;1),SRR957844(1;1),
II	1052213	+	canonical	AACTA(A*)T	A	1052338	-125	distal	1	1	yes	no	yes	0,0,(1)	0,0,(1)	0,0,(1)	0,0,(1)	SRR957844(1;1),
II	1052331	+	canonical	AACTA(A*)C	A	1052338	-7	proximal	6	5	yes	yes	yes	0,2,(4)	0,2,(3)	0,1,(4)	0,1,(3)	SRR957844(1;1),SRR957843(5;4),
II	1086081	+	canonical	TTCTA(A*)C	A	1086094	-13	expected	1	1	yes	no	yes	0,0,(1)	0,0,(1)	0,0,(1)	0,0,(1)	SRR957843(1;1),
II	1109119	+	canonical	TATTG(A*)C	A	1109134	-15	expected	1	1	yes	no	yes	0,0,(1)	0,0,(1)	0,0,(1)	0,0,(1)	SRR957844(1;1),
II	1123373	+	canonical	TACTA(A*)C	A	1123384	-11	expected	2	2	yes	yes	yes	1,1,(0)	1,1,(0)	0,1,(0)	0,1,(0)	SRR957843(2;2),
II	1123588	+	canonical	TGCTA(A*)C	A	1123600	-12	expected	1	1	yes	no	yes	0,0,(1)	0,0,(1)	0,0,(1)	0,0,(1)	SRR957844(1;1),
II	1132726	+	canonical	TACTA(A*)C	A	1132740	-14	expected	7	5	yes	yes	yes	1,2,(4)	1,1,(3)	0,0,(4)	0,0,(3)	SRR957843(5;4),SRR957844(2;1),
II	1135052	+	canonical	TATTA(A*)C	A	1135065	-13	expected	7	6	yes	yes	yes	0,0,(7)	0,0,(6)	0,0,(7)	0,0,(6)	SRR957844(6;5),SRR957843(1;1),
II	1138355	+	canonical	TGTTG(A*)C	A	1138367	-12	expected	1	1	yes	no	yes	0,0,(1)	0,0,(1)	0,0,(1)	0,0,(1)	SRR957843(1;1),
II	1140279	+	canonical	TGCTT(A*)T	A	1140371	-92	distal	1	1	no	no	yes	0,1,(0)	0,1,(0)	0,0,(0)	0,0,(0)	SRR957843(1;1),
II	1142476	+	canonical	TACTA(A*)C	A	1142495	-19	expected	19	14	yes	yes	yes	0,1,(18)	0,1,(13)	0,0,(18)	0,0,(13)	SRR957844(9;5),SRR957843(10;9),
II	1164828	+	canonical	TACTA(A*)C	A	1164841	-13	expected	3	3	yes	yes	yes	0,0,(3)	0,0,(3)	0,0,(3)	0,0,(3)	SRR957844(1;1),SRR957843(1;1),SRR957842(1;1),
II	1165793	+	canonical	TTCTA(A*)T	A	1165809	-16	expected	2	2	yes	yes	yes	0,0,(2)	0,0,(2)	0,0,(2)	0,0,(2)	SRR957843(1;1),SRR957844(1;1),
II	1168049	+	canonical	TATTA(A*)C	A	1168061	-12	expected	85	39	yes	yes	yes	0,1,(84)	0,1,(38)	0,0,(78)	0,0,(32)	SRR957844(22;12),SRR957843(63;27),
II	1224945	+	canonical	CGCTA(A*)T	A	1224952	-7	proximal	2	2	no	yes	yes	2,0,(0)	2,0,(0)	0,0,(0)	0,0,(0)	SRR957843(1;1),SRR957844(1;1),
II	1225955	+	canonical	TGCTG(A*)C	A	1225968	-13	expected	4	4	yes	yes	yes	3,0,(1)	3,0,(1)	0,0,(1)	0,0,(1)	SRR957843(3;3),SRR957844(1;1),
II	1233675	+	canonical	TACTA(A*)C	A	1233687	-12	expected	27	21	yes	yes	yes	6,9,(12)	4,7,(10)	1,0,(11)	1,0,(9)	SRR957843(15;12),SRR957844(12;9),
II	1248679	+	canonical	TTCTA(A*)C	A	1248691	-12	expected	3	2	yes	yes	yes	1,0,(2)	1,0,(1)	0,0,(2)	0,0,(1)	SRR957844(3;2),
II	1274634	+	canonical	TACTA(A*)C	A	1274647	-13	expected	2	2	yes	yes	yes	1,0,(1)	1,0,(1)	0,0,(1)	0,0,(1)	SRR957843(1;1),SRR957844(1;1),
II	1279021	+	canonical	TACTA(A*)C	A	1279031	-10	proximal	5	5	yes	yes	yes	1,1,(3)	1,1,(3)	1,0,(3)	1,0,(3)	SRR957844(2;2),SRR957843(3;3),
II	1334597	+	canonical	AGCTA(A*)C	A	1334606	-9	proximal	23	19	yes	yes	yes	14,2,(7)	11,2,(6)	6,0,(5)	4,0,(4)	SRR957843(15;12),SRR957844(8;7),
II	1348487	+	canonical	TACTT(A*)C	A	1348503	-16	expected	62	39	yes	yes	yes	0,8,(54)	0,6,(33)	0,0,(52)	0,0,(31)	SRR957843(22;16),SRR957844(40;23),
II	1359471	+	canonical	TACTA(A*)C	A	1359482	-11	expected	17	15	yes	yes	yes	5,2,(10)	3,2,(10)	3,0,(10)	2,0,(10)	SRR957843(8;8),SRR957844(9;7),
II	1416709	+	canonical	TACTA(A*)T	A	1416719	-10	proximal	8	6	yes	yes	yes	0,0,(8)	0,0,(6)	0,0,(7)	0,0,(5)	SRR957844(2;2),SRR957843(6;4),
II	1420736	+	canonical	TGCTA(A*)T	A	1420751	-15	expected	1	1	yes	no	yes	0,0,(1)	0,0,(1)	0,0,(1)	0,0,(1)	SRR957843(1;1),
II	1444751	+	canonical	TACTA(A*)C	A	1444777	-26	expected	2	1	yes	no	yes	0,0,(2)	0,0,(1)	0,0,(2)	0,0,(1)	SRR957844(2;1),
II	1445004	+	canonical	TACTA(A*)C	A	1445020	-16	expected	5	5	yes	yes	yes	3,0,(2)	3,0,(2)	0,0,(2)	0,0,(2)	SRR957843(3;3),SRR957844(2;2),
II	1445457	+	canonical	GGCTA(A*)C	A	1445473	-16	expected	613	152	yes	yes	yes	46,68,(499)	25,33,(94)	34,3,(472)	17,2,(75)	SRR957844(320;72),SRR957842(1;1),SRR957843(291;78),SRR957841(1;1),
II	1460728	+	canonical	TTCTC(A*)T	A	1460761	-33	expected	1	1	no	no	yes	0,0,(1)	0,0,(1)	0,0,(0)	0,0,(0)	SRR957844(1;1),
II	1471060	+	canonical	TACTA(A*)A	A	1471075	-15	expected	1	1	no	no	yes	0,1,(0)	0,1,(0)	0,0,(0)	0,0,(0)	SRR957844(1;1),
II	1500434	+	canonical	TACTG(A*)C	A	1500444	-10	proximal	1	1	no	no	yes	1,0,(0)	1,0,(0)	0,0,(0)	0,0,(0)	SRR957844(1;1),
II	1500673	+	canonical	TTCTA(A*)C	A	1500685	-12	expected	1	1	yes	no	yes	0,0,(1)	0,0,(1)	0,0,(1)	0,0,(1)	SRR957843(1;1),
II	1501079	+	canonical	CGCTA(A*)C	A	1501087	-8	proximal	227	109	yes	yes	yes	30,36,(161)	22,25,(62)	23,12,(155)	16,11,(56)	SRR957843(152;69),SRR957844(75;40),
II	1513324	+	canonical	TACTA(A*)C	A	1513333	-9	proximal	16	12	yes	yes	yes	2,3,(11)	2,1,(9)	0,0,(11)	0,0,(9)	SRR957844(10;6),SRR957843(6;6),
II	1524140	+	canonical	AACTA(A*)T	A	1524156	-16	expected	50	28	yes	yes	yes	0,5,(45)	0,5,(23)	0,1,(43)	0,1,(21)	SRR957843(26;14),SRR957844(24;14),
II	1529367	+	canonical	TTCTA(A*)C	A	1529376	-9	proximal	1	1	no	no	yes	0,0,(1)	0,0,(1)	0,0,(0)	0,0,(0)	SRR957843(1;1),
II	1538077	+	canonical	TATTG(A*)C	A	1538087	-10	proximal	2	2	yes	yes	yes	0,0,(2)	0,0,(2)	0,0,(2)	0,0,(2)	SRR957844(1;1),SRR957843(1;1),
II	1547308	+	canonical	AACTA(A*)T	A	1547319	-11	expected	7	7	yes	yes	yes	0,0,(7)	0,0,(7)	0,0,(7)	0,0,(7)	SRR957844(3;3),SRR957843(4;4),
II	1591644	+	canonical	AGCTA(A*)C	A	1591654	-10	proximal	15	14	yes	yes	yes	2,0,(13)	2,0,(12)	1,0,(13)	1,0,(12)	SRR957844(5;5),SRR957843(10;9),
II	1656237	+	canonical	TACTA(A*)C	A	1656249	-12	expected	33	24	yes	yes	yes	3,4,(26)	3,2,(19)	1,0,(26)	1,0,(19)	SRR957843(18;15),SRR957844(15;9),
II	1690477	+	canonical	GACTA(A*)T	A	1690487	-10	proximal	6	5	yes	yes	yes	2,0,(4)	2,0,(3)	0,0,(3)	0,0,(2)	SRR957843(6;5),
II	1695912	+	canonical	TGTTA(A*)C	A	1695923	-11	expected	58	33	yes	yes	yes	3,6,(49)	3,5,(25)	0,0,(47)	0,0,(23)	SRR957843(23;16),SRR957844(35;17),
II	1700483	+	canonical	TACTA(A*)T	A	1700497	-14	expected	40	18	yes	yes	yes	5,2,(33)	4,2,(12)	0,0,(33)	0,0,(12)	SRR957843(17;8),SRR957844(23;10),
II	1707756	+	canonical	TACTA(A*)C	A	1707763	-7	proximal	235	85	yes	yes	yes	8,28,(199)	8,23,(54)	2,5,(192)	2,5,(49)	SRR957843(145;56),SRR957844(90;29),
II	1714240	+	canonical	TCCTA(A*)C	A	1714256	-16	expected	2	2	yes	yes	yes	0,0,(2)	0,0,(2)	0,0,(2)	0,0,(2)	SRR957843(1;1),SRR957844(1;1),
II	1758290	+	canonical	TACTA(A*)C	A	1758301	-11	expected	3	1	yes	no	yes	0,0,(3)	0,0,(1)	0,0,(3)	0,0,(1)	SRR957844(3;1),
II	1761166	+	canonical	TACTA(A*)C	A	1761183	-17	expected	60	41	yes	yes	yes	5,16,(39)	5,11,(25)	3,0,(35)	3,0,(21)	SRR957844(21;15),SRR957843(39;26),
II	1794479	+	canonical	TACTA(A*)T	A	1794492	-13	expected	255	104	yes	yes	yes	29,26,(200)	22,21,(61)	2,7,(185)	2,6,(48)	SRR957844(99;40),SRR957843(155;63),SRR957841(1;1),
II	1825273	+	canonical	TACTA(A*)C	A	1825283	-10	proximal	5	5	yes	yes	yes	1,0,(4)	1,0,(4)	0,0,(4)	0,0,(4)	SRR957843(4;4),SRR957844(1;1),
II	1831617	+	canonical	TGCTA(A*)C	A	1831627	-10	proximal	85	57	yes	yes	yes	21,5,(59)	16,5,(36)	3,1,(58)	3,1,(35)	SRR957843(45;32),SRR957844(40;25),
II	1839834	+	canonical	TACTA(A*)C	A	1839846	-12	expected	93	50	yes	yes	yes	6,9,(78)	5,6,(39)	1,4,(77)	1,2,(38)	SRR957843(51;26),SRR957844(42;24),
II	1840027	+	canonical	TACTA(A*)T	A	1840044	-17	expected	95	42	yes	yes	yes	2,4,(89)	2,4,(36)	0,2,(87)	0,2,(34)	SRR957844(37;18),SRR957842(1;1),SRR957843(57;23),
II	1872259	+	canonical	GACTA(A*)C	A	1872281	-22	expected	2	1	yes	no	yes	0,0,(2)	0,0,(1)	0,0,(2)	0,0,(1)	SRR957844(2;1),
II	1893503	+	canonical	TACTC(A*)C	A	1893514	-11	expected	4	4	yes	yes	yes	0,0,(4)	0,0,(4)	0,0,(3)	0,0,(3)	SRR957844(1;1),SRR957843(3;3),
II	1906114	+	canonical	AATTA(A*)C	A	1906383	-269	distal	4	3	yes	yes	yes	0,0,(4)	0,0,(3)	0,0,(4)	0,0,(3)	SRR957844(1;1),SRR957843(3;2),
II	1910302	+	canonical	TACTA(A*)C	A	1910316	-14	expected	15	11	yes	yes	yes	2,1,(12)	2,1,(8)	0,1,(12)	0,1,(8)	SRR957844(9;6),SRR957843(6;5),
II	1921849	+	canonical	AGCTG(A*)C	A	1921864	-15	expected	1	1	no	no	yes	1,0,(0)	1,0,(0)	0,0,(0)	0,0,(0)	SRR957843(1;1),
II	2000154	+	canonical	CATTA(A*)C	A	2000165	-11	expected	3	3	yes	yes	yes	0,0,(3)	0,0,(3)	0,0,(3)	0,0,(3)	SRR957843(1;1),SRR957844(2;2),
II	2004201	+	canonical	TACTA(A*)T	A	2004214	-13	expected	1	1	no	no	yes	1,0,(0)	1,0,(0)	0,0,(0)	0,0,(0)	SRR957843(1;1),
II	2024047	+	canonical	CACTA(A*)C	A	2024058	-11	expected	2	2	no	yes	yes	1,1,(0)	1,1,(0)	0,0,(0)	0,0,(0)	SRR957843(2;2),
II	2073456	+	canonical	CATTA(A*)C	A	2073466	-10	proximal	163	67	yes	yes	yes	11,25,(127)	7,14,(46)	0,4,(120)	0,2,(40)	SRR957844(94;36),SRR957843(69;31),
II	2100959	+	canonical	TACTT(A*)C	A	2100968	-9	proximal	1	1	yes	no	yes	0,0,(1)	0,0,(1)	0,0,(1)	0,0,(1)	SRR957843(1;1),
II	2105861	+	canonical	AACTA(A*)C	A	2105871	-10	proximal	8	8	yes	yes	yes	2,0,(6)	2,0,(6)	0,0,(6)	0,0,(6)	SRR957843(5;5),SRR957844(3;3),
II	2140003	+	canonical	TATTA(A*)T	A	2140016	-13	expected	2	2	yes	no	yes	0,0,(2)	0,0,(2)	0,0,(2)	0,0,(2)	SRR957844(2;2),
II	2181067	+	canonical	AGCTA(A*)C	A	2181080	-13	expected	31	16	yes	yes	yes	5,1,(25)	4,1,(11)	1,0,(25)	1,0,(11)	SRR957843(16;8),SRR957844(15;8),
II	2210801	+	canonical	GACTA(A*)C	A	2210811	-10	proximal	138	56	yes	yes	yes	124,7,(7)	44,7,(5)	113,6,(6)	35,6,(4)	SRR957843(105;35),SRR957844(33;21),
II	2211074	+	canonical	TATTA(A*)C	A	2211085	-11	expected	145	43	yes	yes	yes	1,12,(132)	1,7,(35)	0,1,(126)	0,1,(30)	SRR957842(1;1),SRR957843(69;22),SRR957844(75;20),
II	2239346	+	canonical	TTCTA(A*)T	A	2239361	-15	expected	18	8	yes	yes	yes	0,0,(18)	0,0,(8)	0,0,(17)	0,0,(7)	SRR957844(3;2),SRR957843(15;6),
II	2240426	+	canonical	TATTA(A*)C	A	2240436	-10	proximal	20	14	yes	yes	yes	0,1,(19)	0,1,(13)	0,1,(18)	0,1,(12)	SRR957844(9;6),SRR957843(11;8),
II	2274594	+	canonical	TACTA(A*)T	A	2274609	-15	expected	144	54	yes	yes	yes	1,7,(136)	1,5,(48)	0,2,(133)	0,2,(45)	SRR957843(89;29),SRR957842(1;1),SRR957844(54;24),
II	2284513	+	canonical	CGCTA(A*)C	A	2284524	-11	expected	16	14	yes	yes	yes	3,0,(13)	3,0,(11)	0,0,(13)	0,0,(11)	SRR957843(7;7),SRR957844(9;7),
II	2287436	+	canonical	TGCTA(A*)C	A	2287449	-13	expected	36	25	yes	yes	yes	4,7,(25)	4,5,(16)	1,0,(23)	1,0,(14)	SRR957844(17;10),SRR957843(19;15),
II	2291879	+	canonical	TACTA(A*)T	A	2291889	-10	proximal	21	16	yes	yes	yes	2,0,(19)	2,0,(14)	0,0,(19)	0,0,(14)	SRR957843(13;9),SRR957844(8;7),
II	2295309	+	canonical	TATTA(A*)C	A	2295323	-14	expected	2	2	yes	yes	yes	0,0,(2)	0,0,(2)	0,0,(2)	0,0,(2)	SRR957844(1;1),SRR957843(1;1),
II	2316758	+	canonical	TGCTG(A*)T	A	2316769	-11	expected	1	1	yes	no	yes	0,0,(1)	0,0,(1)	0,0,(1)	0,0,(1)	SRR957843(1;1),
II	2320536	+	canonical	CACTA(A*)C	A	2320546	-10	proximal	1	1	yes	no	yes	0,0,(1)	0,0,(1)	0,0,(1)	0,0,(1)	SRR957843(1;1),
II	2325223	+	canonical	TATTA(A*)T	A	2325233	-10	proximal	73	34	yes	yes	yes	0,3,(70)	0,2,(32)	0,3,(67)	0,2,(30)	SRR957844(28;15),SRR957843(44;18),SRR957842(1;1),
II	2325229	+	canonical	TACTT(A*)T	A	2325233	-4	proximal	1	1	yes	no	yes	0,0,(1)	0,0,(1)	0,0,(1)	0,0,(1)	SRR957843(1;1),
II	2348270	+	canonical	TTCTG(A*)C	A	2348279	-9	proximal	2	2	yes	no	yes	0,0,(2)	0,0,(2)	0,0,(2)	0,0,(2)	SRR957843(2;2),
II	2357999	+	canonical	TGCTA(A*)C	A	2358012	-13	expected	16	15	yes	yes	yes	2,2,(12)	2,2,(11)	0,1,(12)	0,1,(11)	SRR957843(9;8),SRR957844(7;7),
II	2359829	+	canonical	TATTA(A*)C	A	2359844	-15	expected	3	3	yes	no	yes	0,0,(3)	0,0,(3)	0,0,(3)	0,0,(3)	SRR957843(3;3),
II	2382652	+	canonical	TACTG(A*)T	A	2382662	-10	proximal	5	5	no	yes	yes	5,0,(0)	5,0,(0)	0,0,(0)	0,0,(0)	SRR957844(2;2),SRR957843(3;3),
II	2383016	+	canonical	TGCTA(A*)T	A	2383027	-11	expected	87	39	yes	yes	yes	2,1,(84)	2,1,(36)	0,1,(82)	0,1,(34)	SRR957843(51;22),SRR957844(36;17),
II	2393775	+	canonical	AACTG(A*)C	A	2393793	-18	expected	1	1	yes	no	yes	0,0,(1)	0,0,(1)	0,0,(1)	0,0,(1)	SRR957844(1;1),
II	2426773	+	canonical	TGCTA(A*)T	A	2426784	-11	expected	133	58	yes	yes	yes	15,16,(102)	12,10,(36)	2,2,(96)	2,2,(32)	SRR957843(73;32),SRR957844(60;26),
II	2439627	+	canonical	TATTA(A*)C	A	2439645	-18	expected	7	5	yes	yes	yes	0,1,(6)	0,1,(4)	0,1,(5)	0,1,(3)	SRR957844(1;1),SRR957843(6;4),
II	2452306	+	canonical	TACTA(A*)T	A	2452318	-12	expected	10	10	yes	yes	yes	1,0,(9)	1,0,(9)	0,0,(9)	0,0,(9)	SRR957844(6;6),SRR957843(4;4),
II	2492206	+	canonical	TACTA(A*)C	A	2492219	-13	expected	54	38	yes	yes	yes	18,4,(32)	13,3,(22)	1,1,(30)	1,1,(20)	SRR957844(22;16),SRR957843(31;21),SRR957842(1;1),
II	2567066	+	canonical	TACTA(A*)C	A	2567075	-9	proximal	5	5	yes	yes	yes	1,0,(4)	1,0,(4)	0,0,(3)	0,0,(3)	SRR957844(2;2),SRR957843(3;3),
II	2602702	+	canonical	TGCTA(A*)C	A	2602712	-10	proximal	4	3	yes	yes	yes	3,0,(1)	2,0,(1)	2,0,(1)	1,0,(1)	SRR957843(2;2),SRR957844(2;1),
II	2685991	+	canonical	TACTA(A*)C	A	2686005	-14	expected	2	2	yes	yes	yes	0,1,(1)	0,1,(1)	0,0,(1)	0,0,(1)	SRR957843(2;2),
II	2691187	+	canonical	TACTA(A*)T	A	2691196	-9	proximal	296	80	yes	yes	yes	7,12,(277)	6,12,(62)	0,7,(268)	0,7,(55)	SRR957844(108;32),SRR957842(1;1),SRR957843(185;45),SRR957841(2;2),
II	2756160	+	canonical	TACTC(A*)C	A	2756171	-11	expected	20	15	yes	yes	yes	0,12,(8)	0,9,(6)	0,0,(4)	0,0,(4)	SRR957843(13;9),SRR957844(7;6),
II	2774209	+	canonical	TACTA(A*)C	A	2774222	-13	expected	2	2	yes	no	yes	2,0,(0)	2,0,(0)	1,0,(0)	1,0,(0)	SRR957843(2;2),
II	2778210	+	canonical	AGCTA(A*)C	A	2778225	-15	expected	7	7	yes	yes	yes	0,1,(6)	0,1,(6)	0,0,(6)	0,0,(6)	SRR957844(4;4),SRR957843(3;3),
II	2921431	+	canonical	TTCTA(A*)C	A	2921440	-9	proximal	19	14	yes	yes	yes	1,2,(16)	1,2,(11)	0,0,(15)	0,0,(10)	SRR957843(12;11),SRR957844(7;3),
II	2921630	+	canonical	TACTA(G*)C	G	2921643	-13	expected	1	1	yes	no	yes	1,0,(0)	1,0,(0)	1,0,(0)	1,0,(0)	SRR957842(1;1),
II	2924222	+	canonical	AACTA(A*)C	A	2924232	-10	proximal	8	8	yes	yes	yes	1,3,(4)	1,3,(4)	1,0,(3)	1,0,(3)	SRR957843(1;1),SRR957844(7;7),
II	2928545	+	canonical	TATTA(A*)C	A	2928558	-13	expected	2	2	yes	yes	yes	0,1,(1)	0,1,(1)	0,0,(1)	0,0,(1)	SRR957843(2;2),
II	2933695	+	canonical	GGCTA(A*)T	A	2933709	-14	expected	315	99	yes	yes	yes	10,72,(233)	8,26,(65)	3,0,(194)	2,0,(42)	SRR957844(142;42),SRR957843(173;57),
II	2935420	+	canonical	TGCTA(A*)C	A	2935430	-10	proximal	34	27	yes	yes	yes	13,4,(17)	10,4,(13)	2,1,(15)	2,1,(11)	SRR957843(15;13),SRR957844(19;14),
II	2960606	+	canonical	TGCTA(A*)A	A	2960619	-13	expected	1	1	no	no	yes	1,0,(0)	1,0,(0)	0,0,(0)	0,0,(0)	SRR957844(1;1),
II	3022626	+	canonical	TACTG(A*)C	A	3022636	-10	proximal	21	18	yes	yes	yes	8,0,(13)	7,0,(11)	1,0,(12)	1,0,(10)	SRR957844(11;11),SRR957843(10;7),
II	3061204	+	canonical	TACTA(A*)C	A	3061218	-14	expected	6	6	yes	yes	yes	0,0,(6)	0,0,(6)	0,0,(6)	0,0,(6)	SRR957844(3;3),SRR957843(3;3),
II	3110569	+	canonical	TTCTA(A*)C	A	3110579	-10	proximal	80	58	yes	yes	yes	4,9,(67)	4,9,(45)	2,3,(63)	2,3,(41)	SRR957844(40;30),SRR957843(40;28),
II	3200308	+	canonical	AACTA(A*)C	A	3200322	-14	expected	1	1	yes	no	yes	0,0,(1)	0,0,(1)	0,0,(1)	0,0,(1)	SRR957843(1;1),
II	3200478	+	canonical	AACTA(A*)C	A	3200492	-14	expected	1	1	yes	no	yes	0,0,(1)	0,0,(1)	0,0,(1)	0,0,(1)	SRR957844(1;1),
II	3219855	+	canonical	TACTA(A*)T	A	3219868	-13	expected	7	7	yes	yes	yes	2,0,(5)	2,0,(5)	0,0,(5)	0,0,(5)	SRR957843(3;3),SRR957844(4;4),
II	3247114	+	canonical	TGCTA(A*)C	A	3247124	-10	proximal	24	20	yes	yes	yes	5,9,(10)	5,7,(8)	4,2,(7)	4,1,(5)	SRR957843(19;15),SRR957844(5;5),
II	3261575	+	canonical	TACTA(A*)T	A	3261585	-10	proximal	8	6	yes	yes	yes	0,1,(7)	0,1,(5)	0,1,(7)	0,1,(5)	SRR957843(7;5),SRR957844(1;1),
II	3267586	+	canonical	TATTA(A*)T	A	3267596	-10	proximal	1	1	yes	no	yes	0,0,(1)	0,0,(1)	0,0,(1)	0,0,(1)	SRR957844(1;1),
II	3301422	+	canonical	TGCTA(A*)C	A	3301429	-7	proximal	1	1	yes	no	yes	0,1,(0)	0,1,(0)	0,1,(0)	0,1,(0)	SRR957844(1;1),
II	3305063	+	canonical	AATTA(A*)T	A	3305073	-10	proximal	5	4	yes	yes	yes	0,1,(4)	0,1,(3)	0,1,(4)	0,1,(3)	SRR957844(2;2),SRR957843(3;2),
II	3318389	+	canonical	TCCTA(A*)C	A	3318401	-12	expected	15	13	yes	yes	yes	1,7,(7)	1,5,(7)	0,1,(4)	0,1,(4)	SRR957844(5;5),SRR957843(10;8),
II	3324370	+	canonical	TACTA(A*)C	A	3324386	-16	expected	8	7	yes	yes	yes	0,0,(8)	0,0,(7)	0,0,(8)	0,0,(7)	SRR957843(4;4),SRR957844(4;3),
II	3327583	+	canonical	TTCTG(A*)C	A	3327596	-13	expected	24	23	yes	yes	yes	2,1,(21)	2,1,(20)	0,1,(16)	0,1,(16)	SRR957843(11;10),SRR957844(13;13),
II	3348288	+	canonical	TTCTA(A*)C	A	3348300	-12	expected	4	4	yes	yes	yes	0,1,(3)	0,1,(3)	0,0,(3)	0,0,(3)	SRR957842(1;1),SRR957843(1;1),SRR957844(2;2),
II	3365990	+	canonical	TCCTA(A*)C	A	3365997	-7	proximal	4	4	yes	yes	yes	0,0,(4)	0,0,(4)	0,0,(4)	0,0,(4)	SRR957843(1;1),SRR957844(3;3),
II	3449354	+	canonical	TACTA(A*)T	A	3449370	-16	expected	1	1	yes	no	yes	0,0,(1)	0,0,(1)	0,0,(1)	0,0,(1)	SRR957843(1;1),
II	3479433	+	canonical	AGCTA(A*)C	A	3479441	-8	proximal	6	5	no	yes	yes	5,0,(1)	4,0,(1)	0,0,(0)	0,0,(0)	SRR957844(4;3),SRR957843(2;2),
II	3520696	+	canonical	TACTA(A*)C	A	3520707	-11	expected	2	1	yes	no	yes	2,0,(0)	1,0,(0)	2,0,(0)	1,0,(0)	SRR957844(2;1),
II	3522992	+	canonical	TACTG(A*)T	A	3523001	-9	proximal	325	82	yes	yes	yes	205,4,(116)	40,3,(39)	0,4,(107)	0,3,(33)	SRR957841(1;1),SRR957844(132;36),SRR957842(1;1),SRR957843(191;44),
II	3523209	+	canonical	CACTA(A*)C	A	3523223	-14	expected	1	1	yes	no	yes	0,0,(1)	0,0,(1)	0,0,(1)	0,0,(1)	SRR957843(1;1),
II	3523615	+	canonical	TACTA(A*)C	A	3523625	-10	proximal	1	1	no	no	yes	0,1,(0)	0,1,(0)	0,0,(0)	0,0,(0)	SRR957843(1;1),
II	3652671	+	canonical	TATTA(A*)C	A	3652679	-8	proximal	100	47	yes	yes	yes	2,9,(89)	2,6,(39)	0,1,(80)	0,1,(33)	SRR957843(68;27),SRR957844(32;20),
II	3655767	+	canonical	TATTA(A*)C	A	3655779	-12	expected	1	1	yes	no	yes	0,0,(1)	0,0,(1)	0,0,(1)	0,0,(1)	SRR957843(1;1),
II	3709742	+	canonical	TACTA(A*)A	A	3709755	-13	expected	65	42	yes	yes	yes	3,8,(54)	3,8,(31)	0,0,(46)	0,0,(25)	SRR957844(29;16),SRR957843(36;26),
II	3729909	+	canonical	AACTA(A*)T	A	3729920	-11	expected	2	2	yes	yes	yes	0,1,(1)	0,1,(1)	0,0,(1)	0,0,(1)	SRR957843(2;2),
II	3730051	+	canonical	TGCTA(A*)C	A	3730060	-9	proximal	5	5	yes	yes	yes	0,1,(4)	0,1,(4)	0,0,(4)	0,0,(4)	SRR957843(3;3),SRR957844(2;2),
II	3752742	+	canonical	TACTA(A*)C	A	3752756	-14	expected	2	2	yes	no	yes	0,0,(2)	0,0,(2)	0,0,(2)	0,0,(2)	SRR957843(2;2),
II	3773785	+	canonical	TACTA(A*)T	A	3773794	-9	proximal	13	9	yes	yes	yes	3,8,(2)	3,4,(2)	1,2,(1)	1,1,(1)	SRR957843(7;4),SRR957842(1;1),SRR957844(5;4),
II	3786189	+	canonical	TATTA(A*)C	A	3786200	-11	expected	63	46	yes	yes	yes	0,6,(57)	0,6,(40)	0,1,(55)	0,1,(38)	SRR957844(29;21),SRR957843(34;25),
II	3806233	+	canonical	TGCTA(A*)T	A	3806243	-10	proximal	24	17	yes	yes	yes	2,0,(22)	2,0,(15)	0,0,(21)	0,0,(14)	SRR957844(13;10),SRR957843(11;7),
II	3818517	+	canonical	TACTA(A*)T	A	3818529	-12	expected	155	57	yes	yes	yes	4,8,(143)	4,7,(46)	0,1,(142)	0,1,(45)	SRR957843(80;30),SRR957844(75;27),
II	3850313	+	canonical	GACTA(A*)C	A	3850323	-10	proximal	10	8	yes	yes	yes	3,1,(6)	2,1,(5)	2,0,(0)	1,0,(0)	SRR957844(3;3),SRR957843(7;5),
II	3888921	+	canonical	TGCTA(A*)T	A	3888932	-11	expected	2	2	no	yes	yes	2,0,(0)	2,0,(0)	0,0,(0)	0,0,(0)	SRR957842(1;1),SRR957843(1;1),
II	3935415	+	canonical	TATTA(A*)C	A	3935424	-9	proximal	11	10	yes	yes	yes	0,2,(9)	0,2,(8)	0,1,(9)	0,1,(8)	SRR957844(4;4),SRR957843(6;5),SRR957841(1;1),
II	3971313	+	canonical	AATTA(A*)C	A	3971325	-12	expected	12	10	yes	yes	yes	0,1,(11)	0,1,(9)	0,0,(11)	0,0,(9)	SRR957844(5;5),SRR957843(7;5),
II	3997058	+	canonical	TGCTA(A*)C	A	3997066	-8	proximal	8	7	yes	yes	yes	2,1,(5)	2,1,(4)	0,0,(5)	0,0,(4)	SRR957843(3;3),SRR957844(5;4),
II	3998105	+	canonical	TACTA(A*)C	A	3998115	-10	proximal	1	1	yes	no	yes	0,0,(1)	0,0,(1)	0,0,(1)	0,0,(1)	SRR957843(1;1),
II	4005164	+	canonical	GGCTA(A*)C	A	4005171	-7	proximal	1	1	yes	no	yes	0,0,(1)	0,0,(1)	0,0,(1)	0,0,(1)	SRR957843(1;1),
II	4005371	+	canonical	TACTA(A*)C	A	4005387	-16	expected	1	1	yes	no	yes	0,0,(1)	0,0,(1)	0,0,(1)	0,0,(1)	SRR957844(1;1),
II	4005794	+	canonical	TGTTA(A*)C	A	4005803	-9	proximal	19	16	yes	yes	yes	0,4,(15)	0,3,(13)	0,0,(15)	0,0,(13)	SRR957843(12;10),SRR957844(7;6),
II	4005928	+	canonical	TACTA(A*)C	A	4005940	-12	expected	9	7	yes	yes	yes	2,0,(7)	1,0,(6)	2,0,(6)	1,0,(5)	SRR957842(2;2),SRR957844(6;4),SRR957841(1;1),
II	4008495	+	canonical	TATTA(A*)C	A	4008507	-12	expected	15	11	yes	yes	yes	0,2,(13)	0,2,(9)	0,1,(12)	0,1,(8)	SRR957843(6;4),SRR957844(9;7),
II	4030688	+	canonical	TGCTA(A*)C	A	4030699	-11	expected	3	3	yes	yes	yes	0,0,(3)	0,0,(3)	0,0,(2)	0,0,(2)	SRR957844(2;2),SRR957843(1;1),
II	4060133	+	canonical	GACTA(A*)C	A	4060144	-11	expected	5	2	yes	yes	yes	0,1,(4)	0,1,(1)	0,0,(4)	0,0,(1)	SRR957843(1;1),SRR957844(4;1),
II	4073863	+	canonical	TACTA(A*)T	A	4073870	-7	proximal	14	13	yes	yes	yes	2,0,(12)	2,0,(11)	0,0,(12)	0,0,(11)	SRR957844(4;4),SRR957843(10;9),
II	4074226	+	canonical	TACTA(A*)C	A	4074237	-11	expected	68	57	yes	yes	yes	12,9,(47)	11,9,(37)	11,1,(40)	10,1,(32)	SRR957844(25;21),SRR957843(43;36),
II	4074358	+	canonical	TACTA(A*)T	A	4074365	-7	proximal	1	1	yes	no	yes	0,0,(1)	0,0,(1)	0,0,(1)	0,0,(1)	SRR957843(1;1),
II	4092524	+	canonical	TATTC(A*)T	A	4092539	-15	expected	1	1	yes	no	yes	0,0,(1)	0,0,(1)	0,0,(1)	0,0,(1)	SRR957843(1;1),
II	4165140	+	canonical	TGCTC(A*)C	A	4165152	-12	expected	22	20	yes	yes	yes	0,2,(20)	0,2,(18)	0,0,(15)	0,0,(14)	SRR957844(10;8),SRR957843(12;12),
II	4190257	+	canonical	TACTG(A*)C	A	4190266	-9	proximal	95	55	yes	yes	yes	51,0,(44)	27,0,(28)	1,0,(44)	1,0,(28)	SRR957843(53;34),SRR957844(42;21),
II	4232283	+	canonical	TGCTA(A*)C	A	4232297	-14	expected	51	27	yes	yes	yes	35,2,(14)	15,2,(10)	11,0,(10)	4,0,(7)	SRR957844(14;10),SRR957843(37;17),
II	4244350	+	canonical	TACTA(A*)C	A	4244359	-9	proximal	62	40	yes	yes	yes	2,4,(56)	2,3,(35)	1,1,(52)	1,1,(31)	SRR957843(42;27),SRR957844(20;13),
II	4275865	+	canonical	TGTTT(A*)C	A	4275914	-49	expected	1	1	yes	no	yes	0,0,(1)	0,0,(1)	0,0,(1)	0,0,(1)	SRR957844(1;1),
II	4282539	+	canonical	TATTA(A*)C	A	4282552	-13	expected	6	5	yes	yes	yes	0,0,(6)	0,0,(5)	0,0,(5)	0,0,(4)	SRR957843(5;4),SRR957844(1;1),
II	4284212	+	canonical	TAGTA(A*)C	A	4284223	-11	expected	192	99	yes	yes	yes	5,63,(124)	5,37,(57)	2,2,(115)	2,2,(49)	SRR957843(112;53),SRR957844(80;46),
II	4319529	+	canonical	TACTA(A*)C	A	4319541	-12	expected	3	2	yes	yes	yes	0,0,(3)	0,0,(2)	0,0,(3)	0,0,(2)	SRR957843(1;1),SRR957844(2;1),
II	4368621	+	canonical	TACTA(A*)C	A	4368634	-13	expected	13	7	yes	yes	yes	0,0,(13)	0,0,(7)	0,0,(13)	0,0,(7)	SRR957843(3;3),SRR957844(10;4),
II	4376053	+	canonical	TATTA(A*)C	A	4376061	-8	proximal	31	23	yes	yes	yes	0,7,(24)	0,5,(18)	0,0,(22)	0,0,(17)	SRR957844(10;10),SRR957843(21;13),
II	4376287	+	canonical	AACTA(A*)C	A	4376294	-7	proximal	4	4	yes	yes	yes	0,0,(4)	0,0,(4)	0,0,(4)	0,0,(4)	SRR957843(3;3),SRR957844(1;1),
II	4380742	+	canonical	TATTA(A*)C	A	4380753	-11	expected	2	2	yes	no	yes	0,0,(2)	0,0,(2)	0,0,(2)	0,0,(2)	SRR957844(2;2),
III	89147	-	canonical	TGCTA(A*)C	A	89136	-11	expected	149	100	yes	yes	yes	63,28,(58)	37,23,(40)	27,1,(45)	17,1,(30)	SRR957843(104;66),SRR957844(45;34),
III	110185	-	canonical	TACTA(A*)C	A	110171	-14	expected	6	6	yes	yes	yes	0,0,(6)	0,0,(6)	0,0,(5)	0,0,(5)	SRR957844(1;1),SRR957843(5;5),
III	147744	-	canonical	TACTA(A*)C	A	147731	-13	expected	17	14	yes	yes	yes	3,1,(13)	2,1,(11)	1,0,(12)	1,0,(10)	SRR957843(7;6),SRR957844(10;8),
III	225179	-	canonical	AACTA(A*)T	A	225172	-7	proximal	107	45	yes	yes	yes	1,7,(99)	1,6,(38)	0,1,(92)	0,1,(32)	SRR957843(71;27),SRR957844(36;18),
III	308103	-	canonical	TATTA(A*)C	A	308091	-12	expected	5	5	yes	yes	yes	0,0,(5)	0,0,(5)	0,0,(4)	0,0,(4)	SRR957844(1;1),SRR957843(4;4),
III	339367	-	canonical	TACTA(A*)C	A	339354	-13	expected	25	21	yes	yes	yes	1,0,(24)	1,0,(20)	1,0,(24)	1,0,(20)	SRR957844(11;9),SRR957843(14;12),
III	379665	-	canonical	TACTA(A*)T	A	379652	-13	expected	1	1	yes	no	yes	0,0,(1)	0,0,(1)	0,0,(1)	0,0,(1)	SRR957843(1;1),
III	389226	-	canonical	TACTA(A*)C	A	389218	-8	proximal	84	54	yes	yes	yes	4,19,(61)	4,17,(33)	3,5,(61)	3,5,(33)	SRR957844(36;26),SRR957843(48;28),
III	389421	-	canonical	TACTA(A*)C	A	389412	-9	proximal	12	10	yes	yes	yes	5,1,(6)	5,1,(4)	4,1,(6)	4,1,(4)	SRR957844(8;6),SRR957843(4;4),
III	408706	-	canonical	CACTA(A*)C	A	408693	-13	expected	2	2	yes	no	yes	0,0,(2)	0,0,(2)	0,0,(2)	0,0,(2)	SRR957843(2;2),
III	416541	-	canonical	AGCTA(A*)C	A	416532	-9	proximal	8	7	yes	yes	yes	3,1,(4)	3,1,(3)	0,0,(4)	0,0,(3)	SRR957844(2;2),SRR957843(6;5),
III	416790	-	canonical	TGCTA(A*)C	A	416779	-11	expected	10	6	yes	yes	yes	1,0,(9)	1,0,(5)	0,0,(9)	0,0,(5)	SRR957844(6;3),SRR957843(4;3),
III	422898	-	canonical	TTCTA(A*)C	A	422886	-12	expected	5	4	yes	yes	yes	0,1,(4)	0,1,(3)	0,0,(4)	0,0,(3)	SRR957843(5;4),
III	469506	-	canonical	TGCTA(A*)C	A	469497	-9	proximal	70	44	yes	yes	yes	12,5,(53)	10,5,(29)	3,0,(52)	2,0,(28)	SRR957844(25;15),SRR957843(45;29),
III	478757	-	canonical	CATTA(A*)C	A	478745	-12	expected	1	1	no	no	yes	0,1,(0)	0,1,(0)	0,0,(0)	0,0,(0)	SRR957843(1;1),
III	495624	-	canonical	TACTA(A*)C	A	495612	-12	expected	3	2	yes	no	yes	0,0,(3)	0,0,(2)	0,0,(3)	0,0,(2)	SRR957844(3;2),
III	506503	-	canonical	TTCTA(A*)C	A	506492	-11	expected	16	14	yes	yes	yes	1,2,(13)	1,2,(11)	1,0,(13)	1,0,(11)	SRR957844(11;9),SRR957843(5;5),
III	517134	-	canonical	TATTA(A*)C	A	516885	-249	distal	2	2	yes	yes	yes	0,1,(1)	0,1,(1)	0,1,(1)	0,1,(1)	SRR957843(2;2),
III	540389	-	canonical	TGCTA(A*)C	A	540376	-13	expected	699	203	yes	yes	yes	81,79,(539)	48,44,(111)	38,7,(522)	26,7,(98)	SRR957844(244;79),SRR957843(455;124),
III	569180	-	canonical	AACTG(A*)C	A	569089	-91	distal	1	1	no	no	yes	1,0,(0)	1,0,(0)	0,0,(0)	0,0,(0)	SRR957843(1;1),
III	591077	-	canonical	TACTA(A*)T	A	591067	-10	proximal	2	2	yes	no	yes	0,0,(2)	0,0,(2)	0,0,(2)	0,0,(2)	SRR957843(2;2),
III	596523	-	canonical	TACTA(A*)C	A	596512	-11	expected	17	14	yes	yes	yes	2,4,(11)	1,4,(9)	2,2,(10)	1,2,(8)	SRR957843(6;5),SRR957844(11;9),
III	602176	-	canonical	TTTTA(A*)C	A	602161	-15	expected	1	1	yes	no	yes	0,0,(1)	0,0,(1)	0,0,(1)	0,0,(1)	SRR957843(1;1),
III	602437	-	canonical	TGCTA(A*)T	A	602429	-8	proximal	2	1	no	no	yes	2,0,(0)	1,0,(0)	0,0,(0)	0,0,(0)	SRR957844(2;1),
III	627709	-	canonical	TGCTA(A*)C	A	627697	-12	expected	8	6	yes	yes	yes	1,0,(7)	1,0,(5)	0,0,(7)	0,0,(5)	SRR957844(5;3),SRR957843(3;3),
III	629857	-	canonical	TACTA(A*)T	A	629847	-10	proximal	11	10	yes	yes	yes	2,0,(9)	2,0,(8)	0,0,(9)	0,0,(8)	SRR957843(8;7),SRR957844(3;3),
III	641934	-	canonical	TACTA(A*)C	A	641924	-10	proximal	3	2	yes	no	yes	0,0,(3)	0,0,(2)	0,0,(3)	0,0,(2)	SRR957844(3;2),
III	671179	-	canonical	TGCTA(A*)C	A	671166	-13	expected	1	1	yes	no	yes	0,0,(1)	0,0,(1)	0,0,(1)	0,0,(1)	SRR957844(1;1),
III	697765	-	canonical	TACTA(A*)C	A	697752	-13	expected	44	31	yes	yes	yes	2,2,(40)	1,2,(28)	2,0,(39)	1,0,(27)	SRR957843(22;15),SRR957844(22;16),
III	705738	-	canonical	TTCTA(A*)C	A	705722	-16	expected	2	2	yes	no	yes	0,0,(2)	0,0,(2)	0,0,(2)	0,0,(2)	SRR957843(2;2),
III	740546	-	canonical	TGCTT(A*)C	A	740535	-11	expected	1	1	yes	no	yes	1,0,(0)	1,0,(0)	1,0,(0)	1,0,(0)	SRR957843(1;1),
III	740698	-	canonical	TACTG(A*)C	A	740688	-10	proximal	1	1	yes	no	yes	0,0,(1)	0,0,(1)	0,0,(1)	0,0,(1)	SRR957844(1;1),
III	740752	-	canonical	TTCTA(A*)T	A	740688	-64	distal	2	1	yes	no	yes	0,0,(2)	0,0,(1)	0,0,(2)	0,0,(1)	SRR957844(2;1),
III	740774	-	canonical	TTCTA(A*)C	A	740765	-9	proximal	2	2	yes	yes	yes	0,0,(2)	0,0,(2)	0,0,(2)	0,0,(2)	SRR957844(1;1),SRR957843(1;1),
III	748203	-	canonical	TACTG(A*)C	A	748192	-11	expected	18	18	yes	yes	yes	5,1,(12)	5,1,(12)	0,0,(12)	0,0,(12)	SRR957844(8;8),SRR957843(10;10),
III	785771	-	canonical	TATTT(A*)C	A	785244	-527	distal	1	1	yes	no	yes	0,0,(1)	0,0,(1)	0,0,(1)	0,0,(1)	SRR957844(1;1),
III	873655	-	canonical	AACTA(A*)C	A	873641	-14	expected	7	5	yes	yes	yes	0,1,(6)	0,1,(4)	0,0,(6)	0,0,(4)	SRR957843(2;2),SRR957844(5;3),
III	873838	-	canonical	TTCTA(A*)T	A	873641	-197	distal	3	3	yes	yes	yes	0,0,(3)	0,0,(3)	0,0,(3)	0,0,(3)	SRR957844(1;1),SRR957843(2;2),
III	878333	-	canonical	TACTA(A*)C	A	878318	-15	expected	1	1	no	no	yes	0,1,(0)	0,1,(0)	0,0,(0)	0,0,(0)	SRR957843(1;1),
III	887743	-	canonical	TATTA(A*)C	A	887733	-10	proximal	24	19	yes	yes	yes	1,4,(19)	1,3,(15)	0,0,(15)	0,0,(12)	SRR957843(15;11),SRR957844(9;8),
III	891677	-	canonical	AGCTA(A*)C	A	891666	-11	expected	6	5	yes	yes	yes	1,3,(2)	1,2,(2)	0,0,(2)	0,0,(2)	SRR957843(6;5),
III	898644	-	canonical	TACTA(A*)C	A	898632	-12	expected	1	1	yes	no	yes	0,0,(1)	0,0,(1)	0,0,(1)	0,0,(1)	SRR957844(1;1),
III	898838	-	canonical	TACTG(A*)C	A	898827	-11	expected	1	1	yes	no	yes	0,1,(0)	0,1,(0)	0,1,(0)	0,1,(0)	SRR957843(1;1),
III	934296	-	canonical	TTCTA(A*)C	A	934284	-12	expected	4	4	yes	yes	yes	0,1,(3)	0,1,(3)	0,0,(3)	0,0,(3)	SRR957842(2;2),SRR957843(1;1),SRR957844(1;1),
III	945867	-	canonical	TGCTA(A*)C	A	945859	-8	proximal	37	27	yes	yes	yes	16,8,(13)	10,6,(11)	1,1,(12)	1,1,(10)	SRR957844(15;11),SRR957843(22;16),
III	957030	-	canonical	TGCTA(A*)C	A	957014	-16	expected	4	4	yes	no	yes	0,0,(4)	0,0,(4)	0,0,(4)	0,0,(4)	SRR957843(4;4),
III	994544	-	canonical	TGCTA(A*)T	A	994533	-11	expected	35	28	yes	yes	yes	4,2,(29)	4,2,(22)	0,1,(29)	0,1,(22)	SRR957844(9;8),SRR957843(26;20),
III	1001636	-	canonical	TGCTA(A*)T	A	1001624	-12	expected	15	12	yes	yes	yes	2,0,(13)	2,0,(10)	0,0,(13)	0,0,(10)	SRR957843(4;4),SRR957844(11;8),
III	1001956	-	canonical	TGCTA(A*)C	A	1001947	-9	proximal	6	6	no	yes	yes	3,0,(3)	3,0,(3)	0,0,(0)	0,0,(0)	SRR957844(3;3),SRR957843(3;3),
III	1020974	-	canonical	TACTT(A*)C	A	1020956	-18	expected	2	2	yes	no	yes	0,0,(2)	0,0,(2)	0,0,(2)	0,0,(2)	SRR957843(2;2),
III	1042792	-	canonical	AACTG(A*)C	A	1042780	-12	expected	3	3	yes	yes	yes	0,1,(2)	0,1,(2)	0,1,(2)	0,1,(2)	SRR957843(1;1),SRR957844(2;2),
III	1231372	-	canonical	AATTA(A*)C	A	1231359	-13	expected	46	26	yes	yes	yes	1,3,(42)	1,3,(22)	0,2,(41)	0,2,(21)	SRR957843(22;14),SRR957844(24;12),
III	1266022	-	canonical	TACTA(A*)C	A	1266005	-17	expected	41	24	yes	yes	yes	0,2,(39)	0,2,(22)	0,0,(39)	0,0,(22)	SRR957844(16;12),SRR957843(25;12),
III	1266431	-	canonical	TATTG(A*)C	A	1266417	-14	expected	237	119	yes	yes	yes	26,7,(204)	17,7,(95)	0,5,(198)	0,5,(90)	SRR957844(101;50),SRR957843(136;69),
III	1266558	-	canonical	TCTTA(A*)C	A	1266543	-15	expected	595	153	yes	yes	yes	28,39,(528)	19,28,(106)	1,12,(494)	1,11,(85)	SRR957842(1;1),SRR957843(387;97),SRR957844(207;55),
III	1266731	-	canonical	TGCTA(A*)C	A	1266717	-14	expected	37	28	yes	yes	yes	13,2,(22)	10,2,(16)	0,1,(20)	0,1,(14)	SRR957844(16;12),SRR957843(21;16),
III	1281966	-	canonical	AACTA(A*)T	A	1281950	-16	expected	115	31	yes	yes	yes	2,3,(110)	1,3,(27)	0,2,(109)	0,2,(26)	SRR957844(52;15),SRR957843(63;16),
III	1348245	-	canonical	TACTA(A*)C	A	1348238	-7	proximal	1	1	no	no	yes	0,1,(0)	0,1,(0)	0,0,(0)	0,0,(0)	SRR957843(1;1),
III	1349040	-	canonical	CGCTA(A*)C	A	1349024	-16	expected	2	2	yes	yes	yes	1,0,(1)	1,0,(1)	0,0,(1)	0,0,(1)	SRR957844(1;1),SRR957843(1;1),
III	1446525	-	canonical	TACTA(A*)C	A	1446511	-14	expected	99	54	yes	yes	yes	13,8,(78)	11,7,(36)	6,2,(77)	6,2,(35)	SRR957844(59;28),SRR957843(40;26),
III	1446919	-	canonical	AGCTA(A*)C	A	1446907	-12	expected	223	114	yes	yes	yes	46,22,(155)	34,19,(61)	12,6,(149)	11,5,(58)	SRR957843(132;66),SRR957844(91;48),
III	1465071	-	canonical	TACTA(A*)C	A	1465061	-10	proximal	40	32	yes	yes	yes	7,5,(28)	7,5,(20)	0,0,(28)	0,0,(20)	SRR957844(13;10),SRR957843(27;22),
III	1484591	-	canonical	TACTA(A*)T	A	1484578	-13	expected	19	14	yes	yes	yes	2,3,(14)	1,3,(10)	0,0,(14)	0,0,(10)	SRR957843(14;9),SRR957844(5;5),
III	1492164	-	canonical	TACTA(A*)C	A	1492154	-10	proximal	10	9	yes	yes	yes	0,0,(10)	0,0,(9)	0,0,(10)	0,0,(9)	SRR957843(6;5),SRR957844(4;4),
III	1522609	-	canonical	GGCTA(A*)C	A	1522595	-14	expected	42	33	yes	yes	yes	7,7,(28)	7,7,(19)	7,0,(24)	7,0,(15)	SRR957844(21;15),SRR957843(21;18),
III	1541677	-	canonical	TACTA(A*)T	A	1541661	-16	expected	7	6	yes	yes	yes	1,0,(6)	1,0,(5)	0,0,(6)	0,0,(5)	SRR957844(1;1),SRR957843(6;5),
III	1607251	-	canonical	TACTA(A*)C	A	1607233	-18	expected	189	79	yes	yes	yes	15,50,(124)	10,24,(45)	4,9,(118)	3,7,(39)	SRR957844(68;31),SRR957843(121;48),
III	1614587	-	canonical	TATTA(A*)C	A	1614577	-10	proximal	45	27	yes	yes	yes	0,3,(42)	0,3,(24)	0,0,(40)	0,0,(22)	SRR957844(16;10),SRR957843(29;17),
III	1614668	-	canonical	TACTG(A*)C	A	1614577	-91	distal	1	1	no	no	yes	1,0,(0)	1,0,(0)	0,0,(0)	0,0,(0)	SRR957843(1;1),
III	1615205	-	canonical	TACTA(A*)C	A	1615188	-17	expected	12	11	yes	yes	yes	0,0,(12)	0,0,(11)	0,0,(12)	0,0,(11)	SRR957844(6;6),SRR957843(6;5),
III	1615594	-	canonical	TTCTG(A*)C	A	1615583	-11	expected	3	3	yes	no	yes	0,0,(3)	0,0,(3)	0,0,(3)	0,0,(3)	SRR957844(3;3),
III	1615792	-	canonical	GATTA(A*)C	A	1615783	-9	proximal	17	10	yes	yes	yes	3,0,(14)	1,0,(9)	3,0,(13)	1,0,(8)	SRR957843(9;5),SRR957844(8;5),
III	1617657	-	canonical	TACTA(A*)C	A	1617647	-10	proximal	153	69	yes	yes	yes	4,26,(123)	4,20,(45)	1,3,(112)	1,3,(36)	SRR957843(91;42),SRR957844(62;27),
III	1642727	-	canonical	GACTA(A*)C	A	1642717	-10	proximal	2	2	yes	no	yes	0,0,(2)	0,0,(2)	0,0,(2)	0,0,(2)	SRR957843(2;2),
III	1662261	-	canonical	TGCTA(A*)C	A	1662248	-13	expected	21	19	yes	yes	yes	8,1,(12)	6,1,(12)	3,0,(11)	2,0,(11)	SRR957842(1;1),SRR957843(11;11),SRR957844(9;7),
III	1664654	-	canonical	TGCTA(A*)C	A	1664644	-10	proximal	1	1	no	no	yes	1,0,(0)	1,0,(0)	0,0,(0)	0,0,(0)	SRR957844(1;1),
III	1692741	-	canonical	TGCTA(A*)C	A	1692727	-14	expected	2	2	yes	yes	yes	0,0,(2)	0,0,(2)	0,0,(2)	0,0,(2)	SRR957843(1;1),SRR957844(1;1),
III	1693433	-	canonical	TACTA(A*)C	A	1693416	-17	expected	7	6	yes	yes	yes	1,0,(6)	1,0,(5)	0,0,(6)	0,0,(5)	SRR957843(2;2),SRR957844(5;4),
III	1737796	-	canonical	TGCTA(A*)C	A	1737778	-18	expected	17	13	yes	yes	yes	0,1,(16)	0,1,(12)	0,1,(15)	0,1,(11)	SRR957843(11;9),SRR957844(6;4),
III	1796692	-	canonical	TGCTA(A*)T	A	1796682	-10	proximal	1	1	no	no	yes	1,0,(0)	1,0,(0)	0,0,(0)	0,0,(0)	SRR957844(1;1),
III	1861271	-	canonical	TACTA(A*)C	A	1861258	-13	expected	15	10	yes	yes	yes	3,0,(12)	2,0,(8)	0,0,(12)	0,0,(8)	SRR957844(5;3),SRR957843(10;7),
III	1861744	-	canonical	TACTT(A*)T	A	1861726	-18	expected	30	22	yes	yes	yes	0,5,(25)	0,5,(17)	0,0,(4)	0,0,(4)	SRR957842(1;1),SRR957843(15;11),SRR957844(14;10),
III	1881734	-	canonical	TACTA(A*)C	A	1881726	-8	proximal	1	1	no	no	yes	1,0,(0)	1,0,(0)	0,0,(0)	0,0,(0)	SRR957844(1;1),
III	1897226	-	canonical	TTCTA(A*)C	A	1897215	-11	expected	27	18	yes	yes	yes	2,5,(20)	1,4,(13)	0,2,(20)	0,1,(13)	SRR957843(15;8),SRR957844(12;10),
III	1917234	-	canonical	TGCTA(A*)T	A	1917222	-12	expected	6	5	yes	yes	yes	0,2,(4)	0,2,(3)	0,0,(4)	0,0,(3)	SRR957843(4;3),SRR957844(2;2),
III	1927691	-	canonical	TGCTA(A*)T	A	1927679	-12	expected	32	24	yes	yes	yes	3,0,(29)	3,0,(21)	0,0,(26)	0,0,(18)	SRR957844(16;10),SRR957843(16;14),
III	1927893	-	canonical	TACTA(A*)T	A	1927880	-13	expected	120	44	yes	yes	yes	3,5,(112)	3,5,(36)	0,1,(110)	0,1,(34)	SRR957844(54;24),SRR957843(66;20),
III	1931228	-	canonical	TGCTG(A*)C	A	1931216	-12	expected	82	56	yes	yes	yes	44,2,(36)	25,2,(29)	0,1,(34)	0,1,(27)	SRR957844(26;21),SRR957843(56;35),
III	1976275	-	canonical	TGCTA(A*)C	A	1976263	-12	expected	63	37	yes	yes	yes	13,6,(44)	7,6,(24)	0,1,(43)	0,1,(23)	SRR957844(23;17),SRR957843(40;20),
III	1977837	-	canonical	TACTA(A*)C	A	1977827	-10	proximal	6	6	yes	yes	yes	0,1,(5)	0,1,(5)	0,0,(5)	0,0,(5)	SRR957843(3;3),SRR957844(3;3),
III	2046710	-	canonical	TACTA(A*)T	A	2046700	-10	proximal	75	37	yes	yes	yes	10,13,(52)	7,10,(20)	1,2,(48)	1,2,(17)	SRR957844(23;13),SRR957843(52;24),
III	2105588	-	canonical	TGCTT(A*)C	A	2105576	-12	expected	1	1	no	no	yes	0,0,(1)	0,0,(1)	0,0,(0)	0,0,(0)	SRR957843(1;1),
III	2113175	-	canonical	CACTA(A*)C	A	2113158	-17	expected	4	4	yes	yes	yes	1,0,(3)	1,0,(3)	0,0,(2)	0,0,(2)	SRR957843(1;1),SRR957844(3;3),
III	2123214	-	canonical	TACTA(A*)C	A	2123202	-12	expected	1	1	yes	no	yes	0,0,(1)	0,0,(1)	0,0,(1)	0,0,(1)	SRR957844(1;1),
III	2124876	-	canonical	TTCTA(A*)C	A	2124866	-10	proximal	11	8	yes	yes	yes	0,1,(10)	0,1,(7)	0,0,(10)	0,0,(7)	SRR957843(8;6),SRR957844(3;2),
III	2125458	-	canonical	TGCTA(A*)C	A	2125448	-10	proximal	3	3	yes	yes	yes	0,0,(3)	0,0,(3)	0,0,(2)	0,0,(2)	SRR957844(2;2),SRR957843(1;1),
III	2140856	-	canonical	TGCTA(A*)C	A	2140843	-13	expected	10	8	yes	yes	yes	2,1,(7)	1,1,(6)	0,0,(7)	0,0,(6)	SRR957844(4;3),SRR957843(6;5),
III	2154865	-	canonical	AACTA(A*)C	A	2154847	-18	expected	44	36	yes	yes	yes	7,9,(28)	6,7,(23)	4,1,(25)	4,1,(20)	SRR957844(24;17),SRR957843(20;19),
III	2157060	-	canonical	CACTA(A*)T	A	2157045	-15	expected	23	14	yes	yes	yes	0,2,(21)	0,2,(12)	0,1,(19)	0,1,(10)	SRR957843(13;8),SRR957844(10;6),
III	2162508	-	canonical	TGCTT(A*)C	A	2162500	-8	proximal	5	5	yes	yes	yes	0,3,(2)	0,3,(2)	0,2,(2)	0,2,(2)	SRR957844(4;4),SRR957843(1;1),
III	2190050	-	canonical	TTCTA(A*)C	A	2190040	-10	proximal	5	5	yes	yes	yes	0,0,(5)	0,0,(5)	0,0,(5)	0,0,(5)	SRR957843(4;4),SRR957844(1;1),
III	2196542	-	canonical	TACTA(A*)C	A	2196522	-20	expected	2	2	yes	no	yes	0,2,(0)	0,2,(0)	0,1,(0)	0,1,(0)	SRR957844(2;2),
III	2196941	-	canonical	TACTA(A*)C	A	2196928	-13	expected	14	14	yes	yes	yes	1,1,(12)	1,1,(12)	0,0,(10)	0,0,(10)	SRR957843(7;7),SRR957844(7;7),
III	2197864	-	canonical	TACTA(A*)T	A	2197853	-11	expected	72	35	yes	yes	yes	2,6,(64)	2,4,(29)	0,1,(63)	0,1,(28)	SRR957844(23;14),SRR957843(49;21),
III	2208307	-	canonical	TGCTA(A*)C	A	2208291	-16	expected	52	34	yes	yes	yes	9,4,(39)	7,4,(23)	8,0,(36)	6,0,(21)	SRR957843(27;16),SRR957844(25;18),
III	2208499	-	canonical	TACTT(A*)C	A	2208490	-9	proximal	1	1	yes	no	yes	0,0,(1)	0,0,(1)	0,0,(1)	0,0,(1)	SRR957844(1;1),
III	2236523	-	canonical	CGCTA(A*)T	A	2236513	-10	proximal	4	4	yes	yes	yes	0,0,(4)	0,0,(4)	0,0,(4)	0,0,(4)	SRR957843(3;3),SRR957844(1;1),
III	2267281	-	canonical	TACTA(A*)T	A	2267270	-11	expected	28	19	yes	yes	yes	2,1,(25)	1,1,(17)	0,0,(25)	0,0,(17)	SRR957843(11;8),SRR957844(17;11),
III	2289111	-	canonical	TACTA(A*)C	A	2289093	-18	expected	13	9	yes	yes	yes	0,0,(13)	0,0,(9)	0,0,(13)	0,0,(9)	SRR957843(5;4),SRR957844(8;5),
III	2366876	-	canonical	TACTA(A*)C	A	2366866	-10	proximal	19	14	yes	yes	yes	3,1,(15)	3,1,(10)	1,0,(15)	1,0,(10)	SRR957843(10;8),SRR957844(9;6),
III	2385117	-	canonical	TGCTA(A*)C	A	2385104	-13	expected	3	2	yes	yes	yes	0,1,(2)	0,1,(1)	0,0,(2)	0,0,(1)	SRR957844(3;2),
III	2387196	-	canonical	GACTA(A*)C	A	2387186	-10	proximal	387	153	yes	yes	yes	54,75,(258)	34,32,(87)	46,3,(238)	29,3,(75)	SRR957841(1;1),SRR957843(225;88),SRR957844(161;64),
III	2408081	-	canonical	AGCTA(A*)C	A	2408069	-12	expected	159	95	yes	yes	yes	52,21,(86)	30,17,(48)	3,2,(21)	3,2,(16)	SRR957842(1;1),SRR957843(101;59),SRR957844(57;35),
III	63426	+	canonical	TACTA(A*)T	A	63435	-9	proximal	83	33	yes	yes	yes	6,0,(77)	5,0,(28)	0,0,(74)	0,0,(26)	SRR957844(42;15),SRR957843(41;18),
III	115169	+	canonical	TACTG(A*)C	A	115182	-13	expected	1	1	yes	no	yes	0,0,(1)	0,0,(1)	0,0,(1)	0,0,(1)	SRR957843(1;1),
III	144575	+	canonical	TACTG(A*)C	A	144588	-13	expected	7	5	yes	yes	yes	5,0,(2)	3,0,(2)	0,0,(2)	0,0,(2)	SRR957844(2;2),SRR957843(5;3),
III	188310	+	canonical	TACTA(A*)C	A	188322	-12	expected	13	12	yes	yes	yes	1,1,(11)	1,1,(10)	0,1,(10)	0,1,(9)	SRR957844(4;3),SRR957843(9;9),
III	191005	+	canonical	TGCTA(A*)C	A	191022	-17	expected	1	1	yes	no	yes	0,0,(1)	0,0,(1)	0,0,(1)	0,0,(1)	SRR957843(1;1),
III	200356	+	canonical	TGCTA(A*)T	A	200364	-8	proximal	56	34	yes	yes	yes	2,6,(48)	2,6,(26)	0,2,(42)	0,2,(21)	SRR957843(30;18),SRR957844(26;16),
III	200633	+	canonical	TGTTA(A*)T	A	200642	-9	proximal	184	61	yes	yes	yes	4,26,(154)	3,12,(46)	0,2,(133)	0,2,(30)	SRR957843(109;39),SRR957844(75;22),
III	200738	+	canonical	TACTA(A*)C	A	200749	-11	expected	3	3	yes	yes	yes	0,2,(1)	0,2,(1)	0,1,(1)	0,1,(1)	SRR957841(1;1),SRR957844(1;1),SRR957843(1;1),
III	216580	+	canonical	TGCTA(A*)C	A	216590	-10	proximal	17	13	yes	yes	yes	2,7,(8)	2,6,(5)	1,1,(8)	1,1,(5)	SRR957844(9;7),SRR957843(8;6),
III	354841	+	canonical	TGCTA(A*)T	A	354855	-14	expected	17	15	yes	yes	yes	2,1,(14)	2,1,(12)	0,0,(13)	0,0,(11)	SRR957844(9;8),SRR957843(8;7),
III	371338	+	canonical	TTTTA(A*)T	A	371352	-14	expected	6	6	yes	yes	yes	0,0,(6)	0,0,(6)	0,0,(6)	0,0,(6)	SRR957844(3;3),SRR957843(3;3),
III	371489	+	canonical	TACTA(A*)T	A	371497	-8	proximal	1	1	no	no	yes	0,1,(0)	0,1,(0)	0,0,(0)	0,0,(0)	SRR957842(1;1),
III	371600	+	canonical	TGCTA(A*)C	A	371611	-11	expected	10	8	yes	yes	yes	2,2,(6)	2,2,(4)	0,1,(5)	0,1,(3)	SRR957843(4;4),SRR957844(6;4),
III	378679	+	canonical	TACTA(A*)T	A	378689	-10	proximal	1	1	yes	no	yes	0,0,(1)	0,0,(1)	0,0,(1)	0,0,(1)	SRR957844(1;1),
III	384802	+	canonical	TACTA(A*)C	A	384820	-18	expected	5	4	yes	yes	yes	0,1,(4)	0,1,(3)	0,0,(4)	0,0,(3)	SRR957843(4;3),SRR957844(1;1),
III	442203	+	canonical	TACTA(A*)C	A	442213	-10	proximal	3	2	yes	yes	yes	0,1,(2)	0,1,(1)	0,0,(2)	0,0,(1)	SRR957843(2;1),SRR957842(1;1),
III	462976	+	canonical	TGCTA(A*)T	A	462983	-7	proximal	48	34	yes	yes	yes	5,8,(35)	5,6,(23)	1,0,(30)	1,0,(19)	SRR957844(18;14),SRR957843(30;20),
III	527743	+	canonical	CACTA(A*)C	A	527750	-7	proximal	1	1	yes	no	yes	0,0,(1)	0,0,(1)	0,0,(1)	0,0,(1)	SRR957843(1;1),
III	528178	+	canonical	TGCTA(A*)C	A	528189	-11	expected	204	96	yes	yes	yes	44,29,(131)	30,19,(47)	11,14,(127)	10,9,(44)	SRR957841(1;1),SRR957843(100;50),SRR957842(2;2),SRR957844(101;43),
III	554855	+	canonical	TTCTA(A*)C	A	554864	-9	proximal	8	7	yes	yes	yes	0,6,(2)	0,5,(2)	0,0,(1)	0,0,(1)	SRR957843(6;5),SRR957844(2;2),
III	560202	+	canonical	CACTA(A*)C	A	560214	-12	expected	1	1	yes	no	yes	0,0,(1)	0,0,(1)	0,0,(1)	0,0,(1)	SRR957844(1;1),
III	560500	+	canonical	TGCTA(A*)C	A	560515	-15	expected	14	8	yes	yes	yes	0,1,(13)	0,1,(7)	0,0,(13)	0,0,(7)	SRR957844(4;3),SRR957843(10;5),
III	581227	+	canonical	TACTA(A*)T	A	581238	-11	expected	13	10	yes	yes	yes	2,1,(10)	2,1,(7)	0,0,(10)	0,0,(7)	SRR957844(1;1),SRR957843(12;9),
III	592340	+	canonical	AACTA(A*)C	A	592352	-12	expected	8	7	yes	yes	yes	0,0,(8)	0,0,(7)	0,0,(8)	0,0,(7)	SRR957843(5;4),SRR957844(3;3),
III	595427	+	canonical	TGCTA(A*)T	A	595492	-65	distal	1	1	yes	no	yes	0,0,(1)	0,0,(1)	0,0,(1)	0,0,(1)	SRR957844(1;1),
III	595446	+	canonical	TACTT(A*)T	A	595492	-46	expected	1	1	yes	no	yes	0,0,(1)	0,0,(1)	0,0,(1)	0,0,(1)	SRR957843(1;1),
III	595477	+	canonical	TATTG(A*)C	A	595492	-15	expected	7	7	yes	yes	yes	0,1,(6)	0,1,(6)	0,0,(6)	0,0,(6)	SRR957843(4;4),SRR957844(3;3),
III	652982	+	canonical	TATTA(A*)T	A	652999	-17	expected	22	13	yes	yes	yes	0,0,(22)	0,0,(13)	0,0,(22)	0,0,(13)	SRR957843(10;7),SRR957844(12;6),
III	659699	+	canonical	GACTA(A*)C	A	659708	-9	proximal	29	27	yes	yes	yes	3,1,(25)	3,1,(23)	3,0,(20)	3,0,(18)	SRR957843(10;10),SRR957844(19;17),
III	660280	+	canonical	TGCTA(A*)C	A	660297	-17	expected	94	39	yes	yes	yes	22,7,(65)	12,4,(23)	4,0,(65)	3,0,(23)	SRR957844(52;22),SRR957843(42;17),
III	685031	+	canonical	AGCTT(A*)C	A	685048	-17	expected	7	7	yes	yes	yes	0,4,(3)	0,4,(3)	0,3,(2)	0,3,(2)	SRR957844(4;4),SRR957843(3;3),
III	686190	+	canonical	GATTA(A*)C	A	686203	-13	expected	28	25	yes	yes	yes	4,0,(24)	4,0,(21)	0,0,(20)	0,0,(17)	SRR957844(11;9),SRR957843(17;16),
III	686221	+	canonical	TGCTG(A*)T	A	687832	-1611	distal	1	1	yes	no	yes	0,0,(1)	0,0,(1)	0,0,(1)	0,0,(1)	SRR957843(1;1),
III	749144	+	canonical	TACTA(A*)C	A	749159	-15	expected	372	128	yes	yes	yes	37,28,(307)	26,21,(81)	8,3,(301)	8,3,(75)	SRR957844(172;58),SRR957843(200;70),
III	749469	+	canonical	TACTA(A*)C	A	749478	-9	proximal	85	39	yes	yes	yes	6,2,(77)	4,2,(33)	0,1,(76)	0,1,(32)	SRR957843(47;19),SRR957844(38;20),
III	755454	+	canonical	GACTG(A*)C	A	755468	-14	expected	2	2	yes	no	yes	0,0,(2)	0,0,(2)	0,0,(1)	0,0,(1)	SRR957844(2;2),
III	757494	+	canonical	TGCTA(A*)T	A	757505	-11	expected	62	35	yes	yes	yes	13,3,(46)	8,3,(24)	0,0,(39)	0,0,(19)	SRR957843(36;20),SRR957844(26;15),
III	757838	+	canonical	CGCTA(A*)C	A	757850	-12	expected	39	28	yes	yes	yes	0,2,(37)	0,2,(26)	0,0,(37)	0,0,(26)	SRR957844(19;13),SRR957843(20;15),
III	773471	+	canonical	TACTA(A*)C	A	773487	-16	expected	10	10	yes	yes	yes	1,1,(8)	1,1,(8)	0,0,(7)	0,0,(7)	SRR957843(4;4),SRR957844(6;6),
III	909276	+	canonical	TATTA(A*)C	A	909288	-12	expected	5	5	yes	yes	yes	0,0,(5)	0,0,(5)	0,0,(5)	0,0,(5)	SRR957844(4;4),SRR957843(1;1),
III	917920	+	canonical	TACTG(A*)C	A	917930	-10	proximal	9	6	yes	yes	yes	4,0,(5)	3,0,(3)	0,0,(5)	0,0,(3)	SRR957844(2;2),SRR957843(7;4),
III	927717	+	canonical	GGCTA(A*)T	A	927732	-15	expected	2	1	yes	no	yes	0,0,(2)	0,0,(1)	0,0,(2)	0,0,(1)	SRR957844(2;1),
III	931065	+	canonical	AACTA(A*)C	A	931077	-12	expected	7	6	yes	yes	yes	2,1,(4)	2,1,(3)	1,0,(4)	1,0,(3)	SRR957844(4;3),SRR957843(3;3),
III	932381	+	canonical	TACTA(A*)C	A	932394	-13	expected	9	8	yes	yes	yes	0,2,(7)	0,2,(6)	0,1,(6)	0,1,(5)	SRR957843(8;7),SRR957844(1;1),
III	981189	+	canonical	AACTA(A*)T	A	981210	-21	expected	3	3	yes	yes	yes	1,0,(2)	1,0,(2)	0,0,(2)	0,0,(2)	SRR957844(2;2),SRR957843(1;1),
III	988792	+	canonical	TGCTC(A*)T	A	988843	-51	expected	1	1	yes	no	yes	0,0,(1)	0,0,(1)	0,0,(1)	0,0,(1)	SRR957843(1;1),
III	988833	+	canonical	TACTA(A*)T	A	988843	-10	proximal	14	11	yes	yes	yes	1,0,(13)	1,0,(10)	0,0,(13)	0,0,(10)	SRR957844(8;5),SRR957843(6;6),
III	995547	+	canonical	TGCTA(A*)G	A	995942	-395	distal	1	1	yes	no	yes	0,0,(1)	0,0,(1)	0,0,(1)	0,0,(1)	SRR957843(1;1),
III	1040589	+	canonical	TACTA(A*)C	A	1040602	-13	expected	17	14	yes	yes	yes	2,3,(12)	2,2,(10)	1,0,(12)	1,0,(10)	SRR957844(7;5),SRR957843(10;9),
III	1176944	+	canonical	TGCTA(A*)C	A	1176952	-8	proximal	26	21	yes	yes	yes	2,2,(22)	2,2,(17)	1,0,(21)	1,0,(16)	SRR957843(15;12),SRR957844(11;9),
III	1177117	+	canonical	CACTA(A*)T	A	1177128	-11	expected	10	8	yes	yes	yes	1,3,(6)	1,2,(5)	0,0,(4)	0,0,(3)	SRR957844(6;4),SRR957843(4;4),
III	1300012	+	canonical	TACTA(A*)C	A	1300024	-12	expected	2	2	yes	yes	yes	0,1,(1)	0,1,(1)	0,0,(1)	0,0,(1)	SRR957843(1;1),SRR957844(1;1),
III	1307117	+	canonical	TACTG(A*)C	A	1307128	-11	expected	30	26	yes	yes	yes	17,0,(13)	14,0,(12)	0,0,(11)	0,0,(10)	SRR957844(9;9),SRR957843(21;17),
III	1312074	+	canonical	TGCTA(A*)C	A	1312088	-14	expected	296	126	yes	yes	yes	75,39,(182)	34,25,(67)	8,2,(155)	6,1,(46)	SRR957843(201;82),SRR957844(95;44),
III	1324340	+	canonical	TGTTA(A*)C	A	1324354	-14	expected	81	53	yes	yes	yes	2,4,(75)	2,4,(47)	0,1,(71)	0,1,(43)	SRR957843(43;31),SRR957844(38;22),
III	1324664	+	canonical	TACTA(A*)C	A	1324677	-13	expected	1	1	yes	no	yes	0,0,(1)	0,0,(1)	0,0,(1)	0,0,(1)	SRR957844(1;1),
III	1329665	+	canonical	TACTG(A*)C	A	1329677	-12	expected	4	4	no	yes	yes	2,0,(2)	2,0,(2)	0,0,(0)	0,0,(0)	SRR957844(2;2),SRR957843(2;2),
III	1331968	+	canonical	TACTA(A*)T	A	1331985	-17	expected	79	51	yes	yes	yes	2,11,(66)	2,11,(38)	0,1,(58)	0,1,(31)	SRR957843(49;32),SRR957844(30;19),
III	1343191	+	canonical	GACTA(A*)C	A	1343204	-13	expected	5	5	yes	yes	yes	0,1,(4)	0,1,(4)	0,1,(4)	0,1,(4)	SRR957843(3;3),SRR957844(2;2),
III	1366964	+	canonical	TACTA(A*)T	A	1366980	-16	expected	89	62	yes	yes	yes	25,37,(27)	19,24,(19)	5,3,(7)	4,3,(7)	SRR957843(59;37),SRR957844(30;25),
III	1367274	+	canonical	TACTA(A*)C	A	1367284	-10	proximal	15	11	yes	yes	yes	5,1,(9)	4,1,(6)	1,0,(8)	1,0,(5)	SRR957843(11;7),SRR957844(4;4),
III	1417622	+	canonical	TACTA(A*)C	A	1417633	-11	expected	8	7	yes	yes	yes	0,1,(7)	0,1,(6)	0,0,(6)	0,0,(5)	SRR957844(2;2),SRR957843(6;5),
III	1427620	+	canonical	GACTA(A*)C	A	1427631	-11	expected	68	48	yes	yes	yes	15,10,(43)	9,8,(31)	12,0,(37)	8,0,(26)	SRR957843(45;34),SRR957844(23;14),
III	1427776	+	canonical	GACTA(A*)C	A	1427787	-11	expected	9	8	yes	yes	yes	0,2,(7)	0,2,(6)	0,1,(7)	0,1,(6)	SRR957843(2;2),SRR957844(7;6),
III	1435579	+	canonical	TGCTA(A*)C	A	1435595	-16	expected	6	5	yes	yes	yes	0,0,(6)	0,0,(5)	0,0,(6)	0,0,(5)	SRR957844(2;2),SRR957843(4;3),
III	1476511	+	canonical	TACTA(A*)C	A	1476524	-13	expected	14	13	yes	yes	yes	4,0,(10)	4,0,(9)	2,0,(10)	2,0,(9)	SRR957843(8;7),SRR957844(6;6),
III	1477708	+	canonical	TGCTG(A*)C	A	1477719	-11	expected	5	5	yes	yes	yes	3,0,(2)	3,0,(2)	0,0,(1)	0,0,(1)	SRR957843(2;2),SRR957844(3;3),
III	1535654	+	canonical	TATTA(A*)C	A	1535665	-11	expected	13	9	yes	yes	yes	0,4,(9)	0,3,(6)	0,3,(7)	0,2,(4)	SRR957843(4;4),SRR957844(9;5),
III	1577024	+	canonical	AATTA(A*)C	A	1577037	-13	expected	13	10	yes	yes	yes	1,0,(12)	1,0,(9)	0,0,(11)	0,0,(8)	SRR957843(10;7),SRR957844(3;3),
III	1622020	+	canonical	TATTA(A*)C	A	1622031	-11	expected	20	17	yes	yes	yes	0,1,(19)	0,1,(16)	0,0,(19)	0,0,(16)	SRR957843(11;10),SRR957844(9;7),
III	1630630	+	canonical	TTTTA(A*)C	A	1630638	-8	proximal	1	1	yes	no	yes	0,0,(1)	0,0,(1)	0,0,(1)	0,0,(1)	SRR957844(1;1),
III	1633159	+	canonical	TACTA(A*)T	A	1633168	-9	proximal	8	7	yes	yes	yes	0,0,(8)	0,0,(7)	0,0,(8)	0,0,(7)	SRR957843(4;4),SRR957844(4;3),
III	1635799	+	canonical	TTCTA(A*)C	A	1635811	-12	expected	57	40	yes	yes	yes	0,7,(50)	0,5,(35)	0,0,(49)	0,0,(34)	SRR957844(35;26),SRR957843(22;14),
III	1641233	+	canonical	TTCTA(A*)C	A	1641242	-9	proximal	21	12	yes	yes	yes	4,1,(16)	3,1,(8)	3,0,(15)	2,0,(7)	SRR957843(8;6),SRR957844(13;6),
III	1653695	+	canonical	TATTA(A*)C	A	1653708	-13	expected	1	1	yes	no	yes	0,0,(1)	0,0,(1)	0,0,(1)	0,0,(1)	SRR957843(1;1),
III	1754615	+	canonical	TACTA(A*)C	A	1754633	-18	expected	1	1	yes	no	yes	0,0,(1)	0,0,(1)	0,0,(1)	0,0,(1)	SRR957844(1;1),
III	1771994	+	canonical	TACTA(A*)C	A	1772010	-16	expected	2	1	yes	no	yes	0,0,(2)	0,0,(1)	0,0,(2)	0,0,(1)	SRR957844(2;1),
III	1778355	+	canonical	TACTA(A*)C	A	1778366	-11	expected	8	7	yes	yes	yes	1,2,(5)	1,2,(4)	1,0,(5)	1,0,(4)	SRR957843(5;4),SRR957844(3;3),
III	1778524	+	canonical	TTCTA(A*)C	A	1778539	-15	expected	1	1	yes	no	yes	0,0,(1)	0,0,(1)	0,0,(1)	0,0,(1)	SRR957844(1;1),
III	1783963	+	canonical	TACTA(A*)T	A	1783974	-11	expected	8	7	yes	yes	yes	0,0,(8)	0,0,(7)	0,0,(8)	0,0,(7)	SRR957844(1;1),SRR957843(7;6),
III	1787595	+	canonical	TGCTA(A*)C	A	1787610	-15	expected	7	5	yes	yes	yes	1,0,(6)	1,0,(4)	0,0,(6)	0,0,(4)	SRR957844(2;2),SRR957843(5;3),
III	1789790	+	canonical	TACTA(A*)C	A	1789804	-14	expected	46	19	yes	yes	yes	3,4,(39)	2,2,(15)	1,1,(39)	1,1,(15)	SRR957843(22;7),SRR957842(2;1),SRR957844(22;11),
III	1790311	+	canonical	TACTA(A*)C	A	1790319	-8	proximal	49	33	yes	yes	yes	5,1,(43)	5,1,(27)	4,0,(42)	4,0,(26)	SRR957844(20;13),SRR957843(29;20),
III	1809971	+	canonical	TACTA(A*)T	A	1809983	-12	expected	2	2	yes	no	yes	0,0,(2)	0,0,(2)	0,0,(2)	0,0,(2)	SRR957843(2;2),
III	1816381	+	canonical	TGCTA(A*)C	A	1816396	-15	expected	546	211	yes	yes	yes	105,52,(389)	66,34,(111)	59,4,(373)	39,4,(98)	SRR957844(216;96),SRR957843(328;113),SRR957842(2;2),
III	1832583	+	canonical	TGCTA(A*)C	A	1832592	-9	proximal	90	40	yes	yes	yes	5,13,(72)	4,10,(26)	0,1,(71)	0,1,(25)	SRR957844(34;18),SRR957843(56;22),
III	1855688	+	canonical	TATTA(A*)C	A	1855704	-16	expected	29	21	yes	yes	yes	0,0,(29)	0,0,(21)	0,0,(27)	0,0,(19)	SRR957843(15;12),SRR957844(14;9),
III	1923669	+	canonical	AGCTA(A*)C	A	1923681	-12	expected	13	12	yes	yes	yes	3,2,(8)	3,2,(7)	0,0,(8)	0,0,(7)	SRR957843(8;7),SRR957844(5;5),
III	1939348	+	canonical	GGCTA(A*)C	A	1939360	-12	expected	17	13	yes	yes	yes	8,1,(8)	7,1,(5)	1,1,(8)	1,1,(5)	SRR957843(6;5),SRR957842(2;2),SRR957844(9;6),
III	1993160	+	canonical	TGCTA(A*)C	A	1993175	-15	expected	4	4	yes	yes	yes	0,0,(4)	0,0,(4)	0,0,(4)	0,0,(4)	SRR957844(3;3),SRR957843(1;1),
III	2012810	+	canonical	TACTA(A*)C	A	2012829	-19	expected	34	25	yes	yes	yes	3,1,(30)	2,1,(22)	2,0,(28)	1,0,(20)	SRR957843(20;14),SRR957844(14;11),
III	2060304	+	canonical	TATTA(A*)C	A	2060314	-10	proximal	7	7	yes	yes	yes	0,0,(7)	0,0,(7)	0,0,(7)	0,0,(7)	SRR957844(3;3),SRR957843(4;4),
III	2089261	+	canonical	TATTC(A*)C	A	2089273	-12	expected	7	6	yes	yes	yes	0,4,(3)	0,3,(3)	0,1,(2)	0,1,(2)	SRR957843(7;6),
III	2103123	+	canonical	TACTA(A*)T	A	2103131	-8	proximal	14	10	yes	yes	yes	1,0,(13)	1,0,(9)	0,0,(13)	0,0,(9)	SRR957843(8;6),SRR957844(6;4),
III	2126618	+	canonical	TTTTA(A*)C	A	2126629	-11	expected	288	82	yes	yes	yes	2,7,(279)	1,5,(76)	0,6,(255)	0,4,(61)	SRR957843(165;46),SRR957844(123;36),
III	2132292	+	canonical	TACTA(A*)C	A	2132308	-16	expected	2	2	yes	yes	yes	0,0,(2)	0,0,(2)	0,0,(2)	0,0,(2)	SRR957843(1;1),SRR957844(1;1),
III	2183903	+	canonical	TTCTA(A*)C	A	2183917	-14	expected	1	1	no	no	yes	0,0,(1)	0,0,(1)	0,0,(0)	0,0,(0)	SRR957843(1;1),
III	2192432	+	canonical	GGCTA(A*)C	A	2192448	-16	expected	2	1	no	no	yes	0,2,(0)	0,1,(0)	0,0,(0)	0,0,(0)	SRR957843(2;1),
III	2201979	+	canonical	TTCTA(A*)C	A	2201988	-9	proximal	8	6	yes	yes	yes	3,5,(0)	2,4,(0)	1,0,(0)	1,0,(0)	SRR957843(5;4),SRR957844(3;2),
III	2204571	+	canonical	TGCTA(A*)C	A	2204615	-44	expected	14	14	yes	yes	yes	7,2,(5)	7,2,(5)	4,0,(5)	4,0,(5)	SRR957843(8;8),SRR957844(6;6),
III	2204955	+	canonical	CACTA(A*)C	A	2204965	-10	proximal	8	8	yes	yes	yes	1,1,(6)	1,1,(6)	1,0,(6)	1,0,(6)	SRR957844(3;3),SRR957843(5;5),
III	2206740	+	canonical	TATTG(A*)C	A	2223242	-16502	distal	1	1	yes	no	yes	0,0,(1)	0,0,(1)	0,0,(1)	0,0,(1)	SRR957843(1;1),
III	2223617	+	canonical	CACTA(A*)C	A	2223629	-12	expected	18	14	yes	yes	yes	0,2,(16)	0,2,(12)	0,1,(15)	0,1,(11)	SRR957843(15;11),SRR957844(3;3),
III	2264556	+	canonical	TGCTA(A*)A	A	2264567	-11	expected	1	1	no	no	yes	0,1,(0)	0,1,(0)	0,0,(0)	0,0,(0)	SRR957843(1;1),
III	2406645	+	canonical	TGCTA(A*)T	A	2406754	-109	distal	1	1	no	no	yes	0,0,(1)	0,0,(1)	0,0,(0)	0,0,(0)	SRR957843(1;1),
I	181853	-	TRANNYTRY	TA(AC*A)CAAA	C	181749	-102	distal	1	1	yes	no	yes	0,0,(0,1,0)	0,0,(0,1,0)	0,0,(0,1,0)	0,0,(0,1,0)	SRR957843(1;1),
I	376455	-	TRANNYTRY	TA(AC*T)CTCT	C	376446	-7	proximal	2	2	yes	no	yes	0,0,(0,2,0)	0,0,(0,2,0)	0,0,(0,2,0)	0,0,(0,2,0)	SRR957843(2;2),
I	401882	-	TRANNYTRY	TA(A*CT)TAAT	A	401871	-7	proximal	14	14	yes	yes	yes	2,1,(11,0,0)	2,1,(11,0,0)	0,0,(11,0,0)	0,0,(11,0,0)	SRR957843(6;6),SRR957844(8;8),
I	419514	-	TRANNYTRY	TA(A*CA)TCGA	A	419502	-8	proximal	20	17	yes	yes	yes	0,5,(15,0,0)	0,3,(14,0,0)	0,1,(15,0,0)	0,1,(14,0,0)	SRR957844(10;9),SRR957843(10;8),
I	501260	-	TRANNYTRY	TA(A*TA)TTTT	A	501248	-8	proximal	1	1	yes	no	yes	0,0,(1,0,0)	0,0,(1,0,0)	0,0,(1,0,0)	0,0,(1,0,0)	SRR957843(1;1),
I	528468	-	TRANNYTRY	TT(A*CT)TTAT	A	528460	-4	proximal	3	2	yes	no	yes	0,0,(3,0,0)	0,0,(2,0,0)	0,0,(3,0,0)	0,0,(2,0,0)	SRR957843(3;2),
I	621860	-	TRANNYTRY	TA(A*CG)CTGC	A	621852	-4	proximal	16	13	yes	yes	yes	1,1,(14,0,0)	1,1,(11,0,0)	0,1,(13,0,0)	0,1,(10,0,0)	SRR957844(3;2),SRR957843(13;11),
I	717594	-	TRANNYTRY	TA(A*CA)TTGT	A	717585	-5	proximal	2	2	yes	yes	yes	0,0,(2,0,0)	0,0,(2,0,0)	0,0,(2,0,0)	0,0,(2,0,0)	SRR957843(1;1),SRR957841(1;1),
I	727741	-	TRANNYTRY	TA(A*CT)GTAC	A	727731	-6	proximal	16	11	yes	yes	yes	3,0,(13,0,0)	3,0,(8,0,0)	3,0,(12,0,0)	3,0,(7,0,0)	SRR957843(9;5),SRR957844(7;6),
I	727911	-	TRANNYTRY	AA(C*AA)TTAT	C	727901	-6	proximal	1	1	yes	no	yes	0,0,(1,0,0)	0,0,(1,0,0)	0,0,(1,0,0)	0,0,(1,0,0)	SRR957844(1;1),
I	774029	-	TRANNYTRY	TA(AC*A)TTTT	C	774023	-6	proximal	1	1	no	no	yes	0,1,(0,0,0)	0,1,(0,0,0)	0,0,(0,0,0)	0,0,(0,0,0)	SRR957843(1;1),
I	786071	-	TRANNYTRY	TA(A*TT)TTGG	A	786062	-5	proximal	216	66	yes	yes	yes	13,9,(194,0,0)	12,8,(46,0,0)	1,4,(188,0,0)	1,3,(41,0,0)	SRR957843(116;38),SRR957844(100;28),
I	791863	-	TRANNYTRY	AC(A*CA)TTAT	A	791851	-8	proximal	1	1	yes	no	yes	1,0,(0,0,0)	1,0,(0,0,0)	1,0,(0,0,0)	1,0,(0,0,0)	SRR957843(1;1),
I	798238	-	TRANNYTRY	TA(A*TG)TTTT	A	798229	-5	proximal	13	12	yes	yes	yes	0,3,(10,0,0)	0,2,(10,0,0)	0,0,(8,0,0)	0,0,(8,0,0)	SRR957843(6;5),SRR957844(7;7),
I	879844	-	TRANNYTRY	TT(C*AT)TTAC	C	879835	-5	proximal	1	1	no	no	yes	1,0,(0,0,0)	1,0,(0,0,0)	0,0,(0,0,0)	0,0,(0,0,0)	SRR957843(1;1),
I	925862	-	TRANNYTRY	TA(AT*G)CTAG	T	925857	-3	proximal	1	1	no	no	yes	0,0,(0,1,0)	0,0,(0,1,0)	0,0,(0,0,0)	0,0,(0,0,0)	SRR957843(1;1),
I	935818	-	TRANNYTRY	TA(CA*A)ATAT	A	935812	-6	proximal	1	1	yes	no	yes	0,1,(0,0,0)	0,1,(0,0,0)	0,1,(0,0,0)	0,1,(0,0,0)	SRR957843(1;1),
I	936382	-	TRANNYTRY	TA(A*CT)TTAT	A	936371	-7	proximal	6	5	yes	yes	yes	0,0,(6,0,0)	0,0,(5,0,0)	0,0,(4,0,0)	0,0,(4,0,0)	SRR957844(2;1),SRR957843(4;4),
I	948145	-	TRANNYTRY	TA(A*CA)TTCC	A	948132	-9	expected	24	16	yes	yes	yes	1,2,(21,0,0)	1,2,(13,0,0)	1,1,(21,0,0)	1,1,(13,0,0)	SRR957843(15;11),SRR957844(9;5),
I	972654	-	TRANNYTRY	TA(A*CT)TGGT	A	972644	-6	proximal	4	3	yes	yes	yes	0,0,(4,0,0)	0,0,(3,0,0)	0,0,(4,0,0)	0,0,(3,0,0)	SRR957844(2;1),SRR957843(2;2),
I	976475	-	TRANNYTRY	TA(A*CT)CTAT	A	976463	-8	proximal	7	7	yes	yes	yes	0,1,(6,0,0)	0,1,(6,0,0)	0,0,(6,0,0)	0,0,(6,0,0)	SRR957843(4;4),SRR957844(3;3),
I	1043276	-	TRANNYTRY	TA(A*CT)GTTT	A	1043264	-8	proximal	1	1	yes	no	yes	0,0,(1,0,0)	0,0,(1,0,0)	0,0,(1,0,0)	0,0,(1,0,0)	SRR957844(1;1),
I	1110303	-	TRANNYTRY	TA(A*CA)CAAT	A	1110293	-6	proximal	1	1	yes	no	yes	0,0,(1,0,0)	0,0,(1,0,0)	0,0,(1,0,0)	0,0,(1,0,0)	SRR957843(1;1),
I	1211993	-	TRANNYTRY	TA(A*CA)TTTC	A	1211984	-5	proximal	127	74	yes	yes	yes	10,9,(106,2,0)	10,8,(54,2,0)	4,4,(103,1,0)	4,4,(52,1,0)	SRR957843(79;48),SRR957844(48;26),
I	1215650	-	TRANNYTRY	TA(A*CT)TTGC	A	1215638	-8	proximal	27	20	yes	yes	yes	3,3,(21,0,0)	2,3,(15,0,0)	0,2,(21,0,0)	0,2,(15,0,0)	SRR957844(11;8),SRR957843(16;12),
I	1300488	-	TRANNYTRY	TA(AC*G)CTTT	C	1300480	-6	proximal	1	1	yes	no	yes	0,0,(0,1,0)	0,0,(0,1,0)	0,0,(0,1,0)	0,0,(0,1,0)	SRR957844(1;1),
I	1323968	-	TRANNYTRY	TA(A*TT)TTGC	A	1323955	-9	expected	6	6	yes	yes	yes	1,0,(5,0,0)	1,0,(5,0,0)	0,0,(4,0,0)	0,0,(4,0,0)	SRR957844(3;3),SRR957843(3;3),
I	1353249	-	TRANNYTRY	TA(AT*T)TTCT	T	1353236	-11	expected	7	7	no	yes	yes	0,0,(0,7,0)	0,0,(0,7,0)	0,0,(0,0,0)	0,0,(0,0,0)	SRR957844(3;3),SRR957843(4;4),
I	1425172	-	TRANNYTRY	TA(A*CA)TTGC	A	1425161	-7	proximal	1	1	no	no	yes	1,0,(0,0,0)	1,0,(0,0,0)	0,0,(0,0,0)	0,0,(0,0,0)	SRR957842(1;1),
I	1504522	-	TRANNYTRY	TA(A*CT)TTGA	A	1504509	-9	expected	3	3	yes	yes	yes	0,0,(3,0,0)	0,0,(3,0,0)	0,0,(3,0,0)	0,0,(3,0,0)	SRR957843(1;1),SRR957844(2;2),
I	1506908	-	TRANNYTRY	TA(A*CT)TTAC	A	1506898	-6	proximal	3	3	yes	yes	yes	0,0,(3,0,0)	0,0,(3,0,0)	0,0,(3,0,0)	0,0,(3,0,0)	SRR957844(1;1),SRR957843(2;2),
I	1554312	-	TRANNYTRY	TA(TTC*)TAAT	C	1554292	-20	expected	1	1	yes	no	yes	0,0,(0,0,1)	0,0,(0,0,1)	0,0,(0,0,1)	0,0,(0,0,1)	SRR957844(1;1),
I	1606811	-	TRANNYTRY	TA(A*CA)GTGT	A	1606803	-4	proximal	16	13	yes	yes	yes	4,3,(9,0,0)	3,3,(7,0,0)	2,0,(6,0,0)	2,0,(4,0,0)	SRR957843(7;6),SRR957844(8;6),SRR957841(1;1),
I	1710558	-	TRANNYTRY	TA(AC*T)GTTT	C	1710549	-7	proximal	4	4	yes	no	yes	0,0,(0,4,0)	0,0,(0,4,0)	0,0,(0,4,0)	0,0,(0,4,0)	SRR957843(4;4),
I	1744964	-	TRANNYTRY	AA(CT*A)TTGT	T	1744950	-14	expected	3	3	yes	yes	yes	0,3,(0,0,0)	0,3,(0,0,0)	0,3,(0,0,0)	0,3,(0,0,0)	SRR957844(1;1),SRR957843(2;2),
I	1808670	-	TRANNYTRY	TG(A*CG)TTGA	A	1808660	-6	proximal	1	1	no	no	yes	1,0,(0,0,0)	1,0,(0,0,0)	0,0,(0,0,0)	0,0,(0,0,0)	SRR957843(1;1),
I	1808934	-	TRANNYTRY	TA(A*CA)TTTT	A	1808918	-12	expected	20	16	yes	yes	yes	0,0,(20,0,0)	0,0,(16,0,0)	0,0,(19,0,0)	0,0,(15,0,0)	SRR957844(4;4),SRR957843(16;12),
I	1881491	-	TRANNYTRY	TA(AC*A)TCGT	C	1881478	-11	expected	1	1	yes	no	yes	0,0,(0,1,0)	0,0,(0,1,0)	0,0,(0,1,0)	0,0,(0,1,0)	SRR957843(1;1),
I	1885891	-	TRANNYTRY	TA(A*CA)TTAT	A	1885876	-11	expected	10	8	yes	yes	yes	1,0,(9,0,0)	1,0,(7,0,0)	0,0,(8,0,0)	0,0,(6,0,0)	SRR957844(4;4),SRR957843(6;4),
I	1920207	-	TRANNYTRY	TA(AC*T)TTTA	C	1920201	-4	proximal	14	12	yes	yes	yes	0,0,(0,14,0)	0,0,(0,12,0)	0,0,(0,14,0)	0,0,(0,12,0)	SRR957844(1;1),SRR957843(13;11),
I	2028584	-	TRANNYTRY	TA(A*CA)TTAT	A	2028573	-7	proximal	10	8	yes	yes	yes	0,1,(9,0,0)	0,1,(7,0,0)	0,1,(9,0,0)	0,1,(7,0,0)	SRR957844(4;3),SRR957843(6;5),
I	2041304	-	TRANNYTRY	TA(A*CA)TTGT	A	2041295	-5	proximal	170	78	yes	yes	yes	20,13,(123,14,0)	13,10,(46,9,0)	1,4,(122,14,0)	1,4,(45,9,0)	SRR957843(87;38),SRR957842(1;1),SRR957844(79;36),SRR957841(3;3),
I	2190518	-	TRANNYTRY	TA(A*CC)CTTT	A	2190509	-5	proximal	6	2	yes	no	yes	0,0,(6,0,0)	0,0,(2,0,0)	0,0,(6,0,0)	0,0,(2,0,0)	SRR957844(6;2),
I	2348890	-	TRANNYTRY	TA(A*CT)TTTT	A	2348881	-5	proximal	24	19	yes	yes	yes	0,1,(23,0,0)	0,1,(18,0,0)	0,1,(22,0,0)	0,1,(17,0,0)	SRR957843(12;11),SRR957844(12;8),
I	2356164	-	TRANNYTRY	TA(AC*A)CTAC	C	2356154	-8	proximal	1	1	yes	no	yes	0,0,(0,1,0)	0,0,(0,1,0)	0,0,(0,1,0)	0,0,(0,1,0)	SRR957843(1;1),
I	2366273	-	TRANNYTRY	TA(A*CA)TAAT	A	2366264	-5	proximal	181	82	yes	yes	yes	10,5,(165,1,0)	7,5,(69,1,0)	9,0,(141,1,0)	6,0,(49,1,0)	SRR957844(76;36),SRR957843(105;46),
I	2401380	-	TRANNYTRY	TA(T*AT)ATAT	T	2401371	-5	proximal	1	1	no	no	yes	1,0,(0,0,0)	1,0,(0,0,0)	0,0,(0,0,0)	0,0,(0,0,0)	SRR957844(1;1),
I	2430473	-	TRANNYTRY	TA(A*CA)ATTT	A	2430459	-10	expected	4	4	yes	no	yes	0,0,(4,0,0)	0,0,(4,0,0)	0,0,(4,0,0)	0,0,(4,0,0)	SRR957844(4;4),
I	2481656	-	TRANNYTRY	TA(A*CA)TTTT	A	2481645	-7	proximal	26	23	yes	yes	yes	2,2,(22,0,0)	2,2,(19,0,0)	2,1,(20,0,0)	2,1,(17,0,0)	SRR957843(18;16),SRR957844(8;7),
I	2496641	-	TRANNYTRY	TA(A*TG)TTAG	A	2495267	-1370	distal	1	1	no	no	yes	1,0,(0,0,0)	1,0,(0,0,0)	0,0,(0,0,0)	0,0,(0,0,0)	SRR957843(1;1),
I	2517802	-	TRANNYTRY	AA(C*CA)TTGT	C	2517789	-9	expected	159	104	yes	yes	yes	21,138,(0,0,0)	16,88,(0,0,0)	9,94,(0,0,0)	6,56,(0,0,0)	SRR957843(93;59),SRR957844(66;45),
I	2746345	-	TRANNYTRY	TA(A*CT)TTGA	A	2746335	-6	proximal	648	161	yes	yes	yes	39,46,(556,7,0)	26,35,(93,7,0)	10,22,(548,6,0)	10,19,(85,6,0)	SRR957843(398;94),SRR957844(250;67),
I	2759298	-	TRANNYTRY	AA(CC*A)TTGT	C	2759292	-6	proximal	10	9	yes	yes	yes	0,10,(0,0,0)	0,9,(0,0,0)	0,10,(0,0,0)	0,9,(0,0,0)	SRR957844(2;2),SRR957843(8;7),
I	2776186	-	TRANNYTRY	TA(A*CT)TCAT	A	2776171	-11	expected	2	2	yes	yes	yes	0,1,(1,0,0)	0,1,(1,0,0)	0,0,(1,0,0)	0,0,(1,0,0)	SRR957843(1;1),SRR957844(1;1),
I	2785928	-	TRANNYTRY	TA(TC*A)TTAC	C	2785684	-242	distal	2	1	no	no	yes	0,0,(0,2,0)	0,0,(0,1,0)	0,0,(0,0,0)	0,0,(0,0,0)	SRR957843(2;1),
I	2799780	-	TRANNYTRY	TA(AT*T)CTTT	T	2799766	-14	expected	1	1	no	no	yes	0,1,(0,0,0)	0,1,(0,0,0)	0,0,(0,0,0)	0,0,(0,0,0)	SRR957844(1;1),
I	2828362	-	TRANNYTRY	TA(A*CA)CTAA	A	2828349	-9	expected	16	12	yes	yes	yes	1,3,(12,0,0)	1,2,(9,0,0)	1,1,(12,0,0)	1,1,(9,0,0)	SRR957844(10;7),SRR957843(6;5),
I	2892185	-	TRANNYTRY	TA(AT*G)TCGT	T	2892175	-8	proximal	6	5	yes	yes	yes	0,0,(0,6,0)	0,0,(0,5,0)	0,0,(0,1,0)	0,0,(0,1,0)	SRR957843(2;2),SRR957844(4;3),
I	3042921	-	TRANNYTRY	TA(A*CC)TAGA	A	3042909	-8	proximal	54	44	yes	yes	yes	9,5,(40,0,0)	8,5,(31,0,0)	2,3,(39,0,0)	2,3,(30,0,0)	SRR957844(26;23),SRR957843(28;21),
I	3050756	-	TRANNYTRY	TA(A*TT)TTTC	A	3050745	-7	proximal	12	11	yes	yes	yes	1,2,(9,0,0)	1,2,(8,0,0)	0,0,(9,0,0)	0,0,(8,0,0)	SRR957842(1;1),SRR957843(8;7),SRR957844(3;3),
I	3114287	-	TRANNYTRY	TA(A*CA)CTTT	A	3114276	-7	proximal	5	5	yes	yes	yes	0,0,(5,0,0)	0,0,(5,0,0)	0,0,(4,0,0)	0,0,(4,0,0)	SRR957844(3;3),SRR957843(2;2),
I	3162463	-	TRANNYTRY	TG(A*CT)TTGT	A	3162443	-16	expected	1	1	no	no	yes	1,0,(0,0,0)	1,0,(0,0,0)	0,0,(0,0,0)	0,0,(0,0,0)	SRR957843(1;1),
I	3175919	-	TRANNYTRY	TA(A*CG)CTAT	A	3175906	-9	expected	175	70	yes	yes	yes	3,9,(163,0,0)	2,7,(61,0,0)	0,2,(158,0,0)	0,2,(56,0,0)	SRR957843(100;36),SRR957844(75;34),
I	3179716	-	TRANNYTRY	TG(AC*C)TTGT	C	3179709	-5	proximal	1	1	yes	no	yes	0,0,(0,1,0)	0,0,(0,1,0)	0,0,(0,1,0)	0,0,(0,1,0)	SRR957843(1;1),
I	3258764	-	TRANNYTRY	TA(A*CC)TTTC	A	3258748	-12	expected	9	8	yes	yes	yes	1,0,(8,0,0)	1,0,(7,0,0)	0,0,(8,0,0)	0,0,(7,0,0)	SRR957844(4;3),SRR957843(5;5),
I	3259067	-	TRANNYTRY	TG(C*AT)TTAT	C	3259053	-10	expected	7	7	yes	yes	yes	7,0,(0,0,0)	7,0,(0,0,0)	1,0,(0,0,0)	1,0,(0,0,0)	SRR957844(3;3),SRR957843(4;4),
I	3393038	-	TRANNYTRY	GA(C*AT)TTAT	C	3393028	-6	proximal	8	7	yes	yes	yes	0,0,(8,0,0)	0,0,(7,0,0)	0,0,(8,0,0)	0,0,(7,0,0)	SRR957843(3;3),SRR957844(5;4),
I	3413306	-	TRANNYTRY	TA(A*CA)TTTT	A	3413295	-7	proximal	2	2	yes	yes	yes	0,0,(2,0,0)	0,0,(2,0,0)	0,0,(2,0,0)	0,0,(2,0,0)	SRR957843(1;1),SRR957844(1;1),
I	3452278	-	TRANNYTRY	TA(AC*T)TAAT	C	3452269	-7	proximal	1	1	yes	no	yes	0,0,(0,1,0)	0,0,(0,1,0)	0,0,(0,1,0)	0,0,(0,1,0)	SRR957842(1;1),
I	3493425	-	TRANNYTRY	TA(TC*A)TTAT	C	3493274	-149	distal	1	1	yes	no	yes	0,0,(0,1,0)	0,0,(0,1,0)	0,0,(0,1,0)	0,0,(0,1,0)	SRR957843(1;1),
I	3496998	-	TRANNYTRY	TA(A*CT)TTAT	A	3496988	-6	proximal	229	133	yes	yes	yes	44,38,(144,3,0)	31,28,(71,3,0)	29,8,(121,3,0)	21,8,(52,3,0)	SRR957843(129;77),SRR957844(100;56),
I	3497018	-	TRANNYTRY	TC(A*TG)TTAT	A	3496988	-26	expected	1	1	no	no	yes	0,0,(1,0,0)	0,0,(1,0,0)	0,0,(0,0,0)	0,0,(0,0,0)	SRR957843(1;1),
I	3497132	-	TRANNYTRY	TG(C*TG)TTGT	C	3496988	-140	distal	1	1	no	no	yes	0,0,(1,0,0)	0,0,(1,0,0)	0,0,(0,0,0)	0,0,(0,0,0)	SRR957844(1;1),
I	3584633	-	TRANNYTRY	AA(AA*G)TTAT	A	3583995	-636	distal	2	2	yes	no	yes	0,0,(0,2,0)	0,0,(0,2,0)	0,0,(0,1,0)	0,0,(0,1,0)	SRR957843(2;2),
I	3709358	-	TRANNYTRY	AA(C*CA)TTGC	C	3709346	-8	proximal	3	2	yes	yes	yes	0,0,(3,0,0)	0,0,(2,0,0)	0,0,(1,0,0)	0,0,(1,0,0)	SRR957843(1;1),SRR957844(2;1),
I	3735287	-	TRANNYTRY	TA(AC*C)ATAA	C	3735276	-9	proximal	2	2	yes	yes	yes	0,0,(0,2,0)	0,0,(0,2,0)	0,0,(0,2,0)	0,0,(0,2,0)	SRR957844(1;1),SRR957843(1;1),
I	3798234	-	TRANNYTRY	TA(A*CA)ATGT	A	3798226	-4	proximal	26	23	yes	yes	yes	2,6,(16,2,0)	2,6,(13,2,0)	0,1,(15,2,0)	0,1,(12,2,0)	SRR957844(11;10),SRR957843(15;13),
I	3814950	-	TRANNYTRY	TA(A*CT)CAAC	A	3814940	-6	proximal	14	11	yes	yes	yes	1,0,(13,0,0)	1,0,(10,0,0)	0,0,(12,0,0)	0,0,(9,0,0)	SRR957844(11;8),SRR957843(3;3),
I	3839166	-	TRANNYTRY	TA(AC*T)TGAA	C	3839157	-7	proximal	2	2	yes	no	yes	0,0,(0,2,0)	0,0,(0,2,0)	0,0,(0,2,0)	0,0,(0,2,0)	SRR957844(2;2),
I	3896708	-	TRANNYTRY	TG(A*CA)CTTT	A	3896696	-8	proximal	1	1	yes	no	yes	0,0,(1,0,0)	0,0,(1,0,0)	0,0,(1,0,0)	0,0,(1,0,0)	SRR957844(1;1),
I	3917111	-	TRANNYTRY	TA(A*CG)TTTG	A	3917102	-5	proximal	1	1	yes	no	yes	0,0,(1,0,0)	0,0,(1,0,0)	0,0,(1,0,0)	0,0,(1,0,0)	SRR957843(1;1),
I	3923898	-	TRANNYTRY	TA(A*AC)CTGT	A	3923885	-9	expected	37	28	yes	yes	yes	3,10,(23,1,0)	3,7,(17,1,0)	1,5,(20,0,0)	1,3,(14,0,0)	SRR957844(23;15),SRR957843(14;13),
I	3933849	-	TRANNYTRY	TA(A*CT)TTAT	A	3933838	-7	proximal	5	5	yes	yes	yes	2,0,(2,1,0)	2,0,(2,1,0)	0,0,(2,1,0)	0,0,(2,1,0)	SRR957843(3;3),SRR957844(2;2),
I	4055883	-	TRANNYTRY	TA(AC*C)CTTT	C	4055872	-9	proximal	1	1	yes	no	yes	0,0,(0,1,0)	0,0,(0,1,0)	0,0,(0,1,0)	0,0,(0,1,0)	SRR957844(1;1),
I	4066528	-	TRANNYTRY	TT(ACC*)GTAT	C	4066491	-37	expected	2	2	yes	yes	yes	0,0,(1,0,1)	0,0,(1,0,1)	0,0,(1,0,0)	0,0,(1,0,0)	SRR957844(1;1),SRR957843(1;1),
I	4091368	-	TRANNYTRY	TA(A*CT)CTTT	A	4091357	-7	proximal	15	15	yes	yes	yes	0,3,(12,0,0)	0,3,(12,0,0)	0,1,(12,0,0)	0,1,(12,0,0)	SRR957844(6;6),SRR957843(9;9),
I	4132934	-	TRANNYTRY	TA(AC*T)TTGA	C	4132923	-9	proximal	1	1	yes	no	yes	0,0,(0,1,0)	0,0,(0,1,0)	0,0,(0,1,0)	0,0,(0,1,0)	SRR957843(1;1),
I	4138731	-	TRANNYTRY	TA(AC*A)TTCC	C	4138718	-11	expected	1	1	yes	no	yes	0,0,(0,1,0)	0,0,(0,1,0)	0,0,(0,1,0)	0,0,(0,1,0)	SRR957844(1;1),
I	4426614	-	TRANNYTRY	TA(A*TC)TTAT	A	4426601	-9	expected	1	1	yes	no	yes	0,0,(1,0,0)	0,0,(1,0,0)	0,0,(1,0,0)	0,0,(1,0,0)	SRR957844(1;1),
I	4468778	-	TRANNYTRY	TA(AC*A)TTCG	C	4468768	-8	proximal	4	3	yes	yes	yes	0,0,(0,4,0)	0,0,(0,3,0)	0,0,(0,4,0)	0,0,(0,3,0)	SRR957843(2;1),SRR957844(2;2),
I	4548487	-	TRANNYTRY	TA(A*TG)CTAA	A	4548474	-9	expected	11	8	yes	yes	yes	0,1,(10,0,0)	0,1,(7,0,0)	0,0,(10,0,0)	0,0,(7,0,0)	SRR957843(3;3),SRR957844(8;5),
I	4558351	-	TRANNYTRY	TA(A*TC)ATAT	A	4558342	-5	proximal	8	6	yes	yes	yes	0,0,(8,0,0)	0,0,(6,0,0)	0,0,(8,0,0)	0,0,(6,0,0)	SRR957843(6;4),SRR957844(2;2),
I	4760664	-	TRANNYTRY	GA(C*CA)TTAT	C	4760651	-9	expected	4	4	yes	yes	yes	1,3,(0,0,0)	1,3,(0,0,0)	1,2,(0,0,0)	1,2,(0,0,0)	SRR957844(1;1),SRR957843(3;3),
I	4775078	-	TRANNYTRY	TA(A*CA)ATAA	A	4775067	-7	proximal	3	3	yes	yes	yes	0,0,(3,0,0)	0,0,(3,0,0)	0,0,(2,0,0)	0,0,(2,0,0)	SRR957843(2;2),SRR957844(1;1),
I	4825769	-	TRANNYTRY	TA(A*TT)TTTT	A	4825754	-11	expected	407	64	yes	yes	yes	9,9,(389,0,0)	8,7,(49,0,0)	0,0,(383,0,0)	0,0,(44,0,0)	SRR957843(259;37),SRR957844(148;27),
I	4835719	-	TRANNYTRY	TA(A*CT)TTAC	A	4835703	-12	expected	51	40	yes	yes	yes	5,6,(37,3,0)	4,6,(28,2,0)	0,2,(36,3,0)	0,2,(27,2,0)	SRR957843(28;25),SRR957844(23;15),
I	4861036	-	TRANNYTRY	TA(TC*A)TTGT	C	4861028	-8	proximal	1	1	yes	no	yes	0,1,(0,0,0)	0,1,(0,0,0)	0,1,(0,0,0)	0,1,(0,0,0)	SRR957843(1;1),
I	4861043	-	TRANNYTRY	TT(AA*C)TTAT	A	4861028	-13	expected	37	25	yes	yes	yes	0,2,(0,35,0)	0,2,(0,23,0)	0,0,(0,35,0)	0,0,(0,23,0)	SRR957843(22;16),SRR957844(15;9),
I	4863155	-	TRANNYTRY	TA(A*CG)TTTT	A	4863147	-4	proximal	1	1	yes	no	yes	0,0,(1,0,0)	0,0,(1,0,0)	0,0,(1,0,0)	0,0,(1,0,0)	SRR957844(1;1),
I	4929110	-	TRANNYTRY	TA(A*CA)TTAT	A	4929100	-6	proximal	19	19	yes	yes	yes	3,3,(13,0,0)	3,3,(13,0,0)	1,0,(12,0,0)	1,0,(12,0,0)	SRR957843(14;14),SRR957844(5;5),
I	4972707	-	TRANNYTRY	TT(A*TT)TTGC	A	4972662	-41	expected	1	1	yes	no	yes	0,0,(1,0,0)	0,0,(1,0,0)	0,0,(1,0,0)	0,0,(1,0,0)	SRR957843(1;1),
I	4993945	-	TRANNYTRY	TA(AC*A)CTCT	C	4993934	-9	proximal	1	1	yes	no	yes	0,0,(0,1,0)	0,0,(0,1,0)	0,0,(0,1,0)	0,0,(0,1,0)	SRR957844(1;1),
I	5008352	-	TRANNYTRY	TA(AC*T)TTAC	C	5008344	-6	proximal	18	13	yes	yes	yes	0,1,(14,3,0)	0,1,(9,3,0)	0,0,(14,3,0)	0,0,(9,3,0)	SRR957843(12;8),SRR957844(6;5),
I	5017258	-	TRANNYTRY	TA(AT*T)TTCA	T	5017252	-4	proximal	10	8	yes	yes	yes	0,0,(0,10,0)	0,0,(0,8,0)	0,0,(0,5,0)	0,0,(0,5,0)	SRR957843(6;5),SRR957844(2;2),SRR957841(2;1),
I	5044243	-	TRANNYTRY	TA(AC*T)TCAA	C	5044231	-10	expected	2	2	yes	yes	yes	0,0,(0,2,0)	0,0,(0,2,0)	0,0,(0,2,0)	0,0,(0,2,0)	SRR957844(1;1),SRR957843(1;1),
I	5044257	-	TRANNYTRY	TA(TAT*)GTAT	T	5044231	-26	expected	15	11	no	yes	yes	0,0,(0,0,15)	0,0,(0,0,11)	0,0,(0,0,0)	0,0,(0,0,0)	SRR957844(7;5),SRR957843(8;6),
I	5051792	-	TRANNYTRY	TA(A*TA)TCAT	A	5051779	-9	expected	11	11	yes	yes	yes	0,5,(6,0,0)	0,5,(6,0,0)	0,0,(2,0,0)	0,0,(2,0,0)	SRR957843(9;9),SRR957844(2;2),
I	5327843	-	TRANNYTRY	TA(A*CA)TTAT	A	5327829	-10	expected	21	20	yes	yes	yes	4,3,(14,0,0)	3,3,(14,0,0)	0,0,(12,0,0)	0,0,(12,0,0)	SRR957844(10;9),SRR957843(11;11),
I	5332299	-	TRANNYTRY	TA(A*CA)TTCC	A	5332283	-12	expected	190	56	yes	yes	yes	0,1,(189,0,0)	0,1,(55,0,0)	0,0,(187,0,0)	0,0,(53,0,0)	SRR957843(108;31),SRR957844(82;25),
I	5353433	-	TRANNYTRY	TA(T*GT)TTAC	T	5353425	-4	proximal	11	10	yes	yes	yes	1,10,(0,0,0)	1,9,(0,0,0)	0,6,(0,0,0)	0,5,(0,0,0)	SRR957843(7;6),SRR957844(4;4),
I	5353438	-	TRANNYTRY	TT(AA*C)TTAT	A	5353425	-11	expected	22	14	yes	yes	yes	0,0,(0,22,0)	0,0,(0,14,0)	0,0,(0,19,0)	0,0,(0,11,0)	SRR957843(15;10),SRR957844(7;4),
I	5358091	-	TRANNYTRY	TA(A*CC)CTGC	A	5358080	-7	proximal	5	4	yes	yes	yes	1,2,(2,0,0)	1,1,(2,0,0)	0,0,(2,0,0)	0,0,(2,0,0)	SRR957844(4;3),SRR957843(1;1),
I	5369791	-	TRANNYTRY	TA(AC*T)GTTT	C	5369782	-7	proximal	2	2	yes	no	yes	0,0,(0,2,0)	0,0,(0,2,0)	0,0,(0,2,0)	0,0,(0,2,0)	SRR957843(2;2),
I	5371553	-	TRANNYTRY	TG(A*CA)TAAT	A	5371540	-9	expected	6	6	yes	yes	yes	1,0,(5,0,0)	1,0,(5,0,0)	0,0,(5,0,0)	0,0,(5,0,0)	SRR957843(5;5),SRR957844(1;1),
I	5390728	-	TRANNYTRY	TA(A*TG)CTAA	A	5390707	-17	expected	7	7	yes	yes	yes	0,2,(5,0,0)	0,2,(5,0,0)	0,0,(5,0,0)	0,0,(5,0,0)	SRR957843(5;5),SRR957844(2;2),
I	5549832	-	TRANNYTRY	TA(A*CT)TAAT	A	5549819	-9	expected	2	1	yes	no	yes	0,0,(2,0,0)	0,0,(1,0,0)	0,0,(2,0,0)	0,0,(1,0,0)	SRR957843(2;1),
I	180880	+	TRANNYTRY	TA(A*CG)TTAC	A	180889	-5	proximal	19	14	yes	yes	yes	3,3,(11,2,0)	3,2,(8,1,0)	3,0,(11,0,0)	3,0,(8,0,0)	SRR957843(10;8),SRR957844(9;6),
I	190714	+	TRANNYTRY	TA(AC*T)TTAC	C	190729	-13	expected	31	27	yes	yes	yes	0,3,(26,2,0)	0,3,(22,2,0)	0,1,(26,2,0)	0,1,(22,2,0)	SRR957843(20;18),SRR957844(11;9),
I	366957	+	TRANNYTRY	TT(A*TA)TTAT	A	366967	-6	proximal	2	1	yes	no	yes	0,0,(2,0,0)	0,0,(1,0,0)	0,0,(2,0,0)	0,0,(1,0,0)	SRR957844(2;1),
I	367282	+	TRANNYTRY	TA(ACG*)TTTA	G	367292	-10	proximal	12	11	yes	yes	yes	0,0,(0,11,1)	0,0,(0,10,1)	0,0,(0,11,1)	0,0,(0,10,1)	SRR957844(3;3),SRR957843(9;8),
I	384463	+	TRANNYTRY	TA(A*CT)TTTT	A	384479	-12	expected	24	21	yes	yes	yes	4,9,(10,1,0)	4,7,(9,1,0)	4,5,(7,1,0)	4,3,(6,1,0)	SRR957844(10;8),SRR957843(14;13),
I	388710	+	TRANNYTRY	TA(A*CC)ATAA	A	388720	-6	proximal	9	8	yes	yes	yes	3,1,(5,0,0)	3,1,(4,0,0)	2,0,(5,0,0)	2,0,(4,0,0)	SRR957843(8;7),SRR957844(1;1),
I	415753	+	TRANNYTRY	TA(AC*A)TTTA	C	415762	-7	proximal	1	1	yes	no	yes	0,0,(0,1,0)	0,0,(0,1,0)	0,0,(0,1,0)	0,0,(0,1,0)	SRR957843(1;1),
I	521202	+	TRANNYTRY	TA(A*CA)TTTT	A	521214	-8	proximal	10	9	yes	yes	yes	0,1,(9,0,0)	0,1,(8,0,0)	0,0,(9,0,0)	0,0,(8,0,0)	SRR957844(3;3),SRR957843(7;6),
I	564544	+	TRANNYTRY	GA(C*AA)TTAT	C	564552	-4	proximal	19	14	yes	yes	yes	1,18,(0,0,0)	1,13,(0,0,0)	1,17,(0,0,0)	1,12,(0,0,0)	SRR957843(11;6),SRR957844(8;8),
I	684330	+	TRANNYTRY	TA(A*CT)TTTT	A	684344	-10	expected	312	136	yes	yes	yes	57,19,(229,7,0)	40,17,(73,6,0)	20,6,(225,0,0)	16,5,(69,0,0)	SRR957843(187;76),SRR957844(123;58),SRR957841(2;2),
I	711756	+	TRANNYTRY	TA(A*CA)TTCT	A	711767	-7	proximal	8	7	yes	yes	yes	0,1,(7,0,0)	0,1,(6,0,0)	0,0,(7,0,0)	0,0,(6,0,0)	SRR957843(7;6),SRR957844(1;1),
I	750103	+	TRANNYTRY	TA(A*TG)ATAT	A	750112	-5	proximal	1	1	no	no	yes	1,0,(0,0,0)	1,0,(0,0,0)	0,0,(0,0,0)	0,0,(0,0,0)	SRR957844(1;1),
I	895581	+	TRANNYTRY	TG(A*AC)TTAC	A	895596	-11	expected	1	1	yes	no	yes	1,0,(0,0,0)	1,0,(0,0,0)	1,0,(0,0,0)	1,0,(0,0,0)	SRR957843(1;1),
I	1008839	+	TRANNYTRY	TA(AT*T)CTCT	T	1008848	-7	proximal	1	1	no	no	yes	0,0,(0,1,0)	0,0,(0,1,0)	0,0,(0,0,0)	0,0,(0,0,0)	SRR957844(1;1),
I	1226022	+	TRANNYTRY	TA(ATA*)GTAC	A	1226038	-16	expected	1	1	no	no	yes	0,0,(0,0,1)	0,0,(0,0,1)	0,0,(0,0,0)	0,0,(0,0,0)	SRR957843(1;1),
I	1279937	+	TRANNYTRY	TA(A*CT)ATAT	A	1279952	-11	expected	1	1	yes	no	yes	0,0,(1,0,0)	0,0,(1,0,0)	0,0,(1,0,0)	0,0,(1,0,0)	SRR957843(1;1),
I	1578783	+	TRANNYTRY	TA(AC*T)ATGC	C	1578792	-7	proximal	14	12	yes	yes	yes	0,0,(0,14,0)	0,0,(0,12,0)	0,0,(0,14,0)	0,0,(0,12,0)	SRR957843(8;6),SRR957844(6;6),
I	1696815	+	TRANNYTRY	TA(A*CA)TTGA	A	1696831	-12	expected	39	27	yes	yes	yes	3,2,(34,0,0)	2,2,(23,0,0)	2,1,(34,0,0)	1,1,(23,0,0)	SRR957843(27;16),SRR957844(12;11),
I	1713146	+	TRANNYTRY	TA(AT*T)TTAC	T	1713156	-8	proximal	48	37	yes	yes	yes	1,12,(33,2,0)	1,12,(22,2,0)	0,4,(31,1,0)	0,4,(20,1,0)	SRR957843(25;22),SRR957844(23;15),
I	1777026	+	TRANNYTRY	TA(AC*C)CTCT	C	1777068	-40	expected	1	1	yes	no	yes	0,0,(0,1,0)	0,0,(0,1,0)	0,0,(0,1,0)	0,0,(0,1,0)	SRR957844(1;1),
I	1777054	+	TRANNYTRY	TA(AA*C)TAAC	A	1777068	-14	expected	1	1	no	no	yes	0,1,(0,0,0)	0,1,(0,0,0)	0,0,(0,0,0)	0,0,(0,0,0)	SRR957843(1;1),
I	1777057	+	TRANNYTRY	TA(A*CA)TTAT	A	1777068	-7	proximal	4	3	yes	yes	yes	1,0,(3,0,0)	1,0,(2,0,0)	0,0,(3,0,0)	0,0,(2,0,0)	SRR957843(4;3),
I	1786595	+	TRANNYTRY	TA(A*TT)CTAG	A	1786604	-5	proximal	2	2	yes	yes	yes	0,0,(2,0,0)	0,0,(2,0,0)	0,0,(2,0,0)	0,0,(2,0,0)	SRR957843(1;1),SRR957844(1;1),
I	1923171	+	TRANNYTRY	TA(A*CT)TTTA	A	1923192	-17	expected	1	1	yes	no	yes	0,0,(1,0,0)	0,0,(1,0,0)	0,0,(1,0,0)	0,0,(1,0,0)	SRR957843(1;1),
I	1977540	+	TRANNYTRY	TA(A*TC)TTAC	A	1977555	-11	expected	25	16	yes	yes	yes	1,2,(22,0,0)	1,1,(14,0,0)	0,0,(22,0,0)	0,0,(14,0,0)	SRR957843(12;8),SRR957844(13;8),
I	2145918	+	TRANNYTRY	TG(A*CT)TTTT	A	2145926	-4	proximal	9	8	yes	yes	yes	1,0,(8,0,0)	1,0,(7,0,0)	0,0,(8,0,0)	0,0,(7,0,0)	SRR957844(2;2),SRR957843(7;6),
I	2152690	+	TRANNYTRY	TA(ATA*)TTTT	A	2152698	-8	proximal	13	10	yes	yes	yes	0,0,(0,12,1)	0,0,(0,9,1)	0,0,(0,11,1)	0,0,(0,8,1)	SRR957844(6;4),SRR957843(7;6),
I	2216474	+	TRANNYTRY	TA(A*TG)TTTT	A	2216485	-7	proximal	267	65	yes	yes	yes	17,4,(245,1,0)	13,4,(47,1,0)	1,2,(242,0,0)	1,2,(45,0,0)	SRR957844(123;28),SRR957843(142;35),SRR957842(2;2),
I	2372088	+	TRANNYTRY	TA(A*CT)TTAT	A	2372102	-10	expected	127	84	yes	yes	yes	11,26,(89,1,0)	9,19,(55,1,0)	10,2,(81,1,0)	8,2,(48,1,0)	SRR957841(1;1),SRR957844(52;34),SRR957843(74;49),
I	2436457	+	TRANNYTRY	AA(A*TA)TTAC	A	2436466	-5	proximal	14	13	yes	yes	yes	5,9,(0,0,0)	5,8,(0,0,0)	0,7,(0,0,0)	0,6,(0,0,0)	SRR957844(7;6),SRR957843(7;7),
I	2440488	+	TRANNYTRY	TA(A*TG)CTAA	A	2440506	-14	expected	1	1	yes	no	yes	0,0,(1,0,0)	0,0,(1,0,0)	0,0,(1,0,0)	0,0,(1,0,0)	SRR957843(1;1),
I	2446043	+	TRANNYTRY	TA(A*AT)GTAT	A	2446051	-4	proximal	18	13	yes	yes	yes	0,0,(18,0,0)	0,0,(13,0,0)	0,0,(15,0,0)	0,0,(10,0,0)	SRR957844(8;6),SRR957843(10;7),
I	2606530	+	TRANNYTRY	TA(AC*T)ATGT	C	2606540	-8	proximal	3	2	yes	no	yes	0,0,(0,3,0)	0,0,(0,2,0)	0,0,(0,3,0)	0,0,(0,2,0)	SRR957843(3;2),
I	2608076	+	TRANNYTRY	AA(C*TA)TTGC	C	2608088	-8	proximal	2	1	yes	no	yes	0,0,(2,0,0)	0,0,(1,0,0)	0,0,(2,0,0)	0,0,(1,0,0)	SRR957843(2;1),
I	2638287	+	TRANNYTRY	TA(A*TC)TAAC	A	2638303	-12	expected	1	1	yes	no	yes	0,0,(1,0,0)	0,0,(1,0,0)	0,0,(1,0,0)	0,0,(1,0,0)	SRR957843(1;1),
I	2638292	+	TRANNYTRY	TA(A*CG)GTGT	A	2638303	-7	proximal	10	8	yes	yes	yes	0,1,(9,0,0)	0,1,(7,0,0)	0,1,(9,0,0)	0,1,(7,0,0)	SRR957843(6;6),SRR957844(4;2),
I	2690396	+	TRANNYTRY	TA(A*CA)GTGC	A	2690407	-7	proximal	9	9	yes	yes	yes	0,0,(9,0,0)	0,0,(9,0,0)	0,0,(9,0,0)	0,0,(9,0,0)	SRR957843(6;6),SRR957844(3;3),
I	2721733	+	TRANNYTRY	TA(A*CA)TTTT	A	2721747	-10	expected	56	41	yes	yes	yes	9,6,(41,0,0)	8,5,(28,0,0)	6,1,(39,0,0)	5,1,(26,0,0)	SRR957843(39;26),SRR957844(17;15),
I	2755179	+	TRANNYTRY	TA(A*CA)CTTT	A	2755191	-8	proximal	86	48	yes	yes	yes	0,10,(76,0,0)	0,8,(40,0,0)	0,1,(67,0,0)	0,1,(32,0,0)	SRR957844(56;30),SRR957843(30;18),
I	2762435	+	TRANNYTRY	TA(A*TT)GTTT	A	2762453	-14	expected	1	1	no	no	yes	0,0,(1,0,0)	0,0,(1,0,0)	0,0,(0,0,0)	0,0,(0,0,0)	SRR957843(1;1),
I	2762990	+	TRANNYTRY	TA(A*CA)ATAT	A	2763000	-6	proximal	8	7	yes	yes	yes	0,2,(6,0,0)	0,2,(5,0,0)	0,0,(4,0,0)	0,0,(3,0,0)	SRR957843(4;3),SRR957844(4;4),
I	2795281	+	TRANNYTRY	TG(AC*A)TTTT	C	2795289	-6	proximal	1	1	yes	no	yes	0,0,(0,1,0)	0,0,(0,1,0)	0,0,(0,1,0)	0,0,(0,1,0)	SRR957843(1;1),
I	2804373	+	TRANNYTRY	TA(A*CT)TGAT	A	2804387	-10	expected	47	30	yes	yes	yes	4,3,(40,0,0)	4,3,(23,0,0)	0,1,(37,0,0)	0,1,(20,0,0)	SRR957843(28;18),SRR957844(19;12),
I	2814920	+	TRANNYTRY	TA(AC*T)ACGT	C	2814927	-5	proximal	1	1	no	no	yes	0,0,(0,1,0)	0,0,(0,1,0)	0,0,(0,0,0)	0,0,(0,0,0)	SRR957843(1;1),
I	2830983	+	TRANNYTRY	TA(AC*T)TTAG	C	2830991	-6	proximal	3	2	yes	no	yes	0,0,(0,3,0)	0,0,(0,2,0)	0,0,(0,3,0)	0,0,(0,2,0)	SRR957843(3;2),
I	2885708	+	TRANNYTRY	TA(AC*A)AAAC	C	2885723	-15	expected	1	1	no	no	yes	0,1,(0,0,0)	0,1,(0,0,0)	0,0,(0,0,0)	0,0,(0,0,0)	SRR957843(1;1),
I	3087372	+	TRANNYTRY	TA(A*CA)TCAT	A	3087383	-7	proximal	43	29	yes	yes	yes	1,6,(36,0,0)	1,5,(23,0,0)	0,2,(32,0,0)	0,2,(20,0,0)	SRR957841(1;1),SRR957842(3;3),SRR957843(20;14),SRR957844(19;11),
I	3087689	+	TRANNYTRY	TA(A*CA)TTTT	A	3087703	-10	expected	3	3	yes	yes	yes	0,0,(3,0,0)	0,0,(3,0,0)	0,0,(2,0,0)	0,0,(2,0,0)	SRR957843(1;1),SRR957844(2;2),
I	3166575	+	TRANNYTRY	TA(A*TA)TTTC	A	3166587	-8	proximal	1	1	yes	no	yes	0,0,(1,0,0)	0,0,(1,0,0)	0,0,(1,0,0)	0,0,(1,0,0)	SRR957844(1;1),
I	3352969	+	TRANNYTRY	TA(A*CT)TTGT	A	3352984	-11	expected	15	14	yes	yes	yes	2,1,(10,2,0)	2,1,(9,2,0)	1,0,(9,2,0)	1,0,(8,2,0)	SRR957844(4;4),SRR957843(11;10),
I	3384620	+	TRANNYTRY	TA(A*CT)TTAT	A	3384744	-120	distal	1	1	yes	no	yes	0,0,(1,0,0)	0,0,(1,0,0)	0,0,(1,0,0)	0,0,(1,0,0)	SRR957843(1;1),
I	3388900	+	TRANNYTRY	TA(CA*A)CTAA	A	3388912	-12	expected	1	1	yes	no	yes	0,1,(0,0,0)	0,1,(0,0,0)	0,1,(0,0,0)	0,1,(0,0,0)	SRR957843(1;1),
I	3561245	+	TRANNYTRY	TA(A*CA)ATCT	A	3561256	-7	proximal	7	7	yes	yes	yes	0,0,(7,0,0)	0,0,(7,0,0)	0,0,(7,0,0)	0,0,(7,0,0)	SRR957844(3;3),SRR957843(4;4),
I	3612584	+	TRANNYTRY	TA(A*CT)GTAT	A	3612597	-9	expected	10	10	yes	yes	yes	1,2,(7,0,0)	1,2,(7,0,0)	0,0,(7,0,0)	0,0,(7,0,0)	SRR957843(5;5),SRR957844(5;5),
I	3659515	+	TRANNYTRY	TA(AC*T)TTAA	C	3659526	-9	proximal	3	3	yes	yes	yes	0,0,(0,3,0)	0,0,(0,3,0)	0,0,(0,2,0)	0,0,(0,2,0)	SRR957844(2;2),SRR957843(1;1),
I	3689310	+	TRANNYTRY	TG(A*CA)ATGT	A	3689321	-7	proximal	1	1	yes	no	yes	0,0,(1,0,0)	0,0,(1,0,0)	0,0,(1,0,0)	0,0,(1,0,0)	SRR957843(1;1),
I	3730894	+	TRANNYTRY	TA(AC*A)ATTT	C	3730903	-7	proximal	4	3	yes	no	yes	0,0,(0,4,0)	0,0,(0,3,0)	0,0,(0,4,0)	0,0,(0,3,0)	SRR957843(4;3),
I	3843757	+	TRANNYTRY	TA(A*CC)ATTC	A	3843765	-4	proximal	40	31	yes	yes	yes	4,1,(35,0,0)	4,1,(26,0,0)	2,0,(33,0,0)	2,0,(24,0,0)	SRR957844(13;12),SRR957843(27;19),
I	3844005	+	TRANNYTRY	TA(AC*T)TTAT	C	3844014	-7	proximal	21	18	yes	yes	yes	0,3,(17,1,0)	0,2,(15,1,0)	0,0,(17,1,0)	0,0,(15,1,0)	SRR957843(9;9),SRR957844(12;9),
I	3936584	+	TRANNYTRY	TA(A*CT)TTAT	A	3936596	-8	proximal	1	1	no	no	yes	1,0,(0,0,0)	1,0,(0,0,0)	0,0,(0,0,0)	0,0,(0,0,0)	SRR957843(1;1),
I	4057293	+	TRANNYTRY	TA(AC*A)TTCC	C	4057303	-8	proximal	1	1	yes	no	yes	0,0,(0,1,0)	0,0,(0,1,0)	0,0,(0,1,0)	0,0,(0,1,0)	SRR957844(1;1),
I	4083938	+	TRANNYTRY	TA(A*TG)TTAT	A	4083947	-5	proximal	14	14	yes	yes	yes	9,1,(4,0,0)	9,1,(4,0,0)	0,0,(2,0,0)	0,0,(2,0,0)	SRR957844(4;4),SRR957843(10;10),
I	4224566	+	TRANNYTRY	TA(A*CA)TTTT	A	4224581	-11	expected	689	228	yes	yes	yes	25,221,(417,26,0)	22,74,(111,21,0)	16,29,(330,21,0)	13,20,(62,16,0)	SRR957844(263;88),SRR957843(426;140),
I	4227309	+	TRANNYTRY	TA(AC*T)GTAT	C	4227316	-5	proximal	3	3	yes	yes	yes	0,0,(0,3,0)	0,0,(0,3,0)	0,0,(0,3,0)	0,0,(0,3,0)	SRR957844(1;1),SRR957843(2;2),
I	4383737	+	TRANNYTRY	TA(AC*T)TATT	C	4383749	-10	expected	1	1	yes	no	yes	0,0,(0,1,0)	0,0,(0,1,0)	0,0,(0,1,0)	0,0,(0,1,0)	SRR957844(1;1),
I	4405502	+	TRANNYTRY	TT(ACT*)GTAC	T	4405518	-16	expected	1	1	no	no	yes	0,0,(0,0,1)	0,0,(0,0,1)	0,0,(0,0,0)	0,0,(0,0,0)	SRR957843(1;1),
I	4415990	+	TRANNYTRY	TA(A*TC)CTCT	A	4416004	-10	expected	1	1	no	no	yes	1,0,(0,0,0)	1,0,(0,0,0)	0,0,(0,0,0)	0,0,(0,0,0)	SRR957844(1;1),
I	4501010	+	TRANNYTRY	TA(C*AA)TTTT	C	4501022	-8	proximal	1	1	no	no	yes	1,0,(0,0,0)	1,0,(0,0,0)	0,0,(0,0,0)	0,0,(0,0,0)	SRR957844(1;1),
I	4582860	+	TRANNYTRY	TA(A*CG)TTGT	A	4582868	-4	proximal	1	1	yes	no	yes	0,0,(1,0,0)	0,0,(1,0,0)	0,0,(1,0,0)	0,0,(1,0,0)	SRR957844(1;1),
I	4588859	+	TRANNYTRY	TA(A*CG)CTAC	A	4588868	-5	proximal	2	1	no	no	yes	0,0,(2,0,0)	0,0,(1,0,0)	0,0,(0,0,0)	0,0,(0,0,0)	SRR957843(2;1),
I	4645838	+	TRANNYTRY	TA(AC*T)AAGT	C	4645853	-13	expected	1	1	no	no	yes	0,0,(0,1,0)	0,0,(0,1,0)	0,0,(0,0,0)	0,0,(0,0,0)	SRR957843(1;1),
I	4723363	+	TRANNYTRY	TA(AC*A)ATAT	C	4723375	-10	expected	5	4	yes	yes	yes	0,0,(0,5,0)	0,0,(0,4,0)	0,0,(0,5,0)	0,0,(0,4,0)	SRR957843(3;2),SRR957844(2;2),
I	4723624	+	TRANNYTRY	TA(A*CG)TTAA	A	4723637	-9	expected	56	33	yes	yes	yes	4,4,(48,0,0)	3,4,(26,0,0)	1,2,(45,0,0)	1,2,(24,0,0)	SRR957843(36;20),SRR957844(20;13),
I	4745132	+	TRANNYTRY	TA(AC*T)TAGC	C	4745139	-5	proximal	3	3	yes	yes	yes	0,1,(1,1,0)	0,1,(1,1,0)	0,0,(1,1,0)	0,0,(1,1,0)	SRR957844(2;2),SRR957843(1;1),
I	4833244	+	TRANNYTRY	TA(A*CA)TTTA	A	4833256	-8	proximal	11	8	yes	yes	yes	0,0,(11,0,0)	0,0,(8,0,0)	0,0,(8,0,0)	0,0,(5,0,0)	SRR957843(7;4),SRR957844(4;4),
I	4870812	+	TRANNYTRY	TA(A*CC)TTAT	A	4870822	-6	proximal	24	16	yes	yes	yes	0,1,(23,0,0)	0,1,(15,0,0)	0,0,(23,0,0)	0,0,(15,0,0)	SRR957844(14;8),SRR957843(10;8),
I	4874371	+	TRANNYTRY	TA(AC*A)TTTC	C	4874383	-10	expected	3	3	yes	yes	yes	0,0,(0,3,0)	0,0,(0,3,0)	0,0,(0,2,0)	0,0,(0,2,0)	SRR957843(1;1),SRR957844(2;2),
I	4874587	+	TRANNYTRY	TG(AT*A)TTAA	T	4874604	-17	expected	1	1	yes	no	yes	0,1,(0,0,0)	0,1,(0,0,0)	0,1,(0,0,0)	0,1,(0,0,0)	SRR957843(1;1),
I	4902122	+	TRANNYTRY	TA(AC*A)ATGT	C	4902132	-8	proximal	1	1	yes	no	yes	0,0,(0,1,0)	0,0,(0,1,0)	0,0,(0,1,0)	0,0,(0,1,0)	SRR957843(1;1),
I	4951730	+	TRANNYTRY	TA(AT*T)TTTA	T	4951736	-4	proximal	2	2	yes	no	yes	0,0,(0,2,0)	0,0,(0,2,0)	0,0,(0,2,0)	0,0,(0,2,0)	SRR957843(2;2),
I	4955050	+	TRANNYTRY	TA(A*CC)TAAC	A	4955067	-13	expected	4	4	yes	yes	yes	2,1,(1,0,0)	2,1,(1,0,0)	0,0,(1,0,0)	0,0,(1,0,0)	SRR957843(4;4),
I	4997493	+	TRANNYTRY	TA(A*CG)TTTT	A	4997502	-5	proximal	4	4	yes	yes	yes	0,1,(3,0,0)	0,1,(3,0,0)	0,0,(3,0,0)	0,0,(3,0,0)	SRR957844(2;2),SRR957843(2;2),
I	5018378	+	TRANNYTRY	TA(AC*T)GTAT	C	5018392	-12	expected	1	1	yes	no	yes	0,0,(0,1,0)	0,0,(0,1,0)	0,0,(0,1,0)	0,0,(0,1,0)	SRR957843(1;1),
I	5299208	+	TRANNYTRY	TA(AC*T)TAGT	C	5299230	-20	expected	4	2	yes	no	yes	0,0,(0,4,0)	0,0,(0,2,0)	0,0,(0,4,0)	0,0,(0,2,0)	SRR957844(4;2),
I	5301103	+	TRANNYTRY	AC(A*CA)TTGT	A	5301115	-8	proximal	1	1	no	no	yes	1,0,(0,0,0)	1,0,(0,0,0)	0,0,(0,0,0)	0,0,(0,0,0)	SRR957844(1;1),
I	5329703	+	TRANNYTRY	TA(A*TT)GTAT	A	5329712	-5	proximal	1	1	yes	no	yes	0,0,(1,0,0)	0,0,(1,0,0)	0,0,(1,0,0)	0,0,(1,0,0)	SRR957844(1;1),
I	5383218	+	TRANNYTRY	TA(AC*A)TAAT	C	5383229	-9	proximal	11	9	yes	yes	yes	0,0,(0,11,0)	0,0,(0,9,0)	0,0,(0,11,0)	0,0,(0,9,0)	SRR957844(5;4),SRR957843(6;5),
II	234086	-	TRANNYTRY	TA(A*CA)TATC	A	234070	-12	expected	5	4	yes	yes	yes	0,0,(5,0,0)	0,0,(4,0,0)	0,0,(4,0,0)	0,0,(3,0,0)	SRR957843(3;2),SRR957844(2;2),
II	259714	-	TRANNYTRY	TA(AC*T)ATGA	C	259704	-8	proximal	6	5	yes	yes	yes	0,0,(0,6,0)	0,0,(0,5,0)	0,0,(0,6,0)	0,0,(0,5,0)	SRR957843(2;2),SRR957844(4;3),
II	296543	-	TRANNYTRY	TA(AC*T)TGTT	C	296533	-8	proximal	7	7	yes	yes	yes	0,0,(0,7,0)	0,0,(0,7,0)	0,0,(0,5,0)	0,0,(0,5,0)	SRR957844(2;2),SRR957843(5;5),
II	401695	-	TRANNYTRY	TA(A*CC)TTTT	A	401683	-8	proximal	9	9	yes	yes	yes	1,0,(8,0,0)	1,0,(8,0,0)	0,0,(8,0,0)	0,0,(8,0,0)	SRR957844(3;3),SRR957843(6;6),
II	401923	-	TRANNYTRY	TA(AC*A)CAGC	C	401910	-11	expected	1	1	yes	no	yes	0,0,(0,1,0)	0,0,(0,1,0)	0,0,(0,1,0)	0,0,(0,1,0)	SRR957843(1;1),
II	468426	-	TRANNYTRY	TA(A*CT)TTCT	A	468418	-4	proximal	3	3	yes	yes	yes	0,0,(3,0,0)	0,0,(3,0,0)	0,0,(3,0,0)	0,0,(3,0,0)	SRR957844(1;1),SRR957843(2;2),
II	525537	-	TRANNYTRY	TG(A*TT)TTAA	A	525525	-8	proximal	1	1	no	no	yes	1,0,(0,0,0)	1,0,(0,0,0)	0,0,(0,0,0)	0,0,(0,0,0)	SRR957843(1;1),
II	559487	-	TRANNYTRY	TA(A*CT)TTAC	A	559474	-9	expected	1	1	yes	no	yes	0,0,(1,0,0)	0,0,(1,0,0)	0,0,(1,0,0)	0,0,(1,0,0)	SRR957843(1;1),
II	560044	-	TRANNYTRY	TT(AC*T)TTTT	C	560028	-14	expected	1	1	yes	no	yes	0,0,(0,1,0)	0,0,(0,1,0)	0,0,(0,1,0)	0,0,(0,1,0)	SRR957843(1;1),
II	604107	-	TRANNYTRY	TA(A*CA)TTCC	A	604096	-7	proximal	47	27	yes	yes	yes	6,0,(40,1,0)	3,0,(23,1,0)	0,0,(39,1,0)	0,0,(22,1,0)	SRR957844(20;12),SRR957843(27;15),
II	632276	-	TRANNYTRY	TA(AC*A)CCAT	C	632267	-7	proximal	2	2	yes	yes	yes	0,0,(0,2,0)	0,0,(0,2,0)	0,0,(0,1,0)	0,0,(0,1,0)	SRR957843(1;1),SRR957844(1;1),
II	632445	-	TRANNYTRY	TA(A*CC)TTTA	A	632433	-8	proximal	1	1	yes	no	yes	1,0,(0,0,0)	1,0,(0,0,0)	1,0,(0,0,0)	1,0,(0,0,0)	SRR957843(1;1),
II	802757	-	TRANNYTRY	TT(A*TT)TTCT	A	802651	-102	distal	1	1	no	no	yes	0,0,(1,0,0)	0,0,(1,0,0)	0,0,(0,0,0)	0,0,(0,0,0)	SRR957844(1;1),
II	850719	-	TRANNYTRY	TA(A*CA)TTGG	A	850708	-7	proximal	1005	268	yes	yes	yes	149,264,(585,4,3)	61,70,(132,3,2)	128,13,(511,2,0)	43,10,(97,2,0)	SRR957841(1;1),SRR957843(627;153),SRR957842(1;1),SRR957844(376;113),
II	969880	-	TRANNYTRY	TA(A*CT)TTAT	A	969871	-5	proximal	3	3	yes	yes	yes	2,1,(0,0,0)	2,1,(0,0,0)	1,1,(0,0,0)	1,1,(0,0,0)	SRR957843(2;2),SRR957844(1;1),
II	1193664	-	TRANNYTRY	TA(A*CT)GTAT	A	1193656	-4	proximal	9	8	yes	yes	yes	1,0,(8,0,0)	1,0,(7,0,0)	0,0,(8,0,0)	0,0,(7,0,0)	SRR957844(7;6),SRR957843(2;2),
II	1284675	-	TRANNYTRY	TA(A*AT)ATTT	A	1284662	-9	expected	9	6	yes	yes	yes	1,1,(7,0,0)	1,1,(4,0,0)	0,0,(7,0,0)	0,0,(4,0,0)	SRR957844(6;3),SRR957843(3;3),
II	1361521	-	TRANNYTRY	TA(A*CC)TGAT	A	1361510	-7	proximal	1	1	yes	no	yes	0,0,(1,0,0)	0,0,(1,0,0)	0,0,(1,0,0)	0,0,(1,0,0)	SRR957843(1;1),
II	1362347	-	TRANNYTRY	TA(AC*A)TTTG	C	1362338	-9	proximal	1	1	yes	no	yes	0,1,(0,0,0)	0,1,(0,0,0)	0,1,(0,0,0)	0,1,(0,0,0)	SRR957843(1;1),
II	1377925	-	TRANNYTRY	TA(A*TA)CTAA	A	1377909	-12	expected	2	2	yes	no	yes	0,0,(2,0,0)	0,0,(2,0,0)	0,0,(2,0,0)	0,0,(2,0,0)	SRR957843(2;2),
II	1384684	-	TRANNYTRY	TA(A*CA)TTTC	A	1381143	-3537	distal	5	4	yes	yes	yes	2,0,(3,0,0)	1,0,(3,0,0)	2,0,(0,0,0)	1,0,(0,0,0)	SRR957843(3;3),SRR957844(2;1),
II	1384749	-	TRANNYTRY	TA(A*CA)TTTC	A	1384738	-7	proximal	15	13	yes	yes	yes	4,2,(9,0,0)	4,2,(7,0,0)	4,0,(6,0,0)	4,0,(5,0,0)	SRR957843(8;7),SRR957844(7;6),
II	1535475	-	TRANNYTRY	TA(AC*A)TGCT	C	1535464	-9	proximal	26	23	yes	yes	yes	0,0,(0,26,0)	0,0,(0,23,0)	0,0,(0,24,0)	0,0,(0,21,0)	SRR957843(15;13),SRR957844(11;10),
II	1649482	-	TRANNYTRY	TG(AC*T)TTCT	C	1649472	-8	proximal	3	3	yes	yes	yes	0,0,(1,2,0)	0,0,(1,2,0)	0,0,(0,2,0)	0,0,(0,2,0)	SRR957843(2;2),SRR957844(1;1),
II	1764563	-	TRANNYTRY	TA(A*CA)TTGC	A	1764553	-6	proximal	5	4	yes	yes	yes	0,1,(4,0,0)	0,1,(3,0,0)	0,0,(4,0,0)	0,0,(3,0,0)	SRR957843(4;3),SRR957844(1;1),
II	1776566	-	TRANNYTRY	TA(A*CT)CAAT	A	1776549	-13	expected	238	105	yes	yes	yes	38,37,(162,1,0)	28,27,(49,1,0)	17,4,(153,1,0)	13,4,(40,1,0)	SRR957844(87;44),SRR957843(151;61),
II	1785760	-	TRANNYTRY	TA(AC*A)TGTC	C	1785748	-10	expected	3	3	yes	yes	yes	0,0,(0,3,0)	0,0,(0,3,0)	0,0,(0,3,0)	0,0,(0,3,0)	SRR957843(1;1),SRR957844(2;2),
II	1937956	-	TRANNYTRY	TA(GA*A)CTGT	A	1934025	-3931	distal	3	2	no	yes	yes	0,3,(0,0,0)	0,2,(0,0,0)	0,0,(0,0,0)	0,0,(0,0,0)	SRR957843(1;1),SRR957844(2;1),
II	2162414	-	TRANNYTRY	TA(A*CA)TTTT	A	2162256	-154	distal	6	6	yes	yes	yes	0,0,(6,0,0)	0,0,(6,0,0)	0,0,(5,0,0)	0,0,(5,0,0)	SRR957843(1;1),SRR957844(5;5),
II	2184109	-	TRANNYTRY	TA(AC*T)TTTG	C	2184098	-9	proximal	1	1	yes	no	yes	0,0,(0,1,0)	0,0,(0,1,0)	0,0,(0,1,0)	0,0,(0,1,0)	SRR957843(1;1),
II	2264910	-	TRANNYTRY	TA(AA*T)GTTT	A	2264873	-37	expected	1	1	yes	no	yes	0,1,(0,0,0)	0,1,(0,0,0)	0,1,(0,0,0)	0,1,(0,0,0)	SRR957844(1;1),
II	2293784	-	TRANNYTRY	TA(A*CA)ATTC	A	2293775	-5	proximal	29	21	yes	yes	yes	4,1,(24,0,0)	4,1,(16,0,0)	0,0,(23,0,0)	0,0,(15,0,0)	SRR957843(24;17),SRR957844(5;4),
II	2342807	-	TRANNYTRY	TA(A*CA)AAAT	A	2342790	-13	expected	13	8	yes	yes	yes	0,3,(10,0,0)	0,2,(6,0,0)	0,0,(10,0,0)	0,0,(6,0,0)	SRR957844(6;4),SRR957843(7;4),
II	2450525	-	TRANNYTRY	TC(A*TT)TTAC	A	2450505	-16	expected	1	1	yes	no	yes	0,0,(1,0,0)	0,0,(1,0,0)	0,0,(1,0,0)	0,0,(1,0,0)	SRR957843(1;1),
II	2592316	-	TRANNYTRY	TA(AC*T)ATAT	C	2592305	-9	proximal	5	4	yes	yes	yes	0,0,(0,5,0)	0,0,(0,4,0)	0,0,(0,5,0)	0,0,(0,4,0)	SRR957844(3;2),SRR957843(2;2),
II	2592854	-	TRANNYTRY	TA(AT*T)AGAT	T	2592846	-6	proximal	1	1	no	no	yes	0,0,(0,1,0)	0,0,(0,1,0)	0,0,(0,0,0)	0,0,(0,0,0)	SRR957843(1;1),
II	2608115	-	TRANNYTRY	TA(A*CC)CTAG	A	2608105	-6	proximal	90	55	yes	yes	yes	0,12,(78,0,0)	0,9,(46,0,0)	0,2,(76,0,0)	0,2,(45,0,0)	SRR957844(32;18),SRR957843(58;37),
II	2672066	-	TRANNYTRY	TA(A*TG)TTCT	A	2672035	-27	expected	1	1	yes	no	yes	0,0,(1,0,0)	0,0,(1,0,0)	0,0,(1,0,0)	0,0,(1,0,0)	SRR957843(1;1),
II	2672515	-	TRANNYTRY	TA(A*CA)ATTT	A	2672507	-4	proximal	2	2	yes	no	yes	0,0,(2,0,0)	0,0,(2,0,0)	0,0,(2,0,0)	0,0,(2,0,0)	SRR957843(2;2),
II	2720597	-	TRANNYTRY	TA(AC*A)TCTT	C	2720590	-5	proximal	1	1	yes	no	yes	0,0,(0,1,0)	0,0,(0,1,0)	0,0,(0,1,0)	0,0,(0,1,0)	SRR957843(1;1),
II	2749523	-	TRANNYTRY	TA(AT*T)TTTA	T	2749517	-4	proximal	1	1	no	no	yes	0,0,(0,1,0)	0,0,(0,1,0)	0,0,(0,0,0)	0,0,(0,0,0)	SRR957844(1;1),
II	2793736	-	TRANNYTRY	TA(AC*C)ATGA	C	2793727	-7	proximal	1	1	yes	no	yes	0,0,(0,1,0)	0,0,(0,1,0)	0,0,(0,1,0)	0,0,(0,1,0)	SRR957844(1;1),
II	2811292	-	TRANNYTRY	TA(A*CA)TTAA	A	2811256	-32	expected	1	1	no	no	yes	0,0,(1,0,0)	0,0,(1,0,0)	0,0,(0,0,0)	0,0,(0,0,0)	SRR957843(1;1),
II	2920846	-	TRANNYTRY	TA(A*CT)CTTC	A	2920833	-9	expected	7	6	yes	yes	yes	0,1,(6,0,0)	0,1,(5,0,0)	0,0,(5,0,0)	0,0,(4,0,0)	SRR957844(5;4),SRR957843(2;2),
II	3058071	-	TRANNYTRY	TA(A*CA)CAGC	A	3058060	-7	proximal	11	7	yes	yes	yes	1,2,(8,0,0)	1,2,(4,0,0)	0,0,(8,0,0)	0,0,(4,0,0)	SRR957844(3;2),SRR957843(8;5),
II	3065059	-	TRANNYTRY	TA(A*AA)TTAC	A	3065032	-23	expected	1	1	no	no	yes	1,0,(0,0,0)	1,0,(0,0,0)	0,0,(0,0,0)	0,0,(0,0,0)	SRR957843(1;1),
II	3101964	-	TRANNYTRY	TA(A*CG)TTTT	A	3101953	-7	proximal	6	6	yes	yes	yes	1,0,(5,0,0)	1,0,(5,0,0)	0,0,(5,0,0)	0,0,(5,0,0)	SRR957843(3;3),SRR957844(3;3),
II	3111986	-	TRANNYTRY	TA(A*CA)TTTT	A	3111972	-10	expected	4	2	yes	no	yes	0,0,(4,0,0)	0,0,(2,0,0)	0,0,(4,0,0)	0,0,(2,0,0)	SRR957843(4;2),
II	3208178	-	TRANNYTRY	TA(A*CT)ATAT	A	3208166	-8	proximal	42	30	yes	yes	yes	1,0,(41,0,0)	1,0,(29,0,0)	1,0,(41,0,0)	1,0,(29,0,0)	SRR957843(23;19),SRR957844(19;11),
II	3229877	-	TRANNYTRY	TA(A*CG)ATAT	A	3229866	-7	proximal	9	8	yes	yes	yes	2,0,(6,1,0)	2,0,(5,1,0)	0,0,(6,1,0)	0,0,(5,1,0)	SRR957844(4;4),SRR957843(5;4),
II	3250343	-	TRANNYTRY	TA(A*CA)TAAT	A	3250332	-7	proximal	13	9	yes	yes	yes	2,1,(10,0,0)	1,1,(7,0,0)	2,1,(10,0,0)	1,1,(7,0,0)	SRR957843(2;2),SRR957844(11;7),
II	3250939	-	TRANNYTRY	TA(A*CA)CAAT	A	3250927	-8	proximal	1	1	yes	no	yes	0,0,(1,0,0)	0,0,(1,0,0)	0,0,(1,0,0)	0,0,(1,0,0)	SRR957841(1;1),
II	3252809	-	TRANNYTRY	TA(AC*A)ATAT	C	3252799	-8	proximal	1	1	yes	no	yes	0,0,(0,1,0)	0,0,(0,1,0)	0,0,(0,1,0)	0,0,(0,1,0)	SRR957843(1;1),
II	3322746	-	TRANNYTRY	TA(A*TC)CTTT	A	3322734	-8	proximal	9	5	yes	yes	yes	0,0,(9,0,0)	0,0,(5,0,0)	0,0,(9,0,0)	0,0,(5,0,0)	SRR957844(6;3),SRR957843(3;2),
II	3378194	-	TRANNYTRY	TA(A*CA)CTAT	A	3378183	-7	proximal	6	6	yes	yes	yes	1,0,(5,0,0)	1,0,(5,0,0)	0,0,(5,0,0)	0,0,(5,0,0)	SRR957844(4;4),SRR957843(2;2),
II	3412402	-	TRANNYTRY	TG(AC*A)CTTT	C	3412392	-8	proximal	1	1	yes	no	yes	0,0,(0,1,0)	0,0,(0,1,0)	0,0,(0,1,0)	0,0,(0,1,0)	SRR957843(1;1),
II	3620280	-	TRANNYTRY	TA(A*CA)TTAT	A	3620272	-4	proximal	105	74	yes	yes	yes	14,25,(66,0,0)	11,17,(46,0,0)	1,1,(26,0,0)	1,1,(17,0,0)	SRR957843(60;41),SRR957844(45;33),
II	3663215	-	TRANNYTRY	TA(AC*T)TTTT	C	3663206	-7	proximal	2	2	yes	no	yes	0,0,(0,2,0)	0,0,(0,2,0)	0,0,(0,2,0)	0,0,(0,2,0)	SRR957844(2;2),
II	3713246	-	TRANNYTRY	TA(A*AT)ATAA	A	3713237	-5	proximal	1	1	yes	no	yes	1,0,(0,0,0)	1,0,(0,0,0)	1,0,(0,0,0)	1,0,(0,0,0)	SRR957842(1;1),
II	3776758	-	TRANNYTRY	TA(A*TT)TTTT	A	3776749	-5	proximal	1	1	yes	no	yes	0,0,(1,0,0)	0,0,(1,0,0)	0,0,(1,0,0)	0,0,(1,0,0)	SRR957844(1;1),
II	3812004	-	TRANNYTRY	TA(A*TT)TTAT	A	3811992	-8	proximal	79	39	yes	yes	yes	3,3,(71,2,0)	3,3,(31,2,0)	0,0,(70,0,0)	0,0,(30,0,0)	SRR957844(27;13),SRR957842(1;1),SRR957843(51;25),
II	3874632	-	TRANNYTRY	TA(AC*T)TCTT	C	3874461	-169	distal	3	3	yes	no	yes	0,0,(0,3,0)	0,0,(0,3,0)	0,0,(0,2,0)	0,0,(0,2,0)	SRR957843(3;3),
II	3874677	-	TRANNYTRY	TA(A*CT)CAAT	A	3874461	-212	distal	4	4	yes	yes	yes	1,0,(3,0,0)	1,0,(3,0,0)	1,0,(3,0,0)	1,0,(3,0,0)	SRR957843(3;3),SRR957844(1;1),
II	3955757	-	TRANNYTRY	TA(A*CG)TTTT	A	3955744	-9	expected	1	1	no	no	yes	1,0,(0,0,0)	1,0,(0,0,0)	0,0,(0,0,0)	0,0,(0,0,0)	SRR957843(1;1),
II	4009645	-	TRANNYTRY	TA(A*CT)TTAT	A	4009637	-4	proximal	9	9	yes	yes	yes	0,0,(9,0,0)	0,0,(9,0,0)	0,0,(9,0,0)	0,0,(9,0,0)	SRR957844(4;4),SRR957843(5;5),
II	4120437	-	TRANNYTRY	TA(TAT*)GTAT	T	4120417	-20	expected	1	1	no	no	yes	0,0,(0,0,1)	0,0,(0,0,1)	0,0,(0,0,0)	0,0,(0,0,0)	SRR957844(1;1),
II	4180091	-	TRANNYTRY	TA(AC*G)GTTT	C	4180082	-7	proximal	5	4	yes	yes	yes	0,0,(0,5,0)	0,0,(0,4,0)	0,0,(0,5,0)	0,0,(0,4,0)	SRR957843(2;2),SRR957844(3;2),
II	4184197	-	TRANNYTRY	TG(A*CT)TTTT	A	4184185	-8	proximal	90	53	yes	yes	yes	47,3,(39,0,1)	23,3,(26,0,1)	1,2,(36,0,0)	1,2,(23,0,0)	SRR957844(39;24),SRR957843(50;28),SRR957842(1;1),
II	4241868	-	TRANNYTRY	TA(AT*T)ATCT	T	4241858	-8	proximal	1	1	no	no	yes	0,0,(0,1,0)	0,0,(0,1,0)	0,0,(0,0,0)	0,0,(0,0,0)	SRR957843(1;1),
II	4331566	-	TRANNYTRY	TA(AC*C)ATAT	C	4331555	-9	proximal	7	6	yes	yes	yes	0,0,(0,7,0)	0,0,(0,6,0)	0,0,(0,7,0)	0,0,(0,6,0)	SRR957844(3;2),SRR957843(4;4),
II	4385394	-	TRANNYTRY	TA(AC*T)AAAC	C	4385387	-7	proximal	1	1	no	no	yes	0,1,(0,0,0)	0,1,(0,0,0)	0,0,(0,0,0)	0,0,(0,0,0)	SRR957843(1;1),
II	4387016	-	TRANNYTRY	TA(A*CA)TATT	A	4387005	-7	proximal	92	68	yes	yes	yes	22,11,(59,0,0)	20,8,(40,0,0)	4,3,(56,0,0)	4,3,(37,0,0)	SRR957844(38;30),SRR957843(52;36),SRR957842(2;2),
II	187570	+	TRANNYTRY	TA(A*CA)CTTT	A	187580	-6	proximal	8	8	yes	yes	yes	2,2,(4,0,0)	2,2,(4,0,0)	0,0,(1,0,0)	0,0,(1,0,0)	SRR957843(6;6),SRR957844(2;2),
II	225279	+	TRANNYTRY	TA(AT*G)CTAA	T	225298	-17	expected	1	1	no	no	yes	0,0,(0,1,0)	0,0,(0,1,0)	0,0,(0,0,0)	0,0,(0,0,0)	SRR957843(1;1),
II	230603	+	TRANNYTRY	TA(AC*T)TTTT	C	230615	-10	expected	2	2	yes	no	yes	0,0,(0,2,0)	0,0,(0,2,0)	0,0,(0,2,0)	0,0,(0,2,0)	SRR957843(2;2),
II	267952	+	TRANNYTRY	TG(AT*T)TTAA	T	267967	-13	expected	1	1	no	no	yes	0,0,(0,1,0)	0,0,(0,1,0)	0,0,(0,0,0)	0,0,(0,0,0)	SRR957843(1;1),
II	420650	+	TRANNYTRY	TA(AC*G)TCAT	C	420661	-9	proximal	1	1	yes	no	yes	0,0,(0,1,0)	0,0,(0,1,0)	0,0,(0,1,0)	0,0,(0,1,0)	SRR957842(1;1),
II	433192	+	TRANNYTRY	TA(A*TT)ATAT	A	433203	-7	proximal	493	102	yes	yes	yes	21,28,(442,2,0)	17,23,(60,2,0)	0,8,(437,0,0)	0,7,(55,0,0)	SRR957844(201;37),SRR957842(10;5),SRR957843(279;57),SRR957841(3;3),
II	535533	+	TRANNYTRY	TA(AGA*)TTGT	A	535631	-98	distal	2	2	yes	yes	yes	0,0,(0,1,1)	0,0,(0,1,1)	0,0,(0,1,0)	0,0,(0,1,0)	SRR957843(2;2),
II	556825	+	TRANNYTRY	TA(AC*G)TTAC	C	556845	-18	expected	1	1	yes	no	yes	0,0,(0,1,0)	0,0,(0,1,0)	0,0,(0,1,0)	0,0,(0,1,0)	SRR957844(1;1),
II	578715	+	TRANNYTRY	TA(AC*T)CTTT	C	578724	-7	proximal	4	4	yes	yes	yes	0,0,(0,4,0)	0,0,(0,4,0)	0,0,(0,4,0)	0,0,(0,4,0)	SRR957844(1;1),SRR957843(3;3),
II	677042	+	TRANNYTRY	TA(A*TA)TAAT	A	677056	-10	expected	230	57	yes	yes	yes	9,7,(214,0,0)	8,7,(42,0,0)	0,3,(213,0,0)	0,3,(41,0,0)	SRR957844(83;23),SRR957843(147;34),
II	715519	+	TRANNYTRY	TA(A*CA)TGAT	A	715531	-8	proximal	177	104	yes	yes	yes	48,40,(89,0,0)	29,24,(51,0,0)	16,3,(62,0,0)	13,2,(37,0,0)	SRR957844(89;51),SRR957843(88;53),
II	715966	+	TRANNYTRY	TA(A*CA)GCAT	A	715980	-10	expected	79	61	yes	yes	yes	18,21,(35,5,0)	14,19,(24,4,0)	3,8,(33,5,0)	3,8,(22,4,0)	SRR957844(29;25),SRR957843(50;36),
II	731015	+	TRANNYTRY	TA(A*CA)TAGT	A	731025	-6	proximal	145	79	yes	yes	yes	22,9,(114,0,0)	16,8,(55,0,0)	11,2,(109,0,0)	8,2,(50,0,0)	SRR957843(77;41),SRR957844(68;38),
II	735371	+	TRANNYTRY	TA(AC*C)ATAA	C	735383	-10	expected	2	2	yes	no	yes	0,0,(0,2,0)	0,0,(0,2,0)	0,0,(0,2,0)	0,0,(0,2,0)	SRR957843(2;2),
II	771659	+	TRANNYTRY	TA(A*TA)CCAT	A	771755	-92	distal	10	10	yes	yes	yes	0,0,(10,0,0)	0,0,(10,0,0)	0,0,(8,0,0)	0,0,(8,0,0)	SRR957844(6;6),SRR957843(4;4),
II	886720	+	TRANNYTRY	TA(A*CA)ATAT	A	886729	-5	proximal	1	1	yes	no	yes	0,0,(1,0,0)	0,0,(1,0,0)	0,0,(1,0,0)	0,0,(1,0,0)	SRR957843(1;1),
II	943348	+	TRANNYTRY	TA(A*CT)TTAT	A	943360	-8	proximal	54	22	yes	yes	yes	0,1,(53,0,0)	0,1,(21,0,0)	0,0,(53,0,0)	0,0,(21,0,0)	SRR957843(39;15),SRR957844(15;7),
II	1047774	+	TRANNYTRY	TG(AC*T)TTAT	C	1047787	-11	expected	1	1	yes	no	yes	0,0,(0,1,0)	0,0,(0,1,0)	0,0,(0,1,0)	0,0,(0,1,0)	SRR957844(1;1),
II	1056046	+	TRANNYTRY	TA(A*CC)TCAT	A	1056054	-4	proximal	5	3	yes	yes	yes	0,0,(5,0,0)	0,0,(3,0,0)	0,0,(5,0,0)	0,0,(3,0,0)	SRR957844(3;1),SRR957843(2;2),
II	1074807	+	TRANNYTRY	TA(A*CG)TTTG	A	1074819	-8	proximal	8	8	yes	yes	yes	0,1,(7,0,0)	0,1,(7,0,0)	0,1,(7,0,0)	0,1,(7,0,0)	SRR957841(1;1),SRR957844(3;3),SRR957843(4;4),
II	1233676	+	TRANNYTRY	TA(AC*T)ATTC	C	1233687	-9	proximal	4	4	yes	yes	yes	0,0,(0,4,0)	0,0,(0,4,0)	0,0,(0,4,0)	0,0,(0,4,0)	SRR957844(2;2),SRR957843(2;2),
II	1286437	+	TRANNYTRY	TA(A*CG)TTAC	A	1286447	-6	proximal	11	8	yes	yes	yes	4,0,(7,0,0)	3,0,(5,0,0)	0,0,(6,0,0)	0,0,(4,0,0)	SRR957843(11;8),
II	1348790	+	TRANNYTRY	TG(A*CT)TTGA	A	1348800	-6	proximal	23	17	yes	yes	yes	14,1,(8,0,0)	10,1,(6,0,0)	0,1,(8,0,0)	0,1,(6,0,0)	SRR957843(13;10),SRR957844(10;7),
II	1403797	+	TRANNYTRY	TG(A*CC)TTAC	A	1403811	-10	expected	2	2	yes	no	yes	0,0,(2,0,0)	0,0,(2,0,0)	0,0,(2,0,0)	0,0,(2,0,0)	SRR957843(2;2),
II	1416637	+	TRANNYTRY	CA(TT*T)TTGT	T	1416719	-80	distal	2	1	no	no	yes	0,0,(0,2,0)	0,0,(0,1,0)	0,0,(0,0,0)	0,0,(0,0,0)	SRR957843(2;1),
II	1460750	+	TRANNYTRY	TA(A*CA)AAGT	A	1460761	-7	proximal	51	39	yes	yes	yes	4,13,(34,0,0)	3,10,(26,0,0)	3,8,(33,0,0)	2,6,(25,0,0)	SRR957843(32;25),SRR957844(19;14),
II	1501080	+	TRANNYTRY	TA(AC*C)GTTT	C	1501087	-5	proximal	6	5	yes	yes	yes	0,0,(0,6,0)	0,0,(0,5,0)	0,0,(0,6,0)	0,0,(0,5,0)	SRR957843(3;2),SRR957844(3;3),
II	1537252	+	TRANNYTRY	TT(AA*C)TTGT	A	1537266	-12	expected	102	48	yes	yes	yes	0,1,(11,90,0)	0,1,(9,38,0)	0,1,(2,88,0)	0,1,(2,36,0)	SRR957843(63;28),SRR957844(39;20),
II	1547214	+	TRANNYTRY	TA(C*CT)TTGC	C	1547319	-101	distal	1	1	yes	no	yes	0,0,(1,0,0)	0,0,(1,0,0)	0,0,(1,0,0)	0,0,(1,0,0)	SRR957843(1;1),
II	1591374	+	TRANNYTRY	TA(TC*G)TTTT	C	1591381	-7	proximal	2	1	yes	no	yes	0,2,(0,0,0)	0,1,(0,0,0)	0,2,(0,0,0)	0,1,(0,0,0)	SRR957843(2;1),
II	1695916	+	TRANNYTRY	TA(A*TT)TTTA	A	1695923	-3	proximal	5	4	yes	yes	yes	0,0,(5,0,0)	0,0,(4,0,0)	0,0,(5,0,0)	0,0,(4,0,0)	SRR957844(3;2),SRR957843(2;2),
II	1700484	+	TRANNYTRY	TA(AT*G)CTAC	T	1700497	-11	expected	1	1	no	no	yes	0,0,(0,1,0)	0,0,(0,1,0)	0,0,(0,0,0)	0,0,(0,0,0)	SRR957843(1;1),
II	1707757	+	TRANNYTRY	TA(AC*C)TTTA	C	1707763	-4	proximal	17	13	yes	yes	yes	0,0,(0,17,0)	0,0,(0,13,0)	0,0,(0,17,0)	0,0,(0,13,0)	SRR957844(3;3),SRR957843(14;10),
II	1729462	+	TRANNYTRY	TA(A*CA)TTTG	A	1729477	-11	expected	42	26	yes	yes	yes	2,8,(32,0,0)	2,5,(19,0,0)	0,0,(25,0,0)	0,0,(13,0,0)	SRR957843(31;19),SRR957844(11;7),
II	1770224	+	TRANNYTRY	TA(A*CT)GTAC	A	1770237	-9	expected	161	75	yes	yes	yes	15,9,(137,0,0)	14,8,(53,0,0)	6,2,(134,0,0)	6,2,(50,0,0)	SRR957843(96;43),SRR957844(65;32),
II	1794446	+	TRANNYTRY	TA(A*CA)TTTG	A	1794492	-42	expected	7	5	no	yes	yes	7,0,(0,0,0)	5,0,(0,0,0)	0,0,(0,0,0)	0,0,(0,0,0)	SRR957844(3;2),SRR957843(4;3),
II	1794482	+	TRANNYTRY	TG(A*TT)TTTT	A	1794492	-6	proximal	15	12	no	yes	yes	15,0,(0,0,0)	12,0,(0,0,0)	0,0,(0,0,0)	0,0,(0,0,0)	SRR957843(8;7),SRR957844(7;5),
II	1806717	+	TRANNYTRY	TA(A*CC)TCTC	A	1806728	-7	proximal	6	6	yes	yes	yes	0,2,(4,0,0)	0,2,(4,0,0)	0,1,(2,0,0)	0,1,(2,0,0)	SRR957844(2;2),SRR957843(4;4),
II	1831618	+	TRANNYTRY	TA(AC*A)ACAT	C	1831627	-7	proximal	1	1	yes	no	yes	0,0,(0,1,0)	0,0,(0,1,0)	0,0,(0,1,0)	0,0,(0,1,0)	SRR957843(1;1),
II	1839835	+	TRANNYTRY	TA(AC*T)TTTG	C	1839846	-9	proximal	5	2	yes	yes	yes	0,0,(0,5,0)	0,0,(0,2,0)	0,0,(0,5,0)	0,0,(0,2,0)	SRR957843(2;1),SRR957844(3;1),
II	1906370	+	TRANNYTRY	TA(A*CT)TTTT	A	1906383	-9	expected	86	46	yes	yes	yes	6,10,(69,1,0)	4,8,(33,1,0)	0,1,(66,1,0)	0,1,(30,1,0)	SRR957843(43;26),SRR957844(43;20),
II	1911201	+	TRANNYTRY	TA(A*TA)TTAA	A	1911218	-13	expected	2	2	no	yes	yes	1,1,(0,0,0)	1,1,(0,0,0)	0,0,(0,0,0)	0,0,(0,0,0)	SRR957844(2;2),
II	1973582	+	TRANNYTRY	TA(AC*T)ATAA	C	1973604	-20	expected	1	1	yes	no	yes	0,0,(0,1,0)	0,0,(0,1,0)	0,0,(0,1,0)	0,0,(0,1,0)	SRR957844(1;1),
II	2016555	+	TRANNYTRY	TA(A*CG)TTGA	A	2016569	-10	expected	64	43	yes	yes	yes	5,6,(53,0,0)	4,6,(33,0,0)	1,2,(52,0,0)	1,2,(32,0,0)	SRR957843(28;20),SRR957844(36;23),
II	2100511	+	TRANNYTRY	TA(A*CC)TTGC	A	2100519	-4	proximal	17	15	yes	yes	yes	1,1,(15,0,0)	1,1,(13,0,0)	0,1,(14,0,0)	0,1,(12,0,0)	SRR957843(8;7),SRR957844(9;8),
II	2149520	+	TRANNYTRY	TA(A*CT)CAAT	A	2149531	-7	proximal	60	36	yes	yes	yes	12,1,(47,0,0)	10,1,(25,0,0)	1,1,(44,0,0)	1,1,(23,0,0)	SRR957844(33;19),SRR957843(27;17),
II	2211075	+	TRANNYTRY	TA(AC*A)TTTT	C	2211085	-8	proximal	1	1	yes	no	yes	0,0,(0,1,0)	0,0,(0,1,0)	0,0,(0,1,0)	0,0,(0,1,0)	SRR957843(1;1),
II	2274597	+	TRANNYTRY	TA(A*CT)ATCC	A	2274609	-8	proximal	3	3	no	yes	yes	3,0,(0,0,0)	3,0,(0,0,0)	0,0,(0,0,0)	0,0,(0,0,0)	SRR957843(1;1),SRR957844(2;2),
II	2295315	+	TRANNYTRY	TT(A*TA)CTGT	A	2295323	-4	proximal	2	2	yes	yes	yes	0,0,(2,0,0)	0,0,(2,0,0)	0,0,(1,0,0)	0,0,(1,0,0)	SRR957843(1;1),SRR957844(1;1),
II	2340976	+	TRANNYTRY	TA(A*CA)TTGT	A	2340995	-15	expected	13	10	yes	yes	yes	1,1,(11,0,0)	1,1,(8,0,0)	0,0,(11,0,0)	0,0,(8,0,0)	SRR957844(3;3),SRR957843(10;7),
II	2403126	+	TRANNYTRY	TA(A*CA)CTAT	A	2403137	-7	proximal	11	8	yes	yes	yes	2,1,(8,0,0)	2,1,(5,0,0)	2,0,(8,0,0)	2,0,(5,0,0)	SRR957844(3;3),SRR957843(8;5),
II	2452307	+	TRANNYTRY	TA(AT*T)ATTT	T	2452318	-9	proximal	1	1	no	no	yes	0,0,(0,1,0)	0,0,(0,1,0)	0,0,(0,0,0)	0,0,(0,0,0)	SRR957843(1;1),
II	2466642	+	TRANNYTRY	TA(A*TT)TTAT	A	2466650	-4	proximal	29	21	yes	yes	yes	1,7,(21,0,0)	1,6,(14,0,0)	0,1,(21,0,0)	0,1,(14,0,0)	SRR957844(15;10),SRR957843(14;11),
II	2492207	+	TRANNYTRY	TA(AC*A)TTTT	C	2492219	-10	expected	4	4	yes	yes	yes	0,0,(0,4,0)	0,0,(0,4,0)	0,0,(0,4,0)	0,0,(0,4,0)	SRR957844(1;1),SRR957843(3;3),
II	2507106	+	TRANNYTRY	TA(A*CT)TGAT	A	2507116	-6	proximal	22	17	yes	yes	yes	2,2,(18,0,0)	2,2,(13,0,0)	1,0,(18,0,0)	1,0,(13,0,0)	SRR957844(9;7),SRR957843(13;10),
II	2619150	+	TRANNYTRY	TA(A*CT)CTAT	A	2619275	-121	distal	1	1	no	no	yes	0,0,(1,0,0)	0,0,(1,0,0)	0,0,(0,0,0)	0,0,(0,0,0)	SRR957843(1;1),
II	2691188	+	TRANNYTRY	TA(AT*T)GTTT	T	2691196	-6	proximal	16	15	no	yes	yes	0,0,(0,16,0)	0,0,(0,15,0)	0,0,(0,0,0)	0,0,(0,0,0)	SRR957844(5;5),SRR957843(11;10),
II	2756161	+	TRANNYTRY	TC(AC*A)CTTT	C	2756171	-8	proximal	1	1	yes	no	yes	0,0,(0,1,0)	0,0,(0,1,0)	0,0,(0,1,0)	0,0,(0,1,0)	SRR957843(1;1),
II	2840997	+	TRANNYTRY	TA(A*TA)TAGC	A	2841005	-4	proximal	1	1	yes	no	yes	0,0,(1,0,0)	0,0,(1,0,0)	0,0,(1,0,0)	0,0,(1,0,0)	SRR957843(1;1),
II	2921856	+	TRANNYTRY	TA(AC*C)TTTT	C	2921863	-7	proximal	1	1	no	no	yes	0,1,(0,0,0)	0,1,(0,0,0)	0,0,(0,0,0)	0,0,(0,0,0)	SRR957844(1;1),
II	3004774	+	TRANNYTRY	TA(A*CA)TTTT	A	3004782	-4	proximal	117	69	yes	yes	yes	31,15,(71,0,0)	19,12,(38,0,0)	6,7,(61,0,0)	5,6,(30,0,0)	SRR957844(34;23),SRR957843(83;46),
II	3058064	+	TRANNYTRY	TA(A*AG)CTGT	A	3058075	-7	proximal	2	2	yes	yes	yes	0,0,(2,0,0)	0,0,(2,0,0)	0,0,(2,0,0)	0,0,(2,0,0)	SRR957844(1;1),SRR957843(1;1),
II	3083730	+	TRANNYTRY	TA(A*CA)TTTG	A	3083741	-7	proximal	1	1	yes	no	yes	0,0,(1,0,0)	0,0,(1,0,0)	0,0,(1,0,0)	0,0,(1,0,0)	SRR957843(1;1),
II	3118208	+	TRANNYTRY	AA(C*GA)TTAT	C	3118218	-6	proximal	28	22	yes	yes	yes	4,24,(0,0,0)	4,18,(0,0,0)	1,24,(0,0,0)	1,18,(0,0,0)	SRR957844(12;10),SRR957843(16;12),
II	3327534	+	TRANNYTRY	TA(TA*G)TTAT	A	3327596	-62	distal	1	1	yes	no	yes	0,1,(0,0,0)	0,1,(0,0,0)	0,1,(0,0,0)	0,1,(0,0,0)	SRR957844(1;1),
II	3327584	+	TRANNYTRY	GA(C*TA)TTAT	C	3327596	-8	proximal	1	1	yes	no	yes	0,0,(1,0,0)	0,0,(1,0,0)	0,0,(1,0,0)	0,0,(1,0,0)	SRR957844(1;1),
II	3344808	+	TRANNYTRY	TA(A*CC)TAAT	A	3344832	-20	expected	1	1	yes	no	yes	0,0,(1,0,0)	0,0,(1,0,0)	0,0,(1,0,0)	0,0,(1,0,0)	SRR957844(1;1),
II	3348130	+	TRANNYTRY	TA(A*CA)TTCT	A	3348143	-9	expected	1	1	yes	no	yes	1,0,(0,0,0)	1,0,(0,0,0)	1,0,(0,0,0)	1,0,(0,0,0)	SRR957844(1;1),
II	3404113	+	TRANNYTRY	TA(A*CT)TTTT	A	3404123	-6	proximal	28	23	yes	yes	yes	1,1,(26,0,0)	1,1,(21,0,0)	0,1,(23,0,0)	0,1,(18,0,0)	SRR957843(13;11),SRR957844(15;12),
II	3430572	+	TRANNYTRY	TA(A*CG)TCGT	A	3430580	-4	proximal	50	33	yes	yes	yes	4,7,(39,0,0)	4,6,(23,0,0)	1,0,(38,0,0)	1,0,(22,0,0)	SRR957844(30;18),SRR957843(20;15),
II	3524863	+	TRANNYTRY	TA(A*CT)AAAT	A	3524874	-7	proximal	3	3	yes	yes	yes	0,0,(3,0,0)	0,0,(3,0,0)	0,0,(3,0,0)	0,0,(3,0,0)	SRR957843(1;1),SRR957844(2;2),
II	3541491	+	TRANNYTRY	TG(AC*A)TTTT	C	3541502	-9	proximal	150	97	yes	yes	yes	14,9,(110,17,0)	9,8,(66,14,0)	0,6,(107,17,0)	0,6,(63,14,0)	SRR957842(3;3),SRR957843(75;50),SRR957844(71;43),SRR957841(1;1),
II	3616865	+	TRANNYTRY	TA(A*CC)TCAT	A	3616876	-7	proximal	9	8	yes	yes	yes	1,2,(6,0,0)	1,1,(6,0,0)	0,2,(6,0,0)	0,1,(6,0,0)	SRR957844(6;5),SRR957843(3;3),
II	3630163	+	TRANNYTRY	AA(T*CT)TTAT	T	3630171	-4	proximal	272	64	yes	yes	yes	35,237,(0,0,0)	20,44,(0,0,0)	8,228,(0,0,0)	7,37,(0,0,0)	SRR957843(151;33),SRR957844(121;31),
II	3652672	+	TRANNYTRY	TA(AC*G)TGTT	C	3652679	-5	proximal	3	2	yes	yes	yes	0,0,(0,3,0)	0,0,(0,2,0)	0,0,(0,1,0)	0,0,(0,1,0)	SRR957843(1;1),SRR957844(2;1),
II	3686441	+	TRANNYTRY	TA(A*TA)CTAA	A	3686456	-11	expected	12	11	yes	yes	yes	2,0,(10,0,0)	2,0,(9,0,0)	0,0,(10,0,0)	0,0,(9,0,0)	SRR957843(8;7),SRR957844(4;4),
II	3686448	+	TRANNYTRY	TA(AT*T)TTAT	T	3686456	-6	proximal	20	14	yes	yes	yes	0,1,(18,1,0)	0,1,(12,1,0)	0,0,(18,0,0)	0,0,(12,0,0)	SRR957844(7;5),SRR957843(13;9),
II	3753182	+	TRANNYTRY	TA(A*CA)CTAT	A	3753193	-7	proximal	1	1	yes	no	yes	0,0,(1,0,0)	0,0,(1,0,0)	0,0,(1,0,0)	0,0,(1,0,0)	SRR957843(1;1),
II	3818518	+	TRANNYTRY	TA(AT*A)CAAT	T	3818529	-9	proximal	5	4	no	yes	yes	0,0,(0,5,0)	0,0,(0,4,0)	0,0,(0,0,0)	0,0,(0,0,0)	SRR957844(3;2),SRR957843(2;2),
II	3935416	+	TRANNYTRY	TA(AC*A)AAAT	C	3935424	-6	proximal	1	1	yes	no	yes	0,0,(0,1,0)	0,0,(0,1,0)	0,0,(0,1,0)	0,0,(0,1,0)	SRR957844(1;1),
II	3993818	+	TRANNYTRY	TA(A*CG)CGGT	A	3993835	-13	expected	5	5	yes	yes	yes	0,0,(5,0,0)	0,0,(5,0,0)	0,0,(5,0,0)	0,0,(5,0,0)	SRR957843(3;3),SRR957844(2;2),
II	3995066	+	TRANNYTRY	TA(A*CA)TAAC	A	3995074	-4	proximal	36	20	yes	yes	yes	1,2,(33,0,0)	1,2,(17,0,0)	0,0,(28,0,0)	0,0,(14,0,0)	SRR957843(21;10),SRR957844(15;10),
II	3997808	+	TRANNYTRY	TA(A*CA)GTTT	A	3997818	-6	proximal	36	28	yes	yes	yes	2,3,(31,0,0)	2,3,(23,0,0)	2,1,(23,0,0)	2,1,(18,0,0)	SRR957843(24;18),SRR957844(12;10),
II	4190258	+	TRANNYTRY	TG(AC*T)TCAT	C	4190266	-6	proximal	1	1	yes	no	yes	0,0,(0,1,0)	0,0,(0,1,0)	0,0,(0,1,0)	0,0,(0,1,0)	SRR957844(1;1),
II	4244351	+	TRANNYTRY	TA(AC*T)TTTT	C	4244359	-6	proximal	2	2	yes	yes	yes	0,0,(0,2,0)	0,0,(0,2,0)	0,0,(0,2,0)	0,0,(0,2,0)	SRR957844(1;1),SRR957843(1;1),
II	4269126	+	TRANNYTRY	TA(A*CA)TTTC	A	4269135	-5	proximal	17	15	yes	yes	yes	2,1,(14,0,0)	2,1,(12,0,0)	1,1,(14,0,0)	1,1,(12,0,0)	SRR957843(9;7),SRR957844(8;8),
II	4275902	+	TRANNYTRY	TA(A*CA)ATAC	A	4275914	-8	proximal	98	42	yes	yes	yes	3,1,(94,0,0)	3,1,(38,0,0)	2,1,(91,0,0)	2,1,(36,0,0)	SRR957843(58;25),SRR957844(40;17),
II	4360964	+	TRANNYTRY	TA(A*TA)TTAT	A	4360974	-6	proximal	132	48	yes	yes	yes	9,1,(122,0,0)	6,1,(41,0,0)	0,0,(121,0,0)	0,0,(40,0,0)	SRR957844(57;23),SRR957843(75;25),
II	4368622	+	TRANNYTRY	TA(AC*C)GTTT	C	4368634	-10	expected	1	1	yes	no	yes	0,0,(0,1,0)	0,0,(0,1,0)	0,0,(0,1,0)	0,0,(0,1,0)	SRR957843(1;1),
III	89146	-	TRANNYTRY	TA(AC*T)TATT	C	89136	-8	proximal	2	2	yes	yes	yes	0,0,(0,2,0)	0,0,(0,2,0)	0,0,(0,1,0)	0,0,(0,1,0)	SRR957844(1;1),SRR957843(1;1),
III	89331	-	TRANNYTRY	TG(AA*A)TAAC	A	89136	-193	distal	7	7	yes	yes	yes	0,1,(2,4,0)	0,1,(2,4,0)	0,1,(0,3,0)	0,1,(0,3,0)	SRR957843(4;4),SRR957844(3;3),
III	150172	-	TRANNYTRY	TA(A*TG)TTTT	A	150163	-5	proximal	28	25	yes	yes	yes	0,3,(25,0,0)	0,3,(22,0,0)	0,0,(24,0,0)	0,0,(21,0,0)	SRR957844(8;8),SRR957843(20;17),
III	241444	-	TRANNYTRY	TA(AC*A)CAAT	C	241436	-8	proximal	1	1	no	no	yes	0,1,(0,0,0)	0,1,(0,0,0)	0,0,(0,0,0)	0,0,(0,0,0)	SRR957844(1;1),
III	295975	-	TRANNYTRY	TA(A*CC)TTAT	A	295967	-4	proximal	1	1	yes	no	yes	0,0,(1,0,0)	0,0,(1,0,0)	0,0,(1,0,0)	0,0,(1,0,0)	SRR957844(1;1),
III	296283	-	TRANNYTRY	TA(A*CT)CTCT	A	296266	-13	expected	147	71	yes	yes	yes	5,7,(135,0,0)	4,7,(60,0,0)	3,3,(124,0,0)	2,3,(51,0,0)	SRR957843(71;35),SRR957844(76;36),
III	339364	-	TRANNYTRY	CC(A*CC)TTAT	A	339354	-6	proximal	3	3	yes	yes	yes	3,0,(0,0,0)	3,0,(0,0,0)	3,0,(0,0,0)	3,0,(0,0,0)	SRR957844(1;1),SRR957843(2;2),
III	389225	-	TRANNYTRY	TA(AC*T)TTTC	C	389218	-5	proximal	9	7	yes	yes	yes	0,0,(0,9,0)	0,0,(0,7,0)	0,0,(0,8,0)	0,0,(0,6,0)	SRR957843(5;4),SRR957844(4;3),
III	469157	-	TRANNYTRY	TG(A*CA)TTTT	A	469135	-18	expected	27	16	yes	yes	yes	14,0,(13,0,0)	8,0,(8,0,0)	0,0,(13,0,0)	0,0,(8,0,0)	SRR957841(1;1),SRR957844(10;7),SRR957843(16;8),
III	540382	-	TRANNYTRY	TA(TC*G)TTTT	C	540376	-6	proximal	3	3	yes	yes	yes	0,3,(0,0,0)	0,3,(0,0,0)	0,3,(0,0,0)	0,3,(0,0,0)	SRR957843(1;1),SRR957844(2;2),
III	613575	-	TRANNYTRY	TG(A*CT)TTAT	A	613564	-7	proximal	4	4	yes	yes	yes	2,0,(1,1,0)	2,0,(1,1,0)	0,0,(1,1,0)	0,0,(1,1,0)	SRR957844(4;4),
III	676761	-	TRANNYTRY	TA(A*CA)TCGT	A	676750	-7	proximal	3	1	yes	no	yes	0,0,(3,0,0)	0,0,(1,0,0)	0,0,(3,0,0)	0,0,(1,0,0)	SRR957844(3;1),
III	697764	-	TRANNYTRY	TA(AC*A)CTTT	C	697752	-10	expected	2	2	yes	yes	yes	0,0,(0,2,0)	0,0,(0,2,0)	0,0,(0,2,0)	0,0,(0,2,0)	SRR957844(1;1),SRR957843(1;1),
III	701406	-	TRANNYTRY	TA(A*CA)GTAT	A	701391	-11	expected	53	38	yes	yes	yes	2,2,(49,0,0)	2,2,(34,0,0)	1,0,(49,0,0)	1,0,(34,0,0)	SRR957843(32;24),SRR957844(21;14),
III	705734	-	TRANNYTRY	TA(A*CA)TGGA	A	705722	-8	proximal	3	3	yes	yes	yes	0,0,(3,0,0)	0,0,(3,0,0)	0,0,(3,0,0)	0,0,(3,0,0)	SRR957844(2;2),SRR957843(1;1),
III	706936	-	TRANNYTRY	TA(A*CG)ATAT	A	706917	-15	expected	1	1	yes	no	yes	0,0,(1,0,0)	0,0,(1,0,0)	0,0,(1,0,0)	0,0,(1,0,0)	SRR957844(1;1),
III	740894	-	TRANNYTRY	TA(A*CG)AAAT	A	740881	-9	expected	27	20	yes	yes	yes	0,0,(27,0,0)	0,0,(20,0,0)	0,0,(27,0,0)	0,0,(20,0,0)	SRR957844(14;12),SRR957843(13;8),
III	816257	-	TRANNYTRY	TA(A*CA)TTAG	A	816247	-6	proximal	2	2	yes	yes	yes	1,0,(1,0,0)	1,0,(1,0,0)	0,0,(1,0,0)	0,0,(1,0,0)	SRR957843(1;1),SRR957844(1;1),
III	852451	-	TRANNYTRY	TA(A*TC)GTGT	A	852440	-7	proximal	3	3	yes	yes	yes	0,1,(2,0,0)	0,1,(2,0,0)	0,1,(1,0,0)	0,1,(1,0,0)	SRR957843(2;2),SRR957842(1;1),
III	887565	-	TRANNYTRY	TA(A*CA)TATT	A	887555	-6	proximal	119	75	yes	yes	yes	1,9,(109,0,0)	1,8,(66,0,0)	0,2,(93,0,0)	0,2,(51,0,0)	SRR957844(68;40),SRR957843(51;35),
III	1032278	-	TRANNYTRY	TT(AA*T)TTAT	A	1032269	-7	proximal	1	1	no	no	yes	0,0,(0,1,0)	0,0,(0,1,0)	0,0,(0,0,0)	0,0,(0,0,0)	SRR957843(1;1),
III	1037086	-	TRANNYTRY	TA(A*CA)TTTT	A	1037070	-12	expected	12	9	yes	yes	yes	1,2,(9,0,0)	1,2,(6,0,0)	1,1,(9,0,0)	1,1,(6,0,0)	SRR957843(10;7),SRR957844(2;2),
III	1051335	-	TRANNYTRY	TA(A*CG)GTAT	A	1051324	-7	proximal	1	1	yes	no	yes	0,0,(1,0,0)	0,0,(1,0,0)	0,0,(1,0,0)	0,0,(1,0,0)	SRR957843(1;1),
III	1059271	-	TRANNYTRY	TA(A*CG)TAAC	A	1059257	-10	expected	19	19	yes	yes	yes	4,3,(12,0,0)	4,3,(12,0,0)	1,0,(11,0,0)	1,0,(11,0,0)	SRR957844(7;7),SRR957843(12;12),
III	1266021	-	TRANNYTRY	TA(AC*C)TCTT	C	1266005	-14	expected	2	2	yes	no	yes	0,0,(0,2,0)	0,0,(0,2,0)	0,0,(0,2,0)	0,0,(0,2,0)	SRR957844(2;2),
III	1266564	-	TRANNYTRY	TG(A*TC)TTAA	A	1266543	-17	expected	1	1	yes	no	yes	0,0,(1,0,0)	0,0,(1,0,0)	0,0,(1,0,0)	0,0,(1,0,0)	SRR957843(1;1),
III	1441690	-	TRANNYTRY	TA(A*CA)CAAT	A	1441670	-16	expected	14	11	yes	yes	yes	6,1,(7,0,0)	4,1,(6,0,0)	0,0,(7,0,0)	0,0,(6,0,0)	SRR957843(3;3),SRR957844(11;8),
III	1465070	-	TRANNYTRY	TA(AC*G)TTTT	C	1465061	-7	proximal	8	6	yes	yes	yes	0,0,(0,8,0)	0,0,(0,6,0)	0,0,(0,8,0)	0,0,(0,6,0)	SRR957844(2;2),SRR957843(6;4),
III	1484588	-	TRANNYTRY	TA(A*TT)TTAT	A	1484578	-6	proximal	1	1	no	no	yes	1,0,(0,0,0)	1,0,(0,0,0)	0,0,(0,0,0)	0,0,(0,0,0)	SRR957844(1;1),
III	1512713	-	TRANNYTRY	TA(A*CT)CGAT	A	1512702	-7	proximal	136	66	yes	yes	yes	8,6,(117,5,0)	6,6,(49,5,0)	1,3,(114,3,0)	1,3,(46,3,0)	SRR957843(78;36),SRR957842(1;1),SRR957844(57;29),
III	1513065	-	TRANNYTRY	TT(A*CA)ATGT	A	1512702	-359	distal	2	2	yes	no	yes	0,0,(2,0,0)	0,0,(2,0,0)	0,0,(2,0,0)	0,0,(2,0,0)	SRR957843(2;2),
III	1607250	-	TRANNYTRY	TA(AC*C)GTTT	C	1607233	-15	expected	10	6	yes	yes	yes	0,0,(0,10,0)	0,0,(0,6,0)	0,0,(0,9,0)	0,0,(0,5,0)	SRR957844(6;3),SRR957843(4;3),
III	1614711	-	TRANNYTRY	TG(CT*C)TTGT	T	1614577	-134	distal	1	1	yes	no	yes	0,1,(0,0,0)	0,1,(0,0,0)	0,1,(0,0,0)	0,1,(0,0,0)	SRR957844(1;1),
III	1618724	-	TRANNYTRY	TA(A*CT)TTAC	A	1618713	-7	proximal	5	5	yes	yes	yes	1,0,(4,0,0)	1,0,(4,0,0)	1,0,(4,0,0)	1,0,(4,0,0)	SRR957844(3;3),SRR957843(2;2),
III	1747825	-	TRANNYTRY	TA(A*CA)TGAT	A	1747817	-4	proximal	58	38	yes	yes	yes	6,5,(47,0,0)	6,5,(27,0,0)	1,1,(46,0,0)	1,1,(26,0,0)	SRR957844(26;16),SRR957842(1;1),SRR957843(31;21),
III	1830983	-	TRANNYTRY	TA(A*CA)ATAT	A	1830972	-7	proximal	1	1	yes	no	yes	0,0,(1,0,0)	0,0,(1,0,0)	0,0,(1,0,0)	0,0,(1,0,0)	SRR957843(1;1),
III	1845986	-	TRANNYTRY	TA(GT*A)TTAA	T	1845973	-13	expected	1	1	no	no	yes	0,1,(0,0,0)	0,1,(0,0,0)	0,0,(0,0,0)	0,0,(0,0,0)	SRR957843(1;1),
III	1896938	-	TRANNYTRY	TA(A*CT)TTGC	A	1896928	-6	proximal	24	16	yes	yes	yes	2,0,(22,0,0)	1,0,(15,0,0)	0,0,(22,0,0)	0,0,(15,0,0)	SRR957843(16;11),SRR957844(8;5),
III	1978113	-	TRANNYTRY	TA(A*CA)TGAT	A	1978101	-8	proximal	3	3	yes	no	yes	0,0,(3,0,0)	0,0,(3,0,0)	0,0,(3,0,0)	0,0,(3,0,0)	SRR957843(3;3),
III	1980792	-	TRANNYTRY	TA(A*CT)TTAT	A	1980781	-7	proximal	16	13	yes	yes	yes	3,0,(13,0,0)	3,0,(10,0,0)	0,0,(13,0,0)	0,0,(10,0,0)	SRR957843(11;10),SRR957844(5;3),
III	1980893	-	TRANNYTRY	TA(AAT*)TTTC	T	1980781	-112	distal	1	1	yes	no	yes	0,0,(0,0,1)	0,0,(0,0,1)	0,0,(0,0,1)	0,0,(0,0,1)	SRR957843(1;1),
III	1990113	-	TRANNYTRY	TA(AC*T)TTTT	C	1990100	-13	expected	4	3	no	yes	yes	0,4,(0,0,0)	0,3,(0,0,0)	0,0,(0,0,0)	0,0,(0,0,0)	SRR957844(2;1),SRR957843(2;2),
III	2046709	-	TRANNYTRY	TA(AT*G)ATAT	T	2046700	-7	proximal	5	4	no	no	yes	0,0,(0,5,0)	0,0,(0,4,0)	0,0,(0,0,0)	0,0,(0,0,0)	SRR957843(5;4),
III	2144368	-	TRANNYTRY	TA(A*TA)ATTT	A	2144357	-7	proximal	47	32	yes	yes	yes	3,1,(43,0,0)	3,1,(28,0,0)	0,0,(41,0,0)	0,0,(26,0,0)	SRR957844(16;13),SRR957843(31;19),
III	2144635	-	TRANNYTRY	TC(A*TT)TTAT	A	2144357	-274	distal	2	2	yes	no	yes	0,0,(2,0,0)	0,0,(2,0,0)	0,0,(2,0,0)	0,0,(2,0,0)	SRR957844(2;2),
III	2154859	-	TRANNYTRY	AA(A*AT)TTGT	A	2154847	-8	proximal	1	1	yes	no	yes	1,0,(0,0,0)	1,0,(0,0,0)	1,0,(0,0,0)	1,0,(0,0,0)	SRR957843(1;1),
III	2208306	-	TRANNYTRY	TA(AC*T)TTTT	C	2208291	-13	expected	1	1	yes	no	yes	0,0,(0,1,0)	0,0,(0,1,0)	0,0,(0,1,0)	0,0,(0,1,0)	SRR957843(1;1),
III	2267282	-	TRANNYTRY	TA(CT*A)ATGT	T	2267270	-12	expected	3	3	yes	yes	yes	0,3,(0,0,0)	0,3,(0,0,0)	0,2,(0,0,0)	0,2,(0,0,0)	SRR957844(2;2),SRR957843(1;1),
III	2269506	-	TRANNYTRY	TA(A*CT)CTTT	A	2269488	-14	expected	11	8	yes	yes	yes	0,1,(10,0,0)	0,1,(7,0,0)	0,1,(10,0,0)	0,1,(7,0,0)	SRR957844(3;2),SRR957843(8;6),
III	2328375	-	TRANNYTRY	TA(A*CA)TCAT	A	2328363	-8	proximal	11	10	yes	yes	yes	0,2,(9,0,0)	0,2,(8,0,0)	0,0,(8,0,0)	0,0,(7,0,0)	SRR957844(3;3),SRR957843(8;7),
III	2367346	-	TRANNYTRY	TA(A*TA)TTGA	A	2367155	-187	distal	1	1	yes	no	yes	0,0,(1,0,0)	0,0,(1,0,0)	0,0,(1,0,0)	0,0,(1,0,0)	SRR957844(1;1),
III	2397748	-	TRANNYTRY	TA(A*CA)TTTT	A	2397737	-7	proximal	34	24	yes	yes	yes	2,3,(29,0,0)	2,2,(20,0,0)	2,0,(29,0,0)	2,0,(20,0,0)	SRR957844(20;13),SRR957843(13;10),SRR957841(1;1),
III	2408080	-	TRANNYTRY	TA(AC*A)AAAC	C	2408069	-9	proximal	8	8	yes	yes	yes	0,0,(0,8,0)	0,0,(0,8,0)	0,0,(0,6,0)	0,0,(0,6,0)	SRR957844(4;4),SRR957843(4;4),
III	93604	+	TRANNYTRY	TA(A*CG)GTAC	A	93617	-9	expected	12	11	yes	yes	yes	4,0,(8,0,0)	4,0,(7,0,0)	0,0,(8,0,0)	0,0,(7,0,0)	SRR957844(4;3),SRR957843(8;8),
III	144826	+	TRANNYTRY	TA(A*CA)TACT	A	144837	-7	proximal	38	29	yes	yes	yes	1,4,(33,0,0)	1,4,(24,0,0)	0,0,(30,0,0)	0,0,(22,0,0)	SRR957844(13;9),SRR957843(25;20),
III	191514	+	TRANNYTRY	TA(A*TA)TTTT	A	191525	-7	proximal	1	1	no	no	yes	1,0,(0,0,0)	1,0,(0,0,0)	0,0,(0,0,0)	0,0,(0,0,0)	SRR957843(1;1),
III	194670	+	TRANNYTRY	TA(A*CA)TTAT	A	194693	-19	expected	11	9	yes	yes	yes	1,0,(10,0,0)	1,0,(8,0,0)	0,0,(10,0,0)	0,0,(8,0,0)	SRR957843(8;6),SRR957844(3;3),
III	216172	+	TRANNYTRY	TA(A*CC)TTAT	A	216186	-10	expected	8	6	yes	yes	yes	4,0,(4,0,0)	4,0,(2,0,0)	3,0,(4,0,0)	3,0,(2,0,0)	SRR957844(5;3),SRR957843(3;3),
III	223673	+	TRANNYTRY	TA(A*CA)CTTC	A	223686	-9	expected	5	5	yes	yes	yes	0,0,(5,0,0)	0,0,(5,0,0)	0,0,(3,0,0)	0,0,(3,0,0)	SRR957843(4;4),SRR957844(1;1),
III	320944	+	TRANNYTRY	TA(A*TA)TTTT	A	320963	-15	expected	3	3	yes	yes	yes	0,0,(3,0,0)	0,0,(3,0,0)	0,0,(2,0,0)	0,0,(2,0,0)	SRR957843(2;2),SRR957844(1;1),
III	354835	+	TRANNYTRY	TA(A*TG)CTAA	A	354855	-16	expected	2	2	yes	yes	yes	0,1,(1,0,0)	0,1,(1,0,0)	0,1,(1,0,0)	0,1,(1,0,0)	SRR957844(1;1),SRR957843(1;1),
III	355255	+	TRANNYTRY	TA(A*CC)TTTT	A	355268	-9	expected	7	6	yes	yes	yes	0,0,(7,0,0)	0,0,(6,0,0)	0,0,(7,0,0)	0,0,(6,0,0)	SRR957844(3;2),SRR957843(4;4),
III	406292	+	TRANNYTRY	TA(A*CC)TATT	A	406302	-6	proximal	31	24	yes	yes	yes	2,1,(28,0,0)	2,1,(21,0,0)	0,1,(27,0,0)	0,1,(20,0,0)	SRR957844(13;10),SRR957843(18;14),
III	465246	+	TRANNYTRY	TA(A*CC)TTTT	A	465258	-8	proximal	45	25	yes	yes	yes	1,3,(41,0,0)	1,3,(21,0,0)	0,1,(41,0,0)	0,1,(21,0,0)	SRR957844(25;14),SRR957842(1;1),SRR957843(19;10),
III	508761	+	TRANNYTRY	TA(A*CT)CTTT	A	508776	-11	expected	9	8	yes	yes	yes	0,0,(9,0,0)	0,0,(8,0,0)	0,0,(9,0,0)	0,0,(8,0,0)	SRR957844(2;2),SRR957843(7;6),
III	528179	+	TRANNYTRY	TA(AC*T)ATTT	C	528189	-8	proximal	2	2	yes	no	yes	0,0,(0,2,0)	0,0,(0,2,0)	0,0,(0,2,0)	0,0,(0,2,0)	SRR957844(2;2),
III	541537	+	TRANNYTRY	TT(A*AT)CTGT	A	541568	-27	expected	1	1	no	no	yes	1,0,(0,0,0)	1,0,(0,0,0)	0,0,(0,0,0)	0,0,(0,0,0)	SRR957843(1;1),
III	541556	+	TRANNYTRY	TA(A*CG)CTAG	A	541568	-8	proximal	16	16	yes	yes	yes	0,0,(16,0,0)	0,0,(16,0,0)	0,0,(14,0,0)	0,0,(14,0,0)	SRR957843(10;10),SRR957844(6;6),
III	584471	+	TRANNYTRY	TA(A*CT)CGAT	A	584485	-10	expected	1	1	yes	no	yes	0,0,(1,0,0)	0,0,(1,0,0)	0,0,(1,0,0)	0,0,(1,0,0)	SRR957844(1;1),
III	660284	+	TRANNYTRY	AC(AC*A)TTAT	C	660297	-13	expected	1	1	yes	no	yes	0,1,(0,0,0)	0,1,(0,0,0)	0,1,(0,0,0)	0,1,(0,0,0)	SRR957844(1;1),
III	665201	+	TRANNYTRY	TA(A*CA)CTAT	A	665213	-8	proximal	26	24	yes	yes	yes	7,5,(12,2,0)	7,5,(10,2,0)	4,0,(9,1,0)	4,0,(8,1,0)	SRR957843(14;13),SRR957844(12;11),
III	748979	+	TRANNYTRY	TA(A*CG)TTTT	A	748989	-6	proximal	14	12	yes	yes	yes	13,1,(0,0,0)	11,1,(0,0,0)	2,1,(0,0,0)	1,1,(0,0,0)	SRR957844(6;5),SRR957843(8;7),
III	749134	+	TRANNYTRY	AG(AT*T)TTAT	T	749159	-23	expected	19	14	yes	yes	yes	0,0,(8,11,0)	0,0,(6,8,0)	0,0,(0,3,0)	0,0,(0,3,0)	SRR957843(12;9),SRR957844(7;5),
III	749470	+	TRANNYTRY	TA(AC*G)TTTC	C	749478	-6	proximal	5	4	yes	yes	yes	0,0,(0,5,0)	0,0,(0,4,0)	0,0,(0,5,0)	0,0,(0,4,0)	SRR957844(1;1),SRR957843(4;3),
III	783573	+	TRANNYTRY	TT(AA*T)TTCT	A	783593	-18	expected	2	2	yes	yes	yes	0,0,(1,1,0)	0,0,(1,1,0)	0,0,(1,1,0)	0,0,(1,1,0)	SRR957843(2;2),
III	783580	+	TRANNYTRY	TA(A*CT)CTTT	A	783593	-9	expected	89	57	yes	yes	yes	2,6,(78,3,0)	2,6,(47,2,0)	1,2,(75,3,0)	1,2,(44,2,0)	SRR957843(54;33),SRR957844(35;24),
III	825215	+	TRANNYTRY	TA(A*AA)CCGC	A	825242	-23	expected	2	1	no	no	yes	0,0,(2,0,0)	0,0,(1,0,0)	0,0,(0,0,0)	0,0,(0,0,0)	SRR957844(2;1),
III	825232	+	TRANNYTRY	TA(A*CT)TTAT	A	825242	-6	proximal	4	3	yes	yes	yes	0,1,(3,0,0)	0,1,(2,0,0)	0,0,(3,0,0)	0,0,(2,0,0)	SRR957843(2;1),SRR957844(2;2),
III	831434	+	TRANNYTRY	TA(A*AG)CTGA	A	831448	-10	expected	1	1	no	no	yes	0,0,(1,0,0)	0,0,(1,0,0)	0,0,(0,0,0)	0,0,(0,0,0)	SRR957844(1;1),
III	910833	+	TRANNYTRY	TA(A*CT)CAGT	A	910847	-10	expected	8	6	yes	yes	yes	2,0,(6,0,0)	2,0,(4,0,0)	1,0,(6,0,0)	1,0,(4,0,0)	SRR957843(2;2),SRR957844(6;4),
III	988832	+	TRANNYTRY	TA(CT*A)ATGT	T	988843	-11	expected	1	1	no	no	yes	0,1,(0,0,0)	0,1,(0,0,0)	0,0,(0,0,0)	0,0,(0,0,0)	SRR957843(1;1),
III	995520	+	TRANNYTRY	TA(A*CA)TGAT	A	995942	-418	distal	119	55	yes	yes	yes	4,5,(110,0,0)	3,4,(48,0,0)	4,1,(100,0,0)	3,1,(40,0,0)	SRR957843(78;36),SRR957844(41;19),
III	1026688	+	TRANNYTRY	TG(A*CT)TTGA	A	1026701	-9	expected	8	6	yes	yes	yes	5,0,(3,0,0)	3,0,(3,0,0)	0,0,(3,0,0)	0,0,(3,0,0)	SRR957843(5;5),SRR957844(3;1),
III	1166886	+	TRANNYTRY	TA(A*CA)CTTC	A	1167372	-482	distal	2	2	yes	yes	yes	0,0,(2,0,0)	0,0,(2,0,0)	0,0,(2,0,0)	0,0,(2,0,0)	SRR957843(1;1),SRR957844(1;1),
III	1208147	+	TRANNYTRY	TA(A*CA)TTAT	A	1208162	-11	expected	4	4	yes	yes	yes	1,0,(3,0,0)	1,0,(3,0,0)	0,0,(3,0,0)	0,0,(3,0,0)	SRR957843(4;4),
III	1324341	+	TRANNYTRY	TA(AC*C)ATTT	C	1324354	-11	expected	2	1	yes	no	yes	0,0,(0,2,0)	0,0,(0,1,0)	0,0,(0,2,0)	0,0,(0,1,0)	SRR957844(2;1),
III	1366965	+	TRANNYTRY	TA(AT*T)TGTT	T	1366980	-13	expected	4	3	yes	yes	yes	0,0,(0,4,0)	0,0,(0,3,0)	0,0,(0,4,0)	0,0,(0,3,0)	SRR957843(2;2),SRR957844(2;1),
III	1367275	+	TRANNYTRY	TA(AC*G)TTAA	C	1367284	-7	proximal	1	1	yes	no	yes	0,0,(0,1,0)	0,0,(0,1,0)	0,0,(0,1,0)	0,0,(0,1,0)	SRR957844(1;1),
III	1435525	+	TRANNYTRY	TC(A*CA)TAAT	A	1435595	-66	distal	2	1	yes	no	yes	0,0,(2,0,0)	0,0,(1,0,0)	0,0,(2,0,0)	0,0,(1,0,0)	SRR957843(2;1),
III	1476512	+	TRANNYTRY	TA(AC*C)TGTC	C	1476524	-10	expected	1	1	yes	no	yes	0,0,(0,1,0)	0,0,(0,1,0)	0,0,(0,1,0)	0,0,(0,1,0)	SRR957843(1;1),
III	1477709	+	TRANNYTRY	TG(AC*G)TTTT	C	1477719	-8	proximal	1	1	yes	no	yes	0,0,(0,1,0)	0,0,(0,1,0)	0,0,(0,1,0)	0,0,(0,1,0)	SRR957843(1;1),
III	1535655	+	TRANNYTRY	TA(AC*T)TCTT	C	1535665	-8	proximal	1	1	yes	no	yes	0,0,(0,1,0)	0,0,(0,1,0)	0,0,(0,1,0)	0,0,(0,1,0)	SRR957843(1;1),
III	1623826	+	TRANNYTRY	TA(A*CC)TTTA	A	1623838	-8	proximal	2	2	yes	no	yes	0,0,(2,0,0)	0,0,(2,0,0)	0,0,(2,0,0)	0,0,(2,0,0)	SRR957844(2;2),
III	1635800	+	TRANNYTRY	TA(AC*C)CTTT	C	1635811	-9	proximal	1	1	no	no	yes	0,0,(0,1,0)	0,0,(0,1,0)	0,0,(0,0,0)	0,0,(0,0,0)	SRR957843(1;1),
III	1733091	+	TRANNYTRY	TA(AC*G)TTTT	C	1733100	-7	proximal	6	6	yes	yes	yes	0,1,(4,1,0)	0,1,(4,1,0)	0,1,(4,1,0)	0,1,(4,1,0)	SRR957843(2;2),SRR957844(4;4),
III	1755625	+	TRANNYTRY	TA(A*CA)CTTT	A	1755635	-6	proximal	3	2	yes	yes	yes	0,0,(3,0,0)	0,0,(2,0,0)	0,0,(3,0,0)	0,0,(2,0,0)	SRR957843(1;1),SRR957844(2;1),
III	1761625	+	TRANNYTRY	TA(A*CA)GTAC	A	1761634	-5	proximal	57	39	yes	yes	yes	2,0,(55,0,0)	2,0,(37,0,0)	1,0,(51,0,0)	1,0,(34,0,0)	SRR957844(26;19),SRR957843(31;20),
III	1778356	+	TRANNYTRY	TA(AC*A)TAAT	C	1778366	-8	proximal	1	1	yes	no	yes	0,0,(0,1,0)	0,0,(0,1,0)	0,0,(0,1,0)	0,0,(0,1,0)	SRR957844(1;1),
III	1778818	+	TRANNYTRY	TA(A*CT)TCAT	A	1778831	-9	expected	42	33	yes	yes	yes	11,2,(29,0,0)	11,2,(20,0,0)	4,0,(27,0,0)	4,0,(18,0,0)	SRR957843(27;21),SRR957844(15;12),
III	1790312	+	TRANNYTRY	TA(AC*A)AAAT	C	1790319	-5	proximal	2	2	yes	no	yes	0,0,(0,2,0)	0,0,(0,2,0)	0,0,(0,2,0)	0,0,(0,2,0)	SRR957843(2;2),
III	1809690	+	TRANNYTRY	TA(A*TA)TTTT	A	1809983	-289	distal	1	1	no	no	yes	0,0,(1,0,0)	0,0,(1,0,0)	0,0,(0,0,0)	0,0,(0,0,0)	SRR957843(1;1),
III	1816382	+	TRANNYTRY	TA(AC*T)GTTT	C	1816396	-12	expected	2	2	no	yes	yes	0,0,(0,2,0)	0,0,(0,2,0)	0,0,(0,0,0)	0,0,(0,0,0)	SRR957844(1;1),SRR957843(1;1),
III	1823751	+	TRANNYTRY	TA(A*CA)TTGT	A	1823765	-10	expected	12	10	yes	yes	yes	1,0,(11,0,0)	1,0,(9,0,0)	0,0,(10,0,0)	0,0,(8,0,0)	SRR957844(7;5),SRR957843(5;5),
III	1832901	+	TRANNYTRY	TA(A*CT)TAAT	A	1832913	-8	proximal	10	10	yes	yes	yes	1,1,(8,0,0)	1,1,(8,0,0)	0,0,(7,0,0)	0,0,(7,0,0)	SRR957844(5;5),SRR957843(5;5),
III	1975108	+	TRANNYTRY	TA(A*CC)GAAT	A	1975120	-8	proximal	69	43	yes	yes	yes	6,6,(57,0,0)	5,6,(32,0,0)	3,4,(56,0,0)	3,4,(31,0,0)	SRR957844(29;16),SRR957843(40;27),
III	2012734	+	TRANNYTRY	TA(A*CA)TTGA	A	2012829	-91	distal	4	4	yes	yes	yes	1,2,(1,0,0)	1,2,(1,0,0)	1,0,(1,0,0)	1,0,(1,0,0)	SRR957844(2;2),SRR957843(2;2),
III	2025796	+	TRANNYTRY	TA(A*CT)TTGA	A	2025807	-7	proximal	1	1	yes	no	yes	0,0,(1,0,0)	0,0,(1,0,0)	0,0,(1,0,0)	0,0,(1,0,0)	SRR957843(1;1),
III	2126621	+	TRANNYTRY	CA(A*CT)ATGT	A	2126629	-4	proximal	1	1	yes	no	yes	1,0,(0,0,0)	1,0,(0,0,0)	1,0,(0,0,0)	1,0,(0,0,0)	SRR957843(1;1),
III	2153447	+	TRANNYTRY	TA(A*TA)TTGT	A	2153458	-7	proximal	4	4	no	yes	yes	2,2,(0,0,0)	2,2,(0,0,0)	0,0,(0,0,0)	0,0,(0,0,0)	SRR957843(1;1),SRR957844(3;3),
III	2201609	+	TRANNYTRY	TA(A*CA)AGAT	A	2201628	-15	expected	1	1	no	no	yes	1,0,(0,0,0)	1,0,(0,0,0)	0,0,(0,0,0)	0,0,(0,0,0)	SRR957844(1;1),
III	2231960	+	TRANNYTRY	TG(A*CC)TTAT	A	2231969	-5	proximal	2	2	yes	no	yes	0,0,(2,0,0)	0,0,(2,0,0)	0,0,(2,0,0)	0,0,(2,0,0)	SRR957843(2;2),
III	2285516	+	TRANNYTRY	TA(A*TG)ATAT	A	2285530	-10	expected	9	8	yes	yes	yes	1,0,(8,0,0)	1,0,(7,0,0)	0,0,(8,0,0)	0,0,(7,0,0)	SRR957844(4;4),SRR957843(5;4),
III	2406745	+	TRANNYTRY	TA(A*CT)CTAT	A	2406754	-5	proximal	26	24	yes	yes	yes	6,7,(12,1,0)	5,7,(11,1,0)	0,0,(12,1,0)	0,0,(11,1,0)	SRR957844(12;11),SRR957843(14;13),
AB325691	9376	-	none	ACTAA*TTATC	A	9365	-11	expected	55	26	yes	yes	yes	55	26	55	26	SRR957844(23;11),SRR957843(32;15),
AB325691	9377	-	none	GACTA*ATTAT	A	9365	-12	expected	12	10	no	yes	yes	12	10	0	0	SRR957844(5;4),SRR957843(7;6),
AB325691	9378	-	none	TGACT*AATTA	T	9365	-13	expected	10	9	yes	yes	yes	10	9	2	1	SRR957843(7;6),SRR957844(3;3),
I	256456	-	none	TCTAA*TAATG	A	256445	-11	expected	14	8	yes	yes	yes	14	8	13	7	SRR957844(9;4),SRR957843(5;4),
I	256457	-	none	GTCTA*ATAAT	A	256445	-12	expected	1	1	no	no	yes	1	1	0	0	SRR957842(1;1),
I	311191	-	none	TCTAA*CAAGT	A	311180	-11	expected	60	41	yes	yes	yes	60	41	55	36	SRR957844(25;18),SRR957843(35;23),
I	311192	-	none	ATCTA*ACAAG	A	311180	-12	expected	17	13	yes	yes	yes	17	13	4	4	SRR957843(7;7),SRR957844(10;6),
I	311193	-	none	AATCT*AACAA	T	311180	-13	expected	2	2	yes	yes	yes	2	2	2	2	SRR957844(1;1),SRR957842(1;1),
I	375865	-	none	TCCTC*GTTTT	C	375830	-35	expected	1	1	no	no	yes	1	1	0	0	SRR957844(1;1),
I	509497	-	none	ATGAC*TAACA	C	509485	-12	expected	1	1	no	no	yes	1	1	0	0	SRR957843(1;1),
I	528476	-	none	GCTTA*TTTGC	A	528460	-16	expected	1	1	yes	no	yes	1	1	1	1	SRR957843(1;1),
I	879884	-	none	TGTCT*CTCTT	T	879835	-49	expected	2	1	no	no	yes	2	1	0	0	SRR957843(2;1),
I	956284	-	none	GCTAA*TGTAT	A	956272	-12	expected	70	24	yes	yes	yes	70	24	69	23	SRR957844(37;14),SRR957843(33;10),
I	956285	-	none	AGCTA*ATGTA	A	956272	-13	expected	10	8	yes	yes	yes	10	8	2	1	SRR957844(4;3),SRR957843(6;5),
I	1043521	-	none	TCTAA*TTTGT	A	1043512	-9	proximal	2	2	yes	no	yes	2	2	2	2	SRR957843(2;2),
I	1043834	-	none	ACTAA*TTTAT	A	1043789	-45	expected	1	1	yes	no	yes	1	1	1	1	SRR957843(1;1),
I	1135071	-	none	CTAAC*CTGTA	C	1135061	-10	proximal	6	5	yes	yes	yes	6	5	6	5	SRR957844(2;1),SRR957843(4;4),
I	1135075	-	none	TTTCC*TAACC	C	1135061	-14	expected	2	2	no	yes	yes	2	2	0	0	SRR957843(1;1),SRR957844(1;1),
I	1194424	-	none	TCTTA*TGCTA	A	1194407	-17	expected	2	1	yes	no	yes	2	1	2	1	SRR957843(2;1),
I	1353274	-	none	TAGAC*ATAAA	C	1353236	-38	expected	1	1	yes	no	yes	1	1	1	1	SRR957843(1;1),
I	1402477	-	none	TCTGA*CTAAC	A	1402464	-13	expected	3	2	yes	yes	yes	3	2	1	1	SRR957844(2;1),SRR957843(1;1),
I	1402479	-	none	AGTCT*GACTA	T	1402464	-15	expected	3	3	no	no	yes	3	3	0	0	SRR957843(3;3),
I	1457552	-	none	ACTAA*ACGCT	A	1457541	-11	expected	5	5	yes	yes	yes	5	5	4	4	SRR957844(4;4),SRR957843(1;1),
I	1457553	-	none	AACTA*AACGC	A	1457541	-12	expected	1	1	no	no	yes	1	1	0	0	SRR957843(1;1),
I	1506903	-	none	CTTTA*CACAG	A	1506898	-5	proximal	1	1	yes	no	yes	1	1	1	1	SRR957843(1;1),
I	1516678	-	none	GAAGC*TAACA	C	1516663	-15	expected	1	1	no	no	yes	1	1	0	0	SRR957843(1;1),
I	1602612	-	none	ACTTA*TTACT	A	1602593	-19	expected	1	1	no	no	yes	1	1	0	0	SRR957844(1;1),
I	1602688	-	none	ACTAA*AAAGT	A	1602593	-95	distal	1	1	yes	no	yes	1	1	1	1	SRR957843(1;1),
I	1602689	-	none	TACTA*AAAAG	A	1602593	-96	distal	2	2	no	no	yes	2	2	0	0	SRR957843(2;2),
I	1606814	-	none	ATGGC*TAACA	C	1606803	-11	expected	3	2	no	no	yes	3	2	0	0	SRR957843(3;2),
I	1700969	-	none	CTGAC*CTAGA	C	1700959	-10	proximal	3	3	yes	yes	yes	3	3	3	3	SRR957844(1;1),SRR957843(2;2),
I	1738604	-	none	CACTA*ACCCT	A	1738591	-13	expected	2	1	yes	no	yes	2	1	2	1	SRR957843(2;1),
I	1920212	-	none	TATTA*CTAAC	A	1920201	-11	expected	1	1	no	no	yes	1	1	0	0	SRR957844(1;1),
I	2028595	-	none	ACAAA*CGCTT	A	2028573	-22	expected	1	1	yes	no	yes	1	1	1	1	SRR957843(1;1),
I	2116029	-	none	CTAAC*CAATG	C	2116017	-12	expected	4	3	yes	yes	yes	4	3	4	3	SRR957844(1;1),SRR957843(3;2),
I	2116033	-	none	AATAC*TAACC	C	2116017	-16	expected	1	1	yes	no	yes	1	1	1	1	SRR957843(1;1),
I	2156145	-	none	TCGTT*TACCT	T	2156048	-97	distal	1	1	no	no	yes	1	1	0	0	SRR957843(1;1),
I	2396624	-	none	CTAAC*TCCTC	C	2396615	-9	proximal	4	4	yes	yes	yes	4	4	4	4	SRR957844(2;2),SRR957843(2;2),
I	2404263	-	none	TTGGC*TAACC	C	2404250	-13	expected	8	6	no	yes	yes	8	6	0	0	SRR957843(2;1),SRR957844(6;5),
I	2517805	-	none	AGTCT*AACCA	T	2517789	-16	expected	42	27	yes	yes	yes	42	27	38	23	SRR957843(17;12),SRR957844(25;15),
I	2518119	-	none	CAGAA*AAGAT	A	2517789	-330	distal	2	1	no	no	yes	2	1	0	0	SRR957844(2;1),
I	2557858	-	none	CTAAC*CACCT	C	2557848	-10	proximal	4	3	yes	yes	yes	4	3	2	2	SRR957844(2;2),SRR957843(2;1),
I	2672796	-	none	ATAGC*TAACC	C	2672783	-13	expected	2	2	no	no	yes	2	2	0	0	SRR957843(2;2),
I	2693119	-	none	AAAGC*TAACT	C	2693106	-13	expected	2	2	no	yes	yes	2	2	0	0	SRR957843(1;1),SRR957844(1;1),
I	2759303	-	none	TATCT*AACCA	T	2759292	-11	expected	1	1	yes	no	yes	1	1	1	1	SRR957844(1;1),
I	2785696	-	none	ATCAC*TAACA	C	2785684	-12	expected	1	1	no	no	yes	1	1	0	0	SRR957844(1;1),
I	2828365	-	none	TTGGC*TAACA	C	2828349	-16	expected	2	2	no	yes	yes	2	2	0	0	SRR957843(1;1),SRR957844(1;1),
I	3020023	-	none	GTGGC*TAACC	C	3020010	-13	expected	43	23	no	yes	yes	43	23	0	0	SRR957843(23;12),SRR957844(20;11),
I	3020034	-	none	ATAGT*TTCAA	T	3020010	-24	expected	1	1	yes	no	yes	1	1	1	1	SRR957844(1;1),
I	3020107	-	none	CAATA*TTTAA	A	3020010	-97	distal	13	12	yes	yes	yes	13	12	11	11	SRR957844(5;5),SRR957843(8;7),
I	3020108	-	none	ACAAT*ATTTA	T	3020010	-98	distal	2	2	yes	no	yes	2	2	2	2	SRR957843(2;2),
I	3020109	-	none	CACAA*TATTT	A	3020010	-99	distal	1	1	yes	no	yes	1	1	1	1	SRR957843(1;1),
I	3020113	-	none	ATAGC*ACAAT	C	3020010	-103	distal	3	2	yes	no	yes	3	2	3	2	SRR957844(3;2),
I	3050759	-	none	CTAAC*TAATT	C	3050745	-14	expected	6	5	yes	yes	yes	6	5	6	5	SRR957844(4;3),SRR957843(2;2),
I	3051197	-	none	CAAAA*GTGAT	A	3050745	-452	distal	1	1	yes	no	yes	1	1	1	1	SRR957843(1;1),
I	3094165	-	none	TCTAA*TCAAA	A	3090285	-3880	distal	1	1	yes	no	yes	1	1	1	1	SRR957844(1;1),
I	3103580	-	none	CTGAC*AAAAT	C	3103565	-15	expected	2	2	yes	yes	yes	2	2	2	2	SRR957844(1;1),SRR957843(1;1),
I	3187953	-	none	ACTTA*CAAAA	A	3187941	-12	expected	7	5	yes	yes	yes	7	5	7	5	SRR957844(3;3),SRR957843(4;2),
I	3187954	-	none	AACTT*ACAAA	T	3187941	-13	expected	1	1	no	no	yes	1	1	0	0	SRR957843(1;1),
I	3221612	-	none	CTATA*TGAAG	A	3187941	-33671	distal	1	1	yes	no	yes	1	1	1	1	SRR957843(1;1),
I	3258838	-	none	CTGCC*TCAGC	C	3258748	-90	distal	1	1	yes	no	yes	1	1	1	1	SRR957843(1;1),
I	3259073	-	none	TTTAC*TGATG	C	3259053	-20	expected	1	1	yes	no	yes	1	1	1	1	SRR957843(1;1),
I	3366913	-	none	TCTAA*TTACA	A	3366872	-41	expected	5	4	yes	yes	yes	5	4	5	4	SRR957844(2;2),SRR957843(3;2),
I	3393046	-	none	ACTTT*TTGCT	T	3393028	-18	expected	1	1	yes	no	yes	1	1	1	1	SRR957844(1;1),
I	3430353	-	none	CTAAT*TCAAA	T	3430343	-10	proximal	1	1	yes	no	yes	1	1	1	1	SRR957844(1;1),
I	3466018	-	none	CTGAC*ATACT	C	3466006	-12	expected	2	2	yes	no	yes	2	2	2	2	SRR957844(2;2),
I	3466035	-	none	AGCAA*TTAGA	A	3466006	-29	expected	1	1	no	no	yes	1	1	0	0	SRR957844(1;1),
I	3493283	-	none	CTAAC*GCCTT	C	3493274	-9	proximal	1	1	yes	no	yes	1	1	1	1	SRR957843(1;1),
I	3527501	-	none	TTAAC*AAATT	C	3527493	-8	proximal	1	1	no	no	yes	1	1	0	0	SRR957844(1;1),
I	3584623	-	none	TATAT*TGCAG	T	3583995	-628	distal	1	1	no	no	yes	1	1	0	0	SRR957843(1;1),
I	3639271	-	none	ACTTA*CATAT	A	3639264	-7	proximal	1	1	yes	no	yes	1	1	1	1	SRR957844(1;1),
I	3639274	-	none	CTAAC*TTACA	C	3639264	-10	proximal	1	1	no	no	yes	1	1	0	0	SRR957844(1;1),
I	3798237	-	none	CAATC*TAACA	C	3798226	-11	expected	1	1	no	no	yes	1	1	0	0	SRR957843(1;1),
I	3798242	-	none	CTAAA*CAATC	A	3798226	-16	expected	1	1	yes	no	yes	1	1	1	1	SRR957843(1;1),
I	3798243	-	none	TCTAA*ACAAT	A	3798226	-17	expected	26	21	yes	yes	yes	26	21	23	18	SRR957843(15;12),SRR957844(11;9),
I	3798244	-	none	TTCTA*AACAA	A	3798226	-18	expected	5	5	yes	yes	yes	5	5	1	1	SRR957843(4;4),SRR957844(1;1),
I	3798245	-	none	TTTCT*AAACA	T	3798226	-19	expected	3	3	yes	yes	yes	3	3	2	2	SRR957843(1;1),SRR957844(2;2),
I	3821050	-	none	CCTAA*CTAAC	A	3821033	-17	expected	4	4	yes	yes	yes	4	4	4	4	SRR957844(1;1),SRR957843(3;3),
I	3821052	-	none	GACCT*AACTA	T	3821033	-19	expected	1	1	no	no	yes	1	1	0	0	SRR957843(1;1),
I	3915130	-	none	CTGAT*GTCTA	T	3915124	-6	proximal	4	4	no	yes	yes	4	4	0	0	SRR957844(3;3),SRR957843(1;1),
I	3942683	-	none	CTAAC*GACTT	C	3942669	-14	expected	6	5	yes	yes	yes	6	5	6	5	SRR957844(3;3),SRR957843(3;2),
I	4007241	-	none	AAGTC*TGAGA	C	4007148	-93	distal	1	1	yes	no	yes	1	1	1	1	SRR957844(1;1),
I	4034967	-	none	CAAGC*TAACC	C	4034949	-18	expected	1	1	no	no	yes	1	1	0	0	SRR957844(1;1),
I	4066507	-	none	TAGAC*TGACG	C	4066491	-16	expected	1	1	yes	no	yes	1	1	1	1	SRR957843(1;1),
I	4133316	-	none	ACTAA*TTGCA	A	4133299	-17	expected	14	8	yes	yes	yes	14	8	14	8	SRR957843(7;3),SRR957844(7;5),
I	4133318	-	none	TAACT*AATTG	T	4133299	-19	expected	10	6	no	yes	yes	10	6	0	0	SRR957841(1;1),SRR957844(7;3),SRR957843(2;2),
I	4138874	-	none	GAGTT*GCAAT	T	4138718	-156	distal	2	1	yes	no	yes	2	1	2	1	SRR957844(2;1),
I	4393582	-	none	ACTAA*TTTGT	A	4393572	-10	proximal	15	9	yes	yes	yes	15	9	15	9	SRR957844(7;5),SRR957843(8;4),
I	4393583	-	none	AACTA*ATTTG	A	4393572	-11	expected	1	1	no	no	yes	1	1	0	0	SRR957843(1;1),
I	4426275	-	none	CTAAC*GTATC	C	4426268	-7	proximal	2	2	yes	yes	yes	2	2	2	2	SRR957843(1;1),SRR957844(1;1),
I	4602992	-	none	TCTAA*CAATT	A	4602981	-11	expected	10	10	yes	yes	yes	10	10	7	7	SRR957844(4;4),SRR957843(6;6),
I	4602993	-	none	ATCTA*ACAAT	A	4602981	-12	expected	3	2	no	no	yes	3	2	0	0	SRR957844(3;2),
I	4733338	-	none	CTGAC*ATACT	C	4733328	-10	proximal	1	1	yes	no	yes	1	1	1	1	SRR957843(1;1),
I	4733343	-	none	GTTTA*CTGAC	A	4733328	-15	expected	3	2	yes	yes	yes	3	2	3	2	SRR957843(1;1),SRR957844(2;1),
I	4733353	-	none	GAAAC*AAAAT	C	4733328	-25	expected	2	1	yes	no	yes	2	1	2	1	SRR957844(2;1),
I	4733611	-	none	CTTAA*CTAAT	A	4733599	-12	expected	2	2	yes	yes	yes	2	2	2	2	SRR957844(1;1),SRR957843(1;1),
I	4752051	-	none	TCTCA*TCAGC	A	4752034	-17	expected	1	1	yes	no	yes	1	1	1	1	SRR957844(1;1),
I	4825773	-	none	TTTCA*CTAAT	A	4825754	-19	expected	1	1	yes	no	yes	1	1	1	1	SRR957843(1;1),
I	4859837	-	none	GCCTT*GTACT	T	4859813	-24	expected	1	1	no	no	yes	1	1	0	0	SRR957844(1;1),
I	4861048	-	none	GCTTA*ATTAA	A	4861028	-20	expected	1	1	yes	no	yes	1	1	1	1	SRR957843(1;1),
I	4861113	-	none	AAGTG*GTTCC	G	4861028	-85	distal	1	1	yes	no	yes	1	1	1	1	SRR957843(1;1),
I	4872585	-	none	CTAAT*ATAGA	T	4872572	-13	expected	1	1	no	no	yes	1	1	0	0	SRR957843(1;1),
I	4927017	-	none	TTTAA*CACAT	A	4927003	-14	expected	2	2	yes	no	yes	2	2	2	2	SRR957844(2;2),
I	4972680	-	none	ACTCA*CTTGC	A	4972662	-18	expected	2	1	yes	no	yes	2	1	2	1	SRR957843(2;1),
I	5008571	-	none	AAGCT*GAAAT	T	5008344	-227	distal	1	1	no	no	yes	1	1	0	0	SRR957843(1;1),
I	5017070	-	none	CTTGC*TAACC	C	5017059	-11	expected	1	1	no	no	yes	1	1	0	0	SRR957843(1;1),
I	5017268	-	none	GATCA*GTATA	A	5017252	-16	expected	21	13	no	yes	yes	21	13	0	0	SRR957844(8;6),SRR957842(2;2),SRR957843(11;5),
I	5073200	-	none	TCTAA*CTAAC	A	5073188	-12	expected	2	2	yes	yes	yes	2	2	2	2	SRR957844(1;1),SRR957843(1;1),
I	5073226	-	none	ATACA*TTCAA	A	5073188	-38	expected	1	1	yes	no	yes	1	1	1	1	SRR957843(1;1),
I	5073559	-	none	AGAGA*GAAAA	A	5073449	-110	distal	1	1	yes	no	yes	1	1	1	1	SRR957843(1;1),
I	5353436	-	none	TAACT*TATGT	T	5353425	-11	expected	1	1	no	no	yes	1	1	0	0	SRR957843(1;1),
I	5353437	-	none	TTAAC*TTATG	C	5353425	-12	expected	2	2	yes	no	yes	2	2	2	2	SRR957844(2;2),
I	5365974	-	none	TCTAA*CAAGT	A	5365964	-10	proximal	3	3	yes	yes	yes	3	3	3	3	SRR957844(2;2),SRR957843(1;1),
I	5365989	-	none	ATTCA*CAACC	A	5365964	-25	expected	1	1	yes	no	yes	1	1	1	1	SRR957843(1;1),
I	5384092	-	none	CTGAC*TAAGT	C	5384083	-9	proximal	6	4	yes	yes	yes	6	4	6	4	SRR957844(4;3),SRR957843(2;1),
I	5384774	-	none	ACTAA*TGTTG	A	5384758	-16	expected	12	10	yes	yes	yes	12	10	11	9	SRR957843(8;6),SRR957844(4;4),
I	5384775	-	none	AACTA*ATGTT	A	5384758	-17	expected	2	1	no	no	yes	2	1	0	0	SRR957843(2;1),
I	5459186	-	none	GCTAA*TTTCT	A	5459173	-13	expected	18	13	yes	yes	yes	18	13	18	13	SRR957844(7;6),SRR957843(11;7),
I	5459188	-	none	CCGCT*AATTT	T	5459173	-15	expected	2	2	yes	yes	yes	2	2	1	1	SRR957844(1;1),SRR957843(1;1),
I	290167	+	none	AACTT*ACTAA	T	290186	-19	expected	1	1	yes	no	yes	1	1	1	1	SRR957843(1;1),
I	290173	+	none	CTAAC*AAATA	C	290186	-13	expected	1	1	yes	no	yes	1	1	1	1	SRR957843(1;1),
I	303318	+	none	TTCTA*ATTAC	A	303333	-15	expected	1	1	no	no	yes	1	1	0	0	SRR957843(1;1),
I	303319	+	none	TCTAA*TTACT	A	303333	-14	expected	12	10	yes	yes	yes	12	10	12	10	SRR957843(8;7),SRR957844(4;3),
I	306302	+	none	CTTAC*TTATT	C	306315	-13	expected	1	1	yes	no	yes	1	1	1	1	SRR957843(1;1),
I	306304	+	none	TACTT*ATTGG	T	306315	-11	expected	1	1	no	no	yes	1	1	0	0	SRR957844(1;1),
I	306305	+	none	ACTTA*TTGGC	A	306315	-10	proximal	14	9	yes	yes	yes	14	9	14	9	SRR957843(11;6),SRR957844(3;3),
I	366951	+	none	AGTCT*AACTT	T	366967	-16	expected	2	1	yes	no	yes	2	1	2	1	SRR957844(2;1),
I	366953	+	none	TCTAA*CTTAT	A	366967	-14	expected	2	2	yes	yes	yes	2	2	2	2	SRR957843(1;1),SRR957844(1;1),
I	384974	+	none	CTAAT*TGCTG	T	384985	-11	expected	1	1	no	no	yes	1	1	0	0	SRR957843(1;1),
I	564541	+	none	TCTCT*GACAA	T	564552	-11	expected	3	3	no	no	yes	3	3	0	0	SRR957844(3;3),
I	564556	+	none	GCTTA*CACAC	A	570548	-5992	distal	3	3	yes	yes	yes	3	3	2	2	SRR957843(1;1),SRR957844(2;2),
I	570534	+	none	TCTAA*CTTAT	A	570548	-14	expected	7	7	yes	yes	yes	7	7	7	7	SRR957844(4;4),SRR957843(3;3),
I	684327	+	none	TTAGC*TAACT	C	684344	-17	expected	10	10	no	yes	yes	10	10	0	0	SRR957844(3;3),SRR957843(7;7),
I	686974	+	none	GGTAT*TAACC	T	686988	-14	expected	1	1	no	no	yes	1	1	0	0	SRR957843(1;1),
I	706807	+	none	GTCTA*ATGCA	A	711767	-4960	distal	1	1	yes	no	yes	1	1	1	1	SRR957844(1;1),
I	750096	+	none	TACGC*TAACT	C	750112	-16	expected	2	1	no	no	yes	2	1	0	0	SRR957843(2;1),
I	895587	+	none	CTTAC*AATAT	C	895596	-9	proximal	2	2	yes	yes	yes	2	2	1	1	SRR957844(1;1),SRR957843(1;1),
I	960591	+	none	TGTAA*CTAAC	A	960607	-16	expected	1	1	yes	no	yes	1	1	1	1	SRR957843(1;1),
I	1030788	+	none	TGGCT*AATAA	T	1030810	-22	expected	1	1	no	no	yes	1	1	0	0	SRR957844(1;1),
I	1030790	+	none	GCTAA*TAATC	A	1030810	-20	expected	10	7	yes	yes	yes	10	7	10	7	SRR957843(3;2),SRR957844(7;5),
I	1042054	+	none	TATCT*AACAC	T	1042069	-15	expected	7	5	yes	yes	yes	7	5	1	1	SRR957844(3;2),SRR957843(4;3),
I	1042055	+	none	ATCTA*ACACC	A	1042069	-14	expected	2	2	no	yes	yes	2	2	0	0	SRR957843(1;1),SRR957844(1;1),
I	1042056	+	none	TCTAA*CACCT	A	1042069	-13	expected	2	1	yes	no	yes	2	1	2	1	SRR957843(2;1),
I	1225795	+	none	ATTAA*TAACA	A	1225810	-15	expected	1	1	yes	no	yes	1	1	1	1	SRR957843(1;1),
I	1368795	+	none	TCTTA*TTAAT	A	1368807	-12	expected	4	4	yes	yes	yes	4	4	2	2	SRR957843(1;1),SRR957844(3;3),
I	1575657	+	none	ATTGC*TTACC	C	1575672	-15	expected	1	1	no	no	yes	1	1	0	0	SRR957844(1;1),
I	1575661	+	none	CTTAC*CTTCA	C	1575672	-11	expected	1	1	no	no	yes	1	1	0	0	SRR957843(1;1),
I	1604474	+	none	TCTTT*CTTTG	T	1604529	-55	expected	1	1	no	no	yes	1	1	0	0	SRR957843(1;1),
I	1604513	+	none	CTGAC*TGACA	C	1604529	-16	expected	1	1	yes	no	yes	1	1	1	1	SRR957844(1;1),
I	1604514	+	none	TGACT*GACAT	T	1604529	-15	expected	1	1	no	no	yes	1	1	0	0	SRR957843(1;1),
I	1604516	+	none	ACTGA*CATTT	A	1604529	-13	expected	15	11	yes	yes	yes	15	11	15	11	SRR957844(6;5),SRR957843(9;6),
I	1696806	+	none	ATTAA*CCAAA	A	1696831	-25	expected	2	2	yes	yes	yes	2	2	1	1	SRR957844(1;1),SRR957843(1;1),
I	1838954	+	none	TACTA*AACTG	A	1838969	-15	expected	6	5	yes	yes	yes	6	5	2	1	SRR957844(2;2),SRR957843(4;3),
I	1838955	+	none	ACTAA*ACTGC	A	1838969	-14	expected	8	6	yes	yes	yes	8	6	7	5	SRR957843(3;3),SRR957844(5;3),
I	1838956	+	none	CTAAA*CTGCT	A	1838969	-13	expected	3	2	yes	no	yes	3	2	3	2	SRR957844(3;2),
I	1900378	+	none	CTGAC*AAATT	C	1900385	-7	proximal	1	1	yes	no	yes	1	1	1	1	SRR957843(1;1),
I	1977545	+	none	TCTTA*CTTTT	A	1977555	-10	proximal	2	1	yes	no	yes	2	1	2	1	SRR957844(2;1),
I	2145901	+	none	ATGTT*GCAGT	T	2145926	-25	expected	1	1	no	no	yes	1	1	0	0	SRR957844(1;1),
I	2216468	+	none	TAATT*AACTA	T	2216485	-17	expected	2	2	no	no	yes	2	2	0	0	SRR957843(2;2),
I	2216469	+	none	AATTA*ACTAA	A	2216485	-16	expected	4	4	yes	no	yes	4	4	1	1	SRR957843(4;4),
I	2216470	+	none	ATTAA*CTAAT	A	2216485	-15	expected	115	49	yes	yes	yes	115	49	107	42	SRR957841(1;1),SRR957843(59;26),SRR957844(55;22),
I	2348412	+	none	ACTTA*CTAAC	A	2348424	-12	expected	1	1	yes	no	yes	1	1	1	1	SRR957843(1;1),
I	2426405	+	none	CTAAT*CATAA	T	2426413	-8	proximal	1	1	yes	no	yes	1	1	1	1	SRR957843(1;1),
I	2439750	+	none	TAGAA*AAACC	A	2439854	-104	distal	1	1	yes	no	yes	1	1	1	1	SRR957844(1;1),
I	2439843	+	none	CTAAC*ATCTA	C	2439854	-11	expected	2	2	yes	yes	yes	2	2	2	2	SRR957844(1;1),SRR957843(1;1),
I	2446039	+	none	TTAAC*CTAAA	C	2446051	-12	expected	1	1	yes	no	yes	1	1	1	1	SRR957844(1;1),
I	2446060	+	none	ACGAA*CGCTT	A	2465445	-19385	distal	2	1	yes	no	yes	2	1	2	1	SRR957843(2;1),
I	2643843	+	none	TTAAT*CGTTT	T	2643859	-16	expected	1	1	no	no	yes	1	1	0	0	SRR957843(1;1),
I	2643844	+	none	TAATC*GTTTT	C	2643859	-15	expected	2	1	yes	no	yes	2	1	2	1	SRR957844(2;1),
I	2700640	+	none	ATTTA*TACTA	A	2700657	-17	expected	1	1	yes	no	yes	1	1	1	1	SRR957843(1;1),
I	2700647	+	none	CTAAT*TGTTG	T	2700657	-10	proximal	4	3	no	yes	yes	4	3	0	0	SRR957844(2;1),SRR957843(2;2),
I	2708761	+	none	TGTAT*TAACA	T	2708778	-17	expected	1	1	yes	no	yes	1	1	1	1	SRR957844(1;1),
I	2830786	+	none	AACTA*ACAAT	A	2830798	-12	expected	2	2	no	no	yes	2	2	0	0	SRR957843(2;2),
I	3384709	+	none	AAAGT*CGAAA	T	3384744	-35	expected	1	1	no	no	yes	1	1	0	0	SRR957844(1;1),
I	3499356	+	none	AAATA*GATCG	A	3499428	-72	distal	2	2	yes	yes	yes	2	2	2	2	SRR957843(1;1),SRR957844(1;1),
I	3505304	+	none	CTAAT*ATTTA	T	3505310	-6	proximal	1	1	no	no	yes	1	1	0	0	SRR957843(1;1),
I	3515916	+	none	TAACT*AACTA	T	3515932	-16	expected	1	1	no	no	yes	1	1	0	0	SRR957843(1;1),
I	3515918	+	none	ACTAA*CTAAC	A	3515932	-14	expected	3	3	yes	yes	yes	3	3	3	3	SRR957843(2;2),SRR957844(1;1),
I	3528752	+	none	CTAAT*ATATC	T	3528762	-10	proximal	1	1	no	no	yes	1	1	0	0	SRR957844(1;1),
I	3530600	+	none	TTGGC*TAACC	C	3530614	-14	expected	3	3	no	yes	yes	3	3	0	0	SRR957843(2;2),SRR957844(1;1),
I	3612784	+	none	TTTTA*AAGAG	A	3612876	-92	distal	1	1	yes	no	yes	1	1	1	1	SRR957843(1;1),
I	3643593	+	none	TTTTA*CCCTT	A	3643633	-40	expected	1	1	yes	no	yes	1	1	1	1	SRR957843(1;1),
I	3649927	+	none	CTCTA*ATAAA	A	3649938	-11	expected	5	5	yes	yes	yes	5	5	1	1	SRR957843(4;4),SRR957844(1;1),
I	3649928	+	none	TCTAA*TAAAA	A	3649938	-10	proximal	108	32	yes	yes	yes	108	32	108	32	SRR957844(47;14),SRR957843(61;18),
I	3667293	+	none	TTATA*CTAAT	A	3667313	-20	expected	8	7	yes	yes	yes	8	7	8	7	SRR957844(1;1),SRR957843(7;6),
I	3667298	+	none	CTAAT*CATTC	T	3667313	-15	expected	4	3	no	yes	yes	4	3	0	0	SRR957843(3;2),SRR957844(1;1),
I	3693285	+	none	ATTTA*TACTA	A	3693302	-17	expected	1	1	yes	no	yes	1	1	1	1	SRR957843(1;1),
I	3722878	+	none	GTGGT*TGAAT	T	3722998	-120	distal	1	1	no	no	yes	1	1	0	0	SRR957843(1;1),
I	3730478	+	none	CTAAC*TACTT	C	3730493	-15	expected	1	1	yes	no	yes	1	1	1	1	SRR957843(1;1),
I	3731871	+	none	GTTTA*TTACT	A	3731892	-21	expected	1	1	yes	no	yes	1	1	1	1	SRR957844(1;1),
I	3843744	+	none	CCTAT*GCATT	T	3843765	-21	expected	1	1	no	no	yes	1	1	0	0	SRR957843(1;1),
I	3869534	+	none	CTAAC*CAATC	C	3869547	-13	expected	18	10	yes	yes	yes	18	10	14	8	SRR957844(13;7),SRR957843(5;3),
I	4224557	+	none	TATAC*AACTT	C	4224581	-24	expected	2	1	no	no	yes	2	1	0	0	SRR957844(2;1),
I	4224559	+	none	TACAA*CTTCT	A	4224581	-22	expected	2	1	no	no	yes	2	1	0	0	SRR957843(2;1),
I	4227301	+	none	ATAAT*GTACT	T	4227316	-15	expected	1	1	no	no	yes	1	1	0	0	SRR957843(1;1),
I	4227305	+	none	TGTAC*TAACT	C	4227316	-11	expected	1	1	yes	no	yes	1	1	1	1	SRR957844(1;1),
I	4481878	+	none	ATTAT*TAACG	T	4481892	-14	expected	1	1	no	no	yes	1	1	0	0	SRR957841(1;1),
I	4502979	+	none	TTGAC*TAACA	C	4502994	-15	expected	1	1	no	no	yes	1	1	0	0	SRR957843(1;1),
I	4723169	+	none	ACTAA*ACTAA	A	4723375	-206	distal	3	3	yes	yes	yes	3	3	2	2	SRR957843(2;2),SRR957844(1;1),
I	4767694	+	none	TTTTA*CTAAT	A	4767710	-16	expected	1	1	no	no	yes	1	1	0	0	SRR957843(1;1),
I	4767699	+	none	CTAAT*ATGTG	T	4767710	-11	expected	1	1	no	no	yes	1	1	0	0	SRR957843(1;1),
I	4774353	+	none	AAGGC*TAACC	C	4774366	-13	expected	43	13	no	yes	yes	43	13	0	0	SRR957843(28;7),SRR957844(15;6),
I	4874363	+	none	ACAGG*GTACT	G	4874383	-20	expected	2	2	no	yes	yes	2	2	0	0	SRR957844(1;1),SRR957843(1;1),
I	4902117	+	none	ACTTA*CTAAC	A	4902132	-15	expected	2	2	yes	yes	yes	2	2	2	2	SRR957844(1;1),SRR957843(1;1),
I	4978871	+	none	ACTCA*CACAT	A	4978880	-9	proximal	12	12	yes	yes	yes	12	12	9	9	SRR957844(7;7),SRR957843(5;5),
I	4978872	+	none	CTCAC*ACATT	C	4978880	-8	proximal	2	1	no	no	yes	2	1	0	0	SRR957844(2;1),
I	5004884	+	none	TATCT*AACAA	T	5004902	-18	expected	1	1	no	no	yes	1	1	0	0	SRR957843(1;1),
I	5257003	+	none	CTAAT*TGTCC	T	5257012	-9	proximal	35	12	yes	yes	yes	35	12	35	12	SRR957843(20;7),SRR957844(15;5),
I	5257004	+	none	TAATT*GTCCC	T	5257012	-8	proximal	4	2	yes	yes	yes	4	2	4	2	SRR957843(2;1),SRR957844(2;1),
I	5329865	+	none	CTAAC*TGCTT	C	5329877	-12	expected	1	1	yes	no	yes	1	1	1	1	SRR957843(1;1),
I	5359284	+	none	GAAAC*ATATC	C	5359550	-266	distal	2	1	yes	no	yes	2	1	2	1	SRR957844(2;1),
I	5359542	+	none	CTAAC*TGAAA	C	5359550	-8	proximal	36	21	yes	yes	yes	36	21	29	16	SRR957844(17;8),SRR957843(19;13),
I	5368200	+	none	AATGC*TAACC	C	5368217	-17	expected	2	2	yes	yes	yes	2	2	1	1	SRR957843(1;1),SRR957844(1;1),
I	5368204	+	none	CTAAC*CGATA	C	5368217	-13	expected	1	1	yes	no	yes	1	1	1	1	SRR957844(1;1),
I	5428818	+	none	CTTTT*TGGTT	T	5429118	-300	distal	1	1	no	no	yes	1	1	0	0	SRR957844(1;1),
I	5428876	+	none	ACTTA*CATAC	A	5429118	-242	distal	1	1	yes	no	yes	1	1	1	1	SRR957843(1;1),
II	259721	-	none	CGATT*TACTA	T	259704	-17	expected	1	1	no	no	yes	1	1	0	0	SRR957844(1;1),
II	259724	-	none	GAGCG*ATTTA	G	259704	-20	expected	2	2	yes	yes	yes	2	2	2	2	SRR957844(1;1),SRR957843(1;1),
II	259725	-	none	AGAGC*GATTT	C	259704	-21	expected	2	1	yes	no	yes	2	1	2	1	SRR957844(2;1),
II	259728	-	none	TAAAG*AGCGA	G	259704	-24	expected	1	1	yes	no	yes	1	1	1	1	SRR957843(1;1),
II	296318	-	none	TAACC*AAACC	C	296306	-12	expected	1	1	yes	no	yes	1	1	1	1	SRR957843(1;1),
II	296319	-	none	CTAAC*CAAAC	C	296306	-13	expected	9	6	yes	yes	yes	9	6	9	6	SRR957844(6;3),SRR957843(3;3),
II	343865	-	none	AAGGC*TAACA	C	343849	-16	expected	1	1	no	no	yes	1	1	0	0	SRR957844(1;1),
II	493091	-	none	CTAAT*TCGTT	T	493083	-8	proximal	5	5	no	yes	yes	5	5	0	0	SRR957843(3;3),SRR957844(2;2),
II	493107	-	none	ACGAA*AATCA	A	493083	-24	expected	2	1	yes	no	yes	2	1	2	1	SRR957843(2;1),
II	604307	-	none	ATTTA*CTCTT	A	604096	-211	distal	1	1	yes	no	yes	1	1	1	1	SRR957843(1;1),
II	616177	-	none	CTAAC*CAATA	C	616163	-14	expected	5	4	yes	yes	yes	5	4	4	3	SRR957844(3;2),SRR957843(2;2),
II	789909	-	none	TCTAA*CATCT	A	789896	-13	expected	1	1	yes	no	yes	1	1	1	1	SRR957843(1;1),
II	802670	-	none	CTAAT*ACACA	T	802651	-19	expected	1	1	no	no	yes	1	1	0	0	SRR957844(1;1),
II	888153	-	none	CTAAT*ATATG	T	888142	-11	expected	1	1	no	no	yes	1	1	0	0	SRR957843(1;1),
II	1088585	-	none	CTAAT*CGATG	T	1088574	-11	expected	1	1	no	no	yes	1	1	0	0	SRR957843(1;1),
II	1131864	-	none	ATACA*TAAAC	A	1131823	-41	expected	1	1	no	no	yes	1	1	0	0	SRR957843(1;1),
II	1238655	-	none	GCATC*GTGAA	C	1238600	-55	expected	1	1	no	no	yes	1	1	0	0	SRR957843(1;1),
II	1238926	-	none	CTAAC*GAAAA	C	1238915	-11	expected	1	1	no	no	yes	1	1	0	0	SRR957844(1;1),
II	1238930	-	none	TCTAC*TAACG	C	1238915	-15	expected	1	1	yes	no	yes	1	1	1	1	SRR957844(1;1),
II	1450811	-	none	TTAAC*CAACA	C	1450794	-17	expected	1	1	no	no	yes	1	1	0	0	SRR957843(1;1),
II	1535483	-	none	CGCTC*GTACT	C	1535464	-19	expected	3	2	no	no	yes	3	2	0	0	SRR957843(3;2),
II	1756081	-	none	TGTCT*GACTT	T	1756042	-39	expected	1	1	no	no	yes	1	1	0	0	SRR957843(1;1),
II	1759866	-	none	CTAAC*CATTA	C	1759860	-6	proximal	1	1	yes	no	yes	1	1	1	1	SRR957844(1;1),
II	1776569	-	none	TTAGC*TAACT	C	1776549	-20	expected	7	6	no	yes	yes	7	6	0	0	SRR957843(6;5),SRR957844(1;1),
II	1920005	-	none	TCTAA*CATAT	A	1919988	-17	expected	23	11	yes	yes	yes	23	11	23	11	SRR957843(10;6),SRR957844(13;5),
II	1920006	-	none	ATCTA*ACATA	A	1919988	-18	expected	1	1	no	no	yes	1	1	0	0	SRR957843(1;1),
II	1920007	-	none	TATCT*AACAT	T	1919988	-19	expected	4	3	yes	yes	yes	4	3	2	1	SRR957844(2;1),SRR957843(2;2),
II	2264890	-	none	ACATA*ACTAA	A	2264873	-17	expected	1	1	yes	no	yes	1	1	1	1	SRR957843(1;1),
II	2293788	-	none	ATTCT*CTAAC	T	2293775	-13	expected	1	1	no	no	yes	1	1	0	0	SRR957844(1;1),
II	2349115	-	none	ATTAA*TTGCT	A	2349095	-20	expected	1	1	yes	no	yes	1	1	1	1	SRR957844(1;1),
II	2394626	-	none	AAAAC*TAACA	C	2394609	-17	expected	2	1	yes	no	yes	2	1	2	1	SRR957844(2;1),
II	2450520	-	none	TTTTA*CTAAT	A	2450505	-15	expected	1	1	yes	no	yes	1	1	1	1	SRR957843(1;1),
II	2522639	-	none	CTAAC*CACAA	C	2522624	-15	expected	5	5	yes	yes	yes	5	5	2	2	SRR957844(3;3),SRR957843(2;2),
II	2522643	-	none	TTTGC*TAACC	C	2522624	-19	expected	2	2	no	no	yes	2	2	0	0	SRR957843(2;2),
II	2575112	-	none	TCCAC*TAACT	C	2575096	-16	expected	1	1	no	no	yes	1	1	0	0	SRR957843(1;1),
II	2592869	-	none	AAAAC*TTAAA	C	2592846	-23	expected	1	1	yes	no	yes	1	1	1	1	SRR957844(1;1),
II	2592870	-	none	AAAAA*CTTAA	A	2592846	-24	expected	1	1	no	no	yes	1	1	0	0	SRR957843(1;1),
II	2592871	-	none	GAAAA*ACTTA	A	2592846	-25	expected	2	2	yes	no	yes	2	2	1	1	SRR957844(2;2),
II	2664356	-	none	TCTGA*TACTT	A	2664236	-120	distal	1	1	yes	no	yes	1	1	1	1	SRR957844(1;1),
II	2681347	-	none	ATAAC*AAAGT	C	2681338	-9	proximal	2	2	yes	no	yes	2	2	2	2	SRR957843(2;2),
II	2681348	-	none	AATAA*CAAAG	A	2681338	-10	proximal	30	19	yes	yes	yes	30	19	22	12	SRR957843(17;10),SRR957844(13;9),
II	2681349	-	none	AAATA*ACAAA	A	2681338	-11	expected	2	1	yes	no	yes	2	1	2	1	SRR957843(2;1),
II	2681350	-	none	GAAAT*AACAA	T	2681338	-12	expected	6	4	no	no	yes	6	4	0	0	SRR957843(6;4),
II	2681358	-	none	CTAGA*ACTGA	A	2681338	-20	expected	1	1	yes	no	yes	1	1	1	1	SRR957844(1;1),
II	2960714	-	none	CTGAC*TCCTT	C	2960702	-12	expected	1	1	yes	no	yes	1	1	1	1	SRR957843(1;1),
II	2962211	-	none	TCTAA*CCAAA	A	2962199	-12	expected	1	1	yes	no	yes	1	1	1	1	SRR957844(1;1),
II	2962422	-	none	CTAAC*TGATG	C	2962409	-13	expected	1	1	yes	no	yes	1	1	1	1	SRR957844(1;1),
II	3003550	-	none	TCTAA*CAAAC	A	3003537	-13	expected	1	1	yes	no	yes	1	1	1	1	SRR957843(1;1),
II	3065046	-	none	ATAGT*AACAA	T	3065032	-14	expected	1	1	no	no	yes	1	1	0	0	SRR957844(1;1),
II	3116099	-	none	GAATA*AGTTG	A	3116079	-20	expected	1	1	yes	no	yes	1	1	1	1	SRR957843(1;1),
II	3253008	-	none	TCATT*AATCA	T	3252799	-209	distal	2	1	no	no	yes	2	1	0	0	SRR957843(2;1),
II	3385270	-	none	GTTAT*TAACT	T	3385257	-13	expected	2	1	no	no	yes	2	1	0	0	SRR957843(2;1),
II	3385277	-	none	CAGAA*GTGTT	A	3385257	-20	expected	1	1	yes	no	yes	1	1	1	1	SRR957843(1;1),
II	3433024	-	none	TTTGC*TCACC	C	3433005	-19	expected	2	1	no	no	yes	2	1	0	0	SRR957844(2;1),
II	3583612	-	none	CTAAT*CTATA	T	3583600	-12	expected	1	1	no	no	yes	1	1	0	0	SRR957844(1;1),
II	3620283	-	none	GATAT*TAACA	T	3620272	-11	expected	1	1	yes	no	yes	1	1	1	1	SRR957843(1;1),
II	3684944	-	none	ACTTA*ACTGC	A	3684928	-16	expected	2	2	yes	no	yes	2	2	1	1	SRR957843(2;2),
II	3685161	-	none	GCTAA*TTAAT	A	3685150	-11	expected	93	33	yes	yes	yes	93	33	83	25	SRR957843(51;20),SRR957844(42;13),
II	3685162	-	none	GGCTA*ATTAA	A	3685150	-12	expected	7	6	no	yes	yes	7	6	0	0	SRR957843(4;4),SRR957844(3;2),
II	3685163	-	none	AGGCT*AATTA	T	3685150	-13	expected	2	2	no	yes	yes	2	2	0	0	SRR957843(1;1),SRR957844(1;1),
II	4008834	-	none	AGGTA*CTAAC	A	4008819	-15	expected	1	1	no	no	yes	1	1	0	0	SRR957844(1;1),
II	4009198	-	none	AAAGG*GGATT	G	4009176	-22	expected	1	1	no	no	yes	1	1	0	0	SRR957843(1;1),
II	4070531	-	none	TCACT*AACAA	T	4070510	-21	expected	1	1	no	no	yes	1	1	0	0	SRR957844(1;1),
II	4125361	-	none	CTAAC*GACCT	C	4125348	-13	expected	1	1	yes	no	yes	1	1	1	1	SRR957843(1;1),
II	4221921	-	none	TTGGC*TAACA	C	4221906	-15	expected	61	21	no	yes	yes	61	21	0	0	SRR957843(41;11),SRR957844(20;10),
II	4222402	-	none	TTTTA*CATAT	A	4222381	-21	expected	1	1	yes	no	yes	1	1	1	1	SRR957843(1;1),
II	4239046	-	none	CTGAC*CAATT	C	4239038	-8	proximal	8	6	yes	yes	yes	8	6	8	6	SRR957844(2;2),SRR957843(6;4),
II	4239054	-	none	CTAAA*GTACT	A	4239038	-16	expected	1	1	no	no	yes	1	1	0	0	SRR957843(1;1),
II	4239055	-	none	TCTAA*AGTAC	A	4239038	-17	expected	1	1	yes	no	yes	1	1	1	1	SRR957843(1;1),
II	4241873	-	none	TCTTA*CTAAT	A	4241858	-15	expected	1	1	yes	no	yes	1	1	1	1	SRR957843(1;1),
II	4342930	-	none	CTAAC*TAGCC	C	4342921	-9	proximal	4	4	yes	no	yes	4	4	3	3	SRR957843(4;4),
II	4342934	-	none	ATTGC*TAACT	C	4342921	-13	expected	2	2	no	no	yes	2	2	0	0	SRR957843(2;2),
II	4342944	-	none	CCGTT*GTTCT	T	4342921	-23	expected	2	2	yes	no	yes	2	2	1	1	SRR957843(2;2),
II	4342947	-	none	AACCC*GTTGT	C	4342921	-26	expected	1	1	no	no	yes	1	1	0	0	SRR957844(1;1),
II	4345117	-	none	AAGTG*ATGCT	G	4345099	-18	expected	1	1	yes	no	yes	1	1	1	1	SRR957844(1;1),
II	4387114	-	none	ATGCC*ATCTT	C	4387005	-109	distal	1	1	no	no	yes	1	1	0	0	SRR957844(1;1),
II	231716	+	none	TTGGC*TAACG	C	231736	-20	expected	2	2	no	no	yes	2	2	0	0	SRR957843(2;2),
II	265585	+	none	TCTTA*CTGAC	A	265604	-19	expected	1	1	yes	no	yes	1	1	1	1	SRR957844(1;1),
II	365749	+	none	GAGCA*ATACT	A	365765	-16	expected	1	1	yes	no	yes	1	1	1	1	SRR957843(1;1),
II	365757	+	none	CTAAT*TGTTA	T	365765	-8	proximal	1	1	no	no	yes	1	1	0	0	SRR957843(1;1),
II	413844	+	none	GGTCT*TTCCA	T	413893	-49	expected	1	1	no	no	yes	1	1	0	0	SRR957843(1;1),
II	413879	+	none	CTAAC*TTATA	C	413893	-14	expected	1	1	no	no	yes	1	1	0	0	SRR957844(1;1),
II	433180	+	none	CTTTA*CACAT	A	433203	-23	expected	4	4	yes	yes	yes	4	4	4	4	SRR957844(1;1),SRR957843(3;3),
II	433188	+	none	ATTTT*CTAAT	T	433203	-15	expected	1	1	no	no	yes	1	1	0	0	SRR957843(1;1),
II	517665	+	none	ACTCA*TTGCT	A	517684	-19	expected	4	4	yes	yes	yes	4	4	4	4	SRR957844(1;1),SRR957843(3;3),
II	535609	+	none	TAAAG*CAAGT	G	535631	-22	expected	1	1	yes	no	yes	1	1	1	1	SRR957844(1;1),
II	535611	+	none	AAGCA*AGTTT	A	535631	-20	expected	9	8	no	yes	yes	9	8	0	0	SRR957843(6;5),SRR957842(1;1),SRR957844(2;2),
II	535612	+	none	AGCAA*GTTTC	A	535631	-19	expected	2	1	yes	no	yes	2	1	2	1	SRR957843(2;1),
II	535613	+	none	GCAAG*TTTCT	G	535631	-18	expected	8	7	yes	yes	yes	8	7	8	7	SRR957844(2;2),SRR957843(6;5),
II	535617	+	none	GTTTC*TAACT	C	535631	-14	expected	1	1	yes	no	yes	1	1	1	1	SRR957843(1;1),
II	535621	+	none	CTAAC*TGATC	C	535631	-10	proximal	1	1	yes	no	yes	1	1	1	1	SRR957844(1;1),
II	535624	+	none	ACTGA*TCCGT	A	535631	-7	proximal	1	1	yes	no	yes	1	1	1	1	SRR957844(1;1),
II	628384	+	none	GCGCG*ATGGA	G	628537	-153	distal	1	1	yes	no	yes	1	1	1	1	SRR957844(1;1),
II	677067	+	none	CTAGA*GCTTT	A	685198	-8131	distal	2	1	yes	no	yes	2	1	2	1	SRR957844(2;1),
II	715963	+	none	ATAAC*TAACA	C	715980	-17	expected	1	1	yes	no	yes	1	1	1	1	SRR957844(1;1),
II	731621	+	none	CTAAC*TATTA	C	731632	-11	expected	1	1	yes	no	yes	1	1	1	1	SRR957844(1;1),
II	735366	+	none	GTTTA*GTAAC	A	735383	-17	expected	1	1	no	no	yes	1	1	0	0	SRR957843(1;1),
II	755132	+	none	CAAGC*TAACA	C	755149	-17	expected	1	1	no	no	yes	1	1	0	0	SRR957844(1;1),
II	848247	+	none	CTAAT*TGCAA	T	848262	-15	expected	1	1	no	no	yes	1	1	0	0	SRR957844(1;1),
II	1052209	+	none	TTTAA*CTAAT	A	1052338	-129	distal	3	3	yes	yes	yes	3	3	1	1	SRR957844(1;1),SRR957843(2;2),
II	1132727	+	none	CTAAC*TAATA	C	1132740	-13	expected	1	1	yes	no	yes	1	1	1	1	SRR957843(1;1),
II	1168046	+	none	TCTAT*TAACA	T	1168061	-15	expected	1	1	no	no	yes	1	1	0	0	SRR957843(1;1),
II	1334594	+	none	ATAGC*TAACT	C	1334606	-12	expected	1	1	no	no	yes	1	1	0	0	SRR957844(1;1),
II	1334598	+	none	CTAAC*TTGTA	C	1334606	-8	proximal	2	2	no	no	yes	2	2	0	0	SRR957843(2;2),
II	1445454	+	none	AAGGC*TAACT	C	1445473	-19	expected	8	7	yes	yes	yes	8	7	1	1	SRR957843(6;5),SRR957844(2;2),
II	1501048	+	none	GACTG*ACGGT	G	1501087	-39	expected	1	1	no	no	yes	1	1	0	0	SRR957844(1;1),
II	1501076	+	none	GTCGC*TAACC	C	1501087	-11	expected	2	2	no	no	yes	2	2	0	0	SRR957843(2;2),
II	1510864	+	none	ATCTA*ACTGC	A	1510880	-16	expected	1	1	no	no	yes	1	1	0	0	SRR957843(1;1),
II	1510865	+	none	TCTAA*CTGCC	A	1510880	-15	expected	2	2	yes	yes	yes	2	2	2	2	SRR957844(1;1),SRR957843(1;1),
II	1524136	+	none	GTTAA*CTAAT	A	1524156	-20	expected	5	5	yes	yes	yes	5	5	4	4	SRR957844(2;2),SRR957843(3;3),
II	1547302	+	none	CATCT*AACTA	T	1547319	-17	expected	23	21	yes	yes	yes	23	21	15	13	SRR957843(14;12),SRR957844(9;9),
II	1547303	+	none	ATCTA*ACTAA	A	1547319	-16	expected	15	13	yes	yes	yes	15	13	8	7	SRR957844(5;5),SRR957843(10;8),
II	1547304	+	none	TCTAA*CTAAT	A	1547319	-15	expected	279	98	yes	yes	yes	279	98	260	82	SRR957844(87;39),SRR957843(191;58),SRR957842(1;1),
II	1589562	+	none	TATCT*AACAA	T	1589580	-18	expected	1	1	yes	no	yes	1	1	1	1	SRR957844(1;1),
II	1589564	+	none	TCTAA*CAAAT	A	1589580	-16	expected	4	4	yes	yes	yes	4	4	4	4	SRR957843(2;2),SRR957844(2;2),
II	1591641	+	none	ATAGC*TAACA	C	1591654	-13	expected	2	1	no	no	yes	2	1	0	0	SRR957844(2;1),
II	1690473	+	none	ACTGA*CTAAT	A	1690487	-14	expected	2	1	yes	no	yes	2	1	2	1	SRR957844(2;1),
II	1707753	+	none	TTTAC*TAACC	C	1707763	-10	proximal	1	1	no	no	yes	1	1	0	0	SRR957844(1;1),
II	1770187	+	none	GAAGT*GAAGG	T	1770237	-50	expected	1	1	yes	no	yes	1	1	1	1	SRR957844(1;1),
II	1770205	+	none	AGTAA*ACATT	A	1770237	-32	expected	1	1	no	no	yes	1	1	0	0	SRR957843(1;1),
II	1770218	+	none	ACTTA*GACTA	A	1770237	-19	expected	4	3	yes	yes	yes	4	3	4	3	SRR957844(1;1),SRR957843(3;2),
II	1770221	+	none	TAGAC*TAACT	C	1770237	-16	expected	2	2	no	yes	yes	2	2	0	0	SRR957844(1;1),SRR957843(1;1),
II	1794454	+	none	TTGTT*TCTTT	T	1794492	-38	expected	2	1	no	no	yes	2	1	0	0	SRR957844(2;1),
II	1831594	+	none	ATTTT*TCGTT	T	1831627	-33	expected	1	1	no	no	yes	1	1	0	0	SRR957843(1;1),
II	1839830	+	none	ATTTA*CTAAC	A	1839846	-16	expected	2	2	yes	no	yes	2	2	2	2	SRR957843(2;2),
II	1840028	+	none	CTAAT*TAAGA	T	1840044	-16	expected	2	1	no	no	yes	2	1	0	0	SRR957843(2;1),
II	2073457	+	none	TTAAC*GGGGT	C	2073466	-9	proximal	1	1	yes	no	yes	1	1	1	1	SRR957843(1;1),
II	2073459	+	none	AACGG*GGTTT	G	2073466	-7	proximal	1	1	no	no	yes	1	1	0	0	SRR957843(1;1),
II	2181064	+	none	TCAGC*TAACG	C	2181080	-16	expected	1	1	no	no	yes	1	1	0	0	SRR957843(1;1),
II	2210798	+	none	TTGAC*TAACG	C	2210811	-13	expected	1	1	yes	no	yes	1	1	1	1	SRR957843(1;1),
II	2239347	+	none	CTAAT*GTATA	T	2239361	-14	expected	1	1	no	no	yes	1	1	0	0	SRR957844(1;1),
II	2240428	+	none	TAACT*GACAA	T	2240436	-8	proximal	9	6	no	yes	yes	9	6	0	0	SRR957843(6;3),SRR957844(3;3),
II	2240430	+	none	ACTGA*CAACA	A	2240436	-6	proximal	12	7	yes	yes	yes	12	7	11	6	SRR957843(7;5),SRR957844(5;2),
II	2274600	+	none	AACTA*TCCCT	A	2274609	-9	proximal	1	1	yes	no	yes	1	1	1	1	SRR957844(1;1),
II	2287405	+	none	TACCA*GCATT	A	2287449	-44	expected	1	1	yes	no	yes	1	1	1	1	SRR957843(1;1),
II	2291880	+	none	CTAAT*TAAAT	T	2291889	-9	proximal	1	1	no	no	yes	1	1	0	0	SRR957843(1;1),
II	2295460	+	none	GCTTA*TCATG	A	2296423	-963	distal	1	1	yes	no	yes	1	1	1	1	SRR957843(1;1),
II	2307919	+	none	ATCTA*ACTTG	A	2307930	-11	expected	2	1	no	no	yes	2	1	0	0	SRR957844(2;1),
II	2307920	+	none	TCTAA*CTTGT	A	2307930	-10	proximal	1	1	yes	no	yes	1	1	1	1	SRR957843(1;1),
II	2325225	+	none	TAATA*CTTAT	A	2325233	-8	proximal	1	1	yes	no	yes	1	1	1	1	SRR957843(1;1),
II	2507103	+	none	GAAGC*TAACT	C	2507116	-13	expected	2	2	no	yes	yes	2	2	0	0	SRR957843(1;1),SRR957844(1;1),
II	2691052	+	none	AAAGA*TAAAG	A	2691196	-144	distal	1	1	no	no	yes	1	1	0	0	SRR957844(1;1),
II	2691053	+	none	AAGAT*AAAGT	T	2691196	-143	distal	3	2	no	yes	yes	3	2	0	0	SRR957843(1;1),SRR957844(2;1),
II	2874532	+	none	TCTGA*CAGCT	A	2874540	-8	proximal	40	28	yes	yes	yes	40	28	38	27	SRR957843(20;15),SRR957844(20;13),
II	2921432	+	none	CTAAC*TAATT	C	2921440	-8	proximal	1	1	no	no	yes	1	1	0	0	SRR957843(1;1),
II	2921435	+	none	ACTAA*TTAAG	A	2921440	-5	proximal	16	7	yes	yes	yes	16	7	15	6	SRR957843(14;5),SRR957844(2;2),
II	2935417	+	none	CTTGC*TAACA	C	2935430	-13	expected	1	1	no	no	yes	1	1	0	0	SRR957843(1;1),
II	3056370	+	none	CTTAC*CAATT	C	3057122	-752	distal	2	1	yes	no	yes	2	1	2	1	SRR957844(2;1),
II	3118205	+	none	TATCT*AACGA	T	3118218	-13	expected	4	3	no	yes	yes	4	3	0	0	SRR957843(3;2),SRR957844(1;1),
II	3186865	+	none	ATCTA*ACTAC	A	3186875	-10	proximal	1	1	no	no	yes	1	1	0	0	SRR957844(1;1),
II	3186866	+	none	TCTAA*CTACT	A	3186875	-9	proximal	10	9	yes	yes	yes	10	9	9	8	SRR957843(4;4),SRR957844(6;5),
II	3344787	+	none	TCTGA*TGTAT	A	3344832	-45	expected	1	1	yes	no	yes	1	1	1	1	SRR957843(1;1),
II	3430569	+	none	AAGGC*TAACG	C	3430580	-11	expected	1	1	no	no	yes	1	1	0	0	SRR957843(1;1),
II	3522993	+	none	CTGAT*AGATA	T	3523001	-8	proximal	2	2	no	yes	yes	2	2	0	0	SRR957844(1;1),SRR957843(1;1),
II	3522996	+	none	ATAGA*TATAG	A	3523001	-5	proximal	1	1	yes	no	yes	1	1	1	1	SRR957843(1;1),
II	3524866	+	none	AACTA*AATGG	A	3524874	-8	proximal	1	1	no	no	yes	1	1	0	0	SRR957843(1;1),
II	3524867	+	none	ACTAA*ATGGT	A	3524874	-7	proximal	7	7	yes	yes	yes	7	7	5	5	SRR957844(1;1),SRR957843(6;6),
II	3524868	+	none	CTAAA*TGGTA	A	3524874	-6	proximal	1	1	yes	no	yes	1	1	1	1	SRR957843(1;1),
II	3630160	+	none	CGTCT*AATCT	T	3630171	-11	expected	2	2	yes	yes	yes	2	2	1	1	SRR957844(1;1),SRR957843(1;1),
II	3709743	+	none	CTAAA*TAATT	A	3709755	-12	expected	1	1	yes	no	yes	1	1	1	1	SRR957843(1;1),
II	3818473	+	none	GTAGA*TTATA	A	3818529	-56	expected	1	1	yes	no	yes	1	1	1	1	SRR957844(1;1),
II	3818513	+	none	ACTTA*CTAAT	A	3818529	-16	expected	2	1	yes	no	yes	2	1	2	1	SRR957843(2;1),
II	4005735	+	none	GCTCC*ATGGT	C	4005803	-68	distal	2	2	no	yes	yes	2	2	0	0	SRR957844(1;1),SRR957843(1;1),
II	4073864	+	none	CTAAT*ATAAA	T	4073870	-6	proximal	1	1	no	no	yes	1	1	0	0	SRR957844(1;1),
II	4074227	+	none	CTAAC*TAAGG	C	4074237	-10	proximal	4	3	yes	yes	yes	4	3	2	2	SRR957844(3;2),SRR957843(1;1),
II	4092528	+	none	ATTAA*CCCAA	A	4092539	-11	expected	88	45	yes	yes	yes	88	45	88	45	SRR957843(45;23),SRR957844(43;22),
II	4282633	+	none	AATTA*ACTAT	A	4282641	-8	proximal	1	1	no	no	yes	1	1	0	0	SRR957843(1;1),
II	4360960	+	none	TGTAA*CTAAT	A	4360974	-14	expected	1	1	yes	no	yes	1	1	1	1	SRR957844(1;1),
III	89150	-	none	TTTGC*TAACT	C	89136	-14	expected	1	1	no	no	yes	1	1	0	0	SRR957843(1;1),
III	389230	-	none	GCTTA*CTAAC	A	389218	-12	expected	4	4	yes	yes	yes	4	4	4	4	SRR957843(3;3),SRR957844(1;1),
III	389231	-	none	AGCTT*ACTAA	T	389218	-13	expected	1	1	no	no	yes	1	1	0	0	SRR957843(1;1),
III	416842	-	none	TGATA*GTAAA	A	416779	-63	distal	56	15	no	yes	yes	56	15	0	0	SRR957844(18;4),SRR957843(38;11),
[truncated: 88 more rows]
