# Supplementary material for: TechCrunch Interview With Mark Zuckerberg On $100 Million Education Donation
Source: HighWire-hosted journal article supplement (doi:10.1101/gr.202820.115), 2010-01-01
Supplement: Supplemental_Table_S5.xlsx [file Supplemental_Table_S5.xlsx]

## Sheet: BP_table_human_all_metric.txt
chrom	BP	strand	Fit U2-premRNA interaction motif?	Is BP an 'A'?	In expected position (10-60nt upstream of 3'ss)?	More than one validating read?	Discovered in more than one RNAseq source?	At least one read has mutation?	Discovered in unbiased RNAseq source?	Overall Quality Score	Example - BPs that fit a U2-premRNA motif, are in expected position, and are found in multiple RNAseq sources
chr1	880204	-	0	1	1	0	0	1	0	APM	FALSE
chr1	880552	-	0	1	1	1	1	1	0	APRSM	FALSE
chr1	880556	-	0	1	1	0	0	0	1	APB	FALSE
chr1	881941	-	1	1	1	1	1	1	1	UAPRSMB	TRUE
chr1	881949	-	0	1	1	1	1	1	1	APRSMB	FALSE
chr1	884000	-	1	1	1	0	0	0	1	UAPB	FALSE
chr1	887538	-	1	1	1	1	1	1	1	UAPRSMB	TRUE
chr1	887943	-	0	1	0	0	0	1	1	AMB	FALSE
chr1	888013	-	0	1	1	0	0	1	0	APM	FALSE
chr1	888685	-	0	1	1	1	1	1	1	APRSMB	FALSE
chr1	888691	-	0	0	1	1	1	0	1	PRSB	FALSE
chr1	888694	-	0	0	1	0	0	0	1	PB	FALSE
chr1	891621	-	0	1	1	1	1	1	1	APRSMB	FALSE
chr1	891623	-	0	0	1	0	0	0	0	P	FALSE
chr1	892676	-	0	0	1	1	0	0	1	PRB	FALSE
chr1	892753	-	0	1	0	0	0	0	1	AB	FALSE
chr1	1018393	-	1	1	1	1	1	1	1	UAPRSMB	TRUE
chr1	1019488	-	0	0	1	0	0	0	0	P	FALSE
chr1	1019496	-	0	0	1	0	0	0	1	PB	FALSE
chr1	1019501	-	0	1	1	1	0	1	0	APRM	FALSE
chr1	1019908	-	1	1	1	0	0	1	0	UAPM	FALSE
chr1	1022603	-	0	1	1	0	0	0	0	AP	FALSE
chr1	1022606	-	0	0	1	1	1	0	1	PRSB	FALSE
chr1	1022608	-	0	0	1	0	0	0	1	PB	FALSE
chr1	1022609	-	0	0	1	1	1	0	1	PRSB	FALSE
chr1	1153090	-	1	1	1	1	0	0	1	UAPRB	FALSE
chr1	1153215	-	1	1	1	0	0	1	1	UAPMB	FALSE
chr1	1153396	-	0	1	0	0	0	0	1	AB	FALSE
chr1	1154326	-	1	1	0	1	1	0	1	UARSB	FALSE
chr1	1190895	-	0	1	1	0	0	1	0	APM	FALSE
chr1	1191003	-	0	0	0	0	0	0	1	B	FALSE
chr1	1198784	-	1	1	1	0	0	0	0	UAP	FALSE
chr1	1203394	-	0	1	1	0	0	0	1	APB	FALSE
chr1	1232032	-	0	1	1	1	1	1	1	APRSMB	FALSE
chr1	1233509	-	0	1	1	0	0	1	0	APM	FALSE
chr1	1234115	-	0	0	1	0	0	0	1	PB	FALSE
chr1	1236103	-	1	1	1	0	0	1	0	UAPM	FALSE
chr1	1237449	-	0	1	1	0	0	1	0	APM	FALSE
chr1	1238682	-	1	1	1	1	1	1	1	UAPRSMB	TRUE
chr1	1239553	-	1	0	1	0	0	0	1	UPB	FALSE
chr1	1247616	-	1	0	0	0	0	0	1	UB	FALSE
chr1	1248522	-	1	0	1	1	1	1	1	UPRSMB	TRUE
chr1	1248527	-	0	0	1	0	0	0	1	PB	FALSE
chr1	1249319	-	1	0	1	0	0	1	1	UPMB	FALSE
chr1	1249320	-	1	1	1	1	0	0	0	UAPR	FALSE
chr1	1249766	-	1	0	1	0	0	0	0	UP	FALSE
chr1	1250364	-	1	1	1	1	1	1	1	UAPRSMB	TRUE
chr1	1254924	-	1	1	1	1	0	1	1	UAPRMB	FALSE
chr1	1255927	-	0	1	1	0	0	1	0	APM	FALSE
chr1	1255930	-	0	0	1	0	0	1	1	PMB	FALSE
chr1	1255931	-	0	0	1	0	0	0	0	P	FALSE
chr1	1255933	-	1	0	1	1	1	1	1	UPRSMB	TRUE
chr1	1274056	-	0	1	1	1	1	1	1	APRSMB	FALSE
chr1	1274057	-	0	1	1	0	0	1	1	APMB	FALSE
chr1	1274815	-	1	1	0	0	0	1	1	UAMB	FALSE
chr1	1274818	-	0	0	0	0	0	1	1	MB	FALSE
chr1	1274819	-	0	0	0	1	0	0	1	RB	FALSE
chr1	1274822	-	0	0	0	1	0	0	1	RB	FALSE
chr1	1274823	-	0	0	0	0	0	0	0		FALSE
chr1	1275897	-	1	1	1	1	1	1	1	UAPRSMB	TRUE
chr1	1275900	-	0	0	1	0	0	0	1	PB	FALSE
chr1	1275904	-	1	1	1	1	1	0	1	UAPRSB	TRUE
chr1	1275908	-	0	0	1	0	0	0	1	PB	FALSE
chr1	1276306	-	0	0	0	0	0	0	1	B	FALSE
chr1	1276655	-	0	1	0	0	0	0	1	AB	FALSE
chr1	1277209	-	0	1	1	1	0	0	1	APRB	FALSE
chr1	1277211	-	1	0	1	0	0	1	0	UPM	FALSE
chr1	1289026	-	0	0	1	0	0	0	1	PB	FALSE
chr1	1289034	-	0	1	1	1	0	0	1	APRB	FALSE
chr1	1309650	-	0	0	0	0	0	0	1	B	FALSE
chr1	1309846	-	0	0	1	1	0	0	0	PR	FALSE
chr1	1309848	-	1	1	1	1	0	1	0	UAPRM	FALSE
chr1	1322992	-	1	1	1	0	0	0	1	UAPB	FALSE
chr1	1323490	-	0	0	1	0	0	0	1	PB	FALSE
chr1	1325964	-	0	1	1	0	0	1	0	APM	FALSE
chr1	1325965	-	0	0	1	0	0	1	1	PMB	FALSE
chr1	1325966	-	0	0	1	0	0	0	1	PB	FALSE
chr1	1326269	-	1	1	1	1	1	1	1	UAPRSMB	TRUE
chr1	1326972	-	0	1	0	0	0	1	1	AMB	FALSE
chr1	1326977	-	1	1	0	0	0	0	1	UAB	FALSE
chr1	1327975	-	1	0	0	0	0	0	1	UB	FALSE
chr1	1328213	-	1	1	1	0	0	1	0	UAPM	FALSE
chr1	1328310	-	0	0	0	0	0	0	1	B	FALSE
chr1	1328843	-	0	0	0	1	0	0	1	RB	FALSE
chr1	1333752	-	0	1	1	0	0	1	0	APM	FALSE
chr1	1477567	-	0	1	1	0	0	1	1	APMB	FALSE
chr1	1479393	-	0	1	1	1	1	1	1	APRSMB	FALSE
chr1	1572185	-	0	0	1	0	0	0	1	PB	FALSE
chr1	1572588	-	0	1	1	0	0	1	0	APM	FALSE
chr1	1599938	-	0	1	1	0	0	1	1	APMB	FALSE
chr1	1601198	-	0	0	1	0	0	0	1	PB	FALSE
chr1	1601243	-	0	0	0	0	0	0	1	B	FALSE
chr1	1601616	-	1	1	1	1	1	1	1	UAPRSMB	TRUE
chr1	1635400	-	1	1	1	0	0	0	1	UAPB	FALSE
chr1	1635783	-	0	0	0	0	0	0	1	B	FALSE
chr1	1647935	-	1	1	1	0	0	0	1	UAPB	FALSE
chr1	1669278	-	0	0	0	0	0	0	0		FALSE
chr1	1684506	-	0	0	0	0	0	0	1	B	FALSE
chr1	1685111	-	0	0	1	0	0	0	0	P	FALSE
chr1	1685112	-	0	1	1	1	1	1	1	APRSMB	FALSE
chr1	1685113	-	0	0	1	1	1	0	1	PRSB	FALSE
chr1	1685124	-	0	1	1	1	0	1	0	APRM	FALSE
chr1	1685847	-	0	1	1	1	1	1	0	APRSM	FALSE
chr1	1686164	-	1	1	1	1	1	1	1	UAPRSMB	TRUE
chr1	1686170	-	0	0	1	0	0	0	1	PB	FALSE
chr1	1686173	-	0	0	1	0	0	0	1	PB	FALSE
chr1	1687214	-	0	0	0	0	0	0	1	B	FALSE
chr1	1687816	-	1	1	1	0	0	0	1	UAPB	FALSE
chr1	1718519	-	1	1	1	1	1	1	1	UAPRSMB	TRUE
chr1	1718526	-	1	0	1	0	0	0	1	UPB	FALSE
chr1	1718529	-	1	0	1	0	0	0	1	UPB	FALSE
chr1	1718898	-	1	1	1	1	1	1	1	UAPRSMB	TRUE
chr1	1736042	-	0	1	1	1	1	1	1	APRSMB	FALSE
chr1	1736059	-	1	1	1	0	0	1	1	UAPMB	FALSE
chr1	1738004	-	1	1	1	1	1	1	1	UAPRSMB	TRUE
chr1	1747317	-	0	1	1	1	0	0	1	APRB	FALSE
chr1	1749338	-	1	1	1	1	1	1	1	UAPRSMB	TRUE
chr1	2289062	-	0	0	1	0	0	1	0	PM	FALSE
chr1	2319003	-	1	1	1	0	0	0	1	UAPB	FALSE
chr1	2337295	-	1	0	1	1	1	1	1	UPRSMB	TRUE
chr1	2338360	-	1	1	1	0	0	0	1	UAPB	FALSE
chr1	2341908	-	1	1	1	0	0	1	1	UAPMB	FALSE
chr1	2440520	-	0	1	1	1	1	1	0	APRSM	FALSE
chr1	2442247	-	0	1	1	0	0	1	1	APMB	FALSE
chr1	2447187	-	1	1	1	1	1	1	1	UAPRSMB	TRUE
chr1	2450057	-	0	1	1	0	0	1	0	APM	FALSE
chr1	2450787	-	1	1	1	0	0	0	1	UAPB	FALSE
chr1	2452368	-	0	1	1	0	0	1	1	APMB	FALSE
chr1	2452772	-	0	0	1	1	1	0	1	PRSB	FALSE
chr1	2452773	-	0	0	1	0	0	0	1	PB	FALSE
chr1	2452774	-	0	0	1	0	0	0	1	PB	FALSE
chr1	2452775	-	1	0	1	1	1	0	1	UPRSB	TRUE
chr1	2452779	-	0	0	1	1	0	0	1	PRB	FALSE
chr1	2452783	-	0	1	1	0	0	0	1	APB	FALSE
chr1	2452785	-	0	1	1	1	1	1	1	APRSMB	FALSE
chr1	2452786	-	0	0	1	0	0	0	0	P	FALSE
chr1	2452787	-	0	1	1	1	1	1	1	APRSMB	FALSE
chr1	3411326	-	0	1	1	1	1	1	1	APRSMB	FALSE
chr1	3412603	-	0	1	1	1	0	1	1	APRMB	FALSE
chr1	3413943	-	0	1	1	1	1	1	1	APRSMB	FALSE
chr1	3416633	-	0	1	0	0	0	0	1	AB	FALSE
chr1	3424514	-	1	0	1	0	0	0	1	UPB	FALSE
chr1	3425279	-	0	1	1	0	0	0	1	APB	FALSE
chr1	3547702	-	0	0	1	0	0	1	1	PMB	FALSE
chr1	3548911	-	1	0	0	0	0	0	1	UB	FALSE
chr1	3551878	-	1	1	1	0	0	0	1	UAPB	FALSE
chr1	3563386	-	1	1	1	1	1	1	1	UAPRSMB	TRUE
chr1	3655791	-	0	0	0	0	0	0	0		FALSE
chr1	3656327	-	0	0	0	0	0	0	0		FALSE
chr1	3656363	-	0	0	0	0	0	0	0		FALSE
chr1	3659268	-	0	1	0	0	0	1	1	AMB	FALSE
chr1	3700704	-	0	0	1	0	0	0	1	PB	FALSE
chr1	3701787	-	1	1	1	0	0	0	1	UAPB	FALSE
chr1	3701830	-	0	0	0	0	0	0	1	B	FALSE
chr1	3732960	-	1	1	1	0	0	1	1	UAPMB	FALSE
chr1	3750627	-	1	0	1	0	0	0	1	UPB	FALSE
chr1	3753289	-	0	0	1	1	1	0	0	PRS	FALSE
chr1	3753290	-	0	0	1	0	0	0	1	PB	FALSE
chr1	3753292	-	0	0	1	0	0	0	1	PB	FALSE
chr1	3754110	-	1	1	1	0	0	1	1	UAPMB	FALSE
chr1	3754263	-	0	0	0	1	1	0	1	RSB	FALSE
chr1	3755692	-	1	0	0	0	0	0	1	UB	FALSE
chr1	3806661	-	1	1	1	0	0	0	0	UAP	FALSE
chr1	3807636	-	1	1	1	0	0	1	1	UAPMB	FALSE
chr1	5924120	-	0	1	1	1	1	1	1	APRSMB	FALSE
chr1	5924121	-	0	0	1	1	0	0	0	PR	FALSE
chr1	5924122	-	0	0	1	0	0	1	1	PMB	FALSE
chr1	5927192	-	1	1	1	1	1	1	1	UAPRSMB	TRUE
chr1	5927204	-	0	1	1	0	0	1	1	APMB	FALSE
chr1	5927467	-	0	0	0	0	0	0	1	B	FALSE
chr1	5933426	-	0	0	1	0	0	0	1	PB	FALSE
chr1	5933427	-	0	0	1	0	0	0	1	PB	FALSE
chr1	6253114	-	0	0	0	0	0	0	1	B	FALSE
chr1	6293703	-	0	0	0	0	0	0	1	B	FALSE
chr1	6294601	-	1	1	1	0	0	1	0	UAPM	FALSE
chr1	6522750	-	1	1	1	0	0	1	0	UAPM	FALSE
chr1	6525638	-	0	1	1	0	0	1	0	APM	FALSE
chr1	6529778	-	1	1	1	1	1	1	1	UAPRSMB	TRUE
chr1	6529809	-	0	0	0	0	0	0	1	B	FALSE
chr1	6530431	-	0	1	1	1	1	1	1	APRSMB	FALSE
chr1	6530437	-	0	1	1	0	0	0	1	APB	FALSE
chr1	6531889	-	0	1	1	0	0	0	1	APB	FALSE
chr1	6534250	-	1	1	1	0	0	0	0	UAP	FALSE
chr1	6535601	-	1	0	1	1	1	0	1	UPRSB	TRUE
chr1	6586088	-	0	1	1	1	0	1	0	APRM	FALSE
chr1	6586090	-	1	0	1	0	0	0	0	UP	FALSE
chr1	6586136	-	0	0	0	1	1	0	1	RSB	FALSE
chr1	6589249	-	0	1	1	1	1	0	1	APRSB	FALSE
chr1	6592846	-	1	1	1	1	1	1	1	UAPRSMB	TRUE
chr1	6593528	-	1	1	1	1	0	1	0	UAPRM	FALSE
chr1	6602028	-	0	1	1	0	0	1	1	APMB	FALSE
chr1	6602037	-	1	1	1	0	0	0	1	UAPB	FALSE
chr1	6605013	-	1	1	1	0	0	1	1	UAPMB	FALSE
chr1	6605267	-	1	1	1	0	0	0	0	UAP	FALSE
chr1	6609470	-	0	0	0	0	0	0	1	B	FALSE
chr1	6609758	-	0	0	0	1	1	0	1	RSB	FALSE
chr1	6653734	-	0	1	1	0	0	1	0	APM	FALSE
chr1	6696329	-	1	1	1	0	0	0	1	UAPB	FALSE
chr1	6697565	-	0	1	0	0	0	0	1	AB	FALSE
chr1	6697589	-	1	1	1	1	1	1	1	UAPRSMB	TRUE
chr1	6697635	-	1	0	0	1	0	0	1	URB	FALSE
chr1	6704729	-	0	0	0	0	0	0	1	B	FALSE
chr1	6705204	-	0	0	1	0	0	1	0	PM	FALSE
chr1	6705207	-	0	0	1	1	1	1	1	PRSMB	FALSE
chr1	6705210	-	0	1	1	1	0	1	0	APRM	FALSE
chr1	6705214	-	0	1	1	1	1	1	1	APRSMB	FALSE
chr1	6705217	-	0	0	1	1	1	1	1	PRSMB	FALSE
chr1	6705218	-	0	1	1	0	0	1	1	APMB	FALSE
chr1	6706030	-	1	1	0	1	1	1	1	UARSMB	FALSE
chr1	6706070	-	1	0	1	1	1	1	1	UPRSMB	TRUE
chr1	6706099	-	0	1	0	0	0	0	1	AB	FALSE
chr1	6706601	-	0	0	0	0	0	0	0		FALSE
chr1	6714132	-	1	0	1	0	0	0	1	UPB	FALSE
chr1	8074475	-	1	1	1	1	1	1	1	UAPRSMB	TRUE
chr1	8074569	-	0	1	0	0	0	0	1	AB	FALSE
chr1	8074774	-	0	0	0	0	0	0	1	B	FALSE
chr1	8074787	-	0	1	0	1	1	1	1	ARSMB	FALSE
chr1	8075444	-	0	0	0	1	1	0	1	RSB	FALSE
chr1	8415684	-	0	1	1	0	0	1	1	APMB	FALSE
chr1	8416325	-	0	0	1	0	0	0	1	PB	FALSE
chr1	8416330	-	0	1	1	1	1	1	1	APRSMB	FALSE
chr1	8418997	-	0	1	1	0	0	1	1	APMB	FALSE
chr1	8421574	-	0	0	1	1	1	1	1	PRSMB	FALSE
chr1	8421577	-	0	0	1	1	1	0	1	PRSB	FALSE
chr1	8421578	-	0	1	1	0	0	1	1	APMB	FALSE
chr1	8421957	-	1	0	1	1	1	1	1	UPRSMB	TRUE
chr1	8421960	-	0	0	1	0	0	0	1	PB	FALSE
chr1	8421964	-	1	1	1	1	1	1	1	UAPRSMB	TRUE
chr1	8422928	-	0	1	1	0	0	0	0	AP	FALSE
chr1	8424937	-	1	0	1	0	0	0	1	UPB	FALSE
chr1	8876907	-	0	0	0	0	0	0	1	B	FALSE
chr1	8921533	-	1	1	1	1	1	1	1	UAPRSMB	TRUE
chr1	8921542	-	0	0	1	0	0	0	1	PB	FALSE
chr1	8923025	-	0	1	1	0	0	0	0	AP	FALSE
chr1	8923026	-	0	1	1	1	1	1	1	APRSMB	FALSE
chr1	8923030	-	0	1	1	1	1	1	1	APRSMB	FALSE
chr1	8923033	-	0	0	1	1	1	0	1	PRSB	FALSE
chr1	8923402	-	0	0	0	1	1	1	1	RSMB	FALSE
chr1	8923425	-	1	0	1	1	1	1	0	UPRSM	TRUE
chr1	8923431	-	0	1	1	0	0	1	0	APM	FALSE
chr1	8924176	-	1	1	1	0	0	1	0	UAPM	FALSE
chr1	8925577	-	1	0	1	1	1	1	1	UPRSMB	TRUE
chr1	8926584	-	1	0	1	1	1	1	1	UPRSMB	TRUE
chr1	8926587	-	1	0	1	0	0	0	1	UPB	FALSE
chr1	8926718	-	0	0	0	0	0	0	1	B	FALSE
chr1	8927332	-	0	0	1	0	0	0	0	P	FALSE
chr1	8927335	-	0	1	1	1	1	1	1	APRSMB	FALSE
chr1	8927337	-	0	0	1	1	1	1	1	PRSMB	FALSE
chr1	8927355	-	0	0	1	1	1	0	1	PRSB	FALSE
chr1	8927419	-	0	0	0	0	0	0	1	B	FALSE
chr1	8927480	-	0	0	0	0	0	0	1	B	FALSE
chr1	8928136	-	0	1	1	0	0	1	0	APM	FALSE
chr1	8930569	-	0	0	0	1	1	0	1	RSB	FALSE
chr1	8930587	-	1	1	1	0	0	1	0	UAPM	FALSE
chr1	8931090	-	0	1	0	0	0	0	1	AB	FALSE
chr1	8931673	-	0	0	0	0	0	0	1	B	FALSE
chr1	8932046	-	0	1	0	0	0	0	1	AB	FALSE
chr1	8932065	-	1	1	1	0	0	1	1	UAPMB	FALSE
chr1	8934697	-	1	0	0	0	0	1	0	UM	FALSE
chr1	9791467	-	0	0	1	0	0	1	0	PM	FALSE
chr1	9791468	-	0	0	1	0	0	0	1	PB	FALSE
chr1	9791472	-	0	1	1	0	0	1	0	APM	FALSE
chr1	9791473	-	0	0	1	1	1	1	1	PRSMB	FALSE
chr1	9791475	-	0	0	1	1	1	0	1	PRSB	FALSE
chr1	9791477	-	1	0	1	1	1	1	1	UPRSMB	TRUE
chr1	9791495	-	1	0	1	0	0	0	1	UPB	FALSE
chr1	9793640	-	0	1	1	0	0	0	0	AP	FALSE
chr1	9795250	-	0	0	1	0	0	0	0	P	FALSE
chr1	9795256	-	1	1	1	0	0	1	0	UAPM	FALSE
chr1	9795700	-	0	0	1	1	1	1	1	PRSMB	FALSE
chr1	9795701	-	0	0	1	0	0	0	0	P	FALSE
chr1	9795703	-	1	0	1	1	1	1	1	UPRSMB	TRUE
chr1	9795709	-	1	0	1	1	0	0	0	UPR	FALSE
chr1	9801337	-	0	0	1	0	0	0	0	P	FALSE
chr1	9804021	-	0	0	0	1	1	0	1	RSB	FALSE
chr1	9804022	-	0	0	0	1	1	0	1	RSB	FALSE
chr1	9804081	-	1	1	1	1	1	1	1	UAPRSMB	TRUE
chr1	9804085	-	0	1	1	0	0	1	0	APM	FALSE
chr1	9809994	-	1	1	1	0	0	1	0	UAPM	FALSE
chr1	9931293	-	0	0	0	0	0	0	0		FALSE
chr1	9943816	-	1	0	1	0	0	0	1	UPB	FALSE
chr1	9992983	-	1	1	1	1	1	0	1	UAPRSB	TRUE
chr1	9996584	-	0	0	0	1	1	0	1	RSB	FALSE
chr1	10002871	-	1	1	1	0	0	0	1	UAPB	FALSE
chr1	10703082	-	0	0	1	1	1	0	1	PRSB	FALSE
chr1	10708218	-	0	1	1	0	0	0	1	APB	FALSE
chr1	10714669	-	1	1	1	0	0	1	1	UAPMB	FALSE
chr1	10714764	-	0	0	0	0	0	0	1	B	FALSE
chr1	11116176	-	1	1	1	0	0	1	1	UAPMB	FALSE
chr1	11116179	-	1	0	1	0	0	0	1	UPB	FALSE
chr1	11116842	-	0	0	1	1	1	0	1	PRSB	FALSE
chr1	11119416	-	1	0	1	0	0	0	0	UP	FALSE
chr1	11128141	-	0	0	0	0	0	0	0		FALSE
chr1	11128914	-	0	0	0	0	0	0	1	B	FALSE
chr1	11129830	-	0	1	1	0	0	1	1	APMB	FALSE
chr1	11134087	-	0	1	1	1	1	1	1	APRSMB	FALSE
chr1	11134406	-	1	1	1	0	0	1	0	UAPM	FALSE
chr1	11137029	-	1	1	1	0	0	0	0	UAP	FALSE
chr1	11139913	-	1	1	1	0	0	0	1	UAPB	FALSE
chr1	11140680	-	1	1	0	1	0	0	0	UAR	FALSE
chr1	11140684	-	1	0	0	0	0	0	1	UB	FALSE
chr1	11142956	-	1	1	1	1	1	1	1	UAPRSMB	TRUE
chr1	11147984	-	1	1	1	0	0	1	0	UAPM	FALSE
chr1	11150728	-	0	0	0	0	0	1	1	MB	FALSE
chr1	11150737	-	1	0	1	0	0	0	1	UPB	FALSE
chr1	11158240	-	1	1	1	1	0	1	1	UAPRMB	FALSE
chr1	11169435	-	1	0	0	0	0	0	1	UB	FALSE
chr1	11169805	-	1	1	1	0	0	1	1	UAPMB	FALSE
chr1	11174530	-	1	0	1	1	1	1	1	UPRSMB	TRUE
chr1	11174973	-	1	1	1	1	1	0	0	UAPRS	TRUE
chr1	11175525	-	0	0	0	0	0	0	0		FALSE
chr1	11175546	-	1	1	1	0	0	1	1	UAPMB	FALSE
chr1	11181424	-	1	1	0	1	1	0	1	UARSB	FALSE
chr1	11181425	-	0	0	0	1	1	0	1	RSB	FALSE
chr1	11181445	-	1	1	1	1	1	1	1	UAPRSMB	TRUE
chr1	11184690	-	0	0	0	0	0	0	1	B	FALSE
chr1	11184712	-	0	1	1	0	0	0	1	APB	FALSE
chr1	11184794	-	0	0	0	0	0	0	1	B	FALSE
chr1	11186853	-	0	0	0	1	1	0	1	RSB	FALSE
chr1	11186874	-	1	1	1	0	0	0	1	UAPB	FALSE
chr1	11187899	-	1	1	1	1	1	1	1	UAPRSMB	TRUE
chr1	11188210	-	1	1	1	0	0	0	1	UAPB	FALSE
chr1	11189028	-	1	1	1	0	0	1	0	UAPM	FALSE
chr1	11189039	-	1	1	1	1	1	1	0	UAPRSM	TRUE
chr1	11189914	-	1	1	1	0	0	0	0	UAP	FALSE
chr1	11190856	-	1	0	1	1	1	0	1	UPRSB	TRUE
chr1	11190860	-	1	0	1	1	1	0	1	UPRSB	TRUE
chr1	11190864	-	0	1	1	1	1	1	1	APRSMB	FALSE
chr1	11190866	-	0	0	1	1	1	0	1	PRSB	FALSE
chr1	11190870	-	0	1	1	0	0	1	1	APMB	FALSE
chr1	11190873	-	0	0	1	0	0	1	1	PMB	FALSE
chr1	11193279	-	0	1	1	0	0	1	1	APMB	FALSE
chr1	11194552	-	0	0	1	0	0	0	1	PB	FALSE
chr1	11204841	-	1	0	1	0	0	0	1	UPB	FALSE
chr1	11206846	-	0	0	0	0	0	1	1	MB	FALSE
chr1	11206876	-	1	1	1	0	0	1	1	UAPMB	FALSE
chr1	11259478	-	1	1	1	1	1	1	1	UAPRSMB	TRUE
chr1	11264760	-	0	0	0	0	0	0	0		FALSE
chr1	11269532	-	0	1	1	0	0	1	0	APM	FALSE
chr1	11269543	-	0	1	1	0	0	0	1	APB	FALSE
chr1	11269549	-	1	1	1	0	0	1	1	UAPMB	FALSE
chr1	11272549	-	1	1	1	1	1	1	1	UAPRSMB	TRUE
chr1	11291148	-	0	1	1	1	1	1	1	APRSMB	FALSE
chr1	11291207	-	1	1	0	0	0	0	1	UAB	FALSE
chr1	11292607	-	1	0	1	1	1	0	1	UPRSB	TRUE
chr1	11298701	-	1	0	1	1	1	1	1	UPRSMB	TRUE
chr1	11300628	-	0	1	1	0	0	1	0	APM	FALSE
chr1	11314056	-	0	1	1	0	0	0	0	AP	FALSE
chr1	11317221	-	1	0	0	0	0	0	0	U	FALSE
chr1	11317253	-	0	1	1	0	0	0	0	AP	FALSE
chr1	11318668	-	1	1	1	1	1	0	1	UAPRSB	TRUE
chr1	11709315	-	0	0	1	0	0	0	1	PB	FALSE
chr1	11734900	-	1	1	1	1	1	1	1	UAPRSMB	TRUE
chr1	11735810	-	0	0	1	0	0	0	0	P	FALSE
chr1	11735815	-	0	1	1	1	1	1	1	APRSMB	FALSE
chr1	11736222	-	0	1	1	0	0	1	1	APMB	FALSE
chr1	11740695	-	1	0	1	0	0	1	1	UPMB	FALSE
chr1	11851011	-	1	1	1	0	0	1	0	UAPM	FALSE
chr1	11854164	-	0	1	1	0	0	1	1	APMB	FALSE
chr1	11854937	-	1	0	1	0	0	0	1	UPB	FALSE
chr1	11854961	-	0	0	1	0	0	1	1	PMB	FALSE
chr1	11855405	-	0	0	0	1	0	0	0	R	FALSE
chr1	11855407	-	0	0	0	1	0	0	0	R	FALSE
chr1	11856475	-	1	1	1	0	0	0	1	UAPB	FALSE
chr1	11863204	-	1	0	1	1	1	0	1	UPRSB	TRUE
chr1	11863207	-	0	0	1	1	1	0	1	PRSB	FALSE
chr1	11980412	-	1	1	1	0	0	0	1	UAPB	FALSE
chr1	11984834	-	0	0	0	0	0	0	1	B	FALSE
chr1	12632897	-	0	0	1	0	0	0	0	P	FALSE
chr1	12632903	-	0	1	1	1	1	1	0	APRSM	FALSE
chr1	12639002	-	0	1	1	0	0	1	1	APMB	FALSE
chr1	15819558	-	1	1	1	0	0	1	1	UAPMB	FALSE
chr1	15820521	-	0	1	1	0	0	1	1	APMB	FALSE
chr1	15831273	-	1	0	1	1	1	1	1	UPRSMB	TRUE
chr1	15909502	-	1	0	0	0	0	0	1	UB	FALSE
chr1	16268608	-	0	1	0	0	0	0	1	AB	FALSE
chr1	16268937	-	0	1	0	0	0	1	1	AMB	FALSE
chr1	16269255	-	0	1	1	1	1	1	0	APRSM	FALSE
chr1	16269711	-	0	1	1	1	0	1	0	APRM	FALSE
chr1	16269712	-	0	0	1	1	0	1	1	PRMB	FALSE
chr1	16270229	-	0	0	1	0	0	0	1	PB	FALSE
chr1	16270409	-	0	0	1	0	0	0	0	P	FALSE
chr1	16271718	-	0	1	1	0	0	1	1	APMB	FALSE
chr1	16272359	-	0	1	1	1	1	1	1	APRSMB	FALSE
chr1	16272360	-	0	0	1	1	0	0	1	PRB	FALSE
chr1	16273637	-	0	1	1	0	0	1	0	APM	FALSE
chr1	16343742	-	0	1	1	0	0	1	0	APM	FALSE
chr1	16458386	-	1	1	1	0	0	0	0	UAP	FALSE
chr1	16459887	-	0	0	1	0	0	0	1	PB	FALSE
chr1	16460101	-	0	0	0	0	0	0	1	B	FALSE
chr1	16460121	-	1	0	1	1	1	1	1	UPRSMB	TRUE
chr1	16460133	-	1	1	1	1	0	0	0	UAPR	FALSE
chr1	16461083	-	0	1	1	1	0	0	0	APR	FALSE
chr1	16461713	-	1	0	1	0	0	1	0	UPM	FALSE
chr1	16461717	-	0	1	1	0	0	1	0	APM	FALSE
chr1	16464680	-	0	0	0	1	0	0	1	RB	FALSE
chr1	16477482	-	1	1	1	0	0	1	0	UAPM	FALSE
chr1	16525267	-	1	0	1	0	0	1	1	UPMB	FALSE
chr1	16525773	-	0	0	1	0	0	0	1	PB	FALSE
chr1	16528373	-	1	1	1	0	0	1	1	UAPMB	FALSE
chr1	16528378	-	0	1	1	0	0	1	0	APM	FALSE
chr1	16528380	-	1	1	1	0	0	1	0	UAPM	FALSE
chr1	16528382	-	1	0	1	0	0	0	1	UPB	FALSE
chr1	16532095	-	0	0	0	0	0	1	0	M	FALSE
chr1	16532600	-	0	0	1	0	0	0	1	PB	FALSE
chr1	16578299	-	0	1	1	0	0	0	1	APB	FALSE
chr1	16578302	-	0	1	1	1	1	0	1	APRSB	FALSE
chr1	16578306	-	0	0	1	0	0	0	1	PB	FALSE
chr1	16578308	-	0	1	1	0	0	0	1	APB	FALSE
chr1	16578337	-	0	1	1	0	0	0	1	APB	FALSE
chr1	16578969	-	0	0	0	1	1	0	1	RSB	FALSE
chr1	16579664	-	1	1	1	1	1	1	1	UAPRSMB	TRUE
chr1	16579671	-	0	1	1	1	1	1	1	APRSMB	FALSE
chr1	16582333	-	1	0	1	1	1	0	1	UPRSB	TRUE
chr1	16621432	-	1	1	1	1	0	0	0	UAPR	FALSE
chr1	16621441	-	1	1	1	0	0	0	1	UAPB	FALSE
chr1	16722909	-	0	0	0	0	0	0	1	B	FALSE
chr1	16803591	-	0	0	1	1	1	0	1	PRSB	FALSE
chr1	16803601	-	0	1	1	0	0	1	1	APMB	FALSE
chr1	16810995	-	1	0	1	0	0	0	1	UPB	FALSE
chr1	16811427	-	0	0	1	0	0	0	1	PB	FALSE
chr1	16812218	-	0	1	1	0	0	0	1	APB	FALSE
chr1	16891335	-	0	0	0	1	1	0	1	RSB	FALSE
chr1	16891355	-	0	0	0	1	1	0	1	RSB	FALSE
chr1	16934187	-	0	1	0	0	0	0	1	AB	FALSE
chr1	16934215	-	1	0	1	1	1	0	0	UPRS	TRUE
chr1	16946544	-	0	1	1	0	0	1	1	APMB	FALSE
chr1	16952504	-	0	0	0	0	0	0	1	B	FALSE
chr1	16955180	-	0	1	1	0	0	0	1	APB	FALSE
chr1	16957642	-	0	0	1	0	0	0	1	PB	FALSE
chr1	17303075	-	0	0	1	0	0	0	1	PB	FALSE
chr1	17314984	-	0	0	1	0	0	0	1	PB	FALSE
chr1	17314986	-	0	0	1	0	0	1	1	PMB	FALSE
chr1	17319092	-	1	0	1	0	0	0	1	UPB	FALSE
chr1	17331343	-	0	0	1	0	0	0	1	PB	FALSE
chr1	17345473	-	1	1	1	0	0	1	0	UAPM	FALSE
chr1	17350590	-	1	0	1	0	0	0	1	UPB	FALSE
chr1	17354402	-	1	1	1	0	0	0	0	UAP	FALSE
chr1	17355255	-	0	0	1	0	0	0	1	PB	FALSE
chr1	17355256	-	0	1	1	0	0	0	1	APB	FALSE
chr1	17355263	-	0	0	1	1	1	0	1	PRSB	FALSE
chr1	17359672	-	0	1	1	1	0	1	0	APRM	FALSE
chr1	17735690	-	0	0	0	0	0	0	0		FALSE
chr1	17735710	-	0	1	1	1	1	1	0	APRSM	FALSE
chr1	17735713	-	0	0	1	0	0	0	0	P	FALSE
chr1	17735717	-	0	0	1	0	0	0	0	P	FALSE
chr1	17735720	-	0	1	1	0	0	0	0	AP	FALSE
chr1	17738708	-	1	1	1	1	1	1	0	UAPRSM	TRUE
chr1	17739703	-	1	1	1	1	0	1	0	UAPRM	FALSE
chr1	17740236	-	1	1	1	1	1	1	1	UAPRSMB	TRUE
chr1	17747604	-	0	0	0	0	0	0	1	B	FALSE
chr1	17749361	-	0	0	1	1	0	0	1	PRB	FALSE
chr1	17749369	-	0	0	1	1	1	0	1	PRSB	FALSE
chr1	17749371	-	0	0	1	1	1	0	1	PRSB	FALSE
chr1	17749413	-	0	1	0	0	0	0	1	AB	FALSE
chr1	17752198	-	0	1	1	1	1	1	1	APRSMB	FALSE
chr1	17752204	-	1	1	1	1	1	1	1	UAPRSMB	TRUE
chr1	19201098	-	1	0	1	1	1	0	1	UPRSB	TRUE
chr1	19201101	-	1	0	1	0	0	0	1	UPB	FALSE
chr1	19238601	-	0	1	1	0	0	0	1	APB	FALSE
chr1	19403429	-	0	1	1	0	0	0	1	APB	FALSE
chr1	19403430	-	0	0	1	0	0	1	0	PM	FALSE
chr1	19404583	-	0	1	1	0	0	1	1	APMB	FALSE
chr1	19404584	-	0	0	1	0	0	0	1	PB	FALSE
chr1	19404588	-	0	1	1	0	0	1	1	APMB	FALSE
chr1	19408084	-	0	1	1	0	0	1	1	APMB	FALSE
chr1	19408087	-	1	1	1	1	1	1	1	UAPRSMB	TRUE
chr1	19408090	-	1	0	1	1	1	1	1	UPRSMB	TRUE
chr1	19411220	-	0	1	1	0	0	1	1	APMB	FALSE
chr1	19412786	-	1	0	1	1	1	1	1	UPRSMB	TRUE
chr1	19412798	-	0	1	1	1	1	0	1	APRSB	FALSE
chr1	19413336	-	0	0	1	0	0	0	1	PB	FALSE
chr1	19413343	-	0	0	1	0	0	0	1	PB	FALSE
chr1	19413359	-	1	1	1	1	1	1	1	UAPRSMB	TRUE
chr1	19415493	-	1	0	1	0	0	0	1	UPB	FALSE
chr1	19419434	-	1	1	1	1	1	0	1	UAPRSB	TRUE
chr1	19420651	-	1	1	1	0	0	1	1	UAPMB	FALSE
chr1	19420657	-	0	1	1	1	1	1	1	APRSMB	FALSE
chr1	19420666	-	1	1	1	1	1	1	1	UAPRSMB	TRUE
chr1	19420671	-	1	1	1	0	0	0	1	UAPB	FALSE
chr1	19421540	-	1	1	1	1	1	1	1	UAPRSMB	TRUE
chr1	19423179	-	0	1	1	1	1	1	1	APRSMB	FALSE
chr1	19423184	-	1	1	1	0	0	1	1	UAPMB	FALSE
chr1	19423749	-	0	0	0	0	0	0	1	B	FALSE
chr1	19428159	-	1	1	1	0	0	1	0	UAPM	FALSE
chr1	19430776	-	0	1	1	1	1	1	1	APRSMB	FALSE
chr1	19431182	-	1	1	1	0	0	0	0	UAP	FALSE
chr1	19431424	-	1	0	0	0	0	0	1	UB	FALSE
chr1	19431707	-	0	1	1	0	0	1	0	APM	FALSE
chr1	19431712	-	1	1	1	1	1	0	0	UAPRS	TRUE
chr1	19432364	-	0	0	1	0	0	0	0	P	FALSE
chr1	19432368	-	1	1	1	0	0	1	1	UAPMB	FALSE
chr1	19433220	-	0	0	0	1	0	0	1	RB	FALSE
chr1	19433221	-	0	1	0	1	0	0	1	ARB	FALSE
chr1	19436981	-	0	1	1	1	1	1	1	APRSMB	FALSE
chr1	19437350	-	0	1	1	0	0	1	0	APM	FALSE
chr1	19437351	-	0	0	1	0	0	0	1	PB	FALSE
chr1	19439385	-	0	1	1	0	0	1	1	APMB	FALSE
chr1	19439391	-	1	1	1	1	1	1	1	UAPRSMB	TRUE
chr1	19440632	-	0	1	0	0	0	0	1	AB	FALSE
chr1	19441465	-	1	1	1	1	1	0	1	UAPRSB	TRUE
chr1	19442524	-	1	0	0	0	0	0	1	UB	FALSE
chr1	19443939	-	0	0	1	0	0	0	0	P	FALSE
chr1	19443942	-	1	1	1	0	0	0	0	UAP	FALSE
chr1	19444422	-	1	1	1	0	0	1	0	UAPM	FALSE
chr1	19445195	-	0	1	0	0	0	0	1	AB	FALSE
chr1	19445451	-	0	0	0	0	0	0	1	B	FALSE
chr1	19445467	-	0	1	1	0	0	1	0	APM	FALSE
chr1	19445479	-	1	1	1	1	1	1	1	UAPRSMB	TRUE
chr1	19446218	-	1	1	1	0	0	1	0	UAPM	FALSE
chr1	19446859	-	1	0	1	0	0	1	0	UPM	FALSE
chr1	19448532	-	1	0	1	0	0	1	1	UPMB	FALSE
chr1	19448540	-	1	1	1	1	1	0	1	UAPRSB	TRUE
chr1	19449582	-	0	0	1	0	0	0	1	PB	FALSE
chr1	19449584	-	1	1	1	1	1	1	1	UAPRSMB	TRUE
chr1	19451204	-	0	1	1	1	1	1	1	APRSMB	FALSE
chr1	19451214	-	1	1	1	0	0	1	0	UAPM	FALSE
chr1	19451409	-	0	1	0	0	0	0	1	AB	FALSE
chr1	19453171	-	1	0	1	1	1	1	0	UPRSM	TRUE
chr1	19453177	-	0	0	1	1	1	0	1	PRSB	FALSE
chr1	19453178	-	0	0	1	1	1	0	0	PRS	FALSE
chr1	19453187	-	0	1	1	1	0	1	0	APRM	FALSE
chr1	19453190	-	1	1	1	0	0	1	0	UAPM	FALSE
chr1	19453815	-	0	0	0	1	1	0	1	RSB	FALSE
chr1	19454252	-	1	1	1	1	0	1	0	UAPRM	FALSE
chr1	19454264	-	0	1	1	1	0	1	0	APRM	FALSE
chr1	19454268	-	0	1	1	1	0	0	0	APR	FALSE
chr1	19454269	-	0	0	1	0	0	1	0	PM	FALSE
chr1	19454271	-	0	1	1	1	1	0	1	APRSB	FALSE
chr1	19454816	-	0	0	0	1	0	1	0	RM	FALSE
chr1	19454837	-	0	0	1	0	0	0	0	P	FALSE
chr1	19454838	-	1	0	1	0	0	1	0	UPM	FALSE
chr1	19454846	-	0	1	1	0	0	1	1	APMB	FALSE
chr1	19454847	-	0	1	1	0	0	1	0	APM	FALSE
chr1	19454848	-	0	0	1	0	0	0	0	P	FALSE
chr1	19454849	-	0	0	1	1	0	0	0	PR	FALSE
chr1	19464704	-	1	1	1	1	1	1	1	UAPRSMB	TRUE
chr1	19467405	-	1	1	1	1	1	1	1	UAPRSMB	TRUE
chr1	19470591	-	1	1	0	0	0	0	0	UA	FALSE
chr1	19470606	-	1	1	1	0	0	1	0	UAPM	FALSE
chr1	19470614	-	0	1	1	0	0	0	1	APB	FALSE
chr1	19471421	-	0	0	1	1	0	0	1	PRB	FALSE
chr1	19471422	-	0	1	1	0	0	1	1	APMB	FALSE
chr1	19471432	-	0	1	1	0	0	1	0	APM	FALSE
chr1	19472449	-	0	1	1	0	0	1	0	APM	FALSE
chr1	19473520	-	1	1	1	1	0	1	0	UAPRM	FALSE
chr1	19474211	-	0	0	0	0	0	0	1	B	FALSE
chr1	19474642	-	1	1	1	1	0	1	0	UAPRM	FALSE
chr1	19477287	-	0	0	0	0	0	0	1	B	FALSE
chr1	19478375	-	1	1	1	1	1	1	1	UAPRSMB	TRUE
chr1	19478993	-	1	1	1	0	0	1	0	UAPM	FALSE
chr1	19480014	-	1	0	1	1	1	0	1	UPRSB	TRUE
chr1	19480027	-	0	1	1	0	0	0	0	AP	FALSE
chr1	19480458	-	1	1	1	1	1	1	1	UAPRSMB	TRUE
chr1	19480470	-	1	1	1	0	0	0	1	UAPB	FALSE
chr1	19481590	-	1	1	1	0	0	1	1	UAPMB	FALSE
chr1	19481597	-	1	1	1	1	1	1	0	UAPRSM	TRUE
chr1	19482186	-	0	1	1	1	1	1	1	APRSMB	FALSE
chr1	19482920	-	0	0	0	0	0	0	0		FALSE
chr1	19482944	-	1	1	1	1	1	1	1	UAPRSMB	TRUE
chr1	19484436	-	0	1	0	1	1	0	1	ARSB	FALSE
chr1	19484519	-	1	0	1	1	1	1	1	UPRSMB	TRUE
chr1	19484523	-	1	1	1	0	0	1	1	UAPMB	FALSE
chr1	19484558	-	0	1	0	0	0	0	1	AB	FALSE
chr1	19486802	-	1	1	1	1	1	1	1	UAPRSMB	TRUE
chr1	19487352	-	0	0	0	0	0	0	1	B	FALSE
chr1	19487577	-	0	1	0	0	0	0	1	AB	FALSE
chr1	19487663	-	0	1	1	0	0	1	1	APMB	FALSE
chr1	19487664	-	0	0	1	1	1	0	0	PRS	FALSE
chr1	19487667	-	0	1	1	1	1	1	0	APRSM	FALSE
chr1	19487668	-	0	0	1	1	1	0	1	PRSB	FALSE
chr1	19487824	-	0	0	0	0	0	0	1	B	FALSE
chr1	19488406	-	1	0	1	0	0	0	0	UP	FALSE
chr1	19488412	-	0	1	1	0	0	1	0	APM	FALSE
chr1	19489130	-	1	1	1	1	0	0	0	UAPR	FALSE
chr1	19490216	-	0	0	0	1	1	0	0	RS	FALSE
chr1	19490263	-	0	0	0	0	0	0	1	B	FALSE
chr1	19490363	-	1	1	1	1	0	1	0	UAPRM	FALSE
chr1	19490961	-	1	1	1	1	1	1	1	UAPRSMB	TRUE
chr1	19490965	-	0	1	1	0	0	1	1	APMB	FALSE
chr1	19491492	-	0	1	0	1	1	0	1	ARSB	FALSE
chr1	19491516	-	1	1	1	1	1	1	1	UAPRSMB	TRUE
chr1	19491893	-	0	0	1	0	0	0	1	PB	FALSE
chr1	19491915	-	0	0	0	0	0	0	1	B	FALSE
chr1	19492271	-	1	1	1	0	0	1	0	UAPM	FALSE
chr1	19494737	-	0	0	1	0	0	1	0	PM	FALSE
chr1	19494738	-	0	0	1	1	1	0	1	PRSB	FALSE
chr1	19496055	-	0	1	1	0	0	1	0	APM	FALSE
chr1	19497408	-	0	1	1	0	0	1	0	APM	FALSE
chr1	19500147	-	1	0	1	0	0	1	0	UPM	FALSE
chr1	19500972	-	0	1	1	0	0	0	1	APB	FALSE
chr1	19501004	-	1	0	0	0	0	0	1	UB	FALSE
chr1	19501546	-	1	1	1	1	1	1	1	UAPRSMB	TRUE
chr1	19501547	-	0	1	1	0	0	1	0	APM	FALSE
chr1	19503221	-	0	0	0	0	0	0	0		FALSE
chr1	19503244	-	0	1	1	1	1	1	1	APRSMB	FALSE
chr1	19503245	-	1	1	1	1	1	1	1	UAPRSMB	TRUE
chr1	19504256	-	1	0	1	1	0	1	0	UPRM	FALSE
chr1	19505741	-	1	1	1	0	0	0	0	UAP	FALSE
chr1	19505750	-	0	0	1	0	0	0	1	PB	FALSE
chr1	19510227	-	0	0	0	0	0	0	0		FALSE
chr1	19510426	-	1	0	1	1	0	0	0	UPR	FALSE
chr1	19510696	-	0	1	1	1	1	0	1	APRSB	FALSE
chr1	19510700	-	0	0	1	0	0	1	0	PM	FALSE
chr1	19513179	-	0	0	1	0	0	0	1	PB	FALSE
chr1	19523759	-	0	0	0	1	0	0	0	R	FALSE
chr1	19525187	-	1	0	1	0	0	1	0	UPM	FALSE
chr1	19525201	-	0	0	1	0	0	0	1	PB	FALSE
chr1	19525202	-	1	0	1	1	1	1	1	UPRSMB	TRUE
chr1	19525474	-	0	0	1	1	1	0	1	PRSB	FALSE
chr1	19525486	-	0	1	0	0	0	0	1	AB	FALSE
chr1	19528328	-	1	1	1	0	0	0	1	UAPB	FALSE
chr1	19528331	-	0	0	1	0	0	0	0	P	FALSE
chr1	19528332	-	1	0	1	0	0	0	0	UP	FALSE
chr1	19547333	-	1	0	0	0	0	0	1	UB	FALSE
chr1	19553971	-	1	1	1	1	1	0	1	UAPRSB	TRUE
chr1	19554021	-	0	0	0	0	0	0	1	B	FALSE
chr1	19557222	-	1	1	0	0	0	0	1	UAB	FALSE
chr1	19557933	-	1	1	1	0	0	0	1	UAPB	FALSE
chr1	19559660	-	0	1	1	0	0	0	1	APB	FALSE
chr1	19559661	-	0	0	1	0	0	1	1	PMB	FALSE
chr1	19563760	-	1	1	1	1	0	0	0	UAPR	FALSE
chr1	19565157	-	1	0	0	1	0	0	1	URB	FALSE
chr1	19565380	-	1	1	1	1	1	0	0	UAPRS	TRUE
chr1	19566479	-	0	0	0	0	0	0	0		FALSE
chr1	19566500	-	1	0	1	0	0	0	0	UP	FALSE
chr1	19566957	-	1	1	1	0	0	0	1	UAPB	FALSE
chr1	19567664	-	1	1	1	1	1	0	1	UAPRSB	TRUE
chr1	19568408	-	0	0	0	0	0	0	1	B	FALSE
chr1	19568967	-	0	0	0	1	0	0	0	R	FALSE
chr1	19568983	-	1	0	1	0	0	1	0	UPM	FALSE
chr1	19569394	-	0	1	0	0	0	0	1	AB	FALSE
chr1	19570222	-	0	1	1	0	0	1	0	APM	FALSE
chr1	19570532	-	1	1	1	0	0	0	1	UAPB	FALSE
chr1	19595882	-	1	1	1	0	0	0	0	UAP	FALSE
chr1	19634776	-	1	1	1	1	1	1	0	UAPRSM	TRUE
chr1	19670944	-	1	1	1	1	1	1	1	UAPRSMB	TRUE
chr1	19671839	-	0	1	0	0	0	0	1	AB	FALSE
chr1	19683270	-	1	1	1	1	0	1	0	UAPRM	FALSE
chr1	20063975	-	0	1	1	0	0	0	0	AP	FALSE
chr1	20732255	-	0	0	0	0	0	0	1	B	FALSE
chr1	20827930	-	1	1	1	1	0	1	0	UAPRM	FALSE
chr1	20827935	-	1	0	1	0	0	1	0	UPM	FALSE
chr1	20828698	-	1	1	1	0	0	1	0	UAPM	FALSE
chr1	20979040	-	1	0	1	1	1	0	1	UPRSB	TRUE
chr1	20980286	-	1	0	1	0	0	0	0	UP	FALSE
chr1	20980529	-	1	0	0	0	0	0	1	UB	FALSE
chr1	20987516	-	0	0	1	0	0	1	1	PMB	FALSE
chr1	21050247	-	1	1	1	0	0	0	1	UAPB	FALSE
chr1	21058103	-	1	1	0	0	0	1	1	UAMB	FALSE
chr1	21069412	-	0	1	0	0	0	1	1	AMB	FALSE
chr1	21072169	-	1	1	1	1	1	1	1	UAPRSMB	TRUE
chr1	21097590	-	0	1	1	0	0	1	1	APMB	FALSE
chr1	21103270	-	1	1	1	1	1	1	1	UAPRSMB	TRUE
chr1	21106423	-	1	1	1	0	0	1	0	UAPM	FALSE
chr1	21106426	-	1	1	1	1	1	0	1	UAPRSB	TRUE
chr1	21155782	-	1	0	1	0	0	1	1	UPMB	FALSE
chr1	21176063	-	1	0	1	1	1	0	1	UPRSB	TRUE
chr1	21176068	-	0	1	1	0	0	0	1	APB	FALSE
chr1	21176070	-	1	1	1	0	0	0	1	UAPB	FALSE
chr1	21184009	-	0	0	1	1	1	0	1	PRSB	FALSE
chr1	21184010	-	0	0	1	0	0	0	1	PB	FALSE
chr1	21226436	-	0	0	0	0	0	0	0		FALSE
chr1	21503183	-	0	0	0	0	0	0	1	B	FALSE
chr1	21546654	-	1	1	1	1	1	1	1	UAPRSMB	TRUE
chr1	21548358	-	1	1	1	0	0	1	0	UAPM	FALSE
chr1	21553737	-	1	0	1	0	0	1	0	UPM	FALSE
chr1	21553746	-	0	1	1	0	0	1	1	APMB	FALSE
chr1	21560174	-	1	1	1	0	0	1	1	UAPMB	FALSE
chr1	21560178	-	1	1	1	0	0	1	1	UAPMB	FALSE
chr1	21571617	-	0	0	1	0	0	0	1	PB	FALSE
chr1	21571622	-	1	1	1	1	1	1	1	UAPRSMB	TRUE
chr1	21573875	-	1	1	1	0	0	1	1	UAPMB	FALSE
chr1	21584083	-	0	0	0	0	0	0	1	B	FALSE
chr1	21584102	-	0	1	1	0	0	1	1	APMB	FALSE
chr1	21585356	-	0	0	1	0	0	0	1	PB	FALSE
chr1	21924573	-	0	0	1	0	0	0	1	PB	FALSE
chr1	21924588	-	0	0	1	0	0	0	0	P	FALSE
chr1	21935437	-	0	1	0	0	0	0	1	AB	FALSE
chr1	21938309	-	0	0	0	0	0	0	1	B	FALSE
chr1	21940221	-	0	1	1	0	0	0	1	APB	FALSE
chr1	21940222	-	0	0	1	0	0	0	0	P	FALSE
chr1	21943984	-	0	0	0	0	0	1	1	MB	FALSE
chr1	21944001	-	0	1	1	0	0	1	0	APM	FALSE
chr1	22013767	-	1	0	1	1	1	0	0	UPRS	TRUE
chr1	22021214	-	1	0	0	0	0	0	1	UB	FALSE
chr1	22030143	-	1	0	1	0	0	0	0	UP	FALSE
chr1	22030148	-	1	1	1	0	0	1	0	UAPM	FALSE
chr1	22030152	-	0	0	1	0	0	0	0	P	FALSE
chr1	22032366	-	1	1	1	1	1	1	0	UAPRSM	TRUE
chr1	22032711	-	0	1	1	1	0	1	0	APRM	FALSE
chr1	22032712	-	0	0	1	0	0	1	0	PM	FALSE
chr1	22033108	-	0	1	1	1	0	0	0	APR	FALSE
chr1	22033400	-	0	0	0	0	0	1	1	MB	FALSE
chr1	22047686	-	0	1	1	0	0	1	0	APM	FALSE
chr1	22047688	-	1	1	1	0	0	0	1	UAPB	FALSE
chr1	22048294	-	0	1	1	0	0	1	0	APM	FALSE
chr1	22048298	-	0	0	1	0	0	0	1	PB	FALSE
chr1	22074788	-	1	1	1	0	0	0	1	UAPB	FALSE
chr1	22083194	-	1	1	0	0	0	0	0	UA	FALSE
chr1	22150031	-	0	0	1	0	0	0	1	PB	FALSE
chr1	22151199	-	0	0	0	0	0	0	1	B	FALSE
chr1	22151289	-	0	0	1	1	1	0	1	PRSB	FALSE
chr1	22151293	-	0	1	1	1	1	1	1	APRSMB	FALSE
chr1	22151296	-	0	0	1	0	0	0	1	PB	FALSE
chr1	22151302	-	0	1	1	0	0	1	1	APMB	FALSE
chr1	22154941	-	0	0	1	0	0	0	1	PB	FALSE
chr1	22154942	-	0	0	1	1	1	0	1	PRSB	FALSE
chr1	22155594	-	1	1	1	1	1	1	1	UAPRSMB	TRUE
chr1	22155598	-	0	0	1	1	1	1	1	PRSMB	FALSE
chr1	22155602	-	0	0	1	0	0	0	1	PB	FALSE
chr1	22155604	-	0	0	1	0	0	0	1	PB	FALSE
chr1	22156113	-	1	1	1	0	0	0	1	UAPB	FALSE
chr1	22158337	-	0	1	1	1	1	1	1	APRSMB	FALSE
chr1	22158712	-	0	0	0	0	0	0	1	B	FALSE
chr1	22159118	-	0	1	1	0	0	1	1	APMB	FALSE
chr1	22159877	-	0	0	0	1	1	0	1	RSB	FALSE
chr1	22160107	-	0	0	0	0	0	0	1	B	FALSE
chr1	22160125	-	0	1	1	1	1	1	1	APRSMB	FALSE
chr1	22160136	-	0	0	1	0	0	0	0	P	FALSE
chr1	22160446	-	1	1	1	1	1	1	1	UAPRSMB	TRUE
chr1	22160504	-	0	0	0	0	0	0	1	B	FALSE
chr1	22161457	-	1	0	1	0	0	0	0	UP	FALSE
chr1	22161465	-	0	1	1	1	1	1	1	APRSMB	FALSE
chr1	22161466	-	0	0	1	0	0	1	1	PMB	FALSE
chr1	22161470	-	1	1	1	1	1	1	1	UAPRSMB	TRUE
chr1	22163481	-	1	0	0	0	0	1	1	UMB	FALSE
chr1	22163492	-	0	0	0	0	0	1	1	MB	FALSE
chr1	22163497	-	0	0	0	0	0	0	1	B	FALSE
chr1	22163514	-	0	1	1	0	0	1	0	APM	FALSE
chr1	22163519	-	1	1	1	1	1	1	1	UAPRSMB	TRUE
chr1	22163524	-	0	0	1	1	1	1	1	PRSMB	FALSE
chr1	22163525	-	0	0	1	0	0	0	1	PB	FALSE
chr1	22166058	-	0	0	1	1	1	0	1	PRSB	FALSE
chr1	22166072	-	1	1	1	0	0	1	0	UAPM	FALSE
chr1	22166076	-	0	1	1	1	1	0	1	APRSB	FALSE
chr1	22167801	-	0	1	1	0	0	1	1	APMB	FALSE
chr1	22167803	-	0	0	1	1	1	0	1	PRSB	FALSE
chr1	22168253	-	0	1	0	0	0	0	1	AB	FALSE
chr1	22168878	-	1	0	0	0	0	0	1	UB	FALSE
chr1	22168892	-	1	0	1	0	0	0	1	UPB	FALSE
chr1	22168896	-	1	1	1	0	0	1	0	UAPM	FALSE
chr1	22169262	-	0	0	0	0	0	0	1	B	FALSE
chr1	22169433	-	0	0	1	0	0	0	1	PB	FALSE
chr1	22169434	-	0	1	1	1	1	1	1	APRSMB	FALSE
chr1	22169435	-	0	0	1	1	1	0	1	PRSB	FALSE
chr1	22169436	-	0	0	1	1	1	0	1	PRSB	FALSE
chr1	22169437	-	0	0	1	0	0	0	1	PB	FALSE
chr1	22169440	-	0	0	1	0	0	1	1	PMB	FALSE
chr1	22169647	-	0	0	0	0	0	0	1	B	FALSE
chr1	22169961	-	1	1	1	1	1	1	1	UAPRSMB	TRUE
chr1	22169968	-	0	0	1	0	0	1	1	PMB	FALSE
chr1	22170815	-	1	1	1	0	0	1	0	UAPM	FALSE
chr1	22173130	-	1	1	1	0	0	0	1	UAPB	FALSE
chr1	22173208	-	0	1	0	0	0	0	1	AB	FALSE
chr1	22174017	-	0	0	1	1	1	0	1	PRSB	FALSE
chr1	22174018	-	0	0	1	1	1	0	1	PRSB	FALSE
chr1	22174019	-	0	0	1	0	0	0	1	PB	FALSE
chr1	22174021	-	0	1	1	0	0	1	0	APM	FALSE
chr1	22174022	-	0	0	1	0	0	0	1	PB	FALSE
chr1	22174023	-	0	0	1	1	1	1	1	PRSMB	FALSE
chr1	22174024	-	0	0	1	1	1	1	1	PRSMB	FALSE
chr1	22174026	-	0	0	1	0	0	0	1	PB	FALSE
chr1	22174032	-	0	1	1	0	0	1	1	APMB	FALSE
chr1	22174037	-	1	1	1	0	0	1	0	UAPM	FALSE
chr1	22174218	-	0	0	0	0	0	0	1	B	FALSE
chr1	22174602	-	1	0	1	1	1	0	1	UPRSB	TRUE
chr1	22174608	-	0	0	1	1	1	0	1	PRSB	FALSE
chr1	22174609	-	0	0	1	0	0	0	0	P	FALSE
chr1	22174614	-	1	0	1	1	1	1	1	UPRSMB	TRUE
chr1	22175547	-	1	0	1	0	0	0	1	UPB	FALSE
chr1	22175553	-	1	1	1	1	1	1	1	UAPRSMB	TRUE
chr1	22175712	-	0	0	0	0	0	0	1	B	FALSE
chr1	22176934	-	1	0	0	0	0	0	1	UB	FALSE
chr1	22176991	-	0	0	0	0	0	0	1	B	FALSE
chr1	22177011	-	1	1	1	0	0	1	1	UAPMB	FALSE
chr1	22178190	-	0	0	0	0	0	0	1	B	FALSE
chr1	22178744	-	0	0	1	0	0	0	1	PB	FALSE
chr1	22179582	-	1	1	1	0	0	1	1	UAPMB	FALSE
chr1	22180861	-	0	0	1	0	0	1	1	PMB	FALSE
chr1	22180862	-	1	1	1	0	0	1	0	UAPM	FALSE
chr1	22181494	-	1	0	1	0	0	1	1	UPMB	FALSE
chr1	22181495	-	1	1	1	0	0	1	1	UAPMB	FALSE
chr1	22181500	-	0	1	1	1	1	1	1	APRSMB	FALSE
chr1	22181502	-	0	0	1	0	0	0	1	PB	FALSE
chr1	22186195	-	0	1	1	0	0	1	1	APMB	FALSE
chr1	22186509	-	0	0	1	1	0	0	0	PR	FALSE
chr1	22186527	-	1	1	1	0	0	0	1	UAPB	FALSE
chr1	22191878	-	1	1	1	1	1	1	1	UAPRSMB	TRUE
chr1	22192329	-	0	0	1	0	0	0	1	PB	FALSE
chr1	22198895	-	1	1	1	0	0	0	1	UAPB	FALSE
chr1	22199272	-	0	0	1	1	1	0	1	PRSB	FALSE
chr1	22199273	-	0	0	1	0	0	0	1	PB	FALSE
chr1	22199274	-	0	0	1	1	1	0	1	PRSB	FALSE
chr1	22199275	-	0	0	1	1	1	0	1	PRSB	FALSE
chr1	22199288	-	1	1	1	1	1	1	1	UAPRSMB	TRUE
chr1	22199292	-	0	1	1	1	0	1	1	APRMB	FALSE
chr1	22200505	-	0	1	0	0	0	1	1	AMB	FALSE
chr1	22200528	-	1	1	1	1	1	0	1	UAPRSB	TRUE
chr1	22201245	-	1	0	1	1	1	0	1	UPRSB	TRUE
chr1	22202502	-	0	1	0	0	0	0	1	AB	FALSE
chr1	22202557	-	1	0	1	0	0	0	0	UP	FALSE
chr1	22202624	-	0	1	0	0	0	0	1	AB	FALSE
chr1	22204308	-	0	0	0	0	0	0	1	B	FALSE
chr1	22204728	-	1	0	0	0	0	0	1	UB	FALSE
chr1	22204769	-	1	0	1	1	1	1	1	UPRSMB	TRUE
chr1	22206770	-	0	1	1	1	0	1	0	APRM	FALSE
chr1	22206772	-	1	0	1	1	1	1	1	UPRSMB	TRUE
chr1	22208017	-	0	1	1	1	1	1	0	APRSM	FALSE
chr1	22211667	-	0	0	1	1	1	1	1	PRSMB	FALSE
chr1	22211668	-	0	0	1	1	1	0	1	PRSB	FALSE
chr1	22211671	-	0	1	1	1	1	1	1	APRSMB	FALSE
chr1	22211965	-	0	1	1	0	0	1	0	APM	FALSE
chr1	22212013	-	0	1	0	0	0	0	1	AB	FALSE
chr1	22222459	-	0	0	0	0	0	0	1	B	FALSE
chr1	22222482	-	1	1	1	1	1	0	1	UAPRSB	TRUE
chr1	23637837	-	1	1	1	1	1	1	1	UAPRSMB	TRUE
chr1	23637839	-	1	1	1	1	1	1	0	UAPRSM	TRUE
chr1	23640225	-	0	1	1	0	0	1	0	APM	FALSE
chr1	23640243	-	0	0	1	0	0	0	1	PB	FALSE
chr1	23645205	-	1	1	1	1	1	1	1	UAPRSMB	TRUE
chr1	23645212	-	1	0	1	1	0	0	0	UPR	FALSE
chr1	23645213	-	1	0	1	1	0	0	0	UPR	FALSE
chr1	23660147	-	0	1	1	0	0	1	0	APM	FALSE
chr1	23664354	-	0	0	0	1	1	0	1	RSB	FALSE
chr1	23664377	-	0	0	1	0	0	0	0	P	FALSE
chr1	23664385	-	1	1	1	1	1	1	1	UAPRSMB	TRUE
chr1	23693683	-	0	1	1	0	0	0	1	APB	FALSE
chr1	23708071	-	0	0	0	0	0	0	1	B	FALSE
chr1	23756446	-	1	0	1	0	0	0	1	UPB	FALSE
chr1	23757646	-	0	0	1	0	0	0	1	PB	FALSE
chr1	23759768	-	0	0	0	0	0	0	1	B	FALSE
chr1	23762521	-	0	0	0	0	0	0	1	B	FALSE
chr1	23767734	-	0	0	1	0	0	1	1	PMB	FALSE
chr1	23767736	-	0	0	1	0	0	0	1	PB	FALSE
chr1	23767991	-	1	1	1	1	1	1	1	UAPRSMB	TRUE
chr1	23768239	-	1	0	1	1	0	0	1	UPRB	FALSE
chr1	23779283	-	0	1	1	0	0	1	0	APM	FALSE
chr1	23847588	-	1	1	1	0	0	0	0	UAP	FALSE
chr1	23884939	-	1	1	1	1	1	1	1	UAPRSMB	TRUE
chr1	23885315	-	0	0	0	0	0	0	0		FALSE
chr1	23885397	-	0	0	0	0	0	0	1	B	FALSE
chr1	23885508	-	0	0	0	0	0	1	1	MB	FALSE
chr1	24123618	-	1	0	0	0	0	1	0	UM	FALSE
chr1	24124381	-	1	1	1	0	0	0	1	UAPB	FALSE
chr1	24134834	-	0	1	1	0	0	1	1	APMB	FALSE
chr1	24143287	-	1	1	1	1	0	1	0	UAPRM	FALSE
chr1	24298141	-	1	1	1	0	0	1	0	UAPM	FALSE
chr1	24401988	-	1	0	1	0	0	0	1	UPB	FALSE
chr1	24432596	-	1	1	1	0	0	1	1	UAPMB	FALSE
chr1	24486155	-	0	1	1	0	0	0	1	APB	FALSE
chr1	24685136	-	1	1	1	0	0	1	0	UAPM	FALSE
chr1	24696355	-	1	0	1	0	0	1	1	UPMB	FALSE
chr1	24706336	-	1	1	1	0	0	0	1	UAPB	FALSE
chr1	25549939	-	1	1	1	0	0	1	1	UAPMB	FALSE
chr1	25554022	-	1	1	0	0	0	0	0	UA	FALSE
chr1	25554035	-	1	0	1	0	0	1	1	UPMB	FALSE
chr1	25554043	-	1	1	1	1	1	1	1	UAPRSMB	TRUE
chr1	25554745	-	0	1	1	0	0	0	0	AP	FALSE
chr1	25554747	-	0	0	1	1	1	0	1	PRSB	FALSE
chr1	25554757	-	1	1	1	0	0	1	0	UAPM	FALSE
chr1	25558727	-	1	0	1	0	0	0	1	UPB	FALSE
chr1	25569216	-	1	1	1	0	0	0	1	UAPB	FALSE
chr1	25570733	-	1	0	1	1	1	1	1	UPRSMB	TRUE
chr1	25570737	-	0	1	1	1	1	1	0	APRSM	FALSE
chr1	25570863	-	1	0	0	0	0	0	1	UB	FALSE
chr1	25571019	-	1	1	1	1	1	1	1	UAPRSMB	TRUE
chr1	25571024	-	0	1	1	0	0	1	0	APM	FALSE
chr1	25571826	-	0	1	1	1	1	1	1	APRSMB	FALSE
chr1	25573526	-	1	0	0	0	0	0	1	UB	FALSE
chr1	25573546	-	1	0	1	0	0	1	0	UPM	FALSE
chr1	26162362	-	0	1	1	1	0	0	0	APR	FALSE
chr1	26162580	-	1	0	0	0	0	0	1	UB	FALSE
chr1	26228195	-	1	0	1	0	0	0	1	UPB	FALSE
chr1	26230461	-	0	1	0	0	0	0	1	AB	FALSE
chr1	26231251	-	0	1	1	0	0	1	1	APMB	FALSE
chr1	26299226	-	1	0	1	0	0	0	1	UPB	FALSE
chr1	26317433	-	0	0	1	0	0	0	1	PB	FALSE
chr1	26385132	-	0	1	1	0	0	1	1	APMB	FALSE
chr1	26609448	-	0	0	1	0	0	0	1	PB	FALSE
chr1	26609453	-	1	0	1	0	0	0	0	UP	FALSE
chr1	26610997	-	1	0	1	1	1	0	0	UPRS	TRUE
chr1	26610998	-	1	0	1	1	1	0	1	UPRSB	TRUE
chr1	26611001	-	0	0	1	1	1	0	1	PRSB	FALSE
chr1	26611002	-	1	0	1	1	1	1	1	UPRSMB	TRUE
chr1	26611076	-	0	1	0	0	0	0	1	AB	FALSE
chr1	26612052	-	0	1	1	0	0	0	1	APB	FALSE
chr1	26612059	-	0	0	1	0	0	0	0	P	FALSE
chr1	26628248	-	1	0	1	0	0	1	1	UPMB	FALSE
chr1	27206240	-	0	0	0	0	0	0	1	B	FALSE
chr1	27217717	-	0	0	0	0	0	0	1	B	FALSE
chr1	27217739	-	1	1	1	0	0	0	0	UAP	FALSE
chr1	27219973	-	1	1	1	0	0	1	0	UAPM	FALSE
chr1	27221110	-	0	0	0	0	0	0	1	B	FALSE
chr1	27427788	-	1	1	1	1	0	1	0	UAPRM	FALSE
chr1	27429078	-	0	0	1	1	0	0	0	PR	FALSE
chr1	27429821	-	0	1	1	0	0	0	1	APB	FALSE
chr1	27682255	-	0	0	1	0	0	0	1	PB	FALSE
chr1	27682294	-	0	0	1	0	0	0	1	PB	FALSE
chr1	27688378	-	1	1	1	1	1	1	1	UAPRSMB	TRUE
chr1	27688400	-	0	0	1	0	0	0	1	PB	FALSE
chr1	27690921	-	1	0	1	0	0	1	0	UPM	FALSE
chr1	27734863	-	1	1	1	0	0	0	1	UAPB	FALSE
chr1	27734867	-	0	0	1	1	1	0	1	PRSB	FALSE
chr1	27736724	-	1	1	1	1	1	1	1	UAPRSMB	TRUE
chr1	27736730	-	1	1	1	1	0	0	0	UAPR	FALSE
chr1	27739249	-	1	1	1	0	0	0	1	UAPB	FALSE
chr1	27741485	-	0	1	1	1	0	1	0	APRM	FALSE
chr1	27742690	-	0	0	0	0	0	0	1	B	FALSE
chr1	27744943	-	1	1	1	1	0	0	0	UAPR	FALSE
chr1	27942384	-	0	0	1	0	0	0	1	PB	FALSE
chr1	27995551	-	0	0	0	0	0	0	1	B	FALSE
chr1	27995887	-	1	0	1	0	0	0	1	UPB	FALSE
chr1	27995899	-	0	0	1	0	0	0	1	PB	FALSE
chr1	28218785	-	1	1	1	1	1	0	1	UAPRSB	TRUE
chr1	28315197	-	0	1	1	0	0	1	0	APM	FALSE
chr1	28315203	-	0	1	1	0	0	1	1	APMB	FALSE
chr1	28323889	-	0	0	0	1	1	0	1	RSB	FALSE
chr1	28326581	-	1	1	1	1	1	0	1	UAPRSB	TRUE
chr1	28337620	-	0	1	1	0	0	1	1	APMB	FALSE
chr1	28339840	-	1	0	1	0	0	1	1	UPMB	FALSE
chr1	28531894	-	1	1	1	0	0	1	0	UAPM	FALSE
chr1	28531933	-	0	0	0	0	0	0	1	B	FALSE
chr1	28536596	-	1	1	1	1	1	1	1	UAPRSMB	TRUE
chr1	28536601	-	0	1	1	1	0	0	1	APRB	FALSE
chr1	28536604	-	0	1	1	0	0	1	0	APM	FALSE
chr1	28537198	-	0	1	1	0	0	0	0	AP	FALSE
chr1	28555561	-	1	1	1	0	0	1	1	UAPMB	FALSE
chr1	28905192	-	0	0	0	0	0	0	0		FALSE
chr1	28905216	-	1	1	1	1	1	1	0	UAPRSM	TRUE
chr1	28905222	-	0	1	1	0	0	0	0	AP	FALSE
chr1	28906125	-	1	1	1	1	1	1	0	UAPRSM	TRUE
chr1	28906515	-	1	1	1	1	1	0	1	UAPRSB	TRUE
chr1	28906956	-	0	0	0	0	0	0	0		FALSE
chr1	28907171	-	1	1	1	0	0	1	1	UAPMB	FALSE
chr1	28907183	-	1	1	1	1	1	1	1	UAPRSMB	TRUE
chr1	28907186	-	1	1	1	1	1	1	1	UAPRSMB	TRUE
chr1	28907193	-	1	1	1	0	0	0	0	UAP	FALSE
chr1	28907424	-	1	0	0	0	0	0	1	UB	FALSE
chr1	28907768	-	1	1	1	1	1	0	1	UAPRSB	TRUE
chr1	28907771	-	1	0	1	1	1	0	1	UPRSB	TRUE
chr1	28931995	-	1	0	1	1	1	1	1	UPRSMB	TRUE
chr1	29448378	-	0	0	1	0	0	1	1	PMB	FALSE
chr1	29448379	-	0	0	1	1	1	0	1	PRSB	FALSE
chr1	29448380	-	1	0	1	0	0	0	1	UPB	FALSE
chr1	29475760	-	0	1	1	0	0	1	1	APMB	FALSE
chr1	29475765	-	0	1	1	0	0	1	1	APMB	FALSE
chr1	29487036	-	1	0	0	1	1	0	1	URSB	FALSE
chr1	29487055	-	1	1	1	0	0	0	1	UAPB	FALSE
chr1	29492604	-	0	1	1	0	0	0	0	AP	FALSE
chr1	29493475	-	0	0	1	1	1	0	1	PRSB	FALSE
chr1	29520711	-	1	1	1	0	0	0	1	UAPB	FALSE
chr1	29520720	-	1	0	1	0	0	0	1	UPB	FALSE
chr1	29520723	-	1	0	1	0	0	0	1	UPB	FALSE
chr1	29522523	-	1	0	0	1	0	0	0	UR	FALSE
chr1	29522545	-	0	1	1	0	0	1	0	APM	FALSE
chr1	29522547	-	0	0	1	0	0	1	0	PM	FALSE
chr1	29522796	-	0	1	1	0	0	0	0	AP	FALSE
chr1	29522797	-	0	0	1	1	0	1	0	PRM	FALSE
chr1	29527127	-	1	0	1	1	1	0	1	UPRSB	TRUE
chr1	29528581	-	1	0	1	1	0	1	0	UPRM	FALSE
chr1	29533183	-	0	0	0	0	0	0	0		FALSE
chr1	31210642	-	0	0	0	0	0	0	1	B	FALSE
chr1	31230464	-	0	0	0	1	1	0	1	RSB	FALSE
chr1	31406212	-	0	1	1	0	0	1	1	APMB	FALSE
chr1	31413287	-	0	0	0	0	0	0	1	B	FALSE
chr1	31414150	-	0	1	1	0	0	1	1	APMB	FALSE
chr1	31414154	-	0	1	1	1	0	0	1	APRB	FALSE
chr1	31418364	-	0	0	1	0	0	0	1	PB	FALSE
chr1	31418366	-	1	0	1	0	0	1	1	UPMB	FALSE
chr1	31423126	-	1	1	1	0	0	1	1	UAPMB	FALSE
chr1	31425231	-	1	0	1	0	0	0	1	UPB	FALSE
chr1	31425239	-	0	0	1	0	0	0	1	PB	FALSE
chr1	31437777	-	1	1	1	1	0	1	0	UAPRM	FALSE
chr1	31437782	-	1	0	1	1	1	1	1	UPRSMB	TRUE
chr1	31437786	-	1	0	1	0	0	1	1	UPMB	FALSE
chr1	31437823	-	0	1	0	0	0	1	1	AMB	FALSE
chr1	31440192	-	1	1	1	1	1	1	1	UAPRSMB	TRUE
chr1	31441362	-	1	0	1	0	0	0	1	UPB	FALSE
chr1	31447653	-	0	0	0	0	0	0	0		FALSE
chr1	31447667	-	1	0	1	1	0	1	1	UPRMB	FALSE
chr1	31453028	-	1	1	0	0	0	0	0	UA	FALSE
chr1	31453076	-	0	0	1	1	1	0	1	PRSB	FALSE
chr1	31453864	-	0	0	0	0	0	0	1	B	FALSE
chr1	31465543	-	0	1	1	0	0	1	1	APMB	FALSE
chr1	31478901	-	1	0	1	0	0	1	1	UPMB	FALSE
chr1	31478903	-	0	1	1	1	1	1	1	APRSMB	FALSE
chr1	31478908	-	1	1	1	1	1	1	1	UAPRSMB	TRUE
chr1	31532422	-	0	0	0	0	0	1	1	MB	FALSE
chr1	31532483	-	0	1	1	0	0	0	1	APB	FALSE
chr1	31742105	-	1	1	1	0	0	1	0	UAPM	FALSE
chr1	31744346	-	0	0	0	0	0	0	0		FALSE
chr1	31754368	-	1	1	1	1	1	1	1	UAPRSMB	TRUE
chr1	31762301	-	1	1	1	1	1	1	1	UAPRSMB	TRUE
chr1	31762315	-	1	0	1	0	0	0	1	UPB	FALSE
chr1	31764874	-	1	1	1	0	0	0	0	UAP	FALSE
chr1	31766216	-	1	0	1	1	1	1	1	UPRSMB	TRUE
chr1	32096354	-	1	0	0	0	0	0	1	UB	FALSE
chr1	32096364	-	1	1	0	0	0	1	1	UAMB	FALSE
chr1	32096487	-	1	1	1	1	1	1	1	UAPRSMB	TRUE
chr1	32098264	-	0	0	1	1	0	0	0	PR	FALSE
chr1	32098270	-	0	0	1	1	0	0	0	PR	FALSE
chr1	32098273	-	0	1	1	0	0	1	0	APM	FALSE
chr1	32098274	-	0	1	1	0	0	1	0	APM	FALSE
chr1	32098939	-	1	1	1	0	0	1	0	UAPM	FALSE
chr1	32098967	-	1	1	1	0	0	1	0	UAPM	FALSE
chr1	32101121	-	1	0	0	0	0	0	0	U	FALSE
chr1	32118477	-	0	0	1	1	1	1	1	PRSMB	FALSE
chr1	32118478	-	0	0	1	0	0	0	1	PB	FALSE
chr1	32118483	-	1	1	1	1	1	1	1	UAPRSMB	TRUE
chr1	32118497	-	1	1	1	0	0	1	1	UAPMB	FALSE
chr1	32121153	-	0	0	1	0	0	0	1	PB	FALSE
chr1	32122692	-	1	0	1	1	1	0	1	UPRSB	TRUE
chr1	32126265	-	1	1	1	1	1	0	1	UAPRSB	TRUE
chr1	32126271	-	0	1	1	1	1	1	1	APRSMB	FALSE
chr1	32126291	-	0	0	1	0	0	0	1	PB	FALSE
chr1	32128301	-	1	1	1	1	1	1	1	UAPRSMB	TRUE
chr1	32131238	-	1	0	1	1	1	0	1	UPRSB	TRUE
chr1	32131537	-	0	1	0	1	1	0	1	ARSB	FALSE
chr1	32131704	-	1	1	1	0	0	1	1	UAPMB	FALSE
chr1	32133844	-	1	0	1	0	0	1	1	UPMB	FALSE
chr1	32148630	-	0	0	1	0	0	0	1	PB	FALSE
chr1	32148986	-	1	0	1	1	1	0	1	UPRSB	TRUE
chr1	32148990	-	1	0	1	0	0	0	1	UPB	FALSE
chr1	32150253	-	1	0	1	1	1	1	1	UPRSMB	TRUE
chr1	32154127	-	1	1	1	1	1	1	1	UAPRSMB	TRUE
chr1	32154148	-	0	0	1	0	0	0	1	PB	FALSE
chr1	32154153	-	0	0	1	0	0	0	1	PB	FALSE
chr1	32155474	-	0	1	1	0	0	1	1	APMB	FALSE
chr1	32156200	-	0	0	1	0	0	0	1	PB	FALSE
chr1	32157698	-	0	1	1	0	0	1	1	APMB	FALSE
chr1	32158198	-	0	0	0	0	0	0	1	B	FALSE
chr1	32158779	-	1	0	1	0	0	1	1	UPMB	FALSE
chr1	32159794	-	0	1	1	0	0	0	1	APB	FALSE
chr1	32161409	-	0	1	1	0	0	1	1	APMB	FALSE
chr1	32161770	-	0	1	1	0	0	1	1	APMB	FALSE
chr1	32161772	-	0	0	1	0	0	0	1	PB	FALSE
chr1	32162929	-	0	1	1	0	0	0	1	APB	FALSE
chr1	32167854	-	0	0	1	1	1	0	1	PRSB	FALSE
chr1	32194665	-	0	0	0	0	0	0	1	B	FALSE
chr1	32197173	-	0	0	0	0	0	0	1	B	FALSE
chr1	32197799	-	0	1	1	0	0	0	1	APB	FALSE
chr1	32198234	-	0	1	1	0	0	0	0	AP	FALSE
chr1	32198269	-	1	0	1	0	0	1	1	UPMB	FALSE
chr1	32203377	-	1	1	1	0	0	1	1	UAPMB	FALSE
chr1	32204558	-	1	1	1	0	0	1	1	UAPMB	FALSE
chr1	32256870	-	0	0	1	1	1	0	1	PRSB	FALSE
chr1	32256873	-	1	0	1	1	1	0	1	UPRSB	TRUE
chr1	32256877	-	1	0	1	1	1	0	1	UPRSB	TRUE
chr1	32256899	-	0	0	0	0	0	0	1	B	FALSE
chr1	32374561	-	0	0	0	0	0	0	0		FALSE
chr1	32381612	-	1	1	1	1	1	1	0	UAPRSM	TRUE
chr1	32681414	-	1	0	1	1	0	1	0	UPRM	FALSE
chr1	32681420	-	1	0	1	1	1	1	1	UPRSMB	TRUE
chr1	32682590	-	0	1	1	0	0	1	1	APMB	FALSE
chr1	32686821	-	1	1	1	0	0	0	0	UAP	FALSE
chr1	32700735	-	0	0	1	0	0	0	1	PB	FALSE
chr1	32706477	-	0	1	0	0	0	1	0	AM	FALSE
chr1	32832290	-	1	0	1	0	0	1	1	UPMB	FALSE
chr1	32832295	-	1	1	1	1	1	1	1	UAPRSMB	TRUE
chr1	32833110	-	0	0	0	0	0	0	1	B	FALSE
chr1	32834172	-	1	1	1	0	0	1	0	UAPM	FALSE
chr1	32842372	-	0	0	1	1	1	0	0	PRS	FALSE
chr1	32844464	-	1	1	1	1	1	1	1	UAPRSMB	TRUE
chr1	32846903	-	0	1	1	0	0	0	0	AP	FALSE
chr1	32849619	-	1	0	1	1	1	0	1	UPRSB	TRUE
chr1	32849622	-	0	0	1	0	0	0	1	PB	FALSE
chr1	32849641	-	1	0	1	0	0	0	1	UPB	FALSE
chr1	32859761	-	0	1	1	0	0	0	1	APB	FALSE
chr1	32859762	-	0	0	1	1	1	1	1	PRSMB	FALSE
chr1	32859763	-	1	0	1	1	1	1	1	UPRSMB	TRUE
chr1	33093170	-	1	1	1	0	0	1	0	UAPM	FALSE
chr1	33099332	-	1	0	0	0	0	0	1	UB	FALSE
chr1	33100420	-	0	0	1	0	0	0	1	PB	FALSE
chr1	33245151	-	0	1	1	1	0	0	0	APR	FALSE
chr1	33245902	-	0	0	1	1	1	0	0	PRS	FALSE
chr1	33246746	-	0	0	0	0	0	0	1	B	FALSE
chr1	33246767	-	0	1	1	0	0	1	0	APM	FALSE
chr1	33248162	-	0	0	1	0	0	1	1	PMB	FALSE
chr1	33252015	-	0	0	0	0	0	0	1	B	FALSE
chr1	33252051	-	1	1	0	0	0	0	1	UAB	FALSE
chr1	33252640	-	0	0	0	0	0	0	1	B	FALSE
chr1	33252693	-	0	0	1	0	0	1	0	PM	FALSE
chr1	33263263	-	0	0	0	0	0	0	1	B	FALSE
chr1	33263265	-	0	1	0	1	0	0	0	AR	FALSE
chr1	33263266	-	0	0	0	0	0	0	1	B	FALSE
chr1	33412268	-	0	0	0	0	0	1	1	MB	FALSE
chr1	33476491	-	1	1	1	0	0	0	1	UAPB	FALSE
chr1	33480216	-	0	1	1	1	1	1	1	APRSMB	FALSE
chr1	33790646	-	1	1	1	0	0	0	0	UAP	FALSE
chr1	33795839	-	0	1	1	0	0	1	1	APMB	FALSE
chr1	33797089	-	0	0	1	0	0	0	1	PB	FALSE
chr1	33797095	-	1	1	1	1	0	1	0	UAPRM	FALSE
chr1	33797261	-	0	1	0	0	0	0	1	AB	FALSE
chr1	33820201	-	0	0	1	0	0	0	1	PB	FALSE
chr1	33833049	-	0	0	1	1	1	0	1	PRSB	FALSE
chr1	33833050	-	0	0	1	1	1	0	1	PRSB	FALSE
chr1	34189959	-	1	0	1	1	1	0	1	UPRSB	TRUE
chr1	35324353	-	0	0	0	0	0	0	1	B	FALSE
chr1	35470903	-	1	1	1	0	0	1	1	UAPMB	FALSE
chr1	35477603	-	0	0	0	0	0	1	1	MB	FALSE
chr1	35477645	-	0	0	1	0	0	0	1	PB	FALSE
chr1	35478201	-	1	1	1	0	0	1	0	UAPM	FALSE
chr1	35642089	-	1	1	1	1	1	1	1	UAPRSMB	TRUE
chr1	35642092	-	1	1	1	1	1	1	1	UAPRSMB	TRUE
chr1	35642096	-	0	1	1	1	1	0	1	APRSB	FALSE
chr1	35642097	-	0	0	1	0	0	1	1	PMB	FALSE
chr1	35642102	-	0	0	1	0	0	0	1	PB	FALSE
chr1	35642119	-	1	1	1	0	0	1	1	UAPMB	FALSE
chr1	35642123	-	0	0	1	1	1	0	1	PRSB	FALSE
chr1	35642151	-	0	1	0	1	1	0	1	ARSB	FALSE
chr1	35642155	-	0	0	0	0	0	0	1	B	FALSE
chr1	35643021	-	0	1	1	0	0	0	1	APB	FALSE
chr1	35650194	-	0	0	0	0	0	0	1	B	FALSE
chr1	35650327	-	1	0	0	1	1	0	0	URS	FALSE
chr1	35650330	-	0	0	0	1	1	1	1	RSMB	FALSE
chr1	35650331	-	1	0	0	1	1	0	1	URSB	FALSE
chr1	35650334	-	0	0	0	1	1	1	0	RSM	FALSE
chr1	35650335	-	0	0	0	1	1	1	1	RSMB	FALSE
chr1	35650336	-	0	0	0	1	1	0	0	RS	FALSE
chr1	35650338	-	0	0	0	0	0	1	0	M	FALSE
chr1	35650342	-	1	0	0	0	0	0	1	UB	FALSE
chr1	35650348	-	0	1	0	0	0	0	0	A	FALSE
chr1	35650356	-	1	1	0	1	1	1	1	UARSMB	FALSE
chr1	35650365	-	0	0	0	1	1	0	1	RSB	FALSE
chr1	35652872	-	1	1	1	0	0	1	0	UAPM	FALSE
chr1	35652876	-	0	1	1	1	0	1	0	APRM	FALSE
chr1	35653691	-	0	0	0	0	0	0	0		FALSE
chr1	35654984	-	0	1	0	0	0	0	1	AB	FALSE
chr1	35655007	-	0	1	1	1	1	1	0	APRSM	FALSE
chr1	35655015	-	0	1	1	0	0	1	0	APM	FALSE
chr1	35655128	-	1	0	0	0	0	0	1	UB	FALSE
chr1	35655577	-	0	1	0	0	0	0	1	AB	FALSE
chr1	35656596	-	0	0	0	1	1	0	1	RSB	FALSE
chr1	35657123	-	0	1	0	1	0	1	0	ARM	FALSE
chr1	35657153	-	0	1	1	1	1	1	1	APRSMB	FALSE
chr1	35657154	-	0	0	1	0	0	1	0	PM	FALSE
chr1	35657157	-	1	0	1	1	1	0	1	UPRSB	TRUE
chr1	35906765	-	1	1	1	0	0	0	0	UAP	FALSE
chr1	35916139	-	1	1	1	1	0	1	0	UAPRM	FALSE
chr1	35917399	-	1	0	0	1	1	1	1	URSMB	FALSE
chr1	35920104	-	1	0	1	0	0	1	1	UPMB	FALSE
chr1	35920109	-	0	0	1	0	0	0	1	PB	FALSE
chr1	35926068	-	1	1	1	1	1	1	0	UAPRSM	TRUE
chr1	35928350	-	0	0	1	1	0	0	0	PR	FALSE
chr1	36069001	-	1	1	1	1	1	0	1	UAPRSB	TRUE
chr1	36074873	-	0	1	0	0	0	0	1	AB	FALSE
chr1	36075036	-	1	1	1	1	0	1	0	UAPRM	FALSE
chr1	36096965	-	1	1	1	0	0	1	1	UAPMB	FALSE
chr1	36097036	-	0	0	0	0	0	1	1	MB	FALSE
chr1	36102055	-	1	1	1	0	0	1	0	UAPM	FALSE
chr1	36202210	-	1	0	0	0	0	0	0	U	FALSE
chr1	36202226	-	1	1	1	1	1	1	1	UAPRSMB	TRUE
chr1	36202696	-	0	1	1	0	0	1	0	APM	FALSE
chr1	36203043	-	0	0	1	0	0	0	1	PB	FALSE
chr1	36203046	-	0	1	1	0	0	1	0	APM	FALSE
chr1	36204204	-	1	1	1	0	0	0	0	UAP	FALSE
chr1	36213507	-	0	0	0	0	0	0	1	B	FALSE
chr1	36213516	-	1	1	0	0	0	0	1	UAB	FALSE
chr1	36215450	-	1	1	1	0	0	1	0	UAPM	FALSE
chr1	36602942	-	0	0	1	1	1	1	1	PRSMB	FALSE
chr1	36602948	-	1	0	1	1	1	0	1	UPRSB	TRUE
chr1	36602949	-	1	0	1	1	1	1	1	UPRSMB	TRUE
chr1	36602952	-	0	0	1	0	0	0	1	PB	FALSE
chr1	36602958	-	0	1	1	0	0	1	1	APMB	FALSE
chr1	36603605	-	0	1	1	1	1	1	1	APRSMB	FALSE
chr1	36603609	-	0	0	1	1	1	1	1	PRSMB	FALSE
chr1	36603705	-	0	0	0	0	0	0	1	B	FALSE
chr1	36605445	-	0	1	0	0	0	0	1	AB	FALSE
chr1	36807599	-	0	0	1	0	0	1	1	PMB	FALSE
chr1	36807605	-	1	0	1	0	0	1	0	UPM	FALSE
chr1	36807618	-	0	1	1	1	1	1	1	APRSMB	FALSE
chr1	36807620	-	0	0	1	0	0	0	1	PB	FALSE
chr1	36809049	-	0	0	0	1	1	0	1	RSB	FALSE
chr1	36809068	-	1	1	1	0	0	0	0	UAP	FALSE
chr1	36820048	-	1	1	1	0	0	1	1	UAPMB	FALSE
chr1	36823983	-	0	0	0	0	0	0	1	B	FALSE
chr1	36824001	-	1	0	1	0	0	0	1	UPB	FALSE
chr1	36921995	-	0	1	1	0	0	0	1	APB	FALSE
chr1	36923297	-	0	1	0	0	0	0	1	AB	FALSE
chr1	36923605	-	0	1	1	0	0	1	1	APMB	FALSE
chr1	36926402	-	0	1	1	0	0	0	1	APB	FALSE
chr1	36926404	-	0	1	1	1	1	1	1	APRSMB	FALSE
chr1	36931830	-	0	1	1	0	0	1	1	APMB	FALSE
chr1	36941298	-	0	0	1	0	0	0	1	PB	FALSE
chr1	36941382	-	0	0	0	0	0	0	1	B	FALSE
chr1	36941552	-	0	1	0	1	1	0	1	ARSB	FALSE
chr1	37959437	-	1	1	1	0	0	1	1	UAPMB	FALSE
chr1	37962375	-	1	1	1	0	0	1	1	UAPMB	FALSE
chr1	37967626	-	1	1	1	1	0	1	0	UAPRM	FALSE
chr1	38032631	-	1	1	1	1	1	1	0	UAPRSM	TRUE
chr1	38033976	-	1	0	1	1	1	1	1	UPRSMB	TRUE
chr1	38033980	-	1	0	1	1	1	1	0	UPRSM	TRUE
chr1	38033985	-	0	0	1	0	0	0	1	PB	FALSE
chr1	38033986	-	0	1	1	0	0	1	0	APM	FALSE
chr1	38033989	-	0	1	1	0	0	0	0	AP	FALSE
chr1	38034008	-	0	0	1	0	0	0	1	PB	FALSE
chr1	38040083	-	1	1	1	1	1	1	1	UAPRSMB	TRUE
chr1	38040450	-	0	1	1	0	0	0	0	AP	FALSE
chr1	38040451	-	0	1	1	0	0	0	1	APB	FALSE
chr1	38040707	-	0	1	0	0	0	0	1	AB	FALSE
chr1	38042188	-	0	1	1	1	1	1	0	APRSM	FALSE
chr1	38042193	-	1	1	1	0	0	0	0	UAP	FALSE
chr1	38047961	-	0	1	1	0	0	1	0	APM	FALSE
chr1	38047964	-	0	1	1	0	0	1	0	APM	FALSE
chr1	38047969	-	0	1	1	1	1	1	0	APRSM	FALSE
chr1	38047974	-	1	1	1	0	0	1	0	UAPM	FALSE
chr1	38057852	-	0	1	0	0	0	0	1	AB	FALSE
chr1	38058220	-	0	0	0	1	1	0	0	RS	FALSE
chr1	38059471	-	1	0	1	0	0	1	0	UPM	FALSE
chr1	38148860	-	1	1	1	0	0	1	0	UAPM	FALSE
chr1	38185307	-	0	0	1	0	0	0	1	PB	FALSE
chr1	38269702	-	0	1	1	0	0	0	1	APB	FALSE
chr1	38269828	-	0	1	0	0	0	0	0	A	FALSE
chr1	38281266	-	0	1	1	0	0	0	0	AP	FALSE
chr1	38288391	-	1	0	0	0	0	1	1	UMB	FALSE
chr1	38288413	-	0	1	1	0	0	1	0	APM	FALSE
chr1	38288415	-	1	1	1	0	0	1	0	UAPM	FALSE
chr1	38323383	-	1	0	0	0	0	0	0	U	FALSE
chr1	38323401	-	1	0	1	0	0	0	0	UP	FALSE
chr1	38334306	-	0	1	1	0	0	1	0	APM	FALSE
chr1	38339983	-	0	1	0	0	0	0	1	AB	FALSE
chr1	38340053	-	0	0	0	0	0	0	1	B	FALSE
chr1	38344015	-	0	1	1	1	1	1	0	APRSM	FALSE
chr1	38344017	-	1	0	1	1	1	0	0	UPRS	TRUE
chr1	38344189	-	0	1	1	1	1	1	0	APRSM	FALSE
chr1	38345910	-	1	1	1	0	0	1	1	UAPMB	FALSE
chr1	38352702	-	0	1	1	0	0	1	1	APMB	FALSE
chr1	38354036	-	1	1	1	0	0	1	0	UAPM	FALSE
chr1	38406295	-	0	0	0	0	0	0	1	B	FALSE
chr1	38411535	-	1	1	1	1	1	1	1	UAPRSMB	TRUE
chr1	38411541	-	0	0	1	0	0	0	1	PB	FALSE
chr1	38412033	-	0	1	1	0	0	1	0	APM	FALSE
chr1	38412035	-	0	1	1	0	0	0	1	APB	FALSE
chr1	38423959	-	0	1	1	1	1	1	0	APRSM	FALSE
chr1	38423961	-	0	0	1	1	1	0	0	PRS	FALSE
chr1	38433935	-	0	0	0	0	0	0	1	B	FALSE
chr1	38433936	-	0	1	0	0	0	0	1	AB	FALSE
chr1	38433952	-	1	0	0	0	0	0	1	UB	FALSE
chr1	38433984	-	1	1	0	0	0	0	1	UAB	FALSE
chr1	38434922	-	0	0	0	1	1	0	0	RS	FALSE
chr1	38444755	-	1	1	1	0	0	1	1	UAPMB	FALSE
chr1	38444909	-	0	1	0	0	0	0	1	AB	FALSE
chr1	38446414	-	1	1	1	0	0	1	0	UAPM	FALSE
chr1	38449930	-	0	0	0	0	0	1	0	M	FALSE
chr1	38449932	-	0	0	0	1	1	0	0	RS	FALSE
chr1	38449954	-	0	1	1	1	1	1	1	APRSMB	FALSE
chr1	38449956	-	0	0	1	0	0	0	0	P	FALSE
chr1	38450471	-	1	1	1	0	0	0	0	UAP	FALSE
chr1	38450475	-	0	0	1	0	0	0	1	PB	FALSE
chr1	38453391	-	1	1	1	1	0	0	0	UAPR	FALSE
chr1	38453530	-	1	1	1	0	0	1	1	UAPMB	FALSE
chr1	38465131	-	1	0	1	1	0	1	0	UPRM	FALSE
chr1	39332681	-	0	0	0	1	1	0	1	RSB	FALSE
chr1	39332693	-	1	1	0	0	0	0	0	UA	FALSE
chr1	40026818	-	1	0	1	1	1	1	1	UPRSMB	TRUE
chr1	40027476	-	0	0	1	1	0	0	0	PR	FALSE
chr1	40027477	-	0	1	1	1	1	1	1	APRSMB	FALSE
chr1	40027478	-	0	0	1	1	1	0	1	PRSB	FALSE
chr1	40027480	-	1	1	1	1	1	1	1	UAPRSMB	TRUE
chr1	40029435	-	1	1	1	0	0	1	1	UAPMB	FALSE
chr1	40029445	-	1	1	1	0	0	1	0	UAPM	FALSE
chr1	40029612	-	1	1	1	0	0	1	1	UAPMB	FALSE
chr1	40029618	-	1	1	1	1	1	1	1	UAPRSMB	TRUE
chr1	40029619	-	0	0	1	1	0	1	0	PRM	FALSE
chr1	40030244	-	0	0	1	1	1	1	1	PRSMB	FALSE
chr1	40030245	-	0	0	1	1	0	0	0	PR	FALSE
chr1	40030248	-	0	1	1	0	0	1	1	APMB	FALSE
chr1	40030476	-	0	1	1	1	0	1	0	APRM	FALSE
chr1	40030477	-	0	1	1	1	1	1	1	APRSMB	FALSE
chr1	40033538	-	1	1	1	0	0	0	1	UAPB	FALSE
chr1	40034638	-	0	1	1	0	0	1	0	APM	FALSE
chr1	40035383	-	1	1	1	1	1	0	1	UAPRSB	TRUE
chr1	40035672	-	1	1	0	1	0	0	0	UAR	FALSE
chr1	40035704	-	0	0	1	0	0	1	1	PMB	FALSE
chr1	40037045	-	1	1	1	1	0	1	0	UAPRM	FALSE
chr1	40038257	-	1	0	0	0	0	0	0	U	FALSE
chr1	40309911	-	1	0	1	1	1	0	1	UPRSB	TRUE
chr1	40309917	-	1	1	1	1	1	1	1	UAPRSMB	TRUE
chr1	40309918	-	1	1	1	1	1	1	1	UAPRSMB	TRUE
chr1	40310337	-	0	0	1	0	0	0	1	PB	FALSE
chr1	40312985	-	1	1	1	0	0	1	1	UAPMB	FALSE
chr1	40313002	-	1	1	1	1	1	1	1	UAPRSMB	TRUE
chr1	40313009	-	0	1	1	0	0	0	1	APB	FALSE
chr1	40313349	-	1	1	1	1	1	0	1	UAPRSB	TRUE
chr1	40313550	-	1	0	0	0	0	1	0	UM	FALSE
chr1	40313788	-	0	1	1	1	1	1	1	APRSMB	FALSE
chr1	40313789	-	0	0	1	0	0	0	1	PB	FALSE
chr1	40313818	-	0	1	1	0	0	0	1	APB	FALSE
chr1	40318619	-	0	0	0	0	0	0	0		FALSE
chr1	40319760	-	0	0	1	1	1	0	1	PRSB	FALSE
chr1	40319768	-	0	0	1	1	1	0	1	PRSB	FALSE
chr1	40367137	-	0	1	1	1	0	1	0	APRM	FALSE
chr1	40776008	-	1	0	1	1	1	0	1	UPRSB	TRUE
chr1	41485807	-	0	0	0	0	0	0	1	B	FALSE
chr1	41494033	-	1	1	1	1	1	1	0	UAPRSM	TRUE
chr1	41494423	-	0	1	1	0	0	0	0	AP	FALSE
chr1	41536266	-	0	0	0	0	0	0	1	B	FALSE
chr1	41579229	-	0	0	1	1	0	0	0	PR	FALSE
chr1	41608811	-	1	0	1	1	0	0	0	UPR	FALSE
chr1	41626596	-	0	1	1	1	0	1	0	APRM	FALSE
chr1	42654599	-	0	0	0	0	0	0	1	B	FALSE
chr1	42654624	-	1	1	1	1	1	1	1	UAPRSMB	TRUE
chr1	42656511	-	0	0	0	0	0	0	1	B	FALSE
chr1	42660735	-	0	0	0	0	0	0	1	B	FALSE
chr1	42660826	-	0	0	0	0	0	0	1	B	FALSE
chr1	42789180	-	0	0	0	0	0	0	1	B	FALSE
chr1	43213492	-	0	1	1	0	0	0	0	AP	FALSE
chr1	43214009	-	1	1	1	0	0	1	1	UAPMB	FALSE
chr1	43217848	-	0	0	0	0	0	0	1	B	FALSE
chr1	43220970	-	0	0	0	0	0	0	1	B	FALSE
chr1	43223366	-	0	0	0	0	0	0	1	B	FALSE
chr1	43224678	-	1	1	1	0	0	1	0	UAPM	FALSE
chr1	43224684	-	0	1	1	0	0	1	1	APMB	FALSE
chr1	43273197	-	1	1	1	0	0	1	0	UAPM	FALSE
chr1	43393508	-	1	1	1	0	0	1	0	UAPM	FALSE
chr1	43395006	-	0	1	1	1	1	0	1	APRSB	FALSE
chr1	43396083	-	1	1	0	0	0	1	1	UAMB	FALSE
chr1	43396901	-	1	1	1	0	0	1	1	UAPMB	FALSE
chr1	43630499	-	1	1	1	0	0	1	1	UAPMB	FALSE
chr1	43632614	-	1	1	1	1	0	1	0	UAPRM	FALSE
chr1	43636679	-	0	0	0	0	0	0	1	B	FALSE
chr1	43637339	-	1	1	1	0	0	1	0	UAPM	FALSE
chr1	43637897	-	0	1	0	0	0	0	1	AB	FALSE
chr1	43829380	-	0	0	0	0	0	0	1	B	FALSE
chr1	43830155	-	1	1	1	0	0	0	1	UAPB	FALSE
chr1	43831069	-	1	1	1	1	1	1	1	UAPRSMB	TRUE
chr1	43831074	-	0	0	1	0	0	0	1	PB	FALSE
chr1	43831103	-	0	1	1	0	0	0	1	APB	FALSE
chr1	43831829	-	0	0	0	0	0	0	1	B	FALSE
chr1	43850716	-	0	0	0	0	0	0	1	B	FALSE
chr1	43851921	-	0	1	1	1	1	1	1	APRSMB	FALSE
chr1	43852091	-	0	0	0	0	0	0	1	B	FALSE
chr1	43852223	-	0	0	0	1	1	0	0	RS	FALSE
chr1	43852692	-	0	1	1	1	0	1	0	APRM	FALSE
chr1	43917454	-	0	0	0	0	0	0	1	B	FALSE
chr1	44170158	-	1	1	1	0	0	1	1	UAPMB	FALSE
chr1	44774073	-	0	0	0	0	0	0	0		FALSE
chr1	44774095	-	1	1	1	1	1	1	0	UAPRSM	TRUE
chr1	44818618	-	0	1	1	0	0	1	1	APMB	FALSE
chr1	45323311	-	0	0	0	1	0	0	0	R	FALSE
chr1	45340498	-	0	0	0	0	0	0	0		FALSE
chr1	45340525	-	0	1	1	0	0	0	0	AP	FALSE
chr1	45345712	-	1	1	1	0	0	1	1	UAPMB	FALSE
chr1	45470454	-	0	1	0	0	0	0	1	AB	FALSE
chr1	45470500	-	0	0	1	0	0	0	1	PB	FALSE
chr1	45471571	-	0	0	1	1	0	0	0	PR	FALSE
chr1	45471808	-	1	1	1	0	0	0	0	UAP	FALSE
chr1	45474017	-	1	0	1	0	0	1	1	UPMB	FALSE
chr1	45474921	-	1	1	1	1	1	1	1	UAPRSMB	TRUE
chr1	45474931	-	0	1	1	0	0	0	1	APB	FALSE
chr1	45474968	-	0	1	0	1	0	0	0	AR	FALSE
chr1	45475394	-	0	0	1	0	0	0	1	PB	FALSE
chr1	45796250	-	0	1	1	1	1	1	1	APRSMB	FALSE
chr1	45797549	-	0	0	1	0	0	1	0	PM	FALSE
chr1	45798004	-	1	1	1	1	1	1	1	UAPRSMB	TRUE
chr1	45798661	-	1	0	1	1	0	0	1	UPRB	FALSE
chr1	45812734	-	0	0	0	0	0	0	1	B	FALSE
chr1	45960873	-	1	1	1	1	1	1	1	UAPRSMB	TRUE
chr1	45977109	-	1	1	1	0	0	0	0	UAP	FALSE
chr1	45980322	-	0	1	1	0	0	0	1	APB	FALSE
chr1	45980344	-	1	1	1	0	0	1	0	UAPM	FALSE
chr1	45984746	-	1	1	1	0	0	1	0	UAPM	FALSE
chr1	46086809	-	1	1	1	0	0	1	1	UAPMB	FALSE
chr1	46094120	-	1	1	1	0	0	1	0	UAPM	FALSE
chr1	46095376	-	1	0	1	1	1	1	1	UPRSMB	TRUE
chr1	46095381	-	1	1	1	1	1	1	1	UAPRSMB	TRUE
chr1	46095388	-	1	1	1	1	1	1	1	UAPRSMB	TRUE
chr1	46095392	-	1	1	1	0	0	1	0	UAPM	FALSE
chr1	46099936	-	0	0	1	0	0	0	0	P	FALSE
chr1	46106109	-	1	1	1	1	0	1	0	UAPRM	FALSE
chr1	46121033	-	0	1	1	0	0	1	1	APMB	FALSE
chr1	46121035	-	0	0	1	0	0	0	1	PB	FALSE
chr1	46124814	-	0	0	0	0	0	0	1	B	FALSE
chr1	46124835	-	0	1	1	1	1	1	1	APRSMB	FALSE
chr1	46124844	-	1	1	1	0	0	0	0	UAP	FALSE
chr1	46124849	-	0	0	1	1	1	0	1	PRSB	FALSE
chr1	46151319	-	1	1	1	1	1	1	1	UAPRSMB	TRUE
chr1	46151895	-	0	0	0	0	0	1	0	M	FALSE
chr1	46182708	-	0	1	1	0	0	0	1	APB	FALSE
chr1	46193496	-	1	1	1	0	0	1	0	UAPM	FALSE
chr1	46195465	-	1	1	1	0	0	1	0	UAPM	FALSE
chr1	46654840	-	1	0	0	1	1	0	1	URSB	FALSE
chr1	46655272	-	1	1	1	0	0	1	1	UAPMB	FALSE
chr1	46656480	-	1	1	1	0	0	0	1	UAPB	FALSE
chr1	46657979	-	0	0	0	0	0	0	1	B	FALSE
chr1	46658217	-	0	0	0	0	0	0	1	B	FALSE
chr1	46658286	-	1	1	1	0	0	1	0	UAPM	FALSE
chr1	46660091	-	0	1	1	0	0	1	1	APMB	FALSE
chr1	46662778	-	1	1	1	0	0	1	1	UAPMB	FALSE
chr1	46744215	-	0	0	0	0	0	0	1	B	FALSE
chr1	46745286	-	0	0	0	0	0	0	1	B	FALSE
chr1	46746048	-	0	0	0	0	0	0	1	B	FALSE
chr1	46746256	-	0	1	1	0	0	1	1	APMB	FALSE
chr1	46746342	-	0	1	0	0	0	0	1	AB	FALSE
chr1	46763329	-	0	0	1	0	0	0	1	PB	FALSE
chr1	46763331	-	0	1	1	1	0	1	0	APRM	FALSE
chr1	46763333	-	1	0	1	1	1	0	1	UPRSB	TRUE
chr1	47025972	-	0	1	1	0	0	0	1	APB	FALSE
chr1	47059979	-	1	1	1	0	0	0	0	UAP	FALSE
chr1	47130678	-	0	0	0	0	0	0	1	B	FALSE
chr1	47149095	-	1	0	0	0	0	0	0	U	FALSE
chr1	47149099	-	1	0	0	0	0	0	1	UB	FALSE
chr1	47152581	-	1	1	1	0	0	0	1	UAPB	FALSE
chr1	47152616	-	0	1	0	1	1	0	1	ARSB	FALSE
chr1	47153558	-	0	0	0	0	0	0	1	B	FALSE
chr1	47154235	-	1	0	1	1	1	1	1	UPRSMB	TRUE
chr1	47154245	-	0	1	1	0	0	1	1	APMB	FALSE
chr1	47155388	-	0	1	1	1	1	1	1	APRSMB	FALSE
chr1	47162187	-	0	0	0	1	1	0	0	RS	FALSE
chr1	47162356	-	1	1	1	0	0	1	0	UAPM	FALSE
chr1	47182115	-	0	0	0	0	0	0	0		FALSE
chr1	47694547	-	1	1	0	0	0	0	1	UAB	FALSE
chr1	47746908	-	1	0	1	0	0	1	0	UPM	FALSE
chr1	47753332	-	0	0	0	0	0	0	0		FALSE
chr1	47765635	-	0	0	0	0	0	0	1	B	FALSE
chr1	47779624	-	1	0	0	1	0	0	0	UR	FALSE
chr1	51004684	-	0	0	0	0	0	0	1	B	FALSE
chr1	51049421	-	1	0	1	1	1	0	1	UPRSB	TRUE
chr1	51049454	-	1	0	0	0	0	0	1	UB	FALSE
chr1	51049471	-	0	0	0	0	0	0	1	B	FALSE
chr1	51121103	-	0	1	0	0	0	0	1	AB	FALSE
chr1	51171497	-	0	1	0	1	0	0	0	AR	FALSE
chr1	51323692	-	1	1	1	0	0	1	1	UAPMB	FALSE
chr1	51425346	-	0	1	0	0	0	0	1	AB	FALSE
chr1	51822549	-	1	1	1	0	0	0	1	UAPB	FALSE
chr1	51827027	-	0	0	0	0	0	0	1	B	FALSE
chr1	51827047	-	1	1	1	1	1	1	1	UAPRSMB	TRUE
chr1	51864859	-	0	1	1	0	0	1	1	APMB	FALSE
chr1	51866664	-	1	1	1	0	0	1	1	UAPMB	FALSE
chr1	51866665	-	1	1	1	0	0	1	0	UAPM	FALSE
chr1	51910967	-	0	0	0	0	0	0	1	B	FALSE
chr1	51912949	-	0	0	0	0	0	0	1	B	FALSE
chr1	51912958	-	1	0	0	0	0	0	1	UB	FALSE
chr1	51929499	-	1	0	1	0	0	0	1	UPB	FALSE
chr1	51937409	-	0	0	0	0	0	0	0		FALSE
chr1	51937430	-	1	1	1	1	1	1	1	UAPRSMB	TRUE
chr1	51938639	-	0	1	1	0	0	1	0	APM	FALSE
chr1	52255105	-	0	0	0	1	1	0	1	RSB	FALSE
chr1	52255364	-	0	0	1	0	0	1	1	PMB	FALSE
chr1	52255372	-	1	0	1	0	0	1	1	UPMB	FALSE
chr1	52256343	-	0	1	1	1	0	0	0	APR	FALSE
chr1	52256351	-	0	1	1	1	1	1	0	APRSM	FALSE
chr1	52256682	-	1	1	1	0	0	1	1	UAPMB	FALSE
chr1	52257353	-	1	1	1	0	0	1	0	UAPM	FALSE
chr1	52257358	-	1	1	1	1	1	1	1	UAPRSMB	TRUE
chr1	52257770	-	0	0	0	1	1	0	0	RS	FALSE
chr1	52258113	-	1	1	1	1	1	1	1	UAPRSMB	TRUE
chr1	52258142	-	0	0	1	0	0	0	1	PB	FALSE
chr1	52260281	-	1	0	0	0	0	0	0	U	FALSE
chr1	52260298	-	0	0	1	1	0	0	0	PR	FALSE
chr1	52260299	-	0	1	1	1	1	1	1	APRSMB	FALSE
chr1	52272609	-	1	1	1	0	0	0	0	UAP	FALSE
chr1	52272615	-	0	0	1	1	0	0	0	PR	FALSE
chr1	52275097	-	1	0	1	1	1	1	1	UPRSMB	TRUE
chr1	52275102	-	1	1	1	1	1	0	1	UAPRSB	TRUE
chr1	52276115	-	1	1	1	0	0	1	1	UAPMB	FALSE
chr1	52279782	-	1	1	1	0	0	1	1	UAPMB	FALSE
chr1	52282081	-	1	1	1	1	1	1	1	UAPRSMB	TRUE
chr1	52282104	-	1	1	1	0	0	1	0	UAPM	FALSE
chr1	52283836	-	1	1	1	1	1	1	1	UAPRSMB	TRUE
chr1	52287271	-	0	1	1	0	0	1	0	APM	FALSE
chr1	52291090	-	1	1	1	1	0	1	0	UAPRM	FALSE
chr1	52301917	-	1	1	1	0	0	1	1	UAPMB	FALSE
chr1	52302133	-	1	0	1	1	1	1	1	UPRSMB	TRUE
chr1	52507288	-	1	1	1	0	0	1	1	UAPMB	FALSE
chr1	52818901	-	0	0	0	0	0	0	1	B	FALSE
chr1	52818922	-	1	1	1	1	1	1	1	UAPRSMB	TRUE
chr1	52819345	-	1	0	1	1	1	1	1	UPRSMB	TRUE
chr1	52820641	-	0	1	1	0	0	1	0	APM	FALSE
chr1	52821121	-	0	0	0	0	0	0	1	B	FALSE
chr1	52821122	-	1	1	0	0	0	0	1	UAB	FALSE
chr1	52821143	-	1	1	1	1	1	1	1	UAPRSMB	TRUE
chr1	52821338	-	0	0	0	1	0	0	1	RB	FALSE
chr1	52821541	-	0	1	1	1	1	1	0	APRSM	FALSE
chr1	52821544	-	1	1	1	0	0	0	0	UAP	FALSE
chr1	52821551	-	0	1	1	1	1	1	1	APRSMB	FALSE
chr1	52822134	-	0	1	1	0	0	1	1	APMB	FALSE
chr1	52822135	-	0	0	1	0	0	0	1	PB	FALSE
chr1	52822138	-	0	1	1	0	0	0	1	APB	FALSE
chr1	52822653	-	0	0	0	0	0	0	1	B	FALSE
chr1	52822798	-	0	0	0	1	1	0	1	RSB	FALSE
chr1	52822801	-	0	0	0	0	0	1	0	M	FALSE
chr1	52823591	-	1	1	0	0	0	0	0	UA	FALSE
chr1	52824154	-	0	0	1	0	0	0	0	P	FALSE
chr1	52824155	-	0	0	1	1	1	0	0	PRS	FALSE
chr1	52824160	-	1	0	1	1	1	1	1	UPRSMB	TRUE
chr1	52824164	-	1	0	1	1	1	0	0	UPRS	TRUE
chr1	52824460	-	0	1	1	0	0	0	1	APB	FALSE
chr1	52825162	-	0	0	0	0	0	0	1	B	FALSE
chr1	52825294	-	0	1	0	0	0	0	1	AB	FALSE
chr1	52825583	-	1	0	1	0	0	0	1	UPB	FALSE
chr1	52825588	-	0	1	1	1	1	1	1	APRSMB	FALSE
chr1	52826232	-	1	1	0	0	0	0	1	UAB	FALSE
chr1	52826237	-	0	1	1	1	1	1	0	APRSM	FALSE
chr1	52826263	-	0	0	1	0	0	0	1	PB	FALSE
chr1	52826827	-	0	0	1	0	0	1	0	PM	FALSE
chr1	52826828	-	0	0	1	1	1	0	1	PRSB	FALSE
chr1	52826829	-	0	0	1	1	1	0	1	PRSB	FALSE
chr1	52826830	-	0	0	1	1	1	1	1	PRSMB	FALSE
chr1	52827311	-	1	0	1	1	1	1	1	UPRSMB	TRUE
chr1	52828451	-	0	0	1	0	0	0	1	PB	FALSE
chr1	52841271	-	0	0	0	0	0	0	0		FALSE
chr1	52849433	-	0	0	0	1	0	0	0	R	FALSE
chr1	52849609	-	0	0	0	1	0	0	0	R	FALSE
chr1	52849632	-	1	1	1	1	1	1	1	UAPRSMB	TRUE
chr1	52850420	-	0	0	1	0	0	0	1	PB	FALSE
chr1	52850421	-	0	1	1	0	0	1	0	APM	FALSE
chr1	52850444	-	1	0	1	0	0	0	1	UPB	FALSE
chr1	52850970	-	0	1	1	0	0	1	1	APMB	FALSE
chr1	52855014	-	1	1	1	1	1	1	0	UAPRSM	TRUE
chr1	52858759	-	1	1	0	0	0	1	0	UAM	FALSE
chr1	52862039	-	0	0	0	1	0	0	0	R	FALSE
chr1	52862070	-	1	1	1	0	0	1	1	UAPMB	FALSE
chr1	52867162	-	0	1	0	0	0	0	0	A	FALSE
chr1	52867556	-	0	0	0	0	0	0	1	B	FALSE
chr1	52867924	-	1	1	1	0	0	1	0	UAPM	FALSE
chr1	52901169	-	1	0	1	0	0	1	0	UPM	FALSE
chr1	52911700	-	1	1	1	1	1	1	0	UAPRSM	TRUE
chr1	52924151	-	1	1	1	0	0	0	1	UAPB	FALSE
chr1	52927472	-	1	1	1	1	0	0	1	UAPRB	FALSE
chr1	52934034	-	0	0	0	0	0	0	1	B	FALSE
chr1	52941226	-	1	1	1	1	0	1	0	UAPRM	FALSE
chr1	52956318	-	1	0	0	0	0	0	0	U	FALSE
chr1	52959334	-	0	0	0	0	0	0	0		FALSE
chr1	52959335	-	0	1	0	0	0	0	1	AB	FALSE
chr1	53153864	-	1	0	1	0	0	1	1	UPMB	FALSE
chr1	53362289	-	1	1	1	1	0	0	0	UAPR	FALSE
chr1	53377477	-	1	0	1	0	0	0	1	UPB	FALSE
chr1	53681752	-	1	1	1	0	0	1	0	UAPM	FALSE
chr1	53682548	-	1	1	1	0	0	1	1	UAPMB	FALSE
chr1	53684192	-	0	0	1	0	0	0	1	PB	FALSE
chr1	53694645	-	0	1	1	1	1	1	1	APRSMB	FALSE
chr1	53694651	-	1	1	1	1	1	1	1	UAPRSMB	TRUE
chr1	53694683	-	0	0	1	0	0	0	1	PB	FALSE
chr1	53699348	-	0	1	1	0	0	1	0	APM	FALSE
chr1	53720856	-	1	1	0	0	0	0	0	UA	FALSE
chr1	53720888	-	0	1	1	0	0	0	0	AP	FALSE
chr1	53726300	-	0	1	1	0	0	1	0	APM	FALSE
chr1	53726303	-	0	0	1	1	1	0	1	PRSB	FALSE
chr1	53726305	-	0	0	1	0	0	0	1	PB	FALSE
chr1	53727897	-	1	1	1	0	0	1	1	UAPMB	FALSE
chr1	53727902	-	1	1	1	0	0	1	1	UAPMB	FALSE
chr1	53727905	-	0	1	1	0	0	0	0	AP	FALSE
chr1	53728257	-	0	1	1	0	0	1	1	APMB	FALSE
chr1	53728258	-	0	1	1	0	0	1	1	APMB	FALSE
chr1	53728259	-	0	1	1	1	1	1	0	APRSM	FALSE
chr1	53732350	-	1	1	1	0	0	0	1	UAPB	FALSE
chr1	53740526	-	0	1	0	0	0	0	1	AB	FALSE
chr1	53792683	-	1	1	1	0	0	1	0	UAPM	FALSE
chr1	53792692	-	1	1	1	0	0	1	0	UAPM	FALSE
chr1	54233746	-	0	0	1	0	0	0	1	PB	FALSE
chr1	54262840	-	1	1	1	0	0	1	0	UAPM	FALSE
chr1	54284780	-	0	0	1	1	1	0	1	PRSB	FALSE
chr1	54301315	-	0	1	1	0	0	1	1	APMB	FALSE
chr1	54332075	-	0	0	1	1	1	0	1	PRSB	FALSE
chr1	54332086	-	0	1	1	1	0	1	0	APRM	FALSE
chr1	54332617	-	1	0	1	0	0	1	1	UPMB	FALSE
chr1	54507499	-	1	1	1	0	0	0	1	UAPB	FALSE
chr1	54640519	-	1	1	1	0	0	0	0	UAP	FALSE
chr1	54640528	-	1	0	1	1	0	0	0	UPR	FALSE
chr1	54656593	-	1	0	1	0	0	1	1	UPMB	FALSE
chr1	54692864	-	1	1	1	0	0	0	0	UAP	FALSE
chr1	54706657	-	0	0	1	0	0	0	0	P	FALSE
chr1	54707211	-	0	1	1	0	0	1	1	APMB	FALSE
chr1	54722886	-	1	0	1	0	0	1	0	UPM	FALSE
chr1	54870310	-	0	0	0	0	0	0	0		FALSE
chr1	55318080	-	1	1	1	1	1	1	0	UAPRSM	TRUE
chr1	55319309	-	0	1	1	1	1	1	1	APRSMB	FALSE
chr1	55331143	-	1	1	1	0	0	0	1	UAPB	FALSE
chr1	55340907	-	1	1	1	1	1	1	1	UAPRSMB	TRUE
chr1	55538101	-	1	1	1	1	1	1	1	UAPRSMB	TRUE
chr1	55543002	-	1	1	1	0	0	0	0	UAP	FALSE
chr1	55544346	-	1	1	1	0	0	1	0	UAPM	FALSE
chr1	55544348	-	0	0	1	1	1	0	1	PRSB	FALSE
chr1	55545386	-	1	0	1	0	0	0	1	UPB	FALSE
chr1	55549063	-	1	0	1	0	0	1	1	UPMB	FALSE
chr1	55549582	-	1	1	1	1	1	1	1	UAPRSMB	TRUE
chr1	55549587	-	1	1	1	0	0	1	1	UAPMB	FALSE
chr1	55549602	-	0	1	1	0	0	1	0	APM	FALSE
chr1	55549603	-	0	0	1	1	0	0	0	PR	FALSE
chr1	55549612	-	0	0	1	0	0	0	1	PB	FALSE
chr1	55557831	-	0	1	1	0	0	0	1	APB	FALSE
chr1	55562337	-	1	1	1	1	1	1	0	UAPRSM	TRUE
chr1	55562879	-	1	1	1	1	0	1	0	UAPRM	FALSE
chr1	55562882	-	1	0	1	0	0	0	0	UP	FALSE
chr1	55563426	-	0	1	1	0	0	1	0	APM	FALSE
chr1	55563786	-	1	1	1	0	0	1	0	UAPM	FALSE
chr1	55564254	-	1	1	1	1	1	0	1	UAPRSB	TRUE
chr1	55565563	-	0	1	1	0	0	0	0	AP	FALSE
chr1	55565567	-	0	1	1	1	1	1	1	APRSMB	FALSE
chr1	55565572	-	0	0	1	0	0	0	1	PB	FALSE
chr1	55565574	-	1	0	1	0	0	0	0	UP	FALSE
chr1	55566664	-	0	1	1	0	0	1	0	APM	FALSE
chr1	55567032	-	0	0	0	1	1	0	1	RSB	FALSE
chr1	55569706	-	1	0	1	0	0	1	0	UPM	FALSE
chr1	55571224	-	1	1	0	0	0	1	1	UAMB	FALSE
chr1	55571961	-	1	1	1	0	0	1	0	UAPM	FALSE
chr1	55586467	-	1	1	1	0	0	1	0	UAPM	FALSE
chr1	55589297	-	1	1	1	0	0	1	1	UAPMB	FALSE
chr1	55590499	-	0	1	0	0	0	0	1	AB	FALSE
chr1	55595268	-	1	1	1	0	0	1	1	UAPMB	FALSE
chr1	55598374	-	0	1	0	0	0	0	1	AB	FALSE
chr1	55598399	-	0	1	1	1	1	1	1	APRSMB	FALSE
chr1	55598407	-	1	1	1	0	0	0	0	UAP	FALSE
chr1	55599837	-	0	1	0	0	0	0	1	AB	FALSE
chr1	55603602	-	0	1	1	0	0	0	0	AP	FALSE
chr1	55604182	-	0	0	0	0	0	0	0		FALSE
chr1	55604413	-	1	1	1	1	0	0	0	UAPR	FALSE
chr1	55604683	-	0	0	0	0	0	0	1	B	FALSE
chr1	55607412	-	0	1	0	0	0	0	1	AB	FALSE
chr1	55609905	-	0	1	1	1	0	1	0	APRM	FALSE
chr1	55612732	-	1	0	0	0	0	0	1	UB	FALSE
chr1	55612756	-	0	1	1	0	0	0	0	AP	FALSE
chr1	55612759	-	1	1	1	0	0	0	0	UAP	FALSE
chr1	55613503	-	1	1	1	0	0	1	0	UAPM	FALSE
chr1	55619615	-	0	1	1	1	1	1	1	APRSMB	FALSE
chr1	55620167	-	1	1	1	0	0	1	0	UAPM	FALSE
chr1	55624746	-	0	1	1	0	0	1	0	APM	FALSE
chr1	55624747	-	0	0	1	0	0	1	0	PM	FALSE
chr1	55624748	-	1	1	1	0	0	0	0	UAP	FALSE
chr1	55642393	-	0	0	0	0	0	0	1	B	FALSE
chr1	56962374	-	1	1	1	0	0	0	1	UAPB	FALSE
chr1	59000003	-	0	0	0	0	0	0	0		FALSE
chr1	59000025	-	0	1	1	0	0	0	0	AP	FALSE
chr1	59126928	-	0	1	1	1	1	1	1	APRSMB	FALSE
chr1	59132952	-	0	1	1	0	0	0	1	APB	FALSE
chr1	59134266	-	1	1	1	0	0	1	0	UAPM	FALSE
chr1	59134389	-	0	1	1	0	0	1	1	APMB	FALSE
chr1	59137630	-	0	0	0	0	0	0	1	B	FALSE
chr1	59139359	-	1	1	1	0	0	1	1	UAPMB	FALSE
chr1	59154808	-	0	1	1	0	0	1	1	APMB	FALSE
chr1	59156083	-	1	1	0	0	0	1	0	UAM	FALSE
chr1	59156089	-	0	0	0	1	1	0	1	RSB	FALSE
chr1	59156102	-	0	0	1	0	0	0	1	PB	FALSE
chr1	62174074	-	0	1	0	0	0	0	1	AB	FALSE
chr1	62953115	-	1	1	1	0	0	0	1	UAPB	FALSE
chr1	62971520	-	1	1	1	1	0	1	0	UAPRM	FALSE
chr1	62995167	-	1	1	1	0	0	1	1	UAPMB	FALSE
chr1	63084564	-	1	1	1	1	1	1	1	UAPRSMB	TRUE
chr1	63091096	-	1	1	1	0	0	0	1	UAPB	FALSE
chr1	63099272	-	1	0	1	0	0	0	1	UPB	FALSE
chr1	63099570	-	0	0	0	0	0	0	1	B	FALSE
chr1	63920144	-	0	0	0	0	0	0	1	B	FALSE
chr1	63920474	-	0	1	0	1	0	0	0	AR	FALSE
chr1	65300377	-	0	0	1	0	0	1	0	PM	FALSE
chr1	65301217	-	1	1	1	1	1	1	1	UAPRSMB	TRUE
chr1	65303807	-	1	1	1	0	0	1	1	UAPMB	FALSE
chr1	65309918	-	0	1	1	1	1	1	1	APRSMB	FALSE
chr1	65312443	-	0	1	1	1	1	1	1	APRSMB	FALSE
chr1	65312445	-	0	1	1	1	0	1	0	APRM	FALSE
chr1	65335180	-	0	1	1	1	1	1	1	APRSMB	FALSE
chr1	65349183	-	0	1	1	0	0	1	0	APM	FALSE
chr1	65349188	-	1	1	1	1	1	1	1	UAPRSMB	TRUE
chr1	67513049	-	1	0	0	0	0	0	0	U	FALSE
chr1	67515564	-	0	1	1	1	1	1	1	APRSMB	FALSE
chr1	67516301	-	0	0	0	0	0	0	1	B	FALSE
chr1	67518639	-	0	1	0	0	0	0	1	AB	FALSE
chr1	67878946	-	0	0	0	0	0	0	0		FALSE
chr1	67878966	-	1	1	1	1	1	1	1	UAPRSMB	TRUE
chr1	67889981	-	0	1	1	0	0	1	0	APM	FALSE
chr1	67889988	-	0	1	1	1	1	1	1	APRSMB	FALSE
chr1	67890032	-	0	1	1	0	0	1	0	APM	FALSE
chr1	67890038	-	0	1	1	0	0	1	1	APMB	FALSE
chr1	67890905	-	1	1	0	0	0	0	0	UA	FALSE
chr1	68299002	-	0	0	0	0	0	0	0		FALSE
chr1	68611696	-	0	1	0	0	0	0	0	A	FALSE
chr1	68611709	-	0	1	1	1	0	1	0	APRM	FALSE
chr1	68613917	-	1	1	1	1	1	1	1	UAPRSMB	TRUE
chr1	68614378	-	0	0	1	0	0	0	1	PB	FALSE
chr1	68614383	-	0	0	1	1	1	0	1	PRSB	FALSE
chr1	68614384	-	0	0	1	0	0	0	1	PB	FALSE
chr1	68620968	-	0	0	1	0	0	0	1	PB	FALSE
chr1	68947330	-	1	1	1	0	0	1	1	UAPMB	FALSE
chr1	68948671	-	1	1	0	0	0	1	1	UAMB	FALSE
chr1	70625141	-	0	1	1	0	0	1	0	APM	FALSE
chr1	70639415	-	0	0	1	0	0	0	1	PB	FALSE
chr1	70646917	-	1	0	1	0	0	0	0	UP	FALSE
chr1	70650628	-	1	1	1	0	0	1	1	UAPMB	FALSE
chr1	70736665	-	0	1	1	0	0	0	0	AP	FALSE
chr1	70761969	-	1	1	1	1	1	1	1	UAPRSMB	TRUE
chr1	70772009	-	0	0	1	0	0	0	1	PB	FALSE
chr1	70781270	-	1	1	1	0	0	0	1	UAPB	FALSE
chr1	71530854	-	1	1	1	1	1	0	0	UAPRS	TRUE
chr1	71531138	-	0	0	0	1	1	0	1	RSB	FALSE
chr1	71536337	-	0	0	0	0	0	0	0		FALSE
chr1	71537960	-	0	1	1	0	0	1	0	APM	FALSE
chr1	71538295	-	0	0	0	0	0	0	1	B	FALSE
chr1	71544461	-	0	1	0	0	0	0	1	AB	FALSE
chr1	75699784	-	0	1	0	0	0	0	0	A	FALSE
chr1	78031495	-	1	1	1	0	0	0	0	UAP	FALSE
chr1	78031498	-	1	0	1	1	1	1	1	UPRSMB	TRUE
chr1	78041929	-	0	1	1	0	0	1	0	APM	FALSE
chr1	78041930	-	0	1	1	0	0	1	1	APMB	FALSE
chr1	78046753	-	1	1	0	0	0	0	1	UAB	FALSE
chr1	78046779	-	0	0	1	0	0	0	1	PB	FALSE
chr1	78099139	-	1	0	1	0	0	0	1	UPB	FALSE
chr1	78189157	-	1	0	1	0	0	0	1	UPB	FALSE
chr1	78189469	-	0	0	0	0	0	0	1	B	FALSE
chr1	78200101	-	0	0	0	0	0	0	1	B	FALSE
chr1	78205102	-	0	0	0	0	0	0	0		FALSE
chr1	78205310	-	0	1	0	0	0	0	1	AB	FALSE
chr1	78206648	-	1	0	1	0	0	1	0	UPM	FALSE
chr1	78413261	-	1	0	1	0	0	1	1	UPMB	FALSE
chr1	78414148	-	0	0	0	0	0	0	1	B	FALSE
chr1	78414495	-	1	1	1	1	1	1	1	UAPRSMB	TRUE
chr1	78421054	-	0	1	1	0	0	0	0	AP	FALSE
chr1	78422408	-	1	1	1	0	0	1	1	UAPMB	FALSE
chr1	78428631	-	0	0	1	0	0	1	0	PM	FALSE
chr1	78428632	-	1	1	1	1	1	1	1	UAPRSMB	TRUE
chr1	78429430	-	1	1	1	1	1	1	1	UAPRSMB	TRUE
chr1	78430915	-	0	0	0	0	0	0	0		FALSE
chr1	78430932	-	0	1	1	1	1	0	0	APRS	FALSE
chr1	78430941	-	1	1	1	0	0	1	0	UAPM	FALSE
chr1	78430956	-	0	0	1	0	0	0	0	P	FALSE
chr1	78433179	-	0	0	0	0	0	1	0	M	FALSE
chr1	78433397	-	1	1	1	1	1	0	1	UAPRSB	TRUE
chr1	78433906	-	0	1	1	0	0	1	1	APMB	FALSE
chr1	78434470	-	0	0	0	0	0	0	1	B	FALSE
chr1	78434504	-	0	0	0	0	0	0	1	B	FALSE
chr1	78434793	-	1	1	1	0	0	1	1	UAPMB	FALSE
chr1	78435445	-	0	0	0	0	0	0	1	B	FALSE
chr1	79383766	-	1	1	1	1	0	0	1	UAPRB	FALSE
chr1	84348819	-	0	0	0	0	0	0	0		FALSE
chr1	84966986	-	0	1	0	0	0	0	1	AB	FALSE
chr1	85116250	-	0	1	1	1	1	1	0	APRSM	FALSE
chr1	85117047	-	0	0	0	0	0	0	1	B	FALSE
chr1	85121709	-	1	1	1	1	1	1	1	UAPRSMB	TRUE
chr1	85121717	-	0	1	1	0	0	1	0	APM	FALSE
chr1	85122167	-	0	0	0	1	0	0	0	R	FALSE
chr1	85122178	-	1	1	0	0	0	1	0	UAM	FALSE
chr1	85122186	-	1	1	1	1	1	1	0	UAPRSM	TRUE
chr1	85128243	-	0	1	1	0	0	1	1	APMB	FALSE
chr1	85397269	-	1	0	1	0	0	1	1	UPMB	FALSE
chr1	85405414	-	0	1	1	0	0	1	1	APMB	FALSE
chr1	85648908	-	0	1	1	0	0	1	0	APM	FALSE
chr1	85724434	-	0	1	1	1	1	1	1	APRSMB	FALSE
chr1	85787299	-	0	0	1	0	0	0	1	PB	FALSE
chr1	85816301	-	0	1	0	0	0	0	1	AB	FALSE
chr1	85817287	-	1	1	1	0	0	1	1	UAPMB	FALSE
chr1	86142996	-	0	0	0	1	1	0	1	RSB	FALSE
chr1	86143016	-	0	1	1	0	0	0	1	APB	FALSE
chr1	86173619	-	0	0	0	0	0	0	1	B	FALSE
chr1	86818688	-	1	1	1	0	0	1	0	UAPM	FALSE
chr1	86820566	-	0	1	1	0	0	0	1	APB	FALSE
chr1	86826259	-	1	0	1	0	0	0	1	UPB	FALSE
chr1	86826267	-	0	1	1	0	0	0	1	APB	FALSE
chr1	89408799	-	1	1	1	1	1	1	1	UAPRSMB	TRUE
chr1	89408811	-	0	1	1	0	0	0	1	APB	FALSE
chr1	89473561	-	0	1	1	0	0	1	1	APMB	FALSE
chr1	89526040	-	1	1	1	0	0	0	1	UAPB	FALSE
chr1	89574013	-	0	0	1	0	0	0	1	PB	FALSE
chr1	89578396	-	1	1	1	1	1	0	1	UAPRSB	TRUE
chr1	89586006	-	1	0	1	0	0	0	1	UPB	FALSE
chr1	89587691	-	0	1	1	0	0	0	1	APB	FALSE
chr1	89587819	-	0	0	0	0	0	0	1	B	FALSE
chr1	89736545	-	0	0	0	0	0	0	1	B	FALSE
chr1	91382569	-	1	1	1	1	0	1	0	UAPRM	FALSE
chr1	91403667	-	1	0	1	0	0	1	0	UPM	FALSE
chr1	91731664	-	0	0	0	1	0	0	0	R	FALSE
chr1	92163705	-	1	1	1	0	0	1	1	UAPMB	FALSE
chr1	92178099	-	0	0	0	0	0	0	0		FALSE
chr1	92181976	-	1	1	1	0	0	1	1	UAPMB	FALSE
chr1	92185054	-	0	0	1	1	0	0	1	PRB	FALSE
chr1	92185811	-	1	1	1	1	1	1	1	UAPRSMB	TRUE
chr1	92712725	-	0	1	1	0	0	1	0	APM	FALSE
chr1	92730220	-	0	1	1	1	0	1	0	APRM	FALSE
chr1	92732328	-	1	1	1	1	1	1	1	UAPRSMB	TRUE
chr1	92754720	-	1	1	1	0	0	0	0	UAP	FALSE
chr1	92755981	-	0	0	0	0	0	0	1	B	FALSE
chr1	92763605	-	1	0	1	0	0	0	1	UPB	FALSE
chr1	93159948	-	0	0	0	0	0	0	1	B	FALSE
chr1	93622039	-	1	0	0	0	0	0	1	UB	FALSE
chr1	93624441	-	0	0	0	0	0	0	1	B	FALSE
chr1	93625251	-	0	0	0	0	0	0	1	B	FALSE
chr1	93805259	-	0	1	1	1	1	1	1	APRSMB	FALSE
chr1	94028001	-	1	1	1	1	1	0	1	UAPRSB	TRUE
chr1	94032615	-	0	0	0	0	0	0	1	B	FALSE
chr1	94033071	-	0	1	1	0	0	0	1	APB	FALSE
chr1	94033075	-	0	1	1	1	1	1	1	APRSMB	FALSE
chr1	94033077	-	0	1	1	0	0	1	1	APMB	FALSE
chr1	94037420	-	1	1	1	1	1	1	1	UAPRSMB	TRUE
chr1	94041136	-	0	0	0	0	0	0	1	B	FALSE
chr1	94048530	-	1	1	1	1	1	1	0	UAPRSM	TRUE
chr1	94049710	-	1	1	1	0	0	0	1	UAPB	FALSE
chr1	94057970	-	1	1	1	1	1	1	1	UAPRSMB	TRUE
chr1	94107692	-	0	0	0	0	0	0	1	B	FALSE
chr1	94336368	-	0	1	1	0	0	1	1	APMB	FALSE
chr1	94336372	-	1	1	1	0	0	1	1	UAPMB	FALSE
chr1	94336375	-	0	1	1	1	1	1	1	APRSMB	FALSE
chr1	94336403	-	0	1	1	1	1	0	1	APRSB	FALSE
chr1	94336763	-	0	0	0	1	1	0	1	RSB	FALSE
chr1	94337792	-	0	0	0	0	0	0	0		FALSE
chr1	94337813	-	1	1	1	0	0	1	0	UAPM	FALSE
chr1	94337824	-	0	0	1	0	0	0	1	PB	FALSE
chr1	94341358	-	0	1	1	0	0	1	1	APMB	FALSE
chr1	94360308	-	1	1	1	1	1	1	1	UAPRSMB	TRUE
chr1	94362403	-	0	1	1	0	0	1	0	APM	FALSE
chr1	94362407	-	1	1	1	0	0	1	0	UAPM	FALSE
chr1	94649844	-	0	0	0	0	0	0	1	B	FALSE
chr1	94649866	-	1	1	1	1	1	1	0	UAPRSM	TRUE
chr1	94649882	-	1	1	1	0	0	1	0	UAPM	FALSE
chr1	94649889	-	0	0	1	0	0	0	1	PB	FALSE
chr1	94650615	-	1	0	0	0	0	0	1	UB	FALSE
chr1	94650616	-	0	0	0	1	1	0	1	RSB	FALSE
chr1	94650620	-	0	0	0	0	0	0	1	B	FALSE
chr1	94650644	-	1	1	1	1	1	1	1	UAPRSMB	TRUE
chr1	94650649	-	1	0	1	0	0	0	1	UPB	FALSE
chr1	94654514	-	0	0	1	0	0	0	1	PB	FALSE
chr1	94654517	-	1	1	1	0	0	1	1	UAPMB	FALSE
chr1	94654525	-	0	1	1	0	0	1	1	APMB	FALSE
chr1	94654939	-	1	1	1	1	0	0	1	UAPRB	FALSE
chr1	94667436	-	0	0	1	0	0	0	1	PB	FALSE
chr1	94697244	-	0	0	1	0	0	1	1	PMB	FALSE
chr1	94996174	-	1	1	1	1	1	1	1	UAPRSMB	TRUE
chr1	95001747	-	0	1	1	1	0	1	1	APRMB	FALSE
chr1	95005927	-	0	1	0	1	0	0	1	ARB	FALSE
chr1	95006334	-	1	1	0	0	0	1	1	UAMB	FALSE
chr1	95006768	-	0	1	0	0	0	0	1	AB	FALSE
chr1	95365073	-	0	0	0	0	0	0	1	B	FALSE
chr1	95365101	-	1	0	1	1	0	1	1	UPRMB	FALSE
chr1	95367363	-	0	0	1	0	0	0	1	PB	FALSE
chr1	100181256	-	1	0	1	1	0	0	0	UPR	FALSE
chr1	100183112	-	1	1	1	1	1	1	1	UAPRSMB	TRUE
chr1	100203861	-	1	0	1	0	0	0	1	UPB	FALSE
chr1	100573583	-	1	1	1	0	0	1	1	UAPMB	FALSE
chr1	100584724	-	0	1	1	0	0	1	1	APMB	FALSE
chr1	100588621	-	1	0	0	0	0	0	1	UB	FALSE
chr1	100588873	-	0	1	1	0	0	1	0	APM	FALSE
chr1	100680564	-	0	1	1	0	0	1	1	APMB	FALSE
chr1	100683841	-	0	0	0	0	0	0	1	B	FALSE
chr1	101456207	-	0	1	1	1	1	1	0	APRSM	FALSE
chr1	101456210	-	0	1	1	1	0	1	0	APRM	FALSE
chr1	101456212	-	1	1	1	0	0	1	0	UAPM	FALSE
chr1	101458321	-	0	1	1	1	0	1	0	APRM	FALSE
chr1	101491050	-	1	1	1	0	0	1	0	UAPM	FALSE
chr1	103347343	-	1	1	1	0	0	0	1	UAPB	FALSE
chr1	103354210	-	1	1	1	0	0	1	1	UAPMB	FALSE
chr1	103354512	-	0	0	1	0	0	0	1	PB	FALSE
chr1	103427843	-	1	1	1	1	1	0	1	UAPRSB	TRUE
chr1	103444686	-	1	1	1	0	0	1	1	UAPMB	FALSE
chr1	108300006	-	0	1	1	0	0	0	1	APB	FALSE
chr1	108724683	-	1	1	1	0	0	1	1	UAPMB	FALSE
chr1	109480066	-	0	1	1	0	0	1	0	APM	FALSE
chr1	109482425	-	1	1	1	0	0	1	0	UAPM	FALSE
chr1	109482796	-	0	1	1	0	0	0	1	APB	FALSE
chr1	109486724	-	1	1	1	1	1	0	1	UAPRSB	TRUE
chr1	109486728	-	0	1	1	0	0	0	0	AP	FALSE
chr1	109492565	-	1	1	1	0	0	1	0	UAPM	FALSE
chr1	109517304	-	0	0	0	0	0	0	1	B	FALSE
chr1	109525433	-	0	1	1	1	1	1	1	APRSMB	FALSE
chr1	109525438	-	1	0	1	1	0	1	0	UPRM	FALSE
chr1	109554340	-	0	0	0	0	0	0	1	B	FALSE
chr1	109556561	-	1	1	1	0	0	1	0	UAPM	FALSE
chr1	109607315	-	0	0	0	0	0	0	1	B	FALSE
chr1	109607329	-	1	0	1	0	0	0	1	UPB	FALSE
chr1	109617716	-	1	1	1	1	1	1	1	UAPRSMB	TRUE
chr1	109823139	-	1	1	1	1	1	0	1	UAPRSB	TRUE
chr1	109823560	-	1	0	1	1	1	0	1	UPRSB	TRUE
chr1	109823903	-	0	1	1	0	0	1	0	APM	FALSE
chr1	109823910	-	0	0	1	1	1	1	1	PRSMB	FALSE
chr1	109825215	-	0	1	1	0	0	0	0	AP	FALSE
chr1	109825383	-	0	0	1	0	0	0	1	PB	FALSE
chr1	109825444	-	0	0	0	0	0	0	1	B	FALSE
chr1	109837941	-	1	0	1	0	0	0	1	UPB	FALSE
chr1	109856692	-	1	0	1	0	0	1	0	UPM	FALSE
chr1	109857014	-	0	0	0	1	0	0	1	RB	FALSE
chr1	109857437	-	0	0	1	0	0	0	0	P	FALSE
chr1	109857438	-	0	1	1	0	0	1	0	APM	FALSE
chr1	109859601	-	1	0	1	0	0	1	1	UPMB	FALSE
chr1	109859638	-	0	1	1	0	0	0	1	APB	FALSE
chr1	109860608	-	1	1	1	0	0	1	0	UAPM	FALSE
chr1	109867715	-	0	0	0	1	0	0	0	R	FALSE
chr1	109867729	-	1	0	1	0	0	0	0	UP	FALSE
chr1	109888541	-	0	1	1	0	0	0	0	AP	FALSE
chr1	109910941	-	0	1	0	0	0	1	1	AMB	FALSE
chr1	109951764	-	0	0	0	0	0	0	1	B	FALSE
chr1	109952667	-	0	1	1	0	0	0	1	APB	FALSE
chr1	109953734	-	1	0	0	0	0	0	0	U	FALSE
chr1	109953735	-	0	0	0	1	1	0	1	RSB	FALSE
chr1	109953767	-	1	1	1	1	1	0	1	UAPRSB	TRUE
chr1	109954826	-	1	0	1	1	1	1	1	UPRSMB	TRUE
chr1	109955756	-	1	0	0	0	0	0	0	U	FALSE
chr1	109955777	-	1	1	1	1	1	1	1	UAPRSMB	TRUE
chr1	109955779	-	1	0	1	0	0	0	1	UPB	FALSE
chr1	109957948	-	0	0	0	0	0	0	1	B	FALSE
chr1	109957999	-	1	0	1	0	0	1	0	UPM	FALSE
chr1	110280370	-	0	1	0	0	0	0	1	AB	FALSE
chr1	110280404	-	1	1	1	0	0	1	0	UAPM	FALSE
chr1	110282383	-	0	0	0	0	0	0	1	B	FALSE
chr1	110944227	-	1	1	1	0	0	0	1	UAPB	FALSE
chr1	110944241	-	1	1	1	0	0	0	1	UAPB	FALSE
chr1	110946681	-	1	1	1	0	0	0	1	UAPB	FALSE
chr1	110949057	-	1	1	1	1	1	1	1	UAPRSMB	TRUE
chr1	111491060	-	1	1	1	1	1	0	0	UAPRS	TRUE
chr1	111506140	-	0	0	0	1	0	0	0	R	FALSE
chr1	111660912	-	1	1	1	0	0	1	1	UAPMB	FALSE
chr1	111662609	-	1	1	1	0	0	0	0	UAP	FALSE
chr1	111730324	-	0	1	1	0	0	1	1	APMB	FALSE
chr1	111731053	-	0	0	0	1	1	0	1	RSB	FALSE
chr1	111731432	-	1	1	1	1	1	1	1	UAPRSMB	TRUE
chr1	111734965	-	1	1	1	0	0	1	1	UAPMB	FALSE
chr1	111737695	-	0	1	0	0	0	0	1	AB	FALSE
chr1	111738699	-	0	0	1	1	1	0	1	PRSB	FALSE
chr1	111738701	-	0	0	1	1	1	0	1	PRSB	FALSE
chr1	111738706	-	0	0	1	0	0	0	1	PB	FALSE
chr1	111958028	-	0	1	0	0	0	0	1	AB	FALSE
chr1	111983661	-	0	0	0	0	0	0	1	B	FALSE
chr1	111984031	-	0	0	1	0	0	1	0	PM	FALSE
chr1	111984034	-	0	0	1	0	0	0	1	PB	FALSE
chr1	111984035	-	0	0	1	1	1	0	1	PRSB	FALSE
chr1	111984036	-	1	0	1	1	1	1	0	UPRSM	TRUE
chr1	111984253	-	1	0	0	1	1	0	0	URS	FALSE
chr1	111984738	-	0	1	1	1	0	1	0	APRM	FALSE
chr1	111986038	-	0	1	1	0	0	0	1	APB	FALSE
chr1	111989791	-	0	1	1	1	1	1	1	APRSMB	FALSE
chr1	111990016	-	0	0	0	0	0	0	1	B	FALSE
chr1	111990224	-	1	1	1	1	1	1	1	UAPRSMB	TRUE
chr1	111990234	-	0	1	1	0	0	1	1	APMB	FALSE
chr1	113140746	-	0	0	1	0	0	0	1	PB	FALSE
chr1	113161792	-	0	1	1	0	0	1	1	APMB	FALSE
chr1	113245342	-	0	0	1	0	0	0	1	PB	FALSE
chr1	113253500	-	0	1	1	1	0	1	0	APRM	FALSE
chr1	114241035	-	0	1	1	0	0	1	0	APM	FALSE
chr1	114267544	-	1	1	1	0	0	0	1	UAPB	FALSE
chr1	114391300	-	0	0	1	0	0	0	0	P	FALSE
chr1	114438703	-	0	1	1	0	0	0	1	APB	FALSE
chr1	114439116	-	1	1	1	0	0	1	1	UAPMB	FALSE
chr1	114940499	-	1	0	1	0	0	1	1	UPMB	FALSE
chr1	114942230	-	0	1	0	0	0	0	0	A	FALSE
chr1	114944092	-	0	0	0	0	0	0	1	B	FALSE
chr1	114947718	-	0	1	0	0	0	0	1	AB	FALSE
chr1	114951383	-	1	1	1	1	1	1	1	UAPRSMB	TRUE
chr1	114964282	-	0	1	1	0	0	0	1	APB	FALSE
chr1	114968368	-	1	1	1	1	1	1	1	UAPRSMB	TRUE
chr1	114970539	-	0	1	1	0	0	1	0	APM	FALSE
chr1	114973573	-	0	0	1	0	0	0	1	PB	FALSE
chr1	115110904	-	1	0	1	0	0	1	1	UPMB	FALSE
chr1	115138520	-	1	1	1	0	0	1	1	UAPMB	FALSE
chr1	115250841	-	0	1	1	1	0	1	0	APRM	FALSE
chr1	115251301	-	0	1	1	1	1	1	1	APRSMB	FALSE
chr1	115260833	-	0	0	0	0	0	0	1	B	FALSE
chr1	115260868	-	1	1	1	0	0	1	0	UAPM	FALSE
chr1	115261385	-	1	1	1	0	0	1	1	UAPMB	FALSE
chr1	115261401	-	0	1	1	0	0	1	0	APM	FALSE
chr1	115261467	-	0	1	0	1	1	0	1	ARSB	FALSE
chr1	115262380	-	1	0	1	0	0	0	0	UP	FALSE
chr1	115262388	-	0	0	1	0	0	0	1	PB	FALSE
chr1	115263339	-	0	1	0	0	0	0	0	A	FALSE
chr1	115263357	-	1	1	1	0	0	1	1	UAPMB	FALSE
chr1	115263365	-	1	0	1	0	0	1	1	UPMB	FALSE
chr1	115266623	-	0	0	0	0	0	0	0		FALSE
chr1	115269029	-	1	1	1	1	1	1	0	UAPRSM	TRUE
chr1	115269737	-	1	1	1	0	0	1	0	UAPM	FALSE
chr1	115275437	-	0	0	0	1	0	0	0	R	FALSE
chr1	115275459	-	1	1	1	1	1	1	0	UAPRSM	TRUE
chr1	115275525	-	0	1	0	0	0	1	0	AM	FALSE
chr1	115277175	-	1	1	1	0	0	1	0	UAPM	FALSE
chr1	115277183	-	1	0	1	0	0	0	0	UP	FALSE
chr1	115279108	-	0	0	0	1	1	0	1	RSB	FALSE
chr1	115283579	-	1	0	0	0	0	0	1	UB	FALSE
chr1	115317013	-	1	1	1	0	0	0	1	UAPB	FALSE
chr1	115317402	-	0	0	0	0	0	0	1	B	FALSE
chr1	115321932	-	1	1	1	1	1	1	1	UAPRSMB	TRUE
chr1	115322856	-	0	1	1	1	1	1	1	APRSMB	FALSE
chr1	115323002	-	0	1	0	1	0	0	0	AR	FALSE
chr1	117120262	-	0	0	0	0	0	0	1	B	FALSE
chr1	117656146	-	0	0	1	0	0	0	1	PB	FALSE
chr1	117659388	-	0	1	1	0	0	0	0	AP	FALSE
chr1	118429275	-	0	0	0	0	0	0	0		FALSE
chr1	119576011	-	0	0	0	0	0	0	1	B	FALSE
chr1	120166768	-	1	1	1	1	1	0	1	UAPRSB	TRUE
chr1	120459478	-	0	1	0	1	1	0	1	ARSB	FALSE
chr1	120460407	-	1	1	1	1	0	1	0	UAPRM	FALSE
chr1	120460414	-	1	0	1	0	0	0	0	UP	FALSE
chr1	120460425	-	0	1	1	1	1	0	1	APRSB	FALSE
chr1	120461210	-	0	0	1	0	0	0	1	PB	FALSE
chr1	120462257	-	1	1	1	1	1	1	1	UAPRSMB	TRUE
chr1	120463044	-	0	1	1	0	0	1	0	APM	FALSE
chr1	120464341	-	0	1	0	0	0	0	1	AB	FALSE
chr1	120464432	-	0	0	0	0	0	0	1	B	FALSE
chr1	120464457	-	1	1	1	1	1	1	1	UAPRSMB	TRUE
chr1	120464465	-	1	0	1	1	1	0	1	UPRSB	TRUE
chr1	120464469	-	1	0	1	0	0	1	0	UPM	FALSE
chr1	120465462	-	1	1	1	1	1	1	1	UAPRSMB	TRUE
chr1	120468454	-	0	1	1	0	0	1	1	APMB	FALSE
chr1	120469261	-	0	1	1	0	0	1	0	APM	FALSE
chr1	120478328	-	0	0	0	0	0	0	1	B	FALSE
chr1	120483401	-	1	1	1	1	1	0	1	UAPRSB	TRUE
chr1	120483406	-	1	1	1	0	0	0	1	UAPB	FALSE
chr1	120483670	-	0	0	0	0	0	0	1	B	FALSE
chr1	120491207	-	0	1	1	1	0	1	0	APRM	FALSE
chr1	120491211	-	1	1	1	1	1	0	0	UAPRS	TRUE
chr1	120491773	-	0	1	1	0	0	1	1	APMB	FALSE
chr1	120493490	-	1	1	1	1	1	1	1	UAPRSMB	TRUE
chr1	120496332	-	0	1	1	1	1	0	1	APRSB	FALSE
chr1	120496335	-	0	1	1	1	1	1	1	APRSMB	FALSE
chr1	120510294	-	0	0	1	0	0	0	1	PB	FALSE
chr1	120510881	-	1	0	1	1	1	1	0	UPRSM	TRUE
[truncated: 61,735 more rows]
