# Supplementary material for: TechCrunch Interview With Mark Zuckerberg On $100 Million Education Donation
Source: HighWire-hosted journal article supplement (doi:10.1101/gr.202820.115), 2010-01-01
Supplement: Supplemental_Table_S7.xlsx [file Supplemental_Table_S7.xlsx]

## Sheet: BP_table_mouse_metric.txt
chrom	BP	strand	Fit U2-premRNA interaction motif?	Is BP an 'A'?	In expected position (10-60nt upstream of 3'ss)?	More than one validating read?	Discovered in more than one RNAseq source?	At least one read has mutation?	Discovered in unbiased RNAseq source?	Overall Quality Score	Example - BPs that fit a U2-premRNA motif, are in expected position, and are found in multiple RNAseq sources
chr1	4774218	-	1	0	1	0	0	1	1	UPMB	FALSE
chr1	9932817	-	0	1	1	0	0	0	1	APB	FALSE
chr1	10137638	-	1	1	1	0	0	1	1	UAPMB	FALSE
chr1	10148175	-	0	1	1	0	0	1	1	APMB	FALSE
chr1	10150138	-	1	0	1	0	0	1	1	UPMB	FALSE
chr1	10206098	-	0	1	1	0	0	1	1	APMB	FALSE
chr1	13138616	-	1	1	1	0	0	1	1	UAPMB	FALSE
chr1	13157223	-	0	1	1	0	0	1	1	APMB	FALSE
chr1	13275947	-	0	0	0	0	0	0	1	B	FALSE
chr1	13569936	-	0	1	1	0	0	1	1	APMB	FALSE
chr1	13617538	-	1	0	1	1	0	0	1	UPRB	FALSE
chr1	16091463	-	1	1	1	1	1	1	1	UAPRSMB	TRUE
chr1	16093434	-	1	1	1	0	0	0	1	UAPB	FALSE
chr1	16093788	-	0	0	1	0	0	1	1	PMB	FALSE
chr1	16093789	-	0	1	1	0	0	1	1	APMB	FALSE
chr1	16094291	-	0	0	0	0	0	0	1	B	FALSE
chr1	20793760	-	1	0	1	0	0	0	1	UPB	FALSE
chr1	20795438	-	1	1	1	0	0	1	1	UAPMB	FALSE
chr1	20796006	-	0	1	1	0	0	0	1	APB	FALSE
chr1	20798729	-	0	0	0	1	0	0	1	RB	FALSE
chr1	20800348	-	1	1	1	0	0	1	1	UAPMB	FALSE
chr1	20807712	-	0	0	0	0	0	0	1	B	FALSE
chr1	30868834	-	1	1	1	0	0	1	1	UAPMB	FALSE
chr1	33803879	-	1	1	1	0	0	0	1	UAPB	FALSE
chr1	33839061	-	1	1	1	0	0	0	1	UAPB	FALSE
chr1	36212125	-	1	1	1	0	0	1	1	UAPMB	FALSE
chr1	36218630	-	1	1	1	0	0	0	1	UAPB	FALSE
chr1	36219942	-	1	0	0	0	0	0	1	UB	FALSE
chr1	36219943	-	1	0	0	0	0	0	1	UB	FALSE
chr1	36284493	-	1	1	1	1	0	1	1	UAPRMB	FALSE
chr1	36401044	-	1	1	1	0	0	1	1	UAPMB	FALSE
chr1	36401917	-	0	0	1	0	0	0	1	PB	FALSE
chr1	36406332	-	1	1	1	0	0	1	1	UAPMB	FALSE
chr1	36408659	-	1	1	1	1	1	1	1	UAPRSMB	TRUE
chr1	36757241	-	1	1	1	0	0	0	1	UAPB	FALSE
chr1	36852288	-	0	1	1	1	1	1	1	APRSMB	FALSE
chr1	36856263	-	1	0	1	0	0	0	1	UPB	FALSE
chr1	36865345	-	1	1	1	0	0	1	1	UAPMB	FALSE
chr1	36868463	-	1	1	1	0	0	1	1	UAPMB	FALSE
chr1	36869181	-	1	1	1	1	0	1	1	UAPRMB	FALSE
chr1	36881908	-	0	0	0	0	0	0	1	B	FALSE
chr1	36886539	-	0	1	1	0	0	1	1	APMB	FALSE
chr1	37547263	-	0	1	1	0	0	1	1	APMB	FALSE
chr1	38050986	-	0	1	1	0	0	1	1	APMB	FALSE
chr1	38111161	-	1	1	1	0	0	0	1	UAPB	FALSE
chr1	38111732	-	0	1	1	0	0	1	1	APMB	FALSE
chr1	38112964	-	0	0	0	0	0	0	1	B	FALSE
chr1	43106733	-	0	1	1	0	0	0	1	APB	FALSE
chr1	43108855	-	1	1	1	0	0	0	1	UAPB	FALSE
chr1	44156786	-	0	1	0	0	0	1	1	AMB	FALSE
chr1	45975873	-	0	1	1	0	0	1	1	APMB	FALSE
chr1	51526531	-	0	0	0	0	0	1	1	MB	FALSE
chr1	51534487	-	0	0	1	0	0	0	1	PB	FALSE
chr1	51535109	-	0	0	0	0	0	0	1	B	FALSE
chr1	52245430	-	0	0	0	0	0	1	1	MB	FALSE
chr1	52271128	-	1	0	0	0	0	0	1	UB	FALSE
chr1	55051324	-	1	1	1	0	0	1	1	UAPMB	FALSE
chr1	55056623	-	1	1	1	0	0	1	1	UAPMB	FALSE
chr1	55057252	-	1	1	1	0	0	1	1	UAPMB	FALSE
chr1	55057256	-	0	1	1	0	0	1	1	APMB	FALSE
chr1	55063227	-	0	0	0	1	1	0	1	RSB	FALSE
chr1	55063247	-	0	1	1	1	1	1	1	APRSMB	FALSE
chr1	55138371	-	0	0	0	0	0	1	1	MB	FALSE
chr1	55140006	-	0	0	0	0	0	0	1	B	FALSE
chr1	55140668	-	1	0	1	1	1	0	1	UPRSB	TRUE
chr1	55143807	-	1	1	1	1	1	1	1	UAPRSMB	TRUE
chr1	55143811	-	0	1	1	1	1	1	1	APRSMB	FALSE
chr1	58473743	-	0	1	0	0	0	1	1	AMB	FALSE
chr1	58558751	-	1	1	1	1	0	0	1	UAPRB	FALSE
chr1	58972691	-	0	1	1	0	0	0	1	APB	FALSE
chr1	58975714	-	0	1	1	0	0	1	1	APMB	FALSE
chr1	59224148	-	0	0	1	0	0	0	1	PB	FALSE
chr1	60151390	-	1	1	1	0	0	1	1	UAPMB	FALSE
chr1	60154862	-	0	1	0	0	0	0	1	AB	FALSE
chr1	60558479	-	0	1	0	0	0	1	1	AMB	FALSE
chr1	63104414	-	0	0	0	0	0	0	1	B	FALSE
chr1	63112424	-	1	1	1	0	0	0	1	UAPB	FALSE
chr1	63211635	-	1	1	1	0	0	1	1	UAPMB	FALSE
chr1	64841817	-	0	0	1	0	0	1	1	PMB	FALSE
chr1	67051451	-	0	0	0	0	0	0	1	B	FALSE
chr1	72209080	-	1	1	1	0	0	0	1	UAPB	FALSE
chr1	72313936	-	0	0	0	0	0	0	1	B	FALSE
chr1	72906558	-	0	0	0	0	0	0	1	B	FALSE
chr1	74326916	-	1	0	1	0	0	0	1	UPB	FALSE
chr1	74339494	-	0	1	1	0	0	1	1	APMB	FALSE
chr1	74491124	-	0	1	1	0	0	1	1	APMB	FALSE
chr1	74624883	-	0	1	1	0	0	1	1	APMB	FALSE
chr1	74634439	-	0	0	0	0	0	0	1	B	FALSE
chr1	75125256	-	1	0	1	1	0	1	1	UPRMB	FALSE
chr1	75128087	-	1	1	0	0	0	0	1	UAB	FALSE
chr1	75136277	-	1	1	1	1	0	1	1	UAPRMB	FALSE
chr1	75138108	-	1	1	1	1	1	1	1	UAPRSMB	TRUE
chr1	75169572	-	1	1	1	0	0	1	1	UAPMB	FALSE
chr1	75170254	-	0	1	1	0	0	1	1	APMB	FALSE
chr1	75171420	-	0	0	1	0	0	0	1	PB	FALSE
chr1	75171423	-	0	0	1	1	1	1	1	PRSMB	FALSE
chr1	75171424	-	0	0	1	0	0	1	1	PMB	FALSE
chr1	75171430	-	0	1	1	0	0	1	1	APMB	FALSE
chr1	75172214	-	1	1	1	0	0	0	1	UAPB	FALSE
chr1	75213198	-	1	0	1	0	0	1	1	UPMB	FALSE
chr1	75215407	-	0	0	0	0	0	0	1	B	FALSE
chr1	75474418	-	1	0	1	0	0	1	1	UPMB	FALSE
chr1	75490661	-	1	1	1	0	0	0	1	UAPB	FALSE
chr1	77395202	-	1	1	1	0	0	1	1	UAPMB	FALSE
chr1	78459328	-	0	1	0	1	0	0	1	ARB	FALSE
chr1	78472907	-	1	1	1	0	0	1	1	UAPMB	FALSE
chr1	80279401	-	1	0	1	0	0	1	1	UPMB	FALSE
chr1	80283736	-	0	1	1	0	0	1	1	APMB	FALSE
chr1	80500386	-	0	0	0	0	0	0	1	B	FALSE
chr1	80592328	-	1	1	1	0	0	1	1	UAPMB	FALSE
chr1	84736232	-	0	1	0	0	0	0	1	AB	FALSE
chr1	84740594	-	0	0	0	0	0	0	1	B	FALSE
chr1	84743678	-	1	0	0	0	0	0	1	UB	FALSE
chr1	84743683	-	0	0	0	1	1	0	1	RSB	FALSE
chr1	84754130	-	1	1	1	1	0	1	1	UAPRMB	FALSE
chr1	88247639	-	1	1	1	1	0	1	1	UAPRMB	FALSE
chr1	88249230	-	1	1	1	0	0	0	1	UAPB	FALSE
chr1	88249879	-	1	1	1	0	0	0	1	UAPB	FALSE
chr1	88251750	-	1	1	1	0	0	1	1	UAPMB	FALSE
chr1	88252767	-	1	0	0	1	1	0	1	URSB	FALSE
chr1	88252768	-	0	0	0	1	1	0	1	RSB	FALSE
chr1	88255656	-	0	0	0	0	0	0	1	B	FALSE
chr1	90171707	-	1	1	1	0	0	0	1	UAPB	FALSE
chr1	93275182	-	1	1	1	1	1	1	1	UAPRSMB	TRUE
chr1	93278584	-	1	1	1	1	1	1	1	UAPRSMB	TRUE
chr1	93283943	-	1	1	1	1	0	1	1	UAPRMB	FALSE
chr1	93285063	-	1	0	1	1	0	0	1	UPRB	FALSE
chr1	93285074	-	1	1	1	1	0	1	1	UAPRMB	FALSE
chr1	93329495	-	1	1	1	0	0	1	1	UAPMB	FALSE
chr1	93855019	-	0	0	0	0	0	0	1	B	FALSE
chr1	94356879	-	1	0	0	0	0	0	1	UB	FALSE
chr1	94358948	-	1	0	1	0	0	1	1	UPMB	FALSE
chr1	94359779	-	0	1	1	0	0	0	1	APB	FALSE
chr1	95209251	-	0	0	0	0	0	0	1	B	FALSE
chr1	95231063	-	0	0	0	0	0	0	1	B	FALSE
chr1	95305087	-	1	0	1	1	0	0	1	UPRB	FALSE
chr1	95305093	-	0	1	1	0	0	1	1	APMB	FALSE
chr1	95305094	-	0	0	1	0	0	0	1	PB	FALSE
chr1	95305102	-	1	1	1	0	0	0	1	UAPB	FALSE
chr1	95305129	-	0	1	1	1	1	1	1	APRSMB	FALSE
chr1	95309100	-	0	1	1	1	1	1	1	APRSMB	FALSE
chr1	95309938	-	1	0	0	1	1	1	1	URSMB	FALSE
chr1	95310225	-	0	1	1	1	1	1	1	APRSMB	FALSE
chr1	95310226	-	0	0	1	0	0	0	1	PB	FALSE
chr1	95314266	-	0	0	0	1	1	1	1	RSMB	FALSE
chr1	95317815	-	1	0	1	1	1	1	1	UPRSMB	TRUE
chr1	95318028	-	1	1	1	0	0	1	1	UAPMB	FALSE
chr1	95324852	-	0	0	1	0	0	0	1	PB	FALSE
chr1	95324855	-	0	1	1	1	1	1	1	APRSMB	FALSE
chr1	95324867	-	1	0	1	0	0	1	1	UPMB	FALSE
chr1	95324879	-	0	0	1	0	0	0	1	PB	FALSE
chr1	95334680	-	0	0	0	0	0	0	1	B	FALSE
chr1	95521224	-	1	1	1	1	0	1	1	UAPRMB	FALSE
chr1	95521776	-	1	0	1	0	0	0	1	UPB	FALSE
chr1	95521896	-	0	1	0	0	0	0	1	AB	FALSE
chr1	95521914	-	0	1	0	0	0	0	1	AB	FALSE
chr1	95522211	-	1	1	1	0	0	1	1	UAPMB	FALSE
chr1	95522807	-	1	0	1	0	0	0	1	UPB	FALSE
chr1	95525556	-	1	0	0	1	1	0	1	URSB	FALSE
chr1	95531984	-	1	0	1	0	0	1	1	UPMB	FALSE
chr1	95695063	-	0	1	1	0	0	1	1	APMB	FALSE
chr1	95697512	-	0	1	1	1	1	1	1	APRSMB	FALSE
chr1	99625335	-	1	1	0	0	0	0	1	UAB	FALSE
chr1	99642048	-	1	1	0	1	0	0	1	UARB	FALSE
chr1	99651815	-	1	1	1	0	0	1	1	UAPMB	FALSE
chr1	99655963	-	1	1	1	0	0	1	1	UAPMB	FALSE
chr1	107494151	-	0	0	0	0	0	0	1	B	FALSE
chr1	107543413	-	0	1	1	0	0	1	1	APMB	FALSE
chr1	108608720	-	0	0	0	0	0	0	1	B	FALSE
chr1	108675654	-	0	1	1	0	0	0	1	APB	FALSE
chr1	108676707	-	1	1	1	0	0	1	1	UAPMB	FALSE
chr1	121451524	-	0	1	0	0	0	0	1	AB	FALSE
chr1	121469336	-	0	0	0	0	0	0	1	B	FALSE
chr1	121622696	-	1	1	1	0	0	1	1	UAPMB	FALSE
chr1	122010135	-	1	0	1	0	0	1	1	UPMB	FALSE
chr1	123452003	-	1	1	1	1	1	0	1	UAPRSB	TRUE
chr1	123454122	-	0	0	1	0	0	0	1	PB	FALSE
chr1	130231516	-	0	1	1	0	0	1	1	APMB	FALSE
chr1	132603513	-	1	0	1	1	0	1	1	UPRMB	FALSE
chr1	132954685	-	0	0	1	0	0	0	1	PB	FALSE
chr1	133170133	-	0	1	1	1	0	1	1	APRMB	FALSE
chr1	134888828	-	0	1	1	0	0	1	1	APMB	FALSE
chr1	135506335	-	1	1	1	0	0	1	1	UAPMB	FALSE
chr1	135518379	-	0	1	0	0	0	0	1	AB	FALSE
chr1	135518785	-	1	1	1	0	0	1	1	UAPMB	FALSE
chr1	135535214	-	1	1	1	1	1	1	1	UAPRSMB	TRUE
chr1	135542446	-	0	1	1	1	0	1	1	APRMB	FALSE
chr1	135625488	-	1	1	1	0	0	1	1	UAPMB	FALSE
chr1	135633258	-	0	0	1	0	0	0	1	PB	FALSE
chr1	135974287	-	0	0	0	0	0	0	1	B	FALSE
chr1	136670085	-	0	1	1	0	0	1	1	APMB	FALSE
chr1	136673079	-	1	1	1	0	0	0	1	UAPB	FALSE
chr1	137017119	-	1	0	1	0	0	1	1	UPMB	FALSE
chr1	137023680	-	1	0	1	0	0	0	1	UPB	FALSE
chr1	137162010	-	1	0	1	0	0	0	1	UPB	FALSE
chr1	137282607	-	1	1	1	0	0	0	1	UAPB	FALSE
chr1	137303163	-	1	0	1	1	1	1	1	UPRSMB	TRUE
chr1	137316951	-	0	1	1	0	0	0	1	APB	FALSE
chr1	138173641	-	0	0	0	0	0	0	1	B	FALSE
chr1	138173930	-	0	1	1	0	0	1	1	APMB	FALSE
chr1	140013636	-	0	1	1	0	0	1	1	APMB	FALSE
chr1	145986834	-	1	1	1	0	0	1	1	UAPMB	FALSE
chr1	153251050	-	0	1	1	1	1	1	1	APRSMB	FALSE
chr1	153318571	-	1	1	1	0	0	1	1	UAPMB	FALSE
chr1	154686538	-	1	1	1	0	0	0	1	UAPB	FALSE
chr1	154687622	-	0	1	1	0	0	1	1	APMB	FALSE
chr1	154691556	-	1	1	1	1	1	1	1	UAPRSMB	TRUE
chr1	154706408	-	0	0	0	0	0	1	1	MB	FALSE
chr1	154715524	-	1	1	1	0	0	1	1	UAPMB	FALSE
chr1	155089609	-	0	0	0	0	0	0	1	B	FALSE
chr1	155316896	-	0	1	1	0	0	1	1	APMB	FALSE
chr1	155325338	-	0	1	1	0	0	1	1	APMB	FALSE
chr1	155326133	-	0	0	1	0	0	1	1	PMB	FALSE
chr1	155328379	-	0	0	0	0	0	0	1	B	FALSE
chr1	155329742	-	0	1	0	0	0	1	1	AMB	FALSE
chr1	155330750	-	1	0	0	0	0	1	1	UMB	FALSE
chr1	157641804	-	1	1	1	0	0	1	1	UAPMB	FALSE
chr1	157710769	-	1	1	1	0	0	1	1	UAPMB	FALSE
chr1	157710773	-	1	1	1	0	0	1	1	UAPMB	FALSE
chr1	157759153	-	0	0	1	0	0	0	1	PB	FALSE
chr1	157805527	-	0	1	0	0	0	0	1	AB	FALSE
chr1	157864501	-	0	0	0	0	0	1	1	MB	FALSE
chr1	158603794	-	0	1	1	0	0	1	1	APMB	FALSE
chr1	162665923	-	1	0	1	0	0	1	1	UPMB	FALSE
chr1	162670786	-	0	0	0	0	0	0	1	B	FALSE
chr1	162975224	-	0	1	1	1	0	1	1	APRMB	FALSE
chr1	162991015	-	1	1	1	0	0	1	1	UAPMB	FALSE
chr1	163029439	-	0	1	1	0	0	1	1	APMB	FALSE
chr1	163775506	-	1	1	1	1	1	1	1	UAPRSMB	TRUE
chr1	164609771	-	1	1	1	1	1	1	1	UAPRSMB	TRUE
chr1	164611055	-	1	1	1	0	0	1	1	UAPMB	FALSE
chr1	164612676	-	1	1	1	1	0	1	1	UAPRMB	FALSE
chr1	164612686	-	1	1	1	1	0	1	1	UAPRMB	FALSE
chr1	164628426	-	1	1	1	1	0	1	1	UAPRMB	FALSE
chr1	164628430	-	0	1	1	0	0	1	1	APMB	FALSE
chr1	164651696	-	1	1	1	0	0	0	1	UAPB	FALSE
chr1	165884149	-	0	0	0	1	1	0	1	RSB	FALSE
chr1	165884193	-	0	0	0	0	0	0	1	B	FALSE
chr1	165884211	-	0	0	0	1	1	0	1	RSB	FALSE
chr1	167281430	-	1	1	1	0	0	1	1	UAPMB	FALSE
chr1	169167483	-	1	0	0	0	0	1	1	UMB	FALSE
chr1	171891360	-	0	1	1	0	0	1	1	APMB	FALSE
chr1	172087249	-	1	0	1	0	0	1	1	UPMB	FALSE
chr1	172091723	-	0	1	1	0	0	1	1	APMB	FALSE
chr1	172130169	-	1	1	1	0	0	1	1	UAPMB	FALSE
chr1	172717615	-	1	1	1	0	0	1	1	UAPMB	FALSE
chr1	173150819	-	0	1	1	1	0	0	1	APRB	FALSE
chr1	173168217	-	1	0	1	0	0	0	1	UPB	FALSE
chr1	173170948	-	0	1	0	0	0	0	1	AB	FALSE
chr1	173208345	-	0	0	1	0	0	1	1	PMB	FALSE
chr1	173210153	-	1	1	1	0	0	0	1	UAPB	FALSE
chr1	173210420	-	1	1	1	1	0	1	1	UAPRMB	FALSE
chr1	173210448	-	0	1	0	0	0	0	1	AB	FALSE
chr1	173214188	-	0	1	1	0	0	1	1	APMB	FALSE
chr1	173214885	-	1	1	1	1	1	1	1	UAPRSMB	TRUE
chr1	173215751	-	1	0	1	0	0	1	1	UPMB	FALSE
chr1	173219516	-	0	0	0	0	0	1	1	MB	FALSE
chr1	173224923	-	1	1	0	0	0	1	1	UAMB	FALSE
chr1	180260097	-	0	1	1	1	0	1	1	APRMB	FALSE
chr1	180260099	-	1	1	1	1	1	1	1	UAPRSMB	TRUE
chr1	180260570	-	0	1	0	0	0	0	1	AB	FALSE
chr1	180261001	-	1	1	1	1	0	1	1	UAPRMB	FALSE
chr1	180262109	-	1	1	1	0	0	1	1	UAPMB	FALSE
chr1	180263051	-	0	0	0	0	0	0	1	B	FALSE
chr1	180263799	-	1	0	1	0	0	1	1	UPMB	FALSE
chr1	181335271	-	0	0	0	0	0	0	1	B	FALSE
chr1	181461621	-	1	1	1	1	0	0	1	UAPRB	FALSE
chr1	181676680	-	1	0	1	0	0	1	1	UPMB	FALSE
chr1	181692774	-	0	1	0	0	0	1	1	AMB	FALSE
chr1	181699293	-	1	1	1	0	0	1	1	UAPMB	FALSE
chr1	181705675	-	1	1	1	0	0	0	1	UAPB	FALSE
chr1	181707714	-	1	1	1	0	0	0	1	UAPB	FALSE
chr1	181707718	-	1	1	1	0	0	0	1	UAPB	FALSE
chr1	181713209	-	1	1	1	0	0	0	1	UAPB	FALSE
chr1	181715292	-	1	1	1	0	0	0	1	UAPB	FALSE
chr1	181729194	-	0	1	0	0	0	0	1	AB	FALSE
chr1	182733360	-	0	1	1	0	0	1	1	APMB	FALSE
chr1	182740111	-	0	0	0	0	0	0	1	B	FALSE
chr1	182740143	-	0	0	0	0	0	0	1	B	FALSE
chr1	183042545	-	0	1	1	1	1	1	1	APRSMB	FALSE
chr1	183133313	-	1	1	1	0	0	1	1	UAPMB	FALSE
chr1	183139462	-	1	1	1	0	0	1	1	UAPMB	FALSE
chr1	183747724	-	1	1	1	0	0	1	1	UAPMB	FALSE
chr1	183750934	-	0	0	1	0	0	1	1	PMB	FALSE
chr1	183761547	-	0	1	0	0	0	0	1	AB	FALSE
chr1	183848489	-	0	0	1	1	0	0	1	PRB	FALSE
chr1	183852696	-	0	1	0	0	0	1	1	AMB	FALSE
chr1	186643249	-	0	1	1	0	0	0	1	APB	FALSE
chr1	186643251	-	1	1	1	1	1	1	1	UAPRSMB	TRUE
chr1	190796588	-	1	0	1	0	0	1	1	UPMB	FALSE
chr1	190800613	-	1	1	1	0	0	1	1	UAPMB	FALSE
chr1	190811536	-	1	1	1	1	0	0	1	UAPRB	FALSE
chr1	191495055	-	0	0	0	0	0	0	1	B	FALSE
chr1	191507876	-	1	1	1	0	0	1	1	UAPMB	FALSE
chr1	191706118	-	1	1	1	1	1	1	1	UAPRSMB	TRUE
chr1	191712823	-	0	1	1	0	0	0	1	APB	FALSE
chr1	193392036	-	0	1	0	0	0	0	1	AB	FALSE
chr1	194946944	-	0	0	1	0	0	0	1	PB	FALSE
chr1	194948311	-	1	0	1	0	0	0	1	UPB	FALSE
chr1	4881984	+	1	1	1	1	1	1	1	UAPRSMB	TRUE
chr1	5140006	+	1	1	1	0	0	1	1	UAPMB	FALSE
chr1	6255632	+	0	1	1	0	0	1	1	APMB	FALSE
chr1	15809686	+	1	1	1	0	0	1	1	UAPMB	FALSE
chr1	15823455	+	0	1	1	0	0	1	1	APMB	FALSE
chr1	16121122	+	1	1	1	0	0	1	1	UAPMB	FALSE
chr1	16655761	+	0	1	0	0	0	1	1	AMB	FALSE
chr1	34313571	+	0	0	0	1	0	0	1	RB	FALSE
chr1	34500194	+	0	1	1	1	1	1	1	APRSMB	FALSE
chr1	36477614	+	0	0	0	0	0	0	1	B	FALSE
chr1	36577334	+	1	1	1	1	1	1	1	UAPRSMB	TRUE
chr1	36578521	+	1	1	1	0	0	1	1	UAPMB	FALSE
chr1	36749035	+	0	1	1	1	0	1	1	APRMB	FALSE
chr1	37426176	+	1	0	1	0	0	1	1	UPMB	FALSE
chr1	38078411	+	0	1	1	0	0	1	1	APMB	FALSE
chr1	38098516	+	1	1	1	0	0	1	1	UAPMB	FALSE
chr1	38107446	+	1	1	0	0	0	0	1	UAB	FALSE
chr1	39048064	+	0	1	1	0	0	1	1	APMB	FALSE
chr1	39427775	+	1	1	1	0	0	1	1	UAPMB	FALSE
chr1	39427780	+	0	1	1	0	0	1	1	APMB	FALSE
chr1	39428053	+	0	0	0	0	0	0	1	B	FALSE
chr1	39428125	+	1	0	1	0	0	1	1	UPMB	FALSE
chr1	39602004	+	1	0	0	0	0	0	1	UB	FALSE
chr1	40501150	+	1	1	1	0	0	1	1	UAPMB	FALSE
chr1	44034155	+	1	0	0	0	0	1	1	UMB	FALSE
chr1	45862383	+	0	0	0	0	0	1	1	MB	FALSE
chr1	45863488	+	0	1	1	0	0	1	1	APMB	FALSE
chr1	45876938	+	1	1	1	1	1	1	1	UAPRSMB	TRUE
chr1	52163728	+	1	1	1	0	0	1	1	UAPMB	FALSE
chr1	52194098	+	1	0	1	0	0	0	1	UPB	FALSE
chr1	55121002	+	1	1	1	0	0	0	1	UAPB	FALSE
chr1	57466725	+	1	1	1	0	0	1	1	UAPMB	FALSE
chr1	58053320	+	0	0	0	0	0	0	1	B	FALSE
chr1	58455823	+	1	1	1	1	0	1	1	UAPRMB	FALSE
chr1	58455837	+	1	0	0	0	0	0	1	UB	FALSE
chr1	58567386	+	1	1	1	0	0	1	1	UAPMB	FALSE
chr1	58711770	+	1	1	1	1	0	1	1	UAPRMB	FALSE
chr1	58888422	+	1	1	1	1	0	0	1	UAPRB	FALSE
chr1	58888428	+	1	1	1	0	0	1	1	UAPMB	FALSE
chr1	59050383	+	0	1	1	0	0	1	1	APMB	FALSE
chr1	59761436	+	1	1	1	0	0	1	1	UAPMB	FALSE
chr1	59761442	+	1	1	1	0	0	0	1	UAPB	FALSE
chr1	59763453	+	1	1	1	0	0	1	1	UAPMB	FALSE
chr1	60274007	+	0	1	1	0	0	1	1	APMB	FALSE
chr1	63225533	+	0	1	0	0	0	0	1	AB	FALSE
chr1	63225557	+	0	1	0	0	0	0	1	AB	FALSE
chr1	63225797	+	1	1	1	0	0	1	1	UAPMB	FALSE
chr1	63782591	+	0	0	0	0	0	0	1	B	FALSE
chr1	65266302	+	0	1	1	0	0	0	1	APB	FALSE
chr1	65305333	+	1	1	1	1	0	1	1	UAPRMB	FALSE
chr1	65315243	+	0	0	1	0	0	0	1	PB	FALSE
chr1	71605776	+	1	1	1	0	0	1	1	UAPMB	FALSE
chr1	71611364	+	0	1	1	0	0	1	1	APMB	FALSE
chr1	71619457	+	1	1	1	0	0	1	1	UAPMB	FALSE
chr1	71624320	+	1	1	1	0	0	1	1	UAPMB	FALSE
chr1	71624322	+	0	1	1	0	0	0	1	APB	FALSE
chr1	72356965	+	1	1	1	0	0	1	1	UAPMB	FALSE
chr1	72381177	+	0	1	1	0	0	0	1	APB	FALSE
chr1	72645316	+	1	1	1	0	0	1	1	UAPMB	FALSE
chr1	72647919	+	0	0	1	0	0	0	1	PB	FALSE
chr1	72758055	+	0	0	0	0	0	0	1	B	FALSE
chr1	72760050	+	0	1	1	1	1	1	1	APRSMB	FALSE
chr1	74283356	+	0	0	1	0	0	0	1	PB	FALSE
chr1	74409328	+	0	0	0	0	0	0	1	B	FALSE
chr1	74440569	+	0	0	1	1	0	0	1	PRB	FALSE
chr1	74440570	+	0	0	1	1	0	0	1	PRB	FALSE
chr1	74636037	+	1	1	1	1	0	0	1	UAPRB	FALSE
chr1	74732858	+	0	1	1	0	0	0	1	APB	FALSE
chr1	74733046	+	0	0	0	1	0	0	1	RB	FALSE
chr1	74733742	+	1	0	1	0	0	1	1	UPMB	FALSE
chr1	74743724	+	1	0	1	1	1	1	1	UPRSMB	TRUE
chr1	75139924	+	1	1	1	0	0	0	1	UAPB	FALSE
chr1	75167528	+	0	1	1	1	0	1	1	APRMB	FALSE
chr1	75208477	+	1	1	1	0	0	1	1	UAPMB	FALSE
chr1	75209711	+	0	0	0	0	0	1	1	MB	FALSE
chr1	75237684	+	0	0	0	0	0	0	1	B	FALSE
chr1	75240011	+	0	1	1	0	0	1	1	APMB	FALSE
chr1	75241331	+	1	1	1	0	0	0	1	UAPB	FALSE
chr1	75438277	+	0	0	1	1	0	1	1	PRMB	FALSE
chr1	75438278	+	0	1	1	0	0	0	1	APB	FALSE
chr1	75521642	+	1	1	1	1	1	1	1	UAPRSMB	TRUE
chr1	75523905	+	0	0	1	1	1	1	1	PRSMB	FALSE
chr1	75523918	+	0	0	1	1	1	0	1	PRSB	FALSE
chr1	75526487	+	1	0	1	0	0	1	1	UPMB	FALSE
chr1	78692975	+	0	1	1	0	0	1	1	APMB	FALSE
chr1	82747067	+	1	1	1	0	0	1	1	UAPMB	FALSE
chr1	82872064	+	0	0	0	1	1	0	1	RSB	FALSE
chr1	82882928	+	0	1	1	0	0	1	1	APMB	FALSE
chr1	82891050	+	0	0	0	0	0	0	1	B	FALSE
chr1	87732191	+	0	1	0	0	0	1	1	AMB	FALSE
chr1	87733836	+	0	1	1	0	0	1	1	APMB	FALSE
chr1	87738732	+	0	1	1	1	1	1	1	APRSMB	FALSE
chr1	88030188	+	0	1	1	0	0	1	1	APMB	FALSE
chr1	88104729	+	0	1	0	0	0	0	1	AB	FALSE
chr1	88426264	+	0	0	1	0	0	1	1	PMB	FALSE
chr1	88426518	+	1	1	1	1	1	1	1	UAPRSMB	TRUE
chr1	88943593	+	1	1	1	0	0	0	1	UAPB	FALSE
chr1	89117473	+	1	1	1	1	1	1	1	UAPRSMB	TRUE
chr1	89230992	+	0	0	0	0	0	0	1	B	FALSE
chr1	89250954	+	1	1	1	1	0	1	1	UAPRMB	FALSE
chr1	89261926	+	0	0	0	0	0	0	1	B	FALSE
chr1	89307217	+	1	0	1	0	0	1	1	UPMB	FALSE
chr1	89313370	+	0	1	1	0	0	1	1	APMB	FALSE
chr1	89340194	+	0	1	1	0	0	1	1	APMB	FALSE
chr1	89345652	+	0	0	0	0	0	0	1	B	FALSE
chr1	89670705	+	1	0	1	0	0	0	1	UPB	FALSE
chr1	89672305	+	1	1	1	0	0	1	1	UAPMB	FALSE
chr1	89676669	+	1	0	1	0	0	0	1	UPB	FALSE
chr1	89837919	+	1	1	1	1	1	1	1	UAPRSMB	TRUE
chr1	89838935	+	1	0	1	0	0	0	1	UPB	FALSE
chr1	92503418	+	0	0	0	0	0	1	1	MB	FALSE
chr1	93266644	+	0	1	1	0	0	1	1	APMB	FALSE
chr1	93267182	+	0	1	1	0	0	1	1	APMB	FALSE
chr1	93416588	+	0	0	1	0	0	0	1	PB	FALSE
chr1	93416598	+	1	1	1	0	0	0	1	UAPB	FALSE
chr1	93424147	+	1	1	1	0	0	0	1	UAPB	FALSE
chr1	93443480	+	0	1	1	0	0	1	1	APMB	FALSE
chr1	94812374	+	1	1	1	0	0	1	1	UAPMB	FALSE
chr1	94816121	+	1	1	1	0	0	1	1	UAPMB	FALSE
chr1	94839859	+	0	1	1	0	0	0	1	APB	FALSE
chr1	95246880	+	1	0	1	0	0	0	1	UPB	FALSE
chr1	95254311	+	1	1	1	0	0	0	1	UAPB	FALSE
chr1	95392132	+	1	1	1	1	1	1	1	UAPRSMB	TRUE
chr1	95398061	+	1	1	1	0	0	1	1	UAPMB	FALSE
chr1	95404261	+	0	1	1	0	0	1	1	APMB	FALSE
chr1	95672184	+	1	1	1	0	0	1	1	UAPMB	FALSE
chr1	95674837	+	1	1	1	1	0	1	1	UAPRMB	FALSE
chr1	95683067	+	1	1	1	0	0	0	1	UAPB	FALSE
chr1	99681301	+	1	0	1	0	0	1	1	UPMB	FALSE
chr1	107915013	+	1	0	0	0	0	0	1	UB	FALSE
chr1	108239927	+	1	0	1	0	0	1	1	UPMB	FALSE
chr1	108288678	+	1	1	1	1	1	1	1	UAPRSMB	TRUE
chr1	108439073	+	0	0	0	0	0	0	1	B	FALSE
chr1	120361084	+	0	1	1	0	0	1	1	APMB	FALSE
chr1	120400373	+	0	1	1	0	0	0	1	APB	FALSE
chr1	120421850	+	0	1	1	0	0	1	1	APMB	FALSE
chr1	120448565	+	1	1	1	1	0	0	1	UAPRB	FALSE
chr1	123334355	+	0	0	1	0	0	1	1	PMB	FALSE
chr1	123389453	+	1	1	1	0	0	1	1	UAPMB	FALSE
chr1	129694382	+	1	1	1	0	0	1	1	UAPMB	FALSE
chr1	129827255	+	1	1	1	0	0	1	1	UAPMB	FALSE
chr1	129834538	+	1	1	1	0	0	1	1	UAPMB	FALSE
chr1	129834546	+	1	0	1	0	0	0	1	UPB	FALSE
chr1	130148759	+	1	1	1	1	0	1	1	UAPRMB	FALSE
chr1	132917540	+	0	0	0	0	0	0	1	B	FALSE
chr1	132917905	+	0	0	0	0	0	0	1	B	FALSE
chr1	133069878	+	0	0	0	0	0	0	1	B	FALSE
chr1	133740890	+	0	0	1	0	0	0	1	PB	FALSE
chr1	133764052	+	0	0	1	0	0	0	1	PB	FALSE
chr1	133873967	+	1	1	1	0	0	1	1	UAPMB	FALSE
chr1	133877833	+	1	1	1	0	0	0	1	UAPB	FALSE
chr1	134394485	+	0	1	1	0	0	1	1	APMB	FALSE
chr1	134996044	+	0	0	0	0	0	1	1	MB	FALSE
chr1	135168760	+	1	1	1	0	0	1	1	UAPMB	FALSE
chr1	136307445	+	0	1	1	0	0	1	1	APMB	FALSE
chr1	136324716	+	0	0	0	0	0	0	1	B	FALSE
chr1	136382272	+	1	0	1	0	0	0	1	UPB	FALSE
chr1	136490171	+	0	0	0	0	0	0	1	B	FALSE
chr1	136518483	+	1	1	1	1	0	1	1	UAPRMB	FALSE
chr1	137033865	+	0	1	1	0	0	0	1	APB	FALSE
chr1	137034322	+	1	1	1	0	0	1	1	UAPMB	FALSE
chr1	137049334	+	1	0	1	0	0	0	1	UPB	FALSE
chr1	137051772	+	0	1	1	1	0	1	1	APRMB	FALSE
chr1	137915055	+	0	0	1	0	0	1	1	PMB	FALSE
chr1	137916213	+	0	1	1	0	0	1	1	APMB	FALSE
chr1	138015202	+	0	0	1	0	0	0	1	PB	FALSE
chr1	138054018	+	1	0	1	0	0	1	1	UPMB	FALSE
chr1	138383584	+	0	1	1	0	0	0	1	APB	FALSE
chr1	138412430	+	0	0	0	0	0	0	1	B	FALSE
chr1	138423796	+	0	0	1	0	0	0	1	PB	FALSE
chr1	138521814	+	0	0	1	1	0	0	1	PRB	FALSE
chr1	141353280	+	1	1	1	0	0	1	1	UAPMB	FALSE
chr1	141386517	+	1	1	1	0	0	1	1	UAPMB	FALSE
chr1	152259030	+	0	0	0	0	0	0	1	B	FALSE
chr1	152260000	+	1	1	1	0	0	1	1	UAPMB	FALSE
chr1	152261516	+	0	1	1	1	1	1	1	APRSMB	FALSE
chr1	152272742	+	1	1	1	0	0	1	1	UAPMB	FALSE
chr1	152276434	+	0	0	1	0	0	0	1	PB	FALSE
chr1	152278263	+	0	0	1	0	0	0	1	PB	FALSE
chr1	152287547	+	0	1	1	1	0	1	1	APRMB	FALSE
chr1	152291701	+	0	0	0	0	0	1	1	MB	FALSE
chr1	153206731	+	1	1	1	0	0	1	1	UAPMB	FALSE
chr1	153280899	+	1	1	1	0	0	1	1	UAPMB	FALSE
chr1	153286622	+	1	1	1	0	0	1	1	UAPMB	FALSE
chr1	153658725	+	0	0	0	0	0	1	1	MB	FALSE
chr1	154672993	+	1	1	1	0	0	1	1	UAPMB	FALSE
chr1	154678715	+	1	1	1	0	0	0	1	UAPB	FALSE
chr1	157910687	+	1	1	1	0	0	1	1	UAPMB	FALSE
chr1	158571085	+	1	1	1	0	0	1	1	UAPMB	FALSE
chr1	161169664	+	1	0	1	0	0	1	1	UPMB	FALSE
chr1	161238514	+	0	1	1	0	0	1	1	APMB	FALSE
chr1	162880946	+	0	1	1	0	0	1	1	APMB	FALSE
chr1	162965859	+	0	1	1	0	0	1	1	APMB	FALSE
chr1	162965863	+	1	1	1	1	1	1	1	UAPRSMB	TRUE
chr1	162966090	+	1	1	1	1	0	1	1	UAPRMB	FALSE
chr1	162966230	+	0	0	0	1	1	0	1	RSB	FALSE
chr1	162966253	+	0	1	0	0	0	1	1	AMB	FALSE
chr1	162966256	+	1	1	0	1	1	1	1	UARSMB	FALSE
chr1	162966268	+	0	0	0	0	0	0	1	B	FALSE
chr1	162966269	+	0	0	0	1	1	1	1	RSMB	FALSE
chr1	162966270	+	0	1	0	1	1	1	1	ARSMB	FALSE
chr1	162966271	+	0	0	0	1	1	1	1	RSMB	FALSE
chr1	162966272	+	0	1	0	1	1	1	1	ARSMB	FALSE
chr1	162966275	+	0	1	0	0	0	1	1	AMB	FALSE
chr1	162966316	+	1	1	1	1	1	1	1	UAPRSMB	TRUE
chr1	162966317	+	0	0	1	1	0	1	1	PRMB	FALSE
chr1	162966318	+	0	1	1	1	1	1	1	APRSMB	FALSE
chr1	162966467	+	1	0	0	1	0	0	1	URB	FALSE
chr1	162966525	+	1	0	0	0	0	0	1	UB	FALSE
chr1	162966527	+	0	0	0	0	0	0	1	B	FALSE
chr1	162966530	+	1	0	0	0	0	0	1	UB	FALSE
chr1	162966655	+	0	1	1	1	0	1	1	APRMB	FALSE
chr1	162966921	+	1	1	1	1	1	1	1	UAPRSMB	TRUE
chr1	162966925	+	0	1	1	1	1	1	1	APRSMB	FALSE
chr1	162966928	+	0	1	1	1	0	1	1	APRMB	FALSE
chr1	162966930	+	0	0	1	0	0	0	1	PB	FALSE
chr1	162966933	+	0	0	1	0	0	0	1	PB	FALSE
chr1	162967230	+	0	1	1	0	0	0	1	APB	FALSE
chr1	162967635	+	0	0	0	0	0	0	1	B	FALSE
chr1	165869992	+	1	1	1	0	0	0	1	UAPB	FALSE
chr1	165870205	+	1	0	0	0	0	0	1	UB	FALSE
chr1	166186854	+	0	1	1	0	0	1	1	APMB	FALSE
chr1	166191110	+	0	0	0	0	0	0	1	B	FALSE
chr1	166193494	+	0	1	1	0	0	1	1	APMB	FALSE
chr1	166212495	+	0	0	1	0	0	0	1	PB	FALSE
chr1	167796957	+	0	1	0	1	0	0	1	ARB	FALSE
chr1	168319948	+	1	0	1	1	1	1	1	UPRSMB	TRUE
chr1	168322671	+	0	1	1	0	0	1	1	APMB	FALSE
chr1	169294609	+	1	1	1	0	0	1	1	UAPMB	FALSE
chr1	173287952	+	0	0	1	1	1	0	1	PRSB	FALSE
chr1	173287953	+	0	0	1	1	1	1	1	PRSMB	FALSE
chr1	173287958	+	0	0	1	1	0	0	1	PRB	FALSE
chr1	173287960	+	0	1	1	0	0	1	1	APMB	FALSE
chr1	173337474	+	1	0	1	0	0	1	1	UPMB	FALSE
chr1	173345602	+	1	1	1	0	0	0	1	UAPB	FALSE
chr1	174013123	+	0	0	0	0	0	0	1	B	FALSE
chr1	174036423	+	0	0	0	0	0	0	1	B	FALSE
chr1	174051260	+	1	1	0	0	0	1	1	UAMB	FALSE
chr1	174060722	+	1	1	1	0	0	1	1	UAPMB	FALSE
chr1	174063239	+	0	0	1	0	0	0	1	PB	FALSE
chr1	174117459	+	1	1	1	0	0	1	1	UAPMB	FALSE
chr1	174119039	+	0	1	1	1	1	1	1	APRSMB	FALSE
chr1	174428463	+	1	1	1	0	0	1	1	UAPMB	FALSE
chr1	175350947	+	0	1	0	0	0	0	1	AB	FALSE
chr1	176123026	+	1	1	1	1	0	1	1	UAPRMB	FALSE
chr1	176123599	+	1	1	1	0	0	1	1	UAPMB	FALSE
chr1	176147642	+	0	1	1	0	0	1	1	APMB	FALSE
chr1	176153363	+	1	1	1	0	0	1	1	UAPMB	FALSE
chr1	177838538	+	1	0	1	1	0	1	1	UPRMB	FALSE
chr1	182509269	+	0	1	1	0	0	1	1	APMB	FALSE
chr1	182522961	+	1	1	1	0	0	1	1	UAPMB	FALSE
chr1	182524148	+	1	0	1	0	0	0	1	UPB	FALSE
chr1	182599237	+	1	1	1	1	0	1	1	UAPRMB	FALSE
chr1	182667105	+	0	0	0	0	0	0	1	B	FALSE
chr1	182676900	+	1	0	1	0	0	1	1	UPMB	FALSE
chr1	182836270	+	1	1	1	0	0	1	1	UAPMB	FALSE
chr1	187091016	+	1	1	1	0	0	1	1	UAPMB	FALSE
chr1	187091034	+	1	0	1	0	0	0	1	UPB	FALSE
chr1	187106145	+	1	1	1	0	0	1	1	UAPMB	FALSE
chr1	187107235	+	1	1	1	0	0	0	1	UAPB	FALSE
chr1	187194742	+	0	1	1	0	0	1	1	APMB	FALSE
chr1	187203388	+	1	1	1	0	0	0	1	UAPB	FALSE
chr1	187210092	+	0	1	1	0	0	1	1	APMB	FALSE
chr1	187219880	+	1	0	1	0	0	1	1	UPMB	FALSE
chr1	187235010	+	1	1	1	0	0	1	1	UAPMB	FALSE
chr1	187235013	+	0	1	1	0	0	1	1	APMB	FALSE
chr1	187280204	+	1	1	1	0	0	1	1	UAPMB	FALSE
chr1	189057605	+	1	1	1	1	0	1	1	UAPRMB	FALSE
chr1	192761700	+	0	1	0	0	0	0	1	AB	FALSE
chr1	193437222	+	1	0	0	0	0	0	1	UB	FALSE
chr1	193646001	+	0	1	1	0	0	1	1	APMB	FALSE
chr1	194991939	+	1	1	1	0	0	0	1	UAPB	FALSE
chr10	6262826	-	1	1	1	0	0	0	1	UAPB	FALSE
chr10	7358595	-	0	1	0	0	0	0	1	AB	FALSE
chr10	9531856	-	0	1	1	1	0	1	1	APRMB	FALSE
chr10	12910570	-	1	1	1	0	0	1	1	UAPMB	FALSE
chr10	12911812	-	0	1	0	0	0	0	1	AB	FALSE
chr10	13244803	-	0	0	1	0	0	0	1	PB	FALSE
chr10	17732949	-	0	0	0	0	0	0	1	B	FALSE
chr10	17919856	-	0	1	1	0	0	1	1	APMB	FALSE
chr10	18317604	-	0	0	0	0	0	0	1	B	FALSE
chr10	18319122	-	0	1	1	0	0	1	1	APMB	FALSE
chr10	18380507	-	0	1	1	0	0	1	1	APMB	FALSE
chr10	18722853	-	1	1	1	0	0	1	1	UAPMB	FALSE
chr10	20874580	-	1	0	1	0	0	1	1	UPMB	FALSE
chr10	20876288	-	0	1	1	0	0	1	1	APMB	FALSE
chr10	23505100	-	1	1	1	0	0	0	1	UAPB	FALSE
chr10	23505502	-	1	1	1	1	1	1	1	UAPRSMB	TRUE
chr10	23505505	-	1	0	1	1	1	1	1	UPRSMB	TRUE
chr10	23505550	-	0	0	0	0	0	1	1	MB	FALSE
chr10	23505552	-	0	0	0	0	0	0	1	B	FALSE
chr10	23505831	-	0	1	1	1	1	1	1	APRSMB	FALSE
chr10	23506426	-	0	0	0	1	0	1	1	RMB	FALSE
chr10	23506449	-	0	1	0	0	0	1	1	AMB	FALSE
chr10	23506453	-	0	0	0	0	0	0	1	B	FALSE
chr10	23506865	-	1	1	1	1	1	0	1	UAPRSB	TRUE
chr10	24367931	-	0	1	1	0	0	1	1	APMB	FALSE
chr10	30309965	-	0	0	0	1	0	0	1	RB	FALSE
chr10	30328256	-	1	1	1	0	0	1	1	UAPMB	FALSE
chr10	39861381	-	1	0	0	0	0	0	1	UB	FALSE
chr10	39963724	-	1	1	1	0	0	1	1	UAPMB	FALSE
chr10	40953449	-	0	1	1	1	0	1	1	APRMB	FALSE
chr10	53342900	-	1	1	1	1	0	1	1	UAPRMB	FALSE
chr10	53627616	-	0	0	0	0	0	0	1	B	FALSE
chr10	53793870	-	0	0	0	0	0	0	1	B	FALSE
chr10	59413804	-	1	1	1	0	0	1	1	UAPMB	FALSE
chr10	60567397	-	1	1	1	1	0	1	1	UAPRMB	FALSE
chr10	61737375	-	1	1	1	0	0	0	1	UAPB	FALSE
chr10	61762044	-	0	1	1	0	0	1	1	APMB	FALSE
chr10	61897362	-	0	0	0	0	0	0	1	B	FALSE
chr10	62052695	-	1	1	1	0	0	1	1	UAPMB	FALSE
chr10	62052699	-	0	1	1	0	0	1	1	APMB	FALSE
chr10	62055909	-	0	1	1	0	0	1	1	APMB	FALSE
chr10	62055911	-	0	1	1	0	0	1	1	APMB	FALSE
chr10	62228825	-	0	1	1	0	0	1	1	APMB	FALSE
chr10	62478332	-	0	0	0	1	0	0	1	RB	FALSE
chr10	62480107	-	1	1	1	0	0	1	1	UAPMB	FALSE
chr10	67589526	-	1	1	1	0	0	0	1	UAPB	FALSE
chr10	67597854	-	0	0	0	0	0	0	1	B	FALSE
chr10	68807948	-	1	1	1	0	0	1	1	UAPMB	FALSE
chr10	68808698	-	0	0	0	0	0	0	1	B	FALSE
chr10	68809006	-	0	1	1	0	0	1	1	APMB	FALSE
chr10	70699806	-	1	1	1	1	1	1	1	UAPRSMB	TRUE
chr10	74972886	-	1	0	1	0	0	1	1	UPMB	FALSE
chr10	75109454	-	1	1	1	1	1	1	1	UAPRSMB	TRUE
chr10	75115907	-	1	1	1	0	0	0	1	UAPB	FALSE
chr10	75120386	-	0	1	0	0	0	0	1	AB	FALSE
chr10	75157346	-	0	1	0	0	0	0	1	AB	FALSE
chr10	75184308	-	1	0	1	0	0	1	1	UPMB	FALSE
chr10	75195279	-	0	1	1	0	0	1	1	APMB	FALSE
chr10	75197980	-	0	0	1	0	0	0	1	PB	FALSE
chr10	75200561	-	0	1	0	0	0	1	1	AMB	FALSE
chr10	75200822	-	0	0	0	0	0	0	1	B	FALSE
chr10	75202665	-	1	0	0	0	0	1	1	UMB	FALSE
chr10	75206103	-	1	1	1	0	0	1	1	UAPMB	FALSE
chr10	75208169	-	1	1	1	0	0	1	1	UAPMB	FALSE
chr10	75210746	-	1	1	1	0	0	0	1	UAPB	FALSE
chr10	75217132	-	1	1	1	0	0	1	1	UAPMB	FALSE
chr10	75260669	-	1	1	0	1	0	0	1	UARB	FALSE
chr10	75322311	-	0	0	1	0	0	0	1	PB	FALSE
chr10	75367358	-	0	1	1	0	0	1	1	APMB	FALSE
chr10	75837505	-	0	1	0	0	0	1	1	AMB	FALSE
chr10	75847454	-	0	0	0	0	0	0	1	B	FALSE
chr10	75847673	-	1	0	1	0	0	0	1	UPB	FALSE
chr10	75872403	-	1	1	1	1	0	1	1	UAPRMB	FALSE
chr10	75885992	-	1	1	1	0	0	0	1	UAPB	FALSE
chr10	75896547	-	1	0	1	0	0	1	1	UPMB	FALSE
chr10	75899980	-	0	1	1	0	0	1	1	APMB	FALSE
chr10	76516171	-	1	1	1	0	0	0	1	UAPB	FALSE
chr10	76541285	-	1	1	1	0	0	1	1	UAPMB	FALSE
chr10	76548164	-	0	1	1	0	0	1	1	APMB	FALSE
chr10	77406752	-	0	0	1	0	0	1	1	PMB	FALSE
chr10	77451730	-	0	1	1	0	0	1	1	APMB	FALSE
chr10	77452540	-	0	0	0	1	0	0	1	RB	FALSE
chr10	77453599	-	0	1	1	0	0	1	1	APMB	FALSE
chr10	77454850	-	1	1	1	0	0	0	1	UAPB	FALSE
chr10	77455309	-	1	1	1	1	1	1	1	UAPRSMB	TRUE
chr10	77462945	-	0	1	1	0	0	1	1	APMB	FALSE
chr10	77468278	-	0	0	1	0	0	1	1	PMB	FALSE
chr10	77625475	-	0	1	1	0	0	1	1	APMB	FALSE
chr10	77632188	-	0	1	1	1	0	1	1	APRMB	FALSE
chr10	77639898	-	0	1	1	0	0	1	1	APMB	FALSE
chr10	77643042	-	0	0	1	1	1	0	1	PRSB	FALSE
chr10	77651717	-	1	1	1	0	0	1	1	UAPMB	FALSE
chr10	77659223	-	0	1	1	0	0	0	1	APB	FALSE
chr10	77865045	-	0	0	0	0	0	0	1	B	FALSE
chr10	77866344	-	0	0	1	1	0	0	1	PRB	FALSE
chr10	77866350	-	0	0	1	0	0	1	1	PMB	FALSE
chr10	77871730	-	0	0	0	0	0	1	1	MB	FALSE
chr10	77874231	-	0	0	0	0	0	0	1	B	FALSE
chr10	77903677	-	1	1	1	0	0	1	1	UAPMB	FALSE
chr10	77910763	-	0	0	1	0	0	0	1	PB	FALSE
chr10	79007620	-	0	1	0	0	0	0	1	AB	FALSE
chr10	79200656	-	0	0	1	0	0	0	1	PB	FALSE
chr10	79201579	-	1	1	1	0	0	0	1	UAPB	FALSE
chr10	79208333	-	0	0	0	0	0	0	1	B	FALSE
chr10	79225467	-	1	1	1	0	0	0	1	UAPB	FALSE
chr10	79440858	-	0	0	1	0	0	0	1	PB	FALSE
chr10	79440892	-	0	0	0	0	0	0	1	B	FALSE
chr10	79441266	-	0	0	1	0	0	0	1	PB	FALSE
chr10	79441736	-	0	1	0	0	0	1	1	AMB	FALSE
chr10	79442526	-	1	1	1	0	0	0	1	UAPB	FALSE
chr10	79499364	-	0	0	1	1	1	1	1	PRSMB	FALSE
chr10	79499365	-	0	0	1	1	1	0	1	PRSB	FALSE
chr10	79499376	-	0	0	1	0	0	0	1	PB	FALSE
chr10	79499755	-	1	1	1	1	1	1	1	UAPRSMB	TRUE
chr10	79500158	-	0	1	1	0	0	1	1	APMB	FALSE
chr10	79501385	-	1	1	1	1	1	1	1	UAPRSMB	TRUE
chr10	79520898	-	0	0	0	1	0	0	1	RB	FALSE
chr10	79520911	-	1	1	1	0	0	1	1	UAPMB	FALSE
chr10	79523009	-	0	0	1	0	0	0	1	PB	FALSE
chr10	79529472	-	0	1	1	0	0	1	1	APMB	FALSE
chr10	79532821	-	1	1	1	0	0	1	1	UAPMB	FALSE
chr10	79782311	-	1	1	1	1	1	1	1	UAPRSMB	TRUE
chr10	79804713	-	0	0	1	0	0	0	1	PB	FALSE
chr10	79804715	-	0	0	1	1	0	0	1	PRB	FALSE
chr10	79807385	-	0	1	0	0	0	0	1	AB	FALSE
chr10	79810114	-	0	1	1	0	0	1	1	APMB	FALSE
chr10	79856840	-	1	1	1	1	1	1	1	UAPRSMB	TRUE
chr10	79857961	-	1	1	1	1	0	1	1	UAPRMB	FALSE
chr10	79873047	-	1	0	1	1	1	0	1	UPRSB	TRUE
chr10	79876099	-	0	1	1	1	0	0	1	APRB	FALSE
chr10	79878291	-	0	1	1	0	0	1	1	APMB	FALSE
chr10	79878695	-	0	0	1	1	1	0	1	PRSB	FALSE
chr10	79879164	-	1	0	0	0	0	0	1	UB	FALSE
chr10	79882369	-	0	1	1	0	0	1	1	APMB	FALSE
chr10	80006899	-	0	1	1	0	0	1	1	APMB	FALSE
chr10	80006903	-	0	1	1	0	0	1	1	APMB	FALSE
chr10	80010755	-	0	1	1	0	0	1	1	APMB	FALSE
chr10	80049166	-	0	0	0	0	0	0	1	B	FALSE
chr10	80130099	-	1	1	1	0	0	1	1	UAPMB	FALSE
chr10	80131806	-	0	1	1	1	0	1	1	APRMB	FALSE
chr10	80132167	-	0	1	1	1	0	1	1	APRMB	FALSE
chr10	80132476	-	1	1	1	0	0	0	1	UAPB	FALSE
chr10	80171338	-	0	0	1	0	0	0	1	PB	FALSE
chr10	80171339	-	0	0	1	1	1	0	1	PRSB	FALSE
chr10	80171635	-	0	1	1	1	0	1	1	APRMB	FALSE
chr10	80172045	-	1	0	1	0	0	1	1	UPMB	FALSE
chr10	80173234	-	1	1	1	1	1	1	1	UAPRSMB	TRUE
chr10	80173595	-	0	1	1	1	1	1	1	APRSMB	FALSE
chr10	80174973	-	1	1	1	0	0	0	1	UAPB	FALSE
chr10	80175699	-	1	1	1	1	1	1	1	UAPRSMB	TRUE
chr10	80176408	-	0	0	1	0	0	0	1	PB	FALSE
chr10	80177092	-	0	1	1	0	0	1	1	APMB	FALSE
chr10	80177945	-	1	1	1	0	0	1	1	UAPMB	FALSE
chr10	80182151	-	0	1	1	0	0	1	1	APMB	FALSE
chr10	80183937	-	1	1	1	0	0	1	1	UAPMB	FALSE
chr10	80185744	-	0	1	1	0	0	1	1	APMB	FALSE
chr10	80186600	-	1	1	1	0	0	0	1	UAPB	FALSE
chr10	80317200	-	0	1	0	0	0	1	1	AMB	FALSE
chr10	80363028	-	0	1	1	0	0	0	1	APB	FALSE
chr10	80366086	-	1	1	1	0	0	1	1	UAPMB	FALSE
chr10	80370039	-	1	1	1	1	1	1	1	UAPRSMB	TRUE
chr10	80510279	-	0	0	0	0	0	0	1	B	FALSE
chr10	80510446	-	1	1	1	1	0	1	1	UAPRMB	FALSE
chr10	80512656	-	1	0	1	1	1	0	1	UPRSB	TRUE
chr10	80512658	-	1	0	1	0	0	0	1	UPB	FALSE
chr10	80620777	-	1	1	1	0	0	1	1	UAPMB	FALSE
chr10	80620781	-	1	0	1	0	0	0	1	UPB	FALSE
chr10	80830501	-	0	0	1	0	0	0	1	PB	FALSE
chr10	80833600	-	1	1	1	0	0	1	1	UAPMB	FALSE
chr10	80863857	-	1	1	1	0	0	1	1	UAPMB	FALSE
chr10	80952886	-	1	1	1	0	0	1	1	UAPMB	FALSE
chr10	80954821	-	1	1	1	0	0	1	1	UAPMB	FALSE
chr10	80954824	-	1	0	1	0	0	1	1	UPMB	FALSE
chr10	80956312	-	1	1	1	1	0	1	1	UAPRMB	FALSE
chr10	80970845	-	0	0	1	1	0	0	1	PRB	FALSE
chr10	80993746	-	0	1	1	0	0	1	1	APMB	FALSE
chr10	81061907	-	0	0	1	0	0	0	1	PB	FALSE
chr10	81085641	-	0	1	1	0	0	0	1	APB	FALSE
chr10	81085657	-	0	0	1	0	0	0	1	PB	FALSE
chr10	83084522	-	0	1	1	0	0	1	1	APMB	FALSE
chr10	84613866	-	0	1	0	0	0	0	1	AB	FALSE
chr10	85356209	-	0	1	1	0	0	1	1	APMB	FALSE
chr10	86153896	-	1	0	1	0	0	1	1	UPMB	FALSE
chr10	86156282	-	1	0	1	1	1	1	1	UPRSMB	TRUE
chr10	86158730	-	0	1	1	1	0	1	1	APRMB	FALSE
chr10	86165771	-	0	1	0	0	0	0	1	AB	FALSE
chr10	86166376	-	1	1	1	0	0	1	1	UAPMB	FALSE
chr10	86331970	-	0	1	1	0	0	1	1	APMB	FALSE
chr10	87602862	-	1	0	1	0	0	1	1	UPMB	FALSE
chr10	88209830	-	0	1	1	0	0	1	1	APMB	FALSE
chr10	88210186	-	1	1	1	0	0	1	1	UAPMB	FALSE
chr10	88228272	-	1	1	1	1	0	1	1	UAPRMB	FALSE
chr10	88228279	-	0	0	1	1	0	0	1	PRB	FALSE
chr10	88233590	-	1	1	1	0	0	1	1	UAPMB	FALSE
chr10	88240851	-	0	0	0	0	0	1	1	MB	FALSE
chr10	88241217	-	1	1	1	0	0	1	1	UAPMB	FALSE
chr10	88268964	-	0	1	1	0	0	1	1	APMB	FALSE
chr10	88278717	-	1	1	1	0	0	0	1	UAPB	FALSE
chr10	88284836	-	1	1	1	1	0	0	1	UAPRB	FALSE
chr10	90586475	-	0	0	1	0	0	0	1	PB	FALSE
chr10	90586476	-	0	1	1	0	0	1	1	APMB	FALSE
chr10	90586477	-	0	0	1	0	0	1	1	PMB	FALSE
chr10	90586509	-	0	0	1	1	0	1	1	PRMB	FALSE
chr10	90626664	-	0	1	0	0	0	1	1	AMB	FALSE
chr10	92154805	-	0	1	1	0	0	1	1	APMB	FALSE
chr10	93046298	-	1	1	1	1	1	1	1	UAPRSMB	TRUE
chr10	93325021	-	0	1	0	0	0	0	1	AB	FALSE
chr10	94329413	-	0	1	0	0	0	1	1	AMB	FALSE
chr10	95012146	-	1	1	1	0	0	1	1	UAPMB	FALSE
chr10	110384466	-	0	0	1	0	0	0	1	PB	FALSE
chr10	110387533	-	0	1	0	1	0	0	1	ARB	FALSE
chr10	111423496	-	0	0	0	0	0	0	1	B	FALSE
chr10	114636852	-	1	0	1	0	0	1	1	UPMB	FALSE
chr10	114646745	-	1	1	1	1	0	1	1	UAPRMB	FALSE
chr10	114649618	-	0	0	0	0	0	1	1	MB	FALSE
chr10	115935010	-	0	1	0	0	0	0	1	AB	FALSE
chr10	116488366	-	1	1	1	1	0	1	1	UAPRMB	FALSE
chr10	116492291	-	0	0	0	0	0	0	1	B	FALSE
chr10	116492308	-	1	1	1	0	0	1	1	UAPMB	FALSE
chr10	116493242	-	0	1	1	1	1	1	1	APRSMB	FALSE
chr10	116494354	-	0	1	1	0	0	1	1	APMB	FALSE
chr10	116494998	-	1	1	1	1	1	0	1	UAPRSB	TRUE
chr10	116495274	-	1	0	1	0	0	1	1	UPMB	FALSE
chr10	116500132	-	0	1	1	0	0	1	1	APMB	FALSE
chr10	116657677	-	0	1	1	0	0	0	1	APB	FALSE
chr10	116799267	-	1	0	1	0	0	1	1	UPMB	FALSE
chr10	117129521	-	0	0	0	0	0	0	1	B	FALSE
chr10	117138706	-	1	1	1	0	0	0	1	UAPB	FALSE
chr10	117142107	-	0	1	0	0	0	0	1	AB	FALSE
chr10	117142313	-	0	1	1	0	0	1	1	APMB	FALSE
chr10	117173303	-	1	1	1	0	0	1	1	UAPMB	FALSE
chr10	117207326	-	1	1	1	1	1	1	1	UAPRSMB	TRUE
chr10	117209978	-	0	0	0	0	0	1	1	MB	FALSE
chr10	118640284	-	1	1	1	0	0	1	1	UAPMB	FALSE
chr10	118656501	-	0	1	0	0	0	0	1	AB	FALSE
chr10	119532265	-	1	1	1	0	0	1	1	UAPMB	FALSE
chr10	120850167	-	0	0	1	0	0	0	1	PB	FALSE
chr10	121013483	-	0	1	1	0	0	1	1	APMB	FALSE
chr10	121015471	-	0	1	0	0	0	0	1	AB	FALSE
chr10	121039495	-	1	1	1	0	0	1	1	UAPMB	FALSE
chr10	121039502	-	0	0	1	0	0	0	1	PB	FALSE
chr10	121043919	-	0	1	1	1	1	1	1	APRSMB	FALSE
chr10	121043923	-	0	1	1	1	0	1	1	APRMB	FALSE
chr10	122472660	-	0	0	0	0	0	0	1	B	FALSE
chr10	126537062	-	1	1	1	1	0	1	1	UAPRMB	FALSE
chr10	126556286	-	1	1	1	0	0	1	1	UAPMB	FALSE
chr10	126556553	-	1	1	1	1	0	1	1	UAPRMB	FALSE
chr10	126721564	-	0	1	1	0	0	1	1	APMB	FALSE
chr10	126723652	-	1	1	1	0	0	0	1	UAPB	FALSE
chr10	126733514	-	1	1	1	1	1	1	1	UAPRSMB	TRUE
chr10	126733709	-	0	1	1	1	1	1	1	APRSMB	FALSE
chr10	126737663	-	1	0	1	0	0	0	1	UPB	FALSE
chr10	126737695	-	1	1	1	0	0	1	1	UAPMB	FALSE
chr10	126956889	-	0	1	0	0	0	0	1	AB	FALSE
chr10	126957489	-	1	0	1	0	0	0	1	UPB	FALSE
chr10	126957495	-	1	1	1	0	0	1	1	UAPMB	FALSE
chr10	126958192	-	1	1	1	0	0	1	1	UAPMB	FALSE
chr10	126980029	-	0	0	0	0	0	0	1	B	FALSE
chr10	127006110	-	1	1	1	0	0	1	1	UAPMB	FALSE
chr10	127845724	-	0	0	0	0	0	0	1	B	FALSE
chr10	127954473	-	1	1	1	1	1	1	1	UAPRSMB	TRUE
chr10	127985508	-	0	1	1	1	1	1	1	APRSMB	FALSE
chr10	127985509	-	0	0	1	0	0	1	1	PMB	FALSE
chr10	127985609	-	0	0	0	0	0	0	1	B	FALSE
chr10	127985775	-	1	1	1	1	1	1	1	UAPRSMB	TRUE
chr10	127985910	-	0	0	0	0	0	0	1	B	FALSE
chr10	127986055	-	1	1	1	1	1	1	1	UAPRSMB	TRUE
chr10	128000001	-	0	1	1	1	0	1	1	APRMB	FALSE
chr10	128002650	-	0	0	0	0	0	1	1	MB	FALSE
chr10	128002653	-	0	0	0	0	0	0	1	B	FALSE
chr10	128063007	-	0	0	0	0	0	1	1	MB	FALSE
chr10	128063397	-	0	0	0	0	0	0	1	B	FALSE
chr10	128141095	-	1	1	1	0	0	1	1	UAPMB	FALSE
chr10	128165430	-	1	0	1	0	0	1	1	UPMB	FALSE
chr10	128173631	-	0	0	0	1	1	0	1	RSB	FALSE
chr10	4541422	+	0	0	0	0	0	0	1	B	FALSE
chr10	5246918	+	0	0	1	0	0	0	1	PB	FALSE
chr10	5304931	+	0	1	1	0	0	0	1	APB	FALSE
chr10	7480509	+	1	0	1	0	0	1	1	UPMB	FALSE
chr10	10871384	+	0	1	1	1	0	1	1	APRMB	FALSE
chr10	10881882	+	0	1	1	0	0	1	1	APMB	FALSE
chr10	10889750	+	0	0	1	0	0	0	1	PB	FALSE
chr10	10912485	+	0	0	0	0	0	0	1	B	FALSE
chr10	10933202	+	1	1	1	1	0	1	1	UAPRMB	FALSE
chr10	21715599	+	0	0	0	0	0	0	1	B	FALSE
chr10	21716339	+	1	1	1	0	0	1	1	UAPMB	FALSE
chr10	21716755	+	1	1	1	0	0	1	1	UAPMB	FALSE
chr10	23901294	+	0	1	1	1	0	1	1	APRMB	FALSE
chr10	23901568	+	0	0	0	0	0	0	1	B	FALSE
chr10	24590238	+	0	1	1	0	0	1	1	APMB	FALSE
chr10	24602932	+	1	1	0	0	0	1	1	UAMB	FALSE
chr10	24610912	+	1	1	0	0	0	1	1	UAMB	FALSE
chr10	24629798	+	0	0	0	0	0	0	1	B	FALSE
chr10	25199448	+	1	1	1	1	1	1	1	UAPRSMB	TRUE
chr10	39547495	+	0	1	1	0	0	1	1	APMB	FALSE
chr10	39560879	+	0	1	0	0	0	0	1	AB	FALSE
chr10	40196669	+	1	1	1	0	0	0	1	UAPB	FALSE
chr10	41199402	+	1	0	1	0	0	0	1	UPB	FALSE
chr10	41203951	+	1	0	1	1	1	0	1	UPRSB	TRUE
chr10	41203952	+	0	0	1	0	0	1	1	PMB	FALSE
chr10	41206151	+	0	0	1	0	0	0	1	PB	FALSE
chr10	41206152	+	0	0	1	0	0	0	1	PB	FALSE
chr10	41248450	+	1	1	1	1	1	1	1	UAPRSMB	TRUE
chr10	42524848	+	1	0	1	0	0	1	1	UPMB	FALSE
chr10	42548673	+	1	1	1	0	0	0	1	UAPB	FALSE
chr10	43299272	+	0	1	0	0	0	0	1	AB	FALSE
chr10	43655780	+	1	1	1	1	1	1	1	UAPRSMB	TRUE
chr10	45429686	+	0	0	0	0	0	0	1	B	FALSE
chr10	50365442	+	1	0	1	0	0	1	1	UPMB	FALSE
chr10	50487132	+	0	0	1	0	0	1	1	PMB	FALSE
chr10	51200866	+	1	1	0	0	0	1	1	UAMB	FALSE
chr10	52036811	+	1	0	1	0	0	0	1	UPB	FALSE
chr10	57731988	+	1	0	1	0	0	1	1	UPMB	FALSE
chr10	57744077	+	1	1	1	0	0	1	1	UAPMB	FALSE
chr10	57872561	+	0	0	0	0	0	0	1	B	FALSE
chr10	57881127	+	1	0	1	0	0	1	1	UPMB	FALSE
chr10	57881616	+	0	0	0	0	0	0	1	B	FALSE
chr10	57937957	+	1	1	1	0	0	1	1	UAPMB	FALSE
chr10	58806381	+	0	1	1	0	0	1	1	APMB	FALSE
chr10	58833723	+	0	1	1	0	0	1	1	APMB	FALSE
chr10	59251626	+	0	0	0	1	0	0	1	RB	FALSE
chr10	59302399	+	1	1	1	0	0	1	1	UAPMB	FALSE
chr10	59353567	+	0	1	1	0	0	1	1	APMB	FALSE
chr10	59757684	+	0	0	1	1	0	0	1	PRB	FALSE
chr10	59761824	+	0	1	1	0	0	1	1	APMB	FALSE
chr10	59761973	+	0	1	0	0	0	0	1	AB	FALSE
chr10	59761977	+	1	0	0	1	1	0	1	URSB	FALSE
chr10	60885695	+	1	1	1	0	0	0	1	UAPB	FALSE
chr10	61010769	+	1	1	1	0	0	0	1	UAPB	FALSE
chr10	61164763	+	1	1	1	0	0	0	1	UAPB	FALSE
chr10	62422228	+	0	1	0	0	0	0	1	AB	FALSE
chr10	62424146	+	0	1	1	1	0	1	1	APRMB	FALSE
chr10	62456125	+	0	0	0	0	0	0	1	B	FALSE
chr10	62737715	+	0	1	1	0	0	1	1	APMB	FALSE
chr10	62748738	+	1	1	1	1	0	1	1	UAPRMB	FALSE
chr10	62770849	+	0	0	0	0	0	0	1	B	FALSE
chr10	62774563	+	0	1	1	1	0	1	1	APRMB	FALSE
chr10	66694682	+	1	1	1	0	0	1	1	UAPMB	FALSE
chr10	66700834	+	0	1	1	0	0	1	1	APMB	FALSE
chr10	70844805	+	0	1	0	0	0	1	1	AMB	FALSE
chr10	72118708	+	0	1	1	0	0	1	1	APMB	FALSE
chr10	72119755	+	0	0	1	0	0	1	1	PMB	FALSE
chr10	72119764	+	1	1	1	0	0	1	1	UAPMB	FALSE
chr10	72119768	+	0	1	1	1	1	1	1	APRSMB	FALSE
chr10	74598614	+	0	1	1	1	1	1	1	APRSMB	FALSE
chr10	74623053	+	1	1	1	0	0	1	1	UAPMB	FALSE
chr10	74720767	+	0	0	0	0	0	0	1	B	FALSE
chr10	74980979	+	0	0	0	0	0	1	1	MB	FALSE
chr10	74982035	+	1	1	1	0	0	0	1	UAPB	FALSE
chr10	75398897	+	1	0	0	0	0	1	1	UMB	FALSE
chr10	75400025	+	1	1	1	0	0	0	1	UAPB	FALSE
chr10	75495603	+	0	0	0	0	0	0	1	B	FALSE
chr10	75851869	+	0	0	0	0	0	0	1	B	FALSE
chr10	75851940	+	0	0	0	1	1	0	1	RSB	FALSE
chr10	75934136	+	0	1	1	0	0	1	1	APMB	FALSE
chr10	75965373	+	1	1	1	0	0	1	1	UAPMB	FALSE
chr10	75971014	+	0	1	1	0	0	0	1	APB	FALSE
chr10	75975138	+	1	1	1	0	0	1	1	UAPMB	FALSE
chr10	75998563	+	0	0	0	0	0	0	1	B	FALSE
chr10	76001069	+	1	1	1	1	0	1	1	UAPRMB	FALSE
chr10	76009481	+	1	1	1	0	0	1	1	UAPMB	FALSE
chr10	77516628	+	0	1	1	0	0	1	1	APMB	FALSE
chr10	77890028	+	1	1	1	0	0	1	1	UAPMB	FALSE
chr10	79146153	+	1	0	0	0	0	0	1	UB	FALSE
chr10	79172391	+	1	1	1	1	1	1	1	UAPRSMB	TRUE
chr10	79172986	+	0	1	1	0	0	0	1	APB	FALSE
chr10	79173231	+	0	0	0	1	0	0	1	RB	FALSE
chr10	79174183	+	0	0	1	0	0	0	1	PB	FALSE
chr10	79319236	+	1	0	1	0	0	1	1	UPMB	FALSE
chr10	79321672	+	0	0	1	1	1	0	1	PRSB	FALSE
chr10	79321675	+	0	1	1	1	0	1	1	APRMB	FALSE
chr10	79323544	+	1	1	1	1	1	1	1	UAPRSMB	TRUE
chr10	79324430	+	1	1	0	0	0	0	1	UAB	FALSE
chr10	79324454	+	0	0	0	1	0	0	1	RB	FALSE
chr10	79324455	+	0	0	0	1	1	0	1	RSB	FALSE
chr10	79324456	+	0	0	0	1	0	0	1	RB	FALSE
chr10	79325698	+	0	0	1	0	0	0	1	PB	FALSE
chr10	79393353	+	1	1	1	0	0	0	1	UAPB	FALSE
chr10	79394482	+	1	1	1	0	0	0	1	UAPB	FALSE
chr10	79411575	+	0	1	1	0	0	0	1	APB	FALSE
chr10	79427936	+	1	1	1	1	1	1	1	UAPRSMB	TRUE
chr10	79429281	+	1	1	1	1	1	1	1	UAPRSMB	TRUE
chr10	79438904	+	0	0	0	0	0	0	1	B	FALSE
chr10	79439114	+	1	0	1	0	0	1	1	UPMB	FALSE
chr10	79454087	+	0	1	1	0	0	0	1	APB	FALSE
chr10	79460740	+	0	1	1	0	0	0	1	APB	FALSE
chr10	79469539	+	0	0	0	0	0	0	1	B	FALSE
chr10	79477997	+	1	1	1	0	0	1	1	UAPMB	FALSE
chr10	79484310	+	0	0	0	0	0	0	1	B	FALSE
chr10	79517421	+	0	1	1	1	0	1	1	APRMB	FALSE
chr10	79517684	+	1	1	1	1	0	1	1	UAPRMB	FALSE
chr10	79587527	+	1	1	1	0	0	1	1	UAPMB	FALSE
chr10	79587769	+	0	0	0	0	0	0	1	B	FALSE
chr10	79588214	+	1	1	0	1	1	1	1	UARSMB	FALSE
chr10	79589378	+	1	1	1	1	1	0	1	UAPRSB	TRUE
chr10	79632987	+	0	1	0	0	0	1	1	AMB	FALSE
chr10	79696945	+	0	1	1	1	0	1	1	APRMB	FALSE
chr10	79704101	+	1	0	0	0	0	0	1	UB	FALSE
chr10	79736728	+	1	1	1	0	0	0	1	UAPB	FALSE
chr10	79737159	+	0	0	1	0	0	0	1	PB	FALSE
chr10	79737163	+	0	1	1	0	0	1	1	APMB	FALSE
chr10	79740959	+	0	1	1	0	0	1	1	APMB	FALSE
chr10	79740963	+	0	1	1	0	0	0	1	APB	FALSE
chr10	79745748	+	1	1	1	0	0	1	1	UAPMB	FALSE
chr10	79755373	+	0	0	0	0	0	0	1	B	FALSE
chr10	79755377	+	0	0	0	0	0	0	1	B	FALSE
chr10	79756366	+	0	1	1	0	0	1	1	APMB	FALSE
chr10	79756367	+	0	1	1	0	0	1	1	APMB	FALSE
chr10	79768249	+	0	0	1	1	1	0	1	PRSB	FALSE
chr10	79796710	+	0	0	0	0	0	0	1	B	FALSE
chr10	80072053	+	1	0	1	1	1	0	1	UPRSB	TRUE
chr10	80075059	+	1	1	1	0	0	0	1	UAPB	FALSE
chr10	80077322	+	0	0	1	0	0	0	1	PB	FALSE
chr10	80097495	+	0	1	0	0	0	0	1	AB	FALSE
chr10	80100611	+	1	1	1	0	0	0	1	UAPB	FALSE
chr10	80100957	+	0	0	0	0	0	1	1	MB	FALSE
chr10	80231323	+	0	1	1	0	0	0	1	APB	FALSE
chr10	80244094	+	1	0	1	0	0	1	1	UPMB	FALSE
chr10	80246146	+	1	1	1	0	0	1	1	UAPMB	FALSE
chr10	80247283	+	1	0	1	0	0	1	1	UPMB	FALSE
chr10	80248218	+	1	1	1	0	0	1	1	UAPMB	FALSE
chr10	80253039	+	1	1	1	0	0	0	1	UAPB	FALSE
chr10	80253332	+	1	1	1	0	0	1	1	UAPMB	FALSE
chr10	80265116	+	0	1	1	1	1	1	1	APRSMB	FALSE
chr10	80325676	+	1	1	1	0	0	0	1	UAPB	FALSE
chr10	80328262	+	0	0	0	0	0	0	1	B	FALSE
chr10	80328779	+	1	0	1	0	0	0	1	UPB	FALSE
chr10	80330123	+	0	0	1	1	1	0	1	PRSB	FALSE
chr10	80538231	+	1	1	1	0	0	1	1	UAPMB	FALSE
chr10	80540637	+	0	0	1	0	0	0	1	PB	FALSE
chr10	80540862	+	0	0	0	0	0	1	1	MB	FALSE
chr10	80541192	+	1	1	1	1	0	1	1	UAPRMB	FALSE
chr10	80543135	+	1	0	1	1	1	1	1	UPRSMB	TRUE
chr10	80544592	+	0	0	1	1	0	0	1	PRB	FALSE
chr10	80577751	+	1	0	1	1	1	1	1	UPRSMB	TRUE
chr10	80578019	+	0	0	0	0	0	0	1	B	FALSE
chr10	80580871	+	1	0	1	0	0	0	1	UPB	FALSE
chr10	80586343	+	1	1	1	1	1	1	1	UAPRSMB	TRUE
chr10	80610697	+	1	0	1	0	0	1	1	UPMB	FALSE
chr10	80640382	+	0	1	1	0	0	0	1	APB	FALSE
chr10	80640384	+	0	0	1	0	0	0	1	PB	FALSE
chr10	80641805	+	1	1	1	0	0	1	1	UAPMB	FALSE
chr10	80643294	+	1	1	1	0	0	1	1	UAPMB	FALSE
chr10	80643295	+	1	0	1	0	0	1	1	UPMB	FALSE
chr10	80643526	+	0	0	1	0	0	0	1	PB	FALSE
chr10	80644037	+	1	0	0	0	0	1	1	UMB	FALSE
chr10	80773407	+	1	1	1	0	0	0	1	UAPB	FALSE
chr10	80774693	+	1	1	1	0	0	0	1	UAPB	FALSE
chr10	80777711	+	1	1	1	1	1	1	1	UAPRSMB	TRUE
chr10	82104039	+	0	1	1	0	0	1	1	APMB	FALSE
chr10	82201704	+	0	1	1	0	0	1	1	APMB	FALSE
chr10	82338347	+	0	1	1	0	0	1	1	APMB	FALSE
chr10	82342477	+	1	1	1	1	1	1	1	UAPRSMB	TRUE
chr10	82342746	+	0	1	0	0	0	0	1	AB	FALSE
chr10	82347220	+	1	0	0	0	0	1	1	UMB	FALSE
chr10	82347664	+	1	1	1	0	0	0	1	UAPB	FALSE
chr10	82823219	+	0	0	0	0	0	0	1	B	FALSE
chr10	82824760	+	0	0	1	0	0	0	1	PB	FALSE
chr10	83042191	+	0	1	1	0	0	0	1	APB	FALSE
chr10	83054100	+	1	0	0	0	0	0	1	UB	FALSE
chr10	84095182	+	1	1	1	0	0	1	1	UAPMB	FALSE
chr10	85345820	+	0	0	0	0	0	0	1	B	FALSE
chr10	85496201	+	0	1	0	1	1	0	1	ARSB	FALSE
chr10	86283903	+	0	0	0	0	0	0	1	B	FALSE
chr10	87610870	+	0	0	1	0	0	0	1	PB	FALSE
chr10	87610878	+	0	1	1	0	0	1	1	APMB	FALSE
chr10	87623600	+	1	1	1	0	0	1	1	UAPMB	FALSE
chr10	89272925	+	0	1	0	1	0	1	1	ARMB	FALSE
chr10	92674979	+	0	0	0	0	0	1	1	MB	FALSE
chr10	92698141	+	1	1	1	0	0	1	1	UAPMB	FALSE
chr10	92937632	+	0	0	1	0	0	0	1	PB	FALSE
chr10	93602447	+	0	0	1	0	0	0	1	PB	FALSE
chr10	93630353	+	1	1	1	0	0	0	1	UAPB	FALSE
chr10	94231532	+	0	1	1	0	0	1	1	APMB	FALSE
chr10	96080879	+	1	1	1	0	0	1	1	UAPMB	FALSE
chr10	98617670	+	0	1	1	0	0	1	1	APMB	FALSE
chr10	107687945	+	1	0	1	0	0	0	1	UPB	FALSE
chr10	107697015	+	1	0	0	0	0	0	1	UB	FALSE
chr10	107698273	+	1	0	1	0	0	1	1	UPMB	FALSE
chr10	107828731	+	1	1	1	0	0	0	1	UAPB	FALSE
chr10	110204151	+	1	1	1	0	0	0	1	UAPB	FALSE
chr10	110714277	+	1	1	1	0	0	0	1	UAPB	FALSE
chr10	110927409	+	1	1	1	1	1	1	1	UAPRSMB	TRUE
chr10	110930581	+	1	1	1	1	0	0	1	UAPRB	FALSE
chr10	110931206	+	1	1	1	1	0	0	1	UAPRB	FALSE
chr10	110931210	+	1	1	1	1	1	0	1	UAPRSB	TRUE
chr10	111416118	+	1	1	1	0	0	1	1	UAPMB	FALSE
chr10	111417215	+	0	0	0	0	0	0	1	B	FALSE
chr10	114843760	+	1	1	1	0	0	1	1	UAPMB	FALSE
chr10	114848234	+	1	1	1	0	0	1	1	UAPMB	FALSE
chr10	114852265	+	0	1	1	0	0	1	1	APMB	FALSE
chr10	114864068	+	1	1	1	0	0	1	1	UAPMB	FALSE
chr10	114864367	+	0	0	0	0	0	1	1	MB	FALSE
chr10	114868755	+	0	1	0	0	0	1	1	AMB	FALSE
chr10	114869336	+	0	0	0	0	0	0	1	B	FALSE
chr10	117594222	+	0	1	1	0	0	0	1	APB	FALSE
chr10	117595330	+	0	1	1	0	0	1	1	APMB	FALSE
chr10	126429626	+	0	1	1	0	0	1	1	APMB	FALSE
chr10	126430042	+	1	1	1	0	0	1	1	UAPMB	FALSE
chr10	126430045	+	0	1	1	0	0	0	1	APB	FALSE
chr10	126522149	+	1	0	1	0	0	0	1	UPB	FALSE
chr10	126712024	+	1	1	1	0	0	1	1	UAPMB	FALSE
chr10	126712028	+	1	1	1	0	0	0	1	UAPB	FALSE
chr10	126712858	+	0	0	1	0	0	0	1	PB	FALSE
chr10	126712860	+	0	1	1	0	0	1	1	APMB	FALSE
chr10	126712875	+	1	0	0	0	0	1	1	UMB	FALSE
chr10	126715146	+	1	0	1	1	1	1	1	UPRSMB	TRUE
chr10	126728098	+	0	0	0	0	0	1	1	MB	FALSE
chr10	126730761	+	0	0	0	0	0	0	1	B	FALSE
chr10	126732738	+	1	1	1	0	0	0	1	UAPB	FALSE
chr10	126766520	+	1	1	1	0	0	1	1	UAPMB	FALSE
chr10	126895163	+	0	1	1	0	0	1	1	APMB	FALSE
chr10	126895842	+	1	0	1	1	1	1	1	UPRSMB	TRUE
chr10	127083921	+	0	0	1	0	0	0	1	PB	FALSE
chr10	127088193	+	0	1	1	0	0	1	1	APMB	FALSE
chr10	127089574	+	0	1	0	0	0	1	1	AMB	FALSE
chr10	127455398	+	0	0	0	1	1	0	1	RSB	FALSE
chr10	127455430	+	0	0	0	0	0	0	1	B	FALSE
chr10	127455531	+	0	0	0	0	0	0	1	B	FALSE
chr10	127466220	+	1	1	1	0	0	1	1	UAPMB	FALSE
chr10	127473516	+	0	1	1	0	0	1	1	APMB	FALSE
chr10	127522496	+	0	1	0	0	0	0	1	AB	FALSE
chr10	127523075	+	1	1	1	0	0	0	1	UAPB	FALSE
chr10	127555589	+	0	1	1	0	0	1	1	APMB	FALSE
chr10	127556649	+	0	1	1	1	0	1	1	APRMB	FALSE
chr10	127561127	+	0	0	1	0	0	0	1	PB	FALSE
chr10	127636468	+	0	1	0	0	0	0	1	AB	FALSE
chr10	127642118	+	1	0	1	1	1	0	1	UPRSB	TRUE
chr10	127644534	+	0	1	0	0	0	0	1	AB	FALSE
chr10	127679652	+	0	1	1	0	0	1	1	APMB	FALSE
chr10	127680541	+	0	0	0	0	0	1	1	MB	FALSE
chr10	127683120	+	0	0	1	0	0	0	1	PB	FALSE
chr10	127722685	+	1	1	1	0	0	1	1	UAPMB	FALSE
chr10	127751752	+	1	1	1	0	0	1	1	UAPMB	FALSE
chr10	127760355	+	1	1	1	0	0	0	1	UAPB	FALSE
chr10	127796179	+	1	1	1	0	0	1	1	UAPMB	FALSE
chr10	127797996	+	0	1	1	0	0	1	1	APMB	FALSE
chr10	127815400	+	0	0	0	0	0	1	1	MB	FALSE
chr10	127818174	+	0	0	0	1	0	0	1	RB	FALSE
chr10	127824403	+	0	1	1	0	0	0	1	APB	FALSE
chr10	127826797	+	0	1	1	0	0	1	1	APMB	FALSE
chr10	127911722	+	0	1	1	0	0	1	1	APMB	FALSE
chr10	127917888	+	0	0	1	0	0	1	1	PMB	FALSE
chr10	127921108	+	1	1	1	0	0	1	1	UAPMB	FALSE
chr10	127925928	+	0	0	1	0	0	0	1	PB	FALSE
chr10	128151287	+	0	0	1	0	0	0	1	PB	FALSE
chr10	128285789	+	0	1	1	0	0	1	1	APMB	FALSE
chr11	3032350	-	0	0	1	0	0	1	1	PMB	FALSE
chr11	3032909	-	1	1	0	0	0	0	1	UAB	FALSE
chr11	3032968	-	0	0	0	0	0	0	1	B	FALSE
chr11	3035488	-	0	0	0	1	0	0	1	RB	FALSE
chr11	3036800	-	1	1	0	0	0	0	1	UAB	FALSE
chr11	3042433	-	1	1	1	0	0	1	1	UAPMB	FALSE
chr11	3045019	-	1	1	1	0	0	1	1	UAPMB	FALSE
chr11	3046102	-	0	0	0	0	0	0	1	B	FALSE
chr11	3056867	-	0	0	0	0	0	0	1	B	FALSE
chr11	3060167	-	1	1	1	1	1	1	1	UAPRSMB	TRUE
chr11	3077551	-	1	1	1	0	0	1	1	UAPMB	FALSE
chr11	3077556	-	1	1	1	0	0	1	1	UAPMB	FALSE
chr11	3086166	-	1	0	1	0	0	0	1	UPB	FALSE
chr11	3086177	-	0	1	1	0	0	1	1	APMB	FALSE
chr11	3089083	-	1	1	1	0	0	1	1	UAPMB	FALSE
chr11	3250795	-	1	1	1	0	0	0	1	UAPB	FALSE
chr11	3252203	-	0	1	0	0	0	0	1	AB	FALSE
chr11	3421995	-	1	1	1	0	0	1	1	UAPMB	FALSE
chr11	3422601	-	1	1	1	1	1	1	1	UAPRSMB	TRUE
chr11	3422663	-	1	1	0	0	0	0	1	UAB	FALSE
chr11	3544720	-	0	0	0	0	0	0	1	B	FALSE
chr11	4003582	-	1	1	1	0	0	0	1	UAPB	FALSE
chr11	4009277	-	0	1	1	0	0	1	1	APMB	FALSE
chr11	4044132	-	1	0	1	1	0	1	1	UPRMB	FALSE
chr11	4385475	-	1	1	1	0	0	1	1	UAPMB	FALSE
chr11	4604103	-	0	0	0	0	0	0	1	B	FALSE
chr11	4680667	-	0	1	1	1	1	1	1	APRSMB	FALSE
chr11	4718530	-	0	1	0	0	0	1	1	AMB	FALSE
chr11	4970753	-	1	1	1	0	0	1	1	UAPMB	FALSE
chr11	4971663	-	1	0	1	0	0	0	1	UPB	FALSE
chr11	4971666	-	1	1	1	0	0	1	1	UAPMB	FALSE
chr11	4972974	-	0	1	1	0	0	1	1	APMB	FALSE
chr11	4982133	-	0	0	0	1	0	0	1	RB	FALSE
chr11	4982457	-	0	1	1	0	0	1	1	APMB	FALSE
chr11	4993760	-	1	1	1	1	1	1	1	UAPRSMB	TRUE
chr11	4993932	-	0	0	1	0	0	0	1	PB	FALSE
chr11	5183477	-	0	1	1	0	0	1	1	APMB	FALSE
chr11	5186282	-	1	1	1	0	0	1	1	UAPMB	FALSE
chr11	5434417	-	1	1	1	1	0	1	1	UAPRMB	FALSE
chr11	5441453	-	1	1	1	1	1	1	1	UAPRSMB	TRUE
chr11	5729753	-	0	0	1	0	0	0	1	PB	FALSE
chr11	5774443	-	0	1	1	0	0	1	1	APMB	FALSE
chr11	5778078	-	0	0	0	0	0	0	1	B	FALSE
chr11	6161753	-	1	1	1	0	0	0	1	UAPB	FALSE
chr11	6161760	-	1	0	1	0	0	0	1	UPB	FALSE
chr11	6162764	-	0	1	1	1	1	1	1	APRSMB	FALSE
chr11	6166562	-	1	1	0	0	0	0	1	UAB	FALSE
chr11	6166709	-	1	0	1	0	0	1	1	UPMB	FALSE
chr11	6173991	-	0	0	0	0	0	1	1	MB	FALSE
chr11	6406938	-	0	0	0	0	0	0	1	B	FALSE
chr11	6408001	-	0	1	1	1	1	1	1	APRSMB	FALSE
chr11	6408005	-	0	1	1	0	0	1	1	APMB	FALSE
chr11	6412568	-	1	1	1	1	0	1	1	UAPRMB	FALSE
chr11	6414557	-	1	0	1	0	0	1	1	UPMB	FALSE
chr11	6416895	-	1	0	1	0	0	1	1	UPMB	FALSE
chr11	6426461	-	1	1	1	0	0	1	1	UAPMB	FALSE
chr11	6428194	-	0	0	0	0	0	0	1	B	FALSE
chr11	6516416	-	1	0	0	1	0	1	1	URMB	FALSE
chr11	6518884	-	0	0	0	0	0	0	1	B	FALSE
chr11	6519135	-	1	1	1	0	0	1	1	UAPMB	FALSE
chr11	6519740	-	1	1	1	0	0	0	1	UAPB	FALSE
chr11	6520242	-	0	0	0	0	0	0	1	B	FALSE
chr11	6520245	-	0	1	0	0	0	1	1	AMB	FALSE
chr11	6521103	-	0	1	1	0	0	1	1	APMB	FALSE
chr11	6523719	-	0	0	0	0	0	1	1	MB	FALSE
chr11	6524303	-	1	1	1	0	0	1	1	UAPMB	FALSE
chr11	6525003	-	0	0	0	0	0	0	1	B	FALSE
chr11	8348846	-	0	1	1	0	0	1	1	APMB	FALSE
chr11	8351532	-	0	1	1	0	0	1	1	APMB	FALSE
chr11	8379698	-	0	0	1	0	0	0	1	PB	FALSE
chr11	8910423	-	1	0	0	1	0	1	1	URMB	FALSE
chr11	16881964	-	1	1	1	0	0	0	1	UAPB	FALSE
chr11	16895385	-	1	1	1	0	0	1	1	UAPMB	FALSE
chr11	19964880	-	1	1	1	0	0	1	1	UAPMB	FALSE
chr11	19977357	-	1	1	1	0	0	0	1	UAPB	FALSE
chr11	20208104	-	1	0	1	0	0	0	1	UPB	FALSE
chr11	20726543	-	1	1	1	0	0	1	1	UAPMB	FALSE
chr11	21458578	-	1	0	1	0	0	1	1	UPMB	FALSE
chr11	21465955	-	1	1	1	0	0	1	1	UAPMB	FALSE
chr11	21913404	-	0	0	0	0	0	0	1	B	FALSE
chr11	23392075	-	0	1	0	0	0	1	1	AMB	FALSE
chr11	23392078	-	1	0	0	0	0	0	1	UB	FALSE
chr11	23528812	-	0	0	0	0	0	0	1	B	FALSE
chr11	23768149	-	1	1	1	0	0	1	1	UAPMB	FALSE
chr11	29446050	-	0	1	1	0	0	0	1	APB	FALSE
chr11	29446051	-	0	0	1	0	0	0	1	PB	FALSE
chr11	29446187	-	0	0	0	0	0	0	1	B	FALSE
chr11	29446807	-	0	1	1	0	0	1	1	APMB	FALSE
chr11	29447721	-	1	1	0	0	0	0	1	UAB	FALSE
chr11	30042460	-	1	1	1	1	0	0	1	UAPRB	FALSE
chr11	31569396	-	1	1	1	0	0	1	1	UAPMB	FALSE
chr11	32093900	-	0	1	1	0	0	1	1	APMB	FALSE
chr11	32094774	-	0	1	1	0	0	1	1	APMB	FALSE
chr11	32112038	-	1	1	1	0	0	1	1	UAPMB	FALSE
chr11	32112962	-	1	1	1	1	0	0	1	UAPRB	FALSE
chr11	32113533	-	0	1	1	0	0	0	1	APB	FALSE
chr11	33052873	-	1	0	1	0	0	0	1	UPB	FALSE
chr11	33052884	-	1	1	1	0	0	1	1	UAPMB	FALSE
chr11	33053861	-	0	0	0	0	0	0	1	B	FALSE
chr11	33054084	-	1	1	1	1	0	1	1	UAPRMB	FALSE
chr11	33056766	-	1	1	1	1	1	1	1	UAPRSMB	TRUE
chr11	33057078	-	1	1	1	0	0	1	1	UAPMB	FALSE
chr11	33060461	-	0	1	1	1	0	1	1	APRMB	FALSE
chr11	33060463	-	0	0	1	0	0	1	1	PMB	FALSE
chr11	33060945	-	1	0	1	1	0	1	1	UPRMB	FALSE
chr11	33060949	-	0	1	1	1	1	1	1	APRSMB	FALSE
chr11	33060951	-	1	0	1	0	0	0	1	UPB	FALSE
chr11	33061255	-	0	1	1	0	0	1	1	APMB	FALSE
chr11	33061649	-	1	0	1	0	0	0	1	UPB	FALSE
chr11	33061658	-	1	0	1	0	0	0	1	UPB	FALSE
chr11	33062711	-	0	1	0	0	0	0	1	AB	FALSE
chr11	33303977	-	0	0	0	0	0	0	1	B	FALSE
chr11	33382889	-	0	0	0	0	0	0	1	B	FALSE
chr11	34127754	-	1	1	1	0	0	0	1	UAPB	FALSE
chr11	34148688	-	0	0	1	1	1	0	1	PRSB	FALSE
chr11	34154494	-	0	0	1	0	0	0	1	PB	FALSE
chr11	34161582	-	1	0	1	0	0	1	1	UPMB	FALSE
chr11	34403437	-	0	1	1	0	0	1	1	APMB	FALSE
chr11	34505648	-	0	0	0	1	1	0	1	RSB	FALSE
chr11	34509024	-	1	0	1	0	0	1	1	UPMB	FALSE
chr11	34509171	-	1	1	0	0	0	0	1	UAB	FALSE
chr11	34540988	-	0	1	1	0	0	1	1	APMB	FALSE
chr11	35622871	-	0	1	1	0	0	1	1	APMB	FALSE
chr11	35629263	-	1	0	1	0	0	0	1	UPB	FALSE
chr11	35631059	-	0	1	1	0	0	1	1	APMB	FALSE
chr11	35634742	-	0	1	1	0	0	1	1	APMB	FALSE
chr11	35634747	-	1	1	1	0	0	1	1	UAPMB	FALSE
chr11	40519594	-	1	1	1	0	0	0	1	UAPB	FALSE
chr11	40521696	-	0	1	1	0	0	0	1	APB	FALSE
chr11	40523794	-	1	0	1	0	0	1	1	UPMB	FALSE
chr11	40523795	-	1	1	1	0	0	0	1	UAPB	FALSE
chr11	40523799	-	0	1	1	0	0	1	1	APMB	FALSE
chr11	40542029	-	0	1	1	0	0	1	1	APMB	FALSE
chr11	40564591	-	0	1	1	0	0	1	1	APMB	FALSE
chr11	45763830	-	0	1	1	0	0	0	1	APB	FALSE
chr11	46066203	-	1	1	1	1	1	1	1	UAPRSMB	TRUE
chr11	46067339	-	0	1	0	0	0	1	1	AMB	FALSE
chr11	46086227	-	0	1	1	1	0	1	1	APRMB	FALSE
chr11	46091680	-	1	1	1	0	0	1	1	UAPMB	FALSE
chr11	48621373	-	1	1	1	0	0	1	1	UAPMB	FALSE
chr11	48621782	-	1	0	1	0	0	0	1	UPB	FALSE
chr11	48622040	-	1	1	1	1	1	0	1	UAPRSB	TRUE
chr11	48626091	-	0	0	0	0	0	0	1	B	FALSE
chr11	49495716	-	1	0	1	0	0	0	1	UPB	FALSE
chr11	49500460	-	1	1	1	0	0	1	1	UAPMB	FALSE
chr11	50014422	-	0	0	0	0	0	0	1	B	FALSE
chr11	50014472	-	0	0	1	0	0	0	1	PB	FALSE
chr11	50016114	-	1	1	1	1	1	1	1	UAPRSMB	TRUE
chr11	50016556	-	1	1	1	0	0	1	1	UAPMB	FALSE
chr11	50110661	-	1	1	1	0	0	1	1	UAPMB	FALSE
chr11	50110913	-	1	0	1	0	0	1	1	UPMB	FALSE
chr11	50110923	-	1	1	1	0	0	1	1	UAPMB	FALSE
chr11	50112912	-	1	1	0	0	0	1	1	UAMB	FALSE
chr11	50114360	-	0	0	0	0	0	0	1	B	FALSE
chr11	50115193	-	0	0	0	0	0	0	1	B	FALSE
chr11	50121921	-	0	1	1	1	0	1	1	APRMB	FALSE
chr11	50124176	-	0	1	0	0	0	0	1	AB	FALSE
chr11	50124178	-	0	0	0	0	0	0	1	B	FALSE
chr11	50125305	-	0	1	1	0	0	0	1	APB	FALSE
chr11	51415954	-	1	0	0	0	0	0	1	UB	FALSE
chr11	51418337	-	0	1	1	0	0	1	1	APMB	FALSE
chr11	51418835	-	1	0	0	0	0	0	1	UB	FALSE
chr11	51437855	-	1	0	0	1	0	0	1	URB	FALSE
chr11	51442889	-	0	0	0	0	0	0	1	B	FALSE
chr11	51543103	-	0	1	1	0	0	0	1	APB	FALSE
chr11	51545407	-	0	0	0	0	0	0	1	B	FALSE
chr11	51640201	-	1	1	1	0	0	1	1	UAPMB	FALSE
chr11	51643737	-	1	0	0	0	0	0	1	UB	FALSE
chr11	53080637	-	0	0	1	1	0	1	1	PRMB	FALSE
chr11	53082112	-	0	1	1	1	1	1	1	APRSMB	FALSE
chr11	53083397	-	1	1	1	0	0	1	1	UAPMB	FALSE
chr11	53086167	-	1	0	0	0	0	0	1	UB	FALSE
chr11	53097189	-	1	1	1	0	0	1	1	UAPMB	FALSE
chr11	53244137	-	1	0	0	0	0	0	1	UB	FALSE
chr11	53468317	-	0	0	0	0	0	0	1	B	FALSE
chr11	53493406	-	0	1	0	0	0	0	1	AB	FALSE
chr11	53508587	-	1	0	1	0	0	1	1	UPMB	FALSE
chr11	53511847	-	1	0	1	0	0	1	1	UPMB	FALSE
chr11	53799848	-	1	0	0	0	0	0	1	UB	FALSE
chr11	53802484	-	0	1	1	0	0	0	1	APB	FALSE
chr11	53802486	-	0	0	1	0	0	0	1	PB	FALSE
chr11	54533883	-	1	1	1	1	0	1	1	UAPRMB	FALSE
chr11	54533891	-	1	0	1	0	0	0	1	UPB	FALSE
chr11	54731445	-	0	1	1	0	0	1	1	APMB	FALSE
chr11	54737599	-	0	0	0	0	0	0	1	B	FALSE
chr11	54740314	-	0	1	1	0	0	1	1	APMB	FALSE
chr11	54747699	-	0	1	1	1	0	1	1	APRMB	FALSE
chr11	54747708	-	0	0	1	0	0	1	1	PMB	FALSE
chr11	54751588	-	1	1	1	0	0	1	1	UAPMB	FALSE
chr11	54804793	-	0	1	0	0	0	0	1	AB	FALSE
chr11	54822733	-	1	1	1	0	0	1	1	UAPMB	FALSE
chr11	57305586	-	0	1	1	0	0	1	1	APMB	FALSE
chr11	57942426	-	0	0	1	0	0	0	1	PB	FALSE
chr11	57944055	-	0	0	0	0	0	0	1	B	FALSE
chr11	57977932	-	1	1	1	0	0	1	1	UAPMB	FALSE
chr11	59026463	-	1	1	1	1	0	1	1	UAPRMB	FALSE
chr11	59027051	-	1	1	1	1	0	0	1	UAPRB	FALSE
chr11	59316625	-	1	1	1	1	1	1	1	UAPRSMB	TRUE
chr11	59316824	-	0	1	0	0	0	1	1	AMB	FALSE
chr11	59317340	-	0	0	1	0	0	0	1	PB	FALSE
chr11	59319501	-	0	0	1	1	0	0	1	PRB	FALSE
chr11	59608785	-	1	1	1	0	0	1	1	UAPMB	FALSE
chr11	59611775	-	1	1	1	0	0	1	1	UAPMB	FALSE
chr11	59643827	-	1	0	0	0	0	1	1	UMB	FALSE
chr11	59777892	-	1	1	1	0	0	1	1	UAPMB	FALSE
chr11	60013678	-	0	0	1	0	0	0	1	PB	FALSE
chr11	60013683	-	1	1	1	1	1	1	1	UAPRSMB	TRUE
chr11	60013810	-	0	0	0	0	0	0	1	B	FALSE
chr11	60014054	-	0	1	1	1	0	1	1	APRMB	FALSE
chr11	60014373	-	0	1	1	0	0	1	1	APMB	FALSE
chr11	60015426	-	1	1	1	0	0	0	1	UAPB	FALSE
chr11	60016450	-	1	0	1	1	1	1	1	UPRSMB	TRUE
chr11	60017109	-	0	0	0	0	0	0	1	B	FALSE
chr11	60017110	-	0	1	0	0	0	0	1	AB	FALSE
chr11	60020089	-	1	1	1	0	0	1	1	UAPMB	FALSE
chr11	60020097	-	0	1	1	1	0	1	1	APRMB	FALSE
chr11	60020100	-	0	1	1	0	0	1	1	APMB	FALSE
chr11	60220920	-	0	1	1	0	0	1	1	APMB	FALSE
chr11	60529479	-	1	0	1	1	1	1	1	UPRSMB	TRUE
chr11	60534690	-	1	1	1	1	1	1	1	UAPRSMB	TRUE
chr11	60535924	-	0	1	1	0	0	1	1	APMB	FALSE
chr11	60561728	-	0	1	0	0	0	0	1	AB	FALSE
chr11	60563120	-	0	1	1	0	0	1	1	APMB	FALSE
chr11	60603784	-	1	1	1	1	1	1	1	UAPRSMB	TRUE
chr11	60603791	-	0	0	1	0	0	1	1	PMB	FALSE
chr11	60603792	-	0	1	1	0	0	0	1	APB	FALSE
chr11	60615556	-	0	1	1	0	0	1	1	APMB	FALSE
chr11	60976522	-	1	1	1	0	0	1	1	UAPMB	FALSE
chr11	61061568	-	1	1	0	0	0	1	1	UAMB	FALSE
chr11	61307098	-	0	0	0	0	0	0	1	B	FALSE
chr11	61548394	-	1	0	0	0	0	1	1	UMB	FALSE
chr11	61600867	-	0	0	0	0	0	0	1	B	FALSE
chr11	62152601	-	1	1	1	0	0	0	1	UAPB	FALSE
chr11	62156877	-	1	0	1	1	1	0	1	UPRSB	TRUE
chr11	62158845	-	1	1	1	0	0	1	1	UAPMB	FALSE
chr11	62165081	-	1	1	1	0	0	1	1	UAPMB	FALSE
chr11	62172549	-	0	1	1	0	0	1	1	APMB	FALSE
chr11	62196906	-	0	1	1	0	0	1	1	APMB	FALSE
chr11	68786320	-	0	0	0	0	0	1	1	MB	FALSE
chr11	68786793	-	1	1	1	0	0	0	1	UAPB	FALSE
chr11	68804337	-	0	1	1	0	0	1	1	APMB	FALSE
chr11	68806310	-	1	1	1	0	0	1	1	UAPMB	FALSE
chr11	68814115	-	0	0	1	0	0	0	1	PB	FALSE
chr11	68814126	-	1	1	1	0	0	0	1	UAPB	FALSE
chr11	68814131	-	1	1	1	0	0	1	1	UAPMB	FALSE
chr11	68814894	-	0	1	0	0	0	0	1	AB	FALSE
chr11	69113516	-	0	0	1	0	0	1	1	PMB	FALSE
chr11	69113519	-	0	0	1	0	0	0	1	PB	FALSE
chr11	69113522	-	0	0	1	0	0	0	1	PB	FALSE
chr11	69132573	-	1	1	1	0	0	1	1	UAPMB	FALSE
chr11	69168005	-	1	1	1	0	0	1	1	UAPMB	FALSE
chr11	69169003	-	1	1	1	0	0	0	1	UAPB	FALSE
chr11	69173575	-	1	1	1	1	1	1	1	UAPRSMB	TRUE
chr11	69175325	-	0	0	1	0	0	0	1	PB	FALSE
chr11	69175326	-	0	0	1	0	0	0	1	PB	FALSE
chr11	69214682	-	0	0	0	0	0	0	1	B	FALSE
chr11	69215807	-	1	1	1	0	0	1	1	UAPMB	FALSE
chr11	69221361	-	1	1	1	1	1	1	1	UAPRSMB	TRUE
chr11	69221923	-	1	1	1	0	0	1	1	UAPMB	FALSE
chr11	69391239	-	0	0	0	0	0	0	1	B	FALSE
chr11	69471545	-	0	0	1	0	0	0	1	PB	FALSE
chr11	69472221	-	1	1	1	1	1	1	1	UAPRSMB	TRUE
chr11	69481300	-	0	1	1	1	1	1	1	APRSMB	FALSE
chr11	69481301	-	0	0	1	0	0	1	1	PMB	FALSE
chr11	69481302	-	0	0	1	0	0	0	1	PB	FALSE
chr11	69481308	-	0	1	1	1	1	1	1	APRSMB	FALSE
chr11	69483774	-	0	0	0	0	0	0	1	B	FALSE
chr11	69483792	-	1	1	1	1	1	1	1	UAPRSMB	TRUE
chr11	69484077	-	0	0	0	0	0	0	1	B	FALSE
chr11	69484274	-	1	1	1	1	1	1	1	UAPRSMB	TRUE
chr11	69484501	-	0	1	1	0	0	1	1	APMB	FALSE
chr11	69487816	-	0	0	1	0	0	1	1	PMB	FALSE
chr11	69491817	-	1	0	1	0	0	0	1	UPB	FALSE
chr11	69550885	-	1	1	1	1	1	1	1	UAPRSMB	TRUE
chr11	69553051	-	1	1	1	0	0	1	1	UAPMB	FALSE
chr11	69556434	-	0	0	1	0	0	0	1	PB	FALSE
chr11	69557788	-	1	0	1	0	0	1	1	UPMB	FALSE
chr11	69558571	-	1	1	1	0	0	1	1	UAPMB	FALSE
chr11	69559226	-	1	1	1	0	0	0	1	UAPB	FALSE
chr11	69560459	-	0	0	0	0	0	0	1	B	FALSE
chr11	69640865	-	0	0	1	0	0	1	1	PMB	FALSE
chr11	69704195	-	0	1	1	0	0	1	1	APMB	FALSE
chr11	69731260	-	1	0	1	1	1	1	1	UPRSMB	TRUE
chr11	69734429	-	0	0	0	0	0	0	1	B	FALSE
chr11	69784006	-	0	1	0	0	0	0	1	AB	FALSE
chr11	69793582	-	0	1	1	0	0	1	1	APMB	FALSE
chr11	70206554	-	1	1	1	0	0	0	1	UAPB	FALSE
chr11	70209033	-	0	1	1	1	0	0	1	APRB	FALSE
chr11	70215247	-	0	1	1	0	0	0	1	APB	FALSE
chr11	70215268	-	0	0	1	0	0	1	1	PMB	FALSE
chr11	70432469	-	0	0	0	0	0	0	1	B	FALSE
chr11	70458447	-	0	1	1	1	0	1	1	APRMB	FALSE
chr11	70465745	-	0	1	1	0	0	1	1	APMB	FALSE
chr11	70466503	-	1	1	1	0	0	1	1	UAPMB	FALSE
chr11	70478604	-	0	1	1	0	0	1	1	APMB	FALSE
chr11	70488930	-	0	1	0	1	0	0	1	ARB	FALSE
chr11	70757761	-	1	1	1	1	0	1	1	UAPRMB	FALSE
chr11	70758504	-	0	0	1	0	0	0	1	PB	FALSE
chr11	70792305	-	1	0	1	0	0	1	1	UPMB	FALSE
chr11	70808785	-	1	0	1	0	0	0	1	UPB	FALSE
chr11	70823661	-	0	1	0	0	0	1	1	AMB	FALSE
chr11	70831901	-	0	1	1	0	0	1	1	APMB	FALSE
chr11	71980361	-	0	1	1	0	0	1	1	APMB	FALSE
chr11	72168364	-	0	0	1	0	0	0	1	PB	FALSE
chr11	74298222	-	0	0	0	0	0	0	1	B	FALSE
chr11	74499239	-	0	0	0	0	0	1	1	MB	FALSE
chr11	74666704	-	0	0	1	0	0	0	1	PB	FALSE
chr11	74680692	-	0	1	1	0	0	1	1	APMB	FALSE
chr11	74994188	-	1	0	1	1	1	0	1	UPRSB	TRUE
chr11	75116273	-	0	1	1	0	0	1	1	APMB	FALSE
chr11	75119740	-	1	1	1	0	0	1	1	UAPMB	FALSE
chr11	75161616	-	1	1	0	0	0	0	1	UAB	FALSE
chr11	75229034	-	1	1	0	0	0	0	1	UAB	FALSE
chr11	75931341	-	0	0	1	1	0	0	1	PRB	FALSE
chr11	76609138	-	0	0	0	0	0	0	1	B	FALSE
chr11	76659595	-	0	1	0	1	0	0	1	ARB	FALSE
chr11	77287819	-	1	0	0	0	0	0	1	UB	FALSE
chr11	77889569	-	0	1	1	0	0	1	1	APMB	FALSE
chr11	77889571	-	0	0	1	1	0	0	1	PRB	FALSE
chr11	77889573	-	1	1	1	0	0	1	1	UAPMB	FALSE
chr11	77981413	-	1	1	1	1	1	1	1	UAPRSMB	TRUE
chr11	77984476	-	0	0	1	0	0	0	1	PB	FALSE
chr11	77985494	-	1	0	0	0	0	1	1	UMB	FALSE
chr11	77985764	-	0	1	1	0	0	1	1	APMB	FALSE
chr11	77996513	-	0	1	1	0	0	1	1	APMB	FALSE
chr11	78025449	-	1	0	1	0	0	1	1	UPMB	FALSE
chr11	78025719	-	0	1	1	1	1	1	1	APRSMB	FALSE
chr11	78026612	-	0	0	0	0	0	1	1	MB	FALSE
chr11	78032834	-	0	1	1	0	0	1	1	APMB	FALSE
chr11	78039340	-	0	0	1	0	0	0	1	PB	FALSE
chr11	78040567	-	0	1	1	0	0	1	1	APMB	FALSE
chr11	78046899	-	0	1	0	0	0	0	1	AB	FALSE
chr11	78323082	-	0	0	0	0	0	0	1	B	FALSE
chr11	78323713	-	0	1	0	0	0	0	1	AB	FALSE
chr11	78340909	-	0	0	0	0	0	0	1	B	FALSE
chr11	78786713	-	1	0	1	1	1	1	1	UPRSMB	TRUE
chr11	78841321	-	0	0	1	0	0	0	1	PB	FALSE
chr11	78858789	-	1	1	1	0	0	0	1	UAPB	FALSE
chr11	79055680	-	0	1	1	0	0	1	1	APMB	FALSE
chr11	79342146	-	0	0	1	0	0	0	1	PB	FALSE
chr11	79749365	-	0	0	0	1	1	0	1	RSB	FALSE
chr11	79759570	-	0	0	0	0	0	0	1	B	FALSE
chr11	79770714	-	0	0	0	0	0	1	1	MB	FALSE
chr11	79774357	-	1	1	1	0	0	1	1	UAPMB	FALSE
chr11	79871537	-	1	1	1	0	0	1	1	UAPMB	FALSE
chr11	80177539	-	1	1	1	0	0	1	1	UAPMB	FALSE
chr11	80187199	-	0	0	0	0	0	0	1	B	FALSE
chr11	82714584	-	0	0	1	0	0	0	1	PB	FALSE
chr11	82719122	-	0	1	1	0	0	1	1	APMB	FALSE
chr11	83111568	-	1	0	1	0	0	1	1	UPMB	FALSE
chr11	84323327	-	0	1	1	0	0	1	1	APMB	FALSE
chr11	84323329	-	0	0	1	0	0	0	1	PB	FALSE
chr11	84323333	-	1	1	1	0	0	1	1	UAPMB	FALSE
chr11	84635280	-	1	1	1	1	1	1	1	UAPRSMB	TRUE
chr11	84650059	-	0	0	1	0	0	0	1	PB	FALSE
chr11	84667691	-	1	1	1	0	0	1	1	UAPMB	FALSE
chr11	84802284	-	1	1	1	0	0	1	1	UAPMB	FALSE
chr11	84805812	-	0	1	0	0	0	0	1	AB	FALSE
chr11	84864808	-	1	1	1	0	0	1	1	UAPMB	FALSE
chr11	84867551	-	0	0	0	1	0	0	1	RB	FALSE
chr11	85011653	-	0	0	0	0	0	0	1	B	FALSE
chr11	85028474	-	1	1	0	0	0	1	1	UAMB	FALSE
chr11	86058165	-	0	1	1	0	0	1	1	APMB	FALSE
chr11	86092459	-	1	1	1	0	0	1	1	UAPMB	FALSE
chr11	86098861	-	1	0	1	1	1	0	1	UPRSB	TRUE
chr11	86102678	-	1	1	1	0	0	1	1	UAPMB	FALSE
chr11	86115082	-	0	1	1	0	0	1	1	APMB	FALSE
chr11	86120586	-	1	0	1	1	0	0	1	UPRB	FALSE
chr11	86142135	-	1	0	1	1	0	1	1	UPRMB	FALSE
chr11	86317908	-	1	1	1	0	0	1	1	UAPMB	FALSE
chr11	86325193	-	0	1	1	0	0	1	1	APMB	FALSE
chr11	86330943	-	0	0	1	0	0	0	1	PB	FALSE
chr11	86330944	-	0	1	1	0	0	0	1	APB	FALSE
chr11	86509220	-	1	1	1	0	0	0	1	UAPB	FALSE
chr11	86519653	-	1	1	1	0	0	1	1	UAPMB	FALSE
chr11	86520765	-	1	0	1	0	0	0	1	UPB	FALSE
chr11	86531589	-	1	1	1	0	0	1	1	UAPMB	FALSE
chr11	86533913	-	0	1	1	0	0	0	1	APB	FALSE
chr11	86538804	-	0	0	1	0	0	0	1	PB	FALSE
chr11	86547369	-	1	1	1	0	0	1	1	UAPMB	FALSE
chr11	87793545	-	0	0	0	0	0	0	1	B	FALSE
chr11	87793569	-	0	0	0	1	1	0	1	RSB	FALSE
chr11	88700117	-	0	1	0	0	0	0	1	AB	FALSE
chr11	88701093	-	1	0	1	0	0	0	1	UPB	FALSE
chr11	88802461	-	0	0	0	0	0	0	1	B	FALSE
chr11	88802693	-	0	1	1	0	0	0	1	APB	FALSE
chr11	93816963	-	0	1	1	1	1	1	1	APRSMB	FALSE
chr11	93820852	-	1	1	1	0	0	1	1	UAPMB	FALSE
chr11	94153804	-	1	1	0	0	0	1	1	UAMB	FALSE
chr11	94154617	-	0	1	1	1	1	1	1	APRSMB	FALSE
chr11	94527867	-	1	0	1	0	0	0	1	UPB	FALSE
chr11	94530142	-	1	1	1	0	0	1	1	UAPMB	FALSE
chr11	94913905	-	1	1	1	0	0	1	1	UAPMB	FALSE
chr11	94923418	-	0	1	1	1	1	1	1	APRSMB	FALSE
chr11	94924573	-	1	1	1	0	0	1	1	UAPMB	FALSE
chr11	95137881	-	0	1	1	0	0	1	1	APMB	FALSE
chr11	95138929	-	0	0	0	0	0	0	1	B	FALSE
chr11	95829820	-	0	0	1	0	0	0	1	PB	FALSE
chr11	95912914	-	0	0	0	0	0	0	1	B	FALSE
chr11	95934532	-	0	0	0	0	0	0	1	B	FALSE
chr11	95935034	-	1	0	1	1	1	0	1	UPRSB	TRUE
chr11	95935378	-	0	1	1	1	0	1	1	APRMB	FALSE
chr11	95964086	-	1	0	1	0	0	0	1	UPB	FALSE
chr11	96632218	-	0	1	1	0	0	1	1	APMB	FALSE
chr11	96635844	-	1	1	1	0	0	1	1	UAPMB	FALSE
chr11	96689563	-	1	0	1	0	0	1	1	UPMB	FALSE
chr11	96769736	-	0	0	1	0	0	0	1	PB	FALSE
chr11	96769737	-	0	0	1	1	1	0	1	PRSB	FALSE
chr11	96772070	-	1	1	1	0	0	0	1	UAPB	FALSE
chr11	96800661	-	1	0	1	1	1	0	1	UPRSB	TRUE
chr11	96800809	-	0	0	0	1	1	1	1	RSMB	FALSE
chr11	96800810	-	0	0	0	1	1	0	1	RSB	FALSE
chr11	96800811	-	0	0	0	0	0	0	1	B	FALSE
chr11	96803867	-	1	1	1	0	0	0	1	UAPB	FALSE
chr11	96804918	-	0	0	0	0	0	0	1	B	FALSE
chr11	97025363	-	0	1	1	1	1	1	1	APRSMB	FALSE
chr11	97026437	-	1	1	1	0	0	1	1	UAPMB	FALSE
chr11	97026819	-	1	1	1	0	0	1	1	UAPMB	FALSE
chr11	97027473	-	1	1	1	0	0	1	1	UAPMB	FALSE
chr11	97028739	-	0	0	0	0	0	1	1	MB	FALSE
chr11	97028754	-	0	0	0	0	0	0	1	B	FALSE
chr11	97030272	-	1	0	1	1	1	1	1	UPRSMB	TRUE
chr11	97030276	-	0	1	1	0	0	0	1	APB	FALSE
chr11	97030629	-	1	1	1	0	0	1	1	UAPMB	FALSE
chr11	97038693	-	1	1	1	0	0	0	1	UAPB	FALSE
chr11	97039695	-	1	1	1	0	0	0	1	UAPB	FALSE
chr11	97041930	-	1	1	1	0	0	1	1	UAPMB	FALSE
chr11	97104158	-	0	0	1	0	0	0	1	PB	FALSE
chr11	97560672	-	0	0	1	0	0	0	1	PB	FALSE
chr11	97560674	-	0	0	1	0	0	0	1	PB	FALSE
chr11	97581176	-	0	0	1	0	0	0	1	PB	FALSE
chr11	97639499	-	1	1	1	1	1	1	1	UAPRSMB	TRUE
chr11	97642811	-	0	1	1	1	1	1	1	APRSMB	FALSE
chr11	97643240	-	0	1	1	0	0	1	1	APMB	FALSE
chr11	97643528	-	0	0	0	0	0	1	1	MB	FALSE
chr11	97643529	-	0	0	0	0	0	0	1	B	FALSE
chr11	97643530	-	0	0	0	1	0	1	1	RMB	FALSE
chr11	97901852	-	1	1	1	0	0	0	1	UAPB	FALSE
chr11	98022373	-	0	0	1	1	0	0	1	PRB	FALSE
chr11	98568633	-	0	1	1	0	0	1	1	APMB	FALSE
chr11	98577092	-	0	1	1	1	1	1	1	APRSMB	FALSE
chr11	98855268	-	1	0	1	1	1	1	1	UPRSMB	TRUE
chr11	98855274	-	0	1	1	0	0	1	1	APMB	FALSE
chr11	98856714	-	1	1	1	1	1	0	1	UAPRSB	TRUE
chr11	98857061	-	1	1	1	1	1	1	1	UAPRSMB	TRUE
chr11	98857307	-	1	1	1	1	1	1	1	UAPRSMB	TRUE
chr11	98861589	-	0	1	0	0	0	0	1	AB	FALSE
chr11	98861966	-	0	0	0	0	0	0	1	B	FALSE
chr11	98862463	-	0	1	1	0	0	1	1	APMB	FALSE
chr11	98864416	-	0	0	1	0	0	0	1	PB	FALSE
chr11	99074671	-	1	1	1	0	0	1	1	UAPMB	FALSE
chr11	99086487	-	1	1	1	0	0	1	1	UAPMB	FALSE
chr11	100291286	-	0	1	1	0	0	1	1	APMB	FALSE
chr11	100302153	-	0	0	0	1	1	0	1	RSB	FALSE
chr11	100339430	-	0	1	1	0	0	1	1	APMB	FALSE
chr11	100343189	-	1	1	1	0	0	1	1	UAPMB	FALSE
chr11	100344872	-	1	0	0	0	0	0	1	UB	FALSE
chr11	100374339	-	1	1	1	0	0	1	1	UAPMB	FALSE
chr11	100375678	-	1	0	1	0	0	0	1	UPB	FALSE
chr11	100452899	-	1	1	1	1	1	1	1	UAPRSMB	TRUE
chr11	100569673	-	0	0	1	1	1	0	1	PRSB	FALSE
chr11	100569675	-	0	0	1	0	0	1	1	PMB	FALSE
chr11	100570317	-	1	1	1	1	1	1	1	UAPRSMB	TRUE
chr11	100572562	-	1	0	1	0	0	0	1	UPB	FALSE
chr11	100572818	-	0	0	1	1	0	0	1	PRB	FALSE
chr11	100629917	-	1	1	1	1	0	1	1	UAPRMB	FALSE
chr11	100953926	-	0	0	1	0	0	0	1	PB	FALSE
chr11	100965261	-	1	1	1	0	0	1	1	UAPMB	FALSE
chr11	101055883	-	0	0	1	0	0	0	1	PB	FALSE
chr11	101060510	-	0	0	0	0	0	0	1	B	FALSE
chr11	101070814	-	1	1	1	0	0	1	1	UAPMB	FALSE
chr11	101072036	-	0	1	0	0	0	0	1	AB	FALSE
chr11	101156968	-	0	1	1	0	0	1	1	APMB	FALSE
chr11	101272793	-	0	1	1	1	1	1	1	APRSMB	FALSE
chr11	101321957	-	0	1	1	0	0	0	1	APB	FALSE
chr11	101323376	-	0	1	0	0	0	1	1	AMB	FALSE
chr11	101353259	-	1	1	1	0	0	1	1	UAPMB	FALSE
chr11	101383839	-	1	1	1	0	0	1	1	UAPMB	FALSE
chr11	101383852	-	1	1	1	0	0	1	1	UAPMB	FALSE
chr11	101395371	-	0	1	1	0	0	0	1	APB	FALSE
chr11	101396955	-	1	1	1	0	0	1	1	UAPMB	FALSE
chr11	101885115	-	0	0	1	0	0	0	1	PB	FALSE
chr11	102058772	-	0	1	1	0	0	1	1	APMB	FALSE
chr11	102066305	-	0	1	1	0	0	1	1	APMB	FALSE
chr11	102153817	-	1	1	1	1	1	1	1	UAPRSMB	TRUE
chr11	102154215	-	0	0	0	0	0	0	1	B	FALSE
chr11	102154866	-	0	1	0	0	0	0	1	AB	FALSE
chr11	102168627	-	0	0	1	0	0	0	1	PB	FALSE
chr11	102172903	-	0	1	0	0	0	0	1	AB	FALSE
chr11	102215251	-	0	1	1	0	0	1	1	APMB	FALSE
chr11	102317010	-	0	1	1	0	0	1	1	APMB	FALSE
chr11	102318200	-	0	0	0	0	0	0	1	B	FALSE
chr11	102319204	-	1	1	1	0	0	0	1	UAPB	FALSE
chr11	102323153	-	0	1	1	0	0	1	1	APMB	FALSE
chr11	102326878	-	1	0	1	0	0	0	1	UPB	FALSE
chr11	102327857	-	0	1	1	0	0	1	1	APMB	FALSE
chr11	102328437	-	1	1	1	0	0	0	1	UAPB	FALSE
chr11	102550183	-	1	1	0	0	0	0	1	UAB	FALSE
chr11	102700235	-	1	0	1	1	1	1	1	UPRSMB	TRUE
chr11	102701454	-	1	1	1	0	0	1	1	UAPMB	FALSE
chr11	102701723	-	1	0	1	0	0	0	1	UPB	FALSE
chr11	102702864	-	0	0	1	0	0	0	1	PB	FALSE
chr11	102702865	-	0	1	1	1	0	1	1	APRMB	FALSE
chr11	102708973	-	0	0	0	0	0	1	1	MB	FALSE
chr11	102721458	-	1	1	1	0	0	1	1	UAPMB	FALSE
chr11	102729984	-	1	0	1	0	0	1	1	UPMB	FALSE
chr11	102730287	-	0	1	0	0	0	0	1	AB	FALSE
chr11	102767631	-	1	1	1	0	0	1	1	UAPMB	FALSE
chr11	102769980	-	0	1	1	0	0	1	1	APMB	FALSE
chr11	102774884	-	1	1	1	0	0	1	1	UAPMB	FALSE
chr11	102775102	-	0	0	1	1	0	0	1	PRB	FALSE
chr11	102776268	-	0	1	1	1	0	1	1	APRMB	FALSE
chr11	102776270	-	0	1	1	0	0	0	1	APB	FALSE
chr11	102777041	-	0	0	1	0	0	0	1	PB	FALSE
chr11	102856504	-	1	1	1	0	0	1	1	UAPMB	FALSE
chr11	102932726	-	1	0	1	1	1	0	1	UPRSB	TRUE
chr11	102940993	-	1	1	0	1	0	0	1	UARB	FALSE
chr11	103228329	-	0	1	1	1	0	0	1	APRB	FALSE
chr11	103256653	-	0	1	1	0	0	1	1	APMB	FALSE
chr11	104196543	-	0	1	1	0	0	1	1	APMB	FALSE
chr11	104197666	-	0	1	1	0	0	1	1	APMB	FALSE
chr11	104211987	-	0	1	1	0	0	1	1	APMB	FALSE
chr11	104374356	-	1	1	1	0	0	0	1	UAPB	FALSE
chr11	104390046	-	0	0	0	0	0	1	1	MB	FALSE
chr11	104390066	-	1	0	1	0	0	0	1	UPB	FALSE
chr11	106074694	-	1	0	1	0	0	0	1	UPB	FALSE
chr11	106111402	-	0	0	1	1	0	0	1	PRB	FALSE
chr11	106112671	-	1	0	1	0	0	1	1	UPMB	FALSE
chr11	106116762	-	1	1	1	0	0	1	1	UAPMB	FALSE
chr11	106116990	-	0	1	0	1	1	0	1	ARSB	FALSE
chr11	106125627	-	0	1	1	0	0	1	1	APMB	FALSE
chr11	106126375	-	0	1	1	1	0	1	1	APRMB	FALSE
chr11	106126376	-	0	0	1	1	0	0	1	PRB	FALSE
chr11	106126380	-	1	1	1	1	1	1	1	UAPRSMB	TRUE
chr11	106133696	-	0	0	0	0	0	0	1	B	FALSE
chr11	106264912	-	0	1	1	0	0	1	1	APMB	FALSE
chr11	106264913	-	0	1	1	0	0	1	1	APMB	FALSE
chr11	106298462	-	1	1	1	1	0	0	1	UAPRB	FALSE
chr11	106549938	-	0	0	0	0	0	1	1	MB	FALSE
chr11	106645103	-	0	0	0	0	0	1	1	MB	FALSE
chr11	106645123	-	1	1	0	0	0	0	1	UAB	FALSE
chr11	106645491	-	1	0	1	0	0	1	1	UPMB	FALSE
chr11	106645499	-	1	0	1	1	1	1	1	UPRSMB	TRUE
chr11	106645508	-	0	0	1	0	0	0	1	PB	FALSE
chr11	106646610	-	0	0	0	0	0	0	1	B	FALSE
chr11	106646631	-	1	0	1	1	0	1	1	UPRMB	FALSE
chr11	106647858	-	0	0	0	0	0	0	1	B	FALSE
chr11	106689690	-	1	0	0	0	0	0	1	UB	FALSE
chr11	106721138	-	0	1	1	0	0	1	1	APMB	FALSE
chr11	106850311	-	1	0	1	0	0	1	1	UPMB	FALSE
chr11	106852208	-	0	1	1	1	1	1	1	APRSMB	FALSE
chr11	106908210	-	0	0	0	1	0	0	1	RB	FALSE
chr11	106908685	-	1	1	1	0	0	1	1	UAPMB	FALSE
chr11	106916656	-	0	1	1	1	1	1	1	APRSMB	FALSE
chr11	106916660	-	0	1	1	0	0	0	1	APB	FALSE
chr11	106916666	-	1	1	1	1	1	1	1	UAPRSMB	TRUE
chr11	106924118	-	0	1	1	0	0	1	1	APMB	FALSE
chr11	106927047	-	1	1	1	0	0	1	1	UAPMB	FALSE
chr11	106929731	-	1	1	1	0	0	0	1	UAPB	FALSE
chr11	107041453	-	1	1	1	0	0	1	1	UAPMB	FALSE
chr11	107183024	-	0	0	1	0	0	0	1	PB	FALSE
chr11	109224314	-	0	0	0	0	0	0	1	B	FALSE
chr11	109317031	-	1	1	1	0	0	1	1	UAPMB	FALSE
chr11	115132419	-	1	1	0	0	0	1	1	UAMB	FALSE
chr11	115277192	-	1	0	0	0	0	0	1	UB	FALSE
chr11	115279856	-	0	0	1	0	0	0	1	PB	FALSE
chr11	115391757	-	1	0	1	0	0	1	1	UPMB	FALSE
chr11	115396019	-	1	0	1	0	0	0	1	UPB	FALSE
chr11	115449888	-	1	0	1	0	0	0	1	UPB	FALSE
chr11	115449895	-	0	0	1	0	0	0	1	PB	FALSE
chr11	115449897	-	0	0	1	0	0	0	1	PB	FALSE
chr11	115452035	-	0	1	0	0	0	0	1	AB	FALSE
chr11	115452712	-	0	1	1	1	1	1	1	APRSMB	FALSE
chr11	115452714	-	0	0	1	0	0	0	1	PB	FALSE
chr11	115470491	-	0	0	1	1	1	0	1	PRSB	FALSE
chr11	115470494	-	0	0	1	1	0	0	1	PRB	FALSE
chr11	115470496	-	1	0	1	1	1	1	1	UPRSMB	TRUE
chr11	115489209	-	0	0	0	0	0	0	1	B	FALSE
chr11	115668198	-	0	1	1	0	0	1	1	APMB	FALSE
chr11	115756463	-	1	0	1	0	0	0	1	UPB	FALSE
chr11	115871712	-	0	0	1	0	0	0	1	PB	FALSE
chr11	115931884	-	1	1	1	0	0	1	1	UAPMB	FALSE
chr11	115937694	-	0	0	1	0	0	0	1	PB	FALSE
chr11	115945292	-	0	1	1	1	1	1	1	APRSMB	FALSE
chr11	115989267	-	1	1	1	1	1	1	1	UAPRSMB	TRUE
chr11	115995833	-	1	1	1	0	0	1	1	UAPMB	FALSE
chr11	116014283	-	0	1	1	0	0	1	1	APMB	FALSE
chr11	116016840	-	1	1	1	1	1	0	1	UAPRSB	TRUE
chr11	116021324	-	0	1	0	0	0	0	1	AB	FALSE
chr11	116035841	-	0	0	1	0	0	1	1	PMB	FALSE
chr11	116040181	-	0	1	1	0	0	0	1	APB	FALSE
chr11	116123168	-	0	1	1	0	0	1	1	APMB	FALSE
chr11	116133305	-	1	1	1	0	0	1	1	UAPMB	FALSE
chr11	116152578	-	0	0	1	0	0	0	1	PB	FALSE
chr11	116152585	-	0	0	1	0	0	0	1	PB	FALSE
chr11	116155805	-	0	0	1	1	1	0	1	PRSB	FALSE
chr11	116220049	-	0	1	1	0	0	1	1	APMB	FALSE
chr11	116332902	-	1	1	1	0	0	1	1	UAPMB	FALSE
chr11	116333654	-	1	1	1	0	0	1	1	UAPMB	FALSE
chr11	116401477	-	0	1	1	0	0	1	1	APMB	FALSE
chr11	116404217	-	0	1	1	1	1	1	1	APRSMB	FALSE
chr11	116405067	-	1	1	1	0	0	1	1	UAPMB	FALSE
chr11	116405372	-	0	1	1	0	0	1	1	APMB	FALSE
chr11	116407325	-	1	1	1	0	0	1	1	UAPMB	FALSE
chr11	116410215	-	0	0	1	1	0	0	1	PRB	FALSE
chr11	116466410	-	1	0	0	0	0	0	1	UB	FALSE
chr11	116701723	-	0	0	0	0	0	0	1	B	FALSE
chr11	116701729	-	0	0	0	1	1	0	1	RSB	FALSE
chr11	116702219	-	0	0	0	0	0	1	1	MB	FALSE
chr11	116713674	-	1	0	1	0	0	0	1	UPB	FALSE
chr11	116713683	-	0	0	1	0	0	0	1	PB	FALSE
chr11	116713720	-	1	1	0	1	1	0	1	UARSB	FALSE
chr11	117627662	-	1	0	1	0	0	0	1	UPB	FALSE
chr11	117634412	-	0	0	0	1	1	0	1	RSB	FALSE
chr11	117636841	-	0	0	0	0	0	0	1	B	FALSE
chr11	117683525	-	1	1	1	1	1	1	1	UAPRSMB	TRUE
chr11	117686588	-	1	1	0	1	0	1	1	UARMB	FALSE
chr11	118027437	-	0	1	1	0	0	0	1	APB	FALSE
chr11	118053791	-	1	1	1	1	1	1	1	UAPRSMB	TRUE
chr11	118053799	-	0	0	1	1	0	1	1	PRMB	FALSE
chr11	118053800	-	0	0	1	0	0	0	1	PB	FALSE
chr11	118053805	-	1	0	1	1	1	1	1	UPRSMB	TRUE
chr11	118123464	-	1	1	1	0	0	1	1	UAPMB	FALSE
chr11	118133604	-	1	1	1	1	1	1	1	UAPRSMB	TRUE
chr11	118138166	-	1	0	1	0	0	1	1	UPMB	FALSE
chr11	118140657	-	0	1	1	0	0	0	1	APB	FALSE
chr11	118146137	-	0	0	0	0	0	0	1	B	FALSE
chr11	118146413	-	0	0	1	0	0	0	1	PB	FALSE
chr11	118146414	-	0	0	1	1	1	0	1	PRSB	FALSE
chr11	118146415	-	0	0	1	1	1	0	1	PRSB	FALSE
chr11	119150122	-	0	1	1	1	0	1	1	APRMB	FALSE
chr11	119150326	-	0	1	1	0	0	1	1	APMB	FALSE
chr11	119155364	-	1	1	1	1	0	1	1	UAPRMB	FALSE
chr11	119156046	-	0	1	1	0	0	1	1	APMB	FALSE
chr11	119931822	-	0	1	0	0	0	1	1	AMB	FALSE
chr11	119933403	-	1	1	1	0	0	1	1	UAPMB	FALSE
chr11	119954329	-	1	1	1	1	0	1	1	UAPRMB	FALSE
chr11	119957214	-	1	1	1	0	0	1	1	UAPMB	FALSE
chr11	119958015	-	1	1	1	1	1	1	1	UAPRSMB	TRUE
chr11	119958075	-	0	0	0	0	0	0	1	B	FALSE
chr11	119958299	-	0	1	1	0	0	1	1	APMB	FALSE
chr11	119971247	-	1	0	0	0	0	0	1	UB	FALSE
chr11	119971870	-	1	1	1	1	0	0	1	UAPRB	FALSE
chr11	119972336	-	1	1	1	1	1	1	1	UAPRSMB	TRUE
chr11	120208663	-	0	0	0	0	0	0	1	B	FALSE
chr11	120208685	-	0	1	1	0	0	1	1	APMB	FALSE
chr11	120208689	-	0	1	1	1	1	1	1	APRSMB	FALSE
chr11	120208690	-	0	0	1	0	0	1	1	PMB	FALSE
chr11	120235991	-	0	0	1	0	0	0	1	PB	FALSE
chr11	120244734	-	1	0	1	0	0	1	1	UPMB	FALSE
chr11	120328564	-	1	1	0	1	1	1	1	UARSMB	FALSE
chr11	120441364	-	0	0	0	1	0	0	1	RB	FALSE
chr11	120456487	-	1	1	1	0	0	1	1	UAPMB	FALSE
chr11	120457398	-	1	1	1	1	0	1	1	UAPRMB	FALSE
chr11	120472306	-	0	0	1	0	0	0	1	PB	FALSE
chr11	120472310	-	0	1	1	1	1	1	1	APRSMB	FALSE
chr11	120472745	-	1	1	1	1	0	1	1	UAPRMB	FALSE
chr11	120473039	-	1	1	1	1	1	1	1	UAPRSMB	TRUE
chr11	120473939	-	1	1	1	0	0	1	1	UAPMB	FALSE
chr11	120474758	-	0	1	1	0	0	1	1	APMB	FALSE
chr11	120477272	-	0	1	1	1	0	1	1	APRMB	FALSE
chr11	120503209	-	0	0	1	0	0	0	1	PB	FALSE
chr11	120503210	-	0	1	1	0	0	1	1	APMB	FALSE
chr11	120572811	-	1	1	1	0	0	1	1	UAPMB	FALSE
chr11	120588223	-	0	0	0	0	0	0	1	B	FALSE
chr11	120651065	-	1	1	1	1	1	1	1	UAPRSMB	TRUE
chr11	120652366	-	1	0	0	0	0	0	1	UB	FALSE
chr11	120654128	-	0	1	1	0	0	1	1	APMB	FALSE
chr11	120654445	-	1	1	1	0	0	1	1	UAPMB	FALSE
chr11	120655658	-	0	1	1	0	0	1	1	APMB	FALSE
chr11	120656353	-	1	1	1	0	0	1	1	UAPMB	FALSE
chr11	120669656	-	1	1	1	0	0	1	1	UAPMB	FALSE
chr11	120669756	-	0	0	0	1	1	0	1	RSB	FALSE
chr11	120670588	-	1	0	1	1	1	1	1	UPRSMB	TRUE
chr11	120670608	-	0	0	1	0	0	0	1	PB	FALSE
chr11	120671610	-	1	1	1	0	0	1	1	UAPMB	FALSE
chr11	120672124	-	0	1	1	1	0	1	1	APRMB	FALSE
chr11	120672128	-	1	0	1	0	0	1	1	UPMB	FALSE
chr11	120676219	-	0	0	0	0	0	1	1	MB	FALSE
chr11	120676801	-	1	0	1	1	1	1	1	UPRSMB	TRUE
chr11	120676802	-	1	1	1	0	0	1	1	UAPMB	FALSE
chr11	120677295	-	1	0	1	0	0	1	1	UPMB	FALSE
chr11	120678072	-	0	1	1	1	0	1	1	APRMB	FALSE
chr11	120678075	-	0	0	1	1	1	0	1	PRSB	FALSE
chr11	120678595	-	1	1	1	0	0	0	1	UAPB	FALSE
chr11	120679512	-	1	1	1	1	1	1	1	UAPRSMB	TRUE
chr11	120679948	-	1	1	1	0	0	1	1	UAPMB	FALSE
chr11	120680514	-	0	0	0	0	0	0	1	B	FALSE
chr11	120680530	-	1	1	1	0	0	0	1	UAPB	FALSE
chr11	120682068	-	0	1	1	1	1	1	1	APRSMB	FALSE
chr11	120684190	-	0	0	1	0	0	0	1	PB	FALSE
chr11	120756074	-	1	1	1	0	0	1	1	UAPMB	FALSE
chr11	121199984	-	1	1	1	0	0	1	1	UAPMB	FALSE
chr11	3134438	+	1	1	1	0	0	1	1	UAPMB	FALSE
chr11	3143157	+	0	0	1	0	0	1	1	PMB	FALSE
chr11	3143832	+	1	1	1	0	0	1	1	UAPMB	FALSE
chr11	3416238	+	1	1	1	0	0	1	1	UAPMB	FALSE
chr11	3876995	+	1	0	1	0	0	1	1	UPMB	FALSE
chr11	3877060	+	1	0	0	0	0	0	1	UB	FALSE
chr11	3877916	+	0	0	0	0	0	1	1	MB	FALSE
chr11	4036898	+	0	0	0	0	0	0	1	B	FALSE
chr11	4037192	+	1	0	1	0	0	0	1	UPB	FALSE
chr11	4061029	+	1	0	1	1	1	1	1	UPRSMB	TRUE
chr11	4067601	+	1	0	1	0	0	1	1	UPMB	FALSE
chr11	4075294	+	0	1	0	0	0	0	1	AB	FALSE
chr11	4076235	+	0	1	1	0	0	1	1	APMB	FALSE
chr11	4076241	+	1	1	1	0	0	1	1	UAPMB	FALSE
chr11	4076455	+	0	1	1	0	0	1	1	APMB	FALSE
chr11	4077394	+	1	1	1	0	0	1	1	UAPMB	FALSE
chr11	4077763	+	0	1	0	0	0	1	1	AMB	FALSE
chr11	4078046	+	1	1	1	0	0	0	1	UAPB	FALSE
chr11	4079124	+	0	1	1	0	0	1	1	APMB	FALSE
chr11	4080010	+	0	0	1	0	0	0	1	PB	FALSE
chr11	4572266	+	0	1	1	0	0	1	1	APMB	FALSE
chr11	4820350	+	1	0	1	0	0	1	1	UPMB	FALSE
chr11	4939409	+	0	0	0	0	0	0	1	B	FALSE
chr11	4939501	+	1	1	1	1	0	1	1	UAPRMB	FALSE
chr11	5424655	+	1	1	1	1	1	1	1	UAPRSMB	TRUE
chr11	5694216	+	0	1	1	0	0	1	1	APMB	FALSE
chr11	5695432	+	1	1	1	0	0	1	1	UAPMB	FALSE
chr11	5697493	+	0	0	0	0	0	0	1	B	FALSE
chr11	5698195	+	0	1	1	1	0	1	1	APRMB	FALSE
chr11	5699218	+	0	1	1	0	0	1	1	APMB	FALSE
chr11	5861167	+	0	1	1	0	0	1	1	APMB	FALSE
chr11	5862664	+	0	1	1	1	0	1	1	APRMB	FALSE
chr11	5864524	+	0	0	1	0	0	0	1	PB	FALSE
chr11	6247074	+	0	1	1	1	0	0	1	APRB	FALSE
chr11	6247804	+	0	1	1	1	0	1	1	APRMB	FALSE
chr11	6252104	+	0	1	1	1	1	1	1	APRSMB	FALSE
chr11	6295545	+	1	0	1	1	1	0	1	UPRSB	TRUE
chr11	6297474	+	0	1	1	0	0	1	1	APMB	FALSE
chr11	6298241	+	0	0	1	0	0	0	1	PB	FALSE
chr11	6299482	+	1	1	1	1	1	1	1	UAPRSMB	TRUE
chr11	6302386	+	1	1	1	0	0	1	1	UAPMB	FALSE
chr11	6303088	+	0	1	1	0	0	1	1	APMB	FALSE
chr11	6303090	+	0	1	1	0	0	1	1	APMB	FALSE
chr11	6304972	+	1	1	1	0	0	1	1	UAPMB	FALSE
chr11	6316104	+	0	0	0	0	0	1	1	MB	FALSE
chr11	6493579	+	0	0	1	0	0	0	1	PB	FALSE
chr11	21163177	+	1	1	1	0	0	0	1	UAPB	FALSE
chr11	21211313	+	0	1	0	0	0	0	1	AB	FALSE
chr11	21212821	+	1	0	1	0	0	1	1	UPMB	FALSE
chr11	22893434	+	0	0	0	0	0	0	1	B	FALSE
chr11	22894503	+	0	0	0	0	0	0	1	B	FALSE
chr11	22896314	+	0	0	0	0	0	0	1	B	FALSE
chr11	22897013	+	1	1	1	0	0	1	1	UAPMB	FALSE
chr11	22899314	+	0	1	0	0	0	0	1	AB	FALSE
chr11	23156275	+	1	0	0	0	0	0	1	UB	FALSE
chr11	23181306	+	1	1	0	0	0	0	1	UAB	FALSE
chr11	23182502	+	1	1	1	0	0	1	1	UAPMB	FALSE
chr11	23191443	+	0	1	1	0	0	1	1	APMB	FALSE
chr11	23264036	+	0	1	1	0	0	0	1	APB	FALSE
chr11	23264042	+	0	1	1	0	0	0	1	APB	FALSE
chr11	23264062	+	1	1	0	0	0	0	1	UAB	FALSE
chr11	23319282	+	0	0	0	1	0	0	1	RB	FALSE
chr11	23370498	+	0	0	0	0	0	0	1	B	FALSE
chr11	23371444	+	1	1	1	0	0	0	1	UAPB	FALSE
chr11	23566549	+	0	0	0	0	0	0	1	B	FALSE
chr11	23985759	+	1	1	0	0	0	1	1	UAMB	FALSE
chr11	29033818	+	0	1	1	1	1	1	1	APRSMB	FALSE
chr11	29111580	+	0	1	1	0	0	1	1	APMB	FALSE
chr11	29400946	+	1	1	1	0	0	1	1	UAPMB	FALSE
chr11	29641694	+	0	0	0	0	0	1	1	MB	FALSE
chr11	30707659	+	1	1	1	0	0	1	1	UAPMB	FALSE
chr11	30719904	+	0	1	1	1	1	1	1	APRSMB	FALSE
chr11	30748346	+	0	1	0	0	0	0	1	AB	FALSE
chr11	30778357	+	1	1	1	0	0	0	1	UAPB	FALSE
chr11	31830336	+	1	0	0	0	0	0	1	UB	FALSE
chr11	32108660	+	1	1	1	0	0	1	1	UAPMB	FALSE
chr11	32455388	+	0	0	0	0	0	0	1	B	FALSE
chr11	32512643	+	0	0	1	0	0	0	1	PB	FALSE
chr11	32620435	+	1	0	1	0	0	0	1	UPB	FALSE
chr11	32642439	+	1	1	1	0	0	1	1	UAPMB	FALSE
chr11	43250059	+	0	0	0	0	0	0	1	B	FALSE
chr11	43259484	+	0	1	1	0	0	1	1	APMB	FALSE
chr11	44373455	+	1	0	1	1	0	1	1	UPRMB	FALSE
chr11	45697813	+	1	1	1	0	0	1	1	UAPMB	FALSE
chr11	45699909	+	0	1	1	1	1	1	1	APRSMB	FALSE
chr11	45700177	+	0	0	0	0	0	0	1	B	FALSE
chr11	45700183	+	0	0	0	0	0	0	1	B	FALSE
chr11	45700186	+	0	0	0	0	0	1	1	MB	FALSE
chr11	45700187	+	0	0	0	0	0	1	1	MB	FALSE
chr11	45704097	+	1	1	1	0	0	1	1	UAPMB	FALSE
chr11	45720076	+	0	0	0	0	0	1	1	MB	FALSE
chr11	45721379	+	1	1	1	0	0	1	1	UAPMB	FALSE
chr11	48615756	+	0	1	1	1	1	1	1	APRSMB	FALSE
chr11	48615773	+	0	1	0	0	0	0	1	AB	FALSE
chr11	48616876	+	1	0	1	0	0	0	1	UPB	FALSE
chr11	48661505	+	0	0	1	0	0	0	1	PB	FALSE
chr11	49074043	+	1	1	1	1	0	0	1	UAPRB	FALSE
chr11	49693173	+	0	1	1	0	0	1	1	APMB	FALSE
chr11	49695613	+	1	1	1	1	1	1	1	UAPRSMB	TRUE
chr11	49696615	+	0	0	1	0	0	0	1	PB	FALSE
chr11	49974936	+	0	1	1	0	0	1	1	APMB	FALSE
chr11	49981632	+	1	0	1	0	0	1	1	UPMB	FALSE
chr11	50011100	+	1	0	1	0	0	1	1	UPMB	FALSE
chr11	50045785	+	0	0	1	0	0	0	1	PB	FALSE
chr11	50191739	+	0	1	1	0	0	1	1	APMB	FALSE
chr11	50193303	+	1	1	1	0	0	0	1	UAPB	FALSE
chr11	50193561	+	0	0	0	0	0	0	1	B	FALSE
chr11	50194327	+	0	0	0	0	0	0	1	B	FALSE
chr11	50194920	+	1	1	1	1	1	1	1	UAPRSMB	TRUE
chr11	50198126	+	1	1	1	0	0	1	1	UAPMB	FALSE
chr11	50198615	+	0	1	1	0	0	1	1	APMB	FALSE
chr11	51076897	+	1	0	0	0	0	0	1	UB	FALSE
chr11	51087034	+	1	1	1	0	0	0	1	UAPB	FALSE
chr11	51089534	+	0	1	0	0	0	0	1	AB	FALSE
chr11	51404875	+	1	1	1	0	0	1	1	UAPMB	FALSE
chr11	51407392	+	1	0	1	0	0	0	1	UPB	FALSE
chr11	51789372	+	1	1	1	0	0	0	1	UAPB	FALSE
chr11	51932144	+	1	1	1	1	1	1	1	UAPRSMB	TRUE
chr11	51932940	+	0	1	0	0	0	1	1	AMB	FALSE
chr11	52057097	+	0	1	1	0	0	0	1	APB	FALSE
chr11	52200896	+	1	1	1	1	1	1	1	UAPRSMB	TRUE
chr11	53213061	+	1	0	1	0	0	1	1	UPMB	FALSE
chr11	53222744	+	0	1	1	0	0	1	1	APMB	FALSE
chr11	53393383	+	0	0	0	0	0	0	1	B	FALSE
chr11	53408306	+	1	1	1	0	0	1	1	UAPMB	FALSE
chr11	54166465	+	1	1	1	0	0	1	1	UAPMB	FALSE
chr11	54302750	+	1	1	1	0	0	1	1	UAPMB	FALSE
chr11	54504738	+	0	1	0	1	0	0	1	ARB	FALSE
chr11	54509560	+	1	1	1	0	0	0	1	UAPB	FALSE
chr11	55299098	+	1	1	1	0	0	1	1	UAPMB	FALSE
chr11	55307185	+	1	1	0	0	0	1	1	UAMB	FALSE
chr11	55308729	+	0	1	1	1	1	1	1	APRSMB	FALSE
chr11	55309066	+	0	0	0	0	0	0	1	B	FALSE
chr11	55311395	+	1	1	1	1	1	1	1	UAPRSMB	TRUE
chr11	55312038	+	0	0	1	0	0	0	1	PB	FALSE
chr11	55312039	+	0	1	1	1	1	1	1	APRSMB	FALSE
chr11	57855706	+	0	1	1	0	0	1	1	APMB	FALSE
chr11	57861454	+	0	0	1	1	0	0	1	PRB	FALSE
chr11	57861455	+	0	1	1	1	1	1	1	APRSMB	FALSE
chr11	57864253	+	1	1	1	0	0	0	1	UAPB	FALSE
chr11	57864257	+	0	1	1	1	1	1	1	APRSMB	FALSE
chr11	57866047	+	1	1	1	0	0	1	1	UAPMB	FALSE
chr11	57872036	+	1	1	1	1	1	1	1	UAPRSMB	TRUE
chr11	57930917	+	0	1	1	1	1	1	1	APRSMB	FALSE
chr11	57992754	+	0	0	1	1	1	0	1	PRSB	FALSE
chr11	58019795	+	0	1	1	0	0	1	1	APMB	FALSE
chr11	58121337	+	0	0	0	0	0	0	1	B	FALSE
chr11	58459371	+	0	1	1	0	0	1	1	APMB	FALSE
chr11	58792322	+	0	0	0	0	0	0	1	B	FALSE
chr11	58796044	+	0	0	0	0	0	0	1	B	FALSE
chr11	59018009	+	0	1	1	0	0	1	1	APMB	FALSE
chr11	59023050	+	0	0	0	0	0	0	1	B	FALSE
chr11	59268749	+	0	0	1	0	0	0	1	PB	FALSE
chr11	59268785	+	1	1	1	1	1	1	1	UAPRSMB	TRUE
chr11	59568465	+	1	1	1	0	0	1	1	UAPMB	FALSE
chr11	59578885	+	1	1	1	1	0	0	1	UAPRB	FALSE
chr11	60011507	+	1	1	1	0	0	1	1	UAPMB	FALSE
chr11	60281161	+	0	1	1	0	0	1	1	APMB	FALSE
chr11	60521050	+	1	1	1	0	0	0	1	UAPB	FALSE
chr11	60522025	+	0	0	1	0	0	0	1	PB	FALSE
chr11	60756624	+	1	1	1	0	0	1	1	UAPMB	FALSE
chr11	60764643	+	1	1	1	0	0	1	1	UAPMB	FALSE
chr11	61028499	+	1	0	0	0	0	0	1	UB	FALSE
chr11	62097607	+	1	1	1	0	0	0	1	UAPB	FALSE
chr11	62365607	+	0	1	1	0	0	1	1	APMB	FALSE
chr11	62404387	+	0	1	1	1	1	1	1	APRSMB	FALSE
chr11	62416700	+	1	1	1	0	0	1	1	UAPMB	FALSE
chr11	62416704	+	1	0	1	1	1	0	1	UPRSB	TRUE
chr11	62416706	+	0	0	1	0	0	0	1	PB	FALSE
chr11	62416710	+	0	1	1	1	1	1	1	APRSMB	FALSE
chr11	62416713	+	1	1	1	1	1	1	1	UAPRSMB	TRUE
chr11	62416714	+	0	0	1	0	0	0	1	PB	FALSE
chr11	62417080	+	1	1	1	1	0	0	1	UAPRB	FALSE
chr11	62417279	+	1	0	0	0	0	0	1	UB	FALSE
chr11	62418058	+	0	0	0	0	0	1	1	MB	FALSE
chr11	64793199	+	0	1	1	0	0	1	1	APMB	FALSE
chr11	64797075	+	0	1	1	0	0	1	1	APMB	FALSE
chr11	64800977	+	0	1	0	0	0	0	1	AB	FALSE
chr11	64801508	+	0	1	1	0	0	1	1	APMB	FALSE
chr11	64812604	+	1	1	1	0	0	1	1	UAPMB	FALSE
chr11	64813363	+	1	1	0	0	0	1	1	UAMB	FALSE
chr11	64813768	+	0	1	1	0	0	1	1	APMB	FALSE
chr11	64813771	+	0	0	1	0	0	1	1	PMB	FALSE
chr11	64813772	+	0	0	1	0	0	0	1	PB	FALSE
chr11	64813773	+	0	0	1	1	1	0	1	PRSB	FALSE
chr11	68339809	+	0	1	1	0	0	1	1	APMB	FALSE
chr11	68343365	+	0	1	1	0	0	1	1	APMB	FALSE
chr11	68347496	+	1	1	0	0	0	0	1	UAB	FALSE
[truncated: 8,855 more rows]
