# Supplementary material for: TechCrunch Interview With Mark Zuckerberg On $100 Million Education Donation
Source: HighWire-hosted journal article supplement (doi:10.1101/gr.202820.115), 2010-01-01
Supplement: Supplemental_Table_S10.xlsx [file Supplemental_Table_S10.xlsx]

## Sheet: counts_by_cell_line.txt
Accession	Cell Line	Fraction	Selection	Total Reads	Unique Reads	Unique Branchpoints	Unique Introns	A	C	G	T	canonical	canonicalC	canonical2nt	TRAYTRY	TRANYTRY	TRANNYTRY	none	circle	template_switching
SRR307913	HepG2	cell	longNonPolyA	1037	635	522	481	211	291	70	63	49	83	26	49	45	63	264	18	38
SRR307914	HepG2	cell	longNonPolyA	1484	1139	913	854	599	347	96	97	125	100	75	105	92	165	408	14	55
SRR307921	GM12878	cell	longNonPolyA	1073	847	712	679	412	275	70	90	79	93	48	69	55	92	334	7	70
SRR307922	GM12878	cell	longNonPolyA	678	558	493	473	268	182	44	64	48	49	42	28	47	57	229	3	55
SRR307923	H1-hESC	cell	longNonPolyA	798	557	420	396	243	214	49	51	56	94	27	48	33	78	167	13	41
SRR307924	H1-hESC	cell	longNonPolyA	863	571	436	420	239	212	69	51	42	95	28	26	26	98	206	16	34
SRR307930	K562	cell	longNonPolyA	799	750	701	682	437	117	103	93	82	32	41	64	57	96	262	48	68
SRR307931	K562	cell	longNonPolyA	994	891	813	787	468	161	136	126	82	58	55	71	59	88	326	50	102
SRR315303	NHLF	cell	longNonPolyA	227	72	65	64	30	39	1	2	7	14	3	11	7	7	22	0	1
SRR315304	NHLF	cell	longNonPolyA	154	51	41	41	22	18	7	4	1	8	2	4	2	7	21	3	3
SRR315305	K562	nucleoplasm	total	629	614	563	541	349	60	114	91	64	19	43	28	46	89	228	18	79
SRR315306	K562	nucleoplasm	total	441	432	412	406	241	65	70	56	48	20	34	29	26	57	157	17	44
SRR315307	HSMM	cell	longNonPolyA	272	84	64	62	32	40	9	3	9	11	6	4	3	15	30	6	0
SRR315308	HSMM	cell	longNonPolyA	336	106	90	87	49	32	16	9	18	11	8	8	3	12	33	9	4
SRR315309	K562	chromatin	total	559	547	542	527	293	40	125	89	53	8	43	40	30	58	184	9	122
SRR315310	K562	chromatin	total	797	787	766	749	417	69	162	139	90	13	50	44	51	84	258	6	191
SRR315311	K562	nucleolus	total	742	686	586	569	391	107	102	86	61	49	42	35	48	118	228	9	96
SRR315312	K562	nucleolus	total	329	323	309	298	181	35	48	59	35	8	18	13	24	44	108	4	69
SRR315317	AG04450	cell	longNonPolyA	1175	1019	821	735	336	521	71	91	68	160	58	48	76	110	439	20	40
SRR315318	AG04450	cell	longNonPolyA	1339	1038	771	702	341	546	68	83	83	171	36	56	83	124	428	24	33
SRR315319	HMEC	cell	longNonPolyA	208	30	28	28	9	15	4	2	1	8	3	3	3	0	11	0	1
SRR315320	NHEK	cell	longNonPolyA	375	244	219	212	123	63	28	30	29	25	13	17	13	27	86	9	25
SRR315321	NHEK	cell	longNonPolyA	458	274	222	209	85	114	55	20	33	36	6	9	16	23	104	32	15
SRR315322	NHEK	cell	longNonPolyA	189	85	78	75	28	41	7	9	4	13	3	7	3	10	39	2	4
SRR317035	HeLa-S3	cytosol	longNonPolyA	556	509	390	348	152	284	29	44	27	72	28	26	63	40	239	6	8
SRR317036	HUVEC	cytosol	longNonPolyA	945	886	639	594	309	443	63	71	66	129	45	61	60	107	386	13	19
SRR317037	HepG2	cytosol	longNonPolyA	220	208	175	162	60	121	10	17	7	28	8	13	18	22	103	2	7
SRR317038	HepG2	cytosol	longNonPolyA	655	582	429	391	161	353	36	32	42	84	22	34	38	52	281	14	15
SRR317039	H1-hESC	nucleus	longNonPolyA	1293	1123	891	846	531	370	114	108	123	144	75	57	79	120	421	25	79
SRR317040	H1-hESC	cytosol	longNonPolyA	609	560	395	364	212	257	45	46	39	76	34	10	48	77	255	6	15
SRR317041	NHEK	cytosol	longNonPolyA	371	334	233	194	58	235	17	24	12	49	13	15	26	21	191	3	4
SRR317042	K562	nucleus	longNonPolyA	2811	2500	2172	2010	1532	344	319	305	314	120	183	153	195	323	843	71	298
SRR317043	K562	nucleus	longNonPolyA	2332	2054	1786	1669	1281	272	241	260	241	90	138	138	186	294	705	61	201
SRR317044	SK-N-SH RA	cell	longNonPolyA	2043	1341	1054	975	565	515	131	130	147	151	65	72	113	157	519	51	66
SRR317045	SK-N-SH RA	cell	longNonPolyA	1406	891	738	675	357	377	81	76	75	123	48	64	67	105	323	28	58
SRR317046	NHEK	nucleus	longNonPolyA	299	279	261	249	141	44	59	35	18	16	11	18	19	25	121	27	24
SRR317047	NHEK	nucleus	longNonPolyA	436	404	364	345	218	79	73	34	40	22	25	23	24	53	157	35	25
SRR317048	HeLa-S3	cell	longNonPolyA	1457	863	656	606	308	380	91	84	59	101	36	61	56	82	377	32	59
SRR317049	HeLa-S3	cell	longNonPolyA	3946	2194	1480	1319	807	996	214	177	229	276	83	146	140	276	876	68	100
SRR317050	HeLa-S3	nucleus	longNonPolyA	2449	2103	1736	1604	1213	446	207	237	237	142	139	160	172	291	747	39	176
SRR317051	HeLa-S3	nucleus	longNonPolyA	1517	1200	992	930	589	330	126	155	122	108	68	78	81	166	466	28	83
SRR317052	K562	cytosol	longNonPolyA	215	207	185	177	88	84	18	17	18	28	11	19	12	21	83	6	9
SRR317054	HepG2	nucleus	longNonPolyA	990	934	865	816	579	133	93	129	107	50	73	62	72	130	326	12	102
SRR317055	HepG2	nucleus	longNonPolyA	868	816	747	715	466	135	100	115	81	42	62	62	69	118	262	24	96
SRR317056	MCF-7	cell	longNonPolyA	1426	321	230	226	155	107	38	21	41	32	15	28	20	35	121	19	10
SRR317057	MCF-7	cell	longNonPolyA	1548	289	196	192	145	96	32	16	34	33	14	19	16	27	123	13	10
SRR317058	GM12878	cytosol	longNonPolyA	306	283	248	227	80	158	16	29	21	47	15	19	27	24	121	0	9
SRR317059	GM12878	cytosol	longNonPolyA	504	457	368	343	137	255	24	41	22	63	29	33	35	37	213	2	23
SRR317060	GM12878	nucleus	longNonPolyA	19	19	19	19	11	3	0	5	0	1	1	5	1	3	3	0	5
SRR317061	GM12878	nucleus	longNonPolyA	16	15	15	15	8	2	2	3	1	2	3	1	0	1	5	0	2
SRR317062	A549	cell	longNonPolyA	3854	2147	1621	1474	1016	757	195	179	207	275	113	136	159	252	835	63	107
SRR317063	A549	cell	longNonPolyA	3029	2154	1557	1389	988	804	179	183	233	274	97	151	170	248	846	50	85
SRR317064	BJ	cell	longNonPolyA	2451	1704	1137	988	579	910	99	116	146	248	68	90	167	188	735	34	28
SRR317065	BJ	cell	longNonPolyA	1302	966	701	635	352	485	64	65	91	134	44	60	100	86	405	28	18
SRR317066	HUVEC	cell	longNonPolyA	352	257	217	208	118	91	31	17	23	25	11	23	28	28	102	5	12
SRR317067	HUVEC	cell	longNonPolyA	535	352	312	298	159	118	46	29	35	54	20	22	27	35	127	10	22
SRR317068	HUVEC	nucleus	longNonPolyA	272	261	243	241	158	49	28	26	33	17	21	20	27	31	84	3	25
SRR317069	HUVEC	nucleus	longNonPolyA	99	96	93	90	63	15	5	13	9	5	8	5	17	11	29	0	12
SRR534289	IMR90	cell	total	1690	1387	1127	1050	586	461	178	162	112	143	62	89	110	165	525	60	121
SRR534311	CD20+	cell	longNonPolyA	327	292	272	262	142	52	60	38	20	16	17	13	15	34	99	33	45
SRR534312	CD20+	cell	longNonPolyA	323	299	272	258	143	53	66	37	20	14	22	17	12	28	115	28	43
SRR534317	HPC-PL	cell	total	1974	1417	1166	1069	580	543	139	155	148	149	66	68	90	179	584	53	80
SRR534318	HPC-PL	cell	total	6547	2264	1774	1651	1220	563	214	267	255	174	143	173	174	255	817	55	218
SRR534325	CD34+ Mobilized	cell	total	1591	1031	866	819	350	234	288	159	61	40	50	36	39	91	352	103	259
SRR534326	HFDPC	cell	total	2562	1400	1067	991	478	522	238	162	100	131	64	63	77	121	587	99	158
SRR534327	HFDPC	cell	total	2323	902	697	660	306	351	135	110	65	104	43	37	90	67	333	70	93
SRR534331	Monocytes-CD14+	cell	longNonPolyA	288	223	203	193	123	38	32	30	16	14	12	18	12	18	85	17	31
SRR534332	Monocytes-CD14+	cell	longNonPolyA	252	199	186	176	105	34	32	28	22	11	16	9	11	18	71	11	30
SRR534333	Monocytes-CD14+	cell	longNonPolyA	252	203	184	175	115	35	30	23	20	9	6	13	14	12	89	9	31
SRR534334	hMSC-AT	cell	total	2138	905	777	745	421	267	117	100	96	65	45	55	65	94	349	29	107
SRR534335	hMSC-AT	cell	total	1926	1183	989	949	498	370	178	137	111	121	53	61	88	125	430	62	132
SRR545685	HPIEpC	cell	total	5504	1342	873	803	583	454	177	128	115	177	48	62	61	119	644	23	93
SRR545686	HPIEpC	cell	total	2893	1066	841	785	427	379	127	133	85	112	69	52	75	94	462	33	84
SRR545687	GM12878	nucleolus	total	946	866	840	823	462	49	190	165	86	12	55	42	57	94	280	3	237
SRR545688	GM12878	nucleolus	total	713	670	648	634	373	48	137	112	65	14	50	34	49	72	187	3	196
SRR545689	hMNC-PB	cell	total	311	287	276	266	155	33	54	45	26	7	21	18	15	30	110	25	35
SRR545690	hMNC-PB	cell	total	2977	1417	1187	1103	723	173	274	247	144	47	105	66	74	132	527	130	192
SRR545691	hMSC-UC	cell	total	2396	1518	1144	1051	561	609	190	158	99	158	54	76	101	157	695	79	99
SRR545692	hMSC-UC	cell	total	2631	1737	1368	1268	684	720	169	164	152	180	65	80	137	196	764	51	112
SRR545693	hMSC-BM	cell	total	1880	698	618	593	295	181	125	97	57	52	40	37	47	62	282	45	76
SRR545694	hMSC-BM	cell	total	5489	2440	1814	1661	1121	842	225	252	238	224	102	173	153	269	1025	60	196
SRR545701	HOB	cell	total	2105	1115	964	915	392	402	179	142	70	105	54	53	81	116	415	109	112
SRR545702	HOB	cell	total	2549	894	739	683	321	347	127	99	66	76	40	38	69	83	395	67	60
SRR545703	HCH	cell	total	2726	1297	952	903	470	498	195	134	105	138	39	62	110	139	504	106	94
SRR545704	HCH	cell	total	2117	1557	1308	1244	619	496	258	184	100	145	81	81	99	168	606	109	168
SRR545705	NHDF	cell	total	2892	1050	917	882	476	304	148	122	98	109	66	72	74	128	364	52	87
SRR545706	NHDF	cell	total	2185	1053	905	866	401	352	151	149	99	103	51	48	66	106	397	51	132
SRR545707	HSaVEC	cell	total	2742	1485	1232	1153	714	392	181	198	149	136	56	87	128	160	563	60	146
SRR545708	HSaVEC	cell	total	1889	856	719	675	386	265	117	88	83	82	45	44	62	71	346	49	74
SRR545709	HAoAF	cell	total	1729	981	841	812	405	264	186	126	82	54	46	54	105	103	332	86	119
SRR545710	HAoAF	cell	total	491	78	49	48	19	36	19	4	5	9	2	3	4	8	31	15	1
SRR545711	SkMC	cell	total	4957	799	561	527	394	267	72	66	71	79	47	59	49	72	339	23	60
SRR545712	SkMC	cell	total	6144	1053	699	658	484	388	80	101	123	111	47	51	76	108	444	22	71
SRR545713	NHEM.f M2	cell	total	2342	849	735	713	444	212	102	91	93	71	68	53	71	97	299	26	71
SRR545714	NHEM.f M2	cell	total	2303	852	707	669	448	237	75	92	96	70	59	80	74	98	316	7	52
SRR545715	NHEM M2	cell	total	2134	641	554	539	299	158	91	93	70	47	44	44	52	68	239	35	42
SRR545716	NHEM M2	cell	total	1090	606	533	519	312	147	76	71	58	34	28	50	50	91	210	28	57
SRR545717	HAoEC	cell	total	3188	2204	1802	1687	1203	601	163	237	235	198	111	156	212	274	826	21	171
SRR545718	HAoEC	cell	total	3118	1928	1478	1379	1000	540	165	223	201	187	107	151	162	241	732	36	111
SRR545719	HVMF	cell	total	4361	1443	1202	1126	720	434	139	150	173	144	78	93	112	167	515	30	131
SRR545720	HVMF	cell	total	3522	1777	1464	1369	826	595	166	190	178	194	92	122	117	217	694	57	106
SRR545721	HWP	cell	total	935	417	375	361	221	109	39	48	57	36	24	31	30	43	147	12	37
SRR545723	HMEpC	cell	total	1153	718	559	518	270	256	117	75	43	49	31	29	44	70	322	67	63
SRR768411	GM12878	cell	total	11	10	9	9	4	4	1	1	0	0	2	2	0	0	6	0	0
SRR768412	GM12878	cell	total	18	18	18	18	2	12	3	1	1	3	1	2	0	2	9	0	0
SRR768413	K562	cell	total	11	11	11	11	4	2	4	1	0	0	0	1	0	2	4	3	1
SRR768414	K562	cell	total	17	16	16	16	4	6	5	1	1	0	0	1	2	2	8	2	0
