# Supplementary material for: TechCrunch Interview With Mark Zuckerberg On $100 Million Education Donation
Source: HighWire-hosted journal article supplement (doi:10.1101/gr.202820.115), 2010-01-01
Supplement: Supplemental_Table_S11.xlsx [file Supplemental_Table_S11.xlsx]

## Sheet: Sheet1
Primer Name	Sequence
CIRCLES
Human
SPTAN1_HM-F	ATAGGTGGAGCAGCCTCTCA
SPTAN1_HM-R	CCAGCCCAGCTTTATTCCCA
SPTAN1nestd_HM-F	GGATTGAGTGGGACCATGCA
SPTAN1nestd_HM-R	GAAGCTCCCCAGGGCTTAAG
CL_WDR13_mus_F	C5-BP: CTG CTG AGC AGG GGG AGG
CL_WDR13_mus_R	C5-BPnest: GGG GGA GGG CAG GAA CA
CL_WDR13_mus_nstdF	C5-5ss: CTGCTGATGCAGAACAGTGC
CL_WDR13_mus_nstdR	C5-5ssnest: GAACAGTGCCCAGCAAAGAG
Hm ARGEF-BP	TCACCTGACCCCACTCTCTT
Hm ARGEF-5ss:	TGAGGTTCATTTCAGTGATGTAAG
Hm ARGEF-5ssnest	TGATGTAAGGGGCCACCGC
WDR13-BP	CTG CTG AGC AGG GGG AGG
WDR13-BPnest	GGG GGA GGG CAG GAA CA
WDR13-5ss	CTGCTGATGCAGAACAGTGC
WDR13-5ssnest	GAACAGTGCCCAGCAAAGAG
CLK2-BP	TCCTGGCAGCTGATCCTTAG
CLK2-5ss	CAGGTCCTCAGCAGAAAACA
CLK2-Bpnest	TAGCATGCCCTTTTCAGTCC
CLK2-5ssnest	TGCCAGGCAGTCAAGTAAGA
MYH9-BP	CTTGAATCCAGGAGGTGGAG
MYH9-5ss	TCCCCTAGCTCCACAGAGAA
MYH9-Bpnest	ACTCCAACCTGGGTGACAGA
MYH9-5ssnest	AAAGGGGAAAGTGCTGGAAT
DDX5-BP	CCCTCTTTTTCTTGGCATCA
DDX5-5ss:	GTGGAAACAAAAACACGGGTA
DDX5-5ssnest	CAC GGG TAG GTA GAA CTG AAA AGT AGC AC
HNRNPU-BP	AGCCCTTAAAGGCCACCTAA
HNRNPU-5ss	TCCTGTGTTTTCCCAATTCA
HNRNPU-Bpnest	GGC CAC CTA ATA GTT CTT TAA CCT GTA GCT
HNRNPU-5ssnest	TCCAGGGACTGGTGTATTTTG
CCNG1-BP	TCCTCAAATGTTTTTAATGAGCAA
CCNG1-5ss	CTTCAGGAGATAGAAGGGGTTT
CCNG1-Bpnest	GAG CAA AGA CAC ATG TTC ATA GGA TTG CA
CCNG1-5ssnest	GGATTTAGGCTATGTCCTTCACA
ACLY-BP	TTAACCTGCAGGCCAGACTT
ACLY-5ss	CTTTCCTCTGCCCCAAATTC
ACLY-Bpnest	GGTTCCACAGGCTAACTCCA
ACLY-5ssnest	CCAAATTCCCACACCAAAGT
CLHM_SMAP_F	AATGCTCCGTGGAACACAAT
CLHM_SMAP_R	CATGTGCTTTTTGTGCACCT
CLHM_SMAP_nstdF	TGTTTGAGAGGCTTGTTGGA
CLHM_SMAP_nstdR	TGATTGCAGGACAGAGGACA
CLHM_ADAM_F	ACCGTCAAGCTAGGCTCCTC
CLHM_ADAM_R	GCAGTGTCCTCTCACCTTCC
CLHM_ADAM_nstdF	AGTTCCAGTCCTGGTGTGCT
CLHM_ADAM_nstdR	TTTCCCCTAAGCCAAAAATG
CLHM_FN1_F	AGAATCTTGTTTCCGGTTTACA
CLHM_FN1_R	AAAATATACGCCTCACATTTGTTTT
CLHM_FN1_nstdF	GTTTAGAACGGCTCGGGAGA
CLHM_FN1_nstdR	AAGTCAATGGCATTTCCTCAG
Mouse
CLMUS_SMAP_F	GCAGAAAGGAAAGGGGAGAG
CLMUS_SMAP_R	CCAAAGTCTTGGGCTAATTCA
CLMUS_SMAP_NSTDf	CATGGGGGACAAATTGATCT
CLMUS_SMAP_nstdR	GAAGGTCTCCTGGCTCTTCC
CLMUS_ADAM_F	CTGGCAAGCTGGACTCTAGG
CLMUS_ADAM_R	CCATCCTCCCTTCTTCCTTC
CLMUS_ADAM_nstdF	GTTGTCTGGTCTCCCCTGTG
CLMUS_ADAM_nstdR	TCCCTTCTTCCTTCCCTCTT
FN1_mus_F	CTCCCGGGACTCTCTGATTC
FN1_mus_R	CTAAACTTGACGCGGCTGAT
FN1_mus_nstdF	CTCCTCCTCTGTTCGCTAGG
FN1_mus_nstdR	GCAGCTGACATTTCCTCCAT
CL_ARGEF_mus_F	ACCCTTGCCTCCATCTCAGT
CL_ARGEF_mus_R	GTGGGGTAAGAAGCGACTCA
CL_ARGEF_mus_nstdF	CAGTTTGGCCATTTCTTCCT
CL_ARGEF_mus_nstdR	GACTCATTTTAACATTGATGTCCAG
CL_CLK2_mus_F	AACTAGTCTCCAGCGCTCCTT
CL_CLK2_mus_R	CAGAGGACTGAGCAGGAATG
CL_CLK2_mus_nstdF	CGCTCCTTGCTGTGTCCTAT
CL_CLK2_mus_nstdR	CCTCTGCAGACCAAGAAACC
CL_MYH9_mus_F	TGCCGGTCTCTGTCTTTCTT
CL_MYH9_mus_R	CATGAGCCAGCTGTTCTTGA
CL_MYH9_mus_nstdF	CCTTCCTGCTGACATTCAGTT
CL_MYH9_mus_nstdR	CAAGAGAGGGGTGCTGACAT
CL_DDX5_mus_F	CCCCCTTGCTTATAAATTTGTTT
CL_DDX5_mus_R	TGAAAGGATAAAGATGAAAGTTAGTCC
CL_ACLY-MUS-1-AGGT-F	ATAGGTCTGCAAGGCCAGTC
CL_ACLY-mus-AGGT-R	AGGATGTGGCTGCTTTCATT
CL_ACLY-mus-AGGT-F	TGTGGGCGTAATGGGTAACT
CL_ACLY-mus-AGGT-R	AAACTCAGGTCCCCTCACCT
CL_WDR13_mus_F	TCACCAGCCCAATTTCTCTT
CL_WDR13_mus_R	TTGGCTTCTCTATTCCCTTTT
CL_WDR13_mus_nstdF	TGGCCTCAAATTCACTGTGT
CL_WDR13_mus_nstdR	ACAGAGGCAGGGGAGATACA
CL_HNRNPU-MUS-1-AGGT-F	CGATGGCTCAGCAGTTAAGA
CL_HNRNPU-1-AGGT-R	AAACTCAGGTCCCCTCACCT
CL_HNRNPU-2-AGGT-F	TGTTCTTCCAGAGGTCCTGAG
CL_HNRNPU-AGGT-R	GCCAGCAGCATACATTTAACC
CL_CCNG1-MUS-1-AGGT-F	TCTGAAGCTTACATGGTTCTCC
CL_CCNG1-MUS-1-AGGT-R	CAGCGTCTTGTTCTACTTTAGCA
CL_CCNG1-MUS-2-AGGT-F	GTTCCCTTTGGATGATGTGG
CL_CCNG1-MUS-1-AGGT-R	CAGCGTCTTGTTCTACTTTAGCA
SPTAN1_MUS-F	TGCCCCCTTCCTTAAGTACC
SPTAN1_MUS-R	TCCTACTGAAGCTGGCCCTA
SPTAN1nestd_MUS-F	AGCCTTTCCCAGGGTAGAAC
SPTAN1nestd_MUS-R	GAGGCAGGGAGTACAGGTTG
Rat
CLRAT_SMAP_F	GAGTCCTACTCGGGGAAACC
CLRAT_SMAP_R	TGCAGAGATGGCACAGTCTT
CLRAT_SMAP_nstdF	GGAGGAAAGGGGAGAGCAT
CLRAT_SMAP_nstdR	CCCAAACATCAACACTGCAC
CLRAT_ADAM_F	AACCACTGAGCCATCTCACC
CLRAT_ADAM_R	GACAGGCAGACAGGCAGAAC
CLRAT_ADAM_nstdF	TCCAGGTTCTGCCTGTCTTT
CLRAT_ADAM_nstdR	GGCTGCCATCCTCTCTTCTT
FN1_rat_F	CCGGGACTCTCAGGTTCTCT
FN1_rat_R	TGGAAATTCAGCTCCCTGTC
FN1_rat_nstdF	CTGGGCGCTCTACTGTGA
FN1_rat_nstdR	GCTGACATTTTCCCCACAGA
CL_ARGEF_rat_F	CCTTTGCCTCCGTCTCAGT
CL_ARGEF_rat_R	GGGTGGGGCAAGAAGTAAC
CL_ARGEF_rat_nstdF	CCTCCGTCTCAGTTTGGTGT
CL_ARGEF_rat_nstdR	TTTTAGTACCCATGTCCAGCTC
CL_CLK2_rat_F	TCCATCTGGCAACTGGTC
CL_CLK2_rat_R	GGAGTACTGAGCAGGCATGG
CL_CLK2_rat_nstdF	GGGCCTTGATGAGTCCTACA
CL_CLK2_rat_nstdR	TCTGCAGATCAGGAAATCCA
CL_MYH9_rat_F	AGTCCAGCAGCCTCTTTGAA
CL_MYH9_rat_R	ATAAAGCCCAGAGGGAGGTG
CL_MYH9_rat_nstdF	CCCTGCTTTGCTGTTCTGTA
CL_MYH9_rat_nstdR	AAATCAGGAAGCAGCCTGTC
CL_DDX5_rat_F	AAGTTTTTGTTAAAATGGTATTGTTGG
CL_DDX5_rat_R	AAAAACGTAAAGGGTTAAAGATAAAA
CL_ACLY-rat-1-AGGT-F	TGGGGGTTGAAGGTTATAGG
CL_ACLY-rat-AGGT-R	AAGGATGTCGCTGCTTTCAT
CL_ACLY-rat-AGGT-F	AGGCTGACTTCCACGTTTGT
CL_ACLY-rat-AGGT-R	CTGGACCCAGACATGTGAGA
CL_WDR13-RAT-1-AGGT-F	CAGGCTCTCACCATCTAGCC
CL_WDR13-RAT-1-AGGT -R	TGCATGGACTTGGCGTCTAT
CL_WDR13-RAT-2-AGGT -F	CAGGCTTTGAGCTCGTTGAT
CL_WDR13-RAT-2-AGGT -R	CTTTGTGCATCGCTGATGTT
CL_HNRNPU-RAT-1-AGGT-F	TGATCCTTGGGCTTTGTTGT
CL_HNRNPU-RAT-1-AGGT -R	CCAAACTCAGGTCCCACACT
CL_HNRNPU-RAT-2-AGGT -F	TGTGTATGTGCTTGGGTTGAG
CL_HNRNPU-RAT-2-AGGT -R	TGAGTTTTTCCTTAAGCCTCTCC
CL_CCNG1-RAT-1-AGGT-F	CCCTTTGGATGATGAGGAAA
CL_CCNG1-1-AGGT -R	CACAGCATTTTATTTTACTTCAGGA
CL_CCNG1-2-AGGT -F	CAAATACAATGGGGCCTTTA
CL_CCNG1-2-AGGT -R	GGATACATTTCTCTTGTAGCTTGC
SPTAN1_RAT-F	CCAGATGTCAGGAAGCAACA
SPTAN1_RAT-R	GGCAGTGGGACTTAAGCAAG
SPTAN1nestd_RAT-F	n/a
SPTAN1nestd_RAT-R	n/a
Zebrafish
CLZF_SMAP_F	TTTACCGGATTTTCCCATGA
CLZF_SMAP_R	GCATGCATAAAAACTCAGTTGC
CLZF_SMAP_nstdF	AGCCGGAGAAGCTGATATGG
CLZF_SMAP_nstdR	CATGACAGTTTTATGAACACCACA
CLZF_DDX_F	CCACCTACCCCCTCTTTTTC
CLZF_DDX_R	AAACACGGGTAGGTAGAACTGAA
CL-WDR13-ZF-1-AGGT-F	ATGCATGACGGGCTTTATGT
CL-WDR13-ZF-1-AGGT-R	ACACGACACAATGACCTGGA
CL-WDR13-ZF-2-AGGT-F	ACCCTTAAAACCTCCCTTGC
CL-WDR13-ZF-2-AGGT-R	TTCCCTCTGGCTGTATTTTTG
CL_HNRNPU-ZF-1-AGGT-F	TCTGAAGCTGCTTTGACACAA
CL_HNRNPU-ZF-1-AGGT-R	TTTTCAGAGTTTAAGTTCAGTGTGG
CL_HNRNPU-ZF-2-AGGT-F	AAAGCGCTATACAAACAAAGATGA
CL_HNRNPU-ZF-2-AGGT-R	TCACTGCTGAGAGTCCAAACA
CL_CCNG1-ZF-1-AGGT-F	AAACGCTTATTCAACGACCTAGA
CL_CCNG1-ZF-1-AGGT-R	AGGCTGTCTTCATGCCATTT
CL_CCNG1-ZF-2-AGGT-F	TTACAGTGCATGGGAGCATT
CL_CCNG1-ZF-2-AGGT-R	TTTTGAGGCAATCTGTAAAGCA
DISTAL LARIATS
Human
MBLN1_HM_DBP-F	TGGACTATGAGTTCTGGTGTGT
MBLN1_HM_DBP-R	GGTGACTAAAGGAAACTGTTGTGT
MBLN1nestd_HM_DBP-F	TTGACTTAGATTTTGAATGTCTGACT
MBLN1nestd-HM_DBP-R	AAACACTTATGTGAGTCCATGTCA
HNRNPK_HM_DBP-F	TGAGGCAAATAACTTTGTGTCGA
HNRNPK _HM_DBP-R	TCACAAGAGTCAACCCACTGT
HNRNPK nestd_HM_DBP-F	GAGCCAGCCTGCTACTGAAA
HNRNPK nestd_HM_DBP-R	TTTGTGCTCCATGTGCAAGC
PTBP1_HM_DBP-F	GCTGTTCTGTTTCCCGGCAA
PTBP1_HM_DBP-R	TGTTTCACCCAAGCTCTCCC
PTBP1nestd_HM_DBP-F	CCTGTGCCTCTTACCACGAG
PTBP1nestd_HM_DBP-R	GCAAGAGAAAACGCGAACCA
Hm_CLK2_F	GGAAGGGCATTGTGTAGAGC
Hm_CLK2_R	TCCATCTCCAAAGCAGATCC
HmMs_CLK2_nstdF	TTTGGGGACTTGGGATTATG
Hm_CLK2_nstdR	GAGTCGGAGAGCTTCCAAGA
Hm_ACT4_F	ATCCCAAAGGCAAGGAGAAC
Hm_ACT4_R	CAGCAACTGTGATGGGAATG
Hm_ACT4_nstdF	CCTGGGACTTGTCCTCAGTTC
Hm_ACT4_nstdR	ACGAACAGATGCAGAGACGA
Hm_MBLN1-2_F	GGCAGACTCTCTCCTCCTCTC
Hm_MBLN1-2_R	GCAATCTGAACCATTTGAGGA
Hm_MBLN1-2_nstdF	CAAAGAGGAGTTATCCTCCCAAT
Hm_MBLN1-2_nstdR	TCTGGGATACCTGAACAAACA
Hm_TTC_F	TGTTTTTGTCCATAATCGAAAGT
Hm_TTC_R	TGAAGCAATGTCAAACCCAAT
Hm_TTC_nstdF	GAGCTCACCTGGTGGTTTTT
Hm_TTC_nstdR	CCTAAAAAGAAACTTTTCATAATGC
Hm_SFQ_F	GGAATGGATTTTCACATCTGC
Hm_SFQ_R	GGGGAAACTAAAAGAGGTCCA
Hm_SFQ_nstdF	AATGGCTCAAGTGGGAACAT
Hm_SFQ_nstdR	AACAAAACAAAACAAAACAAACACA
Mouse
MBLN1_MUS_DBP-F	AAGAACTTTTATTCAAATGGCTAACTG
MBLN1_MUS_DBP-R	CATTTATGTGGGACCATGTCA
MBLN1nestd_MUS_DBP-F	TTTTAACGTAGCAAATTAAGCCTGT
MBLN1nestd_MUS_DBP-R	AGAAAATAGCATTTAATTGACAAGTG
HNRNPK_MUS_DBP-F	ATATTTGGGGGTTTGGTGTG
HNRNPK _MUS_DBP-R	CAAACAGTTCTGATTGCCAAGA
HNRNPK nestd_MUS_DBP-F	TTAAGAAGCCACGGTCAGGT
HNRNPK nestd_MUS_DBP-R	GCCATATTCAATGGCTTTCA
PTBP1_MUS_DBP-F	CTGCCACCTGGGAACTAACA
PTBP1_MUS_DBP-R	CAGGCTGAGCCAGAGAGAAC
PTBP1nestd_MUS_DBP-F	CAGTGCTTCTCCTTGCATGT
PTBP1nestd_MUS_DBP-R	AAGGGCTACCTGGGCTCTAC
Mus_CLK2_F	TGGCAACATCATCACTTTCC
Mus_CLK2_R	CCAACATCACTGAGGGCATA
Mus_CLK2_nstdF	TTTGGGGACTTGGGATTATG
Mus_CLK2_nstdR	AGAGCTCCCAAGAGGGTAGG
Mus_ACT4_F	GTGCAGCCTCTTACCCTGTC
Mus_ACT4_R	GAGAGTCCTGGAACCTGTGC
Mus_ACT4_nstdF	CCCTACTGAGGCCATGAAGA
Mus_ACT4_nstdR	TGGCCTTGTGTGTACTCTGG
Mus_MBLN1-2_F	GAAGGCAGACTCTCTCCTTTTCT
Mus_MBLN1-2_R	TTGCGTCTGTGAATGGTAGC
MsRt_MBLN1-2_nstdF	TGCCTTTATTGTGCATGCTT
Mus_MBLN1-2_nstdR	TTGTGTGGGATACCTGAACAAA
Mus_TTC_F	CCACGTAAGAAAATGCCTGTG
Mus_TTC_R	GCAGTGGTACTATAATGCTATGCAA
Mus_TTC_nstdF	TGTTGTCCTTTGTGGAGAGC
Mus_TTC_nstdR	AATTAGGACAAGCTATTCATTTTCA
Mus_SFQ_F	TTTTGGAATGGGTTTTCACA
Mus_SFQ_R	ACACAATGGGGGAACTGAAA
Mus_SFQ_nstdF	GGGAAGATCTATTCTTTGAAACAGG
Mus_SFQ_nstdR	CCAGTCAGCTACTTTAAAAAGAGAGAA
Rat
MBLN1_RAT_DBP-F	TTTTGATTGGACTATGAGTTCTGG
MBLN1_ RAT _DBP-R	GGAAATGGACTTGCCCAATA
MBLN1nestd_ RAT _DBP-F	CTTATTCAAATGGATAACTGTTCAAA
MBLN1nestd_ RAT _DBP-R	AGTGGATTTTGAGGGGCTGT
HNRNPK_RAT_DBP-F	GGTTGTTTCCCCATTTTCCT
HNRNPK_ RAT _DBP-R	CCATCTTCAACGGCTTTCAG
HNRNPK_ RAT _DBP-nested F	AGCCAGCCTGCTACTGAAAC
HNRNPK_ RAT _DBP-nestedR:	CACAAGAGGAATGGTACAATTAAGG
PTBP1_RAT_DBP-F	CTTTCCAGGAACAGGTCTGC
PTBP1_RAT_DBP-R	CACCATCTCCCTTCCAACTG
PTBP1_RAT_DBP-nestd F	TTCCACTCCTTGCCTCAGTC
PTBP1_RAT_DBP-nstdR	AAGAAAACACTGCGGCTCTG
Rat_CLK2_F	GTGTGCTTCGTAGAGCATGG
Rat_CLK2_R	TAACACCGAGGGCATAAAGG
Rat_CLK2_nstdF	CCTTTCCCTGTCCTGATTTG
Rat_CLK2_nstdR	AGTGAGAGAGGGCAGGCATA
Rat_ACT4_F	CAGACGACCTTTGACCCAGT
Rat_ACT4_R	TGGCCTTGTGTGTACTCTGG
Rat_ACT4_nstdF	GGCAGGGAAAGTTCCTCTCT
Rat_ACT4_nstdR	GGATGGATGGATGAGCAGAT
Rat_MBLN1-2_F	CTTTCACCACCCCCTCTTTT
Rat_MBLN1-2_R	GCAAGCTGAACCATTTGAGG
Rat_MBLN1-2_nstdF	TGCCTTTATTGTGCATGCTT
Rat_MBLN1-2_nstdR	CCTGTGAATGGTGGCTTCTT
Rat_TTC_F	GCTAGCCACATGAGAGAATGC
Rat_TTC_R	CAAAGAAGCACCCGGACTAT
Rat_TTC_nstdF	TCCACTATGTGAGACTGTTCTCC
Rat_TTC_nstdR	CACCTAGGTTACCCACTTTTTCC
Rat_SFQ_F	CTGGACAAGCATGTCAGTGG
Rat_SFQ_R	AATGGGGGAACTGAAAGTCC
Rat_SFQ_nstdF	TCATTTTGGAATGGGTTTTCA
Rat_SFQ_nstdR	AAAAAGAGAGAAAGAGAGAGGAAAAA
Zebrafish
MBLN1_ZF_DBP-F	TCCTCGCACTTTTCCTCACT
MBLN1_ZF_DBP-R	CAGAACTCAAGCTTGCTCAGG
MBLN1nestd_ZF_DBP-F	GCAGTTGTTTGTGGCTCAGA
MBLN1nestd_ZF_DBP-R	TGATGCATTCGGAAAACAGA
HNRNPK_ZF_DBP-F	CAAATTGAAGCATTTCTGATTCTG
HNRNPK _ZF_DBP-R	CCTGAGCTCCATTGACAACA
HNRNPK nestd_ZF_DBP-F	ATCTGTTCCTCTCCTGTTGTCC
HNRNPK nestd_ZF_DBP-R	TGGGTTAAGTGAGAATCTGCAA
PTBP1_ZF_DBP-F	TTGCACATCAACCGTTTCTT
PTBP1_ZF_DBP-R	CACACAATCAGAGTTGCCAAG
PTBP1nestd_ZF_DBP-F	TGTCTGAAGCCATCTGAAGC
PTBP1nestd_ZF_DBP-R	TAACCAGGTGCCATCCATTT
ZF_CLK2F	GTCTCCCACACTCGAGCAAC
ZF_CLK2r	AACACAAGGCCAATTCCATT
ZF_CLK2NSTF	TGTTGATGCAGGTTGCTTTT
ZF_CLK2NST_R	TACCAAATCCTGGGGCTGT
ZF_ACTN_F	TAAGCATCACCCACACAAGC
ZF_ACTN_R	TGATAAGCGATTTCGGTGAA
ZF_ACTN_nstdF	CTGCCACGCTGAAAGCTAAC
ZF_ACTN_nstdR	TGCTAAAGTGTCACAGCAACC
ZF_MBNL2_F	GCTCAAGACGATTCGGAGAG
ZF_MBNL2_R	TTTGTGCAGAAAGAGCGAAA
ZF_MBNL2_nstdF	GCGTGTTTGATTGGTAAATGG
ZF_MBNL2_nstdR	GGCCCTACTGATTAGGCACA
ZF_TTC_F	CCAATGCCAGTTTAGCCAAT
ZF_TTC_R	GGCCTTGAATCCACATGTCT
ZF_TTC_nstdF	CCATCCATCCATCCATTCAT
ZF_TTC_nstdR	AGAAGTGTGGGAACCCTGTG
SF3B1
net1_f	TGTGATGCAGAGCATTCACTT
net1_r	CCCTTTACAAGCCTGCTTCA
net1_nf	GCTGCTGCTTAATCTGATATTACATAC
net1_nr	TAAAGAGGCAGGAGGGAAGG
mfsd9-f	AAGTGGCAGCGGATTTGTAT
mfsd9-r	AGGTTGGTACCAGGGCTTCT
mfsd9-nf	GGCATGCTATGGAATCCAATTA
mfsd9-nr	CAGGGAAGGGAAGACGTTC
hadha_f	AGGCCCAGCTTTAACATTCA
hadha_r	TGCATTTACCACTTCCTCATTTT
hadha_nf	TCACTTAGCATGTTTAAGGTAGTGC
hadha_nr	CAGCAAATAAAATTAAATTCTCAGGA
rpl24_f	TGAAAATTATTGACAAATTCTTTGGA
rpl24_r	AACTTTAATTACTGAAGACCCAAACC
rpl24_nf	GCCTACAAATAAATGGAGGTAGG
rpl24_nr	TCCATCCGAATAGGTAAAATGC
zdhhc_f	GGCCACTTTGATGCTTTTTC
zdhhc_r	AGAAAGTGCTGGCTCTCTGC
zdhhc_nf	TATGGTGGGAGGTGAGGAAG
zdhhc_nr	AGCAGTGGCAGTTCACTTAGG
2zdhhc_f	TCTCCTGAGTTGCTGGGACT
2zdhhc_r	GCCCTGAATGCTGAAGAAAG
2zdhhc_nf	GGCCACTTTGATGCTTTTTC
2zdhhc_nr	GAAGCTTCCCCTCCCTTAAA
MFSD9-F	AGGGAGTCCTCTCTGATATCAACTT
MFSD9-r	CTTTCTCTGAGTTACTGAAAGCTCCT
MFSD9-F	GGGTCACTGGGACATGAACT
MFSD9-R	TCCAGCAACTGTTGGACTTG
HADHA-F	GACCAGGACTAAAACCTCCAGA
HADHA-R	TTCAGAGGTGCAGGATAAAGG
RPL24-F	CGCCGAGCAGTCAAATTC
RPL24-R	TAGCAGCAGCCATTGCAGTC
ZDHHC16-F	TTATCACCAGACCCCACCAC
ZDHHC16-R	TCTGCCCTTGGCCTGTAG
